# Supplementary material for: The Role of PinX1 in Growth Control of Breast Cancer Cells and Its Potential Molecular Mechanism by mRNA and lncRNA Expression Profiles Screening
Source: Biomed Res Int. 2014 Feb 3;2014:978984. doi: 10.1155/2014/978984 (PMC3929369; doi:10.1155/2014/978984)
Supplement: Supplementary file 1 — Human LncRNA Array V2.0 was applied for screening the alterations of lncRNA and mRNA expression profile between PinX1 overexpressed and control MCF-7 cells. After the quantile normalization and data filtering steps, the mRNA expression profile data qualified for fold-change comparison was listed in Tables S1, and lncRNA expression profile data was listed in Table S2. The differentially expressed mRNAs was listed in Tables S3 and differentially expressed lncRNAs was listed in Tables S4. GO analysis of the differentially expressed mRNAs by biological processes, cellular components and molecular functions was showed in Table S5. Profiling data of enhancer-like lncRNAs was listed in Table S6. The enhancer-like lncRNAs and their adjacent coding gene pairs was listed in Table S7. Profiling data of the Rinn lincRNAs was listed in Table S8. The Rinn lincRNAs and their adjacent coding gene pairs was listed in Table S9. Profiling data of the Hox clusters was listed in Table S10. [file 978984.f1.zip › 978984.f1/Table S1.xls]

## Sheet: All Targets Value - mRNAs
All Targets Value (Entities where at least 2 out of 2 samples have flags in [Present, Marginal]) # Column A: ProbeName, it represents the probe name. # Column B ~ C: Raw Intensity of each sample. # Column D ~ E: Log2 value of Normalized Intensity of each sample. # Column F ~ U: Annotations to each probe, including type, seqname, GeneSymbol, source, RNAlength, chrom, strand, txStart, txEnd, Xhyb, …
	Raw Intensities		Normalized Intensities		Annotations
ProbeName	[Empty Vector](raw)	[pcDNA3.1-PinX1](raw)	[Empty Vector](normalized)	[pcDNA3.1-PinX1](normalized)	type	seqname	GeneSymbol	source	RNAlength	chrom	strand	txStart	txEnd	Xhyb	probeSeq	EntrezID	unigene	GO	ProteinAccession	product
ASHG19A3A052390	1226.82	950.073	10.1746	9.97464	coding	NM_005697	SCAMP2	RefSeq_coding	1313	chr15	-	75137196	75165670		TTGGATTGCAGCCCTGTCTACACTGGATAATCATTCCCTGGCCATATCAGTCATCATGAT	10066	Hs.458917	GO:0005515|GO:0006892|GO:0015031|GO:0005794|GO:0005768|GO:0016021|GO:0043231|GO:0016020|GO:0005730|GO:0005634|GO:0055038|GO:0032588	NP_005688	Secretory carrier membrane protein 2
ASHG19A3A005781	725.412	898.553	9.4112	9.89501	coding	NM_130800	MEN1	RefSeq_coding	2748	chr11	-	64570995	64578035		CCTAGTGTGGGATGTAAGCGCGGAGGCCGCCGCCCACCGCCCGCCGCCATGGGGCTGAAG	4221	Hs.423348	GO:0070412|GO:0000403|GO:0003690|GO:0000400|GO:0018024|GO:0047485|GO:0005515|GO:0006281|GO:0000165|GO:0007420|GO:0034968|GO:0046329|GO:0045786|GO:0008285|GO:0045736|GO:0001933|GO:0043433|GO:0051974|GO:0000122|GO:0030511|GO:0032925|GO:0006974|GO:0009411|GO:0010332|GO:0000785|GO:0032154|GO:0005737|GO:0005829|GO:0035097|GO:0035097|GO:0016363|GO:0005730|GO:0005634|GO:0043234|GO:0005625	NP_570716	Multiple endocrine neoplasia I
ASHG19A3A047831	1247.61	494.344	10.1986	9.04787	coding	NM_001321	CSRP2	RefSeq_coding	901	chr12	-	77252495	77272799		AAGTGTTCCAGATGTGGGGATTCTGTATATGCTGCCGAGAAGATAATTGGAGCTGGAAAG	1466	Hs.530904	GO:0046872|GO:0003674|GO:0008270|GO:0030154|GO:0007275|GO:0045445|GO:0005634	NP_001312	Cysteine and glycine-rich protein 2
ASHG19A3A025431	1853.65	1416.93	10.7686	10.5541	coding	NM_016009	SH3GLB1	RefSeq_coding	6373	chr1	+	87170256	87213866		AACTTTTGGGACAATATATGATTGATGCAGGGACTGAGTTTGGCCCAGGAACAGCTTATG	51100	Hs.136309	GO:0017124|GO:0008093|GO:0008289|GO:0005515|GO:0042803|GO:0006916|GO:0006915|GO:0046847|GO:0007165|GO:0005794|GO:0000139|GO:0005737|GO:0016020|GO:0005741|GO:0005739	NP_057093	SH3-domain GRB2-like endophilin B1
ASHG19A3A002894	69.8118	66.6048	6.04683	6.1363	coding	NM_001146003	NEK11	RefSeq_coding	2793	chr3	+	130745693	131069308		GCCGCTCCGACCACGACAGGGAAAGGAACTGACCAACACTGGATGAATTTGACCATTTCT	79858	Hs.657336	GO:0005524|GO:0042802|GO:0046872|GO:0000166|GO:0005515|GO:0004674|GO:0016740|GO:0007049|GO:0031573|GO:0007243|GO:0006468|GO:0005730|GO:0005730|GO:0005634	NP_665917	NIMA (never in mitosis gene a)- related kinase 11
ASHG19A3A026429	394.664	339.926	8.53449	8.49774	coding	NM_138464	C5orf55	RefSeq_coding	1646	chr5	-	441644	443258		GTAGTGAATTTGGATGGAGGACTGTCTAGTAACTTCTTAACAAAACATTGATTAGAAGTC	116349	Hs.446702	GO:0005576	NP_612473	Chromosome 5 open reading frame 55
ASHG19A3A046708	557.917	437.795	9.02575	8.87092	coding	NM_001099653	FAM86C	RefSeq_coding	2106	chr11	+	71498556	71512276	uc003dpr.3,NR_024363,NR_024362,NR_024361,NR_024254,NR_024253,NR_024241,NR_003494,NM_201598,NM_201400,NM_001137610,NM_001083537,ENST00000509817,ENST00000484945,ENST00000478302,ENST00000340703,	GTGAAGCACCCGCCGTCAGTCAAGTATGCCCGGTGCTTTCTCTCAGAACTCATCAAAAAG	55199	Hs.567527		NP_689776	Family with sequence similarity 86, member C
ASHG19A3A053958	500.951	291.754	8.87178	8.27448	coding	NM_012091	ADAT1	RefSeq_coding	2727	chr16	-	75632997	75657154		TACTGCCAATGGCTTTCCACAGGGAACAACAAAGAAAACAATTGGAAGCCTTCAGGCAAG	23536	Hs.729312	GO:0003723|GO:0016787|GO:0046872|GO:0008251|GO:0006396|GO:0008033	NP_036223	Adenosine deaminase, tRNA-specific 1
ASHG19A3A025127	283.791	208.773	8.06451	7.79126	coding	NM_182524	ZNF595	RefSeq_coding	2894	chr4	+	53226	88099		GTTCCATATTTATCTTTGAACATGTAGCATCTCTTTCCGCAAATAAATGCAGACTTTGGT	152687	Hs.709469	GO:0003677|GO:0046872|GO:0008270|GO:0006355|GO:0005622|GO:0005634	NP_872330	Zinc finger protein 595
ASHG19A3A013697	34922.5	29813.4	15.0424	14.9207	coding	NM_006430	CCT4	RefSeq_coding	2349	chr2	-	62095262	62115791		AACAGAACTAAGAAACCGGCATGCCCAGGGAGAAAAAACTGCAGGCATTAATGTCCGAAA	10575	Hs.421509	GO:0005524|GO:0000166|GO:0051082|GO:0051084|GO:0044267|GO:0006457|GO:0005832|GO:0005737|GO:0005737|GO:0005856|GO:0005829|GO:0042470|GO:0005815|GO:0005730|GO:0005634	NP_006421	Chaperonin containing TCP1, subunit 4 (delta)
ASHG19A3A044594	120.2	86.567	6.82987	6.50766	coding	NM_002775	HTRA1	RefSeq_coding	2138	chr10	+	124221040	124274424		GCCAAAATCAAGGATGTGGATGAGAAAGCAGACATCGCACTCATCAAAATTGACCACCAG	5654	Hs.501280	GO:0005520|GO:0008233|GO:0004252|GO:0030514|GO:0030512|GO:0006508|GO:0001558|GO:0031012|GO:0005576|GO:0005615	NP_002766	HtrA serine peptidase 1
ASHG19A3A052259	9080.53	8481.14	13.0765	13.121	coding	NM_014736	KIAA0101	RefSeq_coding	1508	chr15	-	64657212	64673702		TCTGAAAAAGAGAATCAGATTCCTGAAGAGGCAGGAAGCAGTGGCTTAGGAAAAGCAAAG	9768	Hs.81892	GO:0005739|GO:0005634	NP_055551	KIAA0101
ASHG19A3A006787	235.67	251.618	7.79559	8.05928	coding	NM_018896	CACNA1G	RefSeq_coding	7825	chr17	+	48638448	48704431	NM_198396,	CAGCCTGGGAGGCTCCGACCCACAGATCCCTCTAGCTGAGATGGAGGCTCTGTCTCTGAC	8913	Hs.591169	GO:0008332|GO:0005244|GO:0007411|GO:0006811|GO:0055085|GO:0006810|GO:0016021|GO:0016020|GO:0005891	NP_938407	Calcium channel, voltage-dependent, T type, alpha 1G subunit
ASHG19A3A003996	278.152	266.095	8.03593	8.1415	coding	NM_002194	INPP1	RefSeq_coding	2035	chr2	+	191208195	191236390		TGCTCTGTCCTCATCCCCGGCTTAGCTGACGGCCCAGAGGGTGGGTGCCAATTCCACCAG	3628	Hs.32309	GO:0016787|GO:0004437|GO:0004441|GO:0046872|GO:0006796|GO:0007165	NP_002185	Inositol polyphosphate-1-phosphatase
ASHG19A3A002220	89.3033	120.759	6.40456	6.99954	coding	NM_001130996	HMGCR	RefSeq_coding	4430	chr5	+	74632992	74657924		TTACAGGGATTATAATTACTCCTTGCTTGGTGGAGGTGCCAGCAGCCGAGTCCTTGCAGA	3156	Hs.628096	GO:0050661|GO:0004420|GO:0016491|GO:0006695|GO:0015936|GO:0008354|GO:0008406|GO:0008299|GO:0055114|GO:0005783|GO:0005789|GO:0016021|GO:0016020|GO:0005778|GO:0005777	NP_001124468	3-hydroxy-3-methylglutaryl-CoA reductase
ASHG19A3A004480	57276	64481.9	15.7861	15.992	coding	NM_006263	PSME1	RefSeq_coding	1012	chr14	+	24605377	24608175		GGTCATGGAGATCCGCAATGCTTATGCTGTGTTATATGACATCATCCTGAAGAACTTCGA	5720	Hs.75348	GO:0006977|GO:0000082|GO:0000216|GO:0016070|GO:0000084|GO:0031145|GO:0031145|GO:0006915|GO:0000075|GO:0034641|GO:0016071|GO:0000278|GO:0051436|GO:0051437|GO:0042981|GO:0006521|GO:0051439|GO:0016032|GO:0005737|GO:0008537|GO:0000502	NP_788955	Proteasome (prosome, macropain) activator subunit 1 (PA28 alpha)
ASHG19A3A012575	809.69	1341.3	9.57395	10.4753	coding	NM_172341	PSENEN	RefSeq_coding	678	chr19	+	36236493	36237903		GGTTCTTCCGAGAGGCCTTCCTTGTCCCAGCCTACACAGAACAGAGCCAAATCAAAGGCT	55851	Hs.534465	GO:0004190|GO:0004175|GO:0008233|GO:0005515|GO:0007220|GO:0007219|GO:0042987|GO:0006915|GO:0008624|GO:0006509|GO:0031293|GO:0048011|GO:0043085|GO:0016485|GO:0005794|GO:0032580|GO:0005783|GO:0005789|GO:0005887|GO:0005886|GO:0005886	NP_758844	Presenilin enhancer 2 homolog (C. elegans)
ASHG19A3A029866	677.551	844.496	9.31197	9.81052	coding	NM_001135105	KCNK16	RefSeq_coding	1412	chr6	-	39282474	39290330		TTTGCCTCTCCCATCATCCAACAGCAAGTGGGCTCCTATGTGGCTGGGTTCCTCTGCACA	83795	Hs.287765	GO:0005267|GO:0005244|GO:0006811|GO:0071805|GO:0006813|GO:0016021|GO:0016020	NP_115491	Potassium channel, subfamily K, member 16
ASHG19A3A014689	268.801	282.735	7.98905	8.23003	coding	NM_016953	PDE11A	RefSeq_coding	9285	chr2	-	178487978	178937482		AGATATCTCCAATGACCTTGACCTCACCAGCCTGAGCTACAAGATTCTCATCTTTGTCTG	50940	Hs.570273	GO:0004115|GO:0047555|GO:0004114|GO:0004112|GO:0016787|GO:0046872|GO:0007596|GO:0030168|GO:0007165|GO:0005575|GO:0005737|GO:0005829|GO:0005829	NP_058649	Phosphodiesterase 11A
ASHG19A3A001749	67.1137	112.214	5.98856	6.88894	coding	NM_001099696	REPIN1	RefSeq_coding	2987	chr7	+	150065878	150071133		CGGGCGCCGCGTCCCTGCACAGCCCGCCGCAGAGCAGAGGAAGAACCGATGCTGGAACGT	29803	Hs.647086	GO:0003677|GO:0046872|GO:0008270|GO:0006260|GO:0005622|GO:0005664|GO:0005634	NP_055189	Replication initiator 1
ASHG19A3A042525	259.68	225.023	7.93622	7.8956	coding	NM_005028	PIP4K2A	RefSeq_coding	3833	chr10	-	22823766	23003503		AGAAAACATGCCGAGCCATTTCAAGTTTAAGGAATACTGCCCGATGGTCTTCCGTAACCT	5305	Hs.57079	GO:0016308|GO:0016309|GO:0005524|GO:0016301|GO:0000166|GO:0016740|GO:0016310|GO:0005575	NP_005019	Phosphatidylinositol-5-phosphate 4-kinase, type II, alpha
ASHG19A3A021548	133.225	158.447	6.97571	7.39254	coding	NM_007354	C3orf27	RefSeq_coding	2700	chr3	-	128290843	128294929		AACTTCTGTCCCATTTTTCAGAGCTAAAGTGACAAGCCACATCCACGTCCCTGGTTAAAG	23434	Hs.194283		NP_031380	Chromosome 3 open reading frame 27
ASHG19A3A001644	103.582	112.692	6.62208	6.8959	coding	NM_001097589	SPRR3	RefSeq_coding	918	chr1	+	152974222	152976331		GAACACCTCGACCTTCTCTGCACAGCAGGTCCAGCATCCTTTGAAGCATGAGTTCTTACC	6707	Hs.139322	GO:0005515|GO:0005198|GO:0008544|GO:0031424|GO:0030216|GO:0018149|GO:0042060|GO:0005737	NP_005407	Small proline-rich protein 3
ASHG19A3A016797	300.198	191.355	8.1443	7.66198	coding	NM_021824	NIF3L1	RefSeq_coding	1649	chr2	+	201754107	201768655		CGTGGTTTTTCACTGTCCTGGAAAAGGCCTGAAGTGGCACTGAAATGAGGCATAGATGAG	60491	Hs.145284	GO:0005515|GO:0008134|GO:0045893|GO:0005737|GO:0005739	NP_068596	NIF3 NGG1 interacting factor 3-like 1 (S. pombe)
ASHG19A3A026957	224.96	218.198	7.72795	7.85562	coding	NM_005713	COL4A3BP	RefSeq_coding	5395	chr5	-	74666928	74807454	NM_001130105,	TTCCTCCATGTCTTCCATTGATCTAGTCAGTGCCTCTGATGATGTTCACAGATTCAGCTC	10087	Hs.270437	GO:0097001|GO:0070273|GO:0005515|GO:0004672|GO:0035621|GO:0000902|GO:0008283|GO:0006672|GO:0007029|GO:0003007|GO:0006955|GO:0001701|GO:0055088|GO:0006869|GO:0070584|GO:0006936|GO:0006468|GO:0034976|GO:0007165|GO:0006665|GO:0006810|GO:0005794|GO:0005737|GO:0005829|GO:0005783|GO:0005789|GO:0005789|GO:0005739|GO:0048471	NP_112729	Collagen, type IV, alpha 3 (Goodpasture antigen) binding protein
ASHG19A3A000850	752.778	815.599	9.46621	9.76154	coding	NM_001007229	SPOP	RefSeq_coding	2982	chr17	-	47676247	47755525		CAGCAGCTGTCGCCGCCGCTCTCAGAGATTTCCTGTTAGACAAGACAAATTAGAGTTTTC	8405	Hs.463382	GO:0005515|GO:0006397|GO:0005634	NP_003554	Speckle-type POZ protein
ASHG19A3H0000507	145.827	145.034	7.10437	7.26219	coding	NM_153693_intron1-	NM_153693	HOX cluster	11160	chr12	-	54411198	54422359		AGGATAAGGAAGGGTTAGTGAAGTAGGAATTCATCCCTTTGCCTTTACCTGGTCGGTCTA
ASHG19A3A014892	11763.6	14889.5	13.4476	13.9255	coding	NM_213589	RAPH1	RefSeq_coding	9615	chr2	-	204298540	204400058		GTAATGGCTTAGCACACTAGTCGTACAGTCAGTGTAAATGTTTTTCATTTACATGTTTTC	65059	Hs.471162	GO:0007160|GO:0007165|GO:0005737|GO:0005856|GO:0030175|GO:0030027|GO:0005634|GO:0005886	NP_998754	Ras association (RalGDS/AF-6) and pleckstrin homology domains 1
ASHG19A3A036795	156.377	82.3772	7.2067	6.43905	coding	NM_015243	VPS13B	RefSeq_coding	2822	chr8	+	100025493	100222013		ATTTCATGTAATACATAATTGTATAGTCAAAATGGCTCACATATTAAATATTCTTTATAC	157680	Hs.191540	GO:0008104|GO:0015031	NP_858047	Vacuolar protein sorting 13 homolog B (yeast)
ASHG19A3A008639	3152.67	2081.28	11.5402	11.1131	coding	NM_001001998	EXOSC10	RefSeq_coding	2834	chr1	-	11126677	11159938		GGACACCGTGCTCCCGTCTCTCAGGCAGCGAAGTTCGATCCATCAACCAAAATCTATGAA	5394	Hs.632368	GO:0008408|GO:0003723|GO:0004532|GO:0016787|GO:0042802|GO:0000166|GO:0005515|GO:0004674|GO:0071034|GO:0006396|GO:0044237|GO:0071044|GO:0000460|GO:0071028|GO:0071035|GO:0071048|GO:0000956|GO:0000184|GO:0006139|GO:0005737|GO:0005622|GO:0000176|GO:0005730|GO:0005634|GO:0035327	NP_002676	Exosome component 10
ASHG19A3A017327	241.187	134.664	7.82845	7.15452	coding	NM_015939	TRMT6	RefSeq_coding	2311	chr20	-	5918485	5931173		TGTTGACGTTGGGAAATATCCGTGCTGGCAACAAAATGATTGTGATGGAAACGTGTGCAG	51605	Hs.128791	GO:0005515|GO:0003743|GO:0006446|GO:0008033|GO:0005634	NP_057023	TRNA methyltransferase 6 homolog (S. cerevisiae)
ASHG19A3A050844	10807.1	11909.2	13.3289	13.6066	coding	NM_016029	DHRS7	RefSeq_coding	1404	chr14	-	60611501	60632211		TTGCCCAGGACCTGTGCAATCAAATATTGTGGAGAATTCCCTAGCTGGAGAAGTCACAAA	51635	Hs.59719	GO:0005488|GO:0016491|GO:0055114	NP_057113	Dehydrogenase/reductase (SDR family) member 7
ASHG19A3A008966	87.7735	76.5494	6.37757	6.33978	coding	NM_012352	OR1A2	RefSeq_coding	930	chr17	+	3100812	3101742		GTGATAACTGTGATGTATGTGGCAGTGACCCCAGCATTAAATCCTTTCATCTATAGTCTG	26189	Hs.532660	GO:0004984|GO:0004872|GO:0050896|GO:0007608|GO:0016021|GO:0005886	NP_036484	Olfactory receptor, family 1, subfamily A, member 2
ASHG19A3A020724	552.722	272.127	9.01386	8.17418	coding	NM_002880	RAF1	RefSeq_coding	3291	chr3	-	12625101	12705700		AGTGATGCTGTCCACTCGGATTGGGTCAGGCTCTTTTGGAACTGTTTATAAGGGTAAATG	5894	Hs.159130	GO:0005524|GO:0016301|GO:0046872|GO:0000166|GO:0005515|GO:0004672|GO:0004674|GO:0005057|GO:0016740|GO:0000165|GO:0007265|GO:0000186|GO:0006915|GO:0007411|GO:0007596|GO:0008283|GO:0007173|GO:0008286|GO:0008285|GO:0048011|GO:0016310|GO:0030168|GO:0033138|GO:0006468|GO:0007165|GO:0007264|GO:0007268|GO:0005829|GO:0005829|GO:0005741|GO:0005886	NP_002871	V-raf-1 murine leukemia viral oncogene homolog 1
CUST_48_PI426249100	81.5209	133.851	6.27109	7.14584	coding	NM_021193_Exon1+	NM_021193	HOX cluster	574	chr2	+	176964529	176965103	NM_021193,	AATCTGCAGTCGCCAGACTCTTTCTACTTCTCCAACCTGAGGCCGAATGGCGGCCAGTTG
ASHG19A3A012692	16377.7	22418.3	13.9357	14.5196	coding	NM_001042544	LTBP4	RefSeq_coding	5163	chr19	+	41103140	41135725		GCCGCCGCCCCCTCCTGCTGGTGCTGTTGCTGCCGCTCTTCGCAGCCGCCACCTCCGCCG	8425	Hs.466766	GO:0005488|GO:0005509|GO:0005539|GO:0005178|GO:0050431|GO:0005024|GO:0030252|GO:0046879|GO:0007275|GO:0006457|GO:0045595|GO:0001558|GO:0030162|GO:0017015|GO:0031012|GO:0005576|GO:0005615|GO:0005578	NP_003564	Latent transforming growth factor beta binding protein 4
ASHG19A3A046483	4303.58	3311.49	11.9972	11.7663	coding	NM_001145077	LRRC10B	RefSeq_coding	2230	chr11	+	61276271	61278484		CCCCACATGGTAATGTTTTCTTTAGAGAGAAGAAAAAACAACTGGCTGTAAACGTAAATT	390205	Hs.441122		NP_001138549	Leucine rich repeat containing 10B
ASHG19A3A047748	231.387	327.453	7.76833	8.44481	coding	NM_178539	FAM19A2	RefSeq_coding	4069	chr12	-	62102042	62586551		TAATAAGAACAAGATAGAAGAACGGTCACAAACAGTCAAGTGCTCCTGCTTCCCTGGGCA	338811	Hs.269745	GO:0005737	NP_848634	Family with sequence similarity 19 (chemokine (C-C motif)-like), member A2
ASHG19A3A012139	517.185	499.008	8.91804	9.06077	coding	NM_020415	RETN	RefSeq_coding	479	chr19	+	7733971	7735340		TCTAGCAAGACCCTGTGCTCCATGGAAGAAGCCATCAATGAGAGGATCCAGGAGGTCGCC	56729	Hs.283091	GO:0005179|GO:0008150|GO:0045444|GO:0032868|GO:0005576|GO:0005615|GO:0005634	NP_065148	Resistin
ASHG19A3A043229	2911.27	3790.93	11.4138	11.968	coding	NM_001174084	POLL	RefSeq_coding	2804	chr10	-	103338638	103348027		CAGGGCGTTCCCACTCACCCCCGAAAGTCCTCCTCCTTCCTCTGCGAGTCTGTGTTGGAG	27343	Hs.523230	GO:0003677|GO:0003887|GO:0016829|GO:0046872|GO:0016779|GO:0016740|GO:0006260|GO:0006289|GO:0016446|GO:0005622|GO:0005634	NP_037406	Polymerase (DNA directed), lambda
ASHG19A3A049086	1896.51	1287.54	10.8036	10.4172	coding	NM_001109903	RNFT2	RefSeq_coding	2914	chr12	+	117176095	117291434		AAAGGGAAGCAACAGGAACTTCTGCAACTGGTTTTTATCGGAAAGATCATCCTGCCTGCA	84900	Hs.437195	GO:0046872|GO:0008270|GO:0016021|GO:0016020	NP_116203	Ring finger protein, transmembrane 2
ASHG19A3A038791	1458.82	1415.06	10.4272	10.552	coding	NM_012383	OSTF1	RefSeq_coding	1313	chr9	+	77703397	77762113		TTTGGACAACAGAGTGGGTGTTAATGGCTTAGACAAAGCTGGAAGCACTGCCTTATACTG	26578	Hs.494192	GO:0017124|GO:0042802|GO:0005515|GO:0001503|GO:0007165|GO:0005737|GO:0005622	NP_036515	Osteoclast stimulating factor 1
ASHG19A3A005796	512.657	435.877	8.90295	8.86555	coding	NM_133274	FCAR	RefSeq_coding	1561	chr19	+	55385548	55401839	NM_133273,NM_133272,	AAACAGACCACCCTCCTGTGTCTTGGGGACTTTCCCATGCCTTTCATATCTGCCAAATCG	2204	Hs.659872	GO:0019862|GO:0004872|GO:0006955|GO:0005576|GO:0005887|GO:0005886	NP_579813	Fc fragment of IgA, receptor for
ASHG19A3A021921	844.912	436.552	9.63155	8.86741	coding	NM_016486	TMEM69	RefSeq_coding	1487	chr1	+	46153846	46160108		CTTTCAATAGGGGCCAGTATGCTTCGCTTCATCCAGAAGTTTTCTCAAGCATCTTCAAAG	51249	Hs.727642	GO:0016021|GO:0016020	NP_057570	Transmembrane protein 69
ASHG19A3A035913	1130.81	808.839	10.0577	9.74822	coding	NM_152836	SNX16	RefSeq_coding	3225	chr8	-	82711819	82754521	NM_022133,	CCAGAAGAAAGCTGGGTAGTTTTCAGAAGATACACTGACTTCTCTAGGCTTAATGACAAA	64089	Hs.492121	GO:0042802|GO:0035091|GO:0007154|GO:0045022|GO:0008333|GO:0006622|GO:0015031|GO:0005737|GO:0005769|GO:0031901|GO:0031313|GO:0005770|GO:0031902|GO:0005764	NP_690050	Sorting nexin 16
ASHG19A3A018761	105.358	106.612	6.6471	6.81455	coding	NM_181614	KRTAP19-7	RefSeq_coding	192	chr21	-	31933417	31933608		CAGATACAGCTGCTGCCACCCATCATGCTATGGGGGATACTGGTCTTCTGGATTCTATTG	337974	Hs.553696	GO:0005882	NP_853645	Keratin associated protein 19-7
ASHG19A3A038352	1248.07	818.012	10.1992	9.76501	coding	NM_001146695	KDM4C	RefSeq_coding	3850	chr9	+	6757640	7077264	NM_001146696,	ATTGGCATTCAAGATGCAACACCTACAATATGGTGAATTAAAGATGCCATTTGCATGGAT	23081	Hs.709425	GO:0050681|GO:0019899|GO:0032454|GO:0032454|GO:0046872|GO:0003676|GO:0016491|GO:0016702|GO:0008270|GO:0016568|GO:0033169|GO:0033169|GO:0055114|GO:0008284|GO:0034339|GO:0000790|GO:0005634	NP_055876	Lysine (K)-specific demethylase 4C
ASHG19A3A027388	2472.96	1104.05	11.181	10.1954	coding	NM_015146	SEPT8	RefSeq_coding	4344	chr5	-	132091696	132113067	NM_001098813,	CTATGCAAACACGTAAAAGCCATGAATGCTGGAATCCAAAACTGACGAGGTTTATTTTTT	23176	Hs.522057	GO:0005525|GO:0000166|GO:0005515|GO:0007049|GO:0005737|GO:0005856|GO:0031105	NP_055961	Septin 8
ASHG19A3A040983	286.729	186.747	8.0791	7.62747	coding	NM_001098407	GAGE2D	RefSeq_coding	561	chrX	+	49226137	49233479	NM_001475,NM_001474,NM_001472,NM_001468,NM_001127345,NM_001127212,NM_001127200,NM_001127199,NM_001098412,NM_001098411,NM_001098406,NM_001040663,	GAGGCAGTGCTGTGTGGTTCCTGCCGTCCGGACTCTTTTTCCTCTACTGAGATTCATCTG	100101629	Hs.668804	GO:0005515|GO:0006968	NP_036328	G antigen 8
ASHG19A3A019281	7355.92	2616.56	12.7658	11.444	coding	NM_178865	SERINC2	RefSeq_coding	2011	chr1	+	31885962	31907524		GACTTCGTGCCTTACTGAGTCTCTAAGACTTTTTCTAATAAACAAGCCAGTGCGTGTACC	347735	Hs.270655	GO:0016021|GO:0016020	NP_849196	Serine incorporator 2
ASHG19A3A052376	98.3824	86.5791	6.54963	6.50789	coding	NM_001142618	STRA6	RefSeq_coding	2848	chr15	-	74471809	74495556		TACCAATGAGACACATGTTGCCTCCTTCATGGAAACCCTAGGAGAAGAAACGGACAGATT	64220	Hs.24553	GO:0004872|GO:0006810|GO:0016021|GO:0005886|GO:0043234	NP_071764	Stimulated by retinoic acid gene 6 homolog (mouse)
ASHG19A3A025646	228.42	160.958	7.75037	7.41519	coding	NM_152291	MUC7	RefSeq_coding	2467	chr4	+	71337833	71348713		CTCGACTGGAGTGTTATAAAACCTGAAAATTCTCTTGTGCTTTCTCTTCTTTTGCTTCTA	4589	Hs.631946	GO:0005515|GO:0005576	NP_689504	Mucin 7, secreted
ASHG19A3A034994	1013	631.809	9.89986	9.39343	coding	NM_003117	SPAM1	RefSeq_coding	2438	chr7	+	123565285	123611459		GGAGAAGGCAAGTTACAAAGATAGACCTTCCCTCAAGATAATCAGATTTTCATGGTATTA	6677	Hs.121494	GO:0004415|GO:0016798|GO:0007339|GO:0005975|GO:0007155|GO:0007342|GO:0031225|GO:0005886	NP_694859	Sperm adhesion molecule 1 (PH-20 hyaluronidase, zona pellucida binding)
ASHG19A3A039819	107.497	76.2563	6.67719	6.33351	coding	NM_001037735	ZNF630	RefSeq_coding	2529	chrX	-	47917568	47930508	AK308650,	ATTGTCACATCCAGCTGTTGAAGAGTGGTTAACTCAGCTTGATCTCCGAAGACTCTTCTG	57232	Hs.650883	GO:0003677|GO:0046872|GO:0008270|GO:0006355|GO:0005622|GO:0005634	NP_001177184	Zinc finger protein 630
ASHG19A3A004413	927.992	431.742	9.76872	8.85189	coding	NM_005548	KARS	RefSeq_coding	2017	chr16	-	75661623	75681585		GCAGCGAGCCGAAACTGAGCAAGAATGAGCTGAAGAGACGCCTGAAAGCTGAGAAGAAAG	3735	Hs.3100	GO:0005524|GO:0016874|GO:0004824|GO:0004824|GO:0046872|GO:0003676|GO:0000166|GO:0000049|GO:0010467|GO:0044419|GO:0006430|GO:0006418|GO:0008033|GO:0005737|GO:0005829|GO:0005576|GO:0005759|GO:0005739|GO:0005634|GO:0005886|GO:0005625	NP_005539	Lysyl-tRNA synthetase
ASHG19A3A054696	13130.3	17525.3	13.6139	14.1744	coding	NM_003946	NOL3	RefSeq_coding	1402	chr16	+	67207869	67209624		GATTCTGACCAGTGACTTACACAAAAGGCGCTCTATACATATTATAATATATTCGCTTAC	8996	Hs.513667	GO:0003723|GO:0042802|GO:0005515|GO:0008380|GO:0006916|GO:0006397|GO:0042981|GO:0005737|GO:0005829|GO:0005622|GO:0005730|GO:0005634	NP_003937	Nucleolar protein 3 (apoptosis repressor with CARD domain)
ASHG19A3A005069	74.1	101.762	6.13206	6.74331	coding	NM_018909	PCDHA6	RefSeq_coding	5287	chr5	+	140207649	140391929		TTTAAATGAAGATCATGATGCCAAACCACGACAGCCCAACCCTGACTGGCGTTACTCTGC	56117	Hs.199343			Protocadherin alpha cluster, complex locus
CUST_19_PI418767722	681.123	1040.23	9.32024	10.1048	coding	NM_000291	PGK1	RefSeq_coding	2439	chrX	+	77359665	77382322		ATATTGCTGAATGCAAGAAGTGGGGCAGCAGCAGTGGAGAGATGGGACAATTAGATAAAT	5230	Hs.78771	GO:0005524|GO:0000166|GO:0004618|GO:0004618|GO:0016740|GO:0005975|GO:0006094|GO:0006006|GO:0006096|GO:0016310|GO:0005737|GO:0005829	NP_000282	Phosphoglycerate kinase 1
ASHG19A3A020407	71.2859	79.5172	6.07651	6.39068	coding	NM_024681	KCTD17	RefSeq_coding	1704	chr22	+	37447778	37459429		ACATCGGCCCGCTGATCCGCATCATCAAAGACCGGATGGAAGAGAAGGACTACACGGTCA	79734	Hs.517597	GO:0042802|GO:0005249|GO:0006813|GO:0016020|GO:0008076	NP_078957	Potassium channel tetramerisation domain containing 17
ASHG19A3A013372	668.085	729.968	9.29121	9.60022	coding	NM_004881	TP53I3	RefSeq_coding	1675	chr2	-	24300304	24307728		ATTTGCCTGATCCTCTTCGGCGTTGTCCTGCTCTGCCGCATCCAGCCCTGTACCGCCATC	9540	Hs.50649	GO:0070402|GO:0003960|GO:0005488|GO:0016491|GO:0042803|GO:0048038|GO:0008270|GO:0006739|GO:0008631|GO:0055114|GO:0005575	NP_671713	Tumor protein p53 inducible protein 3
ASHG19A3A028271	66.4039	78.7413	5.97494	6.37734	coding	NM_020928	ZSWIM6	RefSeq_coding	5519	chr5	+	60628099	60841998		AAATCATGGCAGTGAATTACCCAACTTAACCAATGCTCTGCCTCAGGGTGCAAATGCCAA	57688	Hs.650537	GO:0046872|GO:0008270	NP_065979	Zinc finger, SWIM-type containing 6
ASHG19A3A043403	8210.33	7701.58	12.9287	12.9835	coding	NM_014661	FAM53B	RefSeq_coding	5740	chr10	-	126307862	126432930		TCTCTCAGGAATTTGCTTGTTACTTGTACTGTGTAAATAAAGCTTCCTGGTTCAATACCC	9679	Hs.129195	GO:0003674|GO:0008150|GO:0005575	NP_055476	Family with sequence similarity 53, member B
ASHG19A3A034797	56596.5	65996.6	15.7666	16.0212	coding	NM_001008395	C7orf59	RefSeq_coding	613	chr7	+	99746529	99751833		GGAGACCTCCCTTTGTGCTCCCTCACTCCCTAATAAACATGAGTCTGATGTTCTCCAGCC	389541	Hs.406520		NP_001008396	Chromosome 7 open reading frame 59
ASHG19A3A052138	132.865	124.246	6.97205	7.03992	coding	NM_207381	TNFAIP8L3	RefSeq_coding	2292	chr15	-	51348800	51397473		CCACGTTACAAACAAGACTCATCCCCTTATCTTTTCATCTTCAGAGGGGAAAGGGACTTG	388121	Hs.306343		NP_997264	Tumor necrosis factor, alpha-induced protein 8-like 3
ASHG19A3A012095	3193.06	3952.07	11.5567	12.0211	coding	NM_152784	TMEM146	RefSeq_coding	2528	chr19	+	5720687	5778741		ATGTTCAAGTACTCAGATCACCCCCTCAACCGGAGTTTCGGGCTGTCTTTTGACTATAAT	257062	Hs.631842	GO:0016021|GO:0016020	NP_689997	Transmembrane protein 146
ASHG19A3A004685	107.405	69.7673	6.67601	6.20407	coding	NM_013942	PAX3	RefSeq_coding	1080	chr2	-	223158348	223163700		ATCGACGGCATCCTGAGCGAGCGAGGAAAGGCCCTGGTCTCCGGAGTTTCCTCGCATTAA	5077	Hs.42146	GO:0005515|GO:0043565|GO:0003700|GO:0016563|GO:0006915|GO:0007275|GO:0009887|GO:0010552|GO:0006355|GO:0007605|GO:0006366|GO:0005634	NP_852126	Paired box 3
ASHG19A3A031044	164.904	134.461	7.28231	7.15208	coding	NM_001949	E2F3	RefSeq_coding	5050	chr6	+	20402136	20493945		AACTGATCCAAAGCTGCACCCTGGACCTCAAACTGTTAACCGAGGATTCAGAGAATCAAA	1871	Hs.269408	GO:0003677|GO:0005515|GO:0003700|GO:0016563|GO:0000080|GO:0000085|GO:0000278|GO:0008284|GO:0045893|GO:0006367|GO:0005654|GO:0005654|GO:0005634|GO:0005667	NP_001940	E2F transcription factor 3
ASHG19A3A008113	36246.3	38842.1	15.0986	15.2973	coding	NM_006923	SDF2	RefSeq_coding	1075	chr17	-	26975607	26988933		TTGGCATCATGGACTGTTAATGTATGTGATTTTCCCCCTATTTTCTCTCTCCAAAATGAT	6388	Hs.514036	GO:0004169|GO:0006486|GO:0005576|GO:0005615|GO:0016020	NP_008854	Stromal cell-derived factor 2
ASHG19A3A038569	208.038	154.9	7.6168	7.35965	coding	NM_014858	TMCC2	RefSeq_coding	4021	chr1	+	205197037	205242470		TTAATAATTTAGACCCCAGGCCTCATATGAATATAAGAGGGGGTGCGGTCTTCCCCAAGA	9911	Hs.6360	GO:0016021|GO:0016020	NP_055673	Transmembrane and coiled-coil domain family 2
ASHG19A3A054840	568.911	668.898	9.0522	9.47459	coding	NM_182981	OSGIN1	RefSeq_coding	1958	chr16	+	83986826	83999938		TCCCGATCTCGCGGGGGACTCTGTGATCCGTGTTCCCCTGACCCTCCTAGTGCACAACTT	29948	Hs.128055	GO:0008083|GO:0030154|GO:0007275|GO:0030308|GO:0040008|GO:0005575	NP_892026	Oxidative stress induced growth inhibitor 1
ASHG19A3A047556	531.512	553.525	8.95925	9.20923	coding	NM_018113	LMBR1L	RefSeq_coding	2358	chr12	-	49490924	49504680		ATTGCATAATCTGAGCCAGAGTTTGGGACCAGGACCTCCTGCTTTTCCATACTTAACTGT	55716	Hs.272838	GO:0004872|GO:0006897|GO:0016021|GO:0005886	NP_060583	Limb region 1 homolog (mouse)-like
ASHG19A3A052285	976.35	2450.83	9.8426	11.3462	coding	NM_005621	S100A12	RefSeq_coding	466	chr1	-	153346183	153348075		TGAAGGCTTTTTACCCAGCAATGTCCTCAATGAGGGTCTTTTCTTTCCCTCACCAAAACC	6283	Hs.19413	GO:0050786|GO:0050786|GO:0005509|GO:0005515|GO:0008270|GO:0042742|GO:0050832|GO:0006954|GO:0045087|GO:0031640|GO:0043123|GO:0006805|GO:0005737|GO:0005829|GO:0005576|GO:0005626|GO:0005634	NP_005612	S100 calcium binding protein A12
ASHG19A3A012784	480.979	501.519	8.81657	9.06785	coding	NM_012116	CBLC	RefSeq_coding	1591	chr19	+	45281125	45303902		ATCCTGCAGACCATCCCTGCCAACAAACCCCTGTCCCAGGTGCTCCTGGAGGGACAGAAG	23624	Hs.466907	GO:0017124|GO:0005509|GO:0005154|GO:0001784|GO:0004871|GO:0004842|GO:0008270|GO:0007166|GO:0043407|GO:0007175|GO:0042059|GO:0042787|GO:0005634	NP_036248	Cas-Br-M (murine) ecotropic retroviral transforming sequence c
ASHG19A3A041536	568.888	509.171	9.05215	9.08801	coding	NM_016542	MST4	RefSeq_coding	3352	chrX	+	131157244	131209971	NM_001042453,	GAGACTTTACTAAGTCTTTTAAGGAGTTTATTGATGCTTGCCTGAACAAAGATCCATCAT	51765	Hs.444247	GO:0005524|GO:0042802|GO:0000287|GO:0000166|GO:0005515|GO:0004672|GO:0004674|GO:0006915|GO:0006921|GO:0006468|GO:0042981|GO:0005794|GO:0000139|GO:0005737|GO:0005829|GO:0016020	NP_057626	Serine/threonine protein kinase MST4
ASHG19A3A050708	69.5124	75.2452	6.0412	6.31166	coding	NM_014990	RALGAPA1	RefSeq_coding	7882	chr14	-	36007558	36278432		AATGAAGTTTTTGGTGCTTTGAATGAGGAGCAGCCATTGCCTCGAAGTAGCAGCACTTCT	253959	Hs.113150	GO:0005096|GO:0017123|GO:0046982|GO:0032859|GO:0051056|GO:0007165|GO:0005737|GO:0005737|GO:0005829|GO:0005622|GO:0005739|GO:0005634	NP_919277	Ral GTPase activating protein, alpha subunit 1 (catalytic)
ASHG19A3A010786	334.193	463.841	8.2973	8.9528	coding	NM_177543	PPAP2C	RefSeq_coding	1394	chr19	-	281045	291169		AGGAAGTCTGTGCGGAGGGGCCGCGCGCGCGCCTCCATCCCGCCCCGCCTGGCCTGGGAG	8612	Hs.465506	GO:0016787|GO:0008195|GO:0004721|GO:0042392|GO:0006665|GO:0016021|GO:0016020|GO:0005886	NP_808211	Phosphatidic acid phosphatase type 2C
ASHG19A3A042769	37194.7	42084.7	15.1387	15.3952	coding	NM_023009	MARCKSL1	RefSeq_coding	1584	chr1	-	32799440	32801834		AAACCATTCTCTTCCACCTGGTTTTACTGTAACATTTGGAAAAGGAATAAATGTCGTCCC	65108	Hs.75061	GO:0005516|GO:0008284|GO:0016192|GO:0005886	NP_075385	MARCKS-like 1
ASHG19A3A021293	408.301	366.615	8.58034	8.61499	coding	NM_000158	GBE1	RefSeq_coding	3118	chr3	-	81538849	81810950		TGGAGCATGCTTACTATGCCAGCTTTGGTTACCAAATCACAAGCTTCTTTGCAGCTTCCA	2632	Hs.436062	GO:0003844|GO:0043169|GO:0004553|GO:0016757|GO:0005975|GO:0006091|GO:0006006|GO:0005978|GO:0005977|GO:0005829	NP_000149	Glucan (1,4-alpha-), branching enzyme 1
ASHG19A3A031717	645.82	652.205	9.24237	9.43994	coding	NM_001160130	KCNQ5	RefSeq_coding	6568	chr6	+	73331570	73908571		AGTGTGATGTATCAGTGGAAGACCTCACCCCACCACTTAAAACTGTCATTCGAGCTATCA	56479	Hs.445324	GO:0005242|GO:0005244|GO:0006811|GO:0006813|GO:0006461|GO:0007268|GO:0055085|GO:0016021|GO:0005886|GO:0008076	NP_062816	Potassium voltage-gated channel, KQT-like subfamily, member 5
ASHG19A3A000970	1104.24	1051.89	10.0253	10.1202	coding	NM_001012751	ABI1	RefSeq_coding	3557	chr10	-	27035526	27150016	NM_001012750,	CCTTCGCCACCCACTATTGGACCAGCAGCCCCGGGCTCAGCTCCTGGTTCCCAGTATGGC	10006	Hs.508148	GO:0008092|GO:0005515|GO:0030296|GO:0008154|GO:0006928|GO:0008285|GO:0018108|GO:0001756|GO:0007169|GO:0030054|GO:0005737|GO:0005856|GO:0005829|GO:0005783|GO:0030175|GO:0030426|GO:0005622|GO:0030027|GO:0005634|GO:0005625|GO:0045202|GO:0019717	NP_005461	Abl-interactor 1
ASHG19A3A004858	954.25	292.94	9.80864	8.28162	coding	NM_015938	NMD3	RefSeq_coding	2758	chr3	+	160939098	160969795		TCCAGGGCTGGTCTGGAGGCGCGAAAACTTAAGGCATACAGAACGATGGAGTATATGGCA	51068	Hs.598836	GO:0015031|GO:0005737|GO:0005730|GO:0005654|GO:0005634	NP_057022	NMD3 homolog (S. cerevisiae)
ASHG19A3A037358	119.923	101.741	6.82689	6.74287	coding	NM_003028	SHB	RefSeq_coding	6021	chr9	-	37915895	38069210		AGCCGATGACTACTCAGATCCCTTTGATGCCAAGAATGATCTCAAGAGCAAAGCAGGAAA	6461	Hs.521482	GO:0005070|GO:0001948|GO:0042100|GO:0001525|GO:0006915|GO:0030154|GO:0007275|GO:0007165|GO:0005737|GO:0005886	NP_003019	Src homology 2 domain containing adaptor protein B
ASHG19A3A054353	187.249	122.752	7.46433	7.02316	coding	NM_005622	ACSM3	RefSeq_coding	2158	chr16	+	20775311	20808478		ATTTGAGGTAGAAAATGCCCTGAATGAACACCCTTCAGTTGCAGAGTCAGCTGTTGTCAG	6296	Hs.706754	GO:0005524|GO:0047760|GO:0016874|GO:0046872|GO:0003674|GO:0000166|GO:0006631|GO:0006629|GO:0008217|GO:0005575|GO:0005759|GO:0005739	NP_973729	Acyl-CoA synthetase medium-chain family member 3
ASHG19A3A031408	527.405	268.417	8.94813	8.15382	coding	NM_014357	LCE2B	RefSeq_coding	619	chr1	+	152658598	152659874		TGCAGGTTTTGTTTTCCTCCTTTACCTCATGTTATAATAAAGCTCTGATTTCTGACTCAC	26239	Hs.234766	GO:0003674|GO:0008544|GO:0031424|GO:0005575	NP_055172	Late cornified envelope 2B
ASHG19A3A006495	169.062	145.249	7.31595	7.26506	coding	NM_178273	PILRA	RefSeq_coding	1070	chr7	+	99971067	99997722		TCGAGGGGACCAAACTCTCCATCACCCAGGGGAACCCTTCCAAAACACAGAGGAGCCATA	29992	Hs.444407	GO:0005515|GO:0004872|GO:0044419|GO:0007165|GO:0005576|GO:0016021|GO:0005886	NP_840057	Paired immunoglobin-like type 2 receptor alpha
ASHG19A3A017950	393.371	273.315	8.52916	8.18042	coding	NM_006943	SOX12	RefSeq_coding	4645	chr20	+	306238	310865		ATGGTATAAACACCTGGTCATTTCAATCCAACATGGGACGGACACTGACAGACAGTACTC	6666	Hs.43627	GO:0003677|GO:0003702|GO:0045165|GO:0006357|GO:0005575|GO:0005634	NP_008874	SRY (sex determining region Y)-box 12
ASHG19A3A050648	6444.9	5239.64	12.5716	12.4389	coding	NM_138476	MDP1	RefSeq_coding	731	chr14	-	24683159	24685241		TCTCCCAGATGATCTTCTTTGATGATGAGAGGCGGAATATTGTAGACGTCAGCAAACTGG	145553	Hs.220963	GO:0016787|GO:0046872|GO:0004725	NP_612485	Magnesium-dependent phosphatase 1
ASHG19A3A021669	1012.24	859.531	9.89922	9.8364	coding	NM_002899	RBP1	RefSeq_coding	916	chr3	-	139236275	139258671		TCACTTTTCCTTTTCTTAAAACAAAGCCATGCCAATAAAGTGATCTGTGTTCAAAACGTC	5947	Hs.529571	GO:0008289|GO:0016918|GO:0005501|GO:0019841|GO:0005215|GO:0030852|GO:0033189|GO:0042573|GO:0042572|GO:0006776|GO:0005737	NP_002890	Retinol binding protein 1, cellular
ASHG19A3A003830	69.3072	94.266	6.03662	6.63169	coding	NM_001178086	ZFX	RefSeq_coding	6801	chrX	+	24167761	24234372		CGCCGGCCGCCCGCACGTCCGTCCGTGGATGATGCTGGCAAAATAGAACACGATGGTTCT	7543	Hs.336681	GO:0003677|GO:0046872|GO:0003713|GO:0030528|GO:0008270|GO:0005622|GO:0005730|GO:0005634	NP_003401	Zinc finger protein, X-linked
ASHG19A3A004368	1814.62	1654.86	10.7391	10.7797	coding	NM_005102	FEZ2	RefSeq_coding	2043	chr2	-	36779403	36825332		AATGAGAGAAGTCATATGCCCGGCACATATTTGACTACAGTCATTCCTTATGAGAAAAAA	9637	Hs.258563	GO:0005515|GO:0007411|GO:0007399|GO:0007165	NP_005093	Fasciculation and elongation protein zeta 2 (zygin II)
ASHG19A3A006628	340.614	329.752	8.32177	8.45527	coding	NM_182720	CREM	RefSeq_coding	1955	chr10	+	35484054	35501885	NM_182718,	ATGGCTGTAACTGGAGATGACACAGCTGCCACTGGTGACATGCCAACTTACCAGATCCGA	1390	Hs.200250	GO:0003677|GO:0008140|GO:0005515|GO:0046983|GO:0043565|GO:0003700|GO:0030154|GO:0007275|GO:0006355|GO:0006355|GO:0007165|GO:0007283|GO:0005634	NP_898883	CAMP responsive element modulator
ASHG19A3A051807	1877.16	1481.19	10.7898	10.6189	coding	NM_021960	MCL1	RefSeq_coding	4020	chr1	-	150547036	150552136		AAGTATCACAGACGTTCTCGTAAGGACAAAACGGGACTGGCTAGTTAAACAAAGAGGCTG	4170	Hs.632486	GO:0005515|GO:0015266|GO:0046982|GO:0006916|GO:0006915|GO:0030154|GO:0001709|GO:0019725|GO:0007275|GO:0034097|GO:0005737|GO:0016021|GO:0016020|GO:0005741|GO:0005739|GO:0005654|GO:0005634	NP_877495	Myeloid cell leukemia sequence 1 (BCL2-related)
ASHG19A3A000644	2028.94	2303.48	10.8973	11.2598	coding	NM_000995	RPL34	RefSeq_coding	918	chr4	+	109541721	109551637		TTTTTTCTTCCTCTTCCGGGGACGTTGTCTGCAGGCACTCAGAATGGTCCAGCGTTTGAC	6164	Hs.438227	GO:0003723|GO:0005515|GO:0003735|GO:0044267|GO:0031018|GO:0010467|GO:0006412|GO:0006414|GO:0006415|GO:0019058|GO:0016032|GO:0019083|GO:0005829|GO:0005829|GO:0022625|GO:0005622|GO:0005840	NP_296374	Ribosomal protein L34
ASHG19A3A046143	97.3117	102.347	6.53376	6.75274	coding	NM_001172430	AMPD3	RefSeq_coding	4298	chr11	+	10482677	10529126		AGCTAATTTTGAAATTGGCATGCTGGGTTTGGTCTGGGGCATTCCTAAGTAGACAGCTGA	272	Hs.501890	GO:0003876|GO:0016787|GO:0046872|GO:0006196|GO:0055086|GO:0009117|GO:0006144|GO:0009168|GO:0043101|GO:0005829	NP_001165902	Adenosine monophosphate deaminase 3
ASHG19A3A051010	182.86	167.944	7.43197	7.47616	coding	NM_138791	C14orf148	RefSeq_coding	753	chr14	-	77872997	77889232		GCTCAACATATTTCTGGCATTCTTTTGAAAATTACTTTCCTGTTGGCCCATTGCTATCTT	122945	Hs.97556	GO:0005488|GO:0016491|GO:0004735|GO:0055114|GO:0006561	NP_001106946	Chromosome 14 open reading frame 148
ASHG19A3A050904	2539.38	2710.12	11.22	11.4884	coding	NM_207418	FAM72D	RefSeq_coding	2393	chr1	-	143896451	143913143	NM_001123168,NM_001100910,	GACACTTCTGGATGTTTCACAGCCAGGCAGTTTATGATATTAACAGACTAGACTCCACAG	728833	Hs.535577		NP_997301	Family with sequence similarity 72, member D
ASHG19A3A004477	271.777	270.968	8.00419	8.16835	coding	NM_006230	POLD2	RefSeq_coding	1616	chr7	-	44154286	44163147		TTGGCGGGATGCGGCGCGCCGCGCGTGAACCTCCTTGGCCTGGGCGAAGCTGTGTGGACC	5425	Hs.306791	GO:0003677|GO:0003887|GO:0016779|GO:0005515|GO:0016740|GO:0006281|GO:0006260|GO:0006271|GO:0000084|GO:0006284|GO:0000278|GO:0006289|GO:0006297|GO:0000723|GO:0000722|GO:0032201|GO:0006283|GO:0005654|GO:0005654|GO:0005634	NP_006221	Polymerase (DNA directed), delta 2, regulatory subunit 50kDa
ASHG19A3A033334	22965.6	21943.6	14.4098	14.4952	coding	NM_003768	PEA15	RefSeq_coding	2474	chr1	+	160175124	160185160		TTCTGTCTGCAGTGTGCACGGCCTTGTTCTAACCCGGAATAAAGGTGATTGATTGTATTG	8682	Hs.517216	GO:0005515|GO:0006916|GO:0008643|GO:0046325|GO:0042981|GO:0043278|GO:0006810|GO:0005737|GO:0005875	NP_003759	Phosphoprotein enriched in astrocytes 15
ASHG19A3A038753	106.497	110.192	6.66249	6.86153	coding	NM_001170416	TJP2	RefSeq_coding	4500	chr9	+	71820077	71870124		CCCCTTGTTTTCCCCAACCTTTCTTCATGGGAAGGGGAGGGAAGCAAAACCATTCTCACA	9414	Hs.50382	GO:0004385|GO:0005515|GO:0006915|GO:0006921|GO:0005912|GO:0030054|GO:0005737|GO:0005634|GO:0005886|GO:0005886|GO:0005923	NP_963923	Tight junction protein 2 (zona occludens 2)
ASHG19A3A007854	89.0454	70.4711	6.39981	6.21762	coding	NM_004860	FXR2	RefSeq_coding	3016	chr17	-	7494547	7518215		AAGAAAGCCCTGGGAGCCAACTGCATCTTTCTCAACATCACAAACAGTGAGCTCTTCATT	9513	Hs.52788	GO:0003723|GO:0005515|GO:0005737|GO:0022625	NP_004851	Fragile X mental retardation, autosomal homolog 2
ASHG19A3A022227	220.828	209.765	7.70389	7.79818	coding	NM_001080517	SETD5	RefSeq_coding	6827	chr3	+	9439402	9519836		ATTAATTGGACCCCGTGATTTCCAATCTCTGCTGTGTTGGACGTCATGAGCATTGCAATC	55209	Hs.288164		NP_001073986	SET domain containing 5
ASHG19A3A010355	144.829	131.992	7.09338	7.12696	coding	NM_176787	PIGN	RefSeq_coding	4893	chr18	-	59711459	59854289		CAAATTACACACTGGCTTGGAAAGTACTCCCATGTTCCGTTTGATCTTGGCAATTTAATG	23556	Hs.157031	GO:0016780|GO:0016740|GO:0006501|GO:0044267|GO:0043687|GO:0016254|GO:0005783|GO:0005789|GO:0016021|GO:0016020	NP_789744	Phosphatidylinositol glycan anchor biosynthesis, class N
ASHG19A3A049919	79.0344	70.5023	6.22551	6.21828	coding	NM_001010922	BCL2L15	RefSeq_coding	4986	chr1	-	114419436	114430169		AAACGGAATGCATTGTGAACACTCTACTCATGGACTTCTTGAGCCCAACATTGCAGGTTG	440603	Hs.123106	GO:0006915|GO:0005829|GO:0005634	NP_001010922	BCL2-like 15
ASHG19A3A047740	173.412	97.3499	7.35403	6.67601	coding	NM_005730	CTDSP2	RefSeq_coding	5038	chr12	-	58213711	58240747		TCAAGGAAGGATCTGTGTGGTCATTGACCTCGATGAAACCCTTGTGCATAGCTCCTTTAA	10106	Hs.524530	GO:0008420|GO:0016787|GO:0046872|GO:0004721|GO:0006470|GO:0005634|GO:0005625	NP_005721	CTD (carboxy-terminal domain, RNA polymerase II, polypeptide A) small phosphatase 2
ASHG19A3A006173	289.119	218.213	8.0915	7.85578	coding	NM_152832	FAM89B	RefSeq_coding	1428	chr11	+	65339819	65341669		GCTGGCCGCGCTGCGCAAGGAGATGCTGTGGGGCCTGTACGAGTCAATCCAGGACTACAA	23625	Hs.25723		NP_690045	Family with sequence similarity 89, member B
ASHG19A3A048543	143.584	158.037	7.08037	7.38843	coding	NM_001013635	C12orf68	RefSeq_coding	2380	chr12	+	48577365	48579709		TGTGTATTCCTTCTCAATGCTTTCCTTGGTGTTAACCTTAATAAAAAGGCGTCATCTCCC	387856	Hs.251699	GO:0005737	NP_001013657	Chromosome 12 open reading frame 68
ASHG19A3A046416	131.865	144.848	6.96209	7.26009	coding	NM_000062	SERPING1	RefSeq_coding	1984	chr11	+	57365026	57382326		GACCCTGGGGGACTCTCTACTCAGTCTGCACTGGAGCTGCCTGGTGACCAGAAGTTTGGA	710	Hs.384598	GO:0030414|GO:0005515|GO:0004867|GO:0008015|GO:0007596|GO:0007597|GO:0006958|GO:0045087|GO:0001869|GO:0010951|GO:0030168|GO:0002576|GO:0005576|GO:0005576|GO:0005615|GO:0031093	NP_001027466	Serpin peptidase inhibitor, clade G (C1 inhibitor), member 1
ASHG19A3A018127	113.302	133.677	6.74886	7.14373	coding	NM_001052	SSTR4	RefSeq_coding	1258	chr20	+	23016056	23017314		TTTCTACGTGGTGCAGCTGCTGAACCTCTTCGTGACCAGCCTTGATGCCACCGTCAACCA	6754	Hs.673846	GO:0004930|GO:0004872|GO:0004994|GO:0007186|GO:0007187|GO:0008285|GO:0005887|GO:0005886|GO:0005886	NP_001043	Somatostatin receptor 4
ASHG19A3A017715	135.95	158.495	7.00436	7.39295	coding	NM_181502	SPINLW1	RefSeq_coding	2445	chr20	-	44169266	44175016		AAGCAAACTGAAAGCAAACTTCCCTGACTCTCTAGAATTGCCTTGTGTCTGGCAAAGTGG
ASHG19A3A052242	208.868	187.583	7.62303	7.63332	coding	NM_001218	CA12	RefSeq_coding	3992	chr15	-	63615730	63674075		ATTGTCCATTATAACTCAGACCTTTATCCTGACGCCAGCACTGCCAGCAACAAGTCAGAA	771	Hs.210995	GO:0004089|GO:0016829|GO:0046872|GO:0008270|GO:0006730|GO:0016021|GO:0016020	NP_996808	Carbonic anhydrase XII
ASHG19A3A007393	5824.29	6967.44	12.4246	12.8438	coding	NM_001779	CD58	RefSeq_coding	1153	chr1	-	117057156	117113715	NR_026665,	GTGACAGAAAACCAGACAGAACCAACTCCAATTGATTGGTAACAGAAGATGAAGACAACA	965	Hs.34341	GO:0005515|GO:0007596|GO:0007155|GO:0016337|GO:0050900|GO:0031225|GO:0005887|GO:0005886	NP_001770	CD58 molecule
ASHG19A3A014517	94.4143	116.865	6.48785	6.9485	coding	NM_004288	CYTIP	RefSeq_coding	2282	chr2	-	158271130	158300604		ATCAGAATGCCTGCTCCTCGGAAATGTTCACTTTGATATGCAAAATACAGGAGGACAGCC	9595	Hs.270	GO:0005515|GO:0030155|GO:0005938|GO:0005737|GO:0005769	NP_004279	Cytohesin 1 interacting protein
ASHG19A3A021065	673.03	718.89	9.30179	9.57685	coding	NM_003363	USP4	RefSeq_coding	4120	chr3	-	49314576	49377536		AATCATCAGCAAGTCCCTATTCCTCAGTGTCTGCCTCTCTCATTGCAAATGGTGATAGCA	7375	Hs.77500	GO:0031685|GO:0008234|GO:0008233|GO:0005515|GO:0004221|GO:0004843|GO:0031397|GO:0016579|GO:0034394|GO:0031647|GO:0006511|GO:0005737|GO:0005764|GO:0005634	NP_955475	Ubiquitin specific peptidase 4 (proto-oncogene)
ASHG19A3A003169	80.7609	84.2909	6.25645	6.47187	coding	NM_001163523	ITPRIPL1	RefSeq_coding	1947	chr2	+	96991068	96994090		CTCTTTAAGATCGTGTTCCTACTAACACTGACGATGCAGAGGCCTCCATGGCTGTGATAA	150771	Hs.65009	GO:0016021|GO:0016020	NP_848590	Inositol 1,4,5-triphosphate receptor interacting protein-like 1
ASHG19A3A034281	62.7206	122.912	5.89152	7.02508	coding	NM_001029835	CCM2	RefSeq_coding	1892	chr7	+	45067232	45116068		AATCTCTCCAAAGAAATTCCTCAAACAGAATTTCACACAGGGTATTCCATGGAGAATGAG	83605	Hs.148272	GO:0005515|GO:0061154|GO:0007229|GO:0051403|GO:0001570|GO:0005737	NP_113631	Cerebral cavernous malformation 2
ASHG19A3A003879	57.4106	110.719	5.75723	6.8685	coding	NM_001223	CASP1	RefSeq_coding	1301	chr11	-	104896245	104972158	NM_001017534,	GCAGGGACGCTGGGACTCTCAGCAGCTCCTCAGGCAGTGCAGGACAACCCAGCTATGCCC	834	Hs.2490	GO:0008656|GO:0004197|GO:0008233|GO:0005515|GO:0006915|GO:0071260|GO:0043123|GO:0006508|GO:0042981|GO:0007165|GO:0005737|GO:0005829|GO:0005829|GO:0005622	NP_150637	Caspase 1, apoptosis-related cysteine peptidase (interleukin 1, beta, convertase)
ASHG19A3A054211	18407.4	9180.9	14.0996	13.2404	coding	NM_145252	ZG16B	RefSeq_coding	846	chr16	+	2880172	2882284		ACTGAGTCGGGACGCTGAATCTGAATCCACCAATAAATAAAGGTTCTGCAGAATCAGTGC	124220	Hs.105887	GO:0005529|GO:0005576	NP_660295	Zymogen granule protein 16 homolog B (rat)
ASHG19A3A002435	83.8526	132.207	6.31166	7.12951	coding	NM_001136473	LITAF	RefSeq_coding	2577	chr16	-	11641581	11680806		CCTGCGGGAGCCTGTGCCTGCTGGGGCAGGAGTGCAGTGGTACGATCGTAGCTCTCCGCA	9516	Hs.459940	GO:0003702|GO:0050699|GO:0004871|GO:0006915|GO:0043123|GO:0006357|GO:0007165|GO:0005794|GO:0005765|GO:0016020	NP_004853	Lipopolysaccharide-induced TNF factor
ASHG19A3A001661	146.785	201.635	7.11495	7.7405	coding	NM_001098210	CTNNB1	RefSeq_coding	3256	chr3	+	41240941	41281939		TACTGACCTGTAAATCATCCTTTAGGAGTAACAATACAAATGGATTTTGGGAGTGACTCA	1499	Hs.476018	GO:0070411|GO:0070412|GO:0042153|GO:0046332|GO:0045294|GO:0050681|GO:0045296|GO:0019899|GO:0030331|GO:0044325|GO:0019900|GO:0035257|GO:0035257|GO:0010843|GO:0008022|GO:0005515|GO:0019901|GO:0019903|GO:0004871|GO:0003704|GO:0005198|GO:0003713|GO:0003713|GO:0008134|GO:0008134|GO:0016564|GO:0014010|GO:0033077|GO:0016055|GO:0034333|GO:0030521|GO:0006915|GO:0001658|GO:0060070|GO:0044336|GO:0044334|GO:…	NP_001895	Catenin (cadherin-associated protein), beta 1, 88kDa
ASHG19A3A049440	87.0175	79.0259	6.36337	6.38143	coding	NM_001142295	SPG20	RefSeq_coding	4962	chr13	-	36875776	36920934		AGTGTTACGGTGACTCTTGGGTCCGAAGGGGACGGACGTCCTCCCACGTACCATTTAGAA	23111	Hs.440414	GO:0031625|GO:0008219|GO:0005737	NP_055902	Spastic paraplegia 20 (Troyer syndrome)
ASHG19A3A051811	4261.95	3279.2	11.9841	11.7534	coding	NM_181291	WDR20	RefSeq_coding	2597	chr14	+	102606211	102690009		GTGAAGATGCCCTTTTTACCCGTTGACGTTTATTTTACGTAAAATAAACTGTTGTTTCCA	91833	Hs.36859		NP_851825	WD repeat domain 20
ASHG19A3A004164	1696.7	1446.78	10.6465	10.5866	coding	NM_003583	DYRK2	RefSeq_coding	6010	chr12	+	68042511	68056443		GCCGCTCCCGCCGCCTACCCGACCGATTGGCGGCAGTAAGCACACAATGAATGATCACCT	8445	Hs.173135	GO:0005524|GO:0000287|GO:0030145|GO:0000166|GO:0004672|GO:0004674|GO:0004713|GO:0016740|GO:0042771|GO:0006915|GO:0045725|GO:0006468|GO:0005737|GO:0043231|GO:0005730|GO:0005634	NP_006473	Dual-specificity tyrosine-(Y)-phosphorylation regulated kinase 2
ASHG19A3A050410	267.948	94.3365	7.98474	6.63347	coding	NM_001001715	FARP1	RefSeq_coding	1321	chr13	+	98795433	98897556		CCTGAAAGGGTTTAGTTTTTAAAAGGAGTACCTCATTTACCATATTACTGTGTTCTGAGA	10160	Hs.403917	GO:0005089|GO:0005488|GO:0008092|GO:0005085|GO:0035023|GO:0005737|GO:0005856|GO:0019898|GO:0005622	NP_005757	FERM, RhoGEF (ARHGEF) and pleckstrin domain protein 1 (chondrocyte-derived)
ASHG19A3A048006	4056.92	2418.42	11.9077	11.3262	coding	NM_001137664	ANAPC7	RefSeq_coding	2224	chr12	-	110813273	110841535		TTGTAAGTACTTTCCCATGTTTCTATCTACTGTAGTCATTAAGAACTTGAGGTCTGAAGT	51434	Hs.719935	GO:0005488|GO:0031145|GO:0031145|GO:0000075|GO:0051301|GO:0007067|GO:0000278|GO:0007094|GO:0051436|GO:0051437|GO:0070979|GO:0051439|GO:0005680|GO:0005829|GO:0005829|GO:0005654|GO:0005654	NP_057322	Anaphase promoting complex subunit 7
ASHG19A3A001112	385.121	335.769	8.50067	8.48063	coding	NM_001024957	BRMS1	RefSeq_coding	1360	chr11	-	66104803	66112582		TGTGTCCCCTCAGAAGAGAAAATCGGATGACAGGCGGACCCACAGGCCCCTCAGGGTCTG	25855	Hs.100426	GO:0051059|GO:0005515|GO:0006915|GO:0032088|GO:0019987|GO:2000210|GO:0090312|GO:0005737|GO:0005634	NP_056214	Breast cancer metastasis suppressor 1
ASHG19A3A046511	22220.8	19695.7	14.3588	14.3481	coding	NM_001085372	C11orf83	RefSeq_coding	658	chr11	+	62439125	62439850		GAGACGCGAGTCGGATGTGGTGAACTGAAAGAACCAATAAAATCATGTTCCTCCACCCAG	790955	Hs.569009	GO:0005576	NP_001078841	Chromosome 11 open reading frame 83
CUST_4_PI418767722	115913	120352	16.8444	16.8536	coding	NM_006098	GNB2L1	RefSeq_coding	1125	chr5	-	180663927	180670906		TGTGGCAGGTGACCATTGGCACACGCTAGAAGTTTATGGCAGAGCTTTACAAATAAAAAA	10399	Hs.5662	GO:0005515|GO:0019903|GO:0005102|GO:0005737|GO:0030496|GO:0043025|GO:0005886	NP_006089	Guanine nucleotide binding protein (G protein), beta polypeptide 2-like 1
ASHG19A3A002604	558.739	400.045	9.02808	8.73726	coding	NM_001142762	C15orf23	RefSeq_coding	1701	chr15	+	40674921	40686488		AATTTTGGAGAGCAAGGGCCTTGATCCAGTTGCTGTTAGAAACTTTGCAAGAGGAGCTGA	90417	Hs.525796	GO:0005515|GO:0005634	NP_150628	Chromosome 15 open reading frame 23
CUST_17_PI418767722	42692	38468.5	15.3375	15.2836	coding	NM_003753	EIF3D	RefSeq_coding	1949	chr22	-	36906897	36925277		GATGCTTAGTGGAATGTGTGTCTAACTTGCTCTCTGACATTTAGCAGATGAAATAAAATA	8664	Hs.55682	GO:0005515|GO:0003743|GO:0003743|GO:0044267|GO:0001732|GO:0010467|GO:0006412|GO:0006413|GO:0006413|GO:0005737|GO:0005829|GO:0005829|GO:0005852	NP_003744	Eukaryotic translation initiation factor 3, subunit D
ASHG19A3A011661	1758.45	1703.47	10.6976	10.8208	coding	NM_001130915	MAMSTR	RefSeq_coding	1579	chr19	-	49216254	49222976		CAATGACCCTGGCGGCTTCCTCCCAGCGTTCCCAAATCATTCGCTCCAAGTTCCGATCTG	284358	Hs.191815	GO:0003676|GO:0005634	NP_872380	MEF2 activating motif and SAP domain containing transcriptional regulator
ASHG19A3A041736	6524.88	6437.2	12.5891	12.7299	coding	NM_001170760	SRPK3	RefSeq_coding	1999	chrX	+	153046455	153051186		GCCTCTTCCTCCCCCGCCCCAGGGGGCGGCCGTAGCCTCAGCGCGGGCTCACAGACCTCA	26576	Hs.104865	GO:0005524|GO:0000166|GO:0004674|GO:0016740|GO:0030154|GO:0007275|GO:0007517|GO:0060537|GO:0006468|GO:0005575	NP_055185	SRSF protein kinase 3
ASHG19A3A046260	69.7589	130.017	6.04581	7.1066	coding	NM_033467	MMEL1	RefSeq_coding	2902	chr1	-	2522080	2564481		TTCATACAAACTGTGCTATCCTCTGTCAAAATCAAGCTGCTGCCAGATGAGGAAGTGGTG	79258	Hs.591453	GO:0046872|GO:0004222|GO:0008233|GO:0006508|GO:0005576|GO:0016021|GO:0043231|GO:0016020	NP_258428	Membrane metallo-endopeptidase-like 1
ASHG19A3A040554	3752.8	3176.19	11.7981	11.7068	coding	NM_017518	HAUS7	RefSeq_coding	1892	chrX	-	152713123	152736603	AK125219,	ATGAACTAATGGAGAAATAGAAAGTCTTCAGTGATGGCCTACGCCAAAGCACAGGATGGG	55559	Hs.170835	GO:0005515|GO:0031996|GO:0031996|GO:0007049|GO:0051301|GO:0051297|GO:0007067|GO:0051225|GO:0070652|GO:0005813|GO:0005737|GO:0005856|GO:0005874|GO:0005730|GO:0005886|GO:0005819	NP_059988	HAUS augmin-like complex, subunit 7
ASHG19A3A053618	390.266	398.297	8.51786	8.72882	coding	NM_003039	SLC2A5	RefSeq_coding	2454	chr1	-	9097006	9129887	NR_024180,NM_001135585,	TGCCTTTGGGTCATCCTTCCAGTATGGGTACAACGTGGCTGCTGTCAACTCCCCAGCACT	6518	Hs.530003	GO:0005353|GO:0005355|GO:0022891|GO:0005975|GO:0008643|GO:0015755|GO:0015758|GO:0008645|GO:0055085|GO:0016021|GO:0005886	NP_003030	Solute carrier family 2 (facilitated glucose/fructose transporter), member 5
ASHG19A3A015424	209.155	166.442	7.62542	7.4627	coding	NM_002246	KCNK3	RefSeq_coding	3978	chr2	+	26915580	26954066		CTGCCTATCTGTCTTCACACTGAGAATGGCGCCCAATAAATGCTATCCACGGAGACCAGG	3777	Hs.645288	GO:0005252|GO:0005267|GO:0008022|GO:0046982|GO:0042803|GO:0005244|GO:0007420|GO:0071456|GO:0071294|GO:0090102|GO:0006811|GO:0071805|GO:0006813|GO:0051481|GO:0042493|GO:0007268|GO:0005887|GO:0005886	NP_002237	Potassium channel, subfamily K, member 3
ASHG19A3A004775	214.657	327.889	7.66333	8.44694	coding	NM_014888	FAM3C	RefSeq_coding	2552	chr7	-	120988906	121036422		CGGCGGAGAGGCGGGCGGGAGGCCGGAGCATATTAATGAAAAGTGCCATAAACTGAAAAA	10447	Hs.434053	GO:0005125|GO:0008150|GO:0007275|GO:0016023|GO:0005576	NP_055703	Family with sequence similarity 3, member C
ASHG19A3A012893	100347	108129	16.6219	16.7125	coding	NM_012423	RPL13A	RefSeq_coding	1142	chr19	+	49990864	49995562		ACAGGCATCGCCCATGCTCCTCACCTGTATTTTGTAATCAGAAATAAATTGCTTTTAAAG	23521	Hs.523185	GO:0003735|GO:0044267|GO:0031018|GO:0010467|GO:0006412|GO:0006414|GO:0006415|GO:0019058|GO:0016032|GO:0019083|GO:0005829|GO:0005829|GO:0015934|GO:0030529	NP_036555	Ribosomal protein L13a
ASHG19A3A021514	3198.75	2211.91	11.5606	11.2023	coding	NM_017836	SLC41A3	RefSeq_coding	2349	chr3	-	125725200	125803134	NM_001164475,NM_001008487,	AGAAGGTAAAGAAGAGGCATGTCCAGTATGCTTTGCAGGGTGTGTTTGCTCTTTTCCATG	54946	Hs.573007	GO:0008324|GO:0016021|GO:0005886	NP_060306	Solute carrier family 41, member 3
ASHG19A3A035026	334.685	226.784	8.29943	7.9072	coding	NM_013332	C7orf68	RefSeq_coding	1432	chr7	+	128095883	128098471		AGTTTTGTGGCGGGAAGCTTCTGCGCTGGTGCTTAGTAACCGACTTTCCTCCGGACTCCT	29923	Hs.706124	GO:0005102|GO:0035425|GO:0008284|GO:0006950|GO:0009986|GO:0005615|GO:0016021|GO:0016020|GO:0030141	NP_037464	Chromosome 7 open reading frame 68
ASHG19A3A031045	6671.04	6022.44	12.6194	12.6388	coding	NM_002810	PSMD4	RefSeq_coding	1332	chr1	+	151227196	151239952	NR_002319,ENST00000480546,	ATCCTGTCCAAGCTACATACTGTCCAACCCAAGGGCAAGATCACCTTCTGCACGGGCATC	5710	Hs.505059	GO:0005515|GO:0008270|GO:0006977|GO:0006281|GO:0000082|GO:0000216|GO:0016070|GO:0000084|GO:0031145|GO:0031145|GO:0006915|GO:0000075|GO:0034641|GO:0016071|GO:0000278|GO:0051436|GO:0051437|GO:0042981|GO:0006521|GO:0051439|GO:0016032|GO:0000502	NP_002801	Proteasome (prosome, macropain) 26S subunit, non-ATPase, 4
ASHG19A3A029208	94.4493	139.324	6.4885	7.20418	coding	NM_001171976	CDHR2	RefSeq_coding	4313	chr5	+	175969511	176022769		AGCTTAGTGGCTTTCAGGCAACGGAAGCTGTGTGACCTTGGGCAAGACACGGACTCTCTC	54825	Hs.4205	GO:0005509|GO:0005515|GO:0007155|GO:0007156|GO:0030308|GO:0016324|GO:0030054|GO:0016021|GO:0005886	NP_060145	Cadherin-related family member 2
ASHG19A3A044334	3104.44	2905.19	11.5192	11.585	coding	NM_001134375	CCNJ	RefSeq_coding	4153	chr10	+	97803158	97820623		GCAAATAGCAAGTATGGTGCTAAAGTCTACACCAATGGAATTAGATGAGTGCTATGCACT	54619	Hs.596479	GO:0005634	NP_061957	Cyclin J
ASHG19A3A022606	414.675	379.547	8.60005	8.66041	coding	NM_199069	NDUFAF3	RefSeq_coding	1387	chr3	+	49059073	49060924		GCTACGTAGCTTGTACCGAGCGCGACCCTCGCTGCGCTGTCCGCCCGTTGAGCTTCCCTG	25915	Hs.31387	GO:0005515|GO:0032981|GO:0016020|GO:0005743|GO:0005739|GO:0005634	NP_951056	NADH dehydrogenase (ubiquinone) 1 alpha subcomplex, assembly factor 3
ASHG19A3A005947	1211.79	1279.77	10.159	10.4098	coding	NM_139322	ATRN	RefSeq_coding	3967	chr20	+	3451664	3596550		AATTTCACCTGGCCCATCAAAATTCAGGTGCAAACTGAACAATGAGGACGCATGGACACA	8455	Hs.276252	GO:0005488|GO:0004872|GO:0005529|GO:0006954|GO:0040014|GO:0006979|GO:0005737|GO:0005576|GO:0005615|GO:0005887|GO:0005886	NP_647538	Attractin
ASHG19A3A004121	193.736	215.439	7.51425	7.83581	coding	NM_003256	TIMP4	RefSeq_coding	1463	chr3	-	12194572	12200647		ATCATCACTACCATCTGAACTGTGGCTGCCAAATCACCACCTGCTACACAGTACCCTGTA	7079	Hs.591665	GO:0004857|GO:0046872|GO:0008191|GO:0008150|GO:0007417|GO:0042698|GO:0034097|GO:0042493|GO:0032496|GO:0043434|GO:0005576|GO:0005615|GO:0005578|GO:0030017	NP_003247	TIMP metallopeptidase inhibitor 4
ASHG19A3A032338	500.516	373.628	8.87	8.63824	coding	NM_033657	DAP3	RefSeq_coding	1650	chr1	+	155658873	155708317	NR_027023,ENST00000452809,	TGGACCGACACGGGTATTGTACCGCTGAGGGAAAGGAGCGGGACTCCGGACCTCCAGGAG	7818	Hs.516746	GO:0005515|GO:0008637|GO:0008624|GO:0005761|GO:0005739|GO:0005730|GO:0005730|GO:0005634|GO:0015935	NP_387506	Death associated protein 3
ASHG19A3A043245	4428.36	4647.54	12.0377	12.2596	coding	NM_005029	PITX3	RefSeq_coding	1407	chr10	-	103989945	104001231		TCTCCAGGCTTCCCCTCCCTCGTTTTCAAAGATAAATGAAATAAACGTGCGCGGACTGTC	5309	Hs.137568	GO:0043565|GO:0003700|GO:0016563|GO:0071542|GO:0002088|GO:0002089|GO:0007626|GO:0030901|GO:0007275|GO:0048666|GO:0009887|GO:0006355|GO:0005634	NP_005020	Paired-like homeodomain 3
ASHG19A3A004242	130.471	309.771	6.94744	8.3669	coding	NM_004156	PPP2CB	RefSeq_coding	1807	chr8	-	30643126	30670352		ACTcccgcggcgcgcggccgggcggggaagggcggcggccgggctggggCTCGGGATCCG
ASHG19A3A008408	27559.6	35605.3	14.683	15.1659	coding	NM_001098833	ATXN7L3	RefSeq_coding	3635	chr17	-	42269173	42275529		TAGCTAACTTTGTAAACGCTGTGTATTCCCTCTGCCCCCATGGCTGCTGGTGTAAATAAA	56970	Hs.512651	GO:0030374|GO:0046872|GO:0005515|GO:0003713|GO:0016568|GO:0016578|GO:0045893|GO:0000124|GO:0005634	NP_064603	Ataxin 7-like 3
ASHG19A3A006609	105.924	141.972	6.65491	7.22933	coding	NM_182580	CYB561D1	RefSeq_coding	4944	chr1	+	110036700	110043062		TTTCTGACAGCGCTGTCCCGGCCAGGAACCAGTCTTTTCTCCTGGCACCCTGTATTCATG	284613	Hs.514682	GO:0046872|GO:0022900|GO:0006810|GO:0016021|GO:0016020	NP_872386	Cytochrome b-561 domain containing 1
ASHG19A3A001404	265.952	433.249	7.97403	8.85559	coding	NM_001042412	CYLD	RefSeq_coding	8608	chr16	+	50776028	50835846		AGCCGGGGCGAGGGGCGACGCCCCGCCGCCCGAGTTTCCCCCTTTCTAGGGTGAGGATGG	1540	Hs.578973	GO:0008234|GO:0046872|GO:0008233|GO:0070064|GO:0005515|GO:0019901|GO:0003735|GO:0004221|GO:0004843|GO:0008270|GO:0016055|GO:0007049|GO:0042347|GO:0032088|GO:0090090|GO:0032480|GO:0070536|GO:0070507|GO:0007346|GO:0006412|GO:0006511|GO:0005737|GO:0005881|GO:0005856|GO:0005829|GO:0031234|GO:0005622|GO:0030496|GO:0048471|GO:0005886|GO:0005840	NP_056062	Cylindromatosis (turban tumor syndrome)
ASHG19A3A035343	263.104	175.364	7.95711	7.53893	coding	NM_016118	NUB1	RefSeq_coding	3112	chr7	+	151038857	151075530		ATATTGATCCATCAAAAGTGGACAATTTGTTGCAGTTGGGGTTTACTGCCCAGGAAGCCC	51667	Hs.647082	GO:0005515|GO:0032436|GO:0016567|GO:0034341|GO:0034612|GO:0006511|GO:0005634	NP_057202	Negative regulator of ubiquitin-like proteins 1
ASHG19A3A005381	363.174	324.046	8.41563	8.43012	coding	NM_024828	C9orf82	RefSeq_coding	2833	chr9	-	26840683	26892826		CAGCGTCTCGGGCTCCTTGCAGCAGGAAACTAAATATATTTTGCCAACTTTGGAAAAAGA	79886	Hs.178357		NP_079104	Chromosome 9 open reading frame 82
ASHG19A3A006520	2753.85	3695.74	11.3412	11.9322	coding	NM_181077	GOLGA8A	RefSeq_coding	4264	chr15	-	34671271	34682001	NM_001023567,	GCTTCTGGTGGTTGCCACTCATCTGAGGCTTCCTCCTCCGCCTCCTCCTCTCTGCATGCG	440270	Hs.720151	GO:0005794|GO:0032580|GO:0016020	NP_001018861	Golgin A8 family, member B
ASHG19A3A005965	92.9463	98.1906	6.46453	6.68973	coding	NM_144596	TTC8	RefSeq_coding	2248	chr14	+	89290977	89344334		GCTGGAGAAGTCCCCTTATGACCAGGAACCAGATCCTGAATTGCCAGTGCATCAGGTAAA	123016	Hs.303055	GO:0005515|GO:0030030|GO:0042384|GO:0048560|GO:0050896|GO:0050893|GO:0007601|GO:0034464|GO:0005813|GO:0060170|GO:0044441|GO:0005737|GO:0005856|GO:0005932|GO:0005886	NP_938052	Tetratricopeptide repeat domain 8
ASHG19A3A017098	70.7902	121.169	6.06695	7.0034	coding	NM_001632	ALPP	RefSeq_coding	2883	chr2	+	233243347	233247597		TGATTTAAACCCGGGCAGCCTGGAGTGCAGCTCATACTCCATGCCCAGAATTCCTGCCTC	250	Hs.284255	GO:0004035|GO:0004035|GO:0016787|GO:0046872|GO:0031225|GO:0009986|GO:0016021|GO:0005886	NP_001623	Alkaline phosphatase, placental
ASHG19A3A025695	329.903	211.549	8.27941	7.81065	coding	NM_182976	ZNF326	RefSeq_coding	2729	chr1	+	90460677	90494094		TTATCAAGAAACCCAAACTAGCAAAACCTATGGAGAAGATAAGCCTCAGCAAATCACCCA	284695	Hs.306221	GO:0003677|GO:0046872|GO:0016563|GO:0008270|GO:0005626|GO:0005622|GO:0016363|GO:0005634	NP_892021	Zinc finger protein 326
ASHG19A3A011813	2765.36	2195.57	11.3462	11.1913	coding	NM_144687	NLRP12	RefSeq_coding	3871	chr19	-	54296856	54327648		AGAGTGAGAAAGCATTATTTCAGCAAAAGGTCTTTCCTCCCTTGCTCTCTCCTCCAACCA	91662	Hs.631573	GO:0005524|GO:0008656|GO:0000166|GO:0005515|GO:0006919|GO:0043124|GO:0045751|GO:0050710|GO:0050711|GO:0045409|GO:0031953|GO:0009968|GO:0050729|GO:0050718|GO:0045381|GO:0008588|GO:0007165|GO:0005737	NP_653288	NLR family, pyrin domain containing 12
ASHG19A3A018503	150.125	75.569	7.14923	6.31843	coding	NM_001001433	STX16	RefSeq_coding	4959	chr20	+	57226327	57254580		TTTAACCGACGCTTTCTTGTTGTTGCGGAATAATTCCATCCAAAACCGGCAGCTGTTAGC	8675	Hs.307913	GO:0005484|GO:0005515|GO:0006891|GO:0006886|GO:0042147|GO:0016192|GO:0005794|GO:0000139|GO:0031201|GO:0005737|GO:0016021|GO:0016020|GO:0005792	NP_003754	Syntaxin 16
ASHG19A3A015721	62117.1	47196.6	15.8991	15.5609	coding	NM_005917	MDH1	RefSeq_coding	1268	chr2	+	63816121	63834328		GATGGCAACTCCTATGGTGTTCCTGATGATCTGCTCTACTCATTCCCTGTTGTAATCAAG	4190	Hs.526521	GO:0030060|GO:0051287|GO:0005488|GO:0004470|GO:0016491|GO:0006734|GO:0005975|GO:0044262|GO:0006094|GO:0006006|GO:0006108|GO:0006107|GO:0055114|GO:0006099|GO:0005813|GO:0005737|GO:0005829|GO:0005739|GO:0005625	NP_005908	Malate dehydrogenase 1, NAD (soluble)
ASHG19A3A025826	1877.36	1075.24	10.7901	10.1546	coding	NM_015143	METAP1	RefSeq_coding	2835	chr4	+	99916787	99983959		ATTGTGGGCATGGAATCCACAAGCTTTTTCATACAGCTCCCAATGTACCCCACTATGCTA	23173	Hs.480364	GO:0004177|GO:0046872|GO:0008235|GO:0008233|GO:0005515|GO:0031365|GO:0009987|GO:0018206|GO:0006508|GO:0006417|GO:0005737	NP_055958	Methionyl aminopeptidase 1
ASHG19A3A028855	97.0222	133.105	6.52947	7.13777	coding	NM_016604	KDM3B	RefSeq_coding	6830	chr5	+	137688284	137772716		ATTCATGATGGAAAAGAGAAGCCAGGTGCTTTATGGCACATCTATGCAGCCAAGGATGCA	51780	Hs.483486	GO:0046872|GO:0016491|GO:0016702|GO:0016568|GO:0055114|GO:0005730|GO:0005634	NP_057688	Lysine (K)-specific demethylase 3B
ASHG19A3A041911	87312.7	106278	16.4288	16.6896	coding	NM_013230	CD24	RefSeq_coding	2194	chrY	-	21152525	21154705		TGTGTGTGTGAATGAACACTCTTTTGCTTTATTCCAGAATGCTGTACATCTATTTTGGAT	100133941	Hs.644105	GO:0005515|GO:0019901|GO:0030296|GO:0004871|GO:0032597|GO:0031295|GO:0016055|GO:0007411|GO:0001775|GO:0016477|GO:0016337|GO:0032600|GO:0042632|GO:0007204|GO:0002768|GO:0008629|GO:0032913|GO:0043406|GO:0042104|GO:0061098|GO:0043408|GO:0001959|GO:0030856|GO:0042325|GO:0045730|GO:0043627|GO:0001666|GO:0002237|GO:0031225|GO:0009986|GO:0016020|GO:0045121|GO:0005886	NP_037362	CD24 molecule
ASHG19A3A010897	176.116	92.3431	7.37601	6.5997	coding	NM_001080400	PLIN4	RefSeq_coding	6353	chr19	-	4502191	4517716		CCACTGCACCAGCAATGCTAGAAAACCAAGCCAATAAAAGTGATTTCTTTTTTCATTAAA	729359	Hs.591387	GO:0005737|GO:0005811|GO:0005886	NP_001073869	Perilipin 4
ASHG19A3A044437	113.331	176.918	6.74915	7.5533	coding	NM_020682	AS3MT	RefSeq_coding	2477	chr10	+	104629209	104661653		ATCAGACCAATTGGAGAGAAGTTGCCAACATCTGGAGGCTGTTCTGCTTTGGAGTTAAAG	57412	Hs.720370	GO:0030791|GO:0030792|GO:0008168|GO:0016740|GO:0018872|GO:0008152|GO:0046685|GO:0009404|GO:0005737|GO:0005829|GO:0005739|GO:0005625	NP_065733	Arsenic (+3 oxidation state) methyltransferase
ASHG19A3A028696	629.923	637.031	9.20225	9.40559	coding	NM_177478	FTMT	RefSeq_coding	894	chr5	+	121187649	121188521		AAAGTCAGCTGTCTCCTGCTTTCTTGCCCTTAAAATCACCTCCATCTTTATATTCTTCTG	94033	Hs.105324	GO:0005488|GO:0008199|GO:0004322|GO:0046914|GO:0006879|GO:0006826|GO:0055114|GO:0008284|GO:0051349|GO:0051353|GO:0051347|GO:0005739	NP_803431	Ferritin mitochondrial
ASHG19A3A049219	7644.61	5568.59	12.8206	12.5271	coding	NM_001142641	FBRSL1	RefSeq_coding	4563	chr12	+	133067156	133161771		ACCCTGTTTGTTTTAAATATTCTGTTCCCATGTCAATCAGTGACGATAAATACAGCCTTG	57666	Hs.411138		NP_001136113	Fibrosin-like 1
ASHG19A3A028364	324.869	339.546	8.25726	8.49626	coding	NM_014813	LRIG2	RefSeq_coding	4015	chr1	+	113615830	113667342		ATCTATAGCTGCATGGCACAAAATACAGCAGGAGGTCTCTCAGCAAATGCTTCCCTAACA	9860	Hs.448972	GO:0005737|GO:0016021|GO:0005886	NP_055628	Leucine-rich repeats and immunoglobulin-like domains 2
ASHG19A3A054963	1151.44	895.018	10.0852	9.89	coding	NM_182705	FAM101B	RefSeq_coding	3895	chr17	-	289773	295731		TGACACCTGCCCCACTCCATTTTGCTTTGTGATGTCTTCATTTAACAATAAATTATCTGA	359845	Hs.729155		NP_874364	Family with sequence similarity 101, member B
ASHG19A3A004021	83.3171	82.9701	6.30163	6.44858	coding	NM_015844	MBD1	RefSeq_coding	3116	chr18	-	47795216	47808144	NM_002384,	TTACTGTGTAGACGAGGACGAGCTAAAGCGGCTGCTGCCCAGTGTCTGGTCAGAGTCTGA	4152	Hs.405610	GO:0003677|GO:0046872|GO:0008327|GO:0005515|GO:0003700|GO:0003714|GO:0016564|GO:0008270|GO:0006366|GO:0005694|GO:0005737|GO:0000792|GO:0016607|GO:0005634	NP_056723	Methyl-CpG binding domain protein 1
ASHG19A3A052393	36577.4	31973.9	15.1119	15.0129	coding	NM_004255	COX5A	RefSeq_coding	784	chr15	-	75212618	75230495		ATGCTCGCTGGGTAACATACTTCAACAAGCCAGATATAGATGCCTGGGAATTGCGTAAAG	9377	Hs.401903	GO:0004129|GO:0009055|GO:0046872|GO:0022904|GO:0016020|GO:0005743|GO:0005739	NP_004246	Cytochrome c oxidase subunit Va
ASHG19A3A037740	1400.11	1515.72	10.3639	10.6475	coding	NM_000136	FANCC	RefSeq_coding	4612	chr9	-	97861337	98079991		ATAAAGCATGCTGGTAAAACCACTACCCTCAGAGAGAGCCAAAAATACAGAAGAGGCGGA	2176	Hs.494529	GO:0005515|GO:0006281|GO:0006461|GO:0000785|GO:0005737|GO:0005829|GO:0005654|GO:0005634	NP_000127	Fanconi anemia, complementation group C
ASHG19A3A021105	457.865	310.402	8.74629	8.36942	coding	NM_006545	NPRL2	RefSeq_coding	1672	chr3	-	50384918	50388486		TTTGACACAGTCCAAGTGTACATCATCACCAAGCCAGAGCTGCAGAACAAGCTTATCACT	10641	Hs.437083	GO:0005515|GO:0004672|GO:0033673	NP_006536	Nitrogen permease regulator-like 2 (S. cerevisiae)
ASHG19A3A017561	368.706	386.839	8.4356	8.68767	coding	NM_080675	SUN5	RefSeq_coding	1267	chr20	-	31571581	31592239		GCCCAGAGAGCAGCCTCACCAGAACCCCTACCCTAAGAGAGATTAAAATTTATTCTTTAC	140732	Hs.375186	GO:0003674|GO:0007283|GO:0005575	NP_542406	Sad1 and UNC84 domain containing 5
ASHG19A3A005348	1285.31	1413.32	10.2416	10.5496	coding	NM_024300	CHCHD7	RefSeq_coding	1703	chr8	+	57124314	57131174	NM_001011669,	AGAAACTCATGCACCAAACTCGAACTGGTAAGAAGACTGTTAGAATGCCCTCGGTAACAC	79145	Hs.436913	GO:0005739	NP_077276	Coiled-coil-helix-coiled-coil-helix domain containing 7
ASHG19A3A041750	93.2649	99.5772	6.46836	6.71223	coding	NM_020061	OPN1LW	RefSeq_coding	1234	chrX	+	153409724	153424505	NM_001048181,NM_000513,	TACTTTGCCAAAAGTGCCACTATCTACAACCCCGTTATCTATGTCTTTATGAACCGGCAG	5956	Hs.592247	GO:0004930|GO:0009881|GO:0007602|GO:0018298|GO:0050896|GO:0007165|GO:0007601|GO:0005887|GO:0005886	NP_064445	Opsin 1 (cone pigments), long-wave-sensitive
ASHG19A3A044595	254.248	279.236	7.90809	8.21231	coding	NM_007329	DMBT1	RefSeq_coding	7686	chr10	+	124320180	124403252	NM_004406,NM_004406,	ACAATGGCTGGCTCTCCCATAACTGTGGCCATAGTGAAGACGCTGGTGTCATCTGCTCAG	1755	Hs.279611	GO:0051636|GO:0051637|GO:0048306|GO:0008329|GO:0005044|GO:0005044|GO:0035375|GO:0030855|GO:0030855|GO:0043152|GO:0045087|GO:0044419|GO:0007275|GO:0002221|GO:0015031|GO:0009615|GO:0005737|GO:0005576|GO:0019898|GO:0016020|GO:0030670|GO:0042589	NP_060049	Deleted in malignant brain tumors 1
ASHG19A3A000966	548.794	629.906	9.00381	9.38868	coding	NM_001012718	IL32	RefSeq_coding	1093	chr16	+	3115312	3119667		GACCCCAGACCTCTGTCTCTCTCGGCAGGCCTTGGCTCCTTGAACTTTTGGCCGCCATGT	9235	Hs.943	GO:0005125|GO:0007155|GO:0006952|GO:0006955|GO:0005576|GO:0005615	NP_004212	Interleukin 32
ASHG19A3A035692	698.249	694.369	9.35902	9.52906	coding	NM_001007243	STAR	RefSeq_coding	2641	chr8	-	38000217	38008600	NM_000349,	TATCCTTGACCCCTTCCTTTGCACAGTGAGTGATGGCGTTTTTATCTCCTGATGATGATG
ASHG19A3A039469	17148	12624.8	13.9946	13.6956	coding	NM_021138	TRAF2	RefSeq_coding	2298	chr9	+	139780964	139821066		GAGAGCTTGCCATCCAGCTCACGAAGACAGAGTTATTAAACCATTCAAATCTCTGTGGTC	7186	Hs.522506	GO:0005174|GO:0019899|GO:0016874|GO:0046872|GO:0005515|GO:0004871|GO:0046625|GO:0004842|GO:0008270|GO:0007250|GO:0006919|GO:0008633|GO:0006915|GO:0043623|GO:0008624|GO:0043507|GO:0051092|GO:0050870|GO:0002726|GO:0032743|GO:0051091|GO:0070534|GO:0051865|GO:0051865|GO:0006461|GO:0070207|GO:0042981|GO:0007165|GO:0033209|GO:0035631|GO:0005737|GO:0005829|GO:0005829|GO:0009898	NP_066961	TNF receptor-associated factor 2
ASHG19A3A028924	1308.05	411.813	10.2634	8.77988	coding	NM_018939	PCDHB6	RefSeq_coding	3030	chr5	+	140529838	140532866		TTACTGAAGTGTCAACACATTAGTTTGTGAGCCTCATGTAAGAACATGATGGTCTTTTTT	56130	Hs.283085	GO:0005509|GO:0016339|GO:0007155|GO:0007156|GO:0007399|GO:0007416|GO:0007268|GO:0016021|GO:0005887|GO:0005886	NP_061762	Protocadherin beta 6
ASHG19A3A039915	273.9	271.125	8.01548	8.16977	coding	NM_133179	XAGE3	RefSeq_coding	543	chrX	-	52891559	52897119		AGTTGTGAGGGTGTGAGGGTCGCGTTCCTGCTGTCTGGACTTTTTCTGTCCCACTGAGAC	170626	Hs.43879		NP_573440	X antigen family, member 3
ASHG19A3A002133	103.666	79.4011	6.62325	6.38853	coding	NM_001130012	SLC9A3R2	RefSeq_coding	2192	chr16	+	2076887	2089026		GCCTGGTTCCGACAAGGACACTGAGGATGGCAGTGCCTGGAAGCAAGATCCCTTCCAGGA	9351	Hs.440896	GO:0008013|GO:0016247|GO:0019902|GO:0008022|GO:0005515|GO:0005102|GO:0048839|GO:0006461|GO:0016324|GO:0005737|GO:0012505|GO:0005634|GO:0005886	NP_004776	Solute carrier family 9 (sodium/hydrogen exchanger), member 3 regulator 2
ASHG19A3A011646	405.724	515.924	8.57247	9.10749	coding	NM_144577	CCDC114	RefSeq_coding	3234	chr19	-	48799708	48823332		GGTTCAGCATGGGAAAATGGGACTGTGGAAATAAAGTATATGTGTGGAGAGCTGGCTTCA	93233	Hs.112645		NP_653178	Coiled-coil domain containing 114
ASHG19A3A001346	430.829	384.872	8.65832	8.68039	coding	NM_001040161	C16orf13	RefSeq_coding	563	chr16	-	684428	686347		ACGTGGACCAGCGCTGCCTGGACAGGAACCCAGAATGGGGGCTTCGGGACACAGCCCTCC	84326	Hs.239500		NP_115742	Chromosome 16 open reading frame 13
ASHG19A3A001970	150.178	200.828	7.14966	7.73502	coding	NM_001126241	TP73	RefSeq_coding	2728	chr1	+	3607235	3650467		ACCACGCCGACCCCAGCCTCGTCAGGACCTGGGGGCCCTGAAGATCCCCGAGCAGTACCG	7161	Hs.697294	GO:0003682|GO:0003684|GO:0003690|GO:0046872|GO:0002039|GO:0010843|GO:0005515|GO:0003700|GO:0016563|GO:0008134|GO:0016564|GO:0042771|GO:0006978|GO:0008630|GO:0007049|GO:0007050|GO:0034644|GO:0033326|GO:0048546|GO:0030900|GO:0021766|GO:0006954|GO:0006298|GO:0031571|GO:0043508|GO:0043524|GO:0000122|GO:0048666|GO:0045793|GO:0043193|GO:0010552|GO:0045893|GO:0009791|GO:0051262|GO:0001836|GO:0006974|GO:…	NP_005418	Tumor protein p73
ASHG19A3A037210	79.157	89.057	6.22775	6.54748	coding	NM_001167575	C9orf82	RefSeq_coding	2987	chr9	-	26840683	26892826		GCTAGCGCGGCAATCTCAAGGTCGTCCGTCCTTGAGGTTCATGTTCCTACCTAAGTCCTG	79886	Hs.178357		NP_079104	Chromosome 9 open reading frame 82
ASHG19A3A050445	94.1462	65.8086	6.48312	6.12016	coding	NM_017693	BIVM	RefSeq_coding	3873	chr13	+	103451398	103493887		TCGCATGGGAAATTGATAAATCTGAATTTGATGGGGTGACCACAAATTCGAAACACAAAT	54841	Hs.288809	GO:0005737|GO:0005634	NP_060163	Basic, immunoglobulin-like variable motif containing
ASHG19A3A031114	203.956	244.752	7.5881	8.01778	coding	NM_003540	HIST1H4F	RefSeq_coding	368	chr6	+	26240653	26241021		CTGAGCCTCACCCCGGCTTTTTATTTAACAGCTCACCCATAAAAGGCCCTTTTCAGGGCC	8361	Hs.247816		NP_003531	Histone cluster 1, H4f
ASHG19A3A049805	68.6948	73.6314	6.02414	6.27944	coding	NM_052867	NALCN	RefSeq_coding	6923	chr13	-	101706129	102068813		TTGCATTTCCATGATGTTTGAGTCCCCGTTTCGAAGAGTCATGCATGCACCTACTTTGCA	259232	Hs.525146	GO:0005272|GO:0005244|GO:0006811|GO:0006814|GO:0055085|GO:0016021|GO:0016020	NP_443099	Sodium leak channel, non-selective
ASHG19A3A030961	497.138	368.497	8.86079	8.62174	coding	NM_144618	GABPB2	RefSeq_coding	1953	chr1	+	151043079	151091007		TCGGGTGAGGTTGTTAACCTCGCAAGCCTTATTTCTTCAACCAACACCAAAACAACCTCA	126626	Hs.654699	GO:0010843|GO:0046982|GO:0042803|GO:0016563|GO:0010552|GO:0005634	NP_653219	GA binding protein transcription factor, beta subunit 2
ASHG19A3A054698	96.4334	101.08	6.52003	6.73284	coding	NM_024712	ELMO3	RefSeq_coding	2548	chr16	+	67233027	67237926		ATCATCCACAGTGCAGCACCAATGGGCGACGAGATGGCTCATCACCTGTACGTACTGCAG	79767	Hs.377416	GO:0017124|GO:0005488|GO:0006915|GO:0006909|GO:0005737|GO:0005856	NP_078988	Engulfment and cell motility 3
ASHG19A3A036200	291.797	563.978	8.10531	9.23274	coding	NM_003695	LY6D	RefSeq_coding	806	chr8	-	143866297	143868008		CACTCCTTCTGTTTTGTTGCCGTTTATTTTTGTACTCAAATCTCTACATGGAGATAAATG	8581	Hs.415762	GO:0005515|GO:0007155|GO:0030098|GO:0031225|GO:0009986|GO:0005624|GO:0005886	NP_003686	Lymphocyte antigen 6 complex, locus D
ASHG19A3A002921	67.4746	70	5.99611	6.20843	coding	NM_001146155	PTGR2	RefSeq_coding	2568	chr14	+	74318546	74352166		CCCGAAGCTGCTTCGGGCCCCAGCGGAGTATTTTATACAGAAATCTTGTGAAACCACTGC	145482	Hs.632344	GO:0047522|GO:0005488|GO:0016491|GO:0008270|GO:0055114|GO:0005737|GO:0005739	NP_689657	Prostaglandin reductase 2
ASHG19A3A038173	91.5428	139.674	6.44229	7.20775	coding	NM_017585	SLC2A6	RefSeq_coding	2563	chr9	-	136336216	136344276		AACCTGACTCTGGGGCTGTACATCCACTTTGGCCCCAGGCCTCTGAGCCCCAACAGCACT	11182	Hs.244378	GO:0055056|GO:0005355|GO:0022891|GO:0008643|GO:0015758|GO:0055085|GO:0016021|GO:0016020|GO:0005886	NP_060055	Solute carrier family 2 (facilitated glucose transporter), member 6
ASHG19A3A005811	73.2382	175.217	6.11453	7.53738	coding	NM_133454	SGSM1	RefSeq_coding	6018	chr22	+	25202135	25322813	NM_001098498,	GATGACGGAAACAGAAAGGAAAGAGTCCTCCCAGAGCTGCAGTTCGGGCCGCCAGAACAT	129049	Hs.474397	GO:0005097|GO:0032313|GO:0005794|GO:0005622	NP_597711	Small G protein signaling modulator 1
ASHG19A3A004476	77.0071	133.291	6.18697	7.13974	coding	NM_006182	DDR2	RefSeq_coding	3172	chr1	+	162602227	162750237		CCACAGAGAATGCTCTGCACCCGTTGATACTCCAGTTCCAACACCATCTTCTGAGATGAT	4921	Hs.593833	GO:0005524|GO:0005518|GO:0000166|GO:0004872|GO:0004714|GO:0007155|GO:0008284|GO:0006468|GO:0007165|GO:0007169|GO:0016324|GO:0005887|GO:0016020	NP_006173	Discoidin domain receptor tyrosine kinase 2
ASHG19A3A020423	25692.1	30253.5	14.5849	14.9427	coding	NM_002305	LGALS1	RefSeq_coding	586	chr22	+	38071612	38075807		AACTACATGGCAGCTGACGGTGACTTCAAGATCAAATGTGTGGCCTTTGACTGAAATCAG	3956	Hs.445351	GO:0016936|GO:0001948|GO:0030395|GO:0043236|GO:0005515|GO:0042803|GO:0004871|GO:0005529|GO:0006915|GO:0071333|GO:0071407|GO:0033555|GO:0045445|GO:0010812|GO:0010977|GO:0043123|GO:0034120|GO:0042981|GO:0048678|GO:0042493|GO:0007165|GO:0009986|GO:0005737|GO:0031012|GO:0005576|GO:0005615|GO:0005622|GO:0005634|GO:0005578	NP_002296	Lectin, galactoside-binding, soluble, 1
ASHG19A3A054762	73.0419	81.4786	6.11142	6.42413	coding	NM_000734	CD247	RefSeq_coding	1687	chr1	-	167399877	167487847		ATGACAAAATCATCTTTGTGAAGGCCTCGCAGGAAGACCCAACACATGGGACCTATAACT	919	Hs.156445	GO:0042802|GO:0005515|GO:0042803|GO:0004888|GO:0031295|GO:0050852|GO:0007166|GO:0044419|GO:0050690|GO:0050776|GO:0016032|GO:0042101|GO:0042105|GO:0005737|GO:0016021|GO:0005886|GO:0005886|GO:0005886	NP_932170	CD247 molecule
ASHG19A3A038057	240.961	254.504	7.82672	8.07573	coding	NM_001035534	FAM129B	RefSeq_coding	3818	chr9	-	130267618	130341268		AACTGGGCCAGTTCCGGTCCCTTCCTTTTGGGGCTCTCACTCTGGAGGATGGGGTGGATG	64855	Hs.522401	GO:0005515	NP_073744	Family with sequence similarity 129, member B
ASHG19A3A010339	103.53	66.0649	6.62141	6.12596	coding	NM_005957	MTHFR	RefSeq_coding	7150	chr1	-	11845786	11866160		TTTCATCATCACGCAGCTTTTCTTTGAGGCTGACACATTCTTCCGCTTTGTGAAGGCATG	4524	Hs.214142	GO:0004489|GO:0016491|GO:0005515|GO:0008015|GO:0006520|GO:0046655|GO:0009086|GO:0055114|GO:0006766|GO:0006767|GO:0005829	NP_005948	Methylenetetrahydrofolate reductase (NAD(P)H)
ASHG19A3A018764	504.107	393.528	8.88084	8.71257	coding	NM_181602	KRTAP6-1	RefSeq_coding	219	chr21	-	31986005	31986223		TCCCGCTCCCTCTGTGGCTATGGCTATGGATGCGGCTCTGGCTCTGGCTACTATTATTGA	337966	Hs.553689	GO:0005829|GO:0005882	NP_853633	Keratin associated protein 6-1
ASHG19A3A009402	1646.98	1178.98	10.5981	10.2905	coding	NM_013975	LIG3	RefSeq_coding	3701	chr17	+	33307537	33332088		ATTCAGCCTGACACGCTTTGCCAGGAACAAACCTCATGTGAAAGAAAACAAAATGAATTT	3980	Hs.100299	GO:0005524|GO:0003677|GO:0003910|GO:0003909|GO:0003909|GO:0016874|GO:0046872|GO:0000166|GO:0005515|GO:0008270|GO:0006266|GO:0051103|GO:0006281|GO:0006260|GO:0033151|GO:0006284|GO:0007049|GO:0051301|GO:0007131|GO:0007283|GO:0005622|GO:0005654|GO:0005654|GO:0005634	NP_039269	Ligase III, DNA, ATP-dependent
ASHG19A3A019675	100.01	107.737	6.57447	6.8307	coding	NM_001017981	RNF215	RefSeq_coding	1922	chr22	-	30774804	30783302		TCGAGTGGAAGTTGACCTTGTGGACCACCTGTGGCCTCTCCAAGGATGGCTATGGAGGAT	200312	Hs.592194	GO:0046872|GO:0008270|GO:0016021|GO:0016020	NP_001017981	Ring finger protein 215
ASHG19A3A026770	661.821	700.75	9.27859	9.54139	coding	NM_198449	EMB	RefSeq_coding	4309	chr5	-	49692032	49737234	NR_003955,ENST00000458200,	TTTTAGTGGCCACCATTCTGCTTTGTGAAAAGTACACACAAAAGAAAAAGAAGCACTCAG	133418	Hs.561411	GO:0007155|GO:0016021|GO:0016020	NP_940851	Embigin
ASHG19A3A019993	1081.7	1062.02	9.99532	10.1366	coding	NM_001145137	CPT1B	RefSeq_coding	2721	chr22	-	51007290	51016506		GGCGCGGCTGGCGGCGGGGCCGGCCTAAGCGCGCCCGCGCACCCATCTGCCCCCGTCCTA	1375	Hs.439777	GO:0008415|GO:0004095|GO:0016740|GO:0006853|GO:0044255|GO:0006635|GO:0006631|GO:0046320|GO:0006810|GO:0016021|GO:0016020|GO:0005792|GO:0005741|GO:0005739	NP_689452	Carnitine palmitoyltransferase 1B (muscle)
ASHG19A3A048684	138.874	117.728	7.0335	6.95959	coding	NM_001005490	OR6C74	RefSeq_coding	939	chr12	+	55641071	55642009		GTTGCCCCCATGTTGAATCCCTTTATTTATACACTGAGAAACAAACAAGTAAAAGATGTT	254783	Hs.554556	GO:0004984|GO:0004872|GO:0050896|GO:0007608|GO:0016021|GO:0005886	NP_001005490	Olfactory receptor, family 6, subfamily C, member 74
ASHG19A3A030251	578.468	816.467	9.07869	9.76242	coding	NM_001170755	NBPF15	RefSeq_coding	4802	chr1	+	148558187	148596267		TATATTTCTGGCCCCCCAGTGTCAGTCCATTCATGACAAAGTTTGACCAGTCTTTGCCAA	284565	Hs.656782	GO:0005737	NP_775909	Neuroblastoma breakpoint family, member 15
ASHG19A3A039447	67.4568	109.956	5.99567	6.85885	coding	NM_001145638	GPSM1	RefSeq_coding	3651	chr9	+	139221931	139254057		CGGGAGGGCAGCCACTCCCCGCTGGACAGCGCCGACGTCCGGGTGCACGTGCCACGCACG	26086	Hs.239370	GO:0005096|GO:0005488|GO:0030154|GO:0007275|GO:0007399|GO:0008277|GO:0007165|GO:0005794|GO:0000139|GO:0005737|GO:0005829|GO:0005783|GO:0005789|GO:0005886	NP_056412	G-protein signaling modulator 1
ASHG19A3A002566	398.79	451.722	8.54833	8.91603	coding	NM_001142554	TRMT1	RefSeq_coding	2195	chr19	-	13215713	13227463		AGGCCAAGGTCAAGGCCTCAGCCAGGGCCAAGTTCTCTGCAGCCTGTGGTCCCCCTGTGA	55621	Hs.515169	GO:0003723|GO:0046872|GO:0008168|GO:0004809|GO:0016740|GO:0008270|GO:0008033	NP_060192	TRM1 tRNA methyltransferase 1 homolog (S. cerevisiae)
ASHG19A3A036982	122.351	123.522	6.857	7.03268	coding	NM_178172	GPIHBP1	RefSeq_coding	2296	chr8	+	144295067	144299043		TAACTGTTCTCTTCTTTTCCTTATTAATAAAACACACAATGCCTAGCTGGGGGGTCGGAA	338328	Hs.426410	GO:0034185|GO:0035478|GO:0008035|GO:0035473|GO:0008289|GO:0071813|GO:0042632|GO:0006869|GO:0090321|GO:0051006|GO:0050821|GO:0071503|GO:0070328|GO:0031362|GO:0009897|GO:0034364|GO:0016021|GO:0005886	NP_835466	Glycosylphosphatidylinositol anchored high density lipoprotein binding protein 1
ASHG19A3A000940	139.37	137.462	7.03963	7.18425	coding	NM_001011722	ARHGEF10L	RefSeq_coding	4269	chr1	+	17907047	18024369		GCACCGAGTGTCCTTCCAGCCCAAGATGACCCAGCTCATGAAGGCCGCCAAGAGCGGGAC	55160	Hs.443460	GO:0005089|GO:0005085|GO:0035023|GO:0005737|GO:0005622	NP_060595	Rho guanine nucleotide exchange factor (GEF) 10-like
ASHG19A3A049592	193.884	256.738	7.51544	8.08859	coding	NM_152720	NEK3	RefSeq_coding	2255	chr13	-	52706779	52733510		TTCCAGGAGAAAGGGCCCTCACGGGTGAGCGGGGCGACTGGGCTCCCCCGCGGTGCAGTT	4752	Hs.409989	GO:0005524|GO:0046872|GO:0000166|GO:0005515|GO:0004674|GO:0016740|GO:0007049|GO:0051301|GO:0007067|GO:0006468|GO:0005634	NP_689933	NIMA (never in mitosis gene a)-related kinase 3
ASHG19A3A042955	95.2213	97.6319	6.50054	6.68044	coding	NM_018207	TRIM62	RefSeq_coding	3865	chr1	-	33611003	33647671		AAGGGAAAAATCCATGAGACCAACCTCACATATGAAGACTTCCCGACCTCCAAGTACACA	55223	Hs.656006	GO:0046872|GO:0008270|GO:0005622	NP_060677	Tripartite motif-containing 62
ASHG19A3A012682	1280.71	804.521	10.2346	9.74024	coding	NM_006503	PSMC4	RefSeq_coding	1450	chr19	+	40477072	40487351		GCAGGAGGAATACATCAAAGATGAGCAAAAGAACCTGAAAAAGGAATTTCTCCATGCCCA	5704	Hs.211594	GO:0005524|GO:0016887|GO:0016787|GO:0000166|GO:0005515|GO:0006200|GO:0006977|GO:0000082|GO:0000216|GO:0016070|GO:0000084|GO:0031145|GO:0031145|GO:0006915|GO:0001824|GO:0000075|GO:0034641|GO:0016071|GO:0000278|GO:0051436|GO:0051437|GO:0030163|GO:0006508|GO:0042981|GO:0006521|GO:0051439|GO:0016032|GO:0005737|GO:0005739|GO:0005730|GO:0005634|GO:0000502	NP_694546	Proteasome (prosome, macropain) 26S subunit, ATPase, 4
ASHG19A3A020904	208.835	185.904	7.62285	7.6219	coding	NM_001171172	CX3CR1	RefSeq_coding	3224	chr3	-	39304985	39321930		TGAAGGCTCCCCATTAATGAGAGCTGACTGTGCTGTGCTTTGCTGACTGCAGGGCCTGCT	1524	Hs.78913	GO:0004930|GO:0004950|GO:0004896|GO:0005515|GO:0004872|GO:0007186|GO:0007155|GO:0006968|GO:0021795|GO:0006935|GO:0044419|GO:0048246|GO:0002282|GO:0016525|GO:0043066|GO:0009611|GO:0005887|GO:0005886	NP_001328	Chemokine (C-X3-C motif) receptor 1
ASHG19A3A048460	12537.8	10997.5	13.5406	13.4998	coding	NM_001171888	FGFR1OP2	RefSeq_coding	998	chr12	+	27091304	27113677		GGGTCCATTTTAAAAGTGCTTTTACATTGAATTTCCCTCCCAGATTAGATCAGCAAATAA	26127	Hs.591162	GO:0009611|GO:0005737	NP_056448	FGFR1 oncogene partner 2
ASHG19A3A041706	755.995	723.928	9.47178	9.58845	coding	NM_175868	MAGEA6	RefSeq_coding	1787	chrX	+	151867244	151870814		TGCAGCCTCAGCATGCGCTGGCCGGATGTACCCTGAGGTGCCCTCTCACTTCCTCCTTCA	4105	Hs.441113	GO:0003674|GO:0005515|GO:0008150|GO:0005575	NP_787064	Melanoma antigen family A, 6
ASHG19A3A005313	2570.95	3488.49	11.2383	11.8441	coding	NM_022874	SMN1	RefSeq_coding	1545	chr5	+	70220767	70248836	NM_022877,	ATGCCAGGGCCAAGACTGGGACCAGGAAAGATAATTCCCCCACCACCTCCCATATGTCCA	6606	Hs.535788		NP_075012	Survival of motor neuron 1, telomeric
ASHG19A3A045471	187.333	201.9	7.46504	7.742	coding	NM_001080494	TTC39A	RefSeq_coding	2759	chr1	-	51752930	51787938		TTGGAGAAGGAGGAGGGAAAAAGGGGCTGTGGGATTTAGTGGCTGGGCTGCACCCCCTGG	22996	Hs.112949	GO:0005488|GO:0003674|GO:0008150|GO:0005575	NP_001138304	Tetratricopeptide repeat domain 39A
ASHG19A3A014782	369.531	425.111	8.43857	8.8268	coding	NM_001126240	TP73	RefSeq_coding	2822	chr1	+	3607235	3650467	NM_005427,NM_001126242,	TTTTAACAGGATTGGGGTGTCCAAACTGCATCGAGTATTTCACCTCCCAAGGGTTACAGA	7161	Hs.697294	GO:0003682|GO:0003684|GO:0003690|GO:0046872|GO:0002039|GO:0010843|GO:0005515|GO:0003700|GO:0016563|GO:0008134|GO:0016564|GO:0042771|GO:0006978|GO:0008630|GO:0007049|GO:0007050|GO:0034644|GO:0033326|GO:0048546|GO:0030900|GO:0021766|GO:0006954|GO:0006298|GO:0031571|GO:0043508|GO:0043524|GO:0000122|GO:0048666|GO:0045793|GO:0043193|GO:0010552|GO:0045893|GO:0009791|GO:0051262|GO:0001836|GO:0006974|GO:…	NP_005418	Tumor protein p73
ASHG19A3A017017	64.8406	86.6001	5.94133	6.50824	coding	NM_201574	SLC4A3	RefSeq_coding	4255	chr2	+	220492291	220506701		AGCTGAGGGACGGTGATGGAACCACCGACCTGGCCCTGTCAAGTCCAAGGCTGCTGTGTT	6508	Hs.1176	GO:0015297|GO:0005452|GO:0005215|GO:0015701|GO:0006811|GO:0055085|GO:0006810|GO:0005887|GO:0005624|GO:0005886	NP_963868	Solute carrier family 4, anion exchanger, member 3
ASHG19A3A016971	12981.9	15136.7	13.5964	13.9598	coding	NM_005731	ARPC2	RefSeq_coding	1424	chr2	+	219082119	219119070		TCCGTCCTTGCCTCCCTTACCCACCCTCACCGGCCCTTGTTTCTCCTTCCCCTGGGGGCA	10109	Hs.529303	GO:0003779|GO:0005515|GO:0005200|GO:0006928|GO:0030838|GO:0005885|GO:0005794|GO:0015629|GO:0031252|GO:0042995|GO:0005737|GO:0005925	NP_690601	Actin related protein 2/3 complex, subunit 2, 34kDa
ASHG19A3A048613	285.642	217.878	8.07343	7.85338	coding	NM_181711	GRASP	RefSeq_coding	1950	chr12	+	52400747	52409671		TCCACCGTTGTGCATATTGTTGCTTCTGAACCACAAACTGTATAAATGGATGGTTTTTTG	160622	Hs.407202	GO:0030306|GO:0030165|GO:0008104|GO:0007165|GO:0030054|GO:0005737|GO:0048471|GO:0005886|GO:0045211|GO:0045202	NP_859062	GRP1 (general receptor for phosphoinositides 1)-associated scaffold protein
ASHG19A3A046222	135.333	109.878	6.99713	6.85761	coding	NM_003986	BBOX1	RefSeq_coding	1901	chr11	+	27062508	27149354		TGAACTGCTTGTTCACTTGCTGCTGTTGCCACTGCTGGTACAGAAATAGAAGGTAAGACA	8424	Hs.591996	GO:0008336|GO:0008336|GO:0008336|GO:0005506|GO:0046872|GO:0016491|GO:0016702|GO:0008270|GO:0045329|GO:0045329|GO:0034641|GO:0055114|GO:0015629|GO:0005737|GO:0005829|GO:0043231|GO:0005739	NP_003977	Butyrobetaine (gamma), 2-oxoglutarate dioxygenase (gamma-butyrobetaine hydroxylase) 1
ASHG19A3A021063	170.4	114.151	7.32859	6.91419	coding	NM_198562	C3orf62	RefSeq_coding	3590	chr3	-	49306029	49314508		TGTATTGATGCATTCCTCCATTTTGGCACCTGAAAGAGAGTCTTGGAGAACTGCAGGAGA	375341	Hs.403828		NP_940964	Chromosome 3 open reading frame 62
ASHG19A3A004533	188.894	173.928	7.47704	7.52698	coding	NM_006669	LILRB1	RefSeq_coding	2971	chr19	+	55128628	55149002		TGGTCTTTGTGCACATTTACATCAAGCTCAGCCTGGGCGGCACAGCCAGATGCGAGATGC	10859	Hs.667388	GO:0008157|GO:0004872|GO:0050776|GO:0009615|GO:0016021|GO:0005886	NP_006660	Leukocyte immunoglobulin-like receptor, subfamily B (with TM and ITIM domains), member 1
ASHG19A3A040013	123.641	108.8	6.87169	6.84471	coding	NM_022368	PJA1	RefSeq_coding	2316	chrX	-	68380697	68385340	NM_145119,NM_001032396,	GCCCCGCTGCTGTCTGGCGGGGGAGGAGCTCGGGACCGGGAGCAGCGGCTCTGGCGGTCG	64219	Hs.522679	GO:0016874|GO:0046872|GO:0008270	NP_660095	Praja ring finger 1
ASHG19A3A008372	5753.11	6635.32	12.4108	12.7767	coding	NM_024927	PLEKHH3	RefSeq_coding	3076	chr17	-	40819932	40829048		CCAAGGGCTACAATGGGTGTGGGTAATTTTCTAGTTTGTTTCTTAATTTATTTGTAGAAG	79990	Hs.632251	GO:0007165|GO:0005856	NP_079203	Pleckstrin homology domain containing, family H (with MyTH4 domain) member 3
ASHG19A3A045945	107.218	155.51	6.67334	7.36523	coding	NM_001025237	TSPAN4	RefSeq_coding	1479	chr11	+	844445	867116		CTCAGTCCCGACTGGGCTCTACCTGAGGACCCTGGGGAGCCTGGGCCTGGCCCTCCTCAG	7106	Hs.654836	GO:0006461|GO:0005887|GO:0005886	NP_003262	Tetraspanin 4
ASHG19A3A054793	46752.1	47221.3	15.481	15.5618	coding	NM_002811	PSMD7	RefSeq_coding	1678	chr16	+	74330680	74340184		CAGGGGTTGTGATCCAGCTCCATATATTGTTTACCTTCAAAGATACAATTAAATGGCTTG	5713	Hs.440604	GO:0005515|GO:0006977|GO:0000082|GO:0000216|GO:0016070|GO:0000084|GO:0031145|GO:0031145|GO:0006915|GO:0000075|GO:0034641|GO:0016071|GO:0000278|GO:0051436|GO:0051437|GO:0042981|GO:0006521|GO:0051439|GO:0016032|GO:0000502|GO:0005838	NP_002802	Proteasome (prosome, macropain) 26S subunit, non-ATPase, 7
ASHG19A3A002859	1135.11	1325.03	10.0636	10.4583	coding	NM_001145724	HOMER3	RefSeq_coding	1297	chr19	-	19040009	19049858		TGCCTCTGAACAGCATCTGACACAGGTGCCCCCGAGCCCTCTCGTCAGTGCCAACGGCCC	9454	Hs.720208	GO:0008022|GO:0005515|GO:0019904|GO:0007216|GO:0006605|GO:0030054|GO:0005575|GO:0005737|GO:0005886|GO:0014069|GO:0045211|GO:0045202	NP_004829	Homer homolog 3 (Drosophila)
ASHG19A3A025171	13565.8	14366.5	13.6555	13.8803	coding	NM_178557	NAT8L	RefSeq_coding	5894	chr4	+	2061238	2070815		TGCCCCTCCCCTGAATGGCCCCCAATGCTGCTGTTTTTCAATAAAACCAGAGTTGAAGGC	339983	Hs.318529	GO:0008415|GO:0017188|GO:0016740|GO:0008152|GO:0005737|GO:0016021|GO:0016020|GO:0005792|GO:0031966|GO:0030867	NP_848652	N-acetyltransferase 8-like (GCN5-related, putative)
ASHG19A3A010852	1677.95	1501.25	10.6297	10.6337	coding	NM_016199	LSM7	RefSeq_coding	536	chr19	-	2321521	2328614		GAAAAAGGAGAGCATCTTGGACTTGTCCAAGTACATCGACAAGACGATCCGGGTAAAGTT	51690	Hs.512610	GO:0003723|GO:0017070|GO:0005515|GO:0008380|GO:0000398|GO:0005634|GO:0030529	NP_057283	LSM7 homolog, U6 small nuclear RNA associated (S. cerevisiae)
CUST_38_PI426249100	165.18	195.394	7.28458	7.69255	coding	NM_004502_Exon1-	NM_004502	HOX cluster	503	chr17	-	46687880	46688383	NM_004502,	TTTCTAAATATCCAGCCTCAAGTTCGGTTTTCGCTACCGGAGCCTTCCCAGAACAAACTT
ASHG19A3A037594	11737.3	14093.2	13.4437	13.8514	coding	NM_018339	RFK	RefSeq_coding	2707	chr9	-	79000432	79009444		TAGCCATTGCTTTTGAGAATCAGATAGTGTGTTGTTTAGGGGTTAATTGTGTCTATATCT	55312	Hs.37558	GO:0005524|GO:0046872|GO:0000166|GO:0008531|GO:0008531|GO:0016740|GO:0009231|GO:0006766|GO:0006767|GO:0005737|GO:0005829	NP_060809	Riboflavin kinase
ASHG19A3A034228	1254.67	1178.79	10.205	10.2901	coding	NM_020192	C7orf36	RefSeq_coding	907	chr7	+	39606002	39612480		AGGTTATAAGAAAGGTGCAGAAGTCATTTTAAACTATGGACGACTCCGAGGAACATTGAG	57002	Hs.83313		NP_064577	Chromosome 7 open reading frame 36
ASHG19A3A011423	1182	854.818	10.1257	9.82785	coding	NM_152657	GGN	RefSeq_coding	2168	chr19	-	38874991	38878668		AAGCTGGAGCACTACGACTTGCAGGCCACCCATTCCAACTGAGTGTAGTCGGCTCAACAC	199720	Hs.447948	GO:0046983|GO:0030154|GO:0007276|GO:0007275|GO:0008104|GO:0007283|GO:0005737|GO:0005730|GO:0048471	NP_689870	Gametogenetin
ASHG19A3A006263	82.6469	82.0147	6.29043	6.43311	coding	NM_170609	CRISP1	RefSeq_coding	1803	chr6	-	49801978	49834218		CTCTACGTTTGTCACTATTGTCATGACTAACCCCTGCATCTACTATGATGAATACTTCGA	167	Hs.109620	GO:0007342|GO:0005576|GO:0005615	NP_733758	Cysteine-rich secretory protein 1
ASHG19A3A029578	93.1887	91.2394	6.46751	6.58061	coding	NM_033057	OR2B2	RefSeq_coding	1212	chr6	-	27878962	27880174		CAAAAAGCTATATTTGTTTCTGTTGCCTAAACATTTTCATTGAACAAGCCCCCAGAATTG	81697	Hs.307111	GO:0004984|GO:0004872|GO:0050896|GO:0007608|GO:0016021|GO:0005886	NP_149046	Olfactory receptor, family 2, subfamily B, member 2
ASHG19A3A022954	524.379	199.927	8.94057	7.72872	coding	NM_001627	ALCAM	RefSeq_coding	4760	chr3	+	105085712	105295743		GGTTTTCCAAAGCCAGCCATTCAATGGACAATTACTGGCAGTGGAAGCGTCATAAACCAA	214	Hs.591293	GO:0005102|GO:0007411|GO:0007155|GO:0008045|GO:0007165|GO:0030424|GO:0009897|GO:0016021|GO:0016020|GO:0043025	NP_001618	Activated leukocyte cell adhesion molecule
ASHG19A3A038167	2172.28	1163.91	10.9909	10.2739	coding	NM_006753	SURF6	RefSeq_coding	2352	chr9	-	136197552	136203047		AGATAGGATGTGAGGTGAGCATGAGCTTGAGCTGAGAGACAGACACAACAGTATCTGAAA	6838	Hs.274430	GO:0003677|GO:0003723|GO:0042254|GO:0001652|GO:0005730|GO:0044451|GO:0005634	NP_006744	Surfeit 6
ASHG19A3A036314	108.696	108.333	6.69178	6.83915	coding	NM_001164447	FAM90A10	RefSeq_coding	1395	chr8	+	7626498	7629509	NM_018088,NM_001164453,NM_001164448,NM_001136572,ENST00000511144,ENST00000444103,	CCTCTATGAGGACCTTCAGGTTTCCTCCTCCTCAGAGGACAGCGATTCTGACCTGGAGTG	441328	Hs.694406	GO:0003676|GO:0008270	NP_001157919	Family with sequence similarity 90, member A10
ASHG19A3A006693	116.702	92.73	6.78983	6.60669	coding	NM_183415	UBE3B	RefSeq_coding	5404	chr12	+	109915438	109974506		GTGCGGGGACCTCCGGCGAATAAAGAAAAAATAACAAGCTTTTCTGAAGTGAGAAGCTGT	89910	Hs.374067	GO:0016881|GO:0016874|GO:0004842|GO:0006464|GO:0042787|GO:0005622	NP_904324	Ubiquitin protein ligase E3B
ASHG19A3A029012	2784.16	489.385	11.3558	9.03274	coding	NM_032566	SPINK7	RefSeq_coding	566	chr5	+	147691989	147695479		AATCTTGACTGAATGGAGAAAGTTTCTGTGCTACCCCTACAAACCCATGCCTCACTGACA	84651	Hs.244569	GO:0030414|GO:0005515|GO:0004867|GO:0005576	NP_115955	Serine peptidase inhibitor, Kazal type 7 (putative)
ASHG19A3A006822	410.111	296.999	8.58556	8.30168	coding	NM_198883	MTX1	RefSeq_coding	1552	chr1	+	155178489	155183622		GATCATCACCCACCTTCGAAAAGAGGTACATACTTTTTGGATAGACACCAAGAACTACGT	4580	Hs.490874	GO:0005515|GO:0006626|GO:0015031|GO:0016021|GO:0016020|GO:0005743|GO:0005741|GO:0005739	NP_942584	Metaxin 1
ASHG19A3A007002	2192.98	1498.49	11.0034	10.6315	coding	NM_206873	PPP1CA	RefSeq_coding	1356	chr11	-	67165651	67169376		TCGATCATCGGGCGCCTGCTGGAAGGTGACATACACGGCCAGTACTACGACCTTCTGCGA	5499	Hs.183994	GO:0016787|GO:0046872|GO:0005515|GO:0008599|GO:0004722|GO:0005975|GO:0007049|GO:0051301|GO:0005977|GO:0006629|GO:0006470|GO:0019433|GO:0070688|GO:0072357|GO:0005737|GO:0005829|GO:0005730|GO:0005654|GO:0005634	NP_996756	Protein phosphatase 1, catalytic subunit, alpha isozyme
ASHG19A3A032453	8487.82	8352.96	12.9784	13.1003	coding	NM_198097	C7orf28B	RefSeq_coding	1785	chr7	-	6838571	6865861	NM_015622,	ATGAGAATTTTATACAAATACCTTACCACCTCCCTTTTCCCAAGGCACATCGAACCTGAG	221960	Hs.567779	GO:0005765|GO:0016020	NP_932765	Chromosome 7 open reading frame 28B
ASHG19A3A014498	1693.46	3402.52	10.6444	11.8067	coding	NM_019845	RPRM	RefSeq_coding	1496	chr2	-	154333851	154335322		CGGTTTACGCCACAAAAGTGCTCTTGACATCCGTGACACCGTTTTGACTTTTTGTTTTTT	56475	Hs.100890	GO:0005515|GO:0007050|GO:0007346|GO:0005737|GO:0016021|GO:0016020	NP_062819	Reprimo, TP53 dependent G2 arrest mediator candidate
ASHG19A3A034430	696.621	676.067	9.35567	9.48908	coding	NM_001159522	ZNF727	RefSeq_coding	1679	chr7	+	63505820	63538925		TGAGTCCAGTACCCGTCTGTACTATTCCATCTCTTCCGCTCCATTAGCTCCTCGGTGACT	442319	Hs.640774	GO:0003677|GO:0046872|GO:0008270|GO:0006355|GO:0005622|GO:0005634	NP_001152994	Zinc finger protein 727
ASHG19A3A005090	601.302	458.146	9.1355	8.9342	coding	NM_018959	DAZAP1	RefSeq_coding	2185	chr19	+	1407583	1435680		AGCTCAGCCAGACTTCCCCTATGGTCAGTATGCAGGTTACGGGCAGGACTTGAGTGGCTT	26528	Hs.222510	GO:0003723|GO:0000166|GO:0030154|GO:0007275|GO:0007283|GO:0005737|GO:0005730|GO:0005634	NP_733829	DAZ associated protein 1
ASHG19A3A011471	193.847	198.149	7.51521	7.71444	coding	NM_024876	ADCK4	RefSeq_coding	2458	chr19	-	41197433	41222790		TACACGGTTGAATGACAAGTTCAACCTTCCCTAAAACCCCCGGTGACGAGTCCAGCCGCG	79934	Hs.130712	GO:0016301|GO:0004674|GO:0016740|GO:0016021|GO:0016020|GO:0005739	NP_079152	AarF domain containing kinase 4
ASHG19A3A052677	4213.77	2761.41	11.9616	11.5127	coding	NM_001098616	C1orf43	RefSeq_coding	1909	chr1	-	154179182	154193273		TTTTTGTGAAGAGGCAAATCATGCGCTTTGCAATGAAATCTCGAAGGGGACCTCATGTCC	25912	Hs.287471	GO:0050662|GO:0016491|GO:0016021|GO:0016020	NP_620077	Chromosome 1 open reading frame 43
ASHG19A3A006444	5675.86	4285.21	12.3878	12.1387	coding	NM_176805	MRPS11	RefSeq_coding	1053	chr15	+	89010683	89021491		CGGCTCCCAGCCACACCAAGTTCAGCACACAGATCCAGGTAGTCTCTGCTAGTAATGAGC	64963	Hs.111286	GO:0003735|GO:0042769|GO:0006412|GO:0005622|GO:0005763|GO:0005739|GO:0005840	NP_789775	Mitochondrial ribosomal protein S11
ASHG19A3A029246	1539.73	7289.74	10.5007	12.9039	coding	NM_015111	N4BP3	RefSeq_coding	5987	chr5	+	177540555	177553107		CACCTCATGGAAAGAATGAAGAGCCAGAAATAGATTCTATTCTGTAGAAAATCTTACACA	23138	Hs.101761	GO:0005737|GO:0031410|GO:0030659|GO:0016020	NP_055926	NEDD4 binding protein 3
ASHG19A3A047474	14585	19638	13.7645	14.3425	coding	NM_033114	ZCRB1	RefSeq_coding	1844	chr12	-	42705888	42719932		GGGTTGCATTTATTTTATTTTTGGATAAAGACTCTGCACAAAACTGTACCAGGGCAATAA	85437	Hs.496279	GO:0003723|GO:0046872|GO:0000166|GO:0008270|GO:0008380|GO:0006397|GO:0005689|GO:0005654|GO:0005634	NP_149105	Zinc finger CCHC-type and RNA binding motif 1
ASHG19A3A054379	3526.5	4081.97	11.7108	12.0686	coding	NM_030916	PVRL4	RefSeq_coding	3520	chr1	-	161040780	161059385		CTTCGAATGTGGAGCCTGAAGATCTAAGATCCTAACATGTACATTTTATGTAAATATGTG	81607	Hs.492490	GO:0034332|GO:0007155|GO:0034329|GO:0045216|GO:0005912|GO:0030054|GO:0005576|GO:0016021|GO:0005886|GO:0005886	NP_112178	Poliovirus receptor-related 4
ASHG19A3A053120	7397.99	7333.54	12.7735	12.914	coding	NM_005530	IDH3A	RefSeq_coding	2701	chr15	+	78441718	78462883		CTTTTTGACCATGCTGCAAGAATTGAGGCTGCGTGTTTTGCTACAATTAAGGACGGAAAG	3419	Hs.591110	GO:0051287|GO:0004449|GO:0000287|GO:0016491|GO:0016616|GO:0006103|GO:0006734|GO:0005975|GO:0006102|GO:0055114|GO:0006099|GO:0005759|GO:0005739	NP_005521	Isocitrate dehydrogenase 3 (NAD+) alpha
ASHG19A3A016566	161.909	165.576	7.2571	7.45423	coding	NM_144711	KLHL23	RefSeq_coding	2211	chr2	+	170551000	170606438		AAAGTTCAGAGCTACAATTCCGATATCAACGAATGGAGCCTCATCACCTCCAGTCCACAT	493911	Hs.655150	GO:0016787|GO:0046872|GO:0033883|GO:0008152	NP_001186217	Phosphatase, orphan 2
ASHG19A3A009035	106.038	89.8123	6.65624	6.55906	coding	NM_001970	EIF5A	RefSeq_coding	1355	chr17	+	7210855	7215780		TGTCATAGGGCTGCTTGGTTGGTCAGTGGGGAGTCGGCGCCTGCGTACTAAGACCCGTGT	1984	Hs.534314	GO:0003723|GO:0017070|GO:0047485|GO:0005515|GO:0043022|GO:0003746|GO:0044267|GO:0006917|GO:0006406|GO:0006913|GO:0006913|GO:0008612|GO:0008284|GO:0045901|GO:0045905|GO:0043687|GO:0006611|GO:0015031|GO:0006414|GO:0006452|GO:0055085|GO:0005642|GO:0005737|GO:0005829|GO:0005829|GO:0005783|GO:0005789|GO:0016020|GO:0005643|GO:0005634	NP_001961	Eukaryotic translation initiation factor 5A
ASHG19A3A022811	5126.39	3197.82	12.2451	11.7159	coding	NM_018029	FLJ10213	RefSeq_coding	1679	chr3	+	73110809	73112469		GGAGTGTTGGGTGGAATCATAGATCCATGCACTCCTAACATGAACTAATTCTCATTATTT	55096	Hs.658858	GO:0005515	NP_060499	Endogenous Borna-like N element-2
ASHG19A3A003761	1167.76	848.549	10.1075	9.81707	coding	NM_001174156	SAMD8	RefSeq_coding	6782	chr10	+	76871392	76941880		ATGCTGAATTTCTTTGTCACCGAATATACACCAAGAAGCTGGAATTTCTTGCACACTTTA	142891	Hs.727615	GO:0003674|GO:0006629|GO:0006665|GO:0006686|GO:0016021|GO:0016020	NP_653261	Sterile alpha motif domain containing 8
ASHG19A3A053871	202.173	155.418	7.57472	7.36391	coding	NM_032178	SLC7A6OS	RefSeq_coding	1642	chr16	-	68334519	68344868		TGACTATGTGTATGACATTTACTACTTGGAGACGGCCACTCCAGGCTGGATTGAGAACAT	84138	Hs.729520		NP_115554	Solute carrier family 7, member 6 opposite strand
ASHG19A3A012877	23353.7	20407.5	14.4309	14.3994	coding	NM_000146	FTL	RefSeq_coding	889	chr19	+	49468565	49470135	AF119897,AF119895,AF113686,	TTTGTGGTTAGCTCCTTCTTGCCAACCAACCATGAGCTCCCAGATTCGTCAGAATTATTC	2512	Hs.433670	GO:0008199|GO:0042802|GO:0005506|GO:0016491|GO:0005515|GO:0006879|GO:0016044|GO:0006826|GO:0055114|GO:0006892|GO:0005829|GO:0008043	NP_000137	Ferritin, light polypeptide
ASHG19A3A048471	328.851	238.488	8.27522	7.97992	coding	NM_020782	KLHDC5	RefSeq_coding	6477	chr12	+	27933186	27955972		AGTTCTCTGCCTGTGAGTGTAAGGGAAAAATTTATGTCATTGGAGGATACACTACCAGAG	57542	Hs.505104		NP_065833	Kelch domain containing 5
ASHG19A3A005269	1540.62	1922.43	10.5012	11.0037	coding	NM_022443	MLF1	RefSeq_coding	2208	chr3	+	158288952	158324252		AGCAGTTTTGAGGATGACCCCTTCTTCTCTGAGTCCATTCTTGCACACCGAGAAAATATG	4291	Hs.85195	GO:0003677|GO:0005515|GO:0019904|GO:0007049|GO:0007050|GO:0030154|GO:0007275|GO:0002318|GO:0005737|GO:0005737|GO:0005634|GO:0005634	NP_071888	Myeloid leukemia factor 1
ASHG19A3A040840	415.944	225.512	8.60383	7.89827	coding	NM_012274	CXorf27	RefSeq_coding	517	chrX	+	37850069	37850569		GCTGAGGAATATCTGCTGTTGTCATCAACAAGTGCTATTAAAGGATGTAAATCCATGAGT	25763	Hs.122959	GO:0003677	NP_036406	Chromosome X open reading frame 27
ASHG19A3A035649	10200.9	6860.08	13.2404	12.8235	coding	NM_018660	ZNF395	RefSeq_coding	4807	chr8	-	28203103	28243977		CCCATCTGTGAGTTTGTCTTATTGGCGCCTTTTTCCTCAGCTGTCTTCCAAGTATTATTT	55893	Hs.435535	GO:0003677|GO:0046872|GO:0008270|GO:0006355|GO:0005737|GO:0005622|GO:0005634	NP_061130	Zinc finger protein 395
ASHG19A3A054414	264.531	285.365	7.96538	8.24252	coding	NM_001145348	JMJD5	RefSeq_coding	2531	chr16	+	27215295	27233089		TTTATACTCTGCTATATGTGTGTCCGCTGCTTTTAGGCAACCAGCCGCTGCCCCTGGGCC	79831	Hs.145717	GO:0003682|GO:0051864|GO:0046872|GO:0016491|GO:0016702|GO:0000086|GO:0007049|GO:0016568|GO:0070544|GO:0055114|GO:0045893|GO:0005634	NP_079049	Jumonji domain containing 5
ASHG19A3A028702	5168.06	4665.32	12.2588	12.2678	coding	NM_003100	SNX2	RefSeq_coding	2091	chr5	+	122110749	122165800		GTGAACAAGGCTGCCGACGCTGTCAACAAAATGACAATCAAGATGAATGAATCGGATGCA	6643	Hs.713554	GO:0008289|GO:0035091|GO:0005515|GO:0008565|GO:0007154|GO:0006897|GO:0006886|GO:0005737|GO:0031901|GO:0005768|GO:0010008|GO:0016020	NP_003091	Sorting nexin 2
ASHG19A3A048594	2364.84	2057.32	11.1173	11.0965	coding	NM_005171	ATF1	RefSeq_coding	2439	chr12	+	51157818	51214906		TTCTGGAGTTTCTGCTGCTGTCACTTCTATGTCTGTTCCAACTCCCATCTATCAGACTAG	466	Hs.648565	GO:0010843|GO:0005515|GO:0032403|GO:0046982|GO:0003700|GO:0003705|GO:0002755|GO:0002755|GO:0002756|GO:0002756|GO:0008063|GO:0043623|GO:0045087|GO:0048011|GO:0045740|GO:0010976|GO:0045944|GO:0006355|GO:0032025|GO:0014070|GO:0051403|GO:0034130|GO:0034134|GO:0034138|GO:0034142|GO:0002224|GO:0006351|GO:0005654|GO:0005634|GO:0005667	NP_005162	Activating transcription factor 1
ASHG19A3A001604	104.062	142.056	6.62845	7.23057	coding	NM_001083111	GNRH1	RefSeq_coding	1297	chr8	-	25276775	25282556		TTTTTGGCTCTCTGCCTCTAAACAGAATGAAGCCAATTCAAAAACTCCTAGCTGGCCTTA	2796	Hs.82963	GO:0005183|GO:0005179|GO:0006916|GO:0007267|GO:0007565|GO:0007275|GO:0008285|GO:0042698|GO:0010468|GO:0031960|GO:0045471|GO:0007165|GO:0005576|GO:0005576|GO:0005615|GO:0005625	NP_001076580	Gonadotropin-releasing hormone 1 (luteinizing-releasing hormone)
ASHG19A3A017012	185.102	181.67	7.44908	7.58916	coding	NM_001005209	TMEM198	RefSeq_coding	2239	chr2	+	220408744	220415315		GGCACTGCCGGCCCTCGTCTGCATCATGTGCTGTTTGTTTGGAGTCGTCTACTGCTTCTT	130612	Hs.446664	GO:0016021|GO:0016020	NP_001005209	Transmembrane protein 198
ASHG19A3A001918	536.397	780.166	8.97431	9.69794	coding	NM_001114726	PRRT4	RefSeq_coding	2411	chr7	-	127990379	128001739		GGCCTGGGAGGCCCACGTGTACGGGCGATTACACCGTGGACTTCCGCCCGCCCTCCCCAA	401399	Hs.381096	GO:0016021|GO:0016020	NP_001167635	Proline-rich transmembrane protein 4
ASHG19A3A038180	1253.05	1406.41	10.2036	10.5424	coding	NM_007101	SARDH	RefSeq_coding	3398	chr9	-	136528685	136605077		AGAACTTGGGCCACACTCCTTCCTTGCCCTCTTGAGCTCATTCGTCACCCTGTTGGGTGA	1757	Hs.198003	GO:0004047|GO:0050660|GO:0016491|GO:0008480|GO:0006546|GO:0055114|GO:0005737|GO:0005759|GO:0005739	NP_009032	Sarcosine dehydrogenase
ASHG19A3A023432	1079.97	1025.88	9.99307	10.0872	coding	NM_172160	KCNAB1	RefSeq_coding	3715	chr3	+	155838336	156256927		AAAGACAAATCTCCCAAGAAAGCCTCAGAAAACGCTAAAGACAGCAGCCTTAGTCCCTCA	7881	Hs.654519	GO:0016491|GO:0015459|GO:0005244|GO:0005249|GO:0006811|GO:0055114|GO:0006813|GO:0055085|GO:0005737|GO:0016021	NP_751892	Potassium voltage-gated channel, shaker-related subfamily, beta member 1
ASHG19A3A043928	1449.42	1216.71	10.4142	10.3379	coding	NM_003055	SLC18A3	RefSeq_coding	2440	chr10	+	50818346	50820765		TGTGTAGAGCCTGCATCTGTCTGTCCTTCCTTCCATTGCTCCCAGTGCCAAACTTGGGCC	6572	Hs.654374	GO:0042166|GO:0005277|GO:0015870|GO:0007269|GO:0007268|GO:0055085|GO:0030121|GO:0030122|GO:0030424|GO:0043679|GO:0060201|GO:0060201|GO:0031410|GO:0005887|GO:0005624|GO:0005886|GO:0008021	NP_003046	Solute carrier family 18 (vesicular acetylcholine), member 3
ASHG19A3A017989	652.999	619.845	9.25827	9.36482	coding	NM_000915	OXT	RefSeq_coding	512	chr20	+	3052265	3053162		GCTTCCCCCATAGCCACCCCAGAAATGGTGAAAATAAAATAAAGCAGGTTTTTCTCCTCT	5020	Hs.113216	GO:0005179|GO:0005185|GO:0031855|GO:0005515|GO:0042756|GO:0042755|GO:0007204|GO:0007565|GO:0007625|GO:0007507|GO:0042538|GO:0060179|GO:0002125|GO:0042711|GO:0007613|GO:0045776|GO:0003077|GO:0060455|GO:0045777|GO:0045925|GO:0060450|GO:0003079|GO:0010701|GO:0045778|GO:0060406|GO:0032308|GO:0050806|GO:0051965|GO:0070474|GO:0044058|GO:0002027|GO:0051930|GO:0014823|GO:0001975|GO:0051591|GO:0042220|GO:…	NP_000906	Oxytocin, prepropeptide
ASHG19A3A038242	88460.7	86125.7	16.455	16.387	coding	NM_003792	EDF1	RefSeq_coding	658	chr9	-	139756570	139760738		AGCTTGCGGGGGACCCTCCCCAGCCCATTCCTGCTGTCAAACAAACAAAACCTTGCAAAG	8721	Hs.174050	GO:0005516|GO:0004402|GO:0008168|GO:0005515|GO:0043565|GO:0003700|GO:0016563|GO:0003713|GO:0030154|GO:0045446|GO:0007275|GO:0043388|GO:0019216|GO:0006355|GO:0005737|GO:0005737|GO:0005622|GO:0005730|GO:0005634|GO:0005634|GO:0005634|GO:0005669	NP_694880	Endothelial differentiation-related factor 1
ASHG19A3A001971	72.8557	104.517	6.10728	6.78479	coding	NM_001126242	TP73	RefSeq_coding	2673	chr1	+	3607235	3650467		AGCAGCAGCAGCTCCTACAGAGGCCGCCCCGGGATGCTCAACAACCATGGCCACGCAGTG	7161	Hs.697294	GO:0003682|GO:0003684|GO:0003690|GO:0046872|GO:0002039|GO:0010843|GO:0005515|GO:0003700|GO:0016563|GO:0008134|GO:0016564|GO:0042771|GO:0006978|GO:0008630|GO:0007049|GO:0007050|GO:0034644|GO:0033326|GO:0048546|GO:0030900|GO:0021766|GO:0006954|GO:0006298|GO:0031571|GO:0043508|GO:0043524|GO:0000122|GO:0048666|GO:0045793|GO:0043193|GO:0010552|GO:0045893|GO:0009791|GO:0051262|GO:0001836|GO:0006974|GO:…	NP_005418	Tumor protein p73
ASHG19A3A002523	1298.16	901.162	10.2534	9.90035	coding	NM_001142432	MORF4L2	RefSeq_coding	1998	chrX	-	102930427	102943086	NM_001142429,	tgtaaagtaccaggacagtgcatggcacatATACCTGCCTTTCTTTCTAGGTTGTATCTC	9643	Hs.326387	GO:0005515|GO:0006281|GO:0016568|GO:0001558|GO:0005730|GO:0005634	NP_036418	Mortality factor 4 like 2
ASHG19A3A037933	102.224	100.727	6.60413	6.72746	coding	NM_031219	HDHD3	RefSeq_coding	1787	chr9	-	116135697	116138341		GTCTTTTCTCCTGTGCTGTACAGGTTCACCAATTTTTAAAATCCAAATATATCTCATGGT	81932	Hs.7739	GO:0016787|GO:0008967|GO:0005515|GO:0005739	NP_112496	Haloacid dehalogenase-like hydrolase domain containing 3
ASHG19A3A031010	569.288	456.284	9.05384	8.92832	coding	NM_001040280	CD83	RefSeq_coding	2475	chr6	+	14117864	14137146		GAGATTGTCCTGCTGCTGGCTCTGGTTATTTTCTACTTAACACTCATCATTTTCACTTGT	9308	Hs.595133	GO:0006952|GO:0006959|GO:0032713|GO:0043372|GO:0032733|GO:0032743|GO:0014070|GO:0007165|GO:0009897|GO:0005887|GO:0005886	NP_004224	CD83 molecule
ASHG19A3A026308	8353.37	7917.94	12.9533	13.024	coding	NM_003864	SAP30	RefSeq_coding	1126	chr4	+	174292092	174298682		AGAAAAGGGAGTGATGATGATGGAGGTGATTCACCTGTTCAAGATATTGATACCCCAGAG	8819	Hs.591715	GO:0003677|GO:0046872|GO:0005515|GO:0003714|GO:0000122|GO:0000118|GO:0005634	NP_003855	Sin3A-associated protein, 30kDa
ASHG19A3A006350	253.384	256.96	7.90351	8.08982	coding	NM_173087	CAPN3	RefSeq_coding	3040	chr15	+	42651697	42704515		CTCCCTCATGGGCTGCTCCATTGATACAATCATTCCGGTTCAGTATGAGACAAGAATGGC	825	Hs.143261	GO:0005509|GO:0004198|GO:0008234|GO:0008233|GO:0004871|GO:0007517|GO:0006508|GO:0051592|GO:0042493|GO:0045214|GO:0007165|GO:0005737|GO:0005622|GO:0005634	NP_775113	Calpain 3, (p94)
ASHG19A3A031366	2500.4	1765.14	11.1963	10.8772	coding	NM_003782	B3GALT4	RefSeq_coding	1704	chr6	+	33244916	33246604		ATCTGTTTCCTTATACCAGATCCTCAGTCTCACTAAAGACAGCGATATGGGAGACACCCA	8705	Hs.534375	GO:0008499|GO:0008378|GO:0047915|GO:0016757|GO:0006486|GO:0005794|GO:0000139|GO:0016021|GO:0016020	NP_003773	UDP-Gal:betaGlcNAc beta 1,3-galactosyltransferase, polypeptide 4
ASHG19A3A003157	499.588	315.299	8.86717	8.392	coding	NM_001163286	EWSR1	RefSeq_coding	2511	chr22	+	29663997	29696514		AGCCAGCAGCCACTGCACCTACAAGCTATTCCTCTACACAGCCGACTAGTTATGATCAGA	2130	Hs.374477	GO:0003723|GO:0005516|GO:0046872|GO:0000166|GO:0005515|GO:0008270|GO:0005737|GO:0005622|GO:0005634|GO:0005886	NP_053733	Ewing sarcoma breakpoint region 1
CUST_16_PI418767722	53885.8	38139.5	15.7017	15.2743	coding	NM_001536	PRMT1	RefSeq_coding	1386	chr19	+	50180495	50191704	NR_033397,NM_198319,NM_198318,	GGCACATCGTGACTGTGTTTTTCATAACTTATGTTTTTATATGGTTGCATTTACGCCAAT	3276	Hs.20521	GO:0008170|GO:0044020|GO:0008168|GO:0005515|GO:0008276|GO:0016740|GO:0007166|GO:0043985|GO:0001701|GO:0031175|GO:0018216|GO:0006479|GO:0005737|GO:0005829|GO:0005634	NP_938074	Protein arginine methyltransferase 1
ASHG19A3A019022	858.067	543.057	9.65511	9.18198	coding	NM_058180	C21orf58	RefSeq_coding	2991	chr21	-	47721049	47743785		ATTTAATAACTAGGGACACCTGTGTCCACAGCTGTGGCACAGACTCCCACTAAAGAAGTA	54058	Hs.236572		NP_478060	Chromosome 21 open reading frame 58
ASHG19A3A014616	5965.03	3743.49	12.4605	11.9511	coding	NM_007033	RER1	RefSeq_coding	3118	chr1	+	2323213	2336881		CAAGCCTGATGGGGCTGTTTTCTCACAATATAAACGAATAAAGTGTCTTCTGGCCTACTT	11079	Hs.591454	GO:0003674|GO:0006890|GO:0005794|GO:0000139|GO:0030173|GO:0016021|GO:0016020	NP_008964	RER1 retention in endoplasmic reticulum 1 homolog (S. cerevisiae)
ASHG19A3A039854	683.029	542.139	9.32514	9.18015	coding	NM_207672	GRIPAP1	RefSeq_coding	3260	chrX	-	48833334	48858675		CCTAGATGAGATTAACCTGTTTTTTATTCAACTGTTGTCTCTACCTTCCCAATTTGATCA	56850	Hs.109929	GO:0003674|GO:0008150|GO:0005575|GO:0005769	NP_997555	GRIP1 associated protein 1
ASHG19A3A047634	780.042	825.86	9.52023	9.78081	coding	NM_001173467	SP7	RefSeq_coding	3010	chr12	-	53720361	53730004		TCTCCCTGCCAGACCTCCAGAGAGGAGAGACTCGGGACAGCCAGCCCCAGGTTCCCCCAG	121340	Hs.209402	GO:0003677|GO:0046872|GO:0030528|GO:0008270|GO:0001649|GO:0006357|GO:0005622|GO:0005634	NP_690599	Sp7 transcription factor
ASHG19A3A009442	2957.04	2185.27	11.4376	11.1847	coding	NM_032351	MRPL45	RefSeq_coding	1713	chr17	+	36452997	36479100	uc002ilp.1,	AAAGCAGGATTGGTTATTCCTCCAGAAAAATCGGACCGTTCCATACATCTGGCCTGTACA	84311	Hs.462913	GO:0015450|GO:0003735|GO:0006886|GO:0006412|GO:0005744|GO:0005739|GO:0005739|GO:0005840	NP_115727	Mitochondrial ribosomal protein L45
ASHG19A3A003516	74.5582	108.69	6.14163	6.84361	coding	NM_001170687	MIB2	RefSeq_coding	3308	chr1	+	1550794	1565990	NM_001170689,	GGCGGGCGACTGGACGGCCGGACAGGTCCCGAGCAGCCCCGCCCAACATGGACCCAGACC	142678	Hs.135805	GO:0003779|GO:0016874|GO:0046872|GO:0004871|GO:0004842|GO:0008270|GO:0007219|GO:0043123|GO:0007165|GO:0005737|GO:0005768	NP_543151	Mindbomb homolog 2 (Drosophila)
ASHG19A3A035391	4326.99	4622.94	12.0065	12.2509	coding	NM_001427	EN2	RefSeq_coding	3405	chr7	+	155250823	155257520		ACCCCCACCCCCGCATTTTTGTGTGTTGAAATTCTTGAAGGTTACATTAAATAAAACAAA	2020	Hs.134989	GO:0043565|GO:0003700|GO:0030528|GO:0030902|GO:0030901|GO:0007275|GO:0048666|GO:0045944|GO:0006355|GO:0005634	NP_001418	Engrailed homeobox 2
ASHG19A3A031505	639.368	2072.28	9.22464	11.1082	coding	NM_176823	S100A7A	RefSeq_coding	4279	chr1	+	153388999	153395701	NM_002963,	TAGGCATGATCGACATGTTTCACAAATACACCGGACGTGATGGCAAGATTGAGAAGCCAA	338324	Hs.442337	GO:0005509|GO:0005737	NP_789793	S100 calcium binding protein A7A
ASHG19A3A018429	9982.51	10758.5	13.2147	13.4639	coding	NM_018683	RNF114	RefSeq_coding	2478	chr20	+	48552913	48570420		ACCAGAATTACATCATGGAAGGTGTGAAGGCCACCATTAAGGATGCATCTCTTCAGCCAA	55905	Hs.144949	GO:0046872|GO:0008270|GO:0030154|GO:0007275|GO:0007283|GO:0005622	NP_061153	Ring finger protein 114
ASHG19A3A047702	242.432	70.8562	7.83653	6.22569	coding	NM_003920	TIMELESS	RefSeq_coding	5154	chr12	-	56810156	56843200		TTTTTGCACTGGCTGCAGTCAACCAAAAAGCCTTTGTGGAGCTGTTGTTCTGGAAGAACA	8914	Hs.118631	GO:0005515|GO:0046982|GO:0042803|GO:0048754|GO:0007049|GO:0051301|GO:0007623|GO:0009582|GO:0009790|GO:0030324|GO:0007067|GO:0002009|GO:0010553|GO:0033261|GO:0042127|GO:0006974|GO:0009628|GO:0000790|GO:0005634	NP_003911	Timeless homolog (Drosophila)
ASHG19A3A040615	1507.6	1594.73	10.4726	10.7248	coding	NM_171998	RAB39B	RefSeq_coding	3499	chrX	-	154487526	154493852		GTACCATTGTCACTGCAATAAGTGGGTTTTAGAAAATAAGTGTGAAAAGAATCAGGTGTT	116442	Hs.632832	GO:0005525|GO:0000166|GO:0015031|GO:0007264|GO:0050808|GO:0016192|GO:0005794|GO:0005737|GO:0005622|GO:0005886	NP_741995	RAB39B, member RAS oncogene family
ASHG19A3A047144	105.424	206.137	6.64794	7.77317	coding	NM_021978	ST14	RefSeq_coding	3319	chr11	+	130029681	130080256		AAATGAGAATTTTGTGGATGCCTACGAGAACTCCAACTCCACTGAGTTTGTAAGCCTGGC	6768	Hs.504315	GO:0008233|GO:0004252|GO:0008236|GO:0006508|GO:0016323|GO:0005576|GO:0005615|GO:0019897|GO:0005887|GO:0005886	NP_068813	Suppression of tumorigenicity 14 (colon carcinoma)
ASHG19A3A007899	1054.11	1128.38	9.95957	10.2272	coding	NM_004853	STX8	RefSeq_coding	988	chr17	-	9153788	9479275		AACTCGAGAGAGACTACTTCTGGCATCCTTTAAGAATGAGGGTGCCGAACCAGATCTAAT	9482	Hs.431109	GO:0031625|GO:0006810|GO:0005783|GO:0005887|GO:0016020	NP_004844	Syntaxin 8
ASHG19A3A037910	232.146	297.188	7.77317	8.30348	coding	NM_001163788	ROD1	RefSeq_coding	7237	chr9	-	114980714	115095944		ATAATAATGACAAAAGCAGAGACTTCACTCGCTTAGACCTTCCTACTGGTGATGGCCAGC	9991	Hs.269988	GO:0003723|GO:0000166|GO:0009653|GO:0006397|GO:0045595|GO:0005634	NP_005147	ROD1 regulator of differentiation 1 (S. pombe)
ASHG19A3A004343	651.995	692.582	9.2566	9.52446	coding	NM_004875	POLR1C	RefSeq_coding	1138	chr6	+	43484790	43497114		GCCCGGGTTCGAGATCATTATATCTGTAAGAAAGATTTGCTGGCTGCGGTGGCTCACACC	9533	Hs.727715	GO:0003677|GO:0003899|GO:0005515|GO:0046983|GO:0006363|GO:0006362|GO:0006360|GO:0006361|GO:0005736|GO:0005654|GO:0005654|GO:0005634	NP_976035	Polymerase (RNA) I polypeptide C, 30kDa
ASHG19A3A002592	67.6176	85.2318	5.99956	6.48667	coding	NM_001144943	RAB34	RefSeq_coding	1333	chr17	-	27041298	27045286	NM_001142625,NM_001142624,	GATTCCCCATCACCAATTCGGCTGGGGCGCCCTGCAAGGCCGCAGGCAGGATGAACATTC	83871	Hs.301853	GO:0005525|GO:0003924|GO:0019001|GO:0000166|GO:0006897|GO:0015031|GO:0007264|GO:0005794|GO:0005737|GO:0005769|GO:0001726	NP_114140	RAB34, member RAS oncogene family
ASHG19A3A005064	90.0824	94.0187	6.41615	6.62795	coding	NM_018904	PCDHA13	RefSeq_coding	5260	chr5	+	140261853	140391929		AGGAGGACTCAGAATGCTTGAAAGAGCCACGACAGCCCAACCCTGACTGGCGTTACTCTG	56117	Hs.199343			Protocadherin alpha cluster, complex locus
ASHG19A3A027586	2216.89	1779.29	11.0212	10.8868	coding	NM_001025070	RPS14	RefSeq_coding	787	chr5	-	149823793	149829319		GGATTGAGTTCGTTCCTGGTCTCAGAAGGCCCGTTTTGCTTTCAGGGAGGAGCTTGTGAA	6208	Hs.725969	GO:0003723|GO:0048027|GO:0005515|GO:0003735|GO:0045182|GO:0044267|GO:0031018|GO:0030218|GO:0010467|GO:0030490|GO:0000122|GO:0006417|GO:0000028|GO:0000028|GO:0006412|GO:0006412|GO:0006412|GO:0006414|GO:0006415|GO:0019058|GO:0016032|GO:0019083|GO:0005829|GO:0005829|GO:0022627|GO:0005622|GO:0005730|GO:0005840	NP_005608	Ribosomal protein S14
ASHG19A3A002363	1334.47	1652.59	10.2956	10.778	coding	NM_001135822	FDPS	RefSeq_coding	1357	chr1	+	155278538	155290457		AGCAGGAATCCGTATCTGGGAACAGAATGAACGGAGACCAGAATTCAGATGTTTATGCCC	2224	Hs.335918	GO:0004161|GO:0004337|GO:0046872|GO:0016740|GO:0006695|GO:0044419|GO:0008299|GO:0005737|GO:0005829|GO:0005730|GO:0005634	NP_001995	Farnesyl diphosphate synthase
ASHG19A3A023863	100.969	91.3376	6.58709	6.58211	coding	NM_003703	NOP14	RefSeq_coding	2939	chr4	-	2939663	2965118		TTTATTTGAAAATCACTGGGCTGCTATTTCCAACTTCCGACTTCTGGCACCCAGTGGTGA	8602	Hs.627133	GO:0030515|GO:0000480|GO:0000447|GO:0000472|GO:0000462|GO:0006364|GO:0042274|GO:0030686|GO:0030692|GO:0005739|GO:0005730|GO:0005634|GO:0032040	NP_003694	NOP14 nucleolar protein homolog (yeast)
ASHG19A3A035658	427.185	297.578	8.64579	8.30604	coding	NM_057158	DUSP4	RefSeq_coding	3404	chr8	-	29193616	29206322		TGGAGTCTGGATTTGTTTTGTTGTGTTTTGCTTTCCTTCCTGGAAGAAATCCCGAGGGGA	1846	Hs.417962	GO:0017017|GO:0016787|GO:0004725|GO:0008330|GO:0000165|GO:0002755|GO:0002755|GO:0002756|GO:0002756|GO:0008063|GO:0001706|GO:0000188|GO:0045087|GO:0048011|GO:0006470|GO:0051403|GO:0034130|GO:0034134|GO:0034138|GO:0034142|GO:0002224|GO:0005654|GO:0005634	NP_476499	Dual specificity phosphatase 4
ASHG19A3A011486	383.332	307.815	8.49366	8.3574	coding	NM_001167868	ATP5SL	RefSeq_coding	1619	chr19	-	41937223	41945481	NM_001167867,	GAGCTTGGAAGGGATTGTTCGAGGATGTGGGATTTGGTCTTAGAAGACCGAAGGATGAAT	55101	Hs.728825	GO:0005739	NP_060505	ATP5S-like
ASHG19A3A034551	119.967	124.603	6.82727	7.0447	coding	NM_033000	GTF2I	RefSeq_coding	4469	chr7	+	74072029	74175020	NM_032999,	CTACTCAACATGTCCCTTCAGAAACAAGTGAGGACCCTGAAGTTGAGGTGACTATTGAAG	2969	Hs.647041	GO:0003677|GO:0016251|GO:0051019|GO:0005515|GO:0003700|GO:0009790|GO:0007165|GO:0006367|GO:0006351|GO:0042995|GO:0005737|GO:0043025|GO:0005730|GO:0005634	NP_127494	General transcription factor IIi
ASHG19A3A040556	76.697	96.695	6.18124	6.66705	coding	NM_001135740	PNCK	RefSeq_coding	1522	chrX	-	152935189	152938743		GTAGGCCTGGGATGTGGAGGCGTGTATGCGGTGGCCTCGCTGGGAGGCGTCCGTCTGGGG	139728	Hs.436667	GO:0005524|GO:0005516|GO:0004683|GO:0000166|GO:0016740|GO:0006468|GO:0005737|GO:0005634	NP_001129212	Pregnancy up-regulated non-ubiquitously expressed CaM kinase
ASHG19A3A024554	92.6429	131.141	6.46002	7.11797	coding	NM_181889	UBE2D3	RefSeq_coding	2233	chr4	-	103717133	103749307		AAGTCATTGCAGAGCTACCGCTTCGGTTAGCCAGCCACGAAGTTCTCGCGAGAGTCGTCT	7323	Hs.518773	GO:0005524|GO:0016881|GO:0016874|GO:0000166|GO:0005515|GO:0004842|GO:0030509|GO:0006281|GO:0006915|GO:0032480|GO:0043687|GO:0043161|GO:0070979|GO:0070936|GO:0006464|GO:0006513|GO:0000209|GO:0016567|GO:0016567|GO:0007179|GO:0006511|GO:0005768|GO:0010008|GO:0005886	NP_871622	Ubiquitin-conjugating enzyme E2D 3 (UBC4/5 homolog, yeast)
ASHG19A3A011444	129974	128294	17.0153	16.9521	coding	NM_001020	RPS16	RefSeq_coding	603	chr19	-	39923848	39926618		CGATAAGCCCATCGTGACTCAAAACTCACTTGTATAATAAACAGTTTTTGAGGGATTTTA	6217	Hs.397609	GO:0003723|GO:0005515|GO:0003735|GO:0044267|GO:0031018|GO:0010467|GO:0006364|GO:0042274|GO:0006412|GO:0006412|GO:0006412|GO:0006414|GO:0006415|GO:0019058|GO:0016032|GO:0019083|GO:0005829|GO:0005829|GO:0022627|GO:0022627|GO:0005622|GO:0015935	NP_001011	Ribosomal protein S16
ASHG19A3A002376	215.073	84.0581	7.66605	6.46801	coding	NM_001135954	UCK1	RefSeq_coding	2096	chr9	-	134399183	134406662		TCCGACGTCAGGCTGTCTCGAAGAGACAAAGAAGTATGCCGATGTGATCATCCCGCGAGG	83549	Hs.9597	GO:0005524|GO:0016301|GO:0019206|GO:0000166|GO:0016773|GO:0016740|GO:0004849|GO:0008152|GO:0055086|GO:0006206|GO:0043097|GO:0005829	NP_113620	Uridine-cytidine kinase 1
ASHG19A3A011436	255.226	211.92	7.91447	7.81285	coding	NM_001080468	SYCN	RefSeq_coding	482	chr19	-	39693561	39694906		AGCTGATGCATTGCTGGTCTCTCATCTGCAGCTTCCACAGAGTGCCAAGCCCCTCACTCA	342898	Hs.124123	GO:0006887|GO:0031410|GO:0016020|GO:0030667|GO:0030658	NP_001073937	Syncollin
ASHG19A3A028824	276.151	250.111	8.02617	8.05058	coding	NM_178019	CATSPER3	RefSeq_coding	1367	chr5	+	134303595	134347397		TATGTTTTTACCCTATGCCCTCCGCCAGCTCATGGGCAAACAGTTCACTTACCTGTATAT	347732	Hs.631804	GO:0005227|GO:0005262|GO:0005244|GO:0030154|GO:0001539|GO:0006811|GO:0007275|GO:0006814|GO:0030317|GO:0007283|GO:0055085|GO:0001669|GO:0005929|GO:0005783|GO:0020017|GO:0019861|GO:0016021|GO:0005886	NP_821138	Cation channel, sperm associated 3
ASHG19A3A022684	82.5233	71.7164	6.28889	6.24248	coding	NM_206825	GNL3	RefSeq_coding	2159	chr3	+	52719935	52728508		GTCTGGAAGTTGCTGCAGCCACCACGACGCTCTTCTACGGCTACGGCTTTGTCTCTGCTG	26354	Hs.313544	GO:0005525|GO:0000166|GO:0005515|GO:0042127|GO:0005622|GO:0005730|GO:0005634	NP_996562	Guanine nucleotide binding protein-like 3 (nucleolar)
ASHG19A3A000929	156.07	104.397	7.20418	6.78274	coding	NM_001010974	BCAS4	RefSeq_coding	1136	chr20	+	49411466	49493713		CTATGCCAAAGTGGACCGGCTAGAGAAGTCACCTGCACCGGTGCCCGTGACGTACGAGCT	55653	Hs.381178	GO:0005737	NP_942094	Breast carcinoma amplified sequence 4
ASHG19A3A006601	1958.79	1742.6	10.8444	10.8583	coding	NM_181893	UBE2D3	RefSeq_coding	2006	chr4	-	103717133	103790003		ATGCTTTCTAACCGAAAGTGCCTTTCAAAAGAACTTAGTGATTTGGCCCGTGACCCTCCA	7323	Hs.518773	GO:0005524|GO:0016881|GO:0016874|GO:0000166|GO:0005515|GO:0004842|GO:0030509|GO:0006281|GO:0006915|GO:0032480|GO:0043687|GO:0043161|GO:0070979|GO:0070936|GO:0006464|GO:0006513|GO:0000209|GO:0016567|GO:0016567|GO:0007179|GO:0006511|GO:0005768|GO:0010008|GO:0005886	NP_871622	Ubiquitin-conjugating enzyme E2D 3 (UBC4/5 homolog, yeast)
ASHG19A3A020088	127.05	116.02	6.91021	6.93821	coding	NM_001178010	CDC45	RefSeq_coding	2036	chr22	+	19467413	19508134		AGAAGAGCTCCAGGTTGTTCGCCGGTCCCATGAGTGACAGGACAGCCCCAAGGTCTCCCA	8318	Hs.474217	GO:0005515|GO:0006260|GO:0000076|GO:0006271|GO:0006270|GO:0000082|GO:0000216|GO:0000084|GO:0000075|GO:0000278|GO:0000083|GO:0005813|GO:0005737|GO:0005654|GO:0005654|GO:0005634	NP_003495	Cell division cycle 45 homolog (S. cerevisiae)
ASHG19A3A026356	107.727	70.3909	6.6802	6.21635	coding	NM_017632	CDKN2AIP	RefSeq_coding	2391	chr4	+	184365788	184369049		ATACAACAAGAGATGAACTGGTTGCCAAGGTGAAGAAAAGAGGGATATCGAGTAGCAATG	55602	Hs.644077	GO:0003725|GO:0002039|GO:0005515|GO:0030308|GO:0009967|GO:0031647|GO:0001652|GO:0005622|GO:0005730|GO:0005654|GO:0005634	NP_060102	CDKN2A interacting protein
ASHG19A3A020773	567.861	405.704	9.05021	8.75917	coding	NM_005677	COLQ	RefSeq_coding	3007	chr3	-	15491640	15563258	NM_080539,	ATTTATCTTCAGCTTTTCTTCCTCTCTATCGTGTCTCAGCCGACTTTCATCAACAGCGTT	8292	Hs.146735	GO:0001507|GO:0008105|GO:0042135|GO:0005605|GO:0030054|GO:0005615|GO:0045202	NP_536800	Collagen-like tail subunit (single strand of homotrimer) of asymmetric acetylcholinesterase
ASHG19A3A053948	152.549	136.667	7.17154	7.17622	coding	NM_001170716	BCAR1	RefSeq_coding	3195	chr16	-	75262928	75300707		ACCCACCGTCCCCAGGAAGCAGAACAGAGGGGTCGGACCCCTGGTCCTTCCTTTGAGTGG	9564	Hs.479747	GO:0017124|GO:0005515|GO:0019901|GO:0019903|GO:0004871|GO:0050853|GO:0007186|GO:0007186|GO:0050852|GO:0007015|GO:0050851|GO:0007596|GO:0007155|GO:0051301|GO:0016477|GO:0008283|GO:0007173|GO:0008286|GO:0007229|GO:0048011|GO:0048008|GO:0030335|GO:0042981|GO:0001558|GO:0007165|GO:0030054|GO:0005737|GO:0005829|GO:0005829|GO:0005925|GO:0005624|GO:0001726	NP_055382	Breast cancer anti-estrogen resistance 1
ASHG19A3A041711	159.436	164.548	7.23614	7.44466	coding	NM_001178113	ZNF185	RefSeq_coding	3897	chrX	+	152086408	152142024		GGCCAAATCTGGAGGCAGGAGGGAGCCTGCAGGTAGACACATGGAACCTTCTCCTCTCTA	7739	Hs.16622	GO:0046872|GO:0008270|GO:0030054|GO:0005737|GO:0005856|GO:0005925	NP_009081	Zinc finger protein 185 (LIM domain)
ASHG19A3A008821	155.987	186.543	7.20272	7.62613	coding	NM_134268	CYGB	RefSeq_coding	1951	chr17	-	74523439	74533782		CTAGTTTCTGATGTTTGTAACCAGACCCAGCTGTGTCATTAAACAGACCCGTTCTTGCTG	114757	Hs.95120	GO:0020037|GO:0046872|GO:0019825|GO:0005344|GO:0004601|GO:0015671|GO:0006979|GO:0006810|GO:0005737	NP_599030	Cytoglobin
ASHG19A3A021384	224.758	196.17	7.7268	7.69904	coding	NM_020890	KIAA1524	RefSeq_coding	4284	chr3	-	108268719	108308491		ATCTTTTGGAAACAAAAGCTCTAGCCCTTGCACAGGCTGATAGACTGATTGCTCAGCATC	57650	Hs.591308	GO:0005515|GO:0005737|GO:0016021|GO:0016020	NP_065941	KIAA1524
ASHG19A3A015070	1373.64	887.074	10.3359	9.87621	coding	NM_005544	IRS1	RefSeq_coding	8743	chr2	-	227596033	227663506		ATGGTCTTAACTACATAGACCTGGATTTGGTCAAGGACTTCAAACAGTGCCCTCAGGAGT	3667	Hs.471508	GO:0042169|GO:0005158|GO:0005010|GO:0005159|GO:0043548|GO:0043548|GO:0005515|GO:0005080|GO:0004871|GO:0005068|GO:0032869|GO:0008543|GO:0042593|GO:0008286|GO:0008286|GO:0008286|GO:0008286|GO:0048009|GO:0030879|GO:0046627|GO:0046676|GO:0090275|GO:0048011|GO:0014065|GO:0048015|GO:0030335|GO:0008284|GO:0032000|GO:0070094|GO:0046326|GO:0010907|GO:0045725|GO:0045725|GO:0046628|GO:0002053|GO:0043552|GO:…	NP_005535	Insulin receptor substrate 1
ASHG19A3A018071	211.856	173.928	7.64616	7.52658	coding	NM_080676	MACROD2	RefSeq_coding	4863	chr20	+	13976145	16033839		TATATTCCCCTGAACAGCATTCTATCATGGAAGGAGGAGATGAAGGGCAAGGGCCAAAAT	140733	Hs.661576	GO:0003674|GO:0008150|GO:0005575	NP_542407	MACRO domain containing 2
ASHG19A3A046632	94.124	91.106	6.48272	6.57887	coding	NM_005700	DPP3	RefSeq_coding	2694	chr11	+	66247879	66277130		TTTACTCCAACATGGGCAACTACAAGTCCTTTGGTGACACCAAGTTTGTTCCCAACTTGC	10072	Hs.502914	GO:0004177|GO:0008239|GO:0046872|GO:0008237|GO:0008233|GO:0006508|GO:0005737	NP_569710	Dipeptidyl-peptidase 3
ASHG19A3A051246	358.475	324.881	8.39557	8.43448	coding	NM_006683	EDDM3A	RefSeq_coding	879	chr14	+	21214098	21216538		GATATTGACTCTCTTTATACCTACCCAAGCTGAACGACCCTCCTTTTCTTAAATAAAATA	10876	Hs.304757	GO:0007321|GO:0005576|GO:0005615	NP_006674	Epididymal protein 3A
ASHG19A3A021219	99681.2	110595	16.6114	16.7429	coding	NM_025075	THOC7	RefSeq_coding	1028	chr3	-	63819546	63849597		AGCCATAGACAGGCTAATTGCCCACCACTCCCAGGAATATTGAAATAGCTACATGACCAT	80145	Hs.288151	GO:0003723|GO:0005515|GO:0008380|GO:0046784|GO:0006406|GO:0006397|GO:0006810|GO:0000347|GO:0000445|GO:0005737|GO:0005634|GO:0000346	NP_079351	THO complex 7 homolog (Drosophila)
ASHG19A3A047524	450.603	434.497	8.7246	8.86015	coding	NM_015401	HDAC7	RefSeq_coding	4301	chr12	-	48176508	48213763		GCCTTGCCGACAGTGTCCTTGCTGCCCGCAATCACTCTGGGGCTGCCCGCCCCTGCCAGG	51564	Hs.200063	GO:0032041|GO:0046969|GO:0046970|GO:0034739|GO:0016787|GO:0005080|GO:0070491|GO:0016568|GO:0032703|GO:0045668|GO:0090050|GO:0005737|GO:0000118|GO:0005634	NP_056216	Histone deacetylase 7
ASHG19A3A048724	131.857	163.75	6.96154	7.43773	coding	NM_001135195	SLC39A5	RefSeq_coding	1985	chr12	+	56624500	56631627		TATGTGACGTGGCCTCCGATCCACCTGGACACCTGGAGGCTAAGCCTGGATTCCCCCTTC	283375	Hs.591018	GO:0046873|GO:0006811|GO:0055085|GO:0006829|GO:0016323|GO:0016021|GO:0005886	NP_775867	Solute carrier family 39 (metal ion transporter), member 5
ASHG19A3A031662	266.17	482.756	7.97474	9.01059	coding	NM_004282	BAG2	RefSeq_coding	2068	chr6	+	57037103	57050010		ATCCTTCTGGAAATGATCCACAGTATCCAAAATAGCCAGGACATGAGGCAGATCAGTGAC	9532	Hs.729098	GO:0005515|GO:0006915|GO:0006457|GO:0019538	NP_004273	BCL2-associated athanogene 2
ASHG19A3A001785	268.968	331.878	7.99	8.46506	coding	NM_001100590	KIAA0232	RefSeq_coding	7789	chr4	+	6784458	6885897		ggccgccgcgccgcccggcAGCCTCGGCAGGTTCTGCCGGAGACTTCCATTTGGCCTCAA	9778	Hs.79276	GO:0005524|GO:0000166	NP_055558	KIAA0232
ASHG19A3A002245	2168.46	2246.44	10.9886	11.2246	coding	NM_001134388	ZDHHC4	RefSeq_coding	1479	chr7	+	6617064	6628609		AGGCGCCGGAGCCCAGCGGCTGGCGGGCCGCCGTCCCACCCCCACCTCGCCCGAGTCCGG	55146	Hs.5268	GO:0008415|GO:0046872|GO:0016740|GO:0008270|GO:0016021|GO:0016020	NP_060576	Zinc finger, DHHC-type containing 4
ASHG19A3A037182	91.6204	75.6497	6.44334	6.32012	coding	NM_002172	IFNA14	RefSeq_coding	778	chr9	-	21239201	21239978		AGACTCACTTCTCCTATAACCACCACAAGTTGAATCAAAATTTTCAAATGTTTTCAGGAG	3448	Hs.93907	GO:0005125|GO:0005126|GO:0007596|GO:0019221|GO:0006952|GO:0060338|GO:0009615|GO:0060337|GO:0005576|GO:0005576|GO:0005615	NP_002163	Interferon, alpha 14
ASHG19A3A009306	158.944	111.426	7.23201	6.87839	coding	NM_144977	DENND1B	RefSeq_coding	2380	chr1	-	197521384	197744623		CGATTGTAGTGGTGTATAGTCTTGACTTGCAGAGCATTTTGCTTGAGTCCTTGAAATGTC	163486	Hs.125056	GO:0005085|GO:0030136|GO:0005737|GO:0031410|GO:0005829	NP_659414	DENN/MADD domain containing 1B
ASHG19A3A019986	312.602	294.108	8.20108	8.28785	coding	NM_178548	TFAP2E	RefSeq_coding	2189	chr1	+	36038970	36060925		AAATTGATAAATCAGAGGTGCTACTGAGGAGTTGGTGCCCCTCATTCCAGAATCTCCTAC	339488	Hs.567844	GO:0003677|GO:0046982|GO:0042803|GO:0003700|GO:0045944|GO:0006355|GO:0005634	NP_848643	Transcription factor AP-2 epsilon (activating enhancer binding protein 2 epsilon)
ASHG19A3A043193	260.555	174.911	7.94125	7.5339	coding	NM_031212	SLC25A28	RefSeq_coding	1584	chr10	-	101370274	101380221		AGTTAAAAAAGACATTGAGTGATGTAATCCACCCTGGGGGCAATAGCCATATTGCCAATG	81894	Hs.403790	GO:0006811|GO:0006826|GO:0016021|GO:0016020|GO:0005743|GO:0005739	NP_112489	Solute carrier family 25, member 28
ASHG19A3A017623	578.821	681.654	9.07959	9.50122	coding	NM_016558	SCAND1	RefSeq_coding	916	chr20	-	34541545	34542428		TCCGACTCCCTCAAGGGTGACGCGAGCTCTGCCCTTTAACCGGAAACGTCTCCCTGCTCA	51282	Hs.584909	GO:0042802|GO:0003700|GO:0006355|GO:0006351|GO:0016032|GO:0005634	NP_361012	SCAN domain containing 1
ASHG19A3A044487	2519.3	2435.27	11.2076	11.3362	coding	NM_001134363	RBM20	RefSeq_coding	7233	chr10	+	112404154	112599227		GCCCCCCTCCACTTGCCGCATATCTGTAGCATCTGTGACAAGAAGGTGTTTGATTTGAAG	282996	Hs.116630	GO:0003723|GO:0000166|GO:0008270|GO:0005622|GO:0005634	NP_001127835	RNA binding motif protein 20
ASHG19A3A045946	1726.41	1192.75	10.6732	10.3082	coding	NM_018982	YIPF1	RefSeq_coding	1876	chr1	-	54317406	54355453		ATAACCGACGCGTTGCATTGGCCACAATTGTGACAATTGTGTTGCTCCATATGCTGCTTT	54432	Hs.11923	GO:0016021|GO:0016020|GO:0030133	NP_061855	Yip1 domain family, member 1
ASHG19A3A013177	325.301	261.533	8.25893	8.11678	coding	NM_005762	TRIM28	RefSeq_coding	2989	chr19	+	59055835	59062082		ATTGCAACGTACACAAGCATGAACCCCTTGTGCTGTTTTGTGAGAGCTGTGATACTCTCA	10155	Hs.467408	GO:0070087|GO:0046872|GO:0005515|GO:0004672|GO:0043565|GO:0003700|GO:0003713|GO:0003714|GO:0016564|GO:0008270|GO:0001837|GO:0010467|GO:0000122|GO:0043193|GO:0046777|GO:0006357|GO:0006351|GO:0006351|GO:0000785|GO:0005622|GO:0005719|GO:0005720|GO:0005730|GO:0005654|GO:0005634	NP_005753	Tripartite motif-containing 28
ASHG19A3A001608	240.032	74.1845	7.82114	6.29145	coding	NM_001083585	RABEP1	RefSeq_coding	5322	chr17	+	5185557	5289131		AGAAAGAATAAAAGTGGAAAAAGGACAGGCTACCGTTGAACAACTAATGTTTGAAGAGAA	9135	Hs.592121	GO:0005096|GO:0008083|GO:0005515|GO:0042803|GO:0006915|GO:0006944|GO:0006897|GO:0015031|GO:0005813|GO:0005737|GO:0016023|GO:0005769|GO:0055037	NP_004694	Rabaptin, RAB GTPase binding effector protein 1
ASHG19A3A044124	99.4274	85.225	6.56612	6.4866	coding	NM_014000	VCL	RefSeq_coding	5647	chr10	+	75757871	75879912		TACGAACCTGAGCTGCTGTTAATGCCATCCAATCAGCCGGTCAACCAGCCCATTCTGGCC	7414	Hs.643896	GO:0017048|GO:0003779|GO:0045294|GO:0008013|GO:0002166|GO:0045296|GO:0005515|GO:0005198|GO:0034333|GO:0043297|GO:0007596|GO:0007155|GO:0007160|GO:0006928|GO:0090136|GO:0030032|GO:0002009|GO:0006936|GO:0030336|GO:0030168|GO:0002576|GO:0034394|GO:0005884|GO:0005912|GO:0005913|GO:0005911|GO:0030055|GO:0043034|GO:0043034|GO:0005737|GO:0005856|GO:0005829|GO:0005829|GO:0005576|GO:0005916|GO:0005925|GO:…	NP_054706	Vinculin
ASHG19A3A033115	3057.21	3485.97	11.4933	11.8433	coding	NM_001142749	KIAA1324L	RefSeq_coding	6855	chr7	-	86506224	86689014		GCGGCCTGGGCTGGGGACCTGCCCTCCTCCTCCAGCCGCCCGCTTCCTCCTTGCCAGGAG	222223	Hs.208093	GO:0016021|GO:0016020	NP_689961	KIAA1324-like
ASHG19A3A053105	1184.8	1188.68	10.1287	10.3033	coding	NM_003978	PSTPIP1	RefSeq_coding	1870	chr15	+	77287464	77329671		ATTTTGCTGCTGATTCTAGCCCCAAACAAAACAGGTTGAGCTTTTTCCTCCCCTCAGAAG	9051	Hs.129758	GO:0003779|GO:0003824|GO:0005515|GO:0019903|GO:0007155|GO:0007165|GO:0005826|GO:0032154|GO:0005737|GO:0005856|GO:0030027|GO:0048471|GO:0001725	NP_003969	Proline-serine-threonine phosphatase interacting protein 1
ASHG19A3A034574	96.8066	76.9836	6.52677	6.34668	coding	NM_000941	POR	RefSeq_coding	2509	chr7	+	75544419	75616172		CTGGTTCCTCTTCAGAAAGAAAAAAGAAGAAGTCCCCGAGTTCACCAAAATTCAGACATT	5447	Hs.354056	GO:0010181|GO:0050661|GO:0003958|GO:0003958|GO:0019899|GO:0050660|GO:0005506|GO:0016491|GO:0090346|GO:0071375|GO:0046210|GO:0055114|GO:0055114|GO:0032770|GO:0090181|GO:0005783|GO:0005789|GO:0016020|GO:0005792|GO:0005739|GO:0005625	NP_000932	P450 (cytochrome) oxidoreductase
ASHG19A3A037298	126.188	111.584	6.89994	6.88117	coding	NM_004629	FANCG	RefSeq_coding	2649	chr9	-	35073834	35080013		ATCTGCTGTTACTTCTGAAAACTTGGAGTCCCCCAGCTGAGGAATTAGATGCTCCATTGA	2189	Hs.591084	GO:0003684|GO:0005515|GO:0006281|GO:0000075|GO:0007005|GO:0001541|GO:0009314|GO:0007286|GO:0005737|GO:0005739|GO:0005654|GO:0005634	NP_004620	Fanconi anemia, complementation group G
ASHG19A3A008997	29201.2	29331.5	14.7747	14.8938	coding	NM_015528	RNF167	RefSeq_coding	1723	chr17	+	4843629	4848515		GGCAAGCAGAGGGACTGGGTCTTCACTTCTTGGGCTAATAAAATTGTTTCTTTGTGGACT	26001	Hs.7158	GO:0016874|GO:0046872|GO:0005515|GO:0004842|GO:0008270|GO:0045786|GO:0000209|GO:0005737|GO:0012505|GO:0016021|GO:0016020	NP_056343	Ring finger protein 167
ASHG19A3A047045	108.268	143.941	6.68622	7.25019	coding	NM_174926	TMEM136	RefSeq_coding	922	chr11	+	120196015	120201346		TGTTTTTCTGGTTTTGGTCTTTTCATCACAGGATGGCATTAGCTCTGTGTCTGCAGGTGC	219902	Hs.643516	GO:0016021|GO:0016020	NP_777586	Transmembrane protein 136
ASHG19A3A053012	1650.85	1832.11	10.6009	10.9327	coding	NM_015322	FEM1B	RefSeq_coding	2583	chr15	+	68570140	68583639		GAAGAGTTTGTTGGATTTCATTAAGTGACTGGATATGTAAAGTCGTTTAATGTGGTGCTA	10116	Hs.362733	GO:0005123|GO:0005123|GO:0005515|GO:0004842|GO:0060442|GO:0060743|GO:0006917|GO:0016567|GO:2000001|GO:0042981|GO:0051438|GO:0005575|GO:0005737|GO:0005634	NP_056137	Fem-1 homolog b (C. elegans)
ASHG19A3A017570	974.55	790.039	9.83923	9.71524	coding	NM_007238	PXMP4	RefSeq_coding	5727	chr20	-	32290550	32308136		CTGGCGGCCTTCCTCGGGGGTATCCTGGTGTTTGGAGAAAACAATAACATCAACAGCCAG	11264	Hs.654857	GO:0016021|GO:0016020|GO:0005624|GO:0005778|GO:0005777	NP_899634	Peroxisomal membrane protein 4, 24kDa
ASHG19A3A025653	1552.31	1437.55	10.5136	10.5761	coding	NM_001037442	RUFY3	RefSeq_coding	4435	chr4	+	71587695	71674335		GTTACTTGGTGAAGCTGAAGTTTAAGAGTTCTGGGGAAAAATAAAATCTAGTAATTCCAG	22902	Hs.7972	GO:0030154|GO:0007275|GO:0050771|GO:0007399|GO:0030175|GO:0030426	NP_055776	RUN and FYVE domain containing 3
ASHG19A3A020491	59.6042	70.5982	5.8129	6.22004	coding	NM_005297	MCHR1	RefSeq_coding	2423	chr22	+	41075181	41078817		TTAATGTGCATCTGCCTCCGAATGTTAATGTGTCTAGGTGATGTCAGTGGGAGCCATGAA	2847	Hs.248122	GO:0004930|GO:0042562|GO:0030273|GO:0008188|GO:0008022|GO:0004872|GO:0007186|GO:0007204|GO:0007631|GO:0006091|GO:0007193|GO:0007218|GO:0051928|GO:0005887|GO:0031513|GO:0005886|GO:0005886	NP_005288	Melanin-concentrating hormone receptor 1
ASHG19A3A029921	3373.16	2474.28	11.6423	11.36	coding	NM_001097616	GPR89C	RefSeq_coding	1569	chr1	+	145883867	145924048	NM_016334,NM_001097613,NM_001097612,	AACCATCAGGTTTCTGGGGAATGATAAAAAGTGTTACCACTTCAGCATCAGGAAGTGAAA	653519	Hs.559115	GO:0004871|GO:0008308|GO:0051452|GO:0006811|GO:0043123|GO:0015031|GO:0044070|GO:0007165|GO:0005794|GO:0032580|GO:0030660|GO:0016021|GO:0016020	NP_001091082	G protein-coupled receptor 89A
ASHG19A3A002658	1377.06	1188.87	10.3385	10.3036	coding	NM_001143966	TBC1D7	RefSeq_coding	1064	chr6	-	13305185	13328770		ATCATTAGAAATTCTCCTAAAAGATGACCGTCTGGGAATCTTGCCTCCACACCACGAGTC	51256	Hs.484678	GO:0005096|GO:0005097|GO:0005515|GO:0031398|GO:0032313|GO:0016023|GO:0031410|GO:0005622	NP_057579	TBC1 domain family, member 7
ASHG19A3A030658	455.068	637.367	8.73665	9.40602	coding	NM_005670	EPM2A	RefSeq_coding	3474	chr6	-	145946445	146056991		TCTTATTTAGAAGGCGTGGGGGACAAGAAGGATACAAGGTAAGTTTCAGTGGAGCTCAGA	7957	Hs.486696	GO:0030246|GO:0016787|GO:0042802|GO:0005515|GO:0004722|GO:0004722|GO:0004725|GO:0004725|GO:0008138|GO:0007610|GO:0005975|GO:0005977|GO:0007399|GO:0006470|GO:0005737|GO:0005829|GO:0005783|GO:0005634|GO:0005886|GO:0005844	NP_005661	Epilepsy, progressive myoclonus type 2A, Lafora disease (laforin)
ASHG19A3A043425	301.701	177.816	8.1512	7.56066	coding	NM_000760	CSF3R	RefSeq_coding	3003	chr1	-	36931643	36948509	NM_172313,NM_156039,NM_156038,	GGCCTTTTGTGCTTGTTTCCTATAACTTCAGTATTGTAAACTAGTTTTTGGTTTGCAGTT	1441	Hs.524517	GO:0004896|GO:0004872|GO:0007155|GO:0006952|GO:0007165|GO:0005576|GO:0005887|GO:0005886	NP_758519	Colony stimulating factor 3 receptor (granulocyte)
ASHG19A3A019827	2305.84	1642.63	11.0816	10.7701	coding	NM_194326	RPS19BP1	RefSeq_coding	952	chr22	-	39925098	39928860		GTAAACCTGAAGTTTCTGACCAGGACGAGAAGCACCGTGGCTGAGTCTGTGAGCCAGCAG	91582	Hs.526933	GO:0005730|GO:0005654|GO:0005634	NP_919307	Ribosomal protein S19 binding protein 1
ASHG19A3A054632	415.004	337.287	8.60102	8.48607	coding	NM_001174069	LMX1A	RefSeq_coding	3366	chr1	-	165171104	165325478		CCAGAAGCGGGCGGGACGCCCTCCGGGTCCCTTACAGTGCCCCTTCTCGACCTGGGGCAG	4009	Hs.667312	GO:0046872|GO:0043565|GO:0003700|GO:0030528|GO:0008270|GO:0007411|GO:0021953|GO:0021549|GO:0021542|GO:0007275|GO:0045665|GO:0001558|GO:0006355|GO:0005634	NP_796372	LIM homeobox transcription factor 1, alpha
ASHG19A3A020859	343.689	184.106	8.33315	7.60841	coding	NM_000404	GLB1	RefSeq_coding	2588	chr3	-	33038099	33138694	NM_001079811,	TGATGTGGTTCTGTTTACCACTGATGGAGCACATAAAACATTCCTGAAATGTGGGGCCCT	2720	Hs.443031	GO:0004565|GO:0043169|GO:0004553|GO:0005515|GO:0005975|GO:0005737|GO:0005764|GO:0048471	NP_001129074	Galactosidase, beta 1
ASHG19A3A004070	1447.4	913.313	10.4122	9.91798	coding	NM_002766	PRPSAP1	RefSeq_coding	2359	chr17	-	74306867	74350230		TGTAGCTAAGTCTCCTGATGCTGCAAAGAGGGCCCAGTCCTATGCGGAGAGACTGCGTCT	5635	Hs.77498	GO:0004857|GO:0042802|GO:0000287|GO:0005515|GO:0004749|GO:0006139|GO:0009165|GO:0043234	NP_002757	Phosphoribosyl pyrophosphate synthetase-associated protein 1
ASHG19A3A044354	124134	117212	16.9391	16.8218	coding	NM_002629	PGAM1	RefSeq_coding	1762	chr10	+	99186026	99193197		CATGGGTCCAGTGTTCATCTGAGCATAACTGTACTAAATCCTTTTTCCATATCAGTATAA	5223	Hs.632918	GO:0004083|GO:0004082|GO:0016787|GO:0016853|GO:0004619|GO:0004619|GO:0019901|GO:0005975|GO:0006094|GO:0006006|GO:0006096|GO:0006110|GO:0043456|GO:0045730|GO:0005829|GO:0005829	NP_002620	Phosphoglycerate mutase 1 (brain)
ASHG19A3A019461	660.941	596.609	9.27628	9.31387	coding	NM_005984	SLC25A1	RefSeq_coding	1620	chr22	-	19163094	19166301		GGGCCTGTACCGCGGCCTTAGCTCCCTGCTCTACGGTTCCATCCCCAAGGCGGCCGTCAG	6576	Hs.725671	GO:0015137|GO:0005515|GO:0015142|GO:0005975|GO:0044255|GO:0006094|GO:0006006|GO:0035338|GO:0006843|GO:0035674|GO:0019432|GO:0016021|GO:0016020|GO:0005743|GO:0005739	NP_005975	Solute carrier family 25 (mitochondrial carrier; citrate transporter), member 1
CUST_1_PI418767722	117640	119629	16.8659	16.8471	coding	NM_002107	H3F3A	RefSeq_coding	1117	chr1	+	226250420	226259702	NR_002315,	CATGCAAGTACATGTTTTTAATGTTGTCTGTCTTCTGTGCTGTTCCTGTAAGTTTGCTAT	3020	Hs.533624		NP_002098	H3 histone, family 3A
ASHG19A3A051404	5154.3	6950	12.2546	12.8393	coding	NM_002408	MGAT2	RefSeq_coding	2728	chr14	+	50087488	50090198		TCCTGTACTATTGTGTTTTGAGTGTGTTTTGGAACCTTCATAGAACACACTTTCTTTTGG	4247	Hs.93338	GO:0008455|GO:0005529|GO:0016757|GO:0044267|GO:0009312|GO:0009311|GO:0043687|GO:0006487|GO:0018279|GO:0005794|GO:0000139|GO:0005795|GO:0016021|GO:0016020|GO:0005624	NP_002399	Mannosyl (alpha-1,6-)-glycoprotein beta-1,2-N-acetylglucosaminyltransferase
ASHG19A3A001496	2013.06	2319.34	10.8855	11.2709	coding	NM_001077261	NCOR2	RefSeq_coding	8550	chr12	-	124808961	125020149		GCGAGCGGCTGCCATCCCCCCCATCCAGGTCACCAAAGTCCATGAGCCCCCCCGGGAGGA	9612	Hs.137510	GO:0003677|GO:0005112|GO:0042826|GO:0047485|GO:0005515|GO:0003714|GO:0003714|GO:0016564|GO:0044255|GO:0010553|GO:0000122|GO:0072365|GO:0016604|GO:0005730|GO:0005654|GO:0005634|GO:0005634|GO:0017053	NP_006303	Nuclear receptor corepressor 2
ASHG19A3A019902	3669	2997.99	11.768	11.6284	coding	NM_015140	TTLL12	RefSeq_coding	3421	chr22	-	43562628	43583137		AAGAACTATCTTTCTTGTAGCAAAGCTGCACCTGATGATGCTGCCTCTCCTCTCTGTGTT	23170	Hs.517670	GO:0004835|GO:0006464	NP_055955	Tubulin tyrosine ligase-like family, member 12
ASHG19A3A008852	4705.11	4961.84	12.1257	12.3571	coding	NM_005567	LGALS3BP	RefSeq_coding	2277	chr17	-	76967335	76976061		GGGCCTTTGGTCAAATATTCTTCTGATTACTTCCAAGCCCCCTCTGACTACAGATACTAC	3959	Hs.514535	GO:0005515|GO:0005044|GO:0007155|GO:0006968|GO:0007165|GO:0031012|GO:0005576|GO:0005615|GO:0016020|GO:0005578	NP_005558	Lectin, galactoside-binding, soluble, 3 binding protein
ASHG19A3A053230	159.857	129.82	7.23992	7.10358	coding	NM_014949	KIAA0907	RefSeq_coding	2960	chr1	-	155882835	155904188		AGGCTGCATTGAGCCAGCATCTGGCCGAGAAGCTTTTGAACCTATGTATATTTACATCAG	22889	Hs.728984		NP_055764	KIAA0907
ASHG19A3A015322	23239	27571.5	14.4259	14.8107	coding	NM_152391	PQLC3	RefSeq_coding	1812	chr2	+	11295539	11318996		GAAGGCATTGTTTTGTTAGATGCAGTAATGATGTTTACCAGAGATTATTGTTTCCTATGC	130814	Hs.274415	GO:0016021|GO:0016020	NP_689604	PQ loop repeat containing 3
ASHG19A3A006338	1181.51	1056.9	10.1251	10.1272	coding	NM_172361	CD46	RefSeq_coding	3146	chr1	+	207925401	207968857	NM_172357,	ATCCCCCAGTTCCAAAGTGTCTTAAAGGATATCCTAAACCTGAGGAAGGAATACTTGACA	4179	Hs.510402	GO:0001848|GO:0004175|GO:0004857|GO:0004872|GO:0006958|GO:0045087|GO:0044419|GO:0045916|GO:0006508|GO:0007338|GO:0005794|GO:0001669|GO:0016323|GO:0009986|GO:0005737|GO:0031410|GO:0002079|GO:0005887|GO:0005886	NP_758871	CD46 molecule, complement regulatory protein
ASHG19A3A013414	162.888	217.012	7.26506	7.84811	coding	NM_001166239	CGREF1	RefSeq_coding	1783	chr2	-	27323462	27341773		CCCGCCCCGGCCGGCCGGAGACCCGAGCCCATCGCCGTCAGCCAGCCAGGGCCGCGCGGG	10669	Hs.159525	GO:0005509|GO:0007155|GO:0007049|GO:0007050|GO:0030308|GO:0008285|GO:0006950|GO:0005576	NP_006560	Cell growth regulator with EF-hand domain 1
ASHG19A3A031139	261.42	175.293	7.94625	7.53807	coding	NM_003495	HIST1H4I	RefSeq_coding	370	chr6	+	27107087	27107457		AAATGGCATTTTGAAGCCCAGTCATTCTCTAAAAAGGCCCTTTTTAGGGCCCCTAAGCTT	8294	Hs.248172		NP_003486	Histone cluster 1, H4i
ASHG19A3A012212	4499.96	2551.55	12.0604	11.4109	coding	NM_001137673	ILF3	RefSeq_coding	3757	chr19	+	10764936	10796443		AAGCCCACCTTTGCTTTTTATGGAAAGCATTACTTTATTTAAAGAGACAGACAATGACGC	3609	Hs.465885	GO:0003677|GO:0003723|GO:0003725|GO:0005515|GO:0016563|GO:0016564|GO:0000279|GO:0045892|GO:0045893|GO:0005737|GO:0005622|GO:0005739|GO:0005730|GO:0005634|GO:0005634|GO:0030529	NP_703194	Interleukin enhancer binding factor 3, 90kDa
ASHG19A3A006563	113.875	134.702	6.75529	7.15476	coding	NM_181642	SPINT1	RefSeq_coding	2484	chr15	+	41136245	41149852		GGGGCTCAGGCGACTTTCCCCCAGGGCCCCTCCATGGAAAGGCGCCATCCAGGTGGGCTT	6692	Hs.233950	GO:0030414|GO:0005515|GO:0004867|GO:0005576|GO:0005624	NP_857593	Serine peptidase inhibitor, Kunitz type 1
ASHG19A3A047318	1557.52	911.429	10.5191	9.91488	coding	NM_003651	CSDA	RefSeq_coding	1976	chr12	-	10851677	10875953	NR_027011,	TACCACGTGGGACAGACCTTTGACCGTCGCTCACGGGTCTTACCCCATCCCAACAGAATA	8531	Hs.221889	GO:0003677|GO:0003702|GO:0003690|GO:0003730|GO:0003700|GO:0003697|GO:0003714|GO:0016564|GO:0009566|GO:0001701|GO:0008584|GO:0043066|GO:0048642|GO:0000122|GO:0031100|GO:0046622|GO:0006355|GO:0009409|GO:0007283|GO:0006351|GO:0005737|GO:0005921|GO:0005634|GO:0005844	NP_003642	Cold shock domain protein A
ASHG19A3A054772	7145.58	5922.91	12.7262	12.6146	coding	NM_001017967	MARVELD3	RefSeq_coding	2239	chr16	+	71660069	71675866		ATAGTAATCTCATTACCCTGGACTGTTCTCATAATGTAACAGATCACTAACACTGAATCT	91862	Hs.513706	GO:0016021|GO:0016020	NP_443090	MARVEL domain containing 3
ASHG19A3A002413	277.189	281.333	8.03078	8.22365	coding	NM_001136196	TNPO2	RefSeq_coding	4949	chr19	-	12810008	12833462		CCCAAGACACTGCTGGAAAACACAGGTCGCCTGACGAGTCCCTCTGCCATTCCAGCCATC	30000	Hs.416049	GO:0008139|GO:0005515|GO:0008565|GO:0006886|GO:0005737|GO:0005634	NP_038461	Transportin 2
ASHG19A3A046081	242.39	240.136	7.83638	7.98905	coding	NM_001005181	OR56B4	RefSeq_coding	960	chr11	+	6129008	6129966		CAGAGAAAAAGATTCCCCTTATTCCTGTGTTCCTTAATGTGCTGCACAATGTCATCCCCC	196335	Hs.632154	GO:0004984|GO:0004872|GO:0050896|GO:0007608|GO:0016021|GO:0005886	NP_001005181	Olfactory receptor, family 56, subfamily B, member 4
ASHG19A3A012069	2167.83	1115.26	10.9881	10.2104	coding	NM_001159846	MPND	RefSeq_coding	1523	chr19	+	4343523	4360082		GATGTGGAGATGGCCTACGTCCAGGACAGCTTCCTGACCAATGACATCCTTCACGAGATG	84954	Hs.321689	GO:0008233	NP_116257	MPN domain containing
ASHG19A3A052530	3571.45	2335.53	11.7264	11.2795	coding	NM_001126131	POLG	RefSeq_coding	4452	chr15	-	89859536	89878026		TTTTCAGTGCAGTCGATATTGACCGGTGCCTCAGGAAGGAAGTGACCATGGATTGTAAAA	5428	Hs.706868	GO:0003677|GO:0003887|GO:0004527|GO:0016779|GO:0002020|GO:0005515|GO:0016740|GO:0006259|GO:0006261|GO:0007568|GO:0006287|GO:0006264|GO:0005760|GO:0005743|GO:0042645|GO:0005739	NP_002684	Polymerase (DNA directed), gamma
ASHG19A3A008575	225.187	158.472	7.72979	7.39276	coding	NM_052855	ANKRD40	RefSeq_coding	4169	chr17	-	48770551	48785270		GACCAGCGCCAGCATTCCAGCCATTTTTCTTCACTGGAGCATTTCCATTTAATATGCAAG	91369	Hs.463426		NP_443087	Ankyrin repeat domain 40
ASHG19A3A052447	119.191	106.428	6.81873	6.81195	coding	NM_153815	RASGRF1	RefSeq_coding	4860	chr15	-	79252290	79298002		ATGAGACAAGCTATGGTTTGCAATGTTCTGGATGTATAACCTGTTTCCAGCCTGGCCTGA	5923	Hs.459035	GO:0005088|GO:0005089|GO:0005085|GO:0032863|GO:0006915|GO:0008624|GO:0007616|GO:0048011|GO:0031175|GO:0032320|GO:0035020|GO:0046578|GO:0035023|GO:0051056|GO:0007165|GO:0007264|GO:0007268|GO:0005829|GO:0005829|GO:0005829|GO:0030426|GO:0005622|GO:0005886|GO:0005886|GO:0019717	NP_722522	Ras protein-specific guanine nucleotide-releasing factor 1
ASHG19A3A029718	253.488	235.086	7.9041	7.95892	coding	NM_000434	NEU1	RefSeq_coding	2088	chr6	-	31826829	31830709		AGTGAGCGATGTTGAGACAGGAGTAGTATTTCTTTTCTACTCCCTTTGTGCTCACAAGGC	4758	Hs.520037	GO:0004308|GO:0016798|GO:0005515|GO:0008152|GO:0016023|GO:0043202|GO:0005765|GO:0005764|GO:0005886	NP_000425	Sialidase 1 (lysosomal sialidase)
ASHG19A3A048707	212.432	238.749	7.64955	7.98119	coding	NM_001345	DGKA	RefSeq_coding	2756	chr12	+	56324945	56347805		TGAAAGGACCTTTCACTCCCTACTTTTGGCCAGGGCCTTCTGTGCCACCTGCCAAGACCA	1606	Hs.524488	GO:0005524|GO:0005509|GO:0004143|GO:0000166|GO:0005543|GO:0016740|GO:0007205|GO:0007596|GO:0035556|GO:0030168|GO:0005829|GO:0005886	NP_963848	Diacylglycerol kinase, alpha 80kDa
ASHG19A3A050571	1163.34	516.823	10.1008	9.10917	coding	NM_007192	SUPT16H	RefSeq_coding	4684	chr14	-	21819630	21852425		TCTGGGCAGGAATGAAGGCAACATCTTTCCTAACCCTGAAGCGACTTTTGTCAAGGAAAT	11198	Hs.213724	GO:0005525|GO:0008159|GO:0006281|GO:0006260|GO:0009987|GO:0010467|GO:0006337|GO:0050434|GO:0006368|GO:0006366|GO:0016032|GO:0005694|GO:0005654|GO:0005654|GO:0005634	NP_009123	Suppressor of Ty 16 homolog (S. cerevisiae)
ASHG19A3A003107	222.903	206.979	7.71596	7.77993	coding	NM_001161530	CSF2RA	RefSeq_coding	1789	chrY	+	1351570	1378828		tcaagcgattctcctgcctcagactcccagGTTCTGACGACGGGAACCTCGGCTCTGTGT	1438	Hs.520937	GO:0004896|GO:0005515|GO:0004872|GO:0005576|GO:0005887|GO:0005886|GO:0005886	NP_758452	Colony stimulating factor 2 receptor, alpha, low-affinity (granulocyte-macrophage)
ASHG19A3A028224	349.813	177.535	8.3588	7.5584	coding	NM_015360	SKIV2L2	RefSeq_coding	4222	chr5	+	54603575	54721408		TTGCAACACTACATTTTTCCAGCAGGGGGAGATGGCCTGCATCTTGTGGTTGATGAAAAT	23517	Hs.274531	GO:0005524|GO:0008026|GO:0004386|GO:0016818|GO:0003676|GO:0000166|GO:0005515|GO:0008380|GO:0000398|GO:0071013|GO:0005730|GO:0005634	NP_056175	Superkiller viralicidic activity 2-like 2 (S. cerevisiae)
ASHG19A3A030650	52981.2	53052.1	15.6734	15.7095	coding	NM_031287	SF3B5	RefSeq_coding	786	chr6	-	144416017	144416754		CGTCTCGTTTTTGGCTAATTGATTGTCATTGGCTTTTTCCATAAAGTTTAGAAATCGTTC	83443	Hs.110695	GO:0008380|GO:0010467|GO:0000398|GO:0005689|GO:0005654|GO:0005634	NP_112577	Splicing factor 3b, subunit 5, 10kDa
ASHG19A3A000772	668.563	765.53	9.29228	9.67079	coding	NM_001004057	GRK4	RefSeq_coding	2183	chr4	+	2965342	3042474		TGTCTCCATCCCCTGGCAGAATGAGGGCTGCCTGACCATGGTCCCCAGTGAGAAGGAAGT	2868	Hs.32959	GO:0005524|GO:0004703|GO:0000166|GO:0004871|GO:0016740|GO:0006468|GO:0008277|GO:0005938|GO:0005737	NP_892027	G protein-coupled receptor kinase 4
ASHG19A3A036359	199.206	252.315	7.55163	8.06338	coding	NM_001033017	DEFB135	RefSeq_coding	234	chr8	+	11839829	11842099		CCACAAGGAGCGTCCTCTTGGCCCTCGTGGTCCTTAACTTACTCTTCTATGTTCCACCAG	613209	Hs.558284	GO:0042742|GO:0005576	NP_001028189	Defensin, beta 135
ASHG19A3A004928	112.428	144.502	6.73945	7.25675	coding	NM_016828	OGG1	RefSeq_coding	2258	chr3	+	9791627	9808352		ACCTTATGCTGGCTGGGCCCAAGCGCTCTGTCAGGTCATCACCACTTTTATGACCTTTCT	4968	Hs.380271	GO:0003684|GO:0004519|GO:0016798|GO:0016829|GO:0008534|GO:0005515|GO:0006281|GO:0006284|GO:0006285|GO:0045007|GO:0045007|GO:0006289|GO:0033158|GO:0006979|GO:0009314|GO:0005737|GO:0005739|GO:0016363|GO:0016607|GO:0005730|GO:0005654|GO:0005654|GO:0005654|GO:0005634	NP_058438	8-oxoguanine DNA glycosylase
ASHG19A3A041335	2258.47	1154.51	11.0471	10.2625	coding	NM_001080425	BEX4	RefSeq_coding	1290	chrX	+	102470019	102472120		GTCGCGGCGGCGCACCTCGCGTCAAGAATCCGGAGGAGGAGACTGCAAGGATAGGCCCAG	56271	Hs.184736	GO:0005737|GO:0005634	NP_001121160	Brain expressed, X-linked 4
ASHG19A3A020642	1958.07	2319.82	10.8437	11.2718	coding	NM_181809	BMP8A	RefSeq_coding	5642	chr1	+	39957317	39995537		TCCTTACTGAAAAGTCTTGAGCAAACAGTTGCCGCTCTCCACCCCCTGCTTTTTAAAAAA	353500	Hs.472497	GO:0005125|GO:0008083|GO:0051216|GO:0030154|GO:0040007|GO:0007275|GO:0001503|GO:0005576|GO:0005615	NP_861525	Bone morphogenetic protein 8a
ASHG19A3A009101	185.75	205.377	7.45438	7.76801	coding	NM_153007	ODF4	RefSeq_coding	1149	chr17	+	8243187	8249363		TATCCATCCCCATAGGCTGGAGCTATTTCATTGGTTGGCTGGTGCTTATCCTATACTTCA	146852	Hs.186045	GO:0030154|GO:0007275|GO:0007283|GO:0016021|GO:0016020|GO:0009434|GO:0001520	NP_694552	Outer dense fiber of sperm tails 4
ASHG19A3A004939	389.063	299.473	8.5137	8.31624	coding	NM_017452	STAU1	RefSeq_coding	3399	chr20	-	47729877	47804904	NM_001037328,	TCCTGGAACGCCCTCTTTTTAAAAAAGAAAGCATAACCCCTACTGTAGAACTAAATGCAC	6780	Hs.596704	GO:0003725|GO:0005515|GO:0008157|GO:0008298|GO:0005737|GO:0005622|GO:0005875|GO:0043005|GO:0043025|GO:0005791|GO:0010494	NP_059348	Staufen, RNA binding protein, homolog 1 (Drosophila)
ASHG19A3A050105	76.6307	107.05	6.18019	6.82098	coding	NM_182508	C13orf30	RefSeq_coding	3318	chr13	+	43355685	43365683		GGCCTCTGGCTTTGTGATATTATTCTAGAGTCCCAGTAACCCACAATTGTTGATGAGGAG	144809	Hs.16970		NP_872314	Chromosome 13 open reading frame 30
ASHG19A3A003876	33955.4	26577.5	15.0014	14.7573	coding	NM_001207	BTF3	RefSeq_coding	1021	chr5	+	72794249	72801448		CGCGGCCCCTTATTCGCTCCGACAAGATGAAAGAAACAATCATGAACCAGGAAAAACTCG	689	Hs.591768	GO:0003702|GO:0005515|GO:0006366|GO:0005634	NP_001198	Basic transcription factor 3
ASHG19A3A050657	419.434	565.7	8.61569	9.23631	coding	NM_138452	DHRS1	RefSeq_coding	1488	chr14	-	24759805	24768666		AGGGTTGTAGTAGTTGTCCACCTCTGGACAGTCCCACTCAGCCCCTTCTTCACTCTCTGG	115817	Hs.348350	GO:0005488|GO:0016491|GO:0055114|GO:0005783|GO:0005743|GO:0005739	NP_612461	Dehydrogenase/reductase (SDR family) member 1
ASHG19A3A003883	719.886	537.79	9.40194	9.1672	coding	NM_001241	CCNT2	RefSeq_coding	4513	chr2	+	135676392	135714584		ATGAGCAAAAGTTCCAAAAGTTCAGGTGGGCTACGGACATCTCAGCACCCTCGTGAAACT	905	Hs.658324	GO:0007049|GO:0051301|GO:0010467|GO:0044419|GO:0000079|GO:0006368|GO:0006366|GO:0016032|GO:0005654|GO:0005654|GO:0005634	NP_490595	Cyclin T2
ASHG19A3A016572	177.493	165.972	7.38748	7.45796	coding	NM_172070	UBR3	RefSeq_coding	7969	chr2	+	170684017	170940637		TTGAATTGATTCATCGAGGAGGCAATTTGTGTTCAGGTGGTGCAAGCACAGCTGGCAAAA	130507	Hs.379548	GO:0016874|GO:0046872|GO:0004842|GO:0008270|GO:0009790|GO:0001701|GO:0042048|GO:0016567|GO:0007608|GO:0001967|GO:0006511|GO:0016021|GO:0016020	NP_742067	Ubiquitin protein ligase E3 component n-recognin 3 (putative)
ASHG19A3A019476	168.589	150.638	7.31172	7.31992	coding	NM_006440	TXNRD2	RefSeq_coding	1964	chr22	-	19863039	19929359		AAAGTCAAGTACTTTAACATCAAAGCCAGCTTTGTTGACGAGCACACGGTTTGCGGCGTT	10587	Hs.443430	GO:0050661|GO:0050660|GO:0016491|GO:0005515|GO:0004791|GO:0045454|GO:0055114|GO:0000305|GO:0005737|GO:0005739	NP_006431	Thioredoxin reductase 2
ASHG19A3A026917	5209.13	5594.65	12.2662	12.5361	coding	NM_001515	GTF2H2	RefSeq_coding	1951	chr5	-	70330952	70363497	NR_033417,NM_001098729,NM_001098728,NM_001042490,	TCTGTTATTGGATTGTCTGCAGAAGTTCGCGTTTGCACTGTACTTGCTCGTGAAACTGGT	2966	Hs.607501	GO:0008094|GO:0008353|GO:0046872|GO:0003676|GO:0047485|GO:0005515|GO:0004672|GO:0003700|GO:0008135|GO:0008270|GO:0006281|GO:0002031|GO:0010467|GO:0006370|GO:0006289|GO:0000718|GO:0050434|GO:0009411|GO:0006363|GO:0006362|GO:0006368|GO:0006368|GO:0006360|GO:0006366|GO:0006366|GO:0006361|GO:0006367|GO:0006367|GO:0006351|GO:0006283|GO:0006412|GO:0016032|GO:0005675|GO:0005622|GO:0005654|GO:0005654|GO:…	NP_001506	General transcription factor IIH, polypeptide 2, 44kDa
ASHG19A3A015468	1009.55	762.901	9.89556	9.66556	coding	NM_199280	FAM179A	RefSeq_coding	3564	chr2	+	29204163	29275094		ATTTCTGAAGCAATCTCTCCCATCTTACGACTTGCAGAAGGTCATGGCGGCCATTAAACA	165186	Hs.525977	GO:0005488	NP_954974	Family with sequence similarity 179, member A
ASHG19A3A037937	628.444	800.717	9.19892	9.73374	coding	NM_017443	POLE3	RefSeq_coding	2288	chr9	-	116169517	116173029		GCCCCGCCGAGTCAGCCACGCCTTCGTCTCCCACGCGCTGCGCCCGGCCGCGCCGTCACC	54107	Hs.108112	GO:0003887|GO:0016779|GO:0005515|GO:0043565|GO:0016740|GO:0006260|GO:0043966|GO:0005671|GO:0005622|GO:0005634	NP_059139	Polymerase (DNA directed), epsilon 3 (p17 subunit)
ASHG19A3A023010	178.581	181.987	7.39568	7.59143	coding	NM_017699	SIDT1	RefSeq_coding	5021	chr3	+	113251217	113348421		TGTTTGGAAAAAATGACGTATGGTTCTGGGTCATCTTCTCTGCAATCCACGTTCTGGCCT	54847	Hs.591291	GO:0016021|GO:0016020	NP_060169	SID1 transmembrane family, member 1
ASHG19A3A013140	647.035	451.493	9.24438	8.91562	coding	NM_003435	ZNF134	RefSeq_coding	2248	chr19	+	58125829	58133636		ATTTTAGAGTTATTTGAGAGCCCATATTTCACCTTGAGGAGGGTGCTGCTGCTGTGACAG	7693	Hs.469694	GO:0003677|GO:0046872|GO:0003700|GO:0008270|GO:0006355|GO:0006351|GO:0005622|GO:0005730|GO:0005634|GO:0005634	NP_003426	Zinc finger protein 134
ASHG19A3A031291	6584.64	7924.88	12.6032	13.0264	coding	NM_000595	LTA	RefSeq_coding	1386	chr6	+	31540092	31542098		GGCCTCGGTCCCTCCTGCACCTGCTGCCTGGATCCCCGGCCTGCCTGGGCCTGGGCCTTG	4049	Hs.36	GO:0005125|GO:0005515|GO:0005102|GO:0005164|GO:0007267|GO:0050830|GO:0006959|GO:0006917|GO:0048535|GO:0048147|GO:0044130|GO:0002876|GO:0002925|GO:0032729|GO:0042493|GO:0001666|GO:0032496|GO:0007584|GO:0007165|GO:0005576|GO:0005615|GO:0016020	NP_001153212	Lymphotoxin alpha (TNF superfamily, member 1)
ASHG19A3A027425	867.295	524.831	9.66974	9.13067	coding	NM_138609	H2AFY	RefSeq_coding	1931	chr5	-	134670070	134734928		ACAGGCTGACATTGCCTCGATCGACAGTGATGCTGTCGTTCACCCGACAAACACTGACTT	9555	Hs.420272	GO:0003677|GO:0016568|GO:0007549|GO:0006334|GO:0001740|GO:0005694|GO:0000786|GO:0005634	NP_613258	H2A histone family, member Y
ASHG19A3A012726	145.788	171.126	7.10412	7.50272	coding	NM_199002	ARHGEF1	RefSeq_coding	3261	chr19	+	42388445	42411600		CCCGAGCGCGGAGGCTTCGGTTCCGGTGGCGGCGATGGCTTCTCTTTCCACCTGGAGCAG	9138	Hs.631550	GO:0005096|GO:0005089|GO:0005085|GO:0005515|GO:0007266|GO:0008283|GO:0050771|GO:0048011|GO:0050772|GO:0035023|GO:0050770|GO:0005737|GO:0005829|GO:0005622|GO:0005886|GO:0005886	NP_945353	Rho guanine nucleotide exchange factor (GEF) 1
ASHG19A3A046538	410.847	291.298	8.5876	8.27165	coding	NM_031471	FERMT3	RefSeq_coding	2558	chr11	+	63974151	63991363		AAGACCAGATGTAGCTACAGGATGATGAAACATGGTTTCAAACGAGTTCTTTCTTGTTAC	83706	Hs.180535	GO:0005178|GO:0005515|GO:0007155|GO:0033622|GO:0007159|GO:0070527|GO:0033632|GO:0030054|GO:0042995|GO:0002102	NP_848537	Fermitin family member 3
ASHG19A3A031005	37764	35273.5	15.161	15.1488	coding	NM_016167	NOL7	RefSeq_coding	896	chr6	+	13615558	13621126		TTGCCAACAAGAGGTTACCAGTGAAAAGAGCTGCTGTCCAGTTTTTGAATAATGCTTGGG	51406	Hs.306242	GO:0005739|GO:0005730|GO:0005634	NP_057251	Nucleolar protein 7, 27kDa
ASHG19A3A001464	99.1055	79.2558	6.56109	6.38571	coding	NM_001045557	SLA	RefSeq_coding	3228	chr8	-	134048973	134115310		CTCAGGCAGCCCTGATGCTCCACCGGCTCTGGGCATCACCAGCGGCCCCAGGGAAAAAGA	6503	Hs.75367	GO:0005070|GO:0005737|GO:0005768	NP_006739	Src-like-adaptor
ASHG19A3A022340	1447.22	782.553	10.4115	9.70157	coding	NM_004162	RAB5A	RefSeq_coding	2548	chr3	+	19988571	20026658		GCCTAGTGCTTCGTTTTGTGAAAGGCCAATTTCATGAATTTCAAGAGAGTACCATTGGGG	5868	Hs.475663	GO:0019003|GO:0051021|GO:0005525|GO:0003924|GO:0019001|GO:0000166|GO:0005515|GO:0006184|GO:0006184|GO:0007596|GO:0006897|GO:0015031|GO:0031623|GO:0048169|GO:0007264|GO:0030424|GO:0005737|GO:0030425|GO:0005769|GO:0031901|GO:0030139|GO:0010008|GO:0042470|GO:0045121|GO:0043025|GO:0048471|GO:0005886|GO:0043234|GO:0001726|GO:0008021|GO:0042589	NP_004153	RAB5A, member RAS oncogene family
ASHG19A3A001474	1324.36	1222.99	10.283	10.3445	coding	NM_001048230	ADORA1	RefSeq_coding	2782	chr1	+	203096835	203136533		GCTCTGCCAGCTTTGGTGACCTTGGGTGCTTGCCTCGTGCCCCTTGGTGCCCGTCTGCTG	134	Hs.77867	GO:0031683|GO:0001664|GO:0001609|GO:0032795|GO:0004629|GO:0005515|GO:0046982|GO:0001883|GO:0004872|GO:0000186|GO:0007267|GO:0050890|GO:0050965|GO:0008624|GO:0006954|GO:0007193|GO:0030147|GO:0043066|GO:0055118|GO:0008285|GO:0042323|GO:0014050|GO:0045822|GO:0046888|GO:0050728|GO:0002686|GO:0050995|GO:0070256|GO:0032900|GO:0032229|GO:0051967|GO:0045908|GO:0007399|GO:0006909|GO:0045777|GO:0045741|GO:…	NP_001041695	Adenosine A1 receptor
ASHG19A3A001089	514.856	397.644	8.91074	8.72663	coding	NM_001024463	PPIP5K1	RefSeq_coding	4983	chr15	-	43825659	43882430		GCATAATGCCCTTTCCCTACGTCAAGTGCCACCTATGGAAACCAGCCAGCCATACGAGGA
ASHG19A3A050175	319.079	338.292	8.23116	8.49091	coding	NM_001040443	PHF11	RefSeq_coding	1649	chr13	+	50069800	50103116		ATTCAAATTAAGACTAGACTGGAATCTGGAGCAGTGTGTGTGACAACCCCTCTCTGCACA	51131	Hs.369039	GO:0046872|GO:0008270|GO:0005634	NP_001035534	PHD finger protein 11
ASHG19A3A024428	445.339	262.575	8.70668	8.12201	coding	NM_006665	HPSE	RefSeq_coding	1817	chr4	-	84216469	84256306	NM_001098540,	CAAGTATTCTTTGGAGCAGGAAACTACCATTTAGTGGATGAAAACTTCGATCCTTTACCT	10855	Hs.44227	GO:0004566|GO:0043169|GO:0016798|GO:0005975|GO:0006029|GO:0005576|GO:0005765|GO:0016020	NP_006656	Heparanase
ASHG19A3A013047	587.225	568.705	9.10201	9.24509	coding	NM_006737	KIR3DL2	RefSeq_coding	1877	chr19	+	55361897	55378661		TTCCGTGCCCTGCCCTGCGTGTGGTCAAACTCAAGTGACCCACTGCTTGTTTCTGTCACA	3811	Hs.645228	GO:0030109|GO:0004872|GO:0006955|GO:0050776|GO:0005887|GO:0005886	NP_037421	Killer cell immunoglobulin-like receptor, three domains, long cytoplasmic tail, 1
ASHG19A3A022989	312.479	313.247	8.20079	8.38102	coding	NM_001134437	PHLDB2	RefSeq_coding	5957	chr3	+	111451326	111695362		GAAAAGGAGAAACCTGTGTTAATGTGTCTTCCCAACATCCCACTCTCTTCAGCAATCGCT	90102	Hs.603252	GO:0005737|GO:0045111|GO:0005886	NP_665696	Pleckstrin homology-like domain, family B, member 2
ASHG19A3A011799	91.6879	86.3792	6.44444	6.50422	coding	NM_001102603	ZNF160	RefSeq_coding	4336	chr19	-	53569867	53606687		GGGGACCCAGCTCTTCTTGCAGCCACTGGAAGCTGATCACCTGGAGTGAAGACCTCACAC	90338	Hs.655967	GO:0003677|GO:0046872|GO:0008270|GO:0030097|GO:0006355|GO:0005622|GO:0005634	NP_942596	Zinc finger protein 160
ASHG19A3A033098	1595.59	4797.1	10.5546	12.3075	coding	NM_014510	PCLO	RefSeq_coding	17095	chr7	-	82449795	82792197		GTGTTGGGCATGTGAATCTCCAAGTGCCTGTGTAATAAATAAAGTATCTTTATTTCATTC	27445	Hs.12376	GO:0005509|GO:0005544|GO:0005522|GO:0005215|GO:0008270|GO:0007010|GO:0016079|GO:0030054|GO:0005856|GO:0016020|GO:0045202|GO:0008021	NP_149015	Piccolo (presynaptic cytomatrix protein)
ASHG19A3A001265	443.466	365.917	8.70049	8.61234	coding	NM_001037663	EEF1B2	RefSeq_coding	900	chr2	+	207024317	207027653		CCCGTCATCTTCGGGAGCCGTGGAGCGTGGGGCGCCCACAATTTGCGCGCTCTCTTTCTG	1933	Hs.421608	GO:0005515|GO:0003746|GO:0044267|GO:0010467|GO:0006412|GO:0006414|GO:0006414|GO:0005829|GO:0005829|GO:0005853	NP_066944	Eukaryotic translation elongation factor 1 beta 2
ASHG19A3A039096	111.706	113.816	6.7303	6.90922	coding	NM_006687	ACTL7A	RefSeq_coding	1433	chr9	+	111624602	111626035		AGAGAAATATGCTGAAATGCTGTTTGAAGCCTTCAACACCCCTGCAATGCACATCGCCTA	10881	Hs.123530	GO:0005200|GO:0005737|GO:0005856|GO:0001673|GO:0009434	NP_006678	Actin-like 7A
ASHG19A3A003923	75.3715	70.9466	6.15697	6.22705	coding	NM_001633	AMBP	RefSeq_coding	1450	chr9	-	116822409	116840752		GGAACCAGAGCCCATCTTAATCCCGAGAGTCCGGAGGGCTGTGCTACCCCAAGAAGAGGA	259	Hs.436911	GO:0019862|GO:0019855|GO:0046904|GO:0020037|GO:0030414|GO:0042803|GO:0004867|GO:0005215|GO:0007155|GO:0007565|GO:0042167|GO:0044419|GO:0046329|GO:0050777|GO:0018298|GO:0005576|GO:0005792|GO:0005886	NP_001624	Alpha-1-microglobulin/bikunin precursor
ASHG19A3A004753	279.848	188.085	8.04389	7.63726	coding	NM_014693	ECE2	RefSeq_coding	3498	chr3	+	183967444	184010818		CACTGTGGACCAGGTGTTGAGTGAGGTGGGATTCCAGAAGGGGACAAGACAGCTGTTAGG	9718	Hs.146161	GO:0046872|GO:0004222|GO:0008168|GO:0008233|GO:0016740|GO:0007420|GO:0010002|GO:0007267|GO:0007507|GO:0016486|GO:0006508|GO:0005794|GO:0000139|GO:0030659|GO:0016021|GO:0016020	NP_115707	Endothelin converting enzyme 2
ASHG19A3A049585	782.784	598.591	9.52373	9.31788	coding	NM_024102	WDR77	RefSeq_coding	2428	chr1	-	111982512	111991830		AAGTATGAGCATGATGACATTGTGTCTACAGTCAGTGTCTTGAGCTCTGGCACACAAGCT	79084	Hs.204773	GO:0030374|GO:0005515|GO:0016070|GO:0034660|GO:0008285|GO:0060770|GO:0008284|GO:0006357|GO:0060528|GO:0000387|GO:0005737|GO:0005737|GO:0005829|GO:0005634	NP_077007	WD repeat domain 77
ASHG19A3A002118	110.596	107.484	6.71501	6.82722	coding	NM_001129826	CSAG3	RefSeq_coding	770	chrX	+	151927810	151928737	NM_001080848,	TCTCAACCCTGGCCCAGAAGCCCTATCAAAGTTCCCAAGACAACCCGGAAGGGAAAAGGG	728461	Hs.729845	GO:0042493	NP_004900	CSAG family, member 2
ASHG19A3A047841	2596.1	3031.03	11.2526	11.6431	coding	NM_001143885	PPP1R12A	RefSeq_coding	5582	chr12	-	80167343	80329235		GATTCCCGGGAGCCCCCAGCCCGACAGGACAACCTTCCTTCCCCGCTTCCTCCTTTCCAG	4659	Hs.49582	GO:0004721|GO:0005515|GO:0004871|GO:0006470|GO:0046822|GO:0007165|GO:0005737	NP_002471	Protein phosphatase 1, regulatory (inhibitor) subunit 12A
ASHG19A3A030332	4322.05	4811.93	12.0041	12.3111	coding	NM_004849	ATG5	RefSeq_coding	3244	chr6	-	106632353	106773695		AGTTGCACACACTAGGAGATCTCCTCAAAGAAGTTTGTCCTTCTGCTATTGATCCTGAAG	9474	Hs.486063	GO:0005515|GO:0000045|GO:0006914|GO:0001974|GO:0060047|GO:0043066|GO:0031397|GO:0032480|GO:0043687|GO:0042493|GO:0042311|GO:0055015|GO:0005776|GO:0005737|GO:0034045	NP_004840	ATG5 autophagy related 5 homolog (S. cerevisiae)
ASHG19A3A044238	101.217	102.396	6.5907	6.75391	coding	NM_001168247	SLFNL1	RefSeq_coding	2133	chr1	-	41481268	41487397		TGACCTGAATGCCCCCAGGCCAACTGCCTCAAGGATTCCATTTGAGAAGATGCAGGCTGG	200172	Hs.194609	GO:0005524|GO:0000166	NP_659427	Schlafen-like 1
ASHG19A3A002793	1676.32	1322.26	10.6267	10.4563	coding	NM_001145289	AKR7L	RefSeq_coding	2135	chr1	-	19592475	19600568		CTGGATCCTGCCCACTGTGTACCAGCTTCTGGAAGGAGCACCACTTCGAGGGCATTGCCC	246181	Hs.662342	GO:0016491|GO:0055114	NP_957704	Aldo-keto reductase family 7-like
ASHG19A3A006648	340.175	272.49	8.31981	8.17626	coding	NM_182835	SCFD1	RefSeq_coding	2101	chr14	+	31091520	31205018		GCCAGTATTCGGGAAAGGCAGACAGGTACTCATTTATGACAGATTTGGCCAAGATATAAT	23256	Hs.369168	GO:0051535|GO:0006892|GO:0015031|GO:0060628|GO:0009636|GO:0006890|GO:0006904|GO:0016192|GO:0005794|GO:0032580|GO:0017119|GO:0005798|GO:0005801|GO:0005737|GO:0005783|GO:0005789|GO:0005886	NP_878255	Sec1 family domain containing 1
ASHG19A3A051428	130.815	75.1582	6.95174	6.31048	coding	NM_000956	PTGER2	RefSeq_coding	2494	chr14	+	52781015	52795320		GAACATGGTTTGACTCATCTTATATGGGAAACCATGTAGCAGTGAGTCATATCTTAATAT	5732	Hs.2090	GO:0004930|GO:0004957|GO:0004872|GO:0007186|GO:0042127|GO:0005887|GO:0005886|GO:0005886	NP_000947	Prostaglandin E receptor 2 (subtype EP2), 53kDa
ASHG19A3A036318	687.958	849.494	9.33582	9.81881	coding	NM_004942	DEFB4A	RefSeq_coding	336	chr8	+	7752198	7754236		TCCCTCATCAGAGACGTGCGACATGTAAACCAAATTAAACTATGGTGTCCAAAGATACGC	1673	Hs.105924	GO:0007186|GO:0006935|GO:0042742|GO:0006955|GO:0005576	NP_004933	Defensin, beta 4A
ASHG19A3A024973	68.4271	68.5547	6.01865	6.17894	coding	NM_021647	MFAP3L	RefSeq_coding	6204	chr4	-	170907749	170947429		AGTTCAAGTGGTATAATTCCATTGGCAAGCTGCTGAAAGAAGAAGAGGATGAGAAGGAGA	9848	Hs.593942	GO:0016021|GO:0005886	NP_067679	Microfibrillar-associated protein 3-like
ASHG19A3A052371	425.47	401.897	8.64118	8.74298	coding	NM_005979	S100A13	RefSeq_coding	743	chr1	-	153591279	153600715		TGGATGTCTTACCCCAAGCTGGGCCTTGCAGTACCTGTGGCTGGCTGTGCTGGTTGAGCC	6284	Hs.516505	GO:0050786|GO:0005509|GO:0005507|GO:0048602|GO:0008289|GO:0005515|GO:0042803|GO:0008270|GO:0050663|GO:0050703|GO:0043303|GO:0043123|GO:0015031|GO:0005737|GO:0005829|GO:0005576|GO:0005615|GO:0005634|GO:0048471	NP_005970	S100 calcium binding protein A13
ASHG19A3A033186	224.606	232.264	7.72621	7.94334	coding	NM_001160210	SLC25A13	RefSeq_coding	3207	chr7	-	95749532	95951459		CTTTGTTTATGGTAGCCTTTCAGCTGTTTGACAAAGCTGGCAAAGGAGAAGTAACTTTTG	10165	Hs.489190	GO:0015183|GO:0005313|GO:0015172|GO:0005488|GO:0005509|GO:0005215|GO:0006754|GO:0015813|GO:0015800|GO:0015810|GO:0005975|GO:0045333|GO:0006094|GO:0006006|GO:0043490|GO:0051592|GO:0055085|GO:0006810|GO:0005887|GO:0016020|GO:0005743|GO:0005743|GO:0005739	NP_055066	Solute carrier family 25, member 13 (citrin)
ASHG19A3A004507	138.115	157.994	7.02626	7.38787	coding	NM_006478	GAS2L1	RefSeq_coding	2557	chr22	+	29702996	29708774		TCCCCGGGGCCGCGGGATGAGCCAGCGATCCTGAACTGTGTTCCTGCCCACAGTGACTCG	10634	Hs.322852	GO:0007050|GO:0005737|GO:0005856	NP_689423	Growth arrest-specific 2 like 1
ASHG19A3A017224	116.57	125.929	6.78802	7.06092	coding	NM_173821	C2orf85	RefSeq_coding	1798	chr2	+	242811885	242815482		AGGACTTCTGGATCTGGGTGTCCATGACCGTGTGCGTCTTCTGGCTGATGTGCATGTGTC	285093	Hs.376307	GO:0016021|GO:0016020	NP_776182	Chromosome 2 open reading frame 85
ASHG19A3A047727	2186.08	2194.85	10.9981	11.191	coding	NM_032496	ARHGAP9	RefSeq_coding	2614	chr12	-	57866038	57873633		TCTGTCTTGAACCTGATTCTTTCTTCTTATCTCCTTCCTGTGTCCACCTCAAGACTCCCA	64333	Hs.437126	GO:0005096|GO:0005096|GO:0005515|GO:0051056|GO:0007165|GO:0007264|GO:0005829|GO:0005622	NP_115885	Rho GTPase activating protein 9
ASHG19A3A052439	90.5897	65.8875	6.42584	6.12265	coding	NM_001166694	CHRNA3	RefSeq_coding	2040	chr15	-	78885396	78913637		ACATCCGATCAAGAACCTGGGCTATGAATTTCCAATCTTCAACAACCTGTTAGGAAAAAA	1136	Hs.89605	GO:0042166|GO:0015464|GO:0005230|GO:0015276|GO:0004889|GO:0004889|GO:0004872|GO:0007171|GO:0035095|GO:0007507|GO:0006811|GO:0007626|GO:0007399|GO:0014056|GO:0048814|GO:0060079|GO:0042391|GO:0006940|GO:0042493|GO:0010035|GO:0007165|GO:0007268|GO:0060084|GO:0007271|GO:0030054|GO:0030425|GO:0016021|GO:0043025|GO:0005892|GO:0005886|GO:0005886|GO:0014069|GO:0045211|GO:0045202	NP_001160166	Cholinergic receptor, nicotinic, alpha 3
ASHG19A3A033311	397.848	393.739	8.5457	8.71313	coding	NM_001122838	NAPEPLD	RefSeq_coding	5363	chr7	-	102740022	102789569		GAGGGTTCAGGGGTGGGTCATTTAAATAATGAATTGGCTAATGTGGATTTTAAATTTCAT	222236	Hs.324271	GO:0016787|GO:0046872|GO:0004620|GO:0006629|GO:0009395|GO:0016020	NP_945341	N-acyl phosphatidylethanolamine phospholipase D
ASHG19A3A003465	135.594	99.7443	6.99958	6.71416	coding	NM_001168325	TESC	RefSeq_coding	958	chr12	-	117476729	117537251		TGAGTGGAGATCAGCCTACCATTCGGAACCTGCGCAAGGGACCCAGTGGCCTGGCTGATG	54997	Hs.525709	GO:0005509|GO:0000287|GO:0019212|GO:0005515|GO:0008584|GO:0008285|GO:0010628|GO:0043193|GO:0045654|GO:0033628|GO:0005737|GO:0030027|GO:0005634|GO:0005634|GO:0005886|GO:0001726	NP_060369	Tescalcin
ASHG19A3A012712	61.7146	74.75	5.86532	6.3031	coding	NM_001098825	TMEM91	RefSeq_coding	751	chr19	+	41869870	41889985		AGAGGAGAAAGCGGCAACCGGGGTTGTAGTTCATGGGCTTGACTGCTTCTTTTCTCCGCG	641649	Hs.709417	GO:0009607|GO:0016021|GO:0016020	NP_001092295	Transmembrane protein 91
ASHG19A3A036572	11737.1	10665.4	13.443	13.4529	coding	NM_001135694	VDAC3	RefSeq_coding	1461	chr8	+	42249345	42263413		TTGAAACATCCATAAACCTTGCTTGGACAGCTGGGAGTAACAACACCCGTTTTGGCATTG	7419	Hs.699301	GO:0000166|GO:0015288|GO:0005515|GO:0008308|GO:0015853|GO:0044070|GO:0055085|GO:0016020|GO:0005741|GO:0005739|GO:0046930	NP_005653	Voltage-dependent anion channel 3
ASHG19A3A002112	55.5395	71.371	5.71047	6.23597	coding	NM_001128932	CYP4F11	RefSeq_coding	2973	chr19	-	16023179	16045676		GCAAAGACCTCCTAGCAGAGGGGGAGAGGAGGGATGCCGCAGCTGAGCCTGTCCTGGCTG	57834	Hs.187393	GO:0070330|GO:0009055|GO:0020037|GO:0046872|GO:0004497|GO:0004497|GO:0016705|GO:0006954|GO:0055114|GO:0055114|GO:0006805|GO:0005783|GO:0005789|GO:0016021|GO:0016020|GO:0005792	NP_067010	Cytochrome P450, family 4, subfamily F, polypeptide 11
ASHG19A3A046861	103.438	110.477	6.62035	6.86526	coding	NM_033395	KIAA1731	RefSeq_coding	8044	chr11	+	93394815	93463522		AATAGTTCTACCTACCATCATCTTCACACTTTTGTGAATAGAGAGACAGACACAAAACGG	85459	Hs.458418		NP_203753	KIAA1731
ASHG19A3A006737	736.059	337.106	9.43292	8.4855	coding	NM_032327	ZDHHC16	RefSeq_coding	1816	chr10	+	99205929	99217124	NM_198046,NM_198044,	CCGGGAGGCTTATGCTGCCATTGAGAAAATGAAACAGCTCGACAAGAACAAACTACAGGC	84287	Hs.76662	GO:0008415|GO:0046872|GO:0016740|GO:0008270|GO:0006915|GO:0005783|GO:0005789|GO:0016021|GO:0016020	NP_932163	Zinc finger, DHHC-type containing 16
ASHG19A3A022120	424.819	433.554	8.638	8.85684	coding	NM_018385	LSG1	RefSeq_coding	3589	chr3	-	194361517	194393206		AATCAACACCATCATGGGCAACAAGAAAGTATCTGTGTCTGCCACACCTGGTCACACAAA	55341	Hs.728879	GO:0005525|GO:0016787|GO:0000166|GO:0051168|GO:0015031|GO:0015030|GO:0005737|GO:0005783|GO:0005622|GO:0005634	NP_060855	Large subunit GTPase 1 homolog (S. cerevisiae)
ASHG19A3A002162	324.052	103.973	8.2532	6.77693	coding	NM_001130147	CCDC77	RefSeq_coding	2359	chr12	+	498515	551804		AACGACTCCACGCAGCTCGCCCTTGGTTATTTGGACAAGAGGCACATTGACCCAATTTGG	84318	Hs.631656		NP_115734	Coiled-coil domain containing 77
ASHG19A3A014230	9092.21	7343.41	13.0791	12.9152	coding	NM_080605	B3GALT6	RefSeq_coding	2793	chr1	+	1167628	1170418		AGACCCCCAACAGGAAGAGTCTAAAAATCCAGTTTGCAACCACTTCTGACCTACAAAAAA	126792	Hs.284284	GO:0008499|GO:0035250|GO:0047220|GO:0016757|GO:0006024|GO:0006486|GO:0005794|GO:0032580|GO:0005797|GO:0016021|GO:0016020	NP_542172	UDP-Gal:betaGal beta 1,3-galactosyltransferase polypeptide 6
ASHG19A3A026733	803.145	435.12	9.56256	8.86174	coding	NM_000997	RPL37	RefSeq_coding	1586	chr5	-	40831429	40835387		CTTCAGAACATTCACTTATAAAGAAACCCTGCTGATTAAATCTCTCTTGGGCTTCCTCCC	6167	Hs.80545	GO:0003723|GO:0046872|GO:0005515|GO:0019843|GO:0003735|GO:0044267|GO:0031018|GO:0010467|GO:0006412|GO:0006414|GO:0006415|GO:0019058|GO:0016032|GO:0019083|GO:0005829|GO:0005829|GO:0022625|GO:0005622|GO:0005840	NP_000988	Ribosomal protein L37
ASHG19A3A023462	231.542	172.724	7.76945	7.51611	coding	NM_001168214	LOC401097	RefSeq_coding	2606	chr3	+	159943422	159945999		ATGGATCTCATACATGTTTTTAGAACATTGTTCTTCTGATTGAAGAAGTCTGATGCTCCT	401097	Hs.729755		NP_001161686	Hypothetical protein LOC401097
ASHG19A3A015604	90.5102	79.8441	6.42425	6.39665	coding	NM_001430	EPAS1	RefSeq_coding	5184	chr2	+	46524540	46613842		AAACTCAGAAAAGTGACTCCTTTTCCAGGGAAAAAGGAACTTGGGTTCCCTTCTCTCCGT	2034	Hs.468410	GO:0003677|GO:0035035|GO:0005515|GO:0046982|GO:0043565|GO:0003700|GO:0003705|GO:0004871|GO:0003713|GO:0008134|GO:0030528|GO:0001525|GO:0030154|GO:0007275|GO:0048625|GO:0045944|GO:0006355|GO:0001666|GO:0007165|GO:0006366|GO:0005634|GO:0005667|GO:0005667	NP_001421	Endothelial PAS domain protein 1
ASHG19A3A045268	10222.2	8371.52	13.2471	13.1031	coding	NM_022830	TUT1	RefSeq_coding	2844	chr11	-	62342516	62359109		ATCTCAAGTGAAGACATGGCCCCTGAAGGGCAATAAAGCTGCTAGTTTATTAATACAGTC	64852	Hs.728983	GO:0005524|GO:0003723|GO:0050265|GO:0019899|GO:0003730|GO:0046872|GO:0000166|GO:0016779|GO:0004652|GO:0005515|GO:0016740|GO:0008270|GO:0071044|GO:0006379|GO:0006378|GO:0006378|GO:0016180|GO:0005622|GO:0005847|GO:0016607|GO:0005730|GO:0005634	NP_073741	Terminal uridylyl transferase 1, U6 snRNA-specific
ASHG19A3A048537	2551.12	1703.35	11.2264	10.8203	coding	NM_017842	SLC48A1	RefSeq_coding	3034	chr12	+	48166966	48176535	BC002759,	TCACTTCTGGGGGGCCCTTTCAGAGGCACTTTTAAAGCAAATAAAACATTTATTGTTCAG	55652	Hs.438867	GO:0006810|GO:0005768|GO:0010008|GO:0016021|GO:0005765|GO:0016020	NP_060312	Solute carrier family 48 (heme transporter), member 1
ASHG19A3A020384	4106.24	2379.83	11.9248	11.3041	coding	NM_002133	HMOX1	RefSeq_coding	1550	chr22	+	35777086	35790194		GTTTAACGGCACTGTGGCCTTGGTCTAACTTTTGTGTGAAATAATAAACAACATTGTCTG	3162	Hs.517581	GO:0019899|GO:0020037|GO:0004392|GO:0004392|GO:0004392|GO:0046872|GO:0016491|GO:0004630|GO:0042803|GO:0004871|GO:0008630|GO:0001525|GO:0006916|GO:0008219|GO:0006879|GO:0031670|GO:0001935|GO:0034101|GO:0007588|GO:0042167|GO:0042167|GO:0006788|GO:0007243|GO:0055072|GO:0055072|GO:0034383|GO:0002686|GO:0032764|GO:0043305|GO:0043524|GO:0043433|GO:0048662|GO:0006778|GO:0043123|GO:0045766|GO:0045768|GO:…	NP_002124	Heme oxygenase (decycling) 1
ASHG19A3A051498	2527.24	2271.13	11.2125	11.2391	coding	NM_153811	SLC38A6	RefSeq_coding	1662	chr14	+	61447831	61519259		TTACAAGAATAATATACCCCTAGTTGCAAGAATGAATTATTCCGGAAGACACCCTGGATG	145389	Hs.200738	GO:0006865|GO:0006811|GO:0006814|GO:0016021|GO:0016020	NP_722518	Solute carrier family 38, member 6
ASHG19A3A051747	352.753	392.942	8.3712	8.71046	coding	NM_000623	BDKRB2	RefSeq_coding	4197	chr14	+	96671134	96710666		AGTCCAAATGTTCTCTCCCTGGAAGATATCAATGTTTCTGTCTGTTCGTGAGGACTCCGT	624	Hs.726620	GO:0004930|GO:0004947|GO:0004435|GO:0002020|GO:0005515|GO:0046982|GO:0004872|GO:0031702|GO:0007186|GO:0050482|GO:0008015|GO:0007166|GO:0007204|GO:0006954|GO:0043066|GO:0045776|GO:0008285|GO:0033137|GO:0043114|GO:0019229|GO:0042493|GO:0009651|GO:0006939|GO:0007169|GO:0005768|GO:0005887|GO:0005886|GO:0005886|GO:0005886	NP_000614	Bradykinin receptor B2
ASHG19A3A048276	126.719	115.447	6.90657	6.93071	coding	NM_001164093	COPS7A	RefSeq_coding	2054	chr12	+	6833448	6841039		AATTTTAGACCGCTCCATGTCTGATTCCTCACCGCAGAACCGACTTAGTGCCTTTACAAT	50813	Hs.530823	GO:0005737|GO:0005730|GO:0005634|GO:0008180	NP_057403	COP9 constitutive photomorphogenic homolog subunit 7A (Arabidopsis)
ASHG19A3A025650	11388.1	10241.9	13.4008	13.3929	coding	NM_020368	UTP3	RefSeq_coding	2088	chr4	+	71554195	71556267		GTGTAACTTTTCACATAAAGAGAATGCATCTTTGACAGTTATCTTATTTGTAAGGCAGCC	57050	Hs.322901	GO:0003674|GO:0007420|GO:0016568|GO:0016458|GO:0007275|GO:0005730|GO:0005634	NP_065101	UTP3, small subunit (SSU) processome component, homolog (S. cerevisiae)
ASHG19A3A034805	367.771	160.488	8.43249	7.41205	coding	NM_019606	MEPCE	RefSeq_coding	2769	chr7	+	100027528	100031740		TTCCAGTATGGGAATTATTGCAAATACTATGGGTACCGCAATCCTTCCTGTGAGGATGGG	56257	Hs.178011	GO:0008168|GO:0016740	NP_062552	Methylphosphate capping enzyme
ASHG19A3A047575	320.082	137.145	8.23556	7.18077	coding	NM_147190	LASS5	RefSeq_coding	1986	chr12	-	50523581	50561097		ATAAGAAAAGGCTGGAGGGCCTGTCAAAGCAGCTGGATTGGAATGTCCGAAAAATCCAAT	91012	Hs.270525	GO:0043565|GO:0003700|GO:0050291|GO:0050291|GO:0046513|GO:0008610|GO:0006355|GO:0030148|GO:0006665|GO:0005783|GO:0005789|GO:0016021|GO:0016020|GO:0005792|GO:0031965|GO:0005634	NP_671723	LAG1 homolog, ceramide synthase 5
ASHG19A3A042986	1126.02	924.832	10.0533	9.93659	coding	NM_001007271	DUSP13	RefSeq_coding	1788	chr10	-	76854191	76868970		TGATTTTGACATCAGTGCCTACTTCTCCTCTGCGGCTGACTTCATCCACCGTGCCCTCAA	51207	Hs.178170	GO:0016787|GO:0004725|GO:0008138|GO:0008138|GO:0007126|GO:0006470|GO:0006470|GO:0007283|GO:0005737	NP_057448	Dual specificity phosphatase 13
ASHG19A3A051660	129.943	134.892	6.94185	7.15742	coding	NM_004796	NRXN3	RefSeq_coding	6163	chr14	+	78870092	80330758		TGCTTTCTCAGGGATATGCACTCTGCACTTCCATTCCTGCAGTGAAATTAACTCGAGCTT	9369	Hs.368307	GO:0046872|GO:0004872|GO:0007411|GO:0007155|GO:0016021|GO:0005887|GO:0016020	NP_620426	Neurexin 3
ASHG19A3A053931	81.1885	82.4948	6.26452	6.44076	coding	NM_152649	MLKL	RefSeq_coding	2522	chr16	-	74705752	74734789		AATACCACAGAGCTCCAGTGGCCATAAAAGTATTCAAAAAACTCCAGGCTGGCAGCATTG	197259	Hs.119878	GO:0005524|GO:0005515|GO:0004672|GO:0006468	NP_689862	Mixed lineage kinase domain-like
ASHG19A3A036985	211.11	216.038	7.64012	7.84033	coding	NM_030895	ZNF696	RefSeq_coding	4686	chr8	+	144373558	144382118		AGTTGTCAAATTTCCCACCGGCCCAGCTCATCGAGCTTCTTCCCAGCTGTGAACAGGAGG	79943	Hs.512740	GO:0003677|GO:0046872|GO:0008270|GO:0005622|GO:0005634	NP_112157	Zinc finger protein 696
ASHG19A3A000583	160.617	166.401	7.24642	7.46232	coding	NM_001081755	ELN	RefSeq_coding	3423	chr7	+	73442426	73484234	NM_000501,	TGCAGCCGCTAAAGCAGCTAAATACGGTGCTGCTGGCCTTGGAGGTGTCCTAGGGGGTGC	2006	Hs.647061	GO:0030023|GO:0005201|GO:0005515|GO:0008015|GO:0008283|GO:0009887|GO:0007585|GO:0005576|GO:0005578	NP_001075224	Elastin
ASHG19A3A028366	91.3592	97.1794	6.43829	6.67358	coding	NM_153217	TMEM174	RefSeq_coding	1758	chr5	+	72469022	72470968		ACACCATCTACCCTCAAGATAACTCTGCATTTGTGGTTGATGAGGGCTGCCTTTCTTTCA	134288	Hs.508588	GO:0016021|GO:0016020	NP_694949	Transmembrane protein 174
ASHG19A3A005722	156.13	99.2463	7.20462	6.70694	coding	NM_080590	CAPS	RefSeq_coding	1532	chr19	+	5914192	5916221		CCGCGGGGTGTACAGTGGCCGTGCCCACCCCAAGGTCACACTGGCGGAATTCCAGGACTA	828	Hs.584744	GO:0005509|GO:0035556|GO:0005737	NP_542157	Calcyphosine
ASHG19A3A022302	162.465	66.4194	7.26198	6.13263	coding	NM_001134368	SLC6A6	RefSeq_coding	1286	chr3	+	14444105	14489691		TAAAAATGATACAGTTTTCTTAATGTATTTTAGGAAAAAATATATTCTGTTATTGCACAG	6533	Hs.529488	GO:0015171|GO:0005328|GO:0015293|GO:0030977|GO:0005369|GO:0003333|GO:0006865|GO:0006520|GO:0034641|GO:0006811|GO:0006836|GO:0055085|GO:0006810|GO:0016021|GO:0005887|GO:0005886	NP_003034	Solute carrier family 6 (neurotransmitter transporter, taurine), member 6
ASHG19A3A040590	4520.22	3917.62	12.0686	12.0082	coding	NM_014235	UBL4A	RefSeq_coding	2318	chrX	-	153712057	153714932		TATGAAAGTGAAAAGTCCAGTGGTATTGGCATTGGCAGCAGGTGAGCAATTTCACCCAGT	8266	Hs.76480	GO:0019787|GO:0006464|GO:0071816|GO:0006810|GO:0071818|GO:0005737|GO:0005829	NP_055050	Ubiquitin-like 4A
ASHG19A3A037762	2796.93	2261.72	11.362	11.2325	coding	NM_007001	SLC35D2	RefSeq_coding	1643	chr9	-	99082988	99145992		ATTCACTCAACATCATCCTCAGTGTCTTTGCCATTATTCTCGGGGCTTTCATAGCAGCTG	11046	Hs.494556	GO:0005338|GO:0005338|GO:0008150|GO:0015780|GO:0015780|GO:0055085|GO:0005794|GO:0000139|GO:0005575|GO:0016021|GO:0016020	NP_008932	Solute carrier family 35, member D2
ASHG19A3A006639	61.1811	157.221	5.85149	7.38082	coding	NM_182759	FAM19A3	RefSeq_coding	1077	chr1	+	113263188	113269854		CGGGCAAAGCCCTCCTGCGTGGACGCCTCCATCGTCCTGCAGAGATGGTGGTGTCAGATG	284467	Hs.439116	GO:0005576	NP_877436	Family with sequence similarity 19 (chemokine (C-C motif)-like), member A3
ASHG19A3A038304	442.694	131.215	8.69733	7.11891	coding	NM_014827	ZC3H11A	RefSeq_coding	4795	chr1	+	203764750	203823255	ENST00000431766,ENST00000414090,	TCCAAGTCTCTTAAGGAGCGATTAGGCATGTCAGCTGATCCAGATAATGAGGATGCAACA	9877	Hs.532399	GO:0046872|GO:0003676|GO:0005515|GO:0008270	NP_055642	Zinc finger CCCH-type containing 11A
ASHG19A3A000955	383.674	330.979	8.49465	8.46039	coding	NM_001012514	ITM2C	RefSeq_coding	1982	chr2	+	231729620	231743962		CGAGATCCTGCTGACGCCGGCTAGGCTGGCCCGAGATAACTTCTTCCGCTGTGGTGTGCT	81618	Hs.111577	GO:0005524|GO:0001540|GO:0005515|GO:0012502|GO:0010977|GO:0030182|GO:0030182|GO:0005794|GO:0016021|GO:0005765|GO:0005764|GO:0005764|GO:0016020|GO:0048471	NP_112188	Integral membrane protein 2C
ASHG19A3A040608	206.448	219.986	7.60535	7.86638	coding	NM_001162936	LOC100132963	RefSeq_coding	1028	chrX	-	154051623	154062937		TCTCCTTTGCCTTTGTCTGCCTTGGGAATACAAGAAAAAACAGGATCGAAACCACGCTCA	100132963	Hs.220762	GO:0016021|GO:0005886	NP_001156408	Hypothetical protein LOC100132963
ASHG19A3A048663	120.411	162.019	6.83308	7.42461	coding	NM_004503	HOXC6	RefSeq_coding	1681	chr12	+	54422193	54424606		TAGACCGACCAGGTAAAGGCAAAGGGATGAATTCCTACTTCACTAACCCTTCCTTATCCT	3221	Hs.549040	GO:0043565|GO:0003700|GO:0030528|GO:0009952|GO:0051216|GO:0048562|GO:0007275|GO:0006355|GO:0006351|GO:0005634	NP_705897	Homeobox C4
ASHG19A3A038367	471.364	588.384	8.78628	9.29312	coding	NM_000550	TYRP1	RefSeq_coding	2876	chr9	+	12693385	12710265		TTTGTCCTCCTGCACACCTTCACAGATGCAGTCTTTGATGAATGGCTGAGGAGATACAAT	7306	Hs.270279	GO:0005507|GO:0046872|GO:0016716|GO:0005515|GO:0046982|GO:0042803|GO:0043438|GO:0042438|GO:0030318|GO:0032438|GO:0055114|GO:0043473|GO:0030669|GO:0010008|GO:0016021|GO:0042470|GO:0033162|GO:0016020	NP_000541	Tyrosinase-related protein 1
ASHG19A3A043413	9339.45	8311.82	13.119	13.0912	coding	NM_031280	MRPS15	RefSeq_coding	965	chr1	-	36921361	36930040		AAGCAAGAACAGTTTATGAAGAAGATTGTTGCAAACCCAGAGGACACCAGATCCCTGGAG	64960	Hs.352839	GO:0003735|GO:0006412|GO:0005622|GO:0005763|GO:0005739|GO:0031965|GO:0005840	NP_112570	Mitochondrial ribosomal protein S15
ASHG19A3A029219	157.765	115.857	7.22089	6.93562	coding	NM_012279	ZNF346	RefSeq_coding	3089	chr5	+	176449696	176493743		AAGAACCAATGTCTCTTCACCAACACCCAGTGTAAGGTTTGCTGCGCCTTGCTTATTTCT	23567	Hs.484259	GO:0003725|GO:0046872|GO:0008270|GO:0006915|GO:0005737|GO:0005622|GO:0005730|GO:0005634	NP_036411	Zinc finger protein 346
ASHG19A3A002251	203.534	75.5477	7.5851	6.31805	coding	NM_001134406	RUNDC3B	RefSeq_coding	3903	chr7	+	87257728	87461612		TAATTGTGGAGCTTCAAGATCAGCTGAAAAGTTATCAAAGTCTTGACCAGTTATCAGCAG	154661	Hs.411488		NP_612147	RUN domain containing 3B
ASHG19A3A011031	17500.7	15507.2	14.0267	13.9928	coding	NM_001031734	FDX1L	RefSeq_coding	852	chr19	-	10420890	10426691		AATCAGGGTTTGAGTAGGAGTGGACTCATATTGGAGCTGCAATAAATCGATAACACAGGC	112812	Hs.654865	GO:0051537|GO:0009055|GO:0046872|GO:0022900|GO:0006810|GO:0005759|GO:0005739	NP_001026904	Ferredoxin 1-like
ASHG19A3A040962	749.956	490.796	9.45978	9.03792	coding	NM_181532	ERAS	RefSeq_coding	1266	chrX	+	48687282	48688548		ATTAAATAAATGGTGTTTTGGGTTTCAAAGCTGCCTCCATGCCGAGTGTTGTGTGGGTGG	3266	Hs.447330	GO:0005525|GO:0003924|GO:0000166|GO:0007165|GO:0007264|GO:0005622|GO:0005886	NP_853510	ES cell expressed Ras
ASHG19A3A044667	463.482	219.1	8.76127	7.86077	coding	NM_018461	PPP2R2D	RefSeq_coding	2466	chr10	+	133747959	133770051		GAGTCCACGGCGAATTTTTGCAAATGCTCACACATATCATATAAATTCCATTTCAGTAAA	55844	Hs.380372	GO:0008601|GO:0010458|GO:0007067|GO:0007165|GO:0005737|GO:0000159	NP_060931	Protein phosphatase 2, regulatory subunit B, delta
ASHG19A3A044039	148.812	98.7738	7.1356	6.69901	coding	NM_022120	OXCT2	RefSeq_coding	1824	chr1	-	40235196	40237020		CCTAGGTGGACAGTGCTCCTCTAGAGAGCTGCGACTTTAATTAAAAACAACAGGAAAACA	64064	Hs.472491	GO:0008260|GO:0016740|GO:0046952|GO:0008152|GO:0009434|GO:0005739	NP_071403	3-oxoacid CoA transferase 2
ASHG19A3A025547	147.514	173.953	7.12168	7.52714	coding	NM_006452	PAICS	RefSeq_coding	3350	chr4	+	57301914	57327534		AGTAACGGACTTAACCTCATTTCTCTTTCAGAGCATTTAGCCTTCATATGCCCTTCCCTG	10606	Hs.518774	GO:0005524|GO:0042802|GO:0016874|GO:0016829|GO:0000166|GO:0004638|GO:0004639|GO:0005515|GO:0006189|GO:0055086|GO:0009113|GO:0006144|GO:0006164|GO:0009168|GO:0005829	NP_006443	Phosphoribosylaminoimidazole carboxylase, phosphoribosylaminoimidazole succinocarboxamide synthetase
ASHG19A3A012485	320.537	263.509	8.23797	8.12631	coding	NM_057182	CCNE1	RefSeq_coding	1787	chr19	+	30303560	30315218	NM_001238,	TGAGCAACACCCTCTTCTGCAGCCAAAAATGCGAGCAATTCTTCTGGATTGGTTAATGGA	898	Hs.244723	GO:0050681|GO:0016538|GO:0016301|GO:0005515|GO:0032403|GO:0003713|GO:0006270|GO:0000082|GO:0000082|GO:0030521|GO:0001547|GO:0051301|GO:0031670|GO:0001889|GO:0000278|GO:0031100|GO:0045597|GO:0045893|GO:0006468|GO:0051726|GO:0000083|GO:0051412|GO:0034097|GO:0042493|GO:0032355|GO:0045471|GO:0051597|GO:0010243|GO:0032570|GO:0014074|GO:0033197|GO:0005813|GO:0000307|GO:0005737|GO:0005829|GO:0005730|GO:…	NP_476530	Cyclin E1
ASHG19A3A033283	3299.4	2638.09	11.6118	11.4554	coding	NM_014343	CLDN15	RefSeq_coding	1258	chr7	-	100875373	100881116		CCCCGCACGTTTGTATTGTGTATAAATACATTCATTAATAAATGCATATTGTGACCGTTC	24146	Hs.38738	GO:0042802|GO:0005198|GO:0016338|GO:0034329|GO:0045216|GO:0070830|GO:0030054|GO:0016021|GO:0005886|GO:0005923	NP_055158	Claudin 15
ASHG19A3A044712	156.254	276.714	7.20602	8.19935	coding	NM_001135054	SIGIRR	RefSeq_coding	1761	chr11	-	405715	414999		TTGCTCCCAAAGGCGCACCAATGACCAACATTTGCCCCCCGGAGGAAAGAACTGGAACCA	59307	Hs.501624	GO:0005515|GO:0004888|GO:0006953|GO:0045087|GO:0045079|GO:0001960|GO:0031665|GO:0043433|GO:0007165|GO:0016021|GO:0016020	NP_068577	Single immunoglobulin and toll-interleukin 1 receptor (TIR) domain
ASHG19A3A006122	1067.16	329.225	9.97629	8.45288	coding	NM_152298	NASP	RefSeq_coding	2306	chr1	+	46049716	46084567		GTAGAAAATAATGATAACATAGATGAAACTGAAGGCTCAGAAGAGGATGATAAAGAAAAT	4678	Hs.319334	GO:0051879|GO:0005515|GO:0006260|GO:0001824|GO:0007049|GO:0008283|GO:0043486|GO:0015031|GO:0005737|GO:0005634	NP_689511	Nuclear autoantigenic sperm protein (histone-binding)
ASHG19A3A034142	3682.56	1706.62	11.7722	10.8241	coding	NM_002047	GARS	RefSeq_coding	2759	chr7	+	30634180	30673646		ACATGGAGAATGAGATGGCCCATTATGCCTGTGACTGTTGGGATGCAGAATCCAAAACAT	2617	Hs.404321	GO:0005524|GO:0004820|GO:0004820|GO:0016874|GO:0000166|GO:0046983|GO:0008219|GO:0015966|GO:0010467|GO:0006426|GO:0045055|GO:0006418|GO:0005737|GO:0005829|GO:0005759|GO:0005739|GO:0005625|GO:0030141	NP_002038	Glycyl-tRNA synthetase
ASHG19A3A045302	5269.71	3865.6	12.2842	11.9912	coding	NM_007069	PLA2G16	RefSeq_coding	1395	chr11	-	63341943	63381909		GTGGGGTCTGGAGACGCAGTTTCCTGTTAATGACAATAAATCCCTGCTCCCCCTGCCTCA	11145	Hs.502775	GO:0016787|GO:0003674|GO:0004623|GO:0005515|GO:0008150|GO:0016042|GO:0045786|GO:0005575|GO:0005737|GO:0016021|GO:0048471|GO:0005886	NP_009000	Phospholipase A2, group XVI
ASHG19A3A006291	813.165	741.062	9.58003	9.62462	coding	NM_172081	CAMK2B	RefSeq_coding	4097	chr7	-	44256748	44365230		CCCAAAGGGACGCTTCCTCCTGCCGCCCTGGAGTCTTCTGACAGTGCCAATACCACCATA	816	Hs.351887	GO:0005524|GO:0005516|GO:0004683|GO:0000166|GO:0005515|GO:0016740|GO:0019221|GO:0060333|GO:0006468|GO:0007165|GO:0007268|GO:0005829|GO:0005829|GO:0030666|GO:0005654|GO:0005886	NP_742081	Calcium/calmodulin-dependent protein kinase II beta
ASHG19A3A043221	463.933	846.828	8.76316	9.81466	coding	NM_005066	SFPQ	RefSeq_coding	3073	chr1	-	35649202	35658743		AAAGGCATTGTTGAATTTGCTTCTAAGCCAGCAGCAAGAAAGGCATTTGAACGATGCAGT	6421	Hs.355934	GO:0003677|GO:0003723|GO:0000166|GO:0005515|GO:0006310|GO:0006281|GO:0008380|GO:0000380|GO:0006397|GO:0016363|GO:0005654|GO:0005634|GO:0042382	NP_005057	Splicing factor proline/glutamine-rich
ASHG19A3A001839	356.5	329.21	8.38691	8.4528	coding	NM_001104558	ELOVL7	RefSeq_coding	3851	chr5	-	60047616	60140101		GCGCTTCGGCTCCGCTCCCTGTGCGAACCCATTAAAAGAGCCAGTAAATCCTGTGGAAAA	79993	Hs.274256	GO:0009922|GO:0005515|GO:0016740|GO:0016747|GO:0044255|GO:0034626|GO:0035338|GO:0019432|GO:0042761|GO:0005783|GO:0005789|GO:0016021|GO:0016020	NP_079206	ELOVL family member 7, elongation of long chain fatty acids (yeast)
ASHG19A3A003894	27539.4	22858.7	14.6821	14.545	coding	NM_001349	DARS	RefSeq_coding	2322	chr2	-	136664253	136743222		TACCATGCCTGACCCAAGAAATCCCAAACAGTCCAACTCTTACGATATGTTCATGAGAGG	1615	Hs.503787	GO:0005524|GO:0004046|GO:0004815|GO:0016874|GO:0003676|GO:0000166|GO:0005515|GO:0006422|GO:0010467|GO:0006461|GO:0006418|GO:0006412|GO:0005737|GO:0005829|GO:0031965|GO:0005634|GO:0005886|GO:0005625	NP_001340	Aspartyl-tRNA synthetase
ASHG19A3A001808	2420.71	1415.33	11.1504	10.5522	coding	NM_001102	ACTN1	RefSeq_coding	3743	chr14	-	69340840	69446083		TTATGATATTGGCAACGACCCCCAGGGAGAAGCAGAATTTGCCCGCATCATGAGCATTGT	87	Hs.509765	GO:0003779|GO:0005509|GO:0005178|GO:0005515|GO:0017166|GO:0007596|GO:0034329|GO:0048041|GO:0051271|GO:0030168|GO:0002576|GO:0042981|GO:0015629|GO:0005737|GO:0005829|GO:0005576|GO:0005925|GO:0005730|GO:0031093|GO:0031143|GO:0030017	NP_001123477	Actinin, alpha 1
ASHG19A3A006061	1006.88	854.782	9.89223	9.82781	coding	NM_147148	GSTM4	RefSeq_coding	1372	chr1	+	110198697	110208123		GAAGGACTTCATCTCCCGCTTTGAGGTTTCCTGTGGCATAATGTGATGGTCAATTTTCTG	2948	Hs.348387	GO:0004364|GO:0016740|GO:0008152|GO:0018916|GO:0042178|GO:0006805|GO:0005737|GO:0005789	NP_671489	Glutathione S-transferase mu 4
ASHG19A3A008117	619.344	668.684	9.17643	9.47424	coding	NM_138463	TLCD1	RefSeq_coding	1037	chr17	-	27051367	27053230		GCACAACCTGCTCGTCTCCTTCGCTCACTCCATTGTGTCGGGGATCTGGGCACTGCTGTG	116238	Hs.499952	GO:0016021|GO:0016020	NP_612472	TLC domain containing 1
ASHG19A3A034125	560.38	564.178	9.03219	9.23305	coding	NM_001080529	WIPF3	RefSeq_coding	3241	chr7	+	29874340	29945791		ATTCTGTGGAAGACTTTCCCCCTCCGGATGAATATAAACCATGCCAGAAGATTTACCCCA	644150	Hs.709280	GO:0017124|GO:0003779|GO:0030154|GO:0007275|GO:0007283|GO:0005737	NP_001073998	WAS/WASL interacting protein family, member 3
ASHG19A3A026519	180.03	175.979	7.40689	7.54599	coding	NM_019599	TAS2R1	RefSeq_coding	1355	chr5	-	9629108	9630463		AAAGCAGCCTGTTCATAAATATACAACATGTCCCCTTCAGGCCTGTTTATCCAGCCTGAG	50834	Hs.567492	GO:0004872|GO:0008527|GO:0007186|GO:0007635|GO:0050896|GO:0050909|GO:0016021|GO:0016020	NP_062545	Taste receptor, type 2, member 1
ASHG19A3A007969	612.551	324.921	9.16258	8.43476	coding	NM_145301	FAM18B2	RefSeq_coding	1632	chr17	-	15405577	15466945		GGGCGGGGACTAATGTGTAAGGCTTAACAGATCCAATTCCAGAAATTATCTGTGTTTTTT	201158	Hs.647422	GO:0016021|GO:0016020	NP_660344	Family with sequence similarity 18, member B2
ASHG19A3A054818	834.012	1629.91	9.61451	10.7574	coding	NM_130897	DYNLRB2	RefSeq_coding	506	chr16	+	80574853	80584539		AGCGACACTGGGTTGGAAACACTTGGCTCTCTCATGAGTATTAAAATTCTATTTCAATCT	83657	Hs.98849	GO:0003777|GO:0007018|GO:0006810|GO:0005737|GO:0005868|GO:0005868|GO:0005856|GO:0005874	NP_570967	Dynein, light chain, roadblock-type 2
ASHG19A3A041102	187.823	122.618	7.46806	7.02207	coding	NM_002444	MSN	RefSeq_coding	3981	chrX	+	64887510	64961792		GGAGGGGTTTATGCTCAATCCATGTTCTATTTCAGTGCCAATAAAATTTAGGAAGACTTC	4478	Hs.87752	GO:0050839|GO:0008092|GO:0005515|GO:0005102|GO:0005200|GO:0006928|GO:0007159|GO:0050900|GO:0022614|GO:0045177|GO:0016324|GO:0005737|GO:0005856|GO:0019898|GO:0030175|GO:0005902|GO:0031528|GO:0005730|GO:0005634|GO:0005886	NP_002435	Moesin
ASHG19A3A040385	817.003	947.558	9.58582	9.97068	coding	NM_001127197	ELF4	RefSeq_coding	4096	chrX	-	129198895	129244688		CGCGAAGTGTGGGAGAGCCCTGCGCCTCGCCCGCCCGGACCAGCCTGCCCCGGCGCCGAG	2000	Hs.271940	GO:0005515|GO:0043565|GO:0003700|GO:0016563|GO:0001866|GO:0001787|GO:0045944|GO:0006355|GO:0006351|GO:0016605|GO:0005634	NP_001412	E74-like factor 4 (ets domain transcription factor)
ASHG19A3A048443	2471.98	2353.65	11.1805	11.2889	coding	NM_018638	ETNK1	RefSeq_coding	7101	chr12	+	22778075	22843607		TTGGGGATTGTGGGCTTTGATTCAAGCCAAATACTCCACTATTGAGTTTGATTTCCTTGG	55500	Hs.29464	GO:0005524|GO:0004305|GO:0000166|GO:0006646|GO:0008654|GO:0005737	NP_061108	Ethanolamine kinase 1
ASHG19A3A004443	124.254	117.348	6.87878	6.95501	coding	NM_005848	DENND4A	RefSeq_coding	7205	chr15	-	65952958	66084631		CACACTTATCACAAACAACTCTCTCAGGTGGCCAGTCTGATCTTGGATATAATTCATTAT	10260	Hs.654567	GO:0003677|GO:0005515|GO:0006355|GO:0005634	NP_005839	DENN/MADD domain containing 4A
ASHG19A3A024794	121.194	109.073	6.84147	6.84773	coding	NM_198549	FAM73A	RefSeq_coding	5292	chr1	+	78245308	78344077		GAAGCCTGTGGTTCCATTAAACTGGGTGCAGGAGATGCCATTGCTGAAGAAAATGTAGAT	374986	Hs.632419	GO:0016021|GO:0016020	NP_940951	Family with sequence similarity 73, member A
ASHG19A3A050576	8400.53	5396.5	12.9623	12.4794	coding	NM_019852	METTL3	RefSeq_coding	1975	chr14	-	21966282	21979457		AATTATTTGGGTGAAGACAAATCAACTGCAACGCATCATTCGGACAGGCCGTACAGGTCA	56339	Hs.168799	GO:0003723|GO:0016422|GO:0008168|GO:0016740|GO:0001510|GO:0010467|GO:0006139|GO:0016607|GO:0005654|GO:0005634	NP_062826	Methyltransferase like 3
ASHG19A3A029267	134.873	189.929	6.99216	7.65071	coding	NM_001142298	SQSTM1	RefSeq_coding	2931	chr5	+	179233387	179265075		CGCACAGGCAGAAGAGCAGCAGCGTCAGGAAGGTGCCATTGCGGAGCCTCATCTCCTCGG	8878	Hs.709030	GO:0042169|GO:0046872|GO:0005515|GO:0005080|GO:0019901|GO:0030971|GO:0043130|GO:0043130|GO:0008270|GO:0006916|GO:0006915|GO:0006914|GO:0030154|GO:0016197|GO:0008624|GO:0035556|GO:0016236|GO:0048011|GO:0045944|GO:0008104|GO:0043122|GO:0006950|GO:0006511|GO:0005737|GO:0005829|GO:0005829|GO:0005770|GO:0005654|GO:0005634	NP_003891	Sequestosome 1
ASHG19A3A000737	21554.5	14910.9	14.3156	13.9268	coding	NM_001003396	TPD52L1	RefSeq_coding	1327	chr6	+	125474878	125584644		ATTCCATAAGTATGCCTGCTATGAGACGAAAGTAGGCGGTACGAACCCTAATGGAGGCAG	7164	Hs.591347	GO:0008656|GO:0042802|GO:0005515|GO:0046982|GO:0042803|GO:0006309|GO:0000086|GO:0006917|GO:0046330|GO:0043406|GO:0005737|GO:0048471	NP_003278	Tumor protein D52-like 1
ASHG19A3A047561	98.984	83.9127	6.55891	6.46471	coding	NM_001008223	C1QL4	RefSeq_coding	2065	chr12	-	49726199	49730971		TGGAGGAACCAGTGAATTCTTTCCTGGCATTTAAAACGCATTCTGTACAGTCCCCATTCC	338761	Hs.380386	GO:0005576	NP_001008224	Complement component 1, q subcomponent-like 4
ASHG19A3A049046	3350.29	1063.63	11.631	10.139	coding	NM_005475	SH2B3	RefSeq_coding	5425	chr12	+	111843751	111889426		CACATTGTGATAACATAAAGTGGATTCATCTTGTATCATTATAGGCAGAAGGTATTTGGC	10019	Hs.506784	GO:0004871|GO:0007596|GO:0030154|GO:0035162|GO:0035556|GO:0005829	NP_005466	SH2B adaptor protein 3
ASHG19A3A014661	226.054	226.926	7.73522	7.90803	coding	NM_001002258	ATP5G3	RefSeq_coding	2741	chr2	-	176040986	176046391		CCTGGGTGGGAAGAACAGGCCCCTGGAGGGCACTTGACCTTAAGCCTCTTTTCCTCCGCA	518	Hs.429	GO:0015078|GO:0008289|GO:0005515|GO:0005215|GO:0015991|GO:0015986|GO:0007568|GO:0006811|GO:0045471|GO:0006810|GO:0016021|GO:0016020|GO:0031966|GO:0005753|GO:0005739|GO:0045263	NP_001680	ATP synthase, H+ transporting, mitochondrial Fo complex, subunit C3 (subunit 9)
ASHG19A3A011205	75.6629	91.7092	6.16186	6.58985	coding	NM_001080421	UNC13A	RefSeq_coding	9847	chr19	-	17712137	17799008		AGAAACGCAAGTTTGCGACCAAATCCAAGAACAATAGCTGGGCTCCCAAGTACAATGAGA	23025	Hs.164502	GO:0019992|GO:0046872|GO:0050435|GO:0006887|GO:0035556|GO:0016188|GO:0030054|GO:0005737|GO:0005886|GO:0042734|GO:0045202	NP_001073890	Unc-13 homolog A (C. elegans)
ASHG19A3A005846	85.4845	71.3156	6.33662	6.23496	coding	NM_138316	PANK1	RefSeq_coding	2525	chr10	-	91342748	91403647		GGACAACTATAAAAGAGTTACAGGGACCAGCTTTGGCAACATGATGAGTAAAGAAAAGCG	53354	Hs.376351	GO:0005524|GO:0000166|GO:0004594|GO:0016740|GO:0015937|GO:0009108|GO:0015939|GO:0006766|GO:0006767|GO:0005737|GO:0005829|GO:0005730|GO:0005634	NP_683879	Pantothenate kinase 1
ASHG19A3A013410	67041.5	79854.6	16.0215	16.285	coding	NM_001134693	OST4	RefSeq_coding	509	chr2	-	27293343	27294567		CCCAGTATAGGGGCTTGCTTTTCTACTCCCTCCCCCCAATATAAAAATATAGACTTTTTT	100128731	Hs.502948	GO:0016021|GO:0016020	NP_001128165	Oligosaccharyltransferase 4 homolog (S. cerevisiae)
ASHG19A3A039285	562.325	363.114	9.03704	8.60007	coding	NM_002540	ODF2	RefSeq_coding	3772	chr9	+	131218431	131263238		AACATCAGGCTTCCCAGAAGGAAAATAAACAGCTGAGTCTGAAGGTGGATGAACTGGAGA
ASHG19A3A021655	703.958	281.228	9.37089	8.22229	coding	NM_006219	PIK3CB	RefSeq_coding	3213	chr3	-	138374232	138478185		AAGTTGTGAGCACCTCTGAAACAATTGCTGACATTCAGCTGAACAGTAGCAATGTGGCTG	5291	Hs.239818	GO:0016303|GO:0005524|GO:0004428|GO:0043560|GO:0000166|GO:0046934|GO:0016773|GO:0007186|GO:0050852|GO:0000187|GO:0007596|GO:0006874|GO:0006935|GO:0040016|GO:0008543|GO:0007156|GO:0008286|GO:0050900|GO:0048011|GO:0046854|GO:0048015|GO:0030168|GO:0001952|GO:0007165|GO:0005829|GO:0005829|GO:0005942	NP_006210	Phosphoinositide-3-kinase, catalytic, beta polypeptide
ASHG19A3A005789	132.373	166.596	6.96693	7.46475	coding	NM_130853	PTPRS	RefSeq_coding	6006	chr19	-	5205519	5340814		GTGCGGCAGCGCACGCTGCAGTCCATCTCGCCCAAGAACTTCAAGGTGAAAATGATCATG	5802	Hs.728875	GO:0016787|GO:0005515|GO:0004872|GO:0005001|GO:0007155|GO:0006470|GO:0005887|GO:0016020	NP_570925	Protein tyrosine phosphatase, receptor type, S
ASHG19A3A004968	91.9812	79.2047	6.4493	6.38454	coding	NM_017740	ZDHHC7	RefSeq_coding	3168	chr16	-	85008066	85045141		CCTGAGAACCATGCTCACCGACCCTGGGGCAGTACCCAAAGGAAACGCTACGAAAGAATA	55625	Hs.461610	GO:0008415|GO:0046872|GO:0005515|GO:0016740|GO:0008270|GO:0016021|GO:0016020	NP_060210	Zinc finger, DHHC-type containing 7
ASHG19A3A002890	145.406	382.612	7.09978	8.67194	coding	NM_001145966	MKI67	RefSeq_coding	11427	chr10	-	129894926	129924468		CAAGATCTAGCTTCTCTTCTGACCCTGATGAGAGTGAGGGAATACCTTTGAAAAGAAGGC	4288	Hs.80976	GO:0005524|GO:0000166|GO:0008022|GO:0005515|GO:0007049|GO:0008283|GO:0005694|GO:0005730|GO:0005634	NP_002408	Antigen identified by monoclonal antibody Ki-67
ASHG19A3A036021	89.4074	205.195	6.40626	7.76617	coding	NM_005655	KLF10	RefSeq_coding	2968	chr8	-	103661004	103667983		ACGGCGCTGAGCGCGGCGGCGGCGGGAGCGGCGTCGAGTGTCTCCGTGCGCCCGTCTGTG	7071	Hs.435001	GO:0003677|GO:0046872|GO:0005515|GO:0003700|GO:0008270|GO:0008283|GO:0007267|GO:0006917|GO:0008285|GO:0000122|GO:0001501|GO:0006351|GO:0007179|GO:0005622|GO:0005634	NP_005646	Kruppel-like factor 10
ASHG19A3A053778	12915	13767.4	13.5873	13.8227	coding	NM_007006	NUDT21	RefSeq_coding	4407	chr16	-	56463048	56485261		AGACTGGGTCATTGACGATTGCATTGGTAACTGGTGGAGACCAAATTTTGAACCTCCTCA	11051	Hs.528834	GO:0017091|GO:0003723|GO:0042826|GO:0016787|GO:0003729|GO:0005515|GO:0042803|GO:0008380|GO:0010467|GO:0031124|GO:0006378|GO:0006397|GO:0006397|GO:0000398|GO:0051262|GO:0006369|GO:0006366|GO:0005813|GO:0005849|GO:0005654|GO:0005634|GO:0042382	NP_008937	Nudix (nucleoside diphosphate linked moiety X)-type motif 21
ASHG19A3A046751	1932.56	2450.4	10.8276	11.3455	coding	NM_014288	ITGB3BP	RefSeq_coding	892	chr1	-	63906461	63988835		GTCTATTTGCTTCTCCCACAAGTTCTGAAGAGCAAAAGCACAGAAATGGACTATCAAATG	23421	Hs.166539	GO:0008022|GO:0004871|GO:0034080|GO:0000087|GO:0006915|GO:0007155|GO:0008624|GO:0000278|GO:0000236|GO:0048011|GO:0006334|GO:0007165|GO:0000775|GO:0005737|GO:0005829|GO:0005829|GO:0005624|GO:0005730|GO:0005654|GO:0005654|GO:0005634	NP_055103	Integrin beta 3 binding protein (beta3-endonexin)
ASHG19A3A040330	132864	150242	17.0418	17.1599	coding	NM_001000	RPL39	RefSeq_coding	401	chrX	-	118920468	118925606		TCTGTTATGAACACGTTGGTTGGCTGGATTCAGTAATAAATATGTAAGGCCTTTCTTTTT	6170	Hs.558387	GO:0003723|GO:0003735|GO:0044267|GO:0031018|GO:0010467|GO:0006412|GO:0006414|GO:0006415|GO:0019058|GO:0016032|GO:0019083|GO:0005829|GO:0005829|GO:0022625|GO:0005622|GO:0005840	NP_000991	Ribosomal protein L39
ASHG19A3A029689	2491.88	2212.8	11.1918	11.203	coding	NM_002117	HLA-C	RefSeq_coding	1543	chr6	-	31236529	31239855		TGGTTGTCCTAGCTGTCCTTGGAGCTGTGGTCACCGCTATGATGTGTAGGAGGAAGAGCT	3106	Hs.654404	GO:0032393|GO:0005515|GO:0019882|GO:0002474|GO:0019221|GO:0006952|GO:0006955|GO:0060333|GO:0044419|GO:0050776|GO:0060337|GO:0042612|GO:0016021|GO:0005887|GO:0005624|GO:0005886|GO:0005886	NP_005505	Major histocompatibility complex, class I, B
ASHG19A3A004607	236.961	215.728	7.80322	7.83747	coding	NM_007311	TSPO	RefSeq_coding	665	chr22	+	43547534	43559247		TTCCCGGAGCGTGCCCTCGCCGCTGGTACGGCTCCTACCTGGTCTGGAAAGAGCTGGGAG	706	Hs.202	GO:0005497|GO:0008503|GO:0015485|GO:0004872|GO:0030325|GO:0007568|GO:0006820|GO:0006915|GO:0048266|GO:0008283|GO:0071476|GO:0071222|GO:0071294|GO:0060242|GO:0008347|GO:0006783|GO:0060253|GO:0045019|GO:0032720|GO:0014012|GO:0043065|GO:0051928|GO:0060252|GO:0051901|GO:0010940|GO:0006626|GO:0032374|GO:0050810|GO:0048678|GO:0042493|GO:0010042|GO:0032570|GO:0006950|GO:0033574|GO:0010266|GO:0008202|GO:…	NP_009295	Translocator protein (18kDa)
ASHG19A3A051158	403.067	393.12	8.56387	8.71108	coding	NM_001012758	NUDT17	RefSeq_coding	1093	chr1	-	145586493	145589435		ATACCATCACATTGTTCTGTATCTACTCGTGATCTCCCAGGAATCACAGCAGCAGTTGCA	200035	Hs.585066	GO:0016787|GO:0046872	NP_001012776	Nudix (nucleoside diphosphate linked moiety X)-type motif 17
ASHG19A3A053907	92.8343	128.251	6.46253	7.08808	coding	NM_015020	PHLPP2	RefSeq_coding	7919	chr16	-	71678853	71748704		TGTAAAAGGCTGCACACCCTTGTTGCACACTCCAACAACATCAGCATTTTCCCAGAAATA	23035	Hs.709458	GO:0016787|GO:0046872|GO:0004721|GO:0005737|GO:0016020|GO:0005634	NP_055835	PH domain and leucine rich repeat protein phosphatase 2
ASHG19A3A054286	1098.14	496.77	10.0169	9.05473	coding	NM_002484	NUBP1	RefSeq_coding	1265	chr16	+	10837697	10863208		TAAAACACAAAATCTTGGTATTGTCTGGGAAAGGCGGTGTTGGGAAAAGCACATTCAGCG	4682	Hs.81469	GO:0051539|GO:0005524|GO:0051536|GO:0046872|GO:0017111|GO:0000166|GO:0005515|GO:0016049|GO:0006879|GO:0016226|GO:0005737|GO:0005829	NP_002475	Nucleotide binding protein 1 (MinD homolog, E. coli)
ASHG19A3A047014	180.29	189.113	7.40855	7.64447	coding	NM_015157	PHLDB1	RefSeq_coding	5695	chr11	+	118477212	118528741		TGGAATTTAGACCAGACTTACAGGCTTTCTGCTCCTTCCTTCAGTGAAGAAGAGTCTCCA	23187	Hs.504062		NP_055972	Pleckstrin homology-like domain, family B, member 1
ASHG19A3A020501	3161.16	3425.74	11.5431	11.8188	coding	NM_003216	TEF	RefSeq_coding	4382	chr22	+	41777962	41795328		GGTCCTTCCCCCTGGTCCTGAAGAAGCTGATGGAGAACCCCCCGCGCGAGGCGCGCCTCG	7008	Hs.181159	GO:0003702|GO:0046983|GO:0043565|GO:0003700|GO:0006357|GO:0048511|GO:0005634	NP_003207	Thyrotrophic embryonic factor
ASHG19A3A016015	74.1292	87.7896	6.13285	6.52613	coding	NM_020184	CNNM4	RefSeq_coding	4814	chr2	+	97426638	97477626		AGAACAAGCGTGACTTCTCTGCCTTCAAGGATGCGGACAATGAGCTCAAAGTGAAAATCT	26504	Hs.175043	GO:0031214|GO:0006811|GO:0050896|GO:0007601|GO:0016021|GO:0005886	NP_064569	Cyclin M4
ASHG19A3A014619	650.136	880.848	9.25236	9.86664	coding	NM_004405	DLX2	RefSeq_coding	2308	chr2	-	172964166	172967478		AGTTTAGCAGTGACCTCAGCAACCCCTCCTTTTTATTTTTTCCTTTAAAAACATTTCAGT	1746	Hs.419	GO:0003682|GO:0043565|GO:0003700|GO:0003727|GO:0030528|GO:0007420|GO:0048755|GO:0051216|GO:0030154|GO:0021893|GO:0048701|GO:0048706|GO:0021879|GO:0021766|GO:0007275|GO:0048715|GO:0000122|GO:0042475|GO:0021772|GO:0045944|GO:0009954|GO:0021882|GO:0006355|GO:0006351|GO:0005634	NP_004396	Distal-less homeobox 2
ASHG19A3A004056	176.329	276.334	7.37774	8.19699	coding	NM_002636	PHF1	RefSeq_coding	2206	chr6	+	33378772	33384229		GGCTCATCTGCAGAGGGCACTGCAGCAGCCCCATCCGGATGTTTGCTTCCTTCCACCCTT	5252	Hs.166204	GO:0046872|GO:0003676|GO:0003700|GO:0008270|GO:0016568|GO:0006351|GO:0005634	NP_077084	PHD finger protein 1
CUST_15_PI426249100	198.972	226.593	7.54938	7.90625	coding	NM_018953_Exon1+	NM_018953	HOX cluster	529	chr12	+	54426831	54427360	uc.344+,NM_018953,	TATAAGCAGAGCCCCAATATCCCTGCCTATAACATGCAAACTTGTGGGAACTATGGATCG
ASHG19A3A013502	1447.42	1382.59	10.4123	10.5195	coding	NM_022366	TFB2M	RefSeq_coding	1799	chr1	-	246703867	246729565		TAATATATTTTTTCACTTGTTAAAGCACTGTTTTGGGAGGCGCAGCGCCACTGTAATAGA	64216	Hs.7395	GO:0008168|GO:0005515|GO:0000179|GO:0008649|GO:0003712|GO:0016740|GO:0045893|GO:0006390|GO:0006390|GO:0006391|GO:0006391|GO:0005759|GO:0005759|GO:0042645|GO:0005739	NP_071761	Transcription factor B2, mitochondrial
ASHG19A3A005939	139.952	120.492	7.04522	6.99629	coding	NM_139277	KLK7	RefSeq_coding	1927	chr19	-	51479729	51487071		CCAAGCCTGACTCTGCTCTCGAGAGCTCCAGCAGGAGAGGCCCTTCCTCGCCTGGCAGCC	5650	Hs.151254	GO:0008233|GO:0004252|GO:0008236|GO:0008544|GO:0006508|GO:0005576	NP_644806	Kallikrein-related peptidase 7
ASHG19A3A003705	640.13	323.281	9.22789	8.42644	coding	NM_001173454	PDHA1	RefSeq_coding	3504	chrX	+	19362010	19379823		CTCTCACTCTCTTAAAACCAGGCAGGCAAGCAGAGTGCTGGTAGCATCCCGTAATTTTGC	5160	Hs.530331	GO:0016491|GO:0005515|GO:0004739|GO:0006096|GO:0055114|GO:0006090|GO:0010510|GO:0005759|GO:0005739	NP_001166927	Pyruvate dehydrogenase (lipoamide) alpha 1
ASHG19A3A045470	369.558	202.8	8.43871	7.74872	coding	NM_030813	CLPB	RefSeq_coding	3131	chr11	-	72003471	72145568		AGATGGAAAAGGGAAGACCATTGATTGCAAGGACGCCATCTTCATCATGACCTCCAATGT	81570	Hs.523877	GO:0005524|GO:0003674|GO:0017111|GO:0000166|GO:0005515|GO:0034605|GO:0005575|GO:0005739	NP_110440	ClpB caseinolytic peptidase B homolog (E. coli)
ASHG19A3A006212	100.913	84.306	6.58646	6.47206	coding	NM_153246	C6orf223	RefSeq_coding	3595	chr6	+	43968336	43973692		GGAGTGGGCCTGCATTCTGCGGAGGAAGACCCCCAGGCACAAGCAGCCCACCTTACTGAT	221416	Hs.531926		NP_694978	Chromosome 6 open reading frame 223
ASHG19A3A029079	136.369	172.592	7.00878	7.51489	coding	NM_001037333	CYFIP2	RefSeq_coding	6498	chr5	+	156693090	156822604		GCGGGGCAGAGCATCCTGCGCCCCGGCGCGGGGCCCTGCGGTAGCCTCAGGCCCCTCCCC	26999	Hs.519702	GO:0005515|GO:0006915|GO:0016337|GO:0030054|GO:0005737|GO:0048471|GO:0045202|GO:0019717	NP_055191	Cytoplasmic FMR1 interacting protein 2
ASHG19A3A010587	4281.29	3756.01	11.9897	11.9546	coding	NM_001392	DTNA	RefSeq_coding	1763	chr18	+	32073253	32409292	NM_001128175,	GAGATTGGCCTACGGTTTCTGTTTTGAGGGTGCTGTTCAATAAAGCTGTGTACACTAAAT	1837	Hs.643454	GO:0005509|GO:0005515|GO:0008270|GO:0007274|GO:0007165|GO:0006941|GO:0007268|GO:0030054|GO:0005737|GO:0005792|GO:0005886|GO:0045202	NP_116763	Dystrobrevin, alpha
ASHG19A3A011167	1882.76	1225.23	10.7936	10.3465	coding	NM_021241	WIZ	RefSeq_coding	4185	chr19	-	15532318	15560762		TCGCTCTGCAAATGTTTATTGAACATTTCTGAGATTTTAAGAGATTTTGTTGGCTGCTCC	58525	Hs.442138	GO:0046872|GO:0008270|GO:0005622|GO:0005634	NP_067064	Widely interspaced zinc finger motifs
ASHG19A3A052676	131.51	148.004	6.95886	7.29264	coding	NM_001165037	GABRA5	RefSeq_coding	2776	chr15	+	27112272	27194356		GCGGAGGAGAAGGAGGATGCATCCTCACCGACGGCTCGCCTCCCGGGGCCGGCGCGCAGG	2558	Hs.24969	GO:0004890|GO:0005254|GO:0005230|GO:0005216|GO:0004872|GO:0005215|GO:0008306|GO:0001662|GO:0007420|GO:0007214|GO:0034220|GO:0007165|GO:0007268|GO:0055085|GO:0006810|GO:0030054|GO:0034707|GO:0005887|GO:0005886|GO:0045211|GO:0045202	NP_001158509	Gamma-aminobutyric acid (GABA) A receptor, alpha 5
ASHG19A3A052503	501.412	296.686	8.87307	8.30041	coding	NM_032856	WDR73	RefSeq_coding	1855	chr15	-	85186011	85197521		TGCGCCATGGAGGATTTTCAGACAGGTCTATCTTTGATCTAAAGCATGTGCCACATACCA	84942	Hs.728276		NP_116245	WD repeat domain 73
ASHG19A3A005073	190.665	129.842	7.49037	7.10435	coding	NM_018913	PCDHGA10	RefSeq_coding	4617	chr5	+	140792742	140892546		TATAGAGGATACCCCATTGGTTCCACAAGCCCCGCCCAACACGGACTGGCGTTTCTCTCA	5098	Hs.368160	GO:0005509|GO:0016339|GO:0007155|GO:0007156|GO:0016021|GO:0016020|GO:0005886	NP_115779	Protocadherin gamma subfamily C, 3
ASHG19A3A012094	8325.02	9177.03	12.9471	13.2401	coding	NM_015414	RPL36	RefSeq_coding	557	chr19	+	5690345	5691676		CTGGGCCTCGGGAACTGAGCCGGTACTCACCTCCGCCCCTTCTCCCCGTCGCTGTCCGCA	25873	Hs.408018	GO:0005515|GO:0003735|GO:0044267|GO:0031018|GO:0010467|GO:0006412|GO:0006412|GO:0006414|GO:0006415|GO:0019058|GO:0016032|GO:0019083|GO:0005829|GO:0005829|GO:0022625|GO:0005622|GO:0005730|GO:0005840	NP_378669	Ribosomal protein L36
ASHG19A3A033745	733.082	550.265	9.42589	9.2006	coding	NM_000238	KCNH2	RefSeq_coding	3900	chr7	-	150642049	150675014	NM_172057,	GGCACCTCAAGGACTTTTCTGCTATTTACTGCTCTTATTGTTAAGGATAATAATTAAGGA	3757	Hs.647099	GO:0005251|GO:0000155|GO:0005244|GO:0008015|GO:0006811|GO:0006936|GO:0006813|GO:0008016|GO:0006355|GO:0055085|GO:0016021|GO:0016020|GO:0008076	NP_742054	Potassium voltage-gated channel, subfamily H (eag-related), member 2
ASHG19A3A006541	443.905	369.15	8.70167	8.6238	coding	NM_181454	MRPL55	RefSeq_coding	700	chr1	-	228294380	228297013		GGACCAGCCCCAGGCTCCTGTGCTGGCGGTTCTGAGAAGTCCAAGGGTTGCTGGGAGAGG	128308	Hs.63236	GO:0003735|GO:0006412|GO:0005762|GO:0005739|GO:0005840	NP_852130	Mitochondrial ribosomal protein L55
ASHG19A3A040712	713.304	356.244	9.38868	8.56804	coding	NM_005089	ZRSR2	RefSeq_coding	1512	chrX	+	15808573	15841380		AGACTTCTATGAGGATGTGTTGCCCGAGTTCAAGAACGTGGGGAAAGTGATTCAGTTCAA	8233	Hs.171909	GO:0003723|GO:0046872|GO:0000166|GO:0030628|GO:0005515|GO:0008270|GO:0008380|GO:0000398|GO:0000245|GO:0005689|GO:0005634	NP_005080	Zinc finger (CCCH type), RNA-binding motif and serine/arginine rich 2
ASHG19A3A003524	300.716	315.104	8.14706	8.39102	coding	NM_001170717	BCAR1	RefSeq_coding	3311	chr16	-	75262928	75285526		GCCAGGGCCAGGCTGAGGCTGTGGGGTGTCTGGGTCTACGACGTTCCTCCATCGGTGAGC	9564	Hs.479747	GO:0017124|GO:0005515|GO:0019901|GO:0019903|GO:0004871|GO:0050853|GO:0007186|GO:0007186|GO:0050852|GO:0007015|GO:0050851|GO:0007596|GO:0007155|GO:0051301|GO:0016477|GO:0008283|GO:0007173|GO:0008286|GO:0007229|GO:0048011|GO:0048008|GO:0030335|GO:0042981|GO:0001558|GO:0007165|GO:0030054|GO:0005737|GO:0005829|GO:0005829|GO:0005925|GO:0005624|GO:0001726	NP_055382	Breast cancer anti-estrogen resistance 1
ASHG19A3A005679	89.5246	76.705	6.40765	6.34288	coding	NM_018262	IFT122	RefSeq_coding	3837	chr3	+	129158967	129239190	NM_052990,	CAATATGGTCCATCTGCTGGAACCCTTCAAGAGAGGAACGTAATGACATCCTGGCTGTGG	55764	Hs.655284	GO:0048593|GO:0030030|GO:0060271|GO:0010172|GO:0035050|GO:0060173|GO:0007275|GO:0001843|GO:0005929|GO:0005737|GO:0005856|GO:0005932|GO:0032391	NP_443716	Intraflagellar transport 122 homolog (Chlamydomonas)
ASHG19A3A003161	948.526	971.115	9.80278	10.0089	coding	NM_001163335	SYTL5	RefSeq_coding	4821	chrX	+	37865834	37988072		TCCTAAGCCTGTGTTCTATCTTAAGTGTTTTCTGCATTCTCTCCCAGCGGATCTGATTCC	94122	Hs.662334	GO:0017137|GO:0046872|GO:0005515|GO:0008270|GO:0006887|GO:0006886|GO:0016020	NP_620135	Synaptotagmin-like 5
ASHG19A3A019040	1224.34	373.377	10.1726	8.63734	coding	NM_174981	POTED	RefSeq_coding	1826	chr21	+	14982497	15013906	NR_027480,NM_207355,NM_001145442,NM_001137671,NM_001136213,NM_001099771,NM_001083538,NM_001005356,	TTCTCAAGATCTATCTGGACAGACGGCCAGAGAGTATGCTGTTTCTAGTCATCATCATGT	339010	Hs.442712		NP_997238	POTE ankyrin domain family, member B
ASHG19A3A020383	2463.31	4153.46	11.1744	12.094	coding	NM_001135729	TOM1	RefSeq_coding	2326	chr22	+	35695267	35743985		ATTAAATTGCCTCTCAGTCTCAACAGATGACAAACCCCTTGCCCTTGCCTCTGATTTAAG	10043	Hs.474705	GO:0005515|GO:0006897|GO:0016197|GO:0016197|GO:0006886|GO:0015031|GO:0005737|GO:0005829|GO:0005769|GO:0005622|GO:0016020	NP_005479	Target of myb1 (chicken)
ASHG19A3A054213	83.8235	72.486	6.31082	6.25853	coding	NM_020912	FLYWCH1	RefSeq_coding	2555	chr16	+	2961979	2990151	NM_032296,	AAGCCAGCGCCGTGACCCAGGTGTGGGGGATGATGGTGACGCTTCTCACTCACGTGTGAA	84256	Hs.655321	GO:0003677|GO:0046872|GO:0005634	NP_115672	FLYWCH-type zinc finger 1
ASHG19A3A034185	263.145	341.217	7.95724	8.50372	coding	NM_207172	NPSR1	RefSeq_coding	1567	chr7	+	34697896	34889590		TAATGACTGCATGCACTGCTTAAGTATTGGCCAACACGAACTCCCCAGTTATTCATGCCA	387129	Hs.652373	GO:0004930|GO:0004872|GO:0005000|GO:0005737|GO:0016021|GO:0005886|GO:0005886|GO:0005886	NP_997056	Neuropeptide S receptor 1
ASHG19A3A036774	2132.67	2418.72	10.9665	11.3276	coding	NM_017864	INTS8	RefSeq_coding	3393	chr8	+	95835533	95892720		AATTGTTCAAAGTAGTTTTCCAGTCAAACAGGCAAAACCCGGACCCCCTCAGTTAAGTGT	55656	Hs.727669	GO:0005515|GO:0016180|GO:0032039|GO:0005634	NP_060334	Integrator complex subunit 8
ASHG19A3A004362	124.721	118.964	6.88362	6.97641	coding	NM_005046	KLK7	RefSeq_coding	1927	chr19	-	51479729	51487150		ACTTGGATCACATCAGATCCTCTCGAGCTCCAGCAGGAGAGGCCCTTCCTCGCCTGGCAG	5650	Hs.151254	GO:0008233|GO:0004252|GO:0008236|GO:0008544|GO:0006508|GO:0005576	NP_644806	Kallikrein-related peptidase 7
ASHG19A3A018938	650.788	647.709	9.25412	9.43007	coding	NM_000071	CBS	RefSeq_coding	2609	chr21	-	44473300	44496040		GTCTCCGCCTCGCCGCAGTCGGGGCAGCCGCTCGCCCCTCTTTTCCATGTATCCGTCCAG	875	Hs.533013	GO:0004122|GO:0019899|GO:0020037|GO:0020037|GO:0042802|GO:0016829|GO:0046872|GO:0005515|GO:0042803|GO:0030170|GO:0031625|GO:0019448|GO:0006565|GO:0006563|GO:0008652|GO:0006535|GO:0019343|GO:0001958|GO:0043418|GO:0050667|GO:0070814|GO:0043506|GO:0051593|GO:0031667|GO:0019346|GO:0005737|GO:0005829|GO:0043231|GO:0005730|GO:0005634|GO:0005625	NP_001171480	Cystathionine-beta-synthase
ASHG19A3A054946	29236.5	28298.9	14.7777	14.846	coding	NM_017702	DEF8	RefSeq_coding	921	chr16	+	90015150	90025773		CGTTGTACTGTCTACATTGGACAGGGCTGTTCTGGATGAGAAATTAAACTAGTGAATTAC	54849	Hs.62771	GO:0046872|GO:0008270|GO:0035556	NP_997397	Differentially expressed in FDCP 8 homolog (mouse)
ASHG19A3A044118	189.375	176.175	7.48044	7.54772	coding	NM_173540	FUT11	RefSeq_coding	2069	chr10	+	75532048	75535974		ATGAAATACCTGGCATACAAGCAACCTGGGGGCATCACCAACCAATTTCTTCTGGATAGT	170384	Hs.588854	GO:0046920|GO:0016757|GO:0006486|GO:0005794|GO:0032580|GO:0016021|GO:0016020	NP_775811	Fucosyltransferase 11 (alpha (1,3) fucosyltransferase)
ASHG19A3A003537	77.3334	72.1643	6.19251	6.25252	coding	NM_001170782	FAM122C	RefSeq_coding	1947	chrX	+	133941204	133957005		AACATTTAGGAATCGACGCTCTCTGGAATTCTGGCACTTCTGCTCAAGCCGGATGTCACT	159091	Hs.269127		NP_620174	Family with sequence similarity 122C
ASHG19A3A050155	551.224	363.882	9.01092	8.60371	coding	NM_015116	LRCH1	RefSeq_coding	5490	chr13	+	47127295	47319034	NM_001164211,	GGTGTTTTGCCTTTGCCTGTGGGGAAAAAGTAGGGATGATATTTTAAAATTTTAAGAAAC	23143	Hs.507971		NP_055931	Leucine-rich repeats and calponin homology (CH) domain containing 1
ASHG19A3A023258	682.719	599.346	9.32447	9.31945	coding	NM_181897	PPP2R3A	RefSeq_coding	4664	chr3	+	135741581	135866733		TGTGATTTTGTTCTCCCTTCACGGTTTAAGAAGCGGCTGAAGTCATTTCAGCAGACACAG	5523	Hs.518155	GO:0005509|GO:0005515|GO:0008601|GO:0006470|GO:0000159|GO:0000159	NP_871626	Protein phosphatase 2, regulatory subunit B'', alpha
ASHG19A3A010534	363.578	407.064	8.41722	8.76396	coding	NM_001100619	CABLES1	RefSeq_coding	5024	chr18	+	20715726	20840434		TCAGGGAATCCTGCCCATCGCCTTCTCCAGGCCGACTTCGCAGAACTACTGCTCCCTGGA	91768	Hs.11108	GO:0016538|GO:0005515|GO:0007596|GO:0007399|GO:0051726|GO:0051302|GO:0005737|GO:0005829|GO:0005634	NP_612384	Cdk5 and Abl enzyme substrate 1
ASHG19A3A035117	345.991	166.79	8.34219	7.46664	coding	NM_015135	NUP205	RefSeq_coding	6286	chr7	+	135242661	135333489		ATTACAGCGAGAAAACATAGCCATTATTGAAAGTTATGGCGCCGCCCTCATGGAAGTGGT	23165	Hs.727517	GO:0005515|GO:0005975|GO:0015758|GO:0008645|GO:0051028|GO:0006913|GO:0000059|GO:0015031|GO:0010827|GO:0055085|GO:0016032|GO:0005635|GO:0005635|GO:0005643|GO:0005634	NP_055950	Nucleoporin 205kDa
ASHG19A3A012649	1050.34	1003.3	9.95429	10.0544	coding	NM_001001716	NFKBIB	RefSeq_coding	2213	chr19	+	39390614	39399533		AACTCTGGAGTGGCGGCTGGCTAGAAATTGGTCTGTAGAAATGACCTTGAAAATGGAGTT	4793	Hs.9731	GO:0005515|GO:0004871|GO:0003713|GO:0002755|GO:0002755|GO:0002756|GO:0002756|GO:0008063|GO:0007253|GO:0045087|GO:0051092|GO:0007165|GO:0034130|GO:0034134|GO:0034138|GO:0034142|GO:0002224|GO:0005737|GO:0005829|GO:0005634	NP_002494	Nuclear factor of kappa light polypeptide gene enhancer in B-cells inhibitor, beta
ASHG19A3A002923	62.539	107.726	5.8864	6.83052	coding	NM_001146158	MOGS	RefSeq_coding	2584	chr2	-	74688184	74692537		AGGGCGAGAGGCGGGAGCCGGAGAGCCCCGCCGTGGCCCCGGACCTCTTCTGGGGAACCT	7841	Hs.516119	GO:0015926|GO:0016798|GO:0004573|GO:0044267|GO:0009311|GO:0043687|GO:0006487|GO:0018279|GO:0006457|GO:0005783|GO:0005789|GO:0016021|GO:0016020|GO:0005624	NP_006293	Mannosyl-oligosaccharide glucosidase
ASHG19A3A024155	5638.18	9353.47	12.3779	13.2634	coding	NM_001924	GADD45A	RefSeq_coding	1355	chr1	+	68150882	68154019		CATAGTTTGGGTATTTTTGGTTTATATGCCCTCAAGTAAAAGAAAAGCCGAAAGGGTTAA	1647	Hs.80409	GO:0005515|GO:0006281|GO:0000086|GO:0006915|GO:0007050|GO:0071479|GO:0071260|GO:0007098|GO:0006469|GO:0000079|GO:0042770|GO:0005634	NP_001915	Growth arrest and DNA-damage-inducible, alpha
ASHG19A3A004926	402.396	474.991	8.56216	8.98663	coding	NM_016826	OGG1	RefSeq_coding	1957	chr3	+	9791627	9808352		AGGCCCTCTGCATCCTGCCTGGAGTGGGCACCAAGGGCCTCCTTGGCAATGCATTTGATG	4968	Hs.380271	GO:0003684|GO:0004519|GO:0016798|GO:0016829|GO:0008534|GO:0005515|GO:0006281|GO:0006284|GO:0006285|GO:0045007|GO:0045007|GO:0006289|GO:0033158|GO:0006979|GO:0009314|GO:0005737|GO:0005739|GO:0016363|GO:0016607|GO:0005730|GO:0005654|GO:0005654|GO:0005654|GO:0005634	NP_058438	8-oxoguanine DNA glycosylase
ASHG19A3A027371	803.228	928.745	9.56279	9.94166	coding	NM_020141	TMEM167B	RefSeq_coding	2768	chr1	+	109633402	109639553		TACTTCAAGAAAGTACCTCGTCTCAAAACCTGGCTGCTATCAGAGAAGAAGGGTGTTTGG	56900	Hs.82933	GO:0005794|GO:0000139|GO:0016021|GO:0016020	NP_064526	Transmembrane protein 167B
ASHG19A3A015434	129.594	132.552	6.93785	7.13261	coding	NM_006488	KHK	RefSeq_coding	2433	chr2	+	27309610	27323619		CAGCTCCTGCTGCATCATCAACAACTCCAATGGCAACCGTACCATTGTGCTCCATGACAC	3795	Hs.567297	GO:0005524|GO:0004454|GO:0016301|GO:0000166|GO:0005515|GO:0016740|GO:0005975|GO:0006001|GO:0009750|GO:0009749|GO:0032868|GO:0009744|GO:0010043|GO:0005737|GO:0005829	NP_006479	Ketohexokinase (fructokinase)
ASHG19A3A044510	277.497	280.827	8.03222	8.2204	coding	NM_004132	HABP2	RefSeq_coding	3019	chr10	+	115312777	115349358		CATTTTTCCCCCCTAAAGGCATAGACAACAAAAGAAATTTTATTGAGAGGAAAACACAAG	3026	Hs.422542	GO:0005539|GO:0008233|GO:0004252|GO:0007155|GO:0006508|GO:0005576|GO:0005615	NP_004123	Hyaluronan binding protein 2
ASHG19A3A004726	176.838	240.401	7.38205	7.99084	coding	NM_014336	AIPL1	RefSeq_coding	2981	chr17	-	6327059	6338519		GGCCGAGTTCTGGTGCGACACCATCCACACGGGGGTCTACCCCATCCTATCCCGGAGCCT	23746	Hs.279887	GO:0005488|GO:0001918|GO:0051082|GO:0018343|GO:0006457|GO:0050896|GO:0007601|GO:0005737|GO:0005634	NP_055151	Aryl hydrocarbon receptor interacting protein-like 1
ASHG19A3A036536	96.632	644.631	6.52368	9.42462	coding	NM_001003791	ERLIN2	RefSeq_coding	1538	chr8	+	37594096	37604070	NM_001003790,	CACTGAAGCAGTGTGACATAAAATAATACCTATGTATACAACACTCCTCTGTAAATAGCA	11160	Hs.705490	GO:0005515|GO:0030433|GO:0005737|GO:0005783|GO:0005789|GO:0016021|GO:0005886	NP_009106	ER lipid raft associated 2
ASHG19A3A034575	7168.93	8125.58	12.7299	13.0594	coding	NM_152902	TIPRL	RefSeq_coding	3032	chr1	+	168148170	168171349		TTTTTCTTGAGAATTGATGGGGTGCTTATCAGAATGAATGACACGAGACTTTACCATGAG	261726	Hs.209431	GO:0005515|GO:0000077|GO:0034048|GO:0005737	NP_690866	TIP41, TOR signaling pathway regulator-like (S. cerevisiae)
ASHG19A3A025895	159.786	135.928	7.2393	7.16772	coding	NM_018983	GAR1	RefSeq_coding	1280	chr4	+	110736665	110745891		TATTCAAGTTTCTGGTCTTTAAAAAACTCTGTGGCGGTACGGTAACCGAGGAGGTTCCAG	54433	Hs.69851	GO:0005261|GO:0009982|GO:0030515|GO:0006364|GO:0015030|GO:0031429|GO:0005730|GO:0005634|GO:0030529	NP_127460	GAR1 ribonucleoprotein homolog (yeast)
ASHG19A3A001294	163.392	187.647	7.2696	7.63383	coding	NM_001039547	GK5	RefSeq_coding	9855	chr3	-	141876368	141944449		TATTTGGTGTGCCTATACCAATAGTTGCCTTGGTTGCTGACCAGCAATCAGCCATGTTTG	256356	Hs.135904	GO:0005524|GO:0004370|GO:0000166|GO:0016740|GO:0005975|GO:0006071	NP_001034636	Glycerol kinase 5 (putative)
ASHG19A3A021223	146.381	148.803	7.11041	7.3011	coding	NM_198859	PRICKLE2	RefSeq_coding	8322	chr3	-	64079526	64211131		TGTTGCCACTGCTTCGAGTCCTTGTATGCAGAATATTGTGACACCTGTGCCCAACATATA	166336	Hs.728852	GO:0046872|GO:0008270|GO:0045197|GO:0031175|GO:0016327|GO:0005737|GO:0016328|GO:0016020|GO:0031965|GO:0005634	NP_942559	Prickle homolog 2 (Drosophila)
ASHG19A3A043405	1993.8	2149.34	10.8697	11.1609	coding	NM_212554	METTL10	RefSeq_coding	2638	chr10	-	126447405	126480439		CCACTGGATGCTTCAGTGCTTGATATTGGAACTGGAAATGGTGTTTTCCTGGTTGAACTT	399818	Hs.468488	GO:0008168|GO:0016740|GO:0008152	NP_997719	Methyltransferase like 10
ASHG19A3A010924	3892.45	2909.64	11.8505	11.5874	coding	NM_175614	NDUFA11	RefSeq_coding	819	chr19	-	5894685	5904025		TACTGGGATATCCCCGATGGCACCGATTGCCACCGCAAAGCCTACAGCACCACCAGTATT	126328	Hs.406062	GO:0008565|GO:0022904|GO:0016021|GO:0016020|GO:0005743|GO:0005747|GO:0005739|GO:0070469	NP_783313	NADH dehydrogenase (ubiquinone) 1 alpha subcomplex, 11, 14.7kDa
ASHG19A3A005560	183.554	188.164	7.43765	7.63772	coding	NM_032951	MLXIPL	RefSeq_coding	3288	chr7	-	73007523	73038870		ACTCAGTGCCCAGCCCAGCCTCAAGGTGAGCAAAGCTACCACGCTGCAGAAGACAGCTGA	51085	Hs.647055	GO:0003677|GO:0003677|GO:0035538|GO:0046982|GO:0042803|GO:0003700|GO:0016563|GO:0008134|GO:0016564|GO:0009653|GO:0006112|GO:0042593|GO:0010255|GO:0007243|GO:0071157|GO:0090324|GO:0033137|GO:0000122|GO:0045892|GO:0008284|GO:0031325|GO:0045723|GO:0010552|GO:0045821|GO:0046889|GO:0045893|GO:0042304|GO:0006355|GO:0006351|GO:0070328|GO:0005737|GO:0005829|GO:0005654|GO:0005634|GO:0005634|GO:0005667	NP_116572	MLX interacting protein-like
ASHG19A3A015142	1312.24	1025.87	10.2683	10.0871	coding	NM_005737	ARL4C	RefSeq_coding	4024	chr2	-	235401687	235405693		CATCATCCTTCTCTTTTGTTTCCATAGCCTTTTATAATGCATATATGATGCTGTGAACAG	10123	Hs.111554	GO:0005525|GO:0003924|GO:0043014|GO:0000166|GO:0005515|GO:0006184|GO:0032456|GO:0007264|GO:0006810|GO:0005737|GO:0030175|GO:0005622|GO:0005634|GO:0005886	NP_005728	ADP-ribosylation factor-like 4C
ASHG19A3A017785	173.331	240.596	7.35321	7.99192	coding	NM_001032288	UBE2V1	RefSeq_coding	2138	chr20	-	48697662	48729710		TGAAGAAGGGGCCGGCCTTCAAGCAAGAGCGACGCAAGATGGCAGCCACCACGGGCTCGG	7335	Hs.727525	GO:0016881|GO:0005515|GO:0016563|GO:0002755|GO:0002755|GO:0050852|GO:0008063|GO:0030154|GO:0045087|GO:0043123|GO:0043123|GO:0051092|GO:0043687|GO:0000209|GO:0006282|GO:0006355|GO:0034130|GO:0034134|GO:0034142|GO:0002224|GO:0005737|GO:0005829|GO:0005829|GO:0005634|GO:0031371	NP_954595	Ubiquitin-conjugating enzyme E2 variant 1
ASHG19A3A032400	24163.2	18285.7	14.4832	14.2407	coding	NM_152743	C7orf27	RefSeq_coding	2713	chr7	-	2577510	2595146		GGAGAGAAGCAAGGTCAAGAAATCCCACAGTTTGATGTATTAAAGAAATGACTTATTTCT	221927	Hs.520623	GO:0005515|GO:0010212|GO:0005634	NP_689956	Chromosome 7 open reading frame 27
ASHG19A3A045285	115.875	91.5813	6.77965	6.58778	coding	NM_001081491	NXF1	RefSeq_coding	4147	chr11	-	62559597	62572964		TATTTGCTCCTAGAGCAGCCCAGGAGGCACGGTGGCTCTGAAGCATCACTCACTTCTGTC	10482	Hs.523739	GO:0003729|GO:0005487|GO:0000166|GO:0005515|GO:0010467|GO:0044419|GO:0006406|GO:0006406|GO:0016973|GO:0006810|GO:0005737|GO:0005829|GO:0005622|GO:0042405|GO:0005643|GO:0016607|GO:0005654|GO:0005634	NP_006353	Nuclear RNA export factor 1
ASHG19A3A006266	57025.7	59504.5	15.7796	15.8871	coding	NM_170679	SKP1	RefSeq_coding	2028	chr5	-	133492083	133512724		CTTTACTGAAGAGGAGGAAGCCCAGGTACGCAAAGAGAACCAGTGGTGTGAAGAGAAGTG	6500	Hs.171626	GO:0005515|GO:0004842|GO:0000082|GO:0000084|GO:0031146|GO:0031145|GO:0000278|GO:0051437|GO:0016567|GO:0051439|GO:0006511|GO:0016032|GO:0019005|GO:0005829|GO:0005829|GO:0005654|GO:0005654	NP_733779	S-phase kinase-associated protein 1
ASHG19A3A021078	107.084	95.2917	6.67131	6.6464	coding	NM_153273	IP6K1	RefSeq_coding	4468	chr3	-	49761727	49823973		AATAGAATCTGACCATTGGCTTTCACCTGGCCAGGACCTTCTATGTAGCTCTCCTTTTGT	9807	Hs.386168	GO:0005524|GO:0000832|GO:0004428|GO:0008440|GO:0000166|GO:0016740|GO:0046854|GO:0005737|GO:0005634	NP_695005	Inositol hexakisphosphate kinase 1
ASHG19A3A043544	2389.95	416.802	11.1337	8.7974	coding	NM_003739	AKR1C3	RefSeq_coding	1224	chr10	+	5136567	5149876	DQ269985,	TCACCAACAGATGAAAATGGAAAAGTAATATTTGACATAGTGGATCTCTGTACCACCTGG	8644	Hs.78183	GO:0004033|GO:0047026|GO:0047718|GO:0016491|GO:0047017|GO:0047045|GO:0050327|GO:0047115|GO:0055114|GO:0006693|GO:0005737|GO:0005622	NP_003730	Aldo-keto reductase family 1, member C3 (3-alpha hydroxysteroid dehydrogenase, type II)
ASHG19A3A021131	261.731	114.513	7.94931	6.91849	coding	NM_015426	POC1A	RefSeq_coding	2213	chr3	-	52109249	52188706	NM_001161581,	CCCCAGACACTGACTAGCACGCTGGAGCACATTGTGGGCCAGCTGGATGTCCTCACTCAG	25886	Hs.476306	GO:0042995|GO:0005814|GO:0005737|GO:0005856|GO:0005932	NP_056241	POC1 centriolar protein homolog A (Chlamydomonas)
ASHG19A3A039119	906.095	809.912	9.73499	9.74962	coding	NM_032303	HSDL2	RefSeq_coding	3210	chr9	+	115142350	115234684		TTGTTATTGCTGCAAAGACCGCCCAGCCACATCCAAAACTTCTAGGCACAATCTATACTG	84263	Hs.59486	GO:0005488|GO:0016491|GO:0032934|GO:0055114|GO:0005777	NP_115679	Hydroxysteroid dehydrogenase like 2
ASHG19A3A046720	260.59	90.664	7.94149	6.57147	coding	NM_016729	FOLR1	RefSeq_coding	982	chr11	+	71903172	71907366	NM_016725,NM_016724,NM_000802,	GCCTCTGACAGCCACTTTGAATAAACCAGACACCGCACATGTGTCTTGAGAATTATTTGG	2348	Hs.73769	GO:0005542|GO:0004872|GO:0008219|GO:0015884|GO:0006898|GO:0031225|GO:0005576|GO:0005887|GO:0005624|GO:0005886	NP_057941	Folate receptor 1 (adult)
ASHG19A3A005543	3261.36	1887.56	11.5907	10.9741	coding	NM_032796	SYAP1	RefSeq_coding	3533	chrX	+	16737706	16780806		CTCCACCAGGCCAAAGACTTCGGCAACTATTTATTTAACTTTGCATCTGCTGCCACAAAA	94056	Hs.729197	GO:0005634	NP_116185	Synapse associated protein 1
ASHG19A3A006911	1480.8	1192.26	10.445	10.3075	coding	NM_201440	PPHLN1	RefSeq_coding	1555	chr12	+	42719946	42835764	NM_201438,NM_001143789,NM_001143787,	AGCACCTCCTCGAAGTCATCCCAGTGATGAATCTGGTTATAGATGGACAAGAGACGATCA	51535	Hs.444157	GO:0031424|GO:0005737|GO:0005634	NP_958923	Periphilin 1
ASHG19A3A024804	75.3001	88.975	6.1557	6.54604	coding	NM_198682	GYPE	RefSeq_coding	1783	chr4	-	144792019	144826716		GTCCCTCTCTGTGGAAGAATACTGAATAGAAGAGAGAAATCACTCAATATGTGGAATGAC	2994	Hs.654368	GO:0005887|GO:0005886	NP_002091	Glycophorin B (MNS blood group)
ASHG19A3A015403	290.112	228.623	8.09695	7.91854	coding	NM_024322	CENPO	RefSeq_coding	1665	chr2	+	25016332	25042784		AAACCCACTGTGTAACTTGCTGTCATTTACTTACAAACTGGATCCAGGGGGTCAGTCCTT	79172	Hs.467898	GO:0005515|GO:0034080|GO:0000087|GO:0051301|GO:0007059|GO:0000278|GO:0000236|GO:0006334|GO:0000777|GO:0005829|GO:0005654|GO:0005634	NP_077298	Centromere protein O
ASHG19A3A017601	1940.57	1703.29	10.8333	10.8195	coding	NM_002212	EIF6	RefSeq_coding	1114	chr20	-	33866724	33872594	NM_181468,	TACCACCGACCAGGAGCTGCAACACATTCGCAACAGCCTCCCAGACACAGTGCAGATTAG	3692	Hs.654848	GO:0005515|GO:0043022|GO:0003743|GO:0042256|GO:0005737|GO:0005730|GO:0005634	NP_852133	Eukaryotic translation initiation factor 6
ASHG19A3A054782	159.107	83.3673	7.23352	6.45511	coding	NM_020995	HPR	RefSeq_coding	1245	chr16	+	72097124	72111144	NM_005143,NM_001126102,	GTTTGAAGCTGATGGGTGCCAGCCCTGCATTGCTGAGTCAATCAATAAAGAGCTTTCTTT	3250	Hs.655361	GO:0003824|GO:0030492|GO:0004252|GO:0006508|GO:0005576|GO:0034366	NP_066275	Haptoglobin-related protein
ASHG19A3A043256	768.915	609.178	9.49905	9.34114	coding	NM_001011663	PCGF6	RefSeq_coding	2248	chr10	-	105062553	105110891	ENST00000443755,	AGAATCAGTGTTTCGTATTCCACCTGAACTTGATATGTCTTTATTACTGGAGTTCATTGG	84108	Hs.335808	GO:0003677|GO:0046872|GO:0003700|GO:0008270|GO:0006351|GO:0031519|GO:0005634	NP_115530	Polycomb group ring finger 6
ASHG19A3A006773	695.673	809.816	9.35372	9.74952	coding	NM_198291	SRC	RefSeq_coding	4044	chr20	+	35974556	36033819		TGAGCCCGCCCGCCCGCCGGCCCAGAACAGAGAACAGAAGCTCAGAGAAGTGAAGCAACT	6714	Hs.195659	GO:0005524|GO:0042169|GO:0005070|GO:0050839|GO:0020037|GO:0005158|GO:0005178|GO:0016301|GO:0004715|GO:0000166|GO:0008022|GO:0005515|GO:0005080|GO:0004672|GO:0004672|GO:0004713|GO:0004713|GO:0005102|GO:0016740|GO:0007265|GO:0031295|GO:0007411|GO:0007596|GO:0045453|GO:0060444|GO:0034329|GO:0008283|GO:0016337|GO:0016044|GO:0071398|GO:0071456|GO:0032869|GO:0071222|GO:0071445|GO:0007173|GO:0008543|GO:…	NP_938033	V-src sarcoma (Schmidt-Ruppin A-2) viral oncogene homolog (avian)
ASHG19A3A012225	71.6804	78.176	6.08379	6.36868	coding	NM_000527	LDLR	RefSeq_coding	5265	chr19	+	11200056	11244503		AGTATTTTGGACAGATATCATCAACGAAGCCATTTTCAGTGCCAACCGCCTCACAGGTTC	3949	Hs.728190	GO:0005509|GO:0005041|GO:0005515|GO:0004872|GO:0030229|GO:0007568|GO:0042632|GO:0008203|GO:0030301|GO:0006897|GO:0044419|GO:0030299|GO:0006629|GO:0006869|GO:0042159|GO:0042157|GO:0034383|GO:0006898|GO:0032355|GO:0033762|GO:0009725|GO:0008202|GO:0006810|GO:0005901|GO:0030669|GO:0030669|GO:0005905|GO:0005769|GO:0010008|GO:0010008|GO:0009897|GO:0005887|GO:0034362|GO:0005764|GO:0005886|GO:0005886	NP_001182732	Low density lipoprotein receptor
ASHG19A3A035399	232.794	142.05	7.7767	7.23043	coding	NM_030936	RNF32	RefSeq_coding	1757	chr7	+	156433400	156469818		TCAGCAGTTGGAAGAAAAATGTGGCCATGAGATCACAGAAGAGGAATGGGAGAAAATCCA	140545	Hs.446194	GO:0046872|GO:0005515|GO:0008270|GO:0016235|GO:0005737|GO:0005768	NP_112198	Ring finger protein 32
ASHG19A3A014781	9331.82	24555.2	13.1172	14.6525	coding	NM_139266	STAT1	RefSeq_coding	2798	chr2	-	191840262	191878976		CAGCTGAACTTGTTGAGATCCCCGTGTTACTGCCTATCAGCATTTTACTACTTTAAAAAA	6772	Hs.642990	GO:0003677|GO:0005509|GO:0005515|GO:0043565|GO:0003700|GO:0004871|GO:0007249|GO:0007259|GO:0006919|GO:0008015|GO:0032869|GO:0019221|GO:0006917|GO:0060333|GO:0044419|GO:0031663|GO:0048661|GO:0060334|GO:0006355|GO:0060338|GO:0009617|GO:0051591|GO:0034097|GO:0042493|GO:0043330|GO:0042542|GO:0032496|GO:0009612|GO:0007584|GO:0014070|GO:0043434|GO:0009615|GO:0007165|GO:0006366|GO:0060337|GO:0007260|GO:…	NP_644671	Signal transducer and activator of transcription 1, 91kDa
ASHG19A3A006942	4737.67	4761.84	12.1356	12.2965	coding	NM_201995	SF1	RefSeq_coding	3154	chr11	-	64532075	64546316		CACCGCCTGGTTCCGCCGGCATGATGATCCCTCCCCGCGGCGGCGATGGCCCGAGCCATG	7536	Hs.502829	GO:0003723|GO:0003702|GO:0046872|GO:0003676|GO:0005515|GO:0003714|GO:0008270|GO:0008380|GO:0000389|GO:0000398|GO:0000245|GO:0005730|GO:0005634|GO:0005634|GO:0005840|GO:0005681	NP_973727	Splicing factor 1
ASHG19A3A017594	1493.85	1708.37	10.4583	10.827	coding	NM_178026	GGT7	RefSeq_coding	2640	chr20	-	33432523	33460661		GTGGGCACCAGCTCAGGGGCTTCCATTTGCAAAGGGAAATTAAAGAAAGAATGTTGCTTA	2686	Hs.433738	GO:0008415|GO:0003840|GO:0016740|GO:0006750|GO:0016021|GO:0016020	NP_821158	Gamma-glutamyltransferase 7
ASHG19A3A052488	2222.15	1796.57	11.0248	10.9016	coding	NM_025238	BTBD1	RefSeq_coding	3308	chr15	-	83685182	83736106		GTTGGATTTGGCTTGTATGGATCTATTCATGGCCCTACAGATTATCAAGTGAATATACAG	53339	Hs.459149	GO:0005515|GO:0008150|GO:0005737|GO:0000932|GO:0043234	NP_079514	BTB (POZ) domain containing 1
ASHG19A3A049676	1162.44	3376.52	10.0997	11.7963	coding	NM_138444	KCTD12	RefSeq_coding	6255	chr13	-	77454303	77460540		ACTAGCTACTGTTTTCCTTCCTGTGTGTGAAGTAATGAATCATTGATTATGTGACTTGTT	115207	Hs.644125	GO:0005515|GO:0005249|GO:0006813|GO:0030054|GO:0005886|GO:0045211|GO:0042734|GO:0045202|GO:0008076	NP_612453	Potassium channel tetramerisation domain containing 12
ASHG19A3A051802	24189	21709.3	14.484	14.4843	coding	NM_178587	PPP2R5C	RefSeq_coding	1623	chr14	+	102276139	102378960		GGGGGGTCTCGATTTCACTAACGTTGTATATGAAAATGTCTGCAATAAAAAGTACTTTTA	5527	Hs.368264	GO:0005515|GO:0008601|GO:0008601|GO:0006977|GO:0042771|GO:0008285|GO:0043161|GO:0007165|GO:0000775|GO:0005634|GO:0000159|GO:0000159	NP_848702	Protein phosphatase 2, regulatory subunit B', gamma
ASHG19A3A030386	224.12	175.921	7.72395	7.54548	coding	NM_002912	REV3L	RefSeq_coding	10719	chr6	-	111620234	111804414		TGTGATTGCATATAACTACTGCTTTTCCACCTGCCTTGGCCATGTGGAGAACTTGGGAAA	5980	Hs.232021	GO:0003677|GO:0003887|GO:0046872|GO:0000166|GO:0016779|GO:0016740|GO:0006281|GO:0006261|GO:0006139|GO:0019985|GO:0005634|GO:0016035	NP_002903	REV3-like, catalytic subunit of DNA polymerase zeta (yeast)
ASHG19A3A052504	17164.1	18524.5	13.9966	14.2594	coding	NM_021077	NMB	RefSeq_coding	1046	chr15	-	85198361	85201802		TCCTGCTGTATTTCCTGCTTCCCTGTTGAATTGGTGAATAAAACCTTGCTCTTTACATAC	4828	Hs.386470	GO:0005179|GO:0007267|GO:0007218|GO:0007165|GO:0005576|GO:0005576|GO:0005625	NP_995580	Neuromedin B
ASHG19A3A002818	171.424	186.856	7.33768	7.62825	coding	NM_001145404	ZNF506	RefSeq_coding	3245	chr19	-	19903519	19932560		GAACTACAGAAACCTGATCTTCCTTGTTATGTATTCTCATTTTGCCCAAGACCTTTGGTC	440515	Hs.351906	GO:0003677|GO:0046872|GO:0008270|GO:0006355|GO:0005622|GO:0005730|GO:0005634	NP_001138876	Zinc finger protein 506
ASHG19A3A041475	91.4166	111.25	6.43977	6.87622	coding	NM_001137554	MCTS1	RefSeq_coding	9617	chrX	+	119738551	119755011		ATTCCTTGGGAACCTACTAGTGGGTTTGCCTTCCAGATTTGGTAGACGCAAAAAGCAAAG	28985	Hs.102696	GO:0003723|GO:0007049|GO:0008284|GO:0040008|GO:0006974|GO:0005737	NP_054779	Malignant T cell amplified sequence 1
ASHG19A3A003075	436.114	705.94	8.67633	9.55128	coding	NM_001160418	ZBP1	RefSeq_coding	2102	chr20	-	56178903	56195632		GCTCCTGCTGACCCGGGCAGAGAAGCCGAGAGGCCCCAGCAACATGCAGCTACAATTCCA	81030	Hs.302123	GO:0003677|GO:0003723|GO:0003726|GO:0003692|GO:0008150|GO:0005575	NP_110403	Z-DNA binding protein 1
ASHG19A3A008778	5727.61	5297.5	12.4021	12.4547	coding	NM_005717	ARPC5	RefSeq_coding	2000	chr1	-	183595332	183604985		AAAGGATTTGAGAGCCCGTCTGACAATAGCAGTGCTATGTTACTGCAATGGCATGAAAAG	10092	Hs.518609	GO:0003779|GO:0005515|GO:0005200|GO:0030036|GO:0006928|GO:0030833|GO:0005885|GO:0015629|GO:0042995|GO:0005737	NP_005708	Actin related protein 2/3 complex, subunit 5, 16kDa
ASHG19A3A015531	273.108	358.455	8.01056	8.5787	coding	NM_001170791	FAM82A1	RefSeq_coding	1858	chr2	+	38152461	38244884		GCGCCAGCAGGTCCTGGTCTCCGCTCTCCAACAGCTGAAAGGCCGGCGCAGTGAACACAG	151393	Hs.591566	GO:0005488|GO:0005737|GO:0005856|GO:0016021|GO:0016020|GO:0005874|GO:0000922	NP_653314	Family with sequence similarity 82, member A1
ASHG19A3A001573	173.88	199.173	7.35816	7.72185	coding	NM_001080124	CASP8	RefSeq_coding	2750	chr2	+	202098165	202152434	NM_033355,	TGCCTGTACCCCGCCAACAGCTTCAGAAGAAGGAGCAGCCCCTGGGTGCGTCCACTTTCT	841	Hs.599762	GO:0004197|GO:0008234|GO:0042802|GO:0008233|GO:0005515|GO:0006919|GO:0008633|GO:0008633|GO:0006915|GO:0006915|GO:0006921|GO:0071260|GO:0008624|GO:0008624|GO:0008624|GO:0008629|GO:0043123|GO:0006508|GO:0051603|GO:0042981|GO:0034612|GO:0005813|GO:0005737|GO:0005856|GO:0005829|GO:0005829|GO:0031264|GO:0005741|GO:0005739|GO:0005730|GO:0005634	NP_203522	Caspase 8, apoptosis-related cysteine peptidase
ASHG19A3A012705	105.099	105.269	6.64372	6.79491	coding	NM_000766	CYP2A13	RefSeq_coding	1747	chr19	+	41594367	41602098	NM_000762,	ACTTCCTGGATAAGAAGGGGCAGTTTAAGAAGAGTGATGCTTTTGTGCCCTTTTCCATCG	1553	Hs.567252	GO:0070330|GO:0008389|GO:0009055|GO:0020037|GO:0046872|GO:0055114|GO:0006805|GO:0005783|GO:0005789|GO:0016020|GO:0005792	NP_000757	Cytochrome P450, family 2, subfamily A, polypeptide 13
ASHG19A3A034712	904.346	681.648	9.7323	9.50096	coding	NM_017667	CCDC132	RefSeq_coding	3625	chr7	+	92861652	92988337		ACATCTGGATGCTGTGATGCCTGCAGTCAAAAAGCCCTTTCTTCAGCAGTTCTATTCTCA	55610	Hs.222282		NP_078829	Coiled-coil domain containing 132
ASHG19A3A018049	11301.3	13734.5	13.3935	13.8197	coding	NM_005839	SRRM1	RefSeq_coding	3952	chr1	+	24969593	24999771		TATACAACTTTCAGAGCCTCTTGTATTTGGAAGGCTGGAAGGGCCCAGACTTTGGAATAG	10250	Hs.18192	GO:0003677|GO:0003723|GO:0005515|GO:0008380|GO:0000375|GO:0010467|GO:0031124|GO:0006406|GO:0000398|GO:0000398|GO:0006369|GO:0006366|GO:0071013|GO:0005829|GO:0016363|GO:0016607|GO:0005654|GO:0005634	NP_005830	Serine/arginine repetitive matrix 1
ASHG19A3A012910	61377.5	46240.8	15.8809	15.5308	coding	NM_017432	PTOV1	RefSeq_coding	1884	chr19	+	50354415	50363999		GGCCTCCAAGGACGGTCCCCACCCCTCTACGTTTCCCCAATAAAGCCTTTTAAAAACCTG	53635	Hs.587979	GO:0005737|GO:0005634|GO:0048471|GO:0005886	NP_059128	Prostate tumor overexpressed 1
ASHG19A3A026249	311.749	225.737	8.19772	7.90004	coding	NM_006174	NPY5R	RefSeq_coding	1936	chr4	+	164265090	164273084		AAAGGCTATCGGTAACAACTGACCTGCCACAAAGTTAGAAGAAAGGATTGATTCAAGAAA	4889	Hs.519058	GO:0004930|GO:0004983|GO:0001602|GO:0001601|GO:0004872|GO:0007186|GO:0003214|GO:0042755|GO:0060112|GO:0014050|GO:0032229|GO:0003151|GO:0002675|GO:0045768|GO:0048661|GO:0007268|GO:0005737|GO:0005887|GO:0005886|GO:0005886	NP_006165	Neuropeptide Y receptor Y5
ASHG19A3A026989	88.5882	108.39	6.39174	6.84004	coding	NM_005779	LHFPL2	RefSeq_coding	5061	chr5	-	77781039	77944648	CF135687,	TTGAGTTGACAGCTGGCCTATGGTTTCTGCATTTTGTTAAGAAGCACCTCATGCAAGCGA	10184	Hs.79299	GO:0016021|GO:0016020	NP_005770	Lipoma HMGIC fusion partner-like 2
ASHG19A3A041729	1000.46	866.426	9.88163	9.8468	coding	NM_001395	DUSP9	RefSeq_coding	2394	chrX	+	152907896	152916780		GCCTGGAGAGGATCTATGCTTGTTTGTTTTTGTAATCCATATCATAGTTGCTTTCTTTAA	1852	Hs.144879	GO:0017017|GO:0016787|GO:0004721|GO:0004725|GO:0007254|GO:0000188|GO:0006470|GO:0005737|GO:0005829|GO:0005783|GO:0005634	NP_001386	Dual specificity phosphatase 9
ASHG19A3A038817	37167.3	35218.4	15.1379	15.1461	coding	NM_017971	MRPL20	RefSeq_coding	749	chr1	-	1337276	1342693		CACAGATGATGTCCATGTTTTGTGTGAATGAAACTCAAACACTCTTCAGTTTTTAGAGTC	55052	Hs.182698	GO:0019843|GO:0003735|GO:0006412|GO:0005622|GO:0005762|GO:0005739|GO:0005840	NP_060441	Mitochondrial ribosomal protein L20
ASHG19A3A022176	85.915	74.3356	6.34349	6.2945	coding	NM_001134435	IQCG	RefSeq_coding	1981	chr3	-	197615948	197676796		GTAGGTGGAAAGGCGAACCCTGAGTGGAGGATGTTCCCGCTGCCTAAAGAATGATTGACT	84223	Hs.591675		NP_115639	IQ motif containing G
ASHG19A3A032342	624.4	603.044	9.18957	9.32645	coding	NM_030615	KIF25	RefSeq_coding	1510	chr6	+	168418552	168445769		ACCGTGGCCATGCCCCGTACCGGAACAGCAGGCTCACCCACCTCCTTCAGGACTGCCTCG	3834	Hs.150013	GO:0005524|GO:0003777|GO:0000166|GO:0007018|GO:0000070|GO:0006996|GO:0005737|GO:0005856|GO:0005871|GO:0005874	NP_085118	Kinesin family member 25
ASHG19A3A032240	272.917	258.97	8.00943	8.09925	coding	NM_001145279	OPRM1	RefSeq_coding	2738	chr6	+	154331635	154440594		GTGCCCAGTGAAGAGACCTACTCCTTGGATCGCTTTGCGCAAAATCCACCCCTTTTCCCT	4988	Hs.2353	GO:0004930|GO:0004988|GO:0005515|GO:0004872|GO:0007187|GO:0007191|GO:0002438|GO:0007610|GO:0031635|GO:0007626|GO:0008285|GO:0032100|GO:0060079|GO:0051930|GO:0042220|GO:0032094|GO:0070848|GO:0032496|GO:0043278|GO:0007600|GO:0042060|GO:0005794|GO:0032839|GO:0032590|GO:0005783|GO:0005925|GO:0005887|GO:0044424|GO:0005624|GO:0045121|GO:0043204|GO:0005886|GO:0005886|GO:0042383	NP_001138759	Opioid receptor, mu 1
ASHG19A3A010097	580.692	503.47	9.08583	9.07247	coding	NM_005993	TBCD	RefSeq_coding	4449	chr17	+	80709939	80901060		ATAAATGACACTTTGAGACATCTCCATCTCATCTCAAGTCACTCCCGCCAGCAGATGAAG	6904	Hs.728173	GO:0005096|GO:0005096|GO:0048487|GO:0051087|GO:0005515|GO:0051084|GO:0034333|GO:0044267|GO:0010812|GO:0031115|GO:0007023|GO:0006457|GO:0006457|GO:0070830|GO:0005912|GO:0030054|GO:0005737|GO:0016328|GO:0005874|GO:0005886|GO:0005923	NP_005984	Tubulin folding cofactor D
ASHG19A3A048097	3819.75	5434.43	11.8226	12.4891	coding	NM_003769	SFRS9	RefSeq_coding	1204	chr12	-	120899471	120907558		TATTTATGGAAGAAATGGTTATGATTATGGCCAGTGTCGGCTTCGTGTGGAGTTCCCCAG	8683	Hs.706889	GO:0003723|GO:0000166|GO:0008380|GO:0010467|GO:0031124|GO:0006406|GO:0006397|GO:0006376|GO:0000398|GO:0006369|GO:0006366|GO:0005654|GO:0005634	NP_003760	Serine/arginine-rich splicing factor 9
ASHG19A3A039528	74204.9	46766.4	16.1646	15.5479	coding	NM_001636	SLC25A6	RefSeq_coding	1502	chrX	-	1505044	1511039	uc004fph.2,	AAACAAAAGAATCACGTTTTCCCATTTGTACTTCAGCGCTAGCCCCTGTTTTGCACAGCC	293	Hs.350927	GO:0005471|GO:0005515|GO:0005215|GO:0046732|GO:0006915|GO:0006112|GO:0044419|GO:0050796|GO:0055085|GO:0019058|GO:0016032|GO:0019048|GO:0016021|GO:0016020|GO:0005743|GO:0005743|GO:0005744|GO:0005739	NP_001627	Solute carrier family 25 (mitochondrial carrier; adenine nucleotide translocator), member 6
ASHG19A3A020597	393.653	409.7	8.5301	8.7721	coding	NM_015381	FAM19A5	RefSeq_coding	2652	chr22	+	48972117	49147742		CAGGGGCCGCGCTCTGCTGCTTCCTCGTCCTAGTGATCCACGCGCAGTTCCTCAAAGAAG	25817	Hs.436854	GO:0005576|GO:0016021|GO:0016020	NP_056196	Family with sequence similarity 19 (chemokine (C-C motif)-like), member A5
ASHG19A3A031791	965.358	931.351	9.82678	9.94502	coding	NM_006118	HAX1	RefSeq_coding	1196	chr1	+	154245038	154248349	ENST00000411473,	TCCCTTTTTTGGAGGGATGACTCGAGATGAAGATGATGATGAGGAAGAAGAAGAAGAAGG	10456	Hs.199625	GO:0019966|GO:0047485|GO:0005515|GO:0015629|GO:0016023|GO:0005783|GO:0030027|GO:0016020|GO:0005739|GO:0005635|GO:0031965|GO:0005634|GO:0016529|GO:0005625	NP_006109	HCLS1 associated protein X-1
ASHG19A3A044808	118.368	100.453	6.80908	6.72439	coding	NM_144663	C11orf40	RefSeq_coding	654	chr11	-	4592653	4599050		TTAACTTAGATAAGGATGTGTTCATACACCAGGCCAACCACCCACTAACAGTGCCGTCTA	143501	Hs.350556		NP_653264	Chromosome 11 open reading frame 40
ASHG19A3A022603	33975	26634.3	15.0028	14.76	coding	NM_018031	WDR6	RefSeq_coding	4273	chr3	+	49044636	49053386		TGAAATCCATGCTGAGCTGTACCAGGAACTTGCATATCTAGAGACAGAGACTGAGTCACT	11180	Hs.654815	GO:0043560|GO:0005515|GO:0007049|GO:0007050|GO:0008285|GO:0005737|GO:0043234|GO:0005625	NP_060501	WD repeat domain 6
ASHG19A3A010936	3627.37	3086.94	11.7507	11.6664	coding	NM_002096	GTF2F1	RefSeq_coding	2551	chr19	-	6379579	6393291		AAGATGATCAACGACAAAATGCACTTCTCCCTCAAGGAGTGAGGCTTGGTCCAATACATG	2962	Hs.68257	GO:0003677|GO:0003824|GO:0016251|GO:0019211|GO:0005515|GO:0016563|GO:0003713|GO:0008134|GO:0008380|GO:0010467|GO:0006370|GO:0000398|GO:0050434|GO:0009615|GO:0006368|GO:0006368|GO:0006366|GO:0006367|GO:0006367|GO:0016032|GO:0030054|GO:0005654|GO:0005654|GO:0005634|GO:0005674	NP_002087	General transcription factor IIF, polypeptide 1, 74kDa
ASHG19A3A005581	69.643	65.8788	6.04368	6.12231	coding	NM_033044	MACF1	RefSeq_coding	19271	chr1	+	39796809	39952789		GAACCTCTGCCTCCAACAGTATGAGGATTTGAAACAGCCCATGGCTGAAAGGAAAGCTCA	23499	Hs.472475	GO:0003779|GO:0051015|GO:0005509|GO:0005509|GO:0008017|GO:0005515|GO:0008150|GO:0007050|GO:0005737|GO:0005737|GO:0005856|GO:0005856	NP_149033	Microtubule-actin crosslinking factor 1
ASHG19A3A053955	292.652	311.466	8.10904	8.37389	coding	NM_001077419	TMEM231	RefSeq_coding	3034	chr16	-	75572016	75590170		ATTGTGTATTTACAGAAGTGATGTGGATTCCTCCCAGACTCATTAGTGACCAGGGCTGCT	79583	Hs.156784	GO:0016021|GO:0016020	NP_001070887	Transmembrane protein 231
ASHG19A3A052299	507.69	252.416	8.89022	8.06398	coding	NM_006049	SNAPC5	RefSeq_coding	785	chr15	-	66782665	66790146		AACAAAACCCACCAGGAAGGAAAATCCAAGAGTTTCAGGTCTAGAGCTTGTGCTGCACTT	10302	Hs.30174	GO:0003700|GO:0006366|GO:0006383|GO:0006384|GO:0005654|GO:0005634	NP_006040	Small nuclear RNA activating complex, polypeptide 5, 19kDa
ASHG19A3A051316	312.639	224.302	8.20124	7.89137	coding	NM_001101663	NBPF11	RefSeq_coding	3409	chr1	-	146034018	146068245	NM_183372,NM_173638,NM_001170755,	TCCAAAGTTAATGCCAAGAAGCAGCTGCCAGTTGGGATCAAATGTGAGCCTATGGATCAA	55672	Hs.721588	GO:0005737	NP_060410	Neuroblastoma breakpoint family, member 1
ASHG19A3A044744	98.1453	92.212	6.54619	6.59779	coding	NM_001005922	KRTAP5-1	RefSeq_coding	942	chr11	-	1605571	1606513		ATTTCTGGCTTTGCAGGACTCTTACCATGGCCAGGCATTCCTGCCCAGCCTTTACCTCCT	387264	Hs.632147	GO:0045095	NP_001005922	Keratin associated protein 5-1
ASHG19A3A004232	660.619	510.705	9.27572	9.09307	coding	NM_004071	CLK1	RefSeq_coding	1933	chr2	-	201717731	201729467	NM_001162407,	TACTTCACATCGTCGTTCACATGGGAAGAGTCACCGAAGGAAAAGAACCAGGAGTGTAGA	1195	Hs.433732	GO:0005524|GO:0004715|GO:0000166|GO:0004674|GO:0016740|GO:0008283|GO:0018105|GO:0018107|GO:0018108|GO:0046777|GO:0005634	NP_004062	CDC-like kinase 1
ASHG19A3A046893	530.404	106.676	8.95555	6.81529	coding	NM_020802	KIAA1377	RefSeq_coding	7043	chr11	+	101785745	101871791		AATCAGTTCCCTTATGGAAAAGAGGTCCTAATGTCCTGCATCAAAATAAGAGGGCTACAG	57562	Hs.156352	GO:0005515	NP_065853	KIAA1377
ASHG19A3A048365	2718.63	1785.63	11.3222	10.8911	coding	NM_031412	GABARAPL1	RefSeq_coding	1885	chr12	+	10365488	10375722		CAAGTTCTTGTATAATGAAGTCAATGCCATCAGGCCAAGGAAATAAAATAATTGCTTACC	23710	Hs.524250	GO:0050811|GO:0048487|GO:0005515|GO:0005794|GO:0005776|GO:0005737|GO:0005856|GO:0005783|GO:0005622|GO:0016020|GO:0005874	NP_113600	GABA(A) receptor-associated protein like 1
ASHG19A3A048441	15489.2	11076.7	13.85	13.5091	coding	NM_018686	CMAS	RefSeq_coding	1741	chr12	+	22199158	22218601		CAGTTGTAGATGAATGGAGAAAAGAAATGGGCCTGTGCTGGAAAGAAGTGGCATATCTTG	55907	Hs.311346	GO:0008781|GO:0016779|GO:0016740|GO:0009103|GO:0005634	NP_061156	Cytidine monophosphate N-acetylneuraminic acid synthetase
ASHG19A3A002710	148.003	122.598	7.12683	7.02194	coding	NM_001144911	CLEC4M	RefSeq_coding	1779	chr19	+	7828034	7834490	NM_001144904,	AGGGTGCAGCAGCTGGGCCTCCTGGGGTGTCTTGGCCATGGCGCCCTGGTGCTGCAACTC	10332	Hs.421437	GO:0030369|GO:0005537|GO:0046872|GO:0042605|GO:0004872|GO:0005529|GO:0046790|GO:0019882|GO:0009988|GO:0006897|GO:0045087|GO:0044419|GO:0035556|GO:0046795|GO:0007159|GO:0046968|GO:0019079|GO:0019062|GO:0019048|GO:0005737|GO:0005576|GO:0005887|GO:0016020|GO:0005886	NP_055072	C-type lectin domain family 4, member M
ASHG19A3A003102	1964.18	2064.69	10.8476	11.1026	coding	NM_001161473	ALDH3B1	RefSeq_coding	2899	chr11	+	67776047	67796741		CCAGAAGACCTCACCGCCCTCCCAGGATGGACCCCCTTGGGGACACGCTGCGGCGACTGC	221	Hs.523841	GO:0004028|GO:0004030|GO:0016491|GO:0006066|GO:0006081|GO:0006629|GO:0055114	NP_001154945	Aldehyde dehydrogenase 3 family, member B1
ASHG19A3A005890	2570.88	2252.79	11.2373	11.2278	coding	NM_138740	C1orf43	RefSeq_coding	1753	chr1	-	154179182	154193273		CTACTACAACTGGAAACCCAGGGAAATCAAAAGATCCCATTTCATTCTGAAGGCCGGCAT	25912	Hs.287471	GO:0050662|GO:0016491|GO:0016021|GO:0016020	NP_620077	Chromosome 1 open reading frame 43
ASHG19A3A050745	116533	123418	16.8536	16.8915	coding	NM_001032	RPS29	RefSeq_coding	302	chr14	-	50050290	50053094		CTTCAGAGGATTATCCGGGGCATCTACTCAATGAAAAACCATGATAATTCTTTGTATATA	6235	Hs.156367	GO:0046872|GO:0005515|GO:0003735|GO:0008270|GO:0044267|GO:0031018|GO:0010467|GO:0006412|GO:0006412|GO:0006414|GO:0006415|GO:0019058|GO:0016032|GO:0019083|GO:0005737|GO:0005829|GO:0005829|GO:0022627|GO:0005622|GO:0015935	NP_001023	Ribosomal protein S29
ASHG19A3A045347	175.366	660.328	7.36895	9.458	coding	NM_138456	BATF2	RefSeq_coding	2142	chr11	-	64755416	64764517		TGGATACAGAACACAAGTCTTGGCACATATGTGATGGAAATAAAGTGTTTTGCAATCTTT	116071	Hs.124840	GO:0005515|GO:0046983|GO:0043565|GO:0003700|GO:0006355|GO:0005634	NP_612465	Basic leucine zipper transcription factor, ATF-like 2
ASHG19A3A022913	124.059	141.976	6.87635	7.22949	coding	NM_006100	ST3GAL6	RefSeq_coding	2107	chr3	+	98451571	98513234		GAAACGGAGAAATAAGATCCAGCCTTGTTTATCAAAGCCAGCTTTTGCCTCTCTGCTGAG	10402	Hs.148716	GO:0008373|GO:0006040|GO:0006664|GO:0006486|GO:0009249|GO:0005794|GO:0000139|GO:0030173|GO:0016021|GO:0016020	NP_006091	ST3 beta-galactoside alpha-2,3-sialyltransferase 6
ASHG19A3A006078	167.258	201.027	7.30194	7.73639	coding	NM_148176	PPIL2	RefSeq_coding	2736	chr22	+	22020272	22052201		GCAAGTACATCAACCCAGCAGCCACCGAGCAGCAGAGGAAGAGCCCTCAACCAGTGCCAC	23759	Hs.438587	GO:0016853|GO:0003755|GO:0004842|GO:0007596|GO:0050900|GO:0006457|GO:0000209|GO:0005796|GO:0005730|GO:0005634|GO:0005634|GO:0000151	NP_680481	Peptidylprolyl isomerase (cyclophilin)-like 2
ASHG19A3A052605	30380.1	42254.6	14.8359	15.4055	coding	NM_003090	SNRPA1	RefSeq_coding	1068	chr15	-	101821716	101835460		GCAAAGTGGAATCTATCAGCATTGTTGAAATGCTTAAGACTGCTGCTGATAATTTTGTAA	6627	Hs.528763	GO:0003723|GO:0005515|GO:0008380|GO:0010467|GO:0000398|GO:0000398|GO:0005686|GO:0071013|GO:0005654|GO:0005634|GO:0030532|GO:0005681	NP_003081	Small nuclear ribonucleoprotein polypeptide A'
ASHG19A3A000862	321.308	398.968	8.24168	8.73222	coding	NM_001007551	CT45A5	RefSeq_coding	1321	chrX	-	134945650	134953994	NM_152582,NM_001017417,	GAGGTGCCGCCGTCTCTCCTCCAGCAAGGAAACAATGACCGATAAAACAGAGAAGGTGGC	441521	Hs.535081		NP_001165759	Cancer/testis antigen family 45, member A5
ASHG19A3A046645	4404.05	7574.02	12.0298	12.9605	coding	NM_024036	LRFN4	RefSeq_coding	2546	chr11	+	66624875	66627945		GCTGCAGCCACCCACTGGGAGTCTTGTTTTTATTTATAATAAAATTGTTGGGGACACCTC	78999	Hs.209979	GO:0016021|GO:0016020	NP_076941	Leucine rich repeat and fibronectin type III domain containing 4
ASHG19A3A011876	5749.96	2968.73	12.4092	11.6118	coding	NM_001618	PARP1	RefSeq_coding	4001	chr1	-	226548392	226595801		AAGTATGTTAAGAACACTCATGCAACCACACACAATGCGTATGACTTGGAAGTCATCGAT	142	Hs.177766	GO:0003677|GO:0051287|GO:0003950|GO:0042802|GO:0046872|GO:0047485|GO:0005515|GO:0008134|GO:0016757|GO:0008270|GO:0042769|GO:0006281|GO:0006284|GO:0032869|GO:0006471|GO:0016540|GO:0040009|GO:0000723|GO:0006366|GO:0005622|GO:0005635|GO:0005730|GO:0005654|GO:0005634|GO:0005667	NP_001609	Poly (ADP-ribose) polymerase 1
ASHG19A3A050821	280.226	286.417	8.04571	8.24908	coding	NM_021728	OTX2	RefSeq_coding	2209	chr14	-	57267426	57277184		GCTGGCTATTTGGAATTTAAAGGATATTTGACTTTTTCTAACCTCCCATGAGGCTGTAAG	5015	Hs.288655	GO:0008190|GO:0046982|GO:0043565|GO:0003700|GO:0030528|GO:0009952|GO:0007411|GO:0001708|GO:0007417|GO:0009953|GO:0007492|GO:0042706|GO:0030900|GO:0042472|GO:0030901|GO:0007275|GO:0048663|GO:0009887|GO:0045944|GO:0040036|GO:0008589|GO:0006355|GO:0006351|GO:0005737|GO:0030426|GO:0005634	NP_758840	Orthodenticle homeobox 2
ASHG19A3A006027	196.505	303.128	7.53505	8.33579	coding	NM_145733	SEPT3	RefSeq_coding	2469	chr22	+	42372930	42394223		CAATGACAATGGAGGCCTCCCTCCGGGAGAAGGCCTCCTGGGCACTGTCCTTCCACCTGT	55964	Hs.120483	GO:0005525|GO:0003674|GO:0000166|GO:0007049|GO:0000910|GO:0030054|GO:0005737|GO:0005856|GO:0031105|GO:0045202	NP_663786	Septin 3
ASHG19A3A045387	2881.16	3819.9	11.3973	11.9768	coding	NM_006876	B3GNT1	RefSeq_coding	2077	chr11	-	66112843	66115161		AGTTCTTAGCTCTTGAACAGAAGCCTAAAATTCCTGGTTCTCTCAGGGCTTCGCCTTCAA	11041	Hs.8526	GO:0008532|GO:0016757|GO:0030311|GO:0005794|GO:0000139|GO:0030173|GO:0016021|GO:0016020	NP_006867	UDP-GlcNAc:betaGal beta-1,3-N-acetylglucosaminyltransferase 1
ASHG19A3A019598	445.739	500.952	8.70807	9.06633	coding	NM_207644	C22orf36	RefSeq_coding	1240	chr22	-	24981590	24989035		AAATCCAGTGTAAATGCTCAGCCTGAGATTAAGGGGACAGAAGAATGGACTCATAGGTGG	388886	Hs.113314		NP_997527	Chromosome 22 open reading frame 36
ASHG19A3A000610	205.368	240.622	7.59847	7.99209	coding	NM_000759	CSF3	RefSeq_coding	1602	chr17	+	38171613	38174065		GCTCCAGGAGAAGCTGGTGAGTGAGTGTGCCACCTACAAGCTGTGCCACCCCGAGGAGCT	1440	Hs.2233	GO:0005125|GO:0019899|GO:0005130|GO:0008083|GO:0019221|GO:0030851|GO:0006955|GO:0007275|GO:0008284|GO:0005576|GO:0005615	NP_757374	Colony stimulating factor 3 (granulocyte)
ASHG19A3A040798	162.168	290.933	7.25934	8.2704	coding	NM_002367	MAGEB4	RefSeq_coding	2266	chrX	+	30260056	30262295		TCCATTGTCTTCCCTCCATTAAGAGAAGACTTTAAGAGATGAGGGAGAGAGAGCCAGAGA	4115	Hs.113291		NP_002358	Melanoma antigen family B, 4
ASHG19A3A019699	209.611	148.939	7.62908	7.3027	coding	NM_019843	EIF4ENIF1	RefSeq_coding	3704	chr22	-	31835345	31885874	NM_001164501,	TAAGATACTAGAAGAAGATCACAAAGGGAGAAAAAGAACAAGGCGACGGACAGCCTCTGT	56478	Hs.517559	GO:0005515|GO:0008565|GO:0015031|GO:0005737|GO:0005829|GO:0043231|GO:0005634	NP_062817	Eukaryotic translation initiation factor 4E nuclear import factor 1
ASHG19A3A045656	185.527	117.805	7.45284	6.96154	coding	NM_152434	CWF19L2	RefSeq_coding	3285	chr11	-	107197073	107328572		AAGAGTATGGCCTGTGAACACACCCGGAAAATCTCTGGAATCACAAGGAGGAAGAAGAAA	143884	Hs.212140	GO:0003824	NP_689647	CWF19-like 2, cell cycle control (S. pombe)
ASHG19A3A029841	713.505	407.708	9.3892	8.766	coding	NM_007271	STK38	RefSeq_coding	3593	chr6	-	36461673	36515247		CACCAACTTGGATTCATCCACAGAGACATCAAACCAGACAACCTTCTTTTGGACAGCAAG	11329	Hs.409578	GO:0005524|GO:0000287|GO:0031435|GO:0000166|GO:0005515|GO:0004674|GO:0007243|GO:0043407|GO:0006464|GO:0006468|GO:0070688|GO:0005737|GO:0005634	NP_009202	Serine/threonine kinase 38
ASHG19A3A014750	231.823	172.078	7.77113	7.51067	coding	NM_182521	ZSWIM2	RefSeq_coding	2446	chr2	-	187692206	187713897		TTATGCCAGGAATGTTTTGATAGCTGCTGCCATCTTTCCCACACGTTTACATTTCGTGAG	151112	Hs.375054	GO:0016874|GO:0046872|GO:0043621|GO:0004842|GO:0008270|GO:0000209|GO:0042981	NP_872327	Zinc finger, SWIM-type containing 2
ASHG19A3A018818	828.682	462.001	9.60575	8.94573	coding	NM_017613	DONSON	RefSeq_coding	2189	chr21	-	34950211	34961014		TGGAAAGACAAGTCCTTGGTCAAATGATGCAACCCTGCAGCATGTTTTAATGAGTGACTG	29980	Hs.436341	GO:0003674|GO:0008150|GO:0007275|GO:0005575|GO:0005634	NP_060083	Downstream neighbor of SON
ASHG19A3A012164	5318.86	4055.36	12.2977	12.061	coding	NM_004218	RAB11B	RefSeq_coding	1635	chr19	+	8455204	8469315	BX647356,	AGATTCTTTATACACTTTGTAAGATTTACGCCAAACCCCAGCTCTCGATCTCTTCTTCTC	9230	Hs.626404	GO:0019003|GO:0005525|GO:0003924|GO:0000166|GO:0006184|GO:0006184|GO:0007049|GO:0015031|GO:0007264|GO:0016023|GO:0005739|GO:0005886	NP_004209	RAB11B, member RAS oncogene family
ASHG19A3A015463	113.709	103.899	6.75349	6.77598	coding	NM_002709	PPP1CB	RefSeq_coding	4991	chr2	+	28974625	29025805		TGTTTATTTATTTATTTTCCGTGGGTGCCTCCGAGTGTGCGCGCGCTCTCGCTACCCGGC	5500	Hs.702907	GO:0016787|GO:0046872|GO:0017018|GO:0050115|GO:0005515|GO:0005975|GO:0007049|GO:0051301|GO:0005977|GO:0006629|GO:0006470|GO:0005979|GO:0005981|GO:0019433|GO:0070688|GO:0072357|GO:0005737|GO:0042587|GO:0005730|GO:0005654|GO:0005634|GO:0000164	NP_996759	Protein phosphatase 1, catalytic subunit, beta isozyme
ASHG19A3A002616	1544.68	1439.07	10.5052	10.5786	coding	NM_001143680	GSTK1	RefSeq_coding	1022	chr7	+	142960521	142966221		GCTGTGGATGCGCGTCTGGTCAAGGGCTGCAGAGAAGGCTGGTATGTCTGCAGAACAAGC	373156	Hs.390667	GO:0004364|GO:0042802|GO:0005515|GO:0015035|GO:0016740|GO:0005622|GO:0043231|GO:0030288|GO:0005777	NP_057001	Glutathione S-transferase kappa 1
ASHG19A3A002333	236.428	320.675	7.79996	8.41351	coding	NM_001135651	EIF2AK2	RefSeq_coding	2696	chr2	-	37333698	37384190		gcggcggcggcggcggcggcggcggcgCAGTTTCTGGAGCAAATTCAGTTTGCCTTCCTG	5610	Hs.131431	GO:0005524|GO:0003725|GO:0004694|GO:0000166|GO:0005515|GO:0008601|GO:0004674|GO:0030683|GO:0044419|GO:0019054|GO:0008285|GO:0033689|GO:0046777|GO:0006468|GO:0009615|GO:0019058|GO:0019048|GO:0005829|GO:0005622	NP_002750	Eukaryotic translation initiation factor 2-alpha kinase 2
ASHG19A3A049683	111.997	106.491	6.73363	6.81268	coding	NM_001122659	EDNRB	RefSeq_coding	4320	chr13	-	78469615	78492966	NM_003991,	TATTAGCGTTTGCAGCGACTTGGCTCGGGCAGCTGACCCAAGTGTCCTGTCTTCCTTCCT	1910	Hs.82002	GO:0004930|GO:0001600|GO:0001600|GO:0001600|GO:0017046|GO:0004872|GO:0007200|GO:0007166|GO:0048484|GO:0048246|GO:0007194|GO:0032269|GO:0010553|GO:0010553|GO:0014043|GO:0007399|GO:0042310|GO:0014826|GO:0005887|GO:0005886|GO:0005886	NP_003982	Endothelin receptor type B
ASHG19A3A007056	1783.01	1261.68	10.7151	10.3893	coding	NM_212461	PRKAG1	RefSeq_coding	1756	chr12	-	49396055	49412592		GGTTGTATTTGATACGTCCCTGCAGTCCTGCCCCTGTGGATTTGCCTTTATGATTATTAC	5571	Hs.530862	GO:0016208|GO:0004691|GO:0008603|GO:0005515|GO:0019901|GO:0007050|GO:0006633|GO:0008286|GO:0045860|GO:0051291|GO:0006468|GO:0050790|GO:0046320|GO:0006110|GO:0007165|GO:0007283|GO:0031588|GO:0005829|GO:0005829|GO:0005634	NP_002724	Protein kinase, AMP-activated, gamma 1 non-catalytic subunit
ASHG19A3A012642	62118.4	53355.8	15.9006	15.7192	coding	NM_013234	EIF3K	RefSeq_coding	910	chr19	+	39109721	39127595	AF119846,	TCCAGCATCATGGCCTCCTCCCAGTAACTTCAGGTGTTTAATAAAGATGTGTTGACTCAG	27335	Hs.314359	GO:0005515|GO:0043022|GO:0003743|GO:0003743|GO:0044267|GO:0010467|GO:0006446|GO:0006412|GO:0006413|GO:0006413|GO:0005737|GO:0005829|GO:0005829|GO:0005852|GO:0005634	NP_037366	Eukaryotic translation initiation factor 3, subunit K
ASHG19A3A041313	189.889	130.107	7.48368	7.10751	coding	NM_177948	ARMCX3	RefSeq_coding	3318	chrX	+	100878350	100882831		TCGCCGCCCGCTTTCCAAGACATATGTCCCGCTTGCAGCCCATTTCGATGCTGCGAAACG	51566	Hs.592225	GO:0005488|GO:0016021|GO:0016020	NP_808817	Armadillo repeat containing, X-linked 3
ASHG19A3A040542	6734.44	8823.77	12.6347	13.1869	coding	NM_004344	CETN2	RefSeq_coding	1087	chrX	-	151995872	151999301		ATGATGATGAAACTGGGAAGATTTCGTTCAAAAATCTGAAACGCGTGGCCAAGGAGTTGG	1069	Hs.82794	GO:0005524|GO:0008026|GO:0031683|GO:0005509|GO:0003676|GO:0005515|GO:0000086|GO:0051301|GO:0007099|GO:0007067|GO:0000278|GO:0006289|GO:0032465|GO:0007283|GO:0071942|GO:0005814|GO:0005813|GO:0005813|GO:0005737|GO:0005856|GO:0005829|GO:0005622|GO:0005932|GO:0005634|GO:0032391	NP_004335	Centrin, EF-hand protein, 2
ASHG19A3A000609	94.1308	102.164	6.48296	6.74998	coding	NM_000755	CRAT	RefSeq_coding	2766	chr9	-	131857074	131873070		GTTAGCCTTCGCTGCCAGGACCGTGGTGAAGCCTCTGGGCTTCCTGAAGCCCTTCTCCTT	1384	Hs.12068	GO:0008415|GO:0004092|GO:0016740|GO:0044255|GO:0015980|GO:0033540|GO:0033540|GO:0006631|GO:0006091|GO:0006810|GO:0005783|GO:0016020|GO:0005743|GO:0005739|GO:0005782|GO:0005777	NP_000746	Carnitine O-acetyltransferase
ASHG19A3A006680	302.712	197.07	8.15646	7.7053	coding	NM_183245	INVS	RefSeq_coding	3370	chr9	+	102861510	103063426		GTTCCCTCTGTTGAGAAGTCCAGAGAGCTCCGACTGCAGATAATTCAGAGAGAACGAAGG	27130	Hs.558477	GO:0005516|GO:0005515|GO:0016055|GO:0060971|GO:0001822|GO:0090090|GO:0031016|GO:0009791|GO:0005737|GO:0005856|GO:0016020|GO:0005874|GO:0005634|GO:0005819	NP_899068	Inversin
ASHG19A3A037587	295.624	358.699	8.12224	8.57995	coding	NM_017881	C9orf95	RefSeq_coding	1207	chr9	-	77676117	77703133	NR_023352,	TATATGGAATAGAAGCTATTTCCTGACTATTCCATATGAAGAATGTAAAAGGAGGAGGAG	54981	Hs.494186	GO:0005524|GO:0046872|GO:0000166|GO:0050262|GO:0016740|GO:0019363	NP_060351	Chromosome 9 open reading frame 95
ASHG19A3A021516	1022.43	1121.97	9.91507	10.2208	coding	NM_001164475	SLC41A3	RefSeq_coding	1970	chr3	-	125725200	125820391		GAGACTGGACCCAGCTTTCCAGCTTTCTTCCCCTTTCCATAATTCTCCTGAAAGTGTAAG	54946	Hs.573007	GO:0008324|GO:0016021|GO:0005886	NP_060306	Solute carrier family 41, member 3
ASHG19A3A008197	274.778	320.448	8.01925	8.41258	coding	NM_139285	GAS2L2	RefSeq_coding	3025	chr17	-	34071536	34079897		CCCTGGCCATGCCCACCTGTTTCCATAACTCCCATAAGTTATTAAATGCATGTGATTCTG	246176	Hs.591194	GO:0007050|GO:0005737|GO:0005856	NP_644814	Growth arrest-specific 2 like 2
ASHG19A3A003129	363.364	423.517	8.4164	8.82017	coding	NM_001161780	PDP1	RefSeq_coding	4247	chr8	+	94929161	94938294		ATCGTTTGGTCTCCTGCCGTGCCCGGAGAATGTGTGTGTGTCCCGGGCCCAGACGAATTG	54704	Hs.22265	GO:0004741|GO:0016787|GO:0000287|GO:0004724|GO:0032403|GO:0006470|GO:0006090|GO:0010510|GO:0005759|GO:0005739|GO:0008287	NP_060914	Pyruvate dehyrogenase phosphatase catalytic subunit 1
CUST_3_PI418767722	20723.3	20108.3	14.2544	14.3718	coding	NM_002539	ODC1	RefSeq_coding	2062	chr2	-	10580507	10588453		CTGAACAAGCATTTGTAGCTTGTACAATGGCAGAATGGGCCAAAAGCTTAGTGTTGTGAC	4953	Hs.467701	GO:0016829|GO:0004586|GO:0005515|GO:0034641|GO:0006596|GO:0006595|GO:0006521|GO:0009615|GO:0005575|GO:0005829	NP_002530	Ornithine decarboxylase 1
ASHG19A3A021357	90685.7	106186	16.4899	16.6875	coding	NM_000986	RPL24	RefSeq_coding	579	chr3	-	101399933	101405563		CCCGAGTTGGTGGAAAACGCTAAACTGGCAGATTAGATTTTTAAATAAAGATTGGATTAT	6152	Hs.477028	GO:0003723|GO:0005515|GO:0003735|GO:0044267|GO:0031018|GO:0010458|GO:0010467|GO:0031575|GO:0021554|GO:0060041|GO:0031290|GO:0000027|GO:0006412|GO:0006414|GO:0006415|GO:0019058|GO:0016032|GO:0019083|GO:0005829|GO:0005829|GO:0022625|GO:0005840	NP_000977	Ribosomal protein L24
ASHG19A3A016925	152.436	379.617	7.17065	8.66069	coding	NM_001135248	MFAP2	RefSeq_coding	1121	chr1	-	17300999	17307173		CGGGCCAAGGGGCGGCTCCGGCGGGCGGACTCGGAGCGGGCGGCGGAGTGACCCGGACAG	4237	Hs.389137	GO:0005576|GO:0001527|GO:0005578	NP_059453	Microfibrillar-associated protein 2
ASHG19A3A018119	1404.36	760.746	10.3677	9.66119	coding	NM_012255	XRN2	RefSeq_coding	3449	chr20	+	21283941	21370463		TGCTTCAGACTTTGAAGGCATTGCAGACATGCCATCTGATTTTGAGAAGGGTACGAAACC	22803	Hs.255932	GO:0008409|GO:0004534|GO:0016787|GO:0046872|GO:0004518|GO:0003676|GO:0005515|GO:0008270|GO:0000738|GO:0006401|GO:0016070|GO:0006396|GO:0016049|GO:0006397|GO:0006139|GO:0007283|GO:0006353|GO:0005622|GO:0005730|GO:0005634	NP_036387	5'-3' exoribonuclease 2
ASHG19A3A048295	3137.9	2145.44	11.5323	11.158	coding	NM_001975	ENO2	RefSeq_coding	2423	chr12	+	7023613	7032859		AGAATGGGAAGGGTCATAGAAAGGGCCTTGACATCAGTTCCTTTGTGTGTACTCACTGAA	2026	Hs.511915	GO:0016829|GO:0000287|GO:0004634|GO:0046982|GO:0042803|GO:0005975|GO:0006094|GO:0006006|GO:0006096|GO:0042493|GO:0032355|GO:0014070|GO:0005737|GO:0005829|GO:0005626|GO:0005622|GO:0043204|GO:0000015|GO:0001917|GO:0005886|GO:0005625|GO:0019717	NP_001966	Enolase 2 (gamma, neuronal)
ASHG19A3A019309	2897.49	2096.46	11.4063	11.1232	coding	NM_021075	NDUFV3	RefSeq_coding	2151	chr21	+	44313377	44329772		CAATTTGGAGACAGTTCCTGTTGAGAATAACCACGGTTTCCATGAAAAGACAGCAGCGCT	4731	Hs.473937	GO:0008137|GO:0006120|GO:0022904|GO:0006810|GO:0005737|GO:0016020|GO:0005743|GO:0005747|GO:0005747|GO:0005739|GO:0005730|GO:0005634|GO:0070469	NP_066553	NADH dehydrogenase (ubiquinone) flavoprotein 3, 10kDa
ASHG19A3A015987	7820.38	6802.26	12.8558	12.8104	coding	NM_016044	FAHD2A	RefSeq_coding	1313	chr2	+	96068447	96078878	NM_199336,	TCTTCTCGGTAGAAGGGAGAAGGACAGAGCTCTCTTCAATAAATTCGTCAGGTCAAAGCA	51011	Hs.546387	GO:0016787|GO:0046872	NP_057128	Fumarylacetoacetate hydrolase domain containing 2A
ASHG19A3A006584	15623.1	12523	13.8635	13.6828	coding	NM_181803	UBE2C	RefSeq_coding	520	chr20	+	44441254	44445594		ACAGCAGGAGCTGATGACCCTCATGAACCCAACATTGATAGTCCCTTGAACACACATGCT	11065	Hs.93002	GO:0005524|GO:0016881|GO:0016874|GO:0000166|GO:0005515|GO:0004842|GO:0004842|GO:0051488|GO:0031145|GO:0031145|GO:0031145|GO:0007049|GO:0000075|GO:0051301|GO:0008054|GO:0010458|GO:0010994|GO:0007067|GO:0000278|GO:0007094|GO:0051436|GO:0048015|GO:0031536|GO:0051437|GO:0043687|GO:0070979|GO:0070936|GO:0016567|GO:0051439|GO:0007051|GO:0006511|GO:0005680|GO:0005829|GO:0005829|GO:0005654|GO:0005654	NP_861519	Ubiquitin-conjugating enzyme E2C
ASHG19A3A015067	190.055	125.693	7.48571	7.05805	coding	NM_014689	DOCK10	RefSeq_coding	7431	chr2	-	225629806	225907330		TTTGCACAATGGAAGAAGTGGACATGATCAGACTGCAGCTCAAACTGCAAGGAAGTGTCA	55619	Hs.46578	GO:0005525|GO:0051020|GO:0017048|GO:0005089|GO:0005085	NP_055504	Dedicator of cytokinesis 10
ASHG19A3A046179	25864.9	23403.8	14.5923	14.577	coding	NM_005013	NUCB2	RefSeq_coding	1612	chr11	+	17298285	17353069		AAAGAAGAGCTACAACGTCAGCATGATCAACTGGAGGCTCAGAAGCTGGAATATCATCAG	4925	Hs.654599	GO:0003677|GO:0005509|GO:0005793|GO:0005794|GO:0005797|GO:0005737|GO:0005829|GO:0005783|GO:0005576|GO:0005615|GO:0005640|GO:0005634|GO:0005886	NP_005004	Nucleobindin 2
ASHG19A3A006245	160.929	187.827	7.24935	7.63512	coding	NM_153746	ZDHHC14	RefSeq_coding	2774	chr6	+	157802556	158094976		GGCCACGCAGTCACAGAGTGACATGGCTGCAGCCACGCCCCTGCTGCAGAGCGAGCCCAG	79683	Hs.187459	GO:0008415|GO:0046872|GO:0016740|GO:0008270|GO:0016021|GO:0016020	NP_714968	Zinc finger, DHHC-type containing 14
ASHG19A3A009572	114.056	106.407	6.75788	6.81166	coding	NM_177441	TMUB2	RefSeq_coding	2443	chr17	+	42264573	42269098		AATAGGACCATCCAAAAGCGGAACCTTCGCCTCAGAAAAAGGGTGCGGGACCCCTCCTCA	79089	Hs.181391	GO:0016021|GO:0016020	NP_803190	Transmembrane and ubiquitin-like domain containing 2
ASHG19A3A054012	13063.6	14084	13.6057	13.8508	coding	NM_021149	COTL1	RefSeq_coding	1850	chr16	-	84599205	84651669		TCTGTACTGTATTGGGATTGTAAAGAACATCTCTGCACTCAGACAGTTTACAGAAATAAA	23406	Hs.289092	GO:0003779|GO:0019899|GO:0005515|GO:0008150|GO:0050832|GO:0005575|GO:0005737|GO:0005856|GO:0005622	NP_066972	Coactosin-like 1 (Dictyostelium)
ASHG19A3A021361	52.5519	325.012	5.63105	8.43528	coding	NM_170662	CBLB	RefSeq_coding	3976	chr3	-	105377109	105587887		AATGACAAAGATGTCAAGATTGAGCCTTGTGGGCATTTGATGTGCACCTCTTGCCTTACG	868	Hs.430589	GO:0005509|GO:0016874|GO:0004871|GO:0008270|GO:0006607|GO:0042110|GO:0007166|GO:0006955|GO:0050860|GO:0046642|GO:0002669|GO:0045732|GO:0007165|GO:0005737|GO:0005730|GO:0005634	NP_733762	Cas-Br-M (murine) ecotropic retroviral transforming sequence b
ASHG19A3A034606	534.226	267.493	8.96774	8.1488	coding	NM_001131008	PTPN12	RefSeq_coding	3122	chr7	+	77167351	77269388	NM_002835,	GGACCTTTAGCAAATACAGTAATAGATTTTTGGAGGATGATATGGGAGTATAATGTTGTG	5782	Hs.61812	GO:0017124|GO:0016787|GO:0004726|GO:0005515|GO:0006470|GO:0005737|GO:0005829|GO:0005625	NP_002826	Protein tyrosine phosphatase, non-receptor type 12
ASHG19A3A046940	845.941	825.169	9.63269	9.77938	coding	NM_022761	C11orf1	RefSeq_coding	984	chr11	+	111749947	111754795		TTTTTTCACCTCGTCTGAAATGGCTGCCTCCCAGTGTCTCTGCTGCTCAAAATTTCTCTT	64776	Hs.17546	GO:0003674|GO:0008150|GO:0005634	NP_073598	Chromosome 11 open reading frame 1
ASHG19A3A001499	186.109	121.564	7.4572	7.00798	coding	NM_001077352	RBM23	RefSeq_coding	2522	chr14	-	23369854	23388396		TACAGGAGTCCTCCACTTGCCACTGGGGAGCCAGTTGATAATCTGAGTCCTGAGGAGCGT	55147	Hs.4997	GO:0003723|GO:0000166|GO:0006397|GO:0005634	NP_060577	RNA binding motif protein 23
ASHG19A3A030774	145.207	165.059	7.09691	7.44996	coding	NM_019032	ADAMTSL4	RefSeq_coding	4209	chr1	+	150521897	150533410		CCTCCTGAAATGGTTCCCACCCAGAACTAATTTATTTTTTATTAAAGATGGTCATGACAA	54507	Hs.516243	GO:0004222|GO:0008233|GO:0002020|GO:0005515|GO:0030198|GO:0043065|GO:0005575|GO:0031012|GO:0005576|GO:0005614	NP_079284	ADAMTS-like 4
ASHG19A3A006105	120.362	116.656	6.83218	6.94657	coding	NM_148966	TNFRSF25	RefSeq_coding	1527	chr1	-	6521220	6526255		GCCGCTGTCTGTGGCTGGAGGCAGAATGAAGCTGGGATGGAGGCTCTGACCCCACCACCG	8718	Hs.462529	GO:0004872|GO:0005031|GO:0006915|GO:0007166|GO:0006917|GO:0008624|GO:0042981|GO:0007165|GO:0033209|GO:0005829|GO:0005576|GO:0005887|GO:0005886	NP_683871	Tumor necrosis factor receptor superfamily, member 25
ASHG19A3A029621	564.578	625.125	9.0429	9.37775	coding	NM_006398	UBD	RefSeq_coding	1006	chr6	-	29523389	29527702		TATATAAGCTGCATGCAAAGTCCTTTTTCTGTCTCTGGTTTCTGGCCCCTTGTCTGCAGA	10537	Hs.728313	GO:0070628|GO:0005515|GO:0070842|GO:0043011|GO:0035417|GO:0043123|GO:0043065|GO:0032446|GO:0016567|GO:0006508|GO:0034341|GO:0034612|GO:0006511|GO:0016235|GO:0005737|GO:0005634	NP_006389	Ubiquitin D
ASHG19A3A050418	2805	3433.19	11.3666	11.8221	coding	NM_001144072	UBAC2	RefSeq_coding	2696	chr13	+	99852678	100038751		TCTGACCGCCATCGTTTCAACCTGGAGAGGTGAGCCCTCCCCTACCGACGCACTTCCCTT	337867	Hs.508545	GO:0016021|GO:0016020	NP_808882	UBA domain containing 2
ASHG19A3A004034	291.146	245.571	8.10272	8.02315	coding	NM_206819	MYBPC1	RefSeq_coding	3879	chr12	+	101988746	102079657	NM_002465,	TCCCCGCCTAGCGCCTTGCCTCCAGGTTTGGGTAGTCGGGCCCTGGAGAGAAAAGATTCA	4604	Hs.654589	GO:0003779|GO:0008307|GO:0031432|GO:0007155|GO:0030049|GO:0005829|GO:0030016|GO:0032982	NP_996557	Myosin binding protein C, slow type
ASHG19A3A004945	640.757	1161.92	9.22908	10.2718	coding	NM_001018054	LRP8	RefSeq_coding	4351	chr1	-	53711217	53793726	NM_017522,	CTGCTCAGATTGGCCATGTCTATCCTGCACGAGTGGCATTAAGCCTTGAAGATGATGGAC	7804	Hs.726256	GO:0034187|GO:0005509|GO:0005515|GO:0004888|GO:0030229|GO:0007596|GO:0019221|GO:0006897|GO:0021766|GO:0021819|GO:0006629|GO:0030168|GO:0045860|GO:0006508|GO:0007165|GO:0005901|GO:0005576|GO:0005615|GO:0016021|GO:0005886	NP_150643	Low density lipoprotein receptor-related protein 8, apolipoprotein e receptor
ASHG19A3A040008	128.289	226.661	6.92442	7.9065	coding	NM_002547	OPHN1	RefSeq_coding	7531	chrX	-	67262187	67653299		ATTTCAAAGCGCTTGCTGCGAGAAAGGACGGTTTTCTATACTTCTTCCCTGGATGAAAGC	4983	Hs.128824	GO:0005096|GO:0005100|GO:0017124|GO:0003779|GO:0008093|GO:0035255|GO:0030036|GO:0007411|GO:0006897|GO:0046847|GO:0007399|GO:0051056|GO:0007165|GO:0007264|GO:0006930|GO:0015629|GO:0030424|GO:0030054|GO:0042995|GO:0005829|GO:0043197|GO:0005622|GO:0045202	NP_002538	Oligophrenin 1
ASHG19A3A051713	460.629	267.33	8.75402	8.1478	coding	NM_175748	UBR7	RefSeq_coding	3709	chr14	+	93673400	93695555		GGAATTTGTTTAGCTTGCAGTTATGAATGTCATGGAAGTCACAAACTATTTGAGCTATAC	55148	Hs.728932	GO:0016874|GO:0046872|GO:0003674|GO:0004842|GO:0008270|GO:0008150	NP_786924	Ubiquitin protein ligase E3 component n-recognin 7 (putative)
ASHG19A3A005034	71.9006	127.831	6.08831	7.08283	coding	NM_018374	TMEM106B	RefSeq_coding	6514	chr7	+	12250847	12276889		GGACTGCGCAGCGCCCCGCGTGCCGATCTTTTCCTAATTCAGCAGCGATTTAACCAAGAG	54664	Hs.396358	GO:0003674|GO:0008150|GO:0005575|GO:0016021|GO:0016020	NP_060844	Transmembrane protein 106B
CUST_14_PI418767722	52681.4	49783.3	15.6589	15.6366	coding	NM_004309	ARHGDIA	RefSeq_coding	1912	chr17	-	79825597	79829238		TCAGGCAGAGGCGCCTGTCCCTGCTTCTTTTCTGACCGGGAAATAAATGCCCCTGAAGGA	396	Hs.159161	GO:0005096|GO:0005094|GO:0042802|GO:0005515|GO:0007266|GO:0006916|GO:0006928|GO:0050771|GO:0007162|GO:0048011|GO:0050772|GO:0050770|GO:0032880|GO:0051056|GO:0007264|GO:0005737|GO:0005856|GO:0005829|GO:0005829|GO:0001772	NP_004300	Rho GDP dissociation inhibitor (GDI) alpha
ASHG19A3A002591	179.262	153.746	7.40113	7.34819	coding	NM_001142625	RAB34	RefSeq_coding	1118	chr17	-	27041298	27045286		AAAGACGCCCTCCAGGTGGCCCAGGAGATGAAGACTGTTCAGAGACTGCCCAGCCCTAGG	83871	Hs.301853	GO:0005525|GO:0003924|GO:0019001|GO:0000166|GO:0006897|GO:0015031|GO:0007264|GO:0005794|GO:0005737|GO:0005769|GO:0001726	NP_114140	RAB34, member RAS oncogene family
ASHG19A3A011531	465.719	315.028	8.76803	8.39079	coding	NM_198850	PHLDB3	RefSeq_coding	2505	chr19	-	43979255	44008985		TGTCATCTACTTCCAGGCCATTGAGGAAGTCTATTATGACCACTTACGCTGTGCCTTCAA	653583	Hs.631581		NP_942147	Pleckstrin homology-like domain, family B, member 3
ASHG19A3A047996	677.574	1174.91	9.31211	10.2854	coding	NM_052845	MMAB	RefSeq_coding	4154	chr12	-	109991522	110011358		CAAAGATGACCAAGTGTTTGAAGCCGTGGGAACTACAGATGAATTAAGTTCAGCTATTGG	326625	Hs.12106	GO:0005524|GO:0008817|GO:0000166|GO:0016740|GO:0009236|GO:0005739	NP_443077	Methylmalonic aciduria (cobalamin deficiency) cblB type
ASHG19A3A042840	198.236	141.319	7.54475	7.22309	coding	NM_005436	CCDC6	RefSeq_coding	6215	chr10	-	61548521	61666818		ACGGTTGGTTTCACGCCACCAACTTCACTGACTAGAGCTGGAATGTCTTATTACAATTCC	8030	Hs.591360	GO:0017124|GO:0005515|GO:0005200|GO:0008150|GO:0005737|GO:0005856	NP_005427	Coiled-coil domain containing 6
ASHG19A3A042856	208.292	201.676	7.61864	7.7409	coding	NM_000399	EGR2	RefSeq_coding	2992	chr10	-	64571759	64576126	NM_001136179,	TTTCTTGGTGTGTGTGGTGGTTGTTTTTAAGTGTGGAGGGCAAAAGGAGATACCATCCCA	1959	Hs.1395	GO:0003677|GO:0001102|GO:0046872|GO:0005515|GO:0003700|GO:0030528|GO:0031625|GO:0008270|GO:0014037|GO:0007420|GO:0035284|GO:0021612|GO:0045444|GO:0032569|GO:0007611|GO:0008045|GO:0042552|GO:0007422|GO:0045944|GO:0048168|GO:0030278|GO:0006355|GO:0032868|GO:0021569|GO:0021660|GO:0021666|GO:0007622|GO:0006351|GO:0005622|GO:0005634	NP_001129651	Early growth response 2
ASHG19A3A002676	103.342	90.1343	6.61901	6.56327	coding	NM_001144058	NTM	RefSeq_coding	3408	chr11	+	131780711	132206715		TGAAAACTACAGCCCTGACCCCTTGGAAAGGTCCAGGCGCCGTCAGCGAGGTGAGCAACG	50863	Hs.504352	GO:0007155|GO:0008038|GO:0031225|GO:0005886	NP_057606	Neurotrimin
ASHG19A3A015724	1872.18	2067.26	10.7863	11.1056	coding	NM_018438	FBXO6	RefSeq_coding	1565	chr1	+	11724149	11734407		CCAGCTTGTGGTAACTTACTGTCACATAGCTCTGACGTTTTGTTGTAATAAATGTTTTCA	26270	Hs.464419	GO:0030246|GO:0001948|GO:0005515|GO:0004842|GO:0000077|GO:0006281|GO:0030433|GO:0031146|GO:0006516|GO:0030163|GO:0006508|GO:0006986|GO:0019005|GO:0005737	NP_060908	F-box protein 6
ASHG19A3A055007	80.5697	84.4406	6.2531	6.47518	coding	NM_002548	OR1D2	RefSeq_coding	939	chr17	-	2995352	2996290		GTGCTGATTATCAGAGCCATCCTCAGAATACCCTCAGTCTCTAAGAAATACAAAGCCTTC	4991	Hs.532771	GO:0004930|GO:0004984|GO:0004872|GO:0007186|GO:0007186|GO:0006928|GO:0006935|GO:0000060|GO:0050896|GO:0007608|GO:0007338|GO:0005887|GO:0005886	NP_002539	Olfactory receptor, family 1, subfamily D, member 2
ASHG19A3A008688	708.366	321.399	9.3782	8.41705	coding	NM_030576	LIMD2	RefSeq_coding	3232	chr17	-	61773249	61777519		CCAGGTCACCCTGAAGCCCCACAACTTTTTATCTGGATTAGTTATTAAAAAACAATAAAT	80774	Hs.591166	GO:0046872|GO:0008270	NP_085053	LIM domain containing 2
ASHG19A3A017314	213.095	169.488	7.65346	7.48925	coding	NM_182649	PCNA	RefSeq_coding	1319	chr20	-	5095599	5100647		CTTGCGGACGCGGCGGCATTAAACGGTTGCAGGCGTAGCAGAGTGGTCGTTGTCTTTCTA	5111	Hs.147433	GO:0003677|GO:0030337|GO:0032405|GO:0032139|GO:0005515|GO:0000701|GO:0006281|GO:0006281|GO:0006260|GO:0006271|GO:0000082|GO:0000084|GO:0006284|GO:0006287|GO:0008283|GO:0007507|GO:0006886|GO:0006298|GO:0000278|GO:0006289|GO:0006297|GO:0048015|GO:0032077|GO:0006275|GO:0000083|GO:0046686|GO:0033993|GO:0000723|GO:0000722|GO:0032201|GO:0006283|GO:0019985|GO:0005663|GO:0043626|GO:0070557|GO:0000307|GO:…	NP_872590	Proliferating cell nuclear antigen
ASHG19A3A050873	148.823	114.289	7.13578	6.91557	coding	NM_001040276	ESR2	RefSeq_coding	2745	chr14	-	64693752	64805268		GTGCTTGCTCTGCTGGAGGAACCGCGCTCAGGTTACAGTCATCCCAATATGGTTCTGAAG	2100	Hs.660607	GO:0003677|GO:0019899|GO:0030284|GO:0004879|GO:0046872|GO:0005515|GO:0048019|GO:0043565|GO:0003700|GO:0005496|GO:0003707|GO:0003713|GO:0008270|GO:0007267|GO:0030520|GO:0010467|GO:0030308|GO:0009968|GO:0034339|GO:0006355|GO:0007165|GO:0043401|GO:0006351|GO:0005739|GO:0005654|GO:0005634	NP_001428	Estrogen receptor 2 (ER beta)
ASHG19A3A001178	323.826	283.892	8.25214	8.23589	coding	NM_001032284	TMPO	RefSeq_coding	2374	chr12	+	98909408	98942734		CTCAAGCAAAGAAGAGTTGAGCACAATCAGGTGGGAGAAAAAACAGAGGAAAGAAGAGTA	7112	Hs.11355	GO:0003677|GO:0005521|GO:0005515|GO:0000785|GO:0005694|GO:0016021|GO:0016020|GO:0005635|GO:0005635|GO:0005637|GO:0031965|GO:0005634|GO:0005634	NP_003267	Thymopoietin
ASHG19A3A053304	74.9616	76.0049	6.14947	6.32762	coding	NM_000693	ALDH1A3	RefSeq_coding	3510	chr15	+	101420008	101456828		AACTGCTACAACGCCCTCTATGCACAGGCTCCATTTGGTGGCTTTAAAATGTCAGGAAAT	220	Hs.459538	GO:0070403|GO:0004029|GO:0004030|GO:0016491|GO:0042803|GO:0070324|GO:0031076|GO:0048048|GO:0060324|GO:0001822|GO:0021768|GO:0060166|GO:0002072|GO:0055114|GO:0021983|GO:0043065|GO:0042493|GO:0042574|GO:0002138|GO:0042573|GO:0005737	NP_000684	Aldehyde dehydrogenase 1 family, member A3
ASHG19A3A020683	506.132	661.961	8.88582	9.46121	coding	NM_133480	TADA3	RefSeq_coding	2571	chr3	-	9824812	9834420		TTTGATACACACAGAAAATCTGAAAGAATCATACAATAAACATCAGTATATTCTCCACCT	10474	Hs.386390	GO:0004402|GO:0016922|GO:0030374|GO:0005515|GO:0019904|GO:0003700|GO:0003713|GO:0030520|GO:0043966|GO:0010628|GO:0006357|GO:0006351|GO:0005671|GO:0030914|GO:0005622|GO:0005634|GO:0033276	NP_597814	Transcriptional adaptor 3
ASHG19A3A048807	97.114	104.517	6.53033	6.78479	coding	NM_003483	HMGA2	RefSeq_coding	4150	chr12	+	66218239	66360068		CCCATGTGTTTTGATTCCTGCTCTTTGTTACAGTTCCATTAAATGAGTAATAAAGTTTGG	8091	Hs.505924	GO:0003680|GO:0003677|GO:0019899|GO:0005515|GO:0007049|GO:0051301|GO:0006325|GO:0007067|GO:0007275|GO:0046426|GO:0033144|GO:0000122|GO:0051091|GO:0040008|GO:0006355|GO:0007165|GO:0000785|GO:0005634	NP_003475	High mobility group AT-hook 2
ASHG19A3A013073	2214.29	1905.02	11.0199	10.9893	coding	NM_153219	ZNF524	RefSeq_coding	1135	chr19	+	56111729	56114504		CCCCCAGACTAACAGACCCTTGGAGGCAGGGGCTGTGGAAATAAATCTCTGCCTGCTGGC	147807	Hs.440291	GO:0003677|GO:0046872|GO:0008270|GO:0005622|GO:0005634	NP_694951	Zinc finger protein 524
ASHG19A3A001240	19529.2	15861.5	14.1755	14.019	coding	NM_001035247	UFD1L	RefSeq_coding	1730	chr22	-	19437463	19466738		ATTCCCAATTATGAATTTAAACTTGGATGAAGCTGGAGGCAGATTCGTCGCTTTCTCTGG	7353	Hs.474213	GO:0005515|GO:0004843|GO:0001501|GO:0006511|GO:0005737|GO:0005829|GO:0005634	NP_005650	Ubiquitin fusion degradation 1 like (yeast)
ASHG19A3A047821	622.175	603.353	9.18477	9.32734	coding	NM_139137	KCNC2	RefSeq_coding	2468	chr12	-	75436877	75603511		GGCAATGCTCTGAGGCTCTCTCCAGTAACATCACCCTACAACTCTCCTTGTCCTCTGAGG	3747	Hs.27214	GO:0005244|GO:0005249|GO:0006112|GO:0006811|GO:0006813|GO:0050796|GO:0055085|GO:0016021|GO:0016020|GO:0008076	NP_715624	Potassium voltage-gated channel, Shaw-related subfamily, member 2
ASHG19A3A000904	3585.68	4040.57	11.7331	12.0572	coding	NM_001009183	SIP1	RefSeq_coding	1309	chr14	+	39583487	39606175		AAGGTGCTCTGAAGTGAGGCTCTTAGTGGTATTTTGACCAACGTGATTTAGCTGATGAGC	8487	Hs.652307	GO:0005515|GO:0016070|GO:0008380|GO:0000375|GO:0006397|GO:0034660|GO:0000387|GO:0000245|GO:0015030|GO:0005737|GO:0005829|GO:0005829|GO:0005622|GO:0005654|GO:0005634|GO:0005681	NP_003607	Survival of motor neuron protein interacting protein 1
ASHG19A3A046888	235.997	236.948	7.79696	7.96913	coding	NM_014361	CNTN5	RefSeq_coding	4164	chr11	+	98891870	100227472		CTCAGAATTATTATTCCCCCATCAATCTTTATCATTCCTCAGATGCCTTCAAACAAGATG	53942	Hs.656783	GO:0005515|GO:0007155|GO:0031225|GO:0005886	NP_780775	Contactin 5
ASHG19A3A031755	564.324	587.897	9.04236	9.29203	coding	NM_031469	SH3BGRL2	RefSeq_coding	4675	chr6	+	80340999	80413369		TCACAATGTCAGAAGAACAGAGGCAATGGATGTACAAAAACGTCCCCCCGGAAAAGAAAC	83699	Hs.706531	GO:0017124|GO:0005634	NP_113657	SH3 domain binding glutamic acid-rich protein like 2
ASHG19A3A008232	4542.16	4159.47	12.0749	12.0953	coding	NM_007247	SYNRG	RefSeq_coding	8181	chr17	-	35874900	35969486	NM_001163547,NM_001163546,NM_001163544,AK091801,	CGCCTGTATTTTAAAAGATGGTGTGGTTTCTCCCTTGTTTGTATTTTAATAAACAACTGC	11276	Hs.594647	GO:0005509|GO:0006897|GO:0006886|GO:0030121|GO:0005794|GO:0005737|GO:0016020	NP_942583	Synergin, gamma
ASHG19A3A016066	135.092	123.922	6.99442	7.03696	coding	NM_004633	IL1R2	RefSeq_coding	1484	chr2	+	102608305	102644880		TAAATCCCTGCTTTACTGCTGAGCTCCTGCTGGAGGTGAAAGTCTGGCCTGGCAGCCTTC	7850	Hs.25333	GO:0004908|GO:0004910|GO:0004872|GO:0006955|GO:0016021|GO:0005886|GO:0005886	NP_775465	Interleukin 1 receptor, type II
ASHG19A3A005576	586.268	672.24	9.09997	9.48151	coding	NM_033013	NR1I2	RefSeq_coding	4335	chr3	+	119499330	119537331		ACACTACCTTCTCCCATTTCAAGAATTTCCGGGTCTCTCTGCAGCTGCGGGGGGAGGATG	8856	Hs.7303	GO:0008144|GO:0004879|GO:0046872|GO:0005515|GO:0043565|GO:0003700|GO:0003707|GO:0003713|GO:0016564|GO:0008270|GO:0046618|GO:0042738|GO:0010467|GO:0034339|GO:0006355|GO:0007165|GO:0008202|GO:0006805|GO:0042908|GO:0005654|GO:0005634	NP_148934	Nuclear receptor subfamily 1, group I, member 2
ASHG19A3A033364	105.455	75.4754	6.64818	6.31652	coding	NM_002291	LAMB1	RefSeq_coding	5866	chr7	-	107564245	107643804		ATTTCTACCATGATTTACCTTGGAGACCTGCTGAAGGCCGAAACAGCAACGCCTGTAAAA	3912	Hs.650585	GO:0005201|GO:0005198|GO:0007411|GO:0007155|GO:0031175|GO:0042476|GO:0030335|GO:0050679|GO:0034446|GO:0005604|GO:0005604|GO:0005576|GO:0005576|GO:0005615|GO:0005606|GO:0005606|GO:0005606|GO:0043259|GO:0005607|GO:0005607|GO:0043257|GO:0043257|GO:0048471	NP_002282	Laminin, beta 1
ASHG19A3A006015	715.58	800.846	9.39296	9.73393	coding	NM_003693	SCARF1	RefSeq_coding	3457	chr17	-	1537151	1549041	NM_145350,	GTGACCCTGGCTGGCTGGGGCCCAGGTGTGAAGACCCCTGCCCCACTGGTACCTTTGGGG	8578	Hs.647430	GO:0030169|GO:0005044|GO:0004888|GO:0007155|GO:0006707|GO:0016322|GO:0048680|GO:0010976|GO:0006898|GO:0016021|GO:0016020	NP_663327	Scavenger receptor class F, member 1
ASHG19A3A041713	629.627	780.299	9.20125	9.69815	coding	NM_001178115	ZNF185	RefSeq_coding	3248	chrX	+	152110214	152142024		CGCCAGAGGTCGCCCGAGGATCACGAATGGGCCCGAGGAGCTGGCTGCCCCTTCCCCCGC	7739	Hs.16622	GO:0046872|GO:0008270|GO:0030054|GO:0005737|GO:0005856|GO:0005925	NP_009081	Zinc finger protein 185 (LIM domain)
ASHG19A3A010911	1955.24	2034.52	10.8423	11.0805	coding	NM_018664	BATF3	RefSeq_coding	992	chr1	-	212859759	212873327		ATTGTCTCTCCCTTCTCCAGTTCTGGGAATTTACAGGCACAATACACTTCCTTTTCCTGG	55509	Hs.62919	GO:0046983|GO:0043565|GO:0003700|GO:0003714|GO:0006355|GO:0006366|GO:0005634	NP_061134	Basic leucine zipper transcription factor, ATF-like 3
ASHG19A3A036877	467.426	224.008	8.77488	7.88972	coding	NM_022783	DEPDC6	RefSeq_coding	2631	chr8	+	120885899	121063156		TGTCCAACAAGCACCCATTTGTGGACAGCAATCTTCTCTACCAGTTCAGAATGAACTTCC	64798	Hs.112981	GO:0005515|GO:0035556|GO:0032007|GO:0045792|GO:0006469|GO:0042981|GO:0005622	NP_073620	DEP domain containing MTOR-interacting protein
ASHG19A3A011450	158.894	190.226	7.23145	7.65346	coding	NM_003890	FCGBP	RefSeq_coding	16407	chr19	-	40353963	40440533		TTTTCTGGGTCACAGAGGCCAAATGTGAGAGCATTGAATAAATATCTTAAGCTAAGCTGC	8857	Hs.111732	GO:0005515|GO:0005576	NP_003881	Fc fragment of IgG binding protein
ASHG19A3A044430	38486.3	20723.6	15.1842	14.4174	coding	NM_030912	TRIM8	RefSeq_coding	2753	chr10	+	104404251	104418076		TATCTGTCTAGAGCACACACCAAAATCCAACCTTCTAATAAACATGATGGCGCAGTCCCA	81603	Hs.336810	GO:0016874|GO:0046872|GO:0042803|GO:0008270|GO:0008150|GO:0016605|GO:0005737|GO:0043231|GO:0005730|GO:0005634	NP_112174	Tripartite motif-containing 8
ASHG19A3A050466	1148.39	1072.94	10.0811	10.1504	coding	NM_001135589	GDAP2	RefSeq_coding	2553	chr1	-	118419845	118472302		CAAGCTGATTGTTTAACTGTTGCTGATTGCTTATCTTTATATTGTATGAACCAGGGGATA	54834	Hs.594430	GO:0032526	NP_060156	Ganglioside induced differentiation associated protein 2
ASHG19A3A029928	636.27	777.497	9.2166	9.69406	coding	NM_199184	C6orf108	RefSeq_coding	813	chr6	-	43193368	43197211		GGGTAAGGGAGCTGTGAGGGTGTGGATGGGAGGCAGCTTCACCTTTCCCTGCCCTTTCCA	10591	Hs.109752	GO:0070694|GO:0016798|GO:0050144|GO:0008283|GO:0009159|GO:0008152|GO:0009117|GO:0030307|GO:0005737|GO:0005730|GO:0005634|GO:0005634	NP_954653	Chromosome 6 open reading frame 108
ASHG19A3A006837	501.369	505.303	8.87284	9.07851	coding	NM_199004	ARRB2	RefSeq_coding	1891	chr17	+	4613788	4624794		ATCACCTGGACAAAGTGGACCCTGTAGTGTTTGTGACCCTCACCTGCGCCTTCCGCTATG	409	Hs.435811	GO:0001664|GO:0031701|GO:0005515|GO:0005102|GO:0031625|GO:0002031|GO:0002031|GO:0007596|GO:0060326|GO:0002032|GO:0032088|GO:0045953|GO:0031397|GO:0009968|GO:0030168|GO:0070374|GO:0070374|GO:0043161|GO:0015031|GO:0016567|GO:0031623|GO:0006366|GO:0007179|GO:0005905|GO:0005737|GO:0016023|GO:0031410|GO:0005829|GO:0005634|GO:0005886	NP_945355	Arrestin, beta 2
ASHG19A3A043058	299.499	167.389	8.14062	7.4717	coding	NM_015045	WAPAL	RefSeq_coding	6302	chr10	-	88195013	88281541		AATGCACCTGAGAGCACATGGGATGGTAGCAATGGTCTTTAAAACCTTGGATGATTCCCA	23063	Hs.203099	GO:0005515|GO:0007049|GO:0051301|GO:0044419|GO:0007067|GO:0008156|GO:0035562|GO:0045875|GO:0071168|GO:0071922|GO:0009636|GO:0000785|GO:0005694|GO:0008278|GO:0005737|GO:0005634|GO:0000795	NP_055860	Wings apart-like homolog (Drosophila)
ASHG19A3A016200	145.326	217.109	7.09903	7.84879	coding	NM_198581	ZC3H6	RefSeq_coding	11557	chr2	+	113033177	113097640		TTACTCAGAGATACCAAGAAGATGAAGAACAAACCAGCACCCAACCTCATAGGGCACCAA	376940	Hs.190477	GO:0046872|GO:0003674|GO:0003676|GO:0008270|GO:0008150|GO:0005575	NP_940983	Zinc finger CCCH-type containing 6
ASHG19A3A031781	670.099	637.206	9.29611	9.40582	coding	NM_014847	UBAP2L	RefSeq_coding	4006	chr1	+	154193324	154243328		TCCTTTGAGAAACAAGGTTTTCATTCCGGTACTCCTGCTGCTTCCTTCAACTTGCCTTCA	9898	Hs.490551	GO:0005515|GO:0007339|GO:0005671	NP_055662	Ubiquitin associated protein 2-like
ASHG19A3A053950	6527.98	5926.18	12.59	12.6163	coding	NM_006324	CFDP1	RefSeq_coding	1281	chr16	-	75327608	75467387		TTTGGGGAAAATTGGTGCCAAGAAGCAGAAAATGAGCACCCTTGAGAAGTCCAAACTGGA	10428	Hs.461361	GO:0003674|GO:0006916|GO:0008150|GO:0007155|GO:0007275|GO:0042127|GO:0008360|GO:0005575	NP_006315	Craniofacial development protein 1
ASHG19A3A010052	6610.25	4745.38	12.6073	12.2919	coding	NM_001080519	BAHCC1	RefSeq_coding	10342	chr17	+	79373539	79433358		TAACGTGACGAAGGCACGATTCCTGTAAATGTGTAAACTAAGGGGATGGTTGGATTTTTT	57597	Hs.514580	GO:0003677	NP_001073988	BAH domain and coiled-coil containing 1
ASHG19A3A039306	20993.1	15638.3	14.2748	14.0009	coding	NM_032809	FAM73B	RefSeq_coding	3597	chr9	+	131799252	131834350		TTCGACTTTTGGATGGTAGAGTGTGTGCACTGACTGTGAGTCGAATAAACAATTGAGACG	84895	Hs.632693	GO:0016021|GO:0016020	NP_116198	Family with sequence similarity 73, member B
CUST_50_PI426249100	394.955	426.607	8.53569	8.83204	coding	NM_021192_Exon1+	NM_021192	HOX cluster	781	chr2	+	176972083	176972864	NM_021192,	GTCTGACTTCGCTAGCAAGCCTTCGTTCCTTTCCCAACCGTCGTCCTGCCAGATGACTTT
ASHG19A3A006131	79.491	78.3542	6.23367	6.37093	coding	NM_001172690	ZNF573	RefSeq_coding	2257	chr19	-	38229202	38270230	NM_152360,	GAGAACTATAGAAACCTGGTATCACTGGGAGGACATTCCATTTCTAAACCAGTTGTGGTT	126231	Hs.531262	GO:0003677|GO:0046872|GO:0008270|GO:0006355|GO:0005622|GO:0005634	NP_689573	Zinc finger protein 573
ASHG19A3A023645	330.967	408.466	8.28317	8.76899	coding	NM_004953	EIF4G1	RefSeq_coding	4888	chr3	+	184038262	184053145		GGCAGGGTGGAGAGGTGGGCTCTTCCTGCTTCCCACTCATCTTATAGCTTTCTTTCCCCA	1981	Hs.433750	GO:0005515|GO:0008135|GO:0003743|GO:0016070|GO:0044267|GO:0010467|GO:0008286|GO:0044419|GO:0016071|GO:0000288|GO:0000289|GO:0006446|GO:0006446|GO:0006412|GO:0006413|GO:0005737|GO:0005829|GO:0005829|GO:0016281	NP_937887	Eukaryotic translation initiation factor 4 gamma, 1
ASHG19A3A001683	4039.7	2867.89	11.9037	11.5685	coding	NM_001098533	CDK10	RefSeq_coding	1759	chr16	+	89753075	89762771		TGCGCCTGCTGCACTTCCTGTTCATGGCGACGGCCGGGGACTGCCTGGAGAGCTCCTATT	8558	Hs.699177	GO:0005524|GO:0004693|GO:0000166|GO:0005515|GO:0016740|GO:0008285|GO:0006468|GO:0007089	NP_443714	Cyclin-dependent kinase 10
ASHG19A3A050897	3524.43	1839.87	11.7101	10.938	coding	NM_182526	TMEM229B	RefSeq_coding	4068	chr14	-	67936983	67982021		CCTCTGTCTCTTCCTTTTCACATTTGTGCACATAAAATATACTGGTGTTTGTGTTCCAGG	161145	Hs.509707	GO:0016021|GO:0016020	NP_872332	Transmembrane protein 229B
ASHG19A3A051024	1177.25	1040.23	10.1199	10.1048	coding	NM_015859	GTF2A1	RefSeq_coding	1736	chr14	-	81646393	81687294		TTATCTTGTTTTCTTGGGGTTGCCCCCTCTTGTTTGTGTTGTGTGTGGAAATGGCGAACT	2957	Hs.592334	GO:0003677|GO:0003702|GO:0017025|GO:0016251|GO:0016251|GO:0005515|GO:0046982|GO:0003713|GO:0008134|GO:0010467|GO:0032568|GO:0006368|GO:0006366|GO:0006367|GO:0006367|GO:0016032|GO:0005737|GO:0005730|GO:0005654|GO:0005654|GO:0005634|GO:0005672	NP_963889	General transcription factor IIA, 1, 19/37kDa
ASHG19A3A001902	94.7348	107.523	6.49362	6.82812	coding	NM_001114136	EPB49	RefSeq_coding	2561	chr8	+	21912327	21940035		TGCCCCACGCCCTGGGCCCTTGAAGGGCTCTGCGAGTGACCCGGCGGGCGAGCTCCGTGC	2039	Hs.106124	GO:0003779|GO:0051017|GO:0051693|GO:0007010|GO:0015629|GO:0005737|GO:0005634	NP_001969	Erythrocyte membrane protein band 4.9 (dematin)
ASHG19A3A015784	81267.3	80716.8	16.3116	16.3025	coding	NM_006196	PCBP1	RefSeq_coding	1772	chr2	+	70314584	70316332		CTGTTCAGCTGTTAATGCTGGGATCCATATTTAGTTTTATAAGCTTTTCCCTGTTTTTAG	5093	Hs.2853	GO:0003677|GO:0003723|GO:0005515|GO:0003697|GO:0008380|GO:0010467|GO:0016071|GO:0000398|GO:0005737|GO:0005654|GO:0005634|GO:0030529	NP_006187	Poly(rC) binding protein 1
CUST_7_PI418767722	140941	155639	17.1383	17.2064	coding	NM_001101	ACTB	RefSeq_coding	1852	chr7	-	5566782	5570232		AGGGCTTACCTGTACACTGACTTGAGACCAGTTGAATAAAAGTGCACACCTTAAAAATGA	60	Hs.520640	GO:0005524|GO:0019894|GO:0050998|GO:0000166|GO:0005515|GO:0019901|GO:0005200|GO:0051084|GO:0034332|GO:0007411|GO:0007596|GO:0034329|GO:0045216|GO:0006928|GO:0044267|GO:0006457|GO:0070688|GO:0035267|GO:0030424|GO:0005737|GO:0005856|GO:0005829|GO:0005829|GO:0043234|GO:0030529	NP_001092	Actin, beta
ASHG19A3A026861	2038.55	2189.37	10.9024	11.1885	coding	NM_001080540	ISCA1P1	RefSeq_coding	1881	chr5	-	62071201	62073170		CAAAACACACCAAAACCTAGAGCAATAGCTTTATGCAAATGCTCATGAGTTTGTATCAAT
ASHG19A3A046464	75841.9	83338.2	16.2085	16.3422	coding	NM_002353	TACSTD2	RefSeq_coding	2080	chr1	-	59041096	59043166		CTTCAGCTTGCCCTTACTGCCACTGATATTGGTAATGTTCTTTTTTGTAAAATGTTTGTA	4070	Hs.23582	GO:0004872|GO:0008283|GO:0007166|GO:0050896|GO:0007601|GO:0005829|GO:0005887|GO:0016020	NP_002344	Tumor-associated calcium signal transducer 2
ASHG19A3A018001	1255.64	998.887	10.2059	10.0491	coding	NM_020746	MAVS	RefSeq_coding	11760	chr20	+	3827448	3856761		AATTTTTGCAATGTGGATGTTGTAGAGATTCTGCCTTACCTGCCCTGCCTCACAGCAAGA	57506	Hs.570362	GO:0050700|GO:0005515|GO:0019901|GO:0004871|GO:0002218|GO:0071360|GO:0042742|GO:0045087|GO:0044419|GO:0032480|GO:0043123|GO:0071660|GO:0071651|GO:0002230|GO:0002230|GO:0010552|GO:0032727|GO:0032727|GO:0032728|GO:0032728|GO:0032757|GO:0033160|GO:0001934|GO:0051091|GO:0042993|GO:0032760|GO:0060340|GO:0009615|GO:0007165|GO:0016021|GO:0016020|GO:0005741|GO:0005741|GO:0005741|GO:0005739	NP_065797	Mitochondrial antiviral signaling protein
ASHG19A3A001864	404.496	170.204	8.56861	7.49484	coding	NM_001110215	CENPM	RefSeq_coding	558	chr22	-	42334748	42336223		GTGGGACTTGCCTGGTGTGCTCAAGGTGGAAGGCTTTAGGGCCACCATGGCGCAGCGCCT	79019	Hs.208912	GO:0000087|GO:0000278|GO:0000236|GO:0000777|GO:0005737|GO:0005829|GO:0005634	NP_076958	Centromere protein M
ASHG19A3A012824	170.762	1751.25	7.33165	10.8659	coding	NM_198541	IGFL1	RefSeq_coding	771	chr19	+	46733008	46734498		CATCTCAAGTTCTCTTCTATCCAGGAGCAAAGCACAGGATCATAATAAATTTATGTACTT	374918	Hs.546554	GO:0005576	NP_940943	IGF-like family member 1
ASHG19A3A034963	279.706	256.938	8.04312	8.08972	coding	NM_015172	BAT2L2	RefSeq_coding	10394	chr1	+	171454665	171562649		TTAAGCTGTATGCCTTCCCTTATTGCCCAGCAGCAACAGAATCCGCAAGTTTATGTGTCT	23215	Hs.494614	GO:0008022	NP_055987	Proline-rich coiled-coil 2C
ASHG19A3A000790	685.713	674.008	9.33194	9.48447	coding	NM_001005354	PRR13	RefSeq_coding	1113	chr12	+	53835432	53840426		CTAAACATGTGGAATCCCAATGCCGGTGGGCCCCCTCATCCTGTGCCACAGCCAGGGTAT	54458	Hs.728833	GO:0005634	NP_060927	Proline rich 13
ASHG19A3A020486	9475.66	6891.01	13.1381	12.8285	coding	NM_000026	ADSL	RefSeq_coding	1565	chr22	+	40742503	40762573		TTCAGTCCCATTCACTCCCAGTTGGATCATTTACTGGATCCTTCTTCTTTCACTGGTCGT	158	Hs.75527	GO:0070626|GO:0004018|GO:0004018|GO:0004018|GO:0004018|GO:0016829|GO:0006167|GO:0055086|GO:0051262|GO:0006144|GO:0006164|GO:0009168|GO:0005737|GO:0005829|GO:0005829|GO:0005739	NP_001116850	Adenylosuccinate lyase
ASHG19A3A024466	1835.1	940.22	10.7554	9.95915	coding	NM_016245	HSD17B11	RefSeq_coding	1892	chr4	-	88257690	88312455		AAGGCATTTCTTCCTGCAATGACGAAGAATAACCATGGCCATATTGTCACTGTGGCTTCG	51170	Hs.594923	GO:0005488|GO:0004303|GO:0016229|GO:0006710|GO:0055114|GO:0006694|GO:0005737|GO:0005576	NP_057329	Hydroxysteroid (17-beta) dehydrogenase 11
ASHG19A3A035654	131.346	84.6935	6.9571	6.47925	coding	NM_018250	INTS9	RefSeq_coding	2764	chr8	-	28625175	28747698	NM_001172562,	CTAAAGGAGTGCTCGGGTCATGTATTTGTGGATTCTGTGCCGGAATTCTGTTTACCAGAG	55756	Hs.162397	GO:0005515|GO:0016180|GO:0032039|GO:0005634	NP_060720	Integrator complex subunit 9
ASHG19A3A045236	191.489	183.418	7.49708	7.60338	coding	NM_022349	MS4A6A	RefSeq_coding	1432	chr11	-	59939972	59950674		TATGCTCTGCATTTGCCCCTGGTGATCTTAAAATTCGTTTGCCTTTTTAAAGCTATATTA	64231	Hs.523702	GO:0004872|GO:0016021|GO:0016020	NP_690591	Membrane-spanning 4-domains, subfamily A, member 6A
ASHG19A3A033678	14075	14073.1	13.7078	13.8493	coding	NM_014690	FAM131B	RefSeq_coding	4285	chr7	-	143050493	143059173		TCTCTCCCTCTCCGTTGCCTTTTACTGTCGTTCCTGCCTCCTCCGATTCGCTTTGTTCAC	9715	Hs.648908		NP_055505	Family with sequence similarity 131, member B
CUST_17_PI426249100	9180.54	6232.6	13.0927	12.6825	coding	NM_014620_Exon2+	NM_014620	HOX cluster	117	chr12	+	54446943	54447060	NM_014620,	AGAAATGACGTCAGAATCATTTGCATCCCGCTGCCTCTACCTGCCTGGTCCAGCTGGGAC
ASHG19A3A005801	131.886	109.486	6.96254	6.85321	coding	NM_133331	WHSC1	RefSeq_coding	7706	chr4	+	1894508	1983928		TAGAACCACTGGTAACTCTTAACTGCTGTCTGCTTTTCTGTGGAGACTGCGGGTTGCAGA	7468	Hs.113876	GO:0003677|GO:0003682|GO:0018024|GO:0046872|GO:0008168|GO:0016740|GO:0008270|GO:0009653|GO:0003289|GO:0003290|GO:0060348|GO:0016568|GO:0003149|GO:0000122|GO:0005694|GO:0005737|GO:0031965|GO:0005730|GO:0005634	NP_579890	Wolf-Hirschhorn syndrome candidate 1
ASHG19A3A048105	1686.18	1120.33	10.639	10.2187	coding	NM_139015	SPPL3	RefSeq_coding	3432	chr12	-	121201035	121342151		ATGCCTGGTCTCCTACTATGCTTTGTCCTTCGCTATGACAACTACAAAAAGCAAGCCAGT	121665	Hs.507087	GO:0004190|GO:0008233|GO:0043523|GO:0016021|GO:0016020	NP_620584	Signal peptide peptidase 3
ASHG19A3A051096	329.674	328.302	8.27833	8.44866	coding	NM_000295	SERPINA1	RefSeq_coding	3220	chr14	-	94843084	94855153		GTGGACTTAGCCCCTGTTTGCTCCTCCGATAACTGGGGTGACCTTGGTTAATATTCACCA	5265	Hs.525557	GO:0002020|GO:0005515|GO:0004867|GO:0004867|GO:0006953|GO:0007596|GO:0006954|GO:0010951|GO:0030168|GO:0002576|GO:0030162|GO:0046687|GO:0034097|GO:0032355|GO:0001666|GO:0010288|GO:0032496|GO:0033986|GO:0014070|GO:0034014|GO:0005576|GO:0005576|GO:0005615|GO:0031093|GO:0005578	NP_001121179	Serpin peptidase inhibitor, clade A (alpha-1 antiproteinase, antitrypsin), member 1
ASHG19A3A040648	278.997	251.451	8.03949	8.0587	coding	NM_003918	GYG2	RefSeq_coding	3411	chrX	+	2746862	2800861	NM_001079855,	AGCTTGTCCTGAAACTGAGACTCCTGCCGTGATAACGTGTGACCCACTGTCCCAGCCTTC	8908	Hs.567381	GO:0008466|GO:0016757|GO:0005975|GO:0006006|GO:0005978|GO:0005980|GO:0005829|GO:0005829|GO:0005625	NP_003909	Glycogenin 2
ASHG19A3A034598	838.873	721.846	9.62053	9.58276	coding	NM_199344	SFT2D2	RefSeq_coding	880	chr1	+	168195254	168212087		GTGAAACAGCTGAAGCGAATGTTTGAGCCTACTCGTTTGATTGCAACTATCATGGTGCTG	375035	Hs.645435	GO:0015031|GO:0016192|GO:0016021|GO:0016020	NP_955376	SFT2 domain containing 2
ASHG19A3A041452	113.208	133.405	6.74799	7.14105	coding	NM_173798	ZCCHC12	RefSeq_coding	2212	chrX	+	117957786	117960930		CAACCCTTTGATGAGTGATATTTCCCTATACCTATGTACCCAGATAGATATATGCATAGA	170261	Hs.21417	GO:0046872|GO:0003676|GO:0008270	NP_776159	Zinc finger, CCHC domain containing 12
ASHG19A3A054108	150.998	75.3354	7.15648	6.31386	coding	NM_006849	PDIA2	RefSeq_coding	1726	chr16	+	333117	337209		TGGGCAAGAATTTTGAGCAGGTGGCTTTTGACGAAACCAAGAATGTGTTTGTCAAGTTCT	64714	Hs.66581	GO:0009055|GO:0016853|GO:0005515|GO:0003756|GO:0015035|GO:0005496|GO:0006915|GO:0045454|GO:0006662|GO:0006457|GO:0006621|GO:0001666|GO:0005783|GO:0005788	NP_006840	Protein disulfide isomerase family A, member 2
ASHG19A3A022622	238.133	180.816	7.80957	7.58193	coding	NM_001640	APEH	RefSeq_coding	2775	chr3	+	49711434	49720933		TGTGTTTTATGAAGACTGGGGAGAAAACATGGTTTCCAAAAGCATCCCTGTGCTCTGCGT	327	Hs.517969	GO:0016787|GO:0004252|GO:0006508|GO:0005737|GO:0031965	NP_001631	N-acylaminoacyl-peptide hydrolase
ASHG19A3A054633	72.6291	80.3079	6.10183	6.40366	coding	NM_177398	LMX1A	RefSeq_coding	3555	chr1	-	165171104	165325952		TTCCAGCAGCGCTCCGCAACTTCTCTCTGCTCCAGTCACTGGGAGAGAGCTCGCCTACCA	4009	Hs.667312	GO:0046872|GO:0043565|GO:0003700|GO:0030528|GO:0008270|GO:0007411|GO:0021953|GO:0021549|GO:0021542|GO:0007275|GO:0045665|GO:0001558|GO:0006355|GO:0005634	NP_796372	LIM homeobox transcription factor 1, alpha
ASHG19A3A006574	121.071	92.6564	6.83988	6.60512	coding	NM_181702	GEM	RefSeq_coding	2080	chr8	-	95261486	95274547		GCCCCGACGCCGATCCGGCCGAGCCAAGACTCAACGATGACTCTGAATAATGTCACCATG	2669	Hs.654463	GO:0019003|GO:0005525|GO:0003924|GO:0005516|GO:0000287|GO:0000166|GO:0005515|GO:0006184|GO:0007166|GO:0006955|GO:0007165|GO:0007264|GO:0009898|GO:0005886	NP_859053	GTP binding protein overexpressed in skeletal muscle
ASHG19A3A050758	431.81	658.544	8.66221	9.45407	coding	NM_001012706	C14orf182	RefSeq_coding	2686	chr14	-	50448429	50474238		AAGAATTGTGCCATGAAAAATGGAAAACTCCTGAGAAGCTGTTCCAGCGTCAGGAGAGCA	283551	Hs.660867		NP_001012724	Chromosome 14 open reading frame 182
ASHG19A3A002558	398.333	351.452	8.54695	8.54833	coding	NM_001142540	SLC35B3	RefSeq_coding	2086	chr6	-	8413301	8435794		AAGGAGCGTTCGAGGAATGGATGAGGCCATGATTGATTCCGGAGCGCAGTTAATCAAGGC	51000	Hs.285847	GO:0055085|GO:0005794|GO:0000139|GO:0016021|GO:0016020|GO:0005739	NP_057032	Solute carrier family 35, member B3
ASHG19A3A022526	196.856	190.603	7.5368	7.65597	coding	NM_001029839	C3orf23	RefSeq_coding	2203	chr3	+	44379943	44401288	NM_001029840,	AAATGTATAGAAAAATCAAGCTTAGTAATACTTTAATATTATTCTACCAATGTATTTTTT	285343	Hs.55131	GO:0005739	NP_776187	Chromosome 3 open reading frame 23
ASHG19A3A018608	669.88	490.161	9.29547	9.03472	coding	NM_001033515	LOC100132288	RefSeq_coding	1640	chr21	-	9907193	9968585		TGGTAGGATCCTTTCATGGCGTCTTCCCAGGACCTCCTGCCAGCTCCCATTGGGAGTTTT	100132288	Hs.487562	GO:0000226|GO:0005874	NP_001028687	Hypothetical protein LOC100132288
ASHG19A3A038902	700.073	322.674	9.36226	8.4238	coding	NM_145283	NXNL2	RefSeq_coding	1476	chr9	+	91150015	91190703		ATTGCTGTGAATTACGTGAGGGAAAGATATTGAAGAGGAGTTGGACACTCCGAGAGTGCA	158046	Hs.494395		NP_660326	Nucleoredoxin-like 2
ASHG19A3A004634	86.2928	102.105	6.3512	6.74915	coding	NM_012174	FBXW8	RefSeq_coding	4673	chr12	+	117348760	117468953		CGAGAGGCGGGCTCGGCGGCCGGAGAATGAAATGAATGATGTGCCTTTCTTTGATATCCA	26259	Hs.696428	GO:0005515|GO:0060716|GO:0060712|GO:0019005	NP_699179	F-box and WD repeat domain containing 8
ASHG19A3A001931	1140.54	807.331	10.0692	9.7452	coding	NM_001118890	GLRX	RefSeq_coding	1093	chr5	-	95149553	95158577	ENST00000309178,	GATTGGAGCTCTGCAGTAACCACAGATCTCATAGGAAATGTTCAACAATTCTGTGAAAGG	2745	Hs.28988	GO:0009055|GO:0015038|GO:0047485|GO:0015035|GO:0045454|GO:0022900|GO:0015949|GO:0055086|GO:0006810|GO:0005737|GO:0005829|GO:0005829	NP_002055	Glutaredoxin (thioltransferase)
ASHG19A3A049953	6507.1	9519.52	12.5853	13.2848	coding	NM_001135816	PCOTH	RefSeq_coding	701	chr13	+	24463591	24466241		AGCGTCGCTCCCCCTCGCCTTCTCGGCCGCCCTCCCGGTTTACCGCCCCCTGTGTCCAGA	542767	Hs.642624	GO:0005737	NP_001129288	Prostate collagen triple helix
ASHG19A3A010032	90.4654	120.187	6.42341	6.9923	coding	NM_024110	CARD14	RefSeq_coding	3917	chr17	+	78152280	78182851		TGGTCCGCATCGTCAGTATGGACAAAGCCAAGGCCAGCCCTCTGCGTTTGTCCTTTGACA	79092	Hs.696253	GO:0050700|GO:0007250|GO:0001934|GO:0042981|GO:0016235|GO:0005737|GO:0005622|GO:0005886	NP_438170	Caspase recruitment domain family, member 14
ASHG19A3A029876	991.264	1087.88	9.86972	10.1722	coding	NM_020737	LRFN2	RefSeq_coding	3144	chr6	-	40359372	40555126		TTTCCCCCCTTCTTCTTGCTAAATGCCATGGATATAACTGAATAAGCGGCTCAGGGCTTT	57497	Hs.250015	GO:0030054|GO:0016021|GO:0005886|GO:0045211|GO:0045202	NP_065788	Leucine rich repeat and fibronectin type III domain containing 2
ASHG19A3A012754	3506.87	3785.27	11.7031	11.9641	coding	NM_174945	ZNF575	RefSeq_coding	1717	chr19	+	44037339	44040282		AAACCATGGACGTGGAGCTGTGGTTTGACAGCGCTGGCTCTGCTTCTCCCCACACACTTA	284346	Hs.213534	GO:0003677|GO:0046872|GO:0008270|GO:0005622|GO:0005634	NP_777605	Zinc finger protein 575
ASHG19A3A049410	2283.59	1675.54	11.0669	10.7959	coding	NM_014887	N4BP2L2	RefSeq_coding	2860	chr13	-	33091030	33112932		GCAGAAGTTACTTATTCTTTTAAGAGGTCTGCCTGGTTCTGGGAAAACAACATTGTCTCG	10443	Hs.507680	GO:0005524|GO:0003674|GO:0008150|GO:0001906|GO:0005575	NP_149102	NEDD4 binding protein 2-like 2
ASHG19A3A005956	161.432	176.842	7.25381	7.55251	coding	NM_139353	TAF1C	RefSeq_coding	3741	chr16	-	84211461	84220662		TGGTGACATGCACCGTCCAGGGAGAAACTCTGCTGGCCGTCCGCTCTGACTACCACTGTG	9013	Hs.153022	GO:0003677|GO:0003701|GO:0016251|GO:0006363|GO:0006362|GO:0006360|GO:0006366|GO:0006361|GO:0005654|GO:0005654|GO:0005634	NP_647610	TATA box binding protein (TBP)-associated factor, RNA polymerase I, C, 110kDa
ASHG19A3A022092	212.55	335.629	7.65042	8.47959	coding	NM_021032	FGF12	RefSeq_coding	3672	chr3	-	191859683	192126838		TACATCTGGATTTTCACACATTTTGTCGCCACTGCCCAGACTTTGACTAACCTTGTGAGC	2257	Hs.390250	GO:0005104|GO:0008083|GO:0008201|GO:0007254|GO:0007267|GO:0008543|GO:0007507|GO:0007399|GO:0007165|GO:0005615|GO:0005634	NP_066360	Fibroblast growth factor 12
ASHG19A3A015912	11117.4	8736.45	13.3648	13.1682	coding	NM_016494	RNF181	RefSeq_coding	716	chr2	+	85822836	85824831		TTTTGGAATTTGAGGAGGAGGAGACTGCCATTGAGATGCCTTGCCATCACCTTTTCCATT	51255	Hs.356187	GO:0016874|GO:0046872|GO:0008270	NP_057578	Ring finger protein 181
ASHG19A3A016109	473.416	388.918	8.79273	8.69591	coding	NM_001080830	PRAMEF12	RefSeq_coding	1786	chr1	+	12834983	12838046		CCATGTCTCTGCCTGCATTCCCCTAGACAGGAAGGAGCAGTTTGTCATCCAGTTCACCTC	390999	Hs.156406		NP_001074299	PRAME family member 12
ASHG19A3A004442	905.947	575.323	9.73453	9.26067	coding	NM_005834	TIMM17B	RefSeq_coding	967	chrX	-	48750730	48755426		TCAAGGGTTTCCGCAATGCCCCTGTTGGAATTCGGCACCGGTTGAGAGGTAGTGCCAATG	10245	Hs.30570	GO:0015450|GO:0008565|GO:0006886|GO:0006626|GO:0055085|GO:0016021|GO:0016020|GO:0015630|GO:0005744|GO:0005739	NP_005825	Translocase of inner mitochondrial membrane 17 homolog B (yeast)
ASHG19A3A046545	280.788	286.222	8.04935	8.24836	coding	NM_000932	PLCB3	RefSeq_coding	3705	chr11	+	64019121	64035027		TTCAAGCTGGCTATGAACATCCTGGCTCAGAACGCCTCCCGGAACACCTTCCTGCGCAAA	5331	Hs.523761	GO:0005509|GO:0005516|GO:0016787|GO:0004435|GO:0004629|GO:0004871|GO:0007186|GO:0035556|GO:0016042|GO:0006892|GO:0007268|GO:0005829|GO:0005829|GO:0016020|GO:0042383	NP_001171812	Phospholipase C, beta 3 (phosphatidylinositol-specific)
ASHG19A3A054269	273.633	261.681	8.01311	8.11765	coding	NM_001142334	A2BP1	RefSeq_coding	4007	chr16	+	6823809	7763340		CATGGTTCTCATGGTCCTCCCGTTTTCAACTGAACCTGTAATTAGCTCCTCAGAGACCAG	54715	Hs.459842	GO:0003723|GO:0000166|GO:0008022|GO:0005515|GO:0008380|GO:0050658|GO:0006397|GO:0005737|GO:0005634|GO:0005802	NP_665900	RNA binding protein, fox-1 homolog (C. elegans) 1
ASHG19A3A018793	4390.4	4359.28	12.0261	12.164	coding	NM_018053	XKR8	RefSeq_coding	2179	chr1	+	28286503	28294604		GGTCTCTACAAGTGACAGATGTGTTGTTTTCAACAGTATTATTAGGTTATGAATAAAGCC	55113	Hs.55024	GO:0016021|GO:0016020	NP_060523	XK, Kell blood group complex subunit-related family, member 8
ASHG19A3A012545	1197.14	672.548	10.142	9.48197	coding	NM_001136008	FXYD3	RefSeq_coding	778	chr19	+	35606731	35614107		AAGATTTCCAGGTTTATTGTTTCTAGCTGGTAATCCCCAGGGGGCCCCAAATCCTGAAAT	5349	Hs.301350	GO:0051117|GO:0005254|GO:0005216|GO:0006821|GO:0006811|GO:0034707|GO:0005789|GO:0005887|GO:0016020|GO:0005792	NP_068710	FXYD domain containing ion transport regulator 3
ASHG19A3A040207	247.356	166.84	7.86552	7.46758	coding	NM_001990	EYA3	RefSeq_coding	2045	chr1	-	28300818	28415131		TCAGTGATCAGAAGCCTGAAACATCAAGCCTTGCTTCAAACCTTCCCATGTCAGAGGAAA	2140	Hs.185774	GO:0003682|GO:0016787|GO:0046872|GO:0005515|GO:0004725|GO:0008138|GO:0009653|GO:0016568|GO:0006302|GO:0016576|GO:0007275|GO:0045739|GO:0010212|GO:0007601|GO:0005737|GO:0005634|GO:0005667	NP_001981	Eyes absent homolog 3 (Drosophila)
ASHG19A3A031167	363.604	166.945	8.41738	7.46847	coding	NM_003447	ZNF165	RefSeq_coding	2411	chr6	+	28048481	28057338		ACTTAATGTCAAGTTACAGCCAGTGGAGACCAAGGCCCATTTTGATTCATCAGAACCCCA	7718	Hs.535177	GO:0003677|GO:0046872|GO:0005515|GO:0003700|GO:0008270|GO:0006355|GO:0006351|GO:0016032|GO:0005622|GO:0005634	NP_003438	Zinc finger protein 165
ASHG19A3A021567	10953	5949.42	13.3485	12.6237	coding	NM_001127192	CNBP	RefSeq_coding	3399	chr3	-	128886658	128902810		ATTTGTTATCGCTGTGGTGAGTCTGGTCATCTTGCCAAGGATTGTGATCTTCAGGAGGAT	7555	Hs.518249	GO:0003677|GO:0046872|GO:0005515|GO:0003700|GO:0008270|GO:0006695|GO:0006355|GO:0006351|GO:0005737|GO:0005783	NP_003409	CCHC-type zinc finger, nucleic acid binding protein
ASHG19A3A011044	135.94	85.7684	7.00431	6.49462	coding	NM_182513	SPC24	RefSeq_coding	654	chr19	-	11257830	11266484		ACCACCAAGTTAGTAAAATTGAGTGGGATTATGAGTGTGAGCCAGGGATGGTCAAAGGCA	147841	Hs.381225	GO:0005515|GO:0000087|GO:0051301|GO:0000278|GO:0000236|GO:0031262|GO:0000777|GO:0005829|GO:0005634	NP_872319	SPC24, NDC80 kinetochore complex component, homolog (S. cerevisiae)
ASHG19A3A043644	240.063	317.06	7.82127	8.39823	coding	NM_001080836	MEIG1	RefSeq_coding	638	chr10	+	15001437	15014850		TGCTAATCACCTTGTCCTGTTCTAAGAACTGGCTGCAGATGCATTAAAGTTGTACTTTCT	644890	Hs.257249	GO:0005634	NP_001074305	Meiosis expressed gene 1 homolog (mouse)
ASHG19A3A047915	217.231	150.844	7.6806	7.32181	coding	NM_002595	CDK17	RefSeq_coding	4133	chr12	-	96672041	96794305		CTAGAGGTGTTATTGTTTTCTGTTTGTGCCAATCATTTGCTTAGTAATTTCTGCTGGGTT	5128	Hs.506415	GO:0005524|GO:0004693|GO:0000166|GO:0004672|GO:0006468	NP_002586	Cyclin-dependent kinase 17
ASHG19A3A037918	74.2153	78.7747	6.13473	6.37776	coding	NM_001114309	ELF3	RefSeq_coding	3263	chr1	+	201979689	201986306		GTCCAGAGGATTTGCAGTTCTGAACCTGCACACTCCAGTCTAGGATCTCCGAGCAAGAGC	1999	Hs.67928	GO:0005515|GO:0043565|GO:0003700|GO:0016563|GO:0003713|GO:0016564|GO:0009653|GO:0001824|GO:0009790|GO:0008544|GO:0030855|GO:0030198|GO:0006954|GO:0060056|GO:0007275|GO:0010552|GO:0006355|GO:0006366|GO:0006351|GO:0005794|GO:0005737|GO:0005730|GO:0005634|GO:0005634	NP_004424	E74-like factor 3 (ets domain transcription factor, epithelial-specific )
ASHG19A3A034665	813.305	472.192	9.58055	8.97651	coding	NM_006716	DBF4	RefSeq_coding	3923	chr7	+	87505543	87538856		GCTTTTTAACACCTTTGTTTTTCATACCAGTACCTGAAGTAGGCTCAATAAAAGAGTCTT	10926	Hs.485380	GO:0008047|GO:0046872|GO:0003676|GO:0005515|GO:0008270|GO:0006260|GO:0000082|GO:0000216|GO:0000075|GO:0000278|GO:0005622|GO:0005654|GO:0005654|GO:0005634	NP_006707	DBF4 homolog (S. cerevisiae)
ASHG19A3A049921	1645.76	823.443	10.597	9.77684	coding	NM_024026	MRP63	RefSeq_coding	2671	chr13	+	21750371	21753218		ACCACTATTGACTGGGAAGACACACAAAGAACTTTGTCAAAGTTGTATGGCTGAGGCCCA	78988	Hs.458367	GO:0003735|GO:0006412|GO:0005761|GO:0005739|GO:0005840	NP_076931	Mitochondrial ribosomal protein 63
ASHG19A3A027444	2822.3	2457.15	11.373	11.35	coding	NM_006805	HNRNPA0	RefSeq_coding	2983	chr5	-	137087074	137090039		ACTTACATGTTGACGTTGAAGGCTCAAAGCTATACTAAGAAGCTTTCTGAAAGATTGGGC	10949	Hs.96996	GO:0003723|GO:0000166|GO:0008380|GO:0010467|GO:0006397|GO:0000398|GO:0030530|GO:0005654|GO:0005634	NP_006796	Heterogeneous nuclear ribonucleoprotein A0
ASHG19A3A003960	4055.52	4535.3	11.9073	12.2224	coding	NM_001895	CSNK2A1	RefSeq_coding	2732	chr20	-	463337	524482		GCCGCCGCTGCCGCTTCCACCACAGTTTGAAGAAAACAGGTCTGAAACAAGGTCTTACCC	1457	Hs.644056	GO:0005524|GO:0000166|GO:0047485|GO:0005515|GO:0004674|GO:0016055|GO:0007411|GO:0006468|GO:0007165|GO:0016581|GO:0016580|GO:0005829|GO:0005634|GO:0005886	NP_808228	Casein kinase 2, alpha 1 polypeptide
ASHG19A3A001019	620.937	886.307	9.18128	9.87523	coding	NM_001014990	MRPL22	RefSeq_coding	3072	chr5	+	154320632	154348970		GGAGCCGGGGGAAGCTGGCCTTGGGGAAATCTACCACTGTCGAAGACAAATAAAATATAG	29093	Hs.483924	GO:0003735|GO:0006412|GO:0005622|GO:0015934|GO:0005739	NP_054899	Mitochondrial ribosomal protein L22
ASHG19A3A013869	623.364	697.466	9.18751	9.53513	coding	NM_032673	PCGF1	RefSeq_coding	939	chr2	-	74732177	74734821		AAGATCAAAGACTTGAATGAACACATTGTTTGCTGCCTATGCGCCGGCTACTTCGTGGAT	84759	Hs.316750	GO:0046872|GO:0008022|GO:0008270|GO:0005730|GO:0005634	NP_116062	Polycomb group ring finger 1
ASHG19A3A042268	82.1528	161.697	6.28259	7.42132	coding	NM_016076	PPPDE1	RefSeq_coding	4093	chr1	+	244816351	244872332		AATATACCTCATCCATTGGAATTGGAGTTTTTCATTCAGGAATTGAAGTCTATGGCAGAG	51029	Hs.498317		NP_057160	PPPDE peptidase domain containing 1
ASHG19A3A022145	140.334	85.4743	7.04928	6.49	coding	NM_015562	UBXN7	RefSeq_coding	4740	chr3	-	196080370	196159345		ACCCTTGCAGATCTATTCCGGCCACCCATTGATTTGATGCATAAAGGCAGCTTTGAAACA	26043	Hs.518524	GO:0005515	NP_056377	UBX domain protein 7
ASHG19A3A045213	96.4483	82.1867	6.52021	6.43651	coding	NM_004811	LPXN	RefSeq_coding	1926	chr11	-	58294345	58343390		TACAGGAACCAAAAAGGTTTATAGAGGCTGCCTTATGCTGTCTCATCCAGTTCCTTTGCG	9404	Hs.125474	GO:0046872|GO:0008270|GO:0007155|GO:0006461|GO:0007165|GO:0005737	NP_004802	Leupaxin
ASHG19A3A029147	460.78	547.265	8.75458	9.19324	coding	NM_021025	TLX3	RefSeq_coding	1513	chr5	+	170736287	170739137		AATAATAAAAAAGTTTTGGCTTTTTTCTTTAGAAACCGGCCACCTGCTTCCCCCGCGGGG	30012	Hs.249125	GO:0043565|GO:0003700|GO:0030528|GO:0007417|GO:0007275|GO:0045665|GO:0048665|GO:0001764|GO:0002087|GO:0006355|GO:0007585|GO:0005634	NP_066305	T-cell leukemia homeobox 3
ASHG19A3A020611	97.8001	96.3567	6.541	6.66249	coding	NM_001164106	MOV10L1	RefSeq_coding	1351	chr22	+	50585483	50600115		GGGCTCTTTGGGGGCAGAGCGGGCACTGCATGGACCCTGCACCCTGGAGCTGATGTTCAG	54456	Hs.62880	GO:0005524|GO:0004004|GO:0003723|GO:0004386|GO:0016787|GO:0000287|GO:0000166|GO:0007281|GO:0007275|GO:0007283|GO:0005622	NP_061868	Mov10l1, Moloney leukemia virus 10-like 1, homolog (mouse)
ASHG19A3A051080	30266.6	21211.4	14.8302	14.4507	coding	NM_022151	MOAP1	RefSeq_coding	2435	chr14	-	93648542	93651249		CACAGATTTCTGCTATGTGTCATCAAAACATCTAGTTCTGAGTAACATTTTCACGATTGT	64112	Hs.24719	GO:0005515|GO:0042803|GO:0006919|GO:0030262|GO:0006921|GO:0005737	NP_071434	Modulator of apoptosis 1
ASHG19A3A001429	6716.16	9106.98	12.6295	13.2245	coding	NM_016096	ZNF706	RefSeq_coding	2755	chr8	-	102209267	102217960	NM_001042511,	CCGACGCAAGACTGTCCCGGCCCGGATATGGCTCGTGGACAGCAGAAAATTCAGTCTCAG	51123	Hs.374485	GO:0046872|GO:0008270|GO:0005622	NP_057180	Zinc finger protein 706
ASHG19A3A004644	116.305	84.1665	6.78461	6.4699	coding	NM_012266	DNAJB5	RefSeq_coding	2357	chr9	+	34989724	34998428		CGGCGGCGCCCGCAGCTCCTCACCGAAACAAGGAGACCAGTGCTGGTCCAGTGGCTGTGA	25822	Hs.237506	GO:0031072|GO:0051082|GO:0000122|GO:0006457|GO:0006986|GO:0005829|GO:0005634	NP_036398	DnaJ (Hsp40) homolog, subfamily B, member 5
ASHG19A3A054819	749.367	1673.67	9.45877	10.7943	coding	NM_001079843	CASZ1	RefSeq_coding	7938	chr1	-	10696667	10856707		CTCCTCGGCACCTGGTTATTAAGAACTGAATATTTTTCCACTTGAATTTAGTGCTATTAG	54897	Hs.439894	GO:0003677|GO:0046872|GO:0008270|GO:0005737|GO:0005622|GO:0043231|GO:0005730|GO:0005634	NP_060236	Castor zinc finger 1
ASHG19A3A046676	98.0932	75.7739	6.54537	6.32302	coding	NM_001164160	SAPS3	RefSeq_coding	5145	chr11	+	68228185	68382799		AGTGATGATGAAATTGACTTTAAAGAAACGGGTTTCTCACAGGATTCTTCTTTGCAGCAA	55291	Hs.503022	GO:0005515|GO:0019903|GO:0043666|GO:0005737|GO:0005634	NP_060782	Protein phosphatase 6, regulatory subunit 3
ASHG19A3A001985	187.822	165.666	7.46784	7.45475	coding	NM_001127208	TET2	RefSeq_coding	9677	chr4	+	106067942	106200958		TCAGGGATGTCCTATTGCTAAGTGGGTGGTTCGCAGAAGCAGCAGTGAAGAGAAGCTACT	54790	Hs.367639	GO:0046872|GO:0070579|GO:0070579|GO:0016491|GO:0016702|GO:0007049|GO:0030099|GO:0055114	NP_060098	Tet oncogene family member 2
ASHG19A3A035856	312.838	248.474	8.20207	8.04196	coding	NM_015602	TOR1AIP1	RefSeq_coding	3824	chr1	+	179851419	179889212		AACTGAAGAAGATGATCAAGACAGCTCTCACAGCAGTGTCACTACTGTTAAGGCCAGATC	26092	Hs.496459	GO:0016021|GO:0016020|GO:0005637|GO:0005634	NP_056417	Torsin A interacting protein 1
ASHG19A3A010314	618.201	494.581	9.17374	9.04919	coding	NM_006111	ACAA2	RefSeq_coding	1952	chr18	-	47309874	47340251		TTTGGAGCTTACGGAGGCCTTCTGAAAGACTTCACTGCTACTGACTTGTCTGAATTTGCT	10449	Hs.200136	GO:0003988|GO:0008415|GO:0005515|GO:0016740|GO:0006916|GO:0006695|GO:0006631|GO:0006629|GO:0005739|GO:0005739	NP_006102	Acetyl-CoA acyltransferase 2
ASHG19A3A052307	783.989	629.912	9.52554	9.38879	coding	NM_024666	AAGAB	RefSeq_coding	2864	chr15	-	67493368	67547074		TTTAGCCTTCTCAACTCATTGACTGGAACAAACCATAGCATTGGGTCAGCAGATCCCTGT	79719	Hs.254642	GO:0015031|GO:0005737	NP_078942	Alpha- and gamma-adaptin binding protein
ASHG19A3A004250	1685.12	1801.78	10.638	10.9053	coding	NM_004203	PKMYT1	RefSeq_coding	2121	chr16	-	3022793	3030474	AL713779,	GCAACTGGGATGACGACAGCCTAGGGCCTTCACTCTCCCCTGAGGCTGTCCTGGCCCGGA	9088	Hs.77783	GO:0005524|GO:0016301|GO:0016301|GO:0000166|GO:0005515|GO:0004672|GO:0004674|GO:0000082|GO:0000086|GO:0007067|GO:0000278|GO:0016310|GO:0016310|GO:0006468|GO:0051726|GO:0000079|GO:0007088|GO:0005794|GO:0000139|GO:0005783|GO:0005789|GO:0016020|GO:0005624|GO:0005654|GO:0005654	NP_872629	Protein kinase, membrane associated tyrosine/threonine 1
ASHG19A3A004119	94.3712	88.4805	6.487	6.53783	coding	NM_003242	TGFBR2	RefSeq_coding	4629	chr3	+	30647993	30735631		ATCCCACCGCACGTTCAGAAGTCGGTTAATAACGACATGATAGTCACTGACAACAACGGT	7048	Hs.82028	GO:0005524|GO:0046332|GO:0005539|GO:0046872|GO:0000166|GO:0005515|GO:0005515|GO:0004872|GO:0004702|GO:0016740|GO:0050431|GO:0050431|GO:0005024|GO:0005024|GO:0005024|GO:0005026|GO:0004675|GO:0034713|GO:0034713|GO:0034714|GO:0032147|GO:0001568|GO:0007420|GO:0048701|GO:0035162|GO:0007507|GO:0043011|GO:0060021|GO:0060389|GO:0001569|GO:0018105|GO:0018107|GO:0002663|GO:0051138|GO:0002666|GO:0008284|GO:…	NP_003233	Transforming growth factor, beta receptor II (70/80kDa)
ASHG19A3A002843	2572.76	2337.64	11.2394	11.2812	coding	NM_001145546	GALP	RefSeq_coding	889	chr19	+	56687388	56697144		TCCAGCATCCGCACCTGCCCACCGGTCCTCCACCTTCCCCAAATGGGTGACCAAGACGGA	85569	Hs.283915	GO:0005179|GO:0008150|GO:0007218|GO:0009725|GO:0032868|GO:0005575|GO:0005576	NP_149097	Galanin-like peptide
ASHG19A3A054661	1841.27	2115.02	10.7596	11.1362	coding	NM_020465	NDRG4	RefSeq_coding	3356	chr16	+	58497548	58547522		CGTCGGCGGCGCCGAAGCCCCGCTCCCCGCCTGCGCGTCTGTCTCGTCCGCATCTCCGCG	65009	Hs.322430	GO:0030154|GO:0016049|GO:0007275|GO:0006950|GO:0005737	NP_075061	NDRG family member 4
ASHG19A3A048629	3131.03	3371.41	11.5305	11.7935	coding	NM_015319	TENC1	RefSeq_coding	4952	chr12	+	53442732	53458160		TGAAGACTCCCAGGCCATTAACCCCTTAGCTTTTAGGAAGATTACTCCCCCTTTTTCAAG	23371	Hs.6147	GO:0016787|GO:0046872|GO:0004721|GO:0005515|GO:0035556|GO:0008285|GO:0030054|GO:0005925|GO:0005886	NP_938072	Tensin like C1 domain containing phosphatase (tensin 2)
ASHG19A3A044128	333.307	169.532	8.29228	7.48977	coding	NM_012330	MYST4	RefSeq_coding	8550	chr10	+	76586378	76792639		GCATAATGATCATGCCCCAGCACCAAAGGCAAGGATTTGGACGGTTTCTCATTGATTTCA	23522	Hs.35758	GO:0003677|GO:0016407|GO:0004402|GO:0046872|GO:0005515|GO:0016563|GO:0008134|GO:0016564|GO:0016740|GO:0008270|GO:0016568|GO:0043966|GO:0016573|GO:0006334|GO:0006355|GO:0070776|GO:0000786|GO:0005634|GO:0005634	NP_036462	MYST histone acetyltransferase (monocytic leukemia) 4
ASHG19A3A018404	579.638	352.062	9.08203	8.55087	coding	NM_001174087	NCOA3	RefSeq_coding	7993	chr20	+	46130600	46285620		GAAAACTTGGATCCACTGGCCAGTGATTCACGAAAACGCAAATTGCCATGTGATACTCCA	8202	Hs.592142	GO:0008415|GO:0050681|GO:0004402|GO:0016922|GO:0035257|GO:0047485|GO:0005515|GO:0004871|GO:0046966|GO:0003713|GO:0003713|GO:0030528|GO:0016740|GO:0030521|GO:0044255|GO:0045944|GO:0045893|GO:0005737|GO:0005654|GO:0005634	NP_858045	Nuclear receptor coactivator 3
ASHG19A3A037300	4802.47	3098.66	12.1558	11.6716	coding	NM_013442	STOML2	RefSeq_coding	1303	chr9	-	35099892	35103154		TTGAACATCCTCATCCCTGTGTTAGACCGGATCCGATATGTGCAGAGTCTCAAGGAAATT	30968	Hs.3439	GO:0005102|GO:0005737|GO:0005856|GO:0016020|GO:0005743|GO:0005739	NP_038470	Stomatin (EPB72)-like 2
ASHG19A3A008052	303.133	362.906	8.1583	8.5991	coding	NM_000691	ALDH3A1	RefSeq_coding	1794	chr17	-	19641299	19651746		TCAATGGACGGGAAGCAGGGTCCTTAAATACGTCCCCTCTTGGCTCTTGCCGTTCCAGGA	218	Hs.531682	GO:0004028|GO:0008106|GO:0004029|GO:0016491|GO:0007568|GO:0006081|GO:0055114|GO:0008284|GO:0051591|GO:0042493|GO:0051384|GO:0001666|GO:0007584|GO:0014070|GO:0005737|GO:0005829|GO:0005783	NP_001128640	Aldehyde dehydrogenase 3 family, member A1
ASHG19A3A052001	100.062	188.607	6.57526	7.64096	coding	NM_005739	RASGRP1	RefSeq_coding	5048	chr15	-	38780302	38857007		GGAGTGTCTCCCAAACCTGATCCAAAAACCATTAGCAAACACGTCCAGAGGATGGTGGAT	10125	Hs.591127	GO:0005509|GO:0005085|GO:0008289|GO:0005515|GO:0007265|GO:0007596|GO:0030154|GO:0030168|GO:0051056|GO:0007165|GO:0005794|GO:0000139|GO:0005737|GO:0005829|GO:0005783|GO:0005789|GO:0005622|GO:0005624|GO:0005886	NP_005730	RAS guanyl releasing protein 1 (calcium and DAG-regulated)
ASHG19A3A000741	358.436	405.699	8.39494	8.75872	coding	NM_001003677	C11orf49	RefSeq_coding	1753	chr11	+	46958250	47183796		CAATGGATGAAGAGCTGGAACGGCTGCTTCTTCCCTTCTTCAGGCTGGCCCAGGTCCCAG	79096	Hs.368296		NP_077018	Chromosome 11 open reading frame 49
ASHG19A3A037950	87.7602	93.4958	6.37696	6.61907	coding	NM_001173425	DFNB31	RefSeq_coding	4076	chr9	-	117164360	117267736		TGAGAAGGAAGGACTGCGGGTCGGGGACCAGATTCTGCGCGTCAACGACAAATCCCTGGC	25861	Hs.93836	GO:0005515|GO:0060122|GO:0050896|GO:0001895|GO:0050953|GO:0007605|GO:0007601|GO:0042995|GO:0005737|GO:0030426|GO:0032420	NP_056219	Deafness, autosomal recessive 31
ASHG19A3A038066	979.497	845.54	9.84894	9.81292	coding	NM_000476	AK1	RefSeq_coding	2266	chr9	-	130628760	130640022		AAAGGCTTCCTGATTGATGGCTACCCGCGGGAGGTGCAGCAAGGAGAAGAGTTTGAGCGA	203	Hs.175473	GO:0005524|GO:0004017|GO:0019205|GO:0000166|GO:0005515|GO:0016740|GO:0046034|GO:0015949|GO:0055086|GO:0005737|GO:0005829	NP_000467	Adenylate kinase 1
ASHG19A3A009471	332.203	265.145	8.28812	8.1363	coding	NM_017596	KIF21B	RefSeq_coding	9895	chr1	-	200938519	200992828		CTGTTCCTAGATTGGATGTGTGTGTTCTAAGAAGTTGTCATAAATAAAACCTGAATGACC	23046	Hs.169182	GO:0005524|GO:0003777|GO:0000166|GO:0007018|GO:0005737|GO:0005856|GO:0005874	NP_060066	Kinesin family member 21B
ASHG19A3A035734	190.254	174.675	7.48809	7.53207	coding	NM_001160224	RNF170	RefSeq_coding	2020	chr8	-	42704780	42751866		ACCTCAGAGATATTCCCAGCAGTCTCAATATCCATGGTAATGCTAATAAACTACTATTCT	81790	Hs.491626	GO:0046872|GO:0008270|GO:0016021|GO:0016020	NP_112216	Ring finger protein 170
ASHG19A3A036523	22244.8	9375.86	14.3625	13.2654	coding	NM_001160008	NRG1	RefSeq_coding	2377	chr8	+	32405727	32618507		GCTTGCCCTCCACCCTATAGTATCTATTTTATGAAATTCCAAGAAGGGATGAATAAATAA	3084	Hs.453951	GO:0043125|GO:0043125|GO:0005125|GO:0008083|GO:0008083|GO:0005515|GO:0030296|GO:0005102|GO:0030971|GO:0003712|GO:0030297|GO:0030297|GO:0007219|GO:0007171|GO:0006916|GO:0055007|GO:0007154|GO:0008283|GO:0043624|GO:0009790|GO:0030879|GO:0010667|GO:0051048|GO:0007399|GO:0014032|GO:0060045|GO:0045785|GO:0030307|GO:0061098|GO:0051155|GO:0043497|GO:0043496|GO:0007169|GO:0055012|GO:0042060|GO:0042060|GO:…	NP_039258	Neuregulin 1
ASHG19A3A015211	2343.5	1023.37	11.1033	10.0833	coding	NM_015148	PASK	RefSeq_coding	4530	chr2	-	242045514	242088878		ACACAGCCTGTGAATCTTGCTGACTATACATGGGAAGAGGTGTTTCGAGTAAACAAGCCA	23178	Hs.397891	GO:0005524|GO:0042802|GO:0000166|GO:0005515|GO:0004674|GO:0004871|GO:0016740|GO:0006468|GO:0006355|GO:0005794|GO:0005737	NP_055963	PAS domain containing serine/threonine kinase
ASHG19A3A049044	348.739	218.813	8.35342	7.85887	coding	NM_013386	SLC25A24	RefSeq_coding	3495	chr1	-	108677448	108742974		GGCGAGCTGCAGGAGGGGCTCAGGAACCTGGGCATCCCTCTGGGCCAGGACGCCGAGGAG	29957	Hs.656870	GO:0005488|GO:0005509|GO:0055085|GO:0005737|GO:0016021|GO:0016020|GO:0005743|GO:0005739	NP_998816	Solute carrier family 25 (mitochondrial carrier; phosphate carrier), member 24
ASHG19A3A038208	3955	3695.22	11.8715	11.932	coding	NM_152833	C9orf69	RefSeq_coding	2866	chr9	-	139006427	139010731		TTGTTTTTTGTTAACGTATTACTCAGAGTCACCCAAGCCTCTTGGCTGAGGGTGAAGGTG	90120	Hs.287411		NP_690046	Chromosome 9 open reading frame 69
ASHG19A3A036019	155.293	85.8958	7.1961	6.49704	coding	NM_015902	UBR5	RefSeq_coding	9410	chr8	-	103265568	103424495		AAGCAGCATTGCTTTCCTTGGTCAGAATGAGAGGAATGTAGCCATTTTCACTGCTGGACA	51366	Hs.492445	GO:0003723|GO:0016881|GO:0016874|GO:0046872|GO:0005515|GO:0004842|GO:0034450|GO:0008270|GO:0008283|GO:0090263|GO:0035413|GO:0033160|GO:0050847|GO:0006464|GO:0000209|GO:0016567|GO:0042787|GO:0006974|GO:0006511|GO:0005622|GO:0005634|GO:0005625	NP_056986	Ubiquitin protein ligase E3 component n-recognin 5
ASHG19A3A001711	1420.36	1244.42	10.385	10.3692	coding	NM_001098822	TMEM91	RefSeq_coding	943	chr19	+	41882437	41889985	NM_001098825,	CGCTGCCTTCTGTCTAGCCCAGAAGACCCGCCCTAGTTGCCCCTACAGCCCTCACTGTGA	641649	Hs.709417	GO:0009607|GO:0016021|GO:0016020	NP_001092295	Transmembrane protein 91
ASHG19A3A013182	7131.5	6619.09	12.7226	12.7711	coding	NM_001077710	FAM110C	RefSeq_coding	3963	chr2	-	38815	46588		GGCAGTTTCTAAACAGAGCTTTTTCTATACACTATTTGCAACTGGAGTGCAATATTGTAT	642273	Hs.8379	GO:0005737|GO:0005856|GO:0005874|GO:0005815|GO:0000922	NP_001071178	Family with sequence similarity 110, member C
ASHG19A3A016335	122067	121996	16.9201	16.8757	coding	NM_025029	FAM128B	RefSeq_coding	967	chr2	+	130939500	130948299	NM_001085365,	GCTACATGTTACCTCCTTCAATTGATAATAAACCTTTCTGAGATGCAGAGGGTCCAGGTC	80097	Hs.469925	GO:0005515|GO:0005813|GO:0005737|GO:0005856|GO:0008274|GO:0005819	NP_079305	Mitotic spindle organizing protein 2B
ASHG19A3A021754	1548.94	1102.25	10.5098	10.1921	coding	NM_053024	PFN2	RefSeq_coding	2117	chr3	-	149682690	149688741		TTTATTAGCAATGCAGGGTGATGGGGTATGAACCTGTGTCTCCTTTGTATCCCTCTGTTG	5217	Hs.91747	GO:0003779|GO:0005546|GO:0005515|GO:0030036|GO:0008064|GO:0015629|GO:0005737	NP_444252	Profilin 2
ASHG19A3A050724	489.612	674.682	8.83862	9.48604	coding	NM_001079537	TRAPPC6B	RefSeq_coding	3364	chr14	-	39617014	39639634		AAATTTCGCCTGCTTACTCAGATGTCTGCAGGAAAACAGTATTTAGAACATGCATCTAAG	122553	Hs.13303	GO:0004383|GO:0020037|GO:0016192|GO:0005794|GO:0005783	NP_803235	Trafficking protein particle complex 6B
ASHG19A3A040679	118.565	98.4456	6.81125	6.69357	coding	NM_078628	MSL3	RefSeq_coding	3564	chrX	+	11776277	11786096		AAGGCATACCTTTAAGAGAAGCCCTTTGAATAATCAAGTGCTAAAACAAAATCAGGTGCT	10943	Hs.655288	GO:0003677|GO:0003682|GO:0035064|GO:0003700|GO:0006333|GO:0016568|GO:0043984|GO:0007275|GO:0006366|GO:0072487|GO:0000785|GO:0005634	NP_523353	Male-specific lethal 3 homolog (Drosophila)
ASHG19A3A049514	238.579	141.769	7.81285	7.22737	coding	NM_183422	TSC22D1	RefSeq_coding	4837	chr13	-	45007660	45150701		TTCTACCCAGTTCTCCGCACAATCATTAGCTCAGGCAATTGGAAGCCAAATTGAAGATGC	8848	Hs.507916	GO:0005515|GO:0003700|GO:0006355|GO:0006366|GO:0005737|GO:0005634	NP_904358	TSC22 domain family, member 1
ASHG19A3A009906	232.621	229.151	7.77535	7.92233	coding	NM_018653	GPRC5C	RefSeq_coding	1836	chr17	+	72429835	72443566		GGGAACCTCCCTGAAGAGTGCCCTGGTCACAGCACCCTTGAAGACAGCCATTGGCCATGG	55890	Hs.446438	GO:0004930|GO:0005515|GO:0004872|GO:0007186|GO:0031410|GO:0030659|GO:0005887|GO:0005739|GO:0005886	NP_071319	G protein-coupled receptor, family C, group 5, member C
ASHG19A3A015094	277.843	253.763	8.03425	8.07156	coding	NM_016831	PER3	RefSeq_coding	6203	chr1	+	7844762	7905236		TTGATCCTGAATCGTAAGAAAGATGTCCTGGCGTCTTCTCACTTTGTTGACCTGCTTGCA	8863	Hs.162200	GO:0004871|GO:0006355|GO:0048511|GO:0005737|GO:0005634	NP_058515	Period homolog 3 (Drosophila)
ASHG19A3A034308	340.743	355.247	8.3224	8.56363	coding	NM_181597	UPP1	RefSeq_coding	1857	chr7	+	48128354	48148329		TTGGGTTAGTCCTAGAGCCGCTTCTAGCCCGGTTTCCTCCGCCCCAGGTTAGGACCACGT	7378	Hs.488240	GO:0004850|GO:0055086|GO:0006139|GO:0009116|GO:0009166|GO:0006206|GO:0046135|GO:0043097|GO:0006220|GO:0046108|GO:0005737|GO:0005829	NP_853628	Uridine phosphorylase 1
ASHG19A3A014648	1075.9	1054.39	9.98692	10.1238	coding	NM_004882	CIR1	RefSeq_coding	1809	chr2	-	175212879	175260443		TTCGCCAACTTCATGTGCAAGAAAGACTTTCATCCTGCCTCCAAATCCAATATCAAAAAA	9541	Hs.632531	GO:0005515|GO:0003700|GO:0003714|GO:0008380|GO:0006397|GO:0045892|GO:0006351|GO:0000118|GO:0016607|GO:0005634	NP_004873	Corepressor interacting with RBPJ, 1
ASHG19A3A019381	196.087	199.636	7.53188	7.72654	coding	NM_058175	COL6A2	RefSeq_coding	3461	chr21	+	47518032	47549719		TTGGACGGAGCTGTTTTGTGCTGAAAGGTTTTCTCGGGGTCCGTGGTGTCCCCCAAAGGT	1292	Hs.420269	GO:0005201|GO:0005515|GO:0030674|GO:0007411|GO:0016337|GO:0030198|GO:0031012|GO:0005576|GO:0005615|GO:0016020|GO:0005578	NP_478055	Collagen, type VI, alpha 2
ASHG19A3A001132	143.614	149.76	7.08064	7.31213	coding	NM_001025367	VEGFA	RefSeq_coding	3608	chr6	+	43737945	43754221		CAAAAACGAAAGCGCAAGAAATCCCGTCCCTGTGGGCCTTGCTCAGAGCGGAGAAAGCAT	7422	Hs.73793	GO:0043498|GO:0042056|GO:0005125|GO:0050840|GO:0001968|GO:0008083|GO:0008083|GO:0008201|GO:0008201|GO:0005161|GO:0005515|GO:0046982|GO:0042803|GO:0043183|GO:0043184|GO:0005172|GO:0001525|GO:0002575|GO:0007596|GO:0071456|GO:0050930|GO:0050930|GO:0007275|GO:0043066|GO:0007399|GO:0030168|GO:0002576|GO:0048008|GO:0050918|GO:0045766|GO:0045766|GO:0043536|GO:0051781|GO:0030335|GO:0008284|GO:0051272|GO:…	NP_003367	Vascular endothelial growth factor A
ASHG19A3A001696	5338.53	7353.51	12.3023	12.9173	coding	NM_001098729	GTF2H2B	RefSeq_coding	2088	chr5	+	69711215	69743882	NM_001515,NM_001098728,NM_001042490,	CATTCTATTCAAGGCAAAGAGAAAAAGAGTATTTGAGCACCATGGACAAGTTCGACTTGG
ASHG19A3A005263	201.367	120.247	7.5678	6.99307	coding	NM_022362	MMS19	RefSeq_coding	3703	chr10	-	99218082	99258366		AGGACTCCTCAACAAGCACCCTGCAGGGCAGCAGCTGGATGAATTCCTACAGCTAGCTGT	64210	Hs.500721	GO:0030331|GO:0005515|GO:0030674|GO:0030159|GO:0003713|GO:0007059|GO:0006289|GO:0006289|GO:0045893|GO:0009725|GO:0000160|GO:0071817|GO:0005737|GO:0005856|GO:0005675|GO:0005634|GO:0005634|GO:0005819	NP_071757	MMS19 nucleotide excision repair homolog (S. cerevisiae)
ASHG19A3A039290	107.847	134.576	6.68139	7.15347	coding	NM_001122821	SET	RefSeq_coding	2863	chr9	+	131445933	131458674		TCATGTAAATATCCCTTCCAGGCAGGGCGGCTCCAGTGCAGATTTAAGCCGCTGGCACCT	6418	Hs.436687	GO:0042393|GO:0005515|GO:0004864|GO:0008601|GO:0016564|GO:0006260|GO:0016070|GO:0016071|GO:0035067|GO:0043524|GO:0006913|GO:0006334|GO:0006337|GO:0005737|GO:0005829|GO:0005783|GO:0005654|GO:0005634|GO:0048471|GO:0043234	NP_003002	SET nuclear oncogene
ASHG19A3A046553	8356.18	9825.91	12.954	13.3325	coding	NM_012094	PRDX5	RefSeq_coding	959	chr11	+	64085568	64089282		AAGGGAGTCCAGGTGGTGGCCTGTCTGAGTGTTAATGATGCCTTTGTGACTGGCGAGTGG	25824	Hs.502823	GO:0043027|GO:0016491|GO:0004601|GO:0051920|GO:0045454|GO:0034614|GO:0006954|GO:0043066|GO:0055114|GO:0006979|GO:0005737|GO:0044445|GO:0005739|GO:0005777	NP_857635	Peroxiredoxin 5
ASHG19A3A009246	519.697	394.188	8.9266	8.71415	coding	NM_001033555	CYTSB	RefSeq_coding	3762	chr17	+	20059401	20218065	NM_001033553,	CAGTCTTTTGGTTGCTGTTGTTAAAAATATCCCGGCTTTGCCTTTATGAAACCTTTGCCC	92521	Hs.431045	GO:0005634	NP_690868	Sperm antigen with calponin homology and coiled-coil domains 1
ASHG19A3A001794	545.517	733.459	8.99542	9.60755	coding	NM_001100819	MOBKL3	RefSeq_coding	2800	chr2	+	198380770	198417513		GAACAGGCCGGGCACCAAGGCGCAGTATATTCAACAGAACATAAGAGCAGATTGCTCCAA	25843	Hs.645458	GO:0046872|GO:0005515|GO:0006810|GO:0005794|GO:0032580|GO:0005737|GO:0016020|GO:0048471	NP_955776	MOB1, Mps One Binder kinase activator-like 3 (yeast)
ASHG19A3A034569	219.897	161.784	7.69759	7.42199	coding	NM_001099435	SPDYE5	RefSeq_coding	2667	chr7	+	75124298	75133627	NM_175064,NM_001146210,	TCAAGAGAACAATAGAGTGCGTCTCTTGGGGAAACATAATAAAAATGAACTTTTCTCACC	442590	Hs.632298		NP_001092905	Speedy homolog E5 (Xenopus laevis)
ASHG19A3A006874	1220.58	1149.94	10.1692	10.2556	coding	NM_199332	HOMER2	RefSeq_coding	1840	chr15	-	83517737	83621473	NM_199330,	AATCGAGACCTCAAGTAATCATTCCCAAGAATCTGGGCGTGAAACCCCATCTTCTACTCA	9455	Hs.578443	GO:0035256|GO:0005515|GO:0007216|GO:0030054|GO:0005737|GO:0005886|GO:0014069|GO:0045211|GO:0045202	NP_955364	Homer homolog 2 (Drosophila)
ASHG19A3A050029	66269.6	84114.2	16.0031	16.3562	coding	NM_005872	BCAS2	RefSeq_coding	1310	chr1	-	115110182	115124265		GAGATAGTTCTAAACACATTCTTGATCACCAAACAACTTCAGAAAGACAGTGACTGTACA	10286	Hs.22960	GO:0005515|GO:0008380|GO:0000375|GO:0006397|GO:0005730|GO:0005634|GO:0005681	NP_005863	Breast carcinoma amplified sequence 2
ASHG19A3A001674	250.439	232.313	7.88615	7.94366	coding	NM_001098502	CHCHD4	RefSeq_coding	1476	chr3	-	14153577	14166371		GCCATGTCCTATTGCCGGCAGGAAGGGAAGGATCGAATCATATTTGTAACCAAAGAAGAT	131474	Hs.517815	GO:0015031|GO:0055085|GO:0005758|GO:0005739	NP_653237	Coiled-coil-helix-coiled-coil-helix domain containing 4
ASHG19A3A011735	9478.07	11302	13.1403	13.5388	coding	NM_145888	KLK10	RefSeq_coding	2985	chr19	-	51516000	51522954		CCACAGGCAGGGCAGAGGCACGTCTGGGTCCCCTCCCTCCTTCCTATCGGCGACTCCCAG	5655	Hs.275464	GO:0008233|GO:0004252|GO:0008236|GO:0007049|GO:0006508|GO:0005576	NP_665895	Kallikrein-related peptidase 10
ASHG19A3A004680	2896.89	2219.16	11.4058	11.207	coding	NM_013406	DHPS	RefSeq_coding	1210	chr19	-	12786533	12792677		GGCCTGGTCCTGGACATCGTTGAGGCCCAGGAGTTTGATGGCTCTGACTCAGGTGCCCGA	1725	Hs.79064	GO:0034038|GO:0034038|GO:0005515|GO:0016740|GO:0044267|GO:0008612|GO:0008284|GO:0043687|GO:0051289|GO:0050983|GO:0006412|GO:0005829|GO:0005829	NP_037539	Deoxyhypusine synthase
ASHG19A3A034149	140.658	125.765	7.05231	7.05848	coding	NM_001005214	LRRC52	RefSeq_coding	1125	chr1	+	165513477	165533185		TGGAAGTGCAACTGCTCTTTCCTGGACTTCGCCATCTTCTTAATAGTGTTCCATATGGAC	440699	Hs.664975	GO:0016021|GO:0016020	NP_001005214	Leucine rich repeat containing 52
ASHG19A3A020085	27234.3	27520.6	14.6649	14.8068	coding	NM_003776	MRPL40	RefSeq_coding	787	chr22	+	19420035	19423594		CAGGGTTCAAGTCTGCTTTCCACAGAATCAGGCATGCTGTTAATAAATACTGGTTTAATC	64976	Hs.431307	GO:0003674|GO:0009653|GO:0005761|GO:0005739|GO:0005634|GO:0005840	NP_003767	Mitochondrial ribosomal protein L40
ASHG19A3A043408	201.792	170.628	7.57072	7.49874	coding	NM_022802	CTBP2	RefSeq_coding	4752	chr10	-	126676418	126716453		AGATGGCTTACGAGACTTACGAAGCTGACCTGTCCACCTTCCAGGGTCCTGGTGGCAAGA	1488	Hs.501345	GO:0051287|GO:0048037|GO:0016491|GO:0016616|GO:0005515|GO:0016564|GO:0030154|GO:0008285|GO:0055114|GO:0019079|GO:0050872|GO:0030054|GO:0005634|GO:0045202|GO:0017053	NP_073713	C-terminal binding protein 2
ASHG19A3A035254	311.697	295.647	8.19735	8.29509	coding	NM_001005480	OR2A2	RefSeq_coding	957	chr7	+	143806675	143807630		GGAGAAAATGCTGTCCCTGTTTCACAGTGTCTTTAATCCAATGCTGAACCCCCTGATCTA	442361	Hs.553841	GO:0004984|GO:0004872|GO:0050896|GO:0007608|GO:0016021|GO:0005886	NP_001005480	Olfactory receptor, family 2, subfamily A, member 2
ASHG19A3A011162	15458.3	7912.15	13.8443	13.0218	coding	NM_014299	BRD4	RefSeq_coding	4635	chr19	-	15357848	15391262		TTGTGTTGAGTTGAAGATTGTCATGGAATAAAGATCACACCGTACTTGAGGCCATCTTCA	23476	Hs.187763	GO:0005515|GO:0044419|GO:0043388|GO:0010971|GO:0090040|GO:0006468|GO:0000114|GO:0000794|GO:0005737|GO:0005730|GO:0005634	NP_490597	Bromodomain containing 4
ASHG19A3H0000526	98.978	101.718	6.55875	6.74182	coding	NM_006361_intron2+	NM_006361	HOX cluster	948	chr17	+	46804405	46805354		CCACCATCACATACGTCCAGTCTTCATGCATTTCCAGACTCTTGGCCACTCTTTTAGATT
ASHG19A3A000578	860.892	1112.78	9.65965	10.2074	coding	NM_175914	HNF4A	RefSeq_coding	1369	chr20	+	42984440	43058311	NM_000457,	TGGCCCCGACCCAGGGGACAGGCAGCCACCCCTGAGACCCCACAGCCCTCACCGCCAGGT	3172	Hs.116462	GO:0003677|GO:0001077|GO:0033613|GO:0005504|GO:0046872|GO:0010843|GO:0005515|GO:0042803|GO:0005102|GO:0003700|GO:0003707|GO:0008270|GO:0007596|GO:0031018|GO:0010467|GO:0042593|GO:0055088|GO:0030308|GO:0008285|GO:0006591|GO:0055091|GO:2000189|GO:0043193|GO:0010552|GO:0045944|GO:0010551|GO:0010551|GO:0060398|GO:0050796|GO:0019216|GO:0034339|GO:0006355|GO:0009749|GO:0006351|GO:0070328|GO:0006805|GO:…	NP_849181	Hepatocyte nuclear factor 4, alpha
ASHG19A3A002655	886.001	1333.56	9.70171	10.4676	coding	NM_001143958	TMEM30A	RefSeq_coding	4436	chr6	-	75962637	75994632		CTCCAACAACATCCGCGAGATCGAGGGCAACGTGTTTATGTATTATGGACTGTCTAATTT	55754	Hs.108530	GO:0016021|GO:0016020	NP_060717	Transmembrane protein 30A
ASHG19A3A029602	192.945	262.591	7.5086	8.12207	coding	NM_001010877	ZNF311	RefSeq_coding	2698	chr6	-	28962593	28973037		TTTCCATTTCCTAAACCTCCTTTAATCTCTCATCTGGAGCGAGAAGTAGACCCCTGTGTG	282890	Hs.148218	GO:0003677|GO:0046872|GO:0005515|GO:0008270|GO:0006355|GO:0005622|GO:0005634	NP_001010877	Zinc finger protein 311
ASHG19A3A045780	149.79	166.016	7.14548	7.45824	coding	NM_015645	C1QTNF5	RefSeq_coding	3927	chr11	-	119209651	119217383		AGCCTGCAGTTTGATCTGGTGAAGAATGGCGAATCCATTGCCTCTTTCTTCCAGTTTTTC	114902	Hs.632102	GO:0005576	NP_056460	C1q and tumor necrosis factor related protein 5
ASHG19A3A041764	250.725	120.928	7.88772	7.00096	coding	NM_001493	GDI1	RefSeq_coding	2505	chrX	+	153665258	153671812		TGCCATCTATGGGGGGACATATATGCTGAACAAACCTGTGGATGACATCATCATGGAGAA	2664	Hs.74576	GO:0005092|GO:0005096|GO:0005093|GO:0005515|GO:0015031|GO:0043087|GO:0051056|GO:0051592|GO:0007165|GO:0007264|GO:0005737|GO:0005829|GO:0030496|GO:0043234|GO:0019717	NP_001484	GDP dissociation inhibitor 1
ASHG19A3A038857	103.388	186.755	6.61959	7.62754	coding	NM_001007097	NTRK2	RefSeq_coding	7111	chr9	+	87284625	87430621		GTTCAACCATTTGCTGTAATCCAGAGGCAGCCTGTGAATCATTCTCATGCCCTGTTTTTT	4915	Hs.494312	GO:0005524|GO:0043121|GO:0005030|GO:0000166|GO:0016740|GO:0004714|GO:0007190|GO:0030154|GO:0007275|GO:0048011|GO:0007399|GO:0006468|GO:0007169|GO:0005887|GO:0016020	NP_006171	Neurotrophic tyrosine kinase, receptor, type 2
ASHG19A3A006276	1852.14	1928.19	10.7676	11.0068	coding	NM_170726	ALDH4A1	RefSeq_coding	2386	chr1	-	19197925	19229293		ACCGTCCAGCTGTCTGTCCGTCCAGATGCCTCCTGCTTGGATTCTGAGTGGTCAGAGATC	8659	Hs.77448	GO:0003842|GO:0004029|GO:0009055|GO:0016491|GO:0034641|GO:0055114|GO:0006561|GO:0006562|GO:0006560|GO:0005759|GO:0005739	NP_733844	Aldehyde dehydrogenase 4 family, member A1
ASHG19A3A000588	1065.56	1220.22	9.97464	10.3411	coding	NM_000535	PMS2	RefSeq_coding	2851	chr7	-	6012870	6048737	uc003uui.2,NR_003613,ENST00000506558,ENST00000442338,ENST00000423426,	CCATGGAGCGAGCTGAGAGCTCGAGTACAGAACCTGCTAAGGCCATCAAACCTATTGATC	5395	Hs.632637	GO:0005524|GO:0016887|GO:0003677|GO:0032407|GO:0004519|GO:0016787|GO:0030983|GO:0005515|GO:0032138|GO:0003697|GO:0006200|GO:0006298|GO:0007131|GO:0042493|GO:0016446|GO:0016447|GO:0032389|GO:0005634	NP_000526	PMS2 postmeiotic segregation increased 2 (S. cerevisiae)
ASHG19A3A009244	4529.14	3009.98	12.0718	11.6338	coding	NM_152904	CYTSB	RefSeq_coding	2714	chr17	+	19990334	20140481	NM_001033554,	GATGATGTTTCCCTCTTTTTACTTTTCCTCAGAAGATTGAGCTGTCTTTTATTTGGAGAA	92521	Hs.431045	GO:0005634	NP_690868	Sperm antigen with calponin homology and coiled-coil domains 1
ASHG19A3A025512	341.664	397.956	8.32579	8.72771	coding	NM_145263	SPATA18	RefSeq_coding	4314	chr4	+	52917592	52963457		AAGTCGTTGTCGAAGCAGGAGTTTAAGTCCCATTTGCCCCCGTAGCCAAATTGGTTTAAA	132671	Hs.527090	GO:0005515|GO:0030154|GO:0033554|GO:0035694|GO:0035695|GO:0007275|GO:0006974|GO:0007283|GO:0044447|GO:0005737|GO:0043231|GO:0005741	NP_660306	Spermatogenesis associated 18 homolog (rat)
ASHG19A3A004387	1100.5	791.305	10.0209	9.71779	coding	NM_005316	GTF2H1	RefSeq_coding	3308	chr11	+	18343815	18388590		TGTCTAGAGTTGTAGCTTCCACCTGCACCTTCTAGCCACCATGGCAACCTCATCTGAAGA	2965	Hs.577202	GO:0008094|GO:0008353|GO:0016251|GO:0005515|GO:0004672|GO:0006281|GO:0010467|GO:0006370|GO:0006289|GO:0000718|GO:0045944|GO:0050434|GO:0000079|GO:0006363|GO:0006362|GO:0006368|GO:0006368|GO:0006360|GO:0006366|GO:0006366|GO:0006361|GO:0006367|GO:0006367|GO:0006283|GO:0016032|GO:0005675|GO:0005654|GO:0005654|GO:0005634	NP_005307	General transcription factor IIH, polypeptide 1, 62kDa
ASHG19A3A003284	146.708	146.758	7.11399	7.27975	coding	NM_001165039	GFRA2	RefSeq_coding	2977	chr8	-	21549529	21646346		GTCTTCTGCCTCTTCTTCTTTCTAGGGACAGGGGCAGACCCGGTGGTCAGCGCCAAGAGC	2675	Hs.441202	GO:0016167|GO:0004872|GO:0007169|GO:0031225|GO:0019898|GO:0005886	NP_001486	GDNF family receptor alpha 2
ASHG19A3A025788	303.033	174.962	8.15791	7.53444	coding	NM_173567	EPHX4	RefSeq_coding	1443	chr1	+	92495532	92529093		TTGCTGCTGGAGAAAGAGGCAAACCACTTATGCTGCTGCTTCATGGATTTCCAGAATTCT	253152	Hs.201555	GO:0016787|GO:0016021|GO:0016020	NP_775838	Epoxide hydrolase 4
ASHG19A3A017968	1255.33	1980.03	10.2057	11.0457	coding	NM_001040023	SIRPA	RefSeq_coding	4109	chr20	+	1875825	1920539		TTATTTCTCGCGCGCTTGGGGTCTCTCCCAGTCTCCGTCTCTCCATTTCTCCTGGGGGGC	140885	Hs.728158	GO:0017124|GO:0007596|GO:0007155|GO:0034329|GO:0050900|GO:0016021|GO:0016020|GO:0005886|GO:0005886	NP_542970	Signal-regulatory protein alpha
ASHG19A3A030397	536.578	637.995	8.97477	9.40764	coding	NM_016262	TUBE1	RefSeq_coding	2314	chr6	-	112391860	112408751		AGTCGGCAGAGCACTGTGATTGCTTGCAGTGTTTCTTTATAATACATTCCATGGGAGGAG	51175	Hs.34851	GO:0005525|GO:0003924|GO:0000166|GO:0005200|GO:0007098|GO:0007018|GO:0051258|GO:0005737|GO:0005856|GO:0005874|GO:0005815|GO:0000242	NP_057346	Tubulin, epsilon 1
ASHG19A3A048197	99.3842	82.4489	6.56536	6.44001	coding	NM_183238	ZNF605	RefSeq_coding	6202	chr12	-	133498018	133532868		GATTCCGTGTCTGGCTTCATCTAAGTGGCCTGGTCCATGGGCAGTGAAGAAATGTAAAGT	100289635	Hs.29698	GO:0003677|GO:0046872|GO:0008270|GO:0006355|GO:0005622|GO:0005634	NP_899061	Zinc finger protein 605
ASHG19A3A011354	3076.95	2460.05	11.5045	11.3514	coding	NM_001035516	DMKN	RefSeq_coding	609	chr19	-	35988122	35992813		GCCTCTGCTCTGCTCCTGCTCCTGCTGGGCCTGGCCTGGACCCAGGGGAGCCACGGCTGG	93099	Hs.417795	GO:0005576	NP_201574	Dermokine
ASHG19A3A018431	400.46	320.699	8.55415	8.41385	coding	NM_005985	SNAI1	RefSeq_coding	1708	chr20	+	48599526	48605418		GGGCCTGGGAGGAAGATGTTTACATTTTTAAAGGTACACTGGTATTTATATTTCAAACAT	6615	Hs.48029	GO:0019900|GO:0046872|GO:0005515|GO:0043565|GO:0016563|GO:0016564|GO:0008270|GO:0001837|GO:0031069|GO:0001707|GO:0007275|GO:0060806|GO:0000122|GO:0001649|GO:0030335|GO:0010718|GO:0010718|GO:0060707|GO:0005737|GO:0005737|GO:0005622|GO:0005634|GO:0005634	NP_005976	Snail homolog 1 (Drosophila)
ASHG19A3A006985	611.95	402.363	9.16172	8.74516	coding	NM_205835	LSR	RefSeq_coding	2081	chr19	+	35739558	35758865		GCCTACGCAGAGCTCATCGTCCTTGTGTATGCCGCCGGCAAAGCAGCCACCTCAGGTGTT	51599	Hs.466507	GO:0004872|GO:0009790|GO:0001889|GO:0019216|GO:0042627|GO:0016021|GO:0034362|GO:0005886|GO:0034361	NP_991404	Lipolysis stimulated lipoprotein receptor
ASHG19A3A039256	3216.57	2974.9	11.5685	11.6147	coding	NM_014580	SLC2A8	RefSeq_coding	2145	chr9	+	130159464	130170161		CAGTTCCCTGGGTCATCAGCCATCAAATCTTGTTGAGTTTAAAAAATAAACAGCAAAAAA	29988	Hs.179522	GO:0055056|GO:0005536|GO:0005355|GO:0022891|GO:0005975|GO:0008643|GO:0006006|GO:0015758|GO:0008286|GO:0001666|GO:0055085|GO:0031410|GO:0030659|GO:0005887|GO:0043231|GO:0005886	NP_055395	Solute carrier family 2 (facilitated glucose transporter), member 8
ASHG19A3A037007	3700.65	5502.83	11.7822	12.5122	coding	NM_004600	TROVE2	RefSeq_coding	3251	chr1	+	193029003	193055114	NR_033393,NM_001173524,	TTAGGTTTGAAAGGCAATTTTTGAGTAGCATATTACCAGCTAGCCAGTCACTAGGAATTT	6738	Hs.288178	GO:0003723|GO:0005515|GO:0006383|GO:0005737|GO:0005730|GO:0005634|GO:0030529	NP_004591	TROVE domain family, member 2
ASHG19A3A044064	359.721	223.377	8.40176	7.88578	coding	NM_018649	H2AFY2	RefSeq_coding	2181	chr10	+	71812356	71872039		AACTTCAAATTCCACCTCTGAAGATGGGCCAGGGGATGGATTCACCATTCTGTCTTCTAA	55506	Hs.499953	GO:0003677|GO:0016568|GO:0007549|GO:0006334|GO:0001740|GO:0005694|GO:0000786|GO:0005634	NP_061119	H2A histone family, member Y2
ASHG19A3A027426	11305.9	4662.24	13.3944	12.2672	coding	NM_001040158	H2AFY	RefSeq_coding	1937	chr5	-	134670070	134734928	NM_004893,	TTGAGGTGGAGGCCATAATCAATCCTACCAATGCTGACATTGACCTTAAAGATGACCTAG	9555	Hs.420272	GO:0003677|GO:0016568|GO:0007549|GO:0006334|GO:0001740|GO:0005694|GO:0000786|GO:0005634	NP_613258	H2A histone family, member Y
ASHG19A3A002417	159.986	109.167	7.24201	6.84883	coding	NM_020895	GRAMD1A	RefSeq_coding	2672	chr19	+	35491245	35517373	NM_001136199,	TACAGCAACATCTTCCGCTGGGAGACCACGATCTCCATCCAGCTGAAGGAAGTGACATGT	57655	Hs.515351	GO:0016021|GO:0016020	NP_065946	GRAM domain containing 1A
ASHG19A3A020937	1328.81	1232.47	10.2892	10.3554	coding	NM_032970	SEC22C	RefSeq_coding	1396	chr3	-	42594393	42623428		GGGGCTCATCCAGAAAGAGCTTTATTGGAAGAGAGAAAGGAAATATTTTGGTCTTTTAAG	9117	Hs.445892	GO:0006888|GO:0015031|GO:0016192|GO:0005783|GO:0005789|GO:0016021|GO:0016020	NP_116752	SEC22 vesicle trafficking protein homolog C (S. cerevisiae)
ASHG19A3A010593	177.711	158.296	7.38917	7.39112	coding	NM_001135178	ZNF397	RefSeq_coding	2644	chr18	+	32820993	32827152		AAAGTGTGGAGCATTCCTTGAGTTCCTGTTGTAGTGAGGTCTTGTCTGTCAGAGAAGTCT	84307	Hs.591061	GO:0003677|GO:0046872|GO:0003700|GO:0008270|GO:0006355|GO:0016032|GO:0005737|GO:0005622|GO:0005634	NP_115723	Zinc finger protein 397
ASHG19A3A045527	81.0773	103.329	6.26234	6.76846	coding	NM_004549	NDUFC2	RefSeq_coding	2498	chr11	-	77779399	77791265		TTCTGGTTGGGGAAGTTGGGAGAAAAGAAAATCAGTATCTCCTAGTCTTCGCCCAGTTTG	4718	Hs.407860	GO:0008137|GO:0006120|GO:0022904|GO:0006810|GO:0005737|GO:0016021|GO:0016020|GO:0005743|GO:0005747|GO:0005747|GO:0005739|GO:0070469	NP_004540	NADH dehydrogenase (ubiquinone) 1, subcomplex unknown, 2, 14.5kDa
ASHG19A3A018008	121.454	108.223	6.84505	6.83736	coding	NM_175842	SMOX	RefSeq_coding	2134	chr20	+	4129449	4168369		TCACCTTTTCTCTTCCAAGTGCCCAGAACAGCCCCTGGATGCTAACAGGGGCGCCGTAAA	54498	Hs.433337	GO:0016491|GO:0046592|GO:0034641|GO:0055114|GO:0006596|GO:0006595|GO:0046208|GO:0006805|GO:0005737|GO:0005829|GO:0005634	NP_787036	Spermine oxidase
ASHG19A3A008799	137.576	185.852	7.02008	7.62154	coding	NM_001003716	RECQL5	RefSeq_coding	3710	chr17	-	73644944	73663269		ATCTTGAGATGGAAGAGCAGCCTTGTGTTTAGACCTGGATTGAATTGGGCCCTGTTGTTT	9400	Hs.632229	GO:0005524|GO:0008026|GO:0003678|GO:0016787|GO:0003676|GO:0000166|GO:0006259|GO:0006310|GO:0006281|GO:0005737|GO:0005737|GO:0031965|GO:0005730|GO:0005654|GO:0005634	NP_004250	RecQ protein-like 5
ASHG19A3A001072	863.367	921.909	9.66402	9.93084	coding	NM_001018677	FNTA	RefSeq_coding	1509	chr8	+	42911441	42940923		ACTCGCCCTCCTATGTCCTGTACAGGCATTTCCGGAGAGTTCTTTTGAAGTCACTTCAGA
ASHG19A3A045419	6395.16	6657.79	12.5572	12.7805	coding	NM_181843	NUDT8	RefSeq_coding	834	chr11	-	67395409	67397401		TGGCTTCACCCTGTCAGGCCAGCTCCACTCCAGGACTGAATAAAGGTCTTTGACAGCTCT	254552	Hs.433329	GO:0016787|GO:0046872|GO:0005739	NP_862826	Nudix (nucleoside diphosphate linked moiety X)-type motif 8
ASHG19A3A026872	89.8131	95.1999	6.41226	6.64517	coding	NM_019072	SGTB	RefSeq_coding	5453	chr5	-	64961756	65017941		TGCCCCTTTCAAACTCAGTGCCTGAAGATGTGGGAAAAGCTGACCAATTAAAAGATGAAG	54557	Hs.482301	GO:0005488	NP_061945	Small glutamine-rich tetratricopeptide repeat (TPR)-containing, beta
ASHG19A3A037009	336.615	143.471	8.30604	7.24478	coding	NM_032272	MAF1	RefSeq_coding	1828	chr8	+	145159304	145162515		AAAGACATGAAGCTATTGGAGAACTCGAGCTTTGAAGCCATCAACTCACAGCTGACTGTG	84232	Hs.19673	GO:0030528|GO:0016480|GO:0005737|GO:0005622|GO:0005634	NP_115648	MAF1 homolog (S. cerevisiae)
ASHG19A3A019328	169.282	151.029	7.31828	7.32363	coding	NM_020132	AGPAT3	RefSeq_coding	6555	chr21	+	45285115	45407474		TGTCCAGCCGGAAGCCCTGAGGGCAGCTGTTCCCACTGGCTCTGCTGACCTTGTGCCTTG	56894	Hs.248785	GO:0003841|GO:0008415|GO:0016740|GO:0008152|GO:0008654|GO:0005783|GO:0005789|GO:0016021|GO:0005886	NP_064517	1-acylglycerol-3-phosphate O-acyltransferase 3
ASHG19A3A024911	59.9676	71.8164	5.82354	6.24497	coding	NM_001128424	FAM198B	RefSeq_coding	4809	chr4	-	159045732	159094202	NM_016613,	CATCATTCTTTGGGATGCATCTTTATCTTCAGCAAGTAATGACACCCATTCTTCTGTTAA	51313	Hs.567498	GO:0005794|GO:0000139|GO:0016021|GO:0016020	NP_057697	Family with sequence similarity 198, member B
ASHG19A3A022969	143.207	101.808	7.07663	6.74411	coding	NM_007072	HHLA2	RefSeq_coding	2689	chr3	+	108021331	108097125		TTTTGGTGCCCTCTGCGATTTTGGCAGCTTTTCTGCTGATTTGGAGCGTAAAATGTTGCA	11148	Hs.252351	GO:0003674|GO:0008150|GO:0005575|GO:0016021|GO:0016020	NP_009003	HERV-H LTR-associating 2
ASHG19A3A050885	1140.64	1221.9	10.0704	10.3436	coding	NM_145113	MAX	RefSeq_coding	2169	chr14	-	65541844	65569227		TCACTTCTCTTCCTCCCTCATGGAAGATGCAAGTAAAAGGAAATGCAAGTAACCACCTGG	4149	Hs.285354	GO:0003677|GO:0005515|GO:0003700|GO:0003713|GO:0003712|GO:0030528|GO:0006366|GO:0071339|GO:0005737|GO:0005730|GO:0005634	NP_932061	MYC associated factor X
ASHG19A3A020817	306.362	193.643	8.17281	7.6795	coding	NM_001145293	NGLY1	RefSeq_coding	2545	chr3	-	25760435	25824989		GCCTAAAACTGACCACGTTAAAGGAGATTGGAAAAACATTTTTAAGGATTTCAAAGAGAC	55768	Hs.720620	GO:0016787|GO:0046872|GO:0000224|GO:0005515|GO:0006516|GO:0005737	NP_060767	N-glycanase 1
ASHG19A3A023435	230.684	197.201	7.76437	7.70619	coding	NM_015508	TIPARP	RefSeq_coding	4047	chr3	+	156392378	156424529		ATTTACCACACAGTCTGGAAATTCTTCTGTAGGGACCACTTTGGATGGAGAGAGTATCCC	25976	Hs.12813	GO:0003950|GO:0046872|GO:0003676|GO:0005515|GO:0016757|GO:0008270|GO:0008209|GO:0008210|GO:0060325|GO:0008585|GO:0030097|GO:0001822|GO:0044236|GO:0006807|GO:0060021|GO:0048008|GO:0009791|GO:0006471|GO:0048705|GO:0048745|GO:0001570	NP_056323	TCDD-inducible poly(ADP-ribose) polymerase
ASHG19A3A041239	11080.1	14780.8	13.3616	13.9165	coding	NM_003022	SH3BGRL	RefSeq_coding	2090	chrX	+	80457302	80554042		TTCTTTGAAGCCAGAGAAAATAATGCAGTGTATGCCTTCTTAGGCTTGACAGCCCCACCT	6451	Hs.108029	GO:0017124|GO:0005070|GO:0005737|GO:0005634	NP_003013	SH3 domain binding glutamic acid-rich protein like
ASHG19A3A002647	31526.6	28563.7	14.8904	14.8565	coding	NM_001143919	LTB4R	RefSeq_coding	2723	chr14	+	24780704	24787241		CTGTCCCTTTCCACCCCCCACCCACCCTCCAGAGGTCCTCCCGACGGCCATGAACACTAC	1241	Hs.567248	GO:0001632|GO:0004974|GO:0000166|GO:0004872|GO:0007186|GO:0007200|GO:0006928|GO:0006955|GO:0006954|GO:0006936|GO:0005887|GO:0005886|GO:0005886	NP_858043	Leukotriene B4 receptor
ASHG19A3A018192	2681.61	3002.43	11.3005	11.631	coding	NM_080625	C20orf160	RefSeq_coding	2532	chr20	+	30598244	30619984		TAAACAGTGTAGAAGGTCTTTTTAAGGCTCTAAATGTCAGGGTCTCCCATCCCCTGATGC	140706	Hs.382151		NP_542192	Chromosome 20 open reading frame 160
ASHG19A3A036055	184.575	187.361	7.44568	7.63162	coding	NM_001099751	SYBU	RefSeq_coding	3094	chr8	-	110586409	110657822		AACTCGTTTTTCTGAGTTCAATTCCAGTGCTCTTCCCTTAGCAGTGTGCTGGAGCTACTT	55638	Hs.390738	GO:0005794|GO:0000139|GO:0005737|GO:0016023|GO:0005856|GO:0016021|GO:0016020	NP_060256	Syntabulin (syntaxin-interacting)
ASHG19A3A005836	451.062	253.472	8.72617	8.07012	coding	NM_134447	C19orf2	RefSeq_coding	2260	chr19	+	30433424	30506611		GCGGCTGCGCGAGGAGCAGGAAAAGGAAGAAGGTAGATAATGACTATAATGCCCTTCGAG	8725	Hs.466391	GO:0003714|GO:0051082|GO:0006457|GO:0006357|GO:0009615|GO:0005665|GO:0005737|GO:0005634|GO:0016272	NP_604431	Chromosome 19 open reading frame 2
ASHG19A3A003013	1028.76	949.854	9.92383	9.97441	coding	NM_001159675	SYNCRIP	RefSeq_coding	2560	chr6	-	86323692	86351169	NM_001159674,	TTGAATATGAAGATCACAAAACAGCTGCCCAGGTAAAAGTGCTGTTTGTACGCAACCTTG	10492	Hs.571177	GO:0003723|GO:0000166|GO:0008143|GO:0005515|GO:0070934|GO:0006396|GO:0008380|GO:0044419|GO:0000398|GO:0070937|GO:0071013|GO:0005737|GO:0005783|GO:0071204|GO:0005792|GO:0005654|GO:0005634|GO:0030529	NP_006363	Synaptotagmin binding, cytoplasmic RNA interacting protein
ASHG19A3A033879	139.033	137.932	7.03549	7.18979	coding	NM_001040167	LFNG	RefSeq_coding	2384	chr7	+	2559478	2568061	NM_001040168,	TCAAGACCACCAAAAAGTTCCACCGCGCGCGCCTCGACCTGCTGCTGGAGACCTGGATCT	3955	Hs.159142	GO:0033829|GO:0003674|GO:0016757|GO:0007386|GO:0007143|GO:0009887|GO:0001541|GO:0007389|GO:0005794|GO:0000139|GO:0005576|GO:0030173|GO:0016021|GO:0016020	NP_002295	LFNG O-fucosylpeptide 3-beta-N-acetylglucosaminyltransferase
ASHG19A3A025890	289.384	359.912	8.0936	8.58618	coding	NM_006323	SEC24B	RefSeq_coding	4649	chr4	+	110354970	110461614		GAATATGTTAATAACCAAGCTAGCTCCGCACCAACTCCCTTGTCATCAACTTCCGATGAT	10427	Hs.292472	GO:0005515|GO:0005215|GO:0008270|GO:0048208|GO:0006888|GO:0016044|GO:0044267|GO:0006886|GO:0043687|GO:0018279|GO:0016192|GO:0030127|GO:0012507|GO:0005794|GO:0000139|GO:0005737|GO:0005829|GO:0005783|GO:0005789|GO:0016020|GO:0048471	NP_006314	SEC24 family, member B (S. cerevisiae)
ASHG19A3A007812	17341.7	15019.8	14.0156	13.9415	coding	NM_002532	NUP88	RefSeq_coding	2381	chr17	-	5289419	5322996		TGTTGAGTCTTCCAAAACCCACCATTATTCTCAGTGCCTACCAGCGAAAGTGCATTCAGT	4927	Hs.584784	GO:0005215|GO:0005975|GO:0015758|GO:0008645|GO:0051028|GO:0015031|GO:0010827|GO:0055085|GO:0016032|GO:0005829|GO:0005829|GO:0005643|GO:0005730|GO:0005634	NP_002523	Nucleoporin 88kDa
ASHG19A3A010658	218.119	263.589	7.68737	8.12672	coding	NM_018696	ELAC1	RefSeq_coding	2233	chr18	+	48494386	48514489		GGTTTTCAGTCGTGGAAAAGAAACGCCCAGGTAAACTCAATGCACAGAAACTTAAAGACC	55520	Hs.657360	GO:0004519|GO:0016891|GO:0016787|GO:0046872|GO:0042779|GO:0008033|GO:0005634	NP_061166	ElaC homolog 1 (E. coli)
ASHG19A3A048102	6952.49	7950.27	12.6872	13.0314	coding	NM_015918	POP5	RefSeq_coding	801	chr12	-	121016848	121019197		CATACTTGGAGAACAAAGGACACCGTTACCCATGCTTTTTCAACACATTACATGTGGGAG	51367	Hs.279913	GO:0016787|GO:0005515|GO:0004526|GO:0004540|GO:0016070|GO:0008033|GO:0005655|GO:0005730|GO:0005634	NP_937845	Processing of precursor 5, ribonuclease P/MRP subunit (S. cerevisiae)
ASHG19A3A004197	185.226	175.808	7.45002	7.54308	coding	NM_003852	TRIM24	RefSeq_coding	3905	chr7	+	138145078	138270330		AGCTCAATTACGGCTCCAGCATATGCAGCAACAGCAACCGCCTCCACGTTTGATAAACTT	8805	Hs.490287	GO:0070063|GO:0003682|GO:0034056|GO:0070577|GO:0016922|GO:0016874|GO:0046872|GO:0035064|GO:0002039|GO:0005515|GO:0004672|GO:0005102|GO:0043565|GO:0003713|GO:0016986|GO:0016564|GO:0004842|GO:0008270|GO:0055074|GO:0071391|GO:0008285|GO:0045892|GO:0010628|GO:0046777|GO:0030163|GO:0016567|GO:0042981|GO:0031647|GO:0070562|GO:0006366|GO:0006352|GO:0005737|GO:0005622|GO:0005719|GO:0005634|GO:0005726	NP_056989	Tripartite motif-containing 24
ASHG19A3A001651	86.0291	91.5167	6.34654	6.58647	coding	NM_001097633	GCNT1	RefSeq_coding	5488	chr9	+	79074067	79122330		CTCCGGGGTCAGACGCCCACTCCAGATTTCTTTAAAGACTCGTGCAGCACATCATTATCG	2650	Hs.521568	GO:0003829|GO:0016757|GO:0006493|GO:0032868|GO:0005794|GO:0000139|GO:0005615|GO:0016021|GO:0016020	NP_001481	Glucosaminyl (N-acetyl) transferase 1, core 2
ASHG19A3A048386	1078.71	435.74	9.99054	8.86397	coding	NM_001310	CREBL2	RefSeq_coding	3748	chr12	+	12764830	12798041		AATCTCAGCAGAACTCAAGCAGGCATACCAAGGCTGGGAAGACAGATGCTAATAGCAATT	1389	Hs.591156	GO:0046983|GO:0043565|GO:0003700|GO:0007049|GO:0006355|GO:0007165|GO:0006351|GO:0005634	NP_001301	CAMP responsive element binding protein-like 2
ASHG19A3A048665	9285.89	5953.86	13.1091	12.6244	coding	NM_014620	HOXC4	RefSeq_coding	2300	chr12	+	54410641	54449813		AGAAATGACGTCAGAATCATTTGCATCCCGCTGCCTCTACCTGCCTGGTCCAGCTGGGAC	3221	Hs.549040	GO:0043565|GO:0003700|GO:0030528|GO:0009952|GO:0051216|GO:0048562|GO:0007275|GO:0006355|GO:0006351|GO:0005634	NP_705897	Homeobox C4
ASHG19A3A019814	12051.5	8052.86	13.4831	13.0485	coding	NM_015374	SUN2	RefSeq_coding	3908	chr22	-	39130734	39151947		TTTTTTATCTCCAGATCCTAATTTATGCCTATGCAAAAAATAAATGACGCCCAAGAGCTG	25777	Hs.517622	GO:0005521|GO:0008017|GO:0005515|GO:0051642|GO:0090286|GO:0007052|GO:0006998|GO:0090292|GO:0007097|GO:0031022|GO:0030335|GO:0034993|GO:0000794|GO:0005768|GO:0010008|GO:0016021|GO:0016020|GO:0000784|GO:0005635|GO:0005635|GO:0005637|GO:0031965|GO:0005634	NP_056189	Sad1 and UNC84 domain containing 2
ASHG19A3A016149	166.044	163.258	7.29227	7.43321	coding	NM_144978	CCDC138	RefSeq_coding	2196	chr2	+	109403218	109492847		TGAAAGCAAGCATTGTAGAACACCATTGGGCAGCTTATTCAAGCACGTAAATGTGAATTG	165055	Hs.362702		NP_659415	Coiled-coil domain containing 138
ASHG19A3A036264	373.619	467.73	8.45567	8.96354	coding	NM_003923	FOXH1	RefSeq_coding	2193	chr8	-	145699116	145701718		TAAATACTCCCCCATTTGTTAAATGGGGTCCTGAAACCTGACCAGGGAAGACGGGATAAA	8928	Hs.708365	GO:0008301|GO:0003677|GO:0070412|GO:0003690|GO:0010843|GO:0005515|GO:0019904|GO:0043565|GO:0003700|GO:0003705|GO:0003704|GO:0016566|GO:0016563|GO:0008134|GO:0048318|GO:0001568|GO:0042074|GO:0007368|GO:0035054|GO:0021508|GO:0001947|GO:0010553|GO:0045944|GO:0051090|GO:0010159|GO:0006351|GO:0007179|GO:0007179|GO:0032444|GO:0005634|GO:0005667	NP_003914	Forkhead box H1
ASHG19A3A010279	111.156	148.972	6.7225	7.30321	coding	NM_020964	KIAA1632	RefSeq_coding	12715	chr18	-	43427574	43547305		AAGTGTTGCATAACCCATCAGGGGTCTTTCATTTTATGCAATCCCTTGCCCTGCTGATGT	57724	Hs.514843		NP_066015	KIAA1632
ASHG19A3A049113	83061.3	95682.1	16.3454	16.5275	coding	NM_004373	COX6A1	RefSeq_coding	548	chr12	+	120875903	120878529		GTATACTGGTCTCCCATCCCTTTGCTTGTGGCAGGAGATGGCTTAAATAAATAACTTAAA	1337	Hs.369624	GO:0004129|GO:0006091|GO:0022904|GO:0016020|GO:0005743|GO:0005751|GO:0005739	NP_004364	Cytochrome c oxidase subunit VIa polypeptide 1
ASHG19A3A006147	675.058	347.913	9.30572	8.53308	coding	NM_152562	CDCA2	RefSeq_coding	3735	chr8	+	25316512	25365425		TCCGAGCATCCGAAGACTGGGTTCAGGTTATTTCAGTTCAAATGGCAAACTGGAAGAAGT	157313	Hs.33366	GO:0007049|GO:0051301|GO:0007067|GO:0005737|GO:0005730|GO:0005634	NP_689775	Cell division cycle associated 2
ASHG19A3A023288	1054.25	1036.88	9.96008	10.1013	coding	NM_001040061	C3orf72	RefSeq_coding	4075	chr3	+	138666075	138672830		TCGGTCTCCCCAAGATGTGCCTTCACATGGCTGTCCGGCATTCGAAGGCTCAGAAAACAG	401089	Hs.591303		NP_001035150	Chromosome 3 open reading frame 72
ASHG19A3A047709	56279.7	51426.1	15.76	15.67	coding	NM_006601	PTGES3	RefSeq_coding	1932	chr12	-	57057126	57082078		GTAGATGCACTTTGCAGCAGTTGGAAAAGAAAGTGTTGTGTGATTTGATTGAAATAAAAC	10728	Hs.50425	GO:0016853|GO:0050220|GO:0050220|GO:0005515|GO:0003720|GO:0051082|GO:0070389|GO:0006633|GO:0042446|GO:0001516|GO:0006692|GO:0007165|GO:0000723|GO:0000781|GO:0005737|GO:0005829|GO:0005697	NP_006592	Prostaglandin E synthase 3 (cytosolic)
ASHG19A3A005082	254.442	220.001	7.90911	7.86645	coding	NM_018922	PCDHGB1	RefSeq_coding	4590	chr5	+	140729827	140892546		TTATGACCCTTCTTTGTCTTCGCACCAAGCCCCGCCCAACACGGACTGGCGTTTCTCTCA	5098	Hs.368160	GO:0005509|GO:0016339|GO:0007155|GO:0007156|GO:0016021|GO:0016020|GO:0005886	NP_115779	Protocadherin gamma subfamily C, 3
ASHG19A3A045571	1310.45	876.75	10.2659	9.8601	coding	NM_001814	CTSC	RefSeq_coding	1924	chr11	-	88026760	88070941		TATACTAACCAACAATTCTCAGACCCCAATCCTAAGCCCTCAGGAGGTTGTGTCTTGTAG	1075	Hs.128065	GO:0004197|GO:0008233|GO:0006955|GO:0006508|GO:0005764	NP_680475	Cathepsin C
ASHG19A3A040194	2489.19	1734.08	11.1897	10.8522	coding	NM_019007	ARMCX6	RefSeq_coding	1865	chrX	-	100870113	100872991		AGGTTTCGGCACAAGTTTCAGCGAGAGAAGGAGAAAACTGCCTTGGTTGGAACCTTGCAG	54470	Hs.83530	GO:0016021|GO:0016020	NP_061880	Armadillo repeat containing, X-linked 6
ASHG19A3A008694	6944.65	10266.5	12.6843	13.3992	coding	NM_002928	RGS16	RefSeq_coding	2432	chr1	-	182567758	182573548		GTTTCCTAGATATGAATGATGTTTGCAATCCCCATTTTCCTGTTTCAGCATGTTATATTC	6004	Hs.413297	GO:0005096|GO:0005516|GO:0004871|GO:0009968|GO:0008277|GO:0007601|GO:0005737|GO:0005624|GO:0045121|GO:0005886	NP_002919	Regulator of G-protein signaling 16
ASHG19A3A021747	87.061	78.7069	6.36415	6.37696	coding	NM_001136537	BTBD19	RefSeq_coding	1572	chr1	+	45274153	45279801		GCCTTCCTGGCAGTGCTGGAGTTCCTATATACCAACAGTGTCAAGCTGTACCGCCACTCT	149478	Hs.729385		NP_001130009	BTB (POZ) domain containing 19
ASHG19A3A031996	882.779	905.972	9.69568	9.90696	coding	NM_001127621	GALE	RefSeq_coding	1626	chr1	-	24122088	24126060		GACAGAACCCCTTCCTGCGACCCTGGAGTCCCAATCGTGCTGCCATTTTCCTTCTGCCCA	2582	Hs.632380	GO:0003978|GO:0003978|GO:0005488|GO:0050662|GO:0016853|GO:0042803|GO:0005975|GO:0044237|GO:0019388|GO:0019388|GO:0005829	NP_001121093	UDP-galactose-4-epimerase
ASHG19A3A015020	29144.8	32319.1	14.7693	15.0308	coding	NM_015680	C2orf24	RefSeq_coding	2100	chr2	-	220036619	220041702		TTGTATCAGGGTTTTTCACGCTTTTGTAGAACTGAGGTTTCAATAAACAGTTTCAGTTGC	27013	Hs.4973	GO:0016021|GO:0016020	NP_056495	Chromosome 2 open reading frame 24
ASHG19A3A030449	171.505	175.092	7.33842	7.53547	coding	NM_001017408	GOPC	RefSeq_coding	4580	chr6	-	117881434	117923681		TACATTTGCATCGTCACAAAACTGTGATCCGAGCCTGCAGAGGACGTAATGACTTGAAAC	57120	Hs.191539	GO:0042980|GO:0005515|GO:0005083|GO:0006888|GO:0006893|GO:0045176|GO:0043004|GO:0051260|GO:0015031|GO:0007289|GO:0005794|GO:0000139|GO:0030054|GO:0042995|GO:0005737|GO:0030425|GO:0005624|GO:0005886|GO:0014069|GO:0045211|GO:0045202|GO:0019717|GO:0030140|GO:0030140	NP_065132	Golgi-associated PDZ and coiled-coil motif containing
ASHG19A3A049537	6396.49	9538.23	12.558	13.287	coding	NM_001984	ESD	RefSeq_coding	1208	chr13	-	47345391	47371367		AAATTTGCTGTCTACTTACCACCAAAGGCAGAAACAGGAAAGTGCCCTGCACTGTATTGG	2098	Hs.432491	GO:0018738|GO:0004091|GO:0008150|GO:0005737|GO:0016023	NP_001975	Esterase D
ASHG19A3A009493	132.846	148.668	6.97191	7.29993	coding	NM_001024809	RARA	RefSeq_coding	3405	chr17	+	38498341	38513894		TAGTGGTGGATTTTTATAACCAGAACCGGGCCTGTTTGCTCCCAGAGAAGGGGCTCCCCG	5914	Hs.654583	GO:0031490|GO:0019899|GO:0046872|GO:0005515|GO:0019904|GO:0046982|GO:0005102|GO:0001972|GO:0003708|GO:0044323|GO:0043565|GO:0003700|GO:0003707|GO:0016563|GO:0003713|GO:0003713|GO:0003714|GO:0008270|GO:0043277|GO:0071391|GO:0071300|GO:0030520|GO:0010467|GO:0032582|GO:0030853|GO:0032689|GO:0032720|GO:0045630|GO:0051099|GO:0045787|GO:0008284|GO:0043193|GO:0043193|GO:0032736|GO:0032753|GO:0032754|GO:…	NP_001138774	Retinoic acid receptor, alpha
ASHG19A3A023895	622.177	1015.65	9.18489	10.0738	coding	NM_001003679	LEPR	RefSeq_coding	5227	chr1	+	65886247	66101110		CCCACAGATTCTTGATTTGTAGTTGTTTGGCAGGATTTTTCTTTGTGATATAATCACTTC	3953	Hs.723178	GO:0004896|GO:0005515|GO:0004888|GO:0007166|GO:0006112|GO:0007275|GO:0005576|GO:0016021|GO:0005886	NP_002294	Leptin receptor
ASHG19A3A010294	548.273	873.902	9.00205	9.85654	coding	NM_004671	PIAS2	RefSeq_coding	2360	chr18	-	44392060	44497466		CCTGAGAGATGGATTTCACTTTCATACGTTAATGGATGGAGTCTACAAATCAGTGAAAAA	9063	Hs.658013	GO:0003677|GO:0003702|GO:0019789|GO:0050681|GO:0046872|GO:0005515|GO:0016563|GO:0003713|GO:0008270|GO:0030521|GO:0060766|GO:0010552|GO:0045893|GO:0016925|GO:0045667|GO:0016605|GO:0016607|GO:0005634	NP_775298	Protein inhibitor of activated STAT, 2
ASHG19A3A005901	555.709	635.727	9.02093	9.40194	coding	NM_138937	REG3A	RefSeq_coding	784	chr2	-	79384132	79386879		AAACCATACCATATCCCACCAGAGAGTCGCAGACACTATGCTGCCTCCCATGGCCCTGCC	5068	Hs.567312	GO:0005488|GO:0005529|GO:0006953|GO:0008283|GO:0007157|GO:0006954|GO:0007275|GO:0005737|GO:0005576|GO:0005615|GO:0005625	NP_620355	Regenerating islet-derived 3 alpha
ASHG19A3A026158	581.096	406.688	9.08675	8.76277	coding	NM_002858	ABCD3	RefSeq_coding	3616	chr1	+	94883932	94984218		TTTGCGAATGTCTCAAGCTCTGGGTCGAATAGTTTTGGCTGGGCGTGAAATGACTAGATT	5825	Hs.700576	GO:0005524|GO:0016887|GO:0042626|GO:0000166|GO:0005515|GO:0043621|GO:0015910|GO:0007031|GO:0042493|GO:0055085|GO:0005829|GO:0016021|GO:0005779|GO:0043231|GO:0016020|GO:0005743|GO:0005739|GO:0005778|GO:0005777	NP_002849	ATP-binding cassette, sub-family D (ALD), member 3
ASHG19A3A002334	146.492	479.814	7.11202	9.00291	coding	NM_001135652	EIF2AK2	RefSeq_coding	2266	chr2	-	37333698	37374965		AAACAAAGTATACTGTGGACAAGAGGAAGGCGGAGCGTGAAGTAAAAGCATTGGCAAAAC	5610	Hs.131431	GO:0005524|GO:0003725|GO:0004694|GO:0000166|GO:0005515|GO:0008601|GO:0004674|GO:0030683|GO:0044419|GO:0019054|GO:0008285|GO:0033689|GO:0046777|GO:0006468|GO:0009615|GO:0019058|GO:0019048|GO:0005829|GO:0005622	NP_002750	Eukaryotic translation initiation factor 2-alpha kinase 2
ASHG19A3H0000512	323.801	335.645	8.25189	8.47991	coding	NM_002144_intron2+	NM_002144	HOX cluster	451	chr17	+	46607237	46607689		CTCCCGGGGCTGGCTCTGGACCTCCATTTGCCATTCTGCCCAAGTACAGTTGTCAAAGTT
ASHG19A3A028938	253.525	286.606	7.90432	8.25012	coding	NM_018935	PCDHB15	RefSeq_coding	2661	chr5	+	140625146	140627799		TTCATTCCTGAAGGGTGATATGAAAGTTAACCCCACCTAATAAACATAACTCTAATTCTG	56121	Hs.130757	GO:0005509|GO:0007155|GO:0007156|GO:0007399|GO:0005887|GO:0005886	NP_061758	Protocadherin beta 15
ASHG19A3A017222	168.661	168.403	7.3126	7.48044	coding	NM_001167602	NEU4	RefSeq_coding	2551	chr2	+	242752029	242758739		TGTGCGTGCTCACGCTCGGCTCCGTCTGCCTTTGTGCGATCAGACTGAGAGACCCCCCAG	129807	Hs.551747	GO:0004308|GO:0016798|GO:0005515|GO:0008152|GO:0043202|GO:0005764|GO:0005764|GO:0016020|GO:0005739|GO:0019866	NP_542779	Sialidase 4
ASHG19A3A013607	2352.22	1953.88	11.1087	11.025	coding	NM_018693	FBXO11	RefSeq_coding	2567	chr2	-	48039989	48132814		GTCTGCAGTTGTCAGTAAGCCTTTTTAAAGATAGAATTTGTTTACATTCTCTGGACCTTT
ASHG19A3A010747	111.219	115.949	6.72317	6.93702	coding	NM_001168499	CNDP2	RefSeq_coding	4964	chr18	+	72166822	72190687		TAAAGAAGGGAAGTTTAGCCCCAGCCTCTAACTGGTTCCCAAAGTTTTTGTCTCTGAAGC	55748	Hs.149185	GO:0004180|GO:0016805|GO:0046872|GO:0008237|GO:0008233|GO:0005515|GO:0034701|GO:0008152|GO:0006508|GO:0005737	NP_060705	CNDP dipeptidase 2 (metallopeptidase M20 family)
ASHG19A3A024836	576.989	563.134	9.07537	9.23109	coding	NM_138364	PRMT10	RefSeq_coding	2842	chr4	-	148559535	148605280		TACGTTTACAAAATATCTTCCCTTTGGCCATACAAGTGGTGACTGCCATGTCGAACTCGC	90826	Hs.591692	GO:0005488|GO:0008276|GO:0016740|GO:0005737	NP_612373	Protein arginine methyltransferase 10 (putative)
ASHG19A3A031082	313.375	362.121	8.20431	8.596	coding	NM_005495	SLC17A4	RefSeq_coding	3600	chr6	+	25754926	25781402		ATTGCAAGTCTTTGCACACATAGCTGGAGCCATCTCTCCTACTGCTGCTGGATTTTTCAT	10050	Hs.282931	GO:0005436|GO:0015293|GO:0006811|GO:0006796|GO:0006814|GO:0055085|GO:0005887|GO:0016020|GO:0005624	NP_005486	Solute carrier family 17 (sodium phosphate), member 4
ASHG19A3A005428	668.994	978.765	9.29368	10.0187	coding	NM_030801	MAGED4B	RefSeq_coding	2602	chrX	-	51804924	51812368		GGACGCCATTGGAGTTCCCGAGAAGGCTGAGCTCTCATCTCCCTGGGACCCGCAGCATGG	81557	Hs.522650		NP_803881	Melanoma antigen family D, 4B
ASHG19A3A009579	291.166	260.907	8.10277	8.1126	coding	NM_001466	FZD2	RefSeq_coding	1983	chr17	+	42634924	42636907		ATCGAAACCATTTCACTTTTAGGTTGCTTTTTAAAAGAGAACTCTCTGCCCAACACCCCC	2535	Hs.142912	GO:0004930|GO:0030165|GO:0030165|GO:0042813|GO:0017147|GO:0046982|GO:0007199|GO:0007223|GO:0007409|GO:0007420|GO:0060070|GO:0001775|GO:0007267|GO:0071363|GO:0071375|GO:0071305|GO:0007204|GO:0009790|GO:0030855|GO:0008406|GO:0030182|GO:0030825|GO:0090047|GO:0010551|GO:0001944|GO:0045177|GO:0005737|GO:0016021|GO:0032589|GO:0005886	NP_001457	Frizzled homolog 2 (Drosophila)
ASHG19A3A016667	151.571	92.0661	7.16234	6.59526	coding	NM_001042702	DFNB59	RefSeq_coding	1534	chr2	+	179316162	179326107		TAACTTTGACCACAGCTTGATACGTCAGTCAAGGAGCAGCAGAAAGGCAGTATTGTGTGT	494513	Hs.87734	GO:0007605|GO:0043025	NP_001036167	Deafness, autosomal recessive 59
ASHG19A3A004082	879.681	599.306	9.6897	9.31915	coding	NM_002884	RAP1A	RefSeq_coding	1812	chr1	+	112162404	112256100		GTGGAGGAGGCGCCGGACCGGGGGGATCGTCAGTATTTAAACAGATCACATCATGCGTGA	5906	Hs.190334	GO:0005525|GO:0003924|GO:0000166|GO:0005515|GO:0006184|GO:0000186|GO:0007596|GO:0006112|GO:0048011|GO:0050796|GO:0007165|GO:0007264|GO:0005829|GO:0005622|GO:0005886|GO:0005886	NP_002875	RAP1A, member of RAS oncogene family
ASHG19A3A029337	189.858	208.856	7.48344	7.79182	coding	NM_015482	SLC22A23	RefSeq_coding	6159	chr6	-	3269206	3456793		TCATCGGCTTCAGCCAGTTCTCGGACTCGTTCCTCCTGGACCAGCCCAACTTCTGGTGCC	63027	Hs.713588	GO:0005215|GO:0006811|GO:0055085|GO:0016021|GO:0016020	NP_068764	Solute carrier family 22, member 23
ASHG19A3A045366	36388.2	29940.1	15.1034	14.9258	coding	NM_001145138	RELA	RefSeq_coding	2586	chr11	-	65421067	65430443		CAAAGCACTTGGACTCTTGCTCTTTCTACTCTGAACTAATAAATCTGTTGCCAAGCTGGC	5970	Hs.502875	GO:0003677|GO:0051059|GO:0033613|GO:0003682|GO:0042802|GO:0042802|GO:0042301|GO:0010843|GO:0047485|GO:0005515|GO:0032403|GO:0019901|GO:0070491|GO:0003700|GO:0003705|GO:0016563|GO:0008134|GO:0016564|GO:0031625|GO:0002755|GO:0002755|GO:0002756|GO:0002756|GO:0050852|GO:0008063|GO:0007568|GO:0006916|GO:0006916|GO:0006968|GO:0019221|GO:0051607|GO:0001942|GO:0006954|GO:0045087|GO:0044419|GO:0001889|GO:…	NP_068810	V-rel reticuloendotheliosis viral oncogene homolog A (avian)
ASHG19A3A033122	483.154	504.743	8.82205	9.07667	coding	NM_001122951	DARC	RefSeq_coding	1106	chr1	+	159175200	159176288	NM_002036,	AGCAAATCCTAGTTCTCTTCCCACCTGTCAACCTGAATTAAAGTCTACACTGCCTTTGTG	2532	Hs.153381	GO:0019957|GO:0004930|GO:0004950|GO:0004872|GO:0004888|GO:0006952|GO:0006954|GO:0016021|GO:0005886	NP_002027	Duffy blood group, chemokine receptor
ASHG19A3A053036	286.285	165.036	8.07693	7.4496	coding	NM_014249	NR2E3	RefSeq_coding	1999	chr15	+	72102893	72110595		TTTCCGCAAGACCATAGGGAATACTCCAATGGAGAAGCTCCTTTGTGATATGTTCAAAAA	10002	Hs.187354	GO:0004879|GO:0046872|GO:0043565|GO:0003700|GO:0005496|GO:0003707|GO:0008270|GO:0010467|GO:0008285|GO:0000122|GO:0007602|GO:0045872|GO:0045944|GO:0034339|GO:0006355|GO:0050896|GO:0060041|GO:0007165|GO:0006366|GO:0007601|GO:0005654|GO:0005634|GO:0005667	NP_057430	Nuclear receptor subfamily 2, group E, member 3
ASHG19A3A053491	164.615	119.939	7.28064	6.98945	coding	NM_015914	TXNDC11	RefSeq_coding	3047	chr16	-	11772942	11836648		TGAATAACGAGCTGAAGAAAGGACCAGCGCTGTTTCTGTTCATACCTTTTAATCCCCTGG	51061	Hs.313847	GO:0045454|GO:0005783|GO:0005789|GO:0016021|GO:0016020	NP_056998	Thioredoxin domain containing 11
ASHG19A3A018730	1607	1064.44	10.562	10.1396	coding	NM_016940	RWDD2B	RefSeq_coding	1712	chr21	-	30378081	30391685		AAGAATATTCTAGAGTGGGCAAAGGAGCTTTCCCTGTCTGGGTTTAGCATGCCTGGAAAA	10069	Hs.726496	GO:0003674|GO:0008150|GO:0005575	NP_058636	RWD domain containing 2B
ASHG19A3A004489	629.134	380.451	9.2006	8.66318	coding	NM_006362	NXF1	RefSeq_coding	2346	chr11	-	62559597	62572964		CACCTTCCGAGACCAGTCCACCTACATCAGCGCCATTCGCGAACGATTTCCCAAGTTACT	10482	Hs.523739	GO:0003729|GO:0005487|GO:0000166|GO:0005515|GO:0010467|GO:0044419|GO:0006406|GO:0006406|GO:0016973|GO:0006810|GO:0005737|GO:0005829|GO:0005622|GO:0042405|GO:0005643|GO:0016607|GO:0005654|GO:0005634	NP_006353	Nuclear RNA export factor 1
ASHG19A3A016605	6081.99	4926.23	12.4891	12.3467	coding	NM_133646	ZAK	RefSeq_coding	7194	chr2	+	173940564	174091871		CCACAGTGTATTCAGAAATCCAAGTTGGTGTCATACATTTCATTTTGATGTGAACTTTTC	51776	Hs.444451	GO:0005524|GO:0004709|GO:0042802|GO:0000287|GO:0000166|GO:0005515|GO:0004674|GO:0016740|GO:0000077|GO:0007257|GO:0000186|GO:0007049|GO:0007050|GO:0000075|GO:0008219|GO:0030154|GO:0008283|GO:0007010|GO:0007243|GO:0043065|GO:0006468|GO:0009314|GO:0006950|GO:0005737|GO:0005737|GO:0005634	NP_598407	Sterile alpha motif and leucine zipper containing kinase AZK
ASHG19A3A004521	2108.83	1592.99	10.9513	10.7228	coding	NM_006554	MTX2	RefSeq_coding	1399	chr2	+	177134122	177202751		GAAGCCTTCGTCTCCCAGATTGCAGCTGCAGAACCTTGGCCTGAAAATGCTACATTATAT	10651	Hs.470728	GO:0006839|GO:0006626|GO:0015031|GO:0016020|GO:0005741|GO:0005739	NP_006545	Metaxin 2
ASHG19A3A026451	1238.64	638.927	10.1891	9.41021	coding	NM_030782	CLPTM1L	RefSeq_coding	2164	chr5	-	1318006	1345002		ATTTTTGTAGATACCAACTTATACTTCCTGGCGCTGACCTTCTTTGTCGCAGCGTTCCAT	81037	Hs.444673	GO:0006915|GO:0016021|GO:0016020	NP_110409	CLPTM1-like
ASHG19A3A002026	509.149	268.763	8.89455	8.1553	coding	NM_001127586	ING4	RefSeq_coding	1313	chr12	-	6759704	6772308		AGAAGAAGTTAAAGCTCGTGCGCACTGTTCCATTGAGTGGTTCCATTTTGCCTGTGTGGG	51147	Hs.524210	GO:0046872|GO:0005515|GO:0003713|GO:0008270|GO:0006978|GO:0006260|GO:0006915|GO:0007049|GO:0007050|GO:0016568|GO:0043966|GO:0043983|GO:0043984|GO:0043981|GO:0043982|GO:0008285|GO:0045926|GO:0045892|GO:0043065|GO:0006473|GO:0000123|GO:0005634	NP_057246	Inhibitor of growth family, member 4
ASHG19A3A002268	561.483	501.237	9.0352	9.06684	coding	NM_001134671	DERL1	RefSeq_coding	3119	chr8	-	124025567	124054648		GATTCAACTATATCATCGGAGGCTCATACCCAATGGACTTGGGAGGAAGAAATTTTCTAT	79139	Hs.241576	GO:0042288|GO:0005515|GO:0004872|GO:0030433|GO:0030968|GO:0045184|GO:0044419|GO:0019060|GO:0015031|GO:0006986|GO:0030970|GO:0005783|GO:0005783|GO:0005789|GO:0030176|GO:0016021|GO:0016020	NP_077271	Der1-like domain family, member 1
ASHG19A3A006031	69.2827	77.4094	6.03601	6.35468	coding	NM_145762	GFRA4	RefSeq_coding	1517	chr20	-	3639939	3644046		CTGCGCGCCTACGCGGGCCTCGTGGGGTCCCCGCAGGCACCGCCGTCACCCCTAACTACG	64096	Hs.302025	GO:0004872|GO:0030279|GO:0031225|GO:0005576|GO:0005886	NP_665705	GDNF family receptor alpha 4
ASHG19A3A024786	383.823	142.328	8.49538	7.23294	coding	NM_015130	TBC1D9	RefSeq_coding	5507	chr4	-	141541936	141677471		AAGTGATATTCCAGTTGGCCCTAGCTGTGCTGGATGCAAATGTGGACAAACTGTTGAACT	23158	Hs.480819	GO:0005096|GO:0005097|GO:0005509|GO:0032313|GO:0005622	NP_055945	TBC1 domain family, member 9 (with GRAM domain)
ASHG19A3A004755	395.66	389.794	8.53814	8.69893	coding	NM_014719	FAM115A	RefSeq_coding	4076	chr7	-	143550048	143599172	ENST00000440891,	ACTGCCTGAAGCTGCTGCCTCTGCCGACCTGAAGATACAGATTGGCTGCCACACAGATGA	9747	Hs.406492		NP_055534	Family with sequence similarity 115, member A
CUST_8_PI418767722	142144	174340	17.1512	17.3462	coding	NM_021009	UBC	RefSeq_coding	2602	chr12	-	125396193	125399577		GGGTGTCTAAGTTTCCCCTTTTAAGGTTTCAACAAATTTCATTGCACTTTCCTTTCAATA	7316	Hs.520348	GO:0005515|GO:0006977|GO:0006281|GO:0000082|GO:0007249|GO:0007254|GO:0000216|GO:0002755|GO:0002755|GO:0002756|GO:0002756|GO:0016070|GO:0000084|GO:0050852|GO:0008063|GO:0000187|GO:0031145|GO:0031145|GO:0006916|GO:0006915|GO:0006915|GO:0000075|GO:0016044|GO:0016197|GO:0007173|GO:0008624|GO:0045087|GO:0016071|GO:0000278|GO:0042059|GO:0032480|GO:0051436|GO:0048011|GO:0043123|GO:0051092|GO:0051437|GO:…	NP_066289	Ubiquitin C
ASHG19A3A010929	105.638	116.865	6.6505	6.94841	coding	NM_000635	RFX2	RefSeq_coding	4114	chr19	-	5993175	6110664		GAAAACCTCCAAAAAAGCGAAGGAATCACATCACACAAAAGCGGTTTACTCAACAGCCAT	5990	Hs.465709	GO:0003677|GO:0030528|GO:0006355|GO:0005634	NP_602309	Regulatory factor X, 2 (influences HLA class II expression)
ASHG19A3A013169	3949.87	3590.5	11.8702	11.8865	coding	NM_173548	ZNF584	RefSeq_coding	2293	chr19	+	58920062	58929690		GGACTGTCTCATACTGCTCTGGACTATGTGGTAATAAAGGCTTTATTGTTTAAGCCGCTT	201514	Hs.439551	GO:0003677|GO:0046872|GO:0008270|GO:0006355|GO:0005622|GO:0005634	NP_775819	Zinc finger protein 584
CUST_11_PI426247286	9142.55	10238.1	13.0865	13.3918	coding	NM_014620_intron3+	NM_014620	HOX cluster	487	chr12	+	54448145	54448633		TTTAAGCTTGATGACTTTATTTCCACCACTCCCTCCTCCTGTTTCTCAGAGCTGAGGATG
ASHG19A3A001354	175.759	159.852	7.37277	7.40547	coding	NM_001040195	AGTRAP	RefSeq_coding	1144	chr1	+	11796141	11810827		TCGGGATGGAGCTGCCTGCTGTGAACCTGAAGGGGCTGCATTGTATTCTCAGGCTCCTAT	57085	Hs.464438	GO:0004945|GO:0005515|GO:0008217|GO:0001666|GO:0005794|GO:0000139|GO:0005938|GO:0031410|GO:0030659|GO:0005783|GO:0005789|GO:0016021|GO:0005886	NP_065083	Angiotensin II receptor-associated protein
ASHG19A3A004153	172.751	244.664	7.34852	8.01695	coding	NM_003475	RASSF7	RefSeq_coding	1554	chr11	+	561449	564024		TGACAGGGGCCCTCCTGGCACTCAGGGCCCTCTGCCTCCAGCCAGAGAGGAGTCCCTCCT	8045	Hs.72925	GO:0003677|GO:0005515|GO:0006355|GO:0007165|GO:0005634	NP_003466	Ras association (RalGDS/AF-6) domain family (N-terminal) member 7
ASHG19A3A027363	836.149	900.833	9.61695	9.89924	coding	NM_001009185	ACSL6	RefSeq_coding	3047	chr5	-	131289151	131347349		CAGGACGATGTGCTCATCTCCTTCCTGCCTCTGGCTCACATGTTTGAGAGAGTAATCCAG	23305	Hs.14945	GO:0005524|GO:0016874|GO:0004467|GO:0004467|GO:0000166|GO:0006637|GO:0044255|GO:0006631|GO:0035338|GO:0007405|GO:0019432|GO:0005783|GO:0005789|GO:0016021|GO:0005792|GO:0005741|GO:0005739|GO:0005778|GO:0005777|GO:0005886	NP_056071	Acyl-CoA synthetase long-chain family member 6
ASHG19A3A048409	1043.33	652.76	9.9451	9.44059	coding	NM_018179	ATF7IP	RefSeq_coding	4661	chr12	+	14518610	14651696		ATATGTTGTAAACAATGGACTAACCCTGGGATCAACAGGACCTCAGCTCACAGTGCATCA	55729	Hs.729180	GO:0016887|GO:0005515|GO:0003714|GO:0006306|GO:0044419|GO:0000122|GO:0045892|GO:0045893|GO:0045898|GO:0005634|GO:0005667	NP_060649	Activating transcription factor 7 interacting protein
ASHG19A3A038168	1386.07	1007.32	10.349	10.0618	coding	NM_181491	MED22	RefSeq_coding	3887	chr9	-	136207755	136214972		AAGGCAGGTCTGGGGTGTGGTCGTGTTTTCTTAACTCTGCTTCTGTCTTGCTCTCCCCTC	6837	Hs.78354	GO:0016455|GO:0005515|GO:0006357|GO:0005737|GO:0016592|GO:0005634|GO:0005625	NP_852468	Mediator complex subunit 22
ASHG19A3A051412	4778.05	4801.3	12.1473	12.3088	coding	NM_001003803	ATP5S	RefSeq_coding	1567	chr14	+	50779046	50792668		GGAAATAATATCCTGTGGGAATATCACAGACAAAGGCATCATTGCTTTGCGTCATTTAAG	27109	Hs.438489	GO:0015078|GO:0006754|GO:0006811|GO:0015992|GO:0016020|GO:0005743|GO:0005739|GO:0045263	NP_056499	ATP synthase, H+ transporting, mitochondrial Fo complex, subunit s (factor B)
ASHG19A3A052042	123.312	100.96	6.86841	6.73084	coding	NM_016642	SPTBN5	RefSeq_coding	11739	chr15	-	42140344	42186275		ACTGCACAACCTTGCTTTTGCTTTCCTGGTGGCTGAGCAGGAGCTGGGCATTGCTCAGCT	51332	Hs.709819	GO:0003779|GO:0051015|GO:0008022|GO:0046982|GO:0030507|GO:0030036|GO:0051693|GO:0007411|GO:0045179|GO:0030863|GO:0005737|GO:0005829|GO:0005829|GO:0016020|GO:0008091	NP_057726	Spectrin, beta, non-erythrocytic 5
ASHG19A3A022343	270.378	144.486	7.99654	7.25646	coding	NM_003884	KAT2B	RefSeq_coding	4824	chr3	+	20081523	20195894		ATTTCACGTGGTTGGCAATTCCCTCAACCAGAAACCAAACAAGAAGATCCTGATGTGGCT	8850	Hs.533055	GO:0016407|GO:0016407|GO:0004861|GO:0004402|GO:0042826|GO:0004468|GO:0004468|GO:0005515|GO:0019901|GO:0003713|GO:0003712|GO:0008134|GO:0016740|GO:0018076|GO:0007049|GO:0007050|GO:0032869|GO:0006338|GO:0010467|GO:0043966|GO:0044419|GO:0008152|GO:0008285|GO:0018394|GO:0045944|GO:0006473|GO:0006355|GO:0006360|GO:0006361|GO:0031672|GO:0005671|GO:0031674|GO:0000125|GO:0042641|GO:0016585|GO:0000776|GO:…	NP_003875	K(lysine) acetyltransferase 2B
ASHG19A3A020497	6515.56	4519.89	12.5871	12.2184	coding	NM_031488	L3MBTL2	RefSeq_coding	3205	chr22	+	41601312	41627274		TTGTATGTTCTTTTGGCCTTTTGTTCCTACCTAAATGAAGAAACCATGCCTGGAGGGGCC	83746	Hs.517641	GO:0042393|GO:0046872|GO:0035064|GO:0003714|GO:0008270|GO:0016568|GO:0005634|GO:0005634	NP_113676	L(3)mbt-like 2 (Drosophila)
ASHG19A3A045487	110.729	82.6569	6.71621	6.44333	coding	NM_015531	C2CD3	RefSeq_coding	6300	chr11	-	73745479	73882064		TCAAAAGAGCTGCTTCTGGACCCACAACAAACCCTGGTCTTCAAAGTTTGGCATAAAGGA	26005	Hs.694798		NP_056346	C2 calcium-dependent domain containing 3
ASHG19A3A006611	354.314	360.377	8.37859	8.58818	coding	NM_182617	ACSM2B	RefSeq_coding	2444	chr16	-	20548083	20587695		CCAGAAAGACATCCTGAGAGGACTTGGCAGcctgcagatggcctattgtgggaccttgtg	348158	Hs.567879	GO:0005524|GO:0016405|GO:0047760|GO:0016874|GO:0046872|GO:0000166|GO:0006631|GO:0006629|GO:0006805|GO:0005759|GO:0005739	NP_872423	Acyl-CoA synthetase medium-chain family member 2B
ASHG19A3A044842	522.34	532.465	8.93463	9.15225	coding	NM_033179	OR51B4	RefSeq_coding	933	chr11	-	5322244	5323176		TGTGGTCCCCATTACCATGAGCTATGTCCATTTTCTCTTTCCTCCATTCGTGAATCCTAT	79339	Hs.679499	GO:0004984|GO:0004872|GO:0050896|GO:0007608|GO:0016021|GO:0005886	NP_149419	Olfactory receptor, family 51, subfamily B, member 4
ASHG19A3A054717	148.046	140.839	7.1275	7.21821	coding	NM_001012984	C16orf86	RefSeq_coding	1287	chr16	+	67700716	67702659		AGTGAGCCCTCACCATCTGCCAAACAGCACAAAAAAGCCAAGAAGCGCAAGAGCCTGGGG	388284	Hs.632208		NP_001013002	Chromosome 16 open reading frame 86
ASHG19A3A002033	238.425	241.886	7.81181	8.00059	coding	NM_001127651	NCF2	RefSeq_coding	2256	chr1	-	183524697	183560046		ttcagccttcaggctgtttttggcttgaagCTCTCTTGGCCTCCTAGTTTCTACCTAATC	4688	Hs.587558	GO:0048365|GO:0009055|GO:0008022|GO:0005515|GO:0016175|GO:0007568|GO:0006968|GO:0032870|GO:0045087|GO:0045777|GO:0043525|GO:0045730|GO:0014823|GO:0042493|GO:0009749|GO:0055093|GO:0034616|GO:0033993|GO:0032496|GO:0014070|GO:0032570|GO:0042554|GO:0006801|GO:0043020|GO:0001669|GO:0005737|GO:0005624|GO:0005730	NP_001177723	Neutrophil cytosolic factor 2
ASHG19A3A036672	186.9	138.021	7.46232	7.19196	coding	NM_173518	C8orf45	RefSeq_coding	5114	chr8	+	67782983	67834282		GAATATGTTCAAAACAGGTCTGACTAGTGACTATGAGAATGGAGCTATTTAGAGTTGATT	157777	Hs.437006	GO:0005524|GO:0003677|GO:0006260	NP_775789	Chromosome 8 open reading frame 45
ASHG19A3A047393	4904.97	744.111	12.1838	9.63053	coding	NM_004982	KCNJ8	RefSeq_coding	2381	chr12	-	21917889	21927747		TGGAGAAAAGTGGAATGGAGAAAAGTGGTTTGGAGTCCACTGTGTGTGTGACTAATGTCA	3764	Hs.102308	GO:0005524|GO:0015272|GO:0005242|GO:0005244|GO:0051607|GO:0007507|GO:0006811|GO:0001822|GO:0010107|GO:0006813|GO:0043330|GO:0032496|GO:0009268|GO:0042311|GO:0008282|GO:0016021|GO:0016020|GO:0005624|GO:0005792|GO:0005739|GO:0030016|GO:0042383|GO:0008076	NP_004973	Potassium inwardly-rectifying channel, subfamily J, member 8
ASHG19A3A052270	415.779	423.126	8.60342	8.81807	coding	NM_001127889	SPG21	RefSeq_coding	1635	chr15	-	65255363	65281812		GTGTGCTTGTGACCCTGCCTTTGTGTGGCTGTCACCGGTGGGACTGGCGGGGAGCTGTGT	51324	Hs.242458	GO:0042609|GO:0050851|GO:0008219|GO:0005794|GO:0005737|GO:0005829|GO:0005768|GO:0010008|GO:0016020|GO:0030140	NP_057714	Spastic paraplegia 21 (autosomal recessive, Mast syndrome)
ASHG19A3A036868	85.1464	88.9073	6.33191	6.54491	coding	NM_001172811	SLC30A8	RefSeq_coding	5316	chr8	+	117962511	118188952		ATCAGTTAATGCATACTGAAGGAAGGCTTGTTGGAGAAGAATCCTCTCCTGAACCCTGTG	169026	Hs.532270	GO:0008324|GO:0042803|GO:0008270|GO:0005385|GO:0005385|GO:0006882|GO:0006882|GO:0042593|GO:0030073|GO:0032024|GO:0061088|GO:0060627|GO:0009749|GO:0009749|GO:0032119|GO:0055085|GO:0071577|GO:0071577|GO:0006829|GO:0005794|GO:0016023|GO:0016021|GO:0005886|GO:0030667|GO:0030141|GO:0030658	NP_776250	Solute carrier family 30 (zinc transporter), member 8
ASHG19A3A008316	95.39	73.8731	6.50404	6.28461	coding	NM_031854	KRTAP4-12	RefSeq_coding	1077	chr17	-	39279346	39280419		CTTGAAGTCCAGTGAAGTCTCTCTCTTAAAGTCTTTTGCAAACATTTTTGTACCTTGTTA	83755	Hs.572443	GO:0045095	NP_114060	Keratin associated protein 4-12
ASHG19A3A032491	93.2184	114.74	6.46792	6.92142	coding	NM_145695	DGKB	RefSeq_coding	3360	chr7	-	14215616	14881075		ATTAATTGTGTTTTCCAGAATGAGGTATTATTTAAGGCAGACACTGCCCCTCTCAAAAAA	1607	Hs.567255	GO:0005524|GO:0005509|GO:0004143|GO:0000166|GO:0005515|GO:0016740|GO:0007205|GO:0007596|GO:0035556|GO:0030168|GO:0005737|GO:0005624|GO:0005886	NP_663733	Diacylglycerol kinase, beta 90kDa
ASHG19A3A040358	350.293	224.122	8.36084	7.89018	coding	NM_001081550	THOC2	RefSeq_coding	5625	chrX	-	122734412	122866904		TCCAATTGATCTTGCTGGTCTTCTTCAGTATGTTGCCAATCAGCTAAAGGCGGGCAAAAG	57187	Hs.149991	GO:0003723|GO:0005515|GO:0008380|GO:0046784|GO:0006406|GO:0006397|GO:0006810|GO:0000347|GO:0000445|GO:0005634|GO:0000346	NP_001075019	THO complex 2
ASHG19A3A006757	735.46	1309.08	9.43186	10.4411	coding	NM_198212	CAV2	RefSeq_coding	3144	chr7	+	116139443	116148594		CCCACCGGCTCAACTCGCATCTCAAGGATTTTAATGCCTTTTGTAAAGACCTGCCTAATG	858	Hs.212332	GO:0031748|GO:0051219|GO:0005515|GO:0042803|GO:0019905|GO:0070836|GO:0007029|GO:0007005|GO:0008285|GO:0001937|GO:0060161|GO:0051259|GO:0007088|GO:0048741|GO:0007268|GO:0048278|GO:0006906|GO:0016050|GO:0005794|GO:0000139|GO:0005901|GO:0009986|GO:0005737|GO:0005829|GO:0031234|GO:0005887|GO:0005622|GO:0005811|GO:0005624|GO:0005624|GO:0045121|GO:0005634|GO:0048471|GO:0005886|GO:0043234|GO:0030133	NP_937855	Caveolin 2
ASHG19A3A040744	23821	23747.7	14.4606	14.6002	coding	NM_206923	YY2	RefSeq_coding	2741	chrX	+	21874104	21876845		GATGCTGTTGTTTAGTGTAATTTCTTTGCCTGTTCAGTTAAAGTAGTGCTTGCTTGTAGA	404281	Hs.673601	GO:0003677|GO:0046872|GO:0008270|GO:0005622|GO:0005634|GO:0005886	NP_996806	YY2 transcription factor
ASHG19A3A032828	28796.1	19693.4	14.7543	14.3477	coding	NM_030796	VOPP1	RefSeq_coding	2962	chr7	-	55538306	55640200		GGCTCGTTTCTCTTTTTTGTTCTCTTTTGATAGGATCCTGTTTCCTATGTGTGCAAAATA	81552	Hs.488307		NP_110423	Vesicular, overexpressed in cancer, prosurvival protein 1
ASHG19A3A003072	4176.88	3446.45	11.9474	11.8267	coding	NM_001160393	TRPT1	RefSeq_coding	869	chr11	-	63991271	63993341		ATCGATGGACCCCTGGCTCTGGCAGCAGATGGAATACCCTTCTTCCGCTCTGCCAATGGG	83707	Hs.326586	GO:0000215|GO:0016772|GO:0006388	NP_113660	TRNA phosphotransferase 1
ASHG19A3A003907	188.088	189.298	7.47017	7.64542	coding	NM_001501	GNRH2	RefSeq_coding	423	chr20	+	3024267	3026391		CCCCAGAATGCCCTTAGGCCCCCAGGAAGGGCCCTGGACACTGCAGCAGGCAGCCCAGTC	2797	Hs.129715	GO:0005179|GO:0007275|GO:0007165|GO:0005576|GO:0005576|GO:0005625	NP_847902	Gonadotropin-releasing hormone 2
ASHG19A3A013440	1134.9	701.991	10.063	9.54351	coding	NM_014860	SUPT7L	RefSeq_coding	4261	chr2	-	27873678	27886449		ACTGATGTGGCACATGAGTATTGCCTTAAGTTTACCAAGTTGCTGCGTTTTGCTGTGGAC	9913	Hs.6232	GO:0004402|GO:0003713|GO:0043966|GO:0051457|GO:0030914|GO:0005634|GO:0005634	NP_055675	Suppressor of Ty 7 (S. cerevisiae)-like
ASHG19A3A032191	451.354	322.408	8.7268	8.42268	coding	NM_001002255	SUMO4	RefSeq_coding	702	chr6	+	149721494	149722180		TGAAGTAACTGGTATGTGTACACAAGCATATTGCTTTTTTCTTCAAACCAAACAGCCAAT	387082	Hs.657168		NP_001002255	SMT3 suppressor of mif two 3 homolog 4 (S. cerevisiae)
ASHG19A3A020223	396.862	319.093	8.54193	8.40692	coding	NM_019601	SUSD2	RefSeq_coding	3201	chr22	+	24577443	24585074		GGCTCTAATTCCCCAAACCTGAAACTTCATACCCTGGGATTCTAATACCTATGTCCTGAG	56241	Hs.131819	GO:0030247|GO:0005515|GO:0005044|GO:0006955|GO:0016021|GO:0016020	NP_062547	Sushi domain containing 2
ASHG19A3A005723	580.026	625.449	9.08334	9.37883	coding	NM_080591	PTGS1	RefSeq_coding	4982	chr9	+	125133228	125157981		CCCCCTCATGCCTGACTCCTTCAAGATCGGTGGGGGCAGGAACATGGACCACCACATCCT	5742	Hs.201978	GO:0020037|GO:0008289|GO:0046872|GO:0016491|GO:0016702|GO:0004601|GO:0004666|GO:0007568|GO:0019371|GO:0006633|GO:0042446|GO:0006629|GO:0032811|GO:0010700|GO:0055114|GO:0045987|GO:0045907|GO:0001516|GO:0006692|GO:0008217|GO:0042127|GO:0051412|GO:0010243|GO:0006979|GO:0006805|GO:0005794|GO:0005737|GO:0044444|GO:0005783|GO:0005789|GO:0043231|GO:0005792|GO:0005635|GO:0005634|GO:0005886	NP_542158	Prostaglandin-endoperoxide synthase 1 (prostaglandin G/H synthase and cyclooxygenase)
ASHG19A3A051346	540.375	410.112	8.98354	8.77363	coding	NM_016106	SCFD1	RefSeq_coding	2172	chr14	+	31091520	31205018		CGTATGTTGAATTTCAATGTGCCTCATATTAAAAACAGCACAGGAGAACCAGTATGGAAG	23256	Hs.369168	GO:0051535|GO:0006892|GO:0015031|GO:0060628|GO:0009636|GO:0006890|GO:0006904|GO:0016192|GO:0005794|GO:0032580|GO:0017119|GO:0005798|GO:0005801|GO:0005737|GO:0005783|GO:0005789|GO:0005886	NP_878255	Sec1 family domain containing 1
ASHG19A3A034232	14878.1	11346.5	13.7902	13.5422	coding	NM_005402	RALA	RefSeq_coding	2818	chr7	+	39663161	39747715		GCCACTACCCGATTTGTTTATTTGCAATTTGAGCCATTTAAAGACCAATAAACTTCCTTT	5898	Hs.6906	GO:0031755|GO:0005525|GO:0003924|GO:0000166|GO:0005515|GO:0007265|GO:0031532|GO:0007049|GO:0006935|GO:0000910|GO:0044419|GO:0051665|GO:0048011|GO:0051491|GO:0017157|GO:0007165|GO:0009986|GO:0032154|GO:0005829|GO:0030139|GO:0005622|GO:0030496|GO:0005886	NP_005393	V-ral simian leukemia viral oncogene homolog A (ras related)
ASHG19A3A052728	227.687	225.728	7.7457	7.89999	coding	NM_001144757	SCG5	RefSeq_coding	1244	chr15	+	32933869	32989298		AAGAGGAGGAGCTGACACATTTCACTTGGCTGCGTCTTAATAAACATGAATGCAAGCATT	6447	Hs.156540	GO:0005525|GO:0004857|GO:0005515|GO:0051082|GO:0006886|GO:0007218|GO:0016486|GO:0046883|GO:0006810|GO:0005576|GO:0030141	NP_003011	Secretogranin V (7B2 protein)
ASHG19A3A031367	2216.77	2105.94	11.0208	11.1301	coding	NM_014260	PFDN6	RefSeq_coding	605	chr6	+	33257377	33258711		TCCATGTCGGGGAGGCAGAAACTTGAAGCACAACTAACAGAAAATAATATCGTGAAAGAG	10471	Hs.446374	GO:0051087|GO:0005515|GO:0051082|GO:0051084|GO:0044267|GO:0051131|GO:0006457|GO:0006457|GO:0016272	NP_055075	Prefoldin subunit 6
ASHG19A3A004189	15077	14097.6	13.8094	13.8523	coding	NM_003797	EED	RefSeq_coding	2006	chr11	+	85955814	85989778		AAGTAGAAGATCCTCATAAAGCCAAATGTACAACACTGACTCATCATAAATGTGGTGCTG	8726	Hs.503510	GO:0003682|GO:0042054|GO:0042802|GO:0005515|GO:0016564|GO:0016568|GO:0016571|GO:0006349|GO:0035098|GO:0005694|GO:0005634|GO:0045120|GO:0001739	NP_694536	Embryonic ectoderm development
ASHG19A3A034654	206.074	243.431	7.60253	8.01032	coding	NM_021145	DMTF1	RefSeq_coding	4052	chr7	+	86781869	86825646		GCAGTTGAGCTAATGGTGGAGCCAAAATGCTATTGCCCTGTCTTCATCAACATTTAATCA	9988	Hs.196129	GO:0003677|GO:0003700|GO:0007049|GO:0006355|GO:0006351|GO:0005737|GO:0005730|GO:0005634|GO:0005634	NP_066968	Cyclin D binding myb-like transcription factor 1
ASHG19A3A002521	5361.73	4853.42	12.3096	12.3247	coding	NM_001142428	MORF4L2	RefSeq_coding	1978	chrX	-	102930427	102943086	NM_001142424,	tgtaaagtaccaggacagtgcatggcacatGTTGTATCTCCCACTTCACCCTTCTAGACC	9643	Hs.326387	GO:0005515|GO:0006281|GO:0016568|GO:0001558|GO:0005730|GO:0005634	NP_036418	Mortality factor 4 like 2
ASHG19A3A016727	292.098	360.148	8.10695	8.58732	coding	NM_014905	GLS	RefSeq_coding	4348	chr2	+	191745546	191829776		ATTCCTCAACTGGCCAAATTCAGTCCCGATTTGTGGGGTGTGTCTGTTTGTACAGTAGAT	2744	Hs.116448	GO:0004359|GO:0016787|GO:0007610|GO:0008652|GO:0034641|GO:0014047|GO:0006543|GO:0007269|GO:0002087|GO:0007268|GO:0005759|GO:0005739	NP_055720	Glutaminase
ASHG19A3A005369	252.98	168.477	7.90115	7.48145	coding	NM_024707	GEMIN7	RefSeq_coding	1647	chr19	+	45582529	45594782		GCAACGCCCTGAGTGACGGAAAGAGGTCTGGCGGCTTCTCTGTTGACAACTCAGCTGGTT	79760	Hs.466919	GO:0005515|GO:0016070|GO:0008380|GO:0034660|GO:0000398|GO:0000387|GO:0000387|GO:0015030|GO:0005737|GO:0005829|GO:0005829|GO:0016604|GO:0005654|GO:0005654|GO:0005634|GO:0005681	NP_078983	Gem (nuclear organelle) associated protein 7
ASHG19A3A001641	188.951	141.418	7.47733	7.22425	coding	NM_001093770	SFTPA1	RefSeq_coding	2219	chr10	+	81370694	81375198		AAGCAGCTGGAGGCTCTGTGTGTGGCCTGGAGACCCCACAACCTCCAGCCGGAGGCCTGA	653509	Hs.535295	GO:0005488|GO:0005319|GO:0005529|GO:0034329|GO:0006869|GO:0007585|GO:0005576|GO:0005615|GO:0005578	NP_005402	Surfactant protein A1
ASHG19A3A023552	271.876	293.586	8.00484	8.28516	coding	NM_207015	NAALADL2	RefSeq_coding	4912	chr3	+	174577110	175523426		AGATAGCAGCCAAGACCTGCTCTATTCATATGCAGCCTATTCTGCCAAAGGAACTCTCAA	254827	Hs.660010	GO:0008233|GO:0006508|GO:0016021|GO:0016020	NP_996898	N-acetylated alpha-linked acidic dipeptidase-like 2
ASHG19A3A042886	2119.24	1354.08	10.9585	10.4896	coding	NM_152707	SLC25A16	RefSeq_coding	2560	chr10	-	70242097	70287584		TTTGATGTGACTCGTCGGCGAATGCAATTAGGAACTGTTCTGCCGGAATTTGAAAAGTGC	8034	Hs.180408	GO:0005488|GO:0015291|GO:0015300|GO:0009108|GO:0015939|GO:0055085|GO:0006810|GO:0006766|GO:0006767|GO:0016021|GO:0016020|GO:0005743|GO:0005743|GO:0005739	NP_689920	Solute carrier family 25 (mitochondrial carrier; Graves disease autoantigen), member 16
ASHG19A3A050853	5351.35	4734.33	12.3067	12.2878	coding	NM_020810	TRMT5	RefSeq_coding	5302	chr14	-	61438168	61447782		AGTTCACCTGGTAAGAAATGTGGCCCCAAACAAGGAAATGCTGTGCATCACGTTTCAGAT	57570	Hs.380159	GO:0008168|GO:0009019|GO:0016740|GO:0008033|GO:0005737	NP_065861	TRM5 tRNA methyltransferase 5 homolog (S. cerevisiae)
ASHG19A3A004047	1089.95	556.174	10.0043	9.21596	coding	NM_002576	PAK1	RefSeq_coding	3435	chr11	-	77033060	77185108		AGGTTCAGCTAAAGAGCTGCTACAGCATCAATTCCTGAAGATTGCCAAGCCCCTCTCCAG	5058	Hs.435714	GO:0005524|GO:0005518|GO:0000166|GO:0005515|GO:0005515|GO:0004672|GO:0004674|GO:0004674|GO:0004674|GO:0016740|GO:0006984|GO:0000165|GO:0031295|GO:0050852|GO:0006915|GO:0007411|GO:0007010|GO:0043507|GO:0033138|GO:0046777|GO:0006468|GO:0005794|GO:0030054|GO:0005737|GO:0005829|GO:0005829|GO:0005925|GO:0005886	NP_002567	P21 protein (Cdc42/Rac)-activated kinase 1
ASHG19A3A029555	29710.9	32772.8	14.7992	15.0483	coding	NM_080593	HIST1H2BK	RefSeq_coding	820	chr6	-	27106072	27114619	uc002zdj.1,ENST00000464664,	AATCATGAACTCCTTCGTCAACGACATCTTCGAACGCATCGCGGGTGAGGCTTCCCGCCT	85236	Hs.437275	GO:0003677|GO:0042742|GO:0006334|GO:0005694|GO:0000786|GO:0005634	NP_542160	Histone cluster 1, H2bk
ASHG19A3A045348	214.156	224.552	7.66033	7.89329	coding	NM_005468	NAALADL1	RefSeq_coding	2703	chr11	-	64812296	64826009		TGCTGTGTATCCTAACTCCCTACAACAGCCCCTCAAATAAATCACATCTAGTGACTGGTA	10004	Hs.13967	GO:0004180|GO:0016805|GO:0046872|GO:0008237|GO:0008233|GO:0006508|GO:0016324|GO:0016021|GO:0005886	NP_005459	N-acetylated alpha-linked acidic dipeptidase-like 1
ASHG19A3A012290	8860.29	6625.27	13.0388	12.7729	coding	NM_030818	CCDC130	RefSeq_coding	1679	chr19	+	13858752	13874106		TTTATTTGGTCCTGGTGAGGGTGTTTGTGCCTTGTGAGACTCCGTACATTAAAGACCTGT	81576	Hs.24998	GO:0005515|GO:0009615|GO:0005575	NP_110445	Coiled-coil domain containing 130
ASHG19A3A027468	145.047	174.748	7.0955	7.53258	coding	NM_198282	TMEM173	RefSeq_coding	2191	chr5	-	138855114	138862343		AAACCAGAAGAAAAATATGAGACGGGGAATCATCGTGTGATGTGTGTGCTGCCTTTGGCT	340061	Hs.379754	GO:0005515|GO:0042803|GO:0019901|GO:0019901|GO:0008134|GO:0002218|GO:0006915|GO:0071360|GO:0051607|GO:0045087|GO:0045087|GO:0032608|GO:0032608|GO:0002230|GO:0010552|GO:0032092|GO:0033160|GO:0042993|GO:0005737|GO:0005783|GO:0005789|GO:0016021|GO:0005741|GO:0005739|GO:0048471|GO:0005886	NP_938023	Transmembrane protein 173
ASHG19A3A048124	1335.15	1398.99	10.296	10.5359	coding	NM_177551	GPR109A	RefSeq_coding	2082	chr12	-	123185839	123187904		TTTGCTTTTAACATTAAAAGGGAAATGTGCCTCTGCCCCACAGTTAGAGGGGTGCACGTT	338442	Hs.524812	GO:0070553|GO:0045028|GO:0004872|GO:0006915|GO:0050995|GO:0001781|GO:0070165|GO:0033031|GO:0016021|GO:0005886|GO:0005886|GO:0005886	NP_808219	G protein-coupled receptor 109A
ASHG19A3A032470	3014.32	3933.09	11.47	12.0143	coding	NM_002489	NDUFA4	RefSeq_coding	823	chr7	-	10972814	10979813		TTTGGAAGTCCGTAGTGTCTCATTGCAGATAATTTTTAGCTTAGGGCCTGGTGGCTAGGT	4697	Hs.50098	GO:0008137|GO:0006120|GO:0022904|GO:0006810|GO:0016020|GO:0005743|GO:0005747|GO:0005747|GO:0005739|GO:0070469	NP_002480	NADH dehydrogenase (ubiquinone) 1 alpha subcomplex, 4, 9kDa
ASHG19A3A009532	215.958	258.31	7.67168	8.09656	coding	NM_170607	MLX	RefSeq_coding	2568	chr17	+	40719077	40725220		CCCACGCTCTCCGTGCCCCGGGGCTGCAGAGAAGACAGCTCTCACCCCGCGTGTGCCAAG	6945	Hs.714749	GO:0003677|GO:0046982|GO:0042803|GO:0003700|GO:0008134|GO:0030528|GO:0006112|GO:0045892|GO:0006913|GO:0031325|GO:0006355|GO:0006351|GO:0005737|GO:0005634	NP_937848	MAX-like protein X
ASHG19A3A005934	76583.7	67717.8	16.223	16.0575	coding	NM_139207	NAP1L1	RefSeq_coding	4451	chr12	-	76438671	76478738		TGTGGCCTTGAGGATAACCTGCACTGGTCTACCTTCTGCTTCCCTGGAAAGGATGAATTT	4673	Hs.524599	GO:0005515|GO:0006260|GO:0006334|GO:0008284|GO:0005678|GO:0042470|GO:0005634	NP_631946	Nucleosome assembly protein 1-like 1
ASHG19A3A049438	92.4081	92.4713	6.45638	6.60201	coding	NM_001142296	SPG20	RefSeq_coding	5014	chr13	-	36875776	36920646		GGGATTTGGGGAAGCAACAGGGCTGTGTGGGGTAACCTGCCACCTTTAAGTGGAAATCAG	23111	Hs.440414	GO:0031625|GO:0008219|GO:0005737	NP_055902	Spastic paraplegia 20 (Troyer syndrome)
ASHG19A3A016316	5158.95	4974.83	12.2553	12.3609	coding	NM_032740	SFT2D3	RefSeq_coding	2824	chr2	+	128458596	128461405		GTCCCCTAAATTTCTGTTCTAGTTTTAAATTTCTCTAGAACTTGCAATAGTTGGGGGTTT	84826	Hs.345849	GO:0015031|GO:0016192|GO:0016021|GO:0016020	NP_116129	SFT2 domain containing 3
ASHG19A3A047637	3624.89	4484.64	11.7499	12.2105	coding	NM_001130059	ATF7	RefSeq_coding	6600	chr12	-	53905844	53994805		GACTCATCCCCACCTGATAGCCCTGCCTCTAGTCCCTGTTCCCCACCACTGAAGGAGAAG	11016	Hs.12286	GO:0046872|GO:0005515|GO:0046983|GO:0043565|GO:0003700|GO:0008270|GO:0044419|GO:0006355|GO:0006351|GO:0005737|GO:0005622|GO:0034399|GO:0005654|GO:0005634|GO:0005634	NP_006847	Activating transcription factor 7
ASHG19A3A010326	14688.7	12966.6	13.7736	13.7321	coding	NM_003927	MBD2	RefSeq_coding	2584	chr18	-	51680574	51751158		TTGGCTTAACACATCTCAACCCCTCTGCAAAGCTTTTATTGTCACAGATGAAGACATCAG	8932	Hs.25674	GO:0070742|GO:0003677|GO:0008327|GO:0008327|GO:0005515|GO:0019904|GO:0003696|GO:0016564|GO:0005634|GO:0005634	NP_056647	Methyl-CpG binding domain protein 2
ASHG19A3A054111	46253.7	29143.5	15.4571	14.8858	coding	NM_005009	NME4	RefSeq_coding	1059	chr16	+	447191	450753		AATGACGCCTTTATGCAAGTTGTAAGGAGTTGAACAGTAAAGAGGAAGTTTTGCACACCC	4833	Hs.9235	GO:0005524|GO:0016301|GO:0046872|GO:0004550|GO:0000166|GO:0016740|GO:0006241|GO:0006183|GO:0006228|GO:0015949|GO:0055086|GO:0006165|GO:0009116|GO:0009117|GO:0005743|GO:0005758|GO:0005739	NP_005000	Non-metastatic cells 4, protein expressed in
ASHG19A3A007018	440.224	470.44	8.68931	8.9711	coding	NM_206949	IFI27L1	RefSeq_coding	686	chr14	+	94547638	94569059		ACTTTGTCAGCTCCCGCACAGTAACGTGGAAGTCCAAGAATCCGAGTGGAGGCTCACCGA	122509	Hs.19414	GO:0016021|GO:0016020	NP_996832	Interferon, alpha-inducible protein 27-like 1
ASHG19A3A011025	2974.1	2166.62	11.4488	11.1728	coding	NM_003755	EIF3G	RefSeq_coding	1127	chr19	-	10225690	10230599		CCAAGGAGGTCATCAACGGAAACATAAAGACAGTGACAGAGTACAAGATAGATGAGGATG	8666	Hs.529059	GO:0003723|GO:0000166|GO:0005515|GO:0003743|GO:0003743|GO:0044267|GO:0010467|GO:0006412|GO:0006413|GO:0006413|GO:0005737|GO:0005829|GO:0005829|GO:0005852|GO:0005634|GO:0048471	NP_003746	Eukaryotic translation initiation factor 3, subunit G
ASHG19A3A023583	111.225	106.536	6.72333	6.81323	coding	NM_003940	USP13	RefSeq_coding	7933	chr3	+	179370932	179507187		AAGCGATGTTTTTCGTTTTTTGGTGGAAGAACGCATTCAGTGCTGTCAGACCCGGAAAGT	8975	Hs.175322	GO:0004197|GO:0046872|GO:0008242|GO:0008233|GO:0005515|GO:0004221|GO:0004843|GO:0008270|GO:0006511	NP_003931	Ubiquitin specific peptidase 13 (isopeptidase T-3)
ASHG19A3A036291	289.942	466.92	8.09593	8.96112	coding	NM_001039775	AIM1L	RefSeq_coding	2390	chr1	-	26648349	26670443		GGAGGCTTTTGCTGGGATGAATGTTTTTATAGGGTTTTTGTTGTAACATAAGCTATTTTC	55057	Hs.128738	GO:0005529	NP_001034864	Absent in melanoma 1-like
ASHG19A3A020428	59058.3	38273.1	15.8261	15.2784	coding	NM_005318	H1F0	RefSeq_coding	2336	chr22	+	38201113	38203442		CCCCCTTTTTTAAACAAGTGTTACTTGTGCCGGGAAAATTTTGCTGTCTTTGTAATTTTA	3005	Hs.727646	GO:0003677|GO:0006309|GO:0006915|GO:0006921|GO:0006334|GO:0005794|GO:0015629|GO:0005694|GO:0005654|GO:0000786|GO:0005634	NP_005309	H1 histone family, member 0
ASHG19A3A018346	152.403	159.538	7.1703	7.40275	coding	NM_024034	GDAP1L1	RefSeq_coding	2244	chr20	+	42875907	42909011		AGTTTTTCTACCCTGTGAGGTGGGACTTTCAGTAAAAGCCATGTTGACCCTCTCTCAGAA	78997	Hs.517059		NP_076939	Ganglioside-induced differentiation-associated protein 1-like 1
ASHG19A3A054132	42232.9	46924.3	15.3219	15.5539	coding	NM_005861	STUB1	RefSeq_coding	1646	chr16	+	730114	732767		TTGCCGCCACTATCTGTGTAATAAAATCCGTGAGCACGAGGTGGGACGTGCTGGTGTGTG	10273	Hs.592081	GO:0030544|GO:0051879|GO:0046332|GO:0030911|GO:0019899|GO:0019900|GO:0016874|GO:0051787|GO:0005515|GO:0030674|GO:0042803|GO:0004842|GO:0004842|GO:0004842|GO:0034450|GO:0071218|GO:0006515|GO:0090035|GO:0032436|GO:0031398|GO:0043161|GO:0051865|GO:0051604|GO:0000209|GO:0000209|GO:0016567|GO:0031943|GO:0030579|GO:0006511|GO:0005737|GO:0042405|GO:0031371|GO:0000151	NP_005852	STIP1 homology and U-box containing protein 1, E3 ubiquitin protein ligase
ASHG19A3A036735	17289.7	6006.84	14.0101	12.6349	coding	NM_000067	CA2	RefSeq_coding	1666	chr8	+	86376130	86393721		TGGCAGCGCTAAACCGGGCCTTCAGAAAGTTGTTGATGTGCTGGATTCCATTAAAACAAA	760	Hs.155097	GO:0004089|GO:0016829|GO:0046872|GO:0008270|GO:0015670|GO:0001822|GO:0002009|GO:0042475|GO:0006730|GO:0045780|GO:0032849|GO:0045672|GO:0043627|GO:0010033|GO:0009268|GO:0006950|GO:0010043|GO:0046903|GO:0045177|GO:0030424|GO:0016323|GO:0005737|GO:0005829|GO:0005615|GO:0005902	NP_000058	Carbonic anhydrase II
ASHG19A3A023961	237.326	276.406	7.8054	8.19731	coding	NM_004249	RAB28	RefSeq_coding	1827	chr4	-	13369346	13485989		AGAAGAAAATCAACATACCACCTCTACTCAGAGTAGAATCTGTTCAGTACAGTAGTGCAG	9364	Hs.656060	GO:0019003|GO:0005525|GO:0003924|GO:0000166|GO:0006184|GO:0007264|GO:0005886	NP_004240	RAB28, member RAS oncogene family
ASHG19A3A047694	34814.2	28619.6	15.0388	14.8595	coding	NM_014255	CNPY2	RefSeq_coding	1209	chr12	-	56704216	56710120		TTGAATTCTTTTCCCGAGAGGCTGACAATGTTAAAGACAAACTTTGCAGTAAGCGAACAG	10330	Hs.8752	GO:0005515|GO:0005783|GO:0005887	NP_055070	Canopy 2 homolog (zebrafish)
ASHG19A3A039147	2016.48	1857.46	10.8876	10.9498	coding	NM_153045	C9orf91	RefSeq_coding	4413	chr9	+	117373705	117408696		AAGTCTTAAGGCTCTGTGTTAGTGATAGATGTGGCCATGGTGTAGGCAGTGCAATGTCTT	203197	Hs.522357	GO:0016021|GO:0016020	NP_694590	Chromosome 9 open reading frame 91
ASHG19A3A033536	126.446	129.674	6.90353	7.10262	coding	NM_032842	TMEM209	RefSeq_coding	3560	chr7	-	129804554	129845338		AAGAAGTTTCAGTATCAGCTTGCCTGTAGGTCTCAGGCCCCATGTGCTAACAAAGATGAA	84928	Hs.267245	GO:0016021|GO:0016020	NP_116231	Transmembrane protein 209
ASHG19A3A052519	5052.77	4101.88	12.2266	12.0758	coding	NM_022163	MRPL46	RefSeq_coding	1020	chr15	-	89002708	89010633		AGACAGGAACCTTGTCCTGTTAGTCAGAGAGAAGTTTGGAGACCAGGATGTTTGGATACT	26589	Hs.534261	GO:0016787|GO:0003674|GO:0008150|GO:0005575|GO:0005739|GO:0005840	NP_071446	Mitochondrial ribosomal protein L46
ASHG19A3A030246	4440.63	6374.28	12.0413	12.7152	coding	NM_018064	AKIRIN2	RefSeq_coding	1948	chr6	-	88384578	88411985		CGTTTGTGAAGTTTACGCATGATCAAATAATGCGACGATATGGAGAACAGCCTGCTAGCT	55122	Hs.485915	GO:0016566|GO:0009790|GO:0045087|GO:0008284|GO:0032755|GO:0045944|GO:0032496|GO:0005634|GO:0017053	NP_060534	Akirin 2
ASHG19A3A046141	169.475	140.641	7.31994	7.21646	coding	NM_001025389	AMPD3	RefSeq_coding	4334	chr11	+	10476665	10529126		TGATGCCATTTTAATCAACCCTGCTTGGTTTTAGAGGATTGCTCCTGTGGGTCACTTGAG	272	Hs.501890	GO:0003876|GO:0016787|GO:0046872|GO:0006196|GO:0055086|GO:0009117|GO:0006144|GO:0009168|GO:0043101|GO:0005829	NP_001165902	Adenosine monophosphate deaminase 3
ASHG19A3A053536	4954.62	5526.5	12.1945	12.5178	coding	NM_001019	RPS15A	RefSeq_coding	554	chr16	-	18794276	18801656		AGCACTCTCTGAGAGCTCCAATTTCATCCGTCTGCCATCGGCGCCATCCTGCAATCTAAG	6210	Hs.370504	GO:0003723|GO:0005515|GO:0003735|GO:0003735|GO:0044267|GO:0031018|GO:0010467|GO:0045787|GO:0008284|GO:0009615|GO:0006412|GO:0006412|GO:0006412|GO:0006414|GO:0006415|GO:0019058|GO:0016032|GO:0019083|GO:0005737|GO:0005829|GO:0005829|GO:0022627|GO:0005622|GO:0005739|GO:0005840	NP_001025180	Ribosomal protein S15a
ASHG19A3A005086	236.73	293.213	7.80177	8.28317	coding	NM_018926	PCDHGB6	RefSeq_coding	4599	chr5	+	140787769	140892546		TTTGACTTCACATCCTGAGACTCTGACTTCGCAAGCCCCGCCCAACACGGACTGGCGTTT	5098	Hs.368160	GO:0005509|GO:0016339|GO:0007155|GO:0007156|GO:0016021|GO:0016020|GO:0005886	NP_115779	Protocadherin gamma subfamily C, 3
ASHG19A3A043196	3188.81	2708.59	11.5544	11.4878	coding	NM_078470	COX15	RefSeq_coding	7689	chr10	-	101468506	101492423		GGACATCTACCCAGATAAACAAATTGTTGACTGCTGAATTAATGTGATTTTGGTCTCTAT	1355	Hs.28326	GO:0003824|GO:0004129|GO:0004129|GO:0045333|GO:0006784|GO:0006123|GO:0055114|GO:0006461|GO:0008535|GO:0007585|GO:0016021|GO:0016020|GO:0044429|GO:0005746	NP_510870	COX15 homolog, cytochrome c oxidase assembly protein (yeast)
ASHG19A3A009290	1002.34	949.726	9.8853	9.97427	coding	NM_014238	KSR1	RefSeq_coding	4552	chr17	+	25799035	25950717		TTGAAGTGTCACAACAAATGTACCAAAGAAGCCCCTGCCTGTAGAATATCCTTCCTGCCA	8844	Hs.133534	GO:0005524|GO:0046872|GO:0005515|GO:0004672|GO:0004674|GO:0007265|GO:0035556|GO:0006468|GO:0005737|GO:0005622|GO:0016020	NP_055053	Kinase suppressor of ras 1
ASHG19A3A010843	1399.78	1341.89	10.3636	10.4762	coding	NM_199054	MKNK2	RefSeq_coding	3805	chr19	-	2037469	2051243		ATGTTTCGTAACGGGGGATTCTCTGCCTTTTTGTATCAAAGAACAAGCAAATGGACCCCC	2872	Hs.515032	GO:0005524|GO:0046872|GO:0000166|GO:0004674|GO:0016740|GO:0007166|GO:0007243|GO:0006468|GO:0006417	NP_951009	MAP kinase interacting serine/threonine kinase 2
ASHG19A3A020503	129.342	224.366	6.93563	7.89177	coding	NM_014460	CSDC2	RefSeq_coding	2545	chr22	+	41957013	41972670		ACATAAAATCTGGGAGCCCAGAGCTGCTGAGGTGTGGTCAGCTCCCCTAAAATGGGCACG	27254	Hs.310893	GO:0003677|GO:0003723|GO:0005515|GO:0006398|GO:0006397|GO:0006355|GO:0005737|GO:0005634	NP_055275	Cold shock domain containing C2, RNA binding
ASHG19A3A028970	4872.1	7053.74	12.176	12.8597	coding	NM_017709	FAM46C	RefSeq_coding	5720	chr1	+	118148603	118171010		GGTCACTAACCTTACTTGATGCAGATAAAATCACTTGTCAATGCAAAATGTGTTAGAACT	54855	Hs.356216		NP_060179	Family with sequence similarity 46, member C
ASHG19A3A032271	166.653	147.074	7.29695	7.28327	coding	NM_020823	TMEM181	RefSeq_coding	5397	chr6	+	158957467	159056466		ATGAAGGTCTTCTTCATGGTGGTGGCAGCGGTGTACATTCTGTACCTCTTGTTCTTGATA	57583	Hs.99145	GO:0015643|GO:0009405|GO:0016021|GO:0016020	NP_065874	Transmembrane protein 181
ASHG19A3A010169	1224.75	991.066	10.1729	10.0379	coding	NM_002828	PTPN2	RefSeq_coding	2477	chr18	-	12793247	12884334		TGGGATAGTCAGGTAAACAGTTGGTCAAGACTTTGTAAAGAAATTGGTTTCTGTAAATCC	5771	Hs.654527	GO:0016787|GO:0005515|GO:0004725|GO:0019221|GO:0060333|GO:0006470|GO:0060334|GO:0005737|GO:0005783|GO:0005654	NP_536348	Protein tyrosine phosphatase, non-receptor type 2
ASHG19A3A009833	580.996	284.398	9.0864	8.2382	coding	NM_138363	CCDC45	RefSeq_coding	2705	chr17	+	62503157	62534060		AAACACAAACAGTTCCACTTGGAGAGAAAAAGGCAGCGCAAGCCAAGAGAAACAGATGTC	90799	Hs.569713	GO:0005515	NP_612372	Coiled-coil domain containing 45
ASHG19A3A053000	73.8577	87.1435	6.12696	6.51693	coding	NM_005902	SMAD3	RefSeq_coding	6256	chr15	+	67358194	67487532		CGAGCTGGAGAAGGCCATCACCACGCAGAACGTCAACACCAAGTGCATCACCATCCCCAG	4088	Hs.36915	GO:0070412|GO:0001102|GO:0008013|GO:0070410|GO:0046872|GO:0010843|GO:0005515|GO:0042803|GO:0019901|GO:0043565|GO:0003700|GO:0003700|GO:0008134|GO:0005160|GO:0030618|GO:0031625|GO:0007183|GO:0006919|GO:0007050|GO:0045216|GO:0019049|GO:0006955|GO:0006917|GO:0030308|GO:0045930|GO:0042177|GO:0001933|GO:0000122|GO:0000122|GO:0090263|GO:0035413|GO:0010718|GO:0042993|GO:0045944|GO:0045944|GO:0031053|GO:…	NP_005893	SMAD family member 3
ASHG19A3A031120	87.3558	76.5883	6.36909	6.3404	coding	NM_001145009	BTN3A1	RefSeq_coding	4191	chr6	+	26402464	26415442		GTAAATAACATGATTGCCTTCTACAGCGCTAGAGATTCATTTGTTTATCCCCATTTTTCA	11119	Hs.191510	GO:0006629|GO:0016021|GO:0016020	NP_919423	Butyrophilin, subfamily 3, member A1
ASHG19A3A003265	151.972	98.9754	7.16638	6.70209	coding	NM_001164754	ASPH	RefSeq_coding	3735	chr8	-	62536268	62627199	NM_001164752,	CATAGTTACCACGTGGAAGAGACAGATTCCAGTGAACCAGTAGTAGAAGATGAAAGATTG	444	Hs.332422	GO:0005488|GO:0005509|GO:0009055|GO:0016491|GO:0016702|GO:0004597|GO:0008307|GO:0005198|GO:0006936|GO:0055114|GO:0018193|GO:0005783|GO:0005789|GO:0030176|GO:0016021|GO:0016020	NP_115857	Aspartate beta-hydroxylase
ASHG19A3A022089	88498.6	78487.2	16.4565	16.2607	coding	NM_006004	UQCRH	RefSeq_coding	546	chr1	+	46769379	46782445	NM_001089591,	GGCTGGTAGCTTCTATGTAATTCGCAATGATTCCATCTAAATAAAAGTTCTATGATCTGC	7388	Hs.481571	GO:0032403|GO:0008121|GO:0009060|GO:0006122|GO:0055114|GO:0006119|GO:0051291|GO:0022904|GO:0006810|GO:0016020|GO:0005743|GO:0005746|GO:0005750|GO:0005739	NP_005995	Ubiquinol-cytochrome c reductase hinge protein
ASHG19A3A026505	183.866	119.091	7.44039	6.97784	coding	NM_001089584	C5orf49	RefSeq_coding	1026	chr5	-	7831512	7851264		TTGGTAACTGTTGGGTTGGTTTCTGTTCACTGGCTCTCTACATTTGCCAGGATTCTTTGG	134121	Hs.709979		NP_001083053	Chromosome 5 open reading frame 49
ASHG19A3A003293	204.375	176.881	7.59129	7.55273	coding	NM_001165881	ZNF268	RefSeq_coding	5697	chr12	+	133757994	133783695		AACCCTTCTGGCTGCAGATCTGGAGCATCCCTCGCGTCCTGTCACTTCCAGCGAGGCACA	10795	Hs.124047	GO:0003677|GO:0046872|GO:0003700|GO:0008270|GO:0006355|GO:0006351|GO:0005622|GO:0005634	NP_694422	Zinc finger protein 268
ASHG19A3A005241	1148.33	565.7	10.081	9.23631	coding	NM_021971	GMPPB	RefSeq_coding	1583	chr3	-	49758931	49761384		CTGGCGCTGCCGCGTGGGTCAGTGGGTACGCATGGAGAACGTGACAGTGCTGGGTGAGGA	29925	Hs.567488	GO:0005525|GO:0004475|GO:0000166|GO:0016779|GO:0016740|GO:0009298|GO:0009058|GO:0044267|GO:0006488|GO:0043687|GO:0018279	NP_068806	GDP-mannose pyrophosphorylase B
ASHG19A3A010904	3870.22	3703.92	11.8425	11.9343	coding	NM_019107	C19orf10	RefSeq_coding	1067	chr19	-	4657565	4670415		TTGAAAGGGAAAGTGATGTCCCTCTGAAAACTGAGGAATTTGAAGTGACCAAAACAGCAG	56005	Hs.465645	GO:0005793|GO:0005576	NP_061980	Chromosome 19 open reading frame 10
ASHG19A3A042876	118.471	116.266	6.81057	6.9407	coding	NM_001171941	FNDC5	RefSeq_coding	3035	chr1	-	33327869	33338082		TGATTTTGGATCCTCTCCTTTTGCAGGGTGCCAGGGGCCAGTGGTGATTTGAAGAAAAAA	252995	Hs.524234	GO:0016021|GO:0016020|GO:0005778|GO:0005777	NP_715637	Fibronectin type III domain containing 5
ASHG19A3A022864	261.618	300.109	7.94808	8.31955	coding	NM_018293	ZNF654	RefSeq_coding	4957	chr3	+	88188261	88193812		AGATTAAGATGTGGCAAATGCCTGACCACCTACTGTAATGCAGAAGCACTTGAGGCTCAT	55279	Hs.591650	GO:0003677|GO:0046872|GO:0008270|GO:0005622|GO:0005634	NP_060763	Zinc finger protein 654
ASHG19A3A050867	175.495	236.657	7.36999	7.96777	coding	NM_080666	WDR89	RefSeq_coding	3125	chr14	-	64063757	64108591		TGACCGCTCTAAGCCGCCGCGCAGCCTGCGTTTTCTCCGGTACAGGTTGAGGCTACTAAG	112840	Hs.655666		NP_542397	WD repeat domain 89
ASHG19A3A008145	75.5587	64.8707	6.16016	6.10061	coding	NM_015986	CRLF3	RefSeq_coding	2954	chr17	-	29109702	29151778		AAATCGCCATGCTTGGTGGTGTGGGAGAAGAGAATGAGAAACTGTGGAGCTTTACCAAAA	51379	Hs.370168	GO:0016563|GO:0045749|GO:0030308|GO:0046427|GO:0071158|GO:0010552|GO:0005737	NP_057070	Cytokine receptor-like factor 3
ASHG19A3A028152	2447.18	2841.94	11.1654	11.5567	coding	NM_012176	FBXO4	RefSeq_coding	1523	chr5	+	41925355	41941663		ATGCCCTGTTTTTATTTGGCTCATGAGCTGCATCTGAATCTTCTAAATCACCCATGGCTG	26272	Hs.165575	GO:0005515|GO:0042803|GO:0004842|GO:0031146|GO:0031398|GO:0000209|GO:0016567|GO:0000723|GO:0006511|GO:0019005|GO:0005737|GO:0000151	NP_277019	F-box protein 4
ASHG19A3A000535	168.637	158.256	7.31229	7.39042	coding	NM_000064	C3	RefSeq_coding	5101	chr19	-	6677846	6720662		ACACACACCCCAGCCAGAAGCCCTTGAGCATCACGGTGCGCACGAAGAAGCAGGAGCTCT	718	Hs.529053	GO:0004866|GO:0005515|GO:0005102|GO:0007186|GO:0006956|GO:0006957|GO:0006958|GO:0006955|GO:0006954|GO:0045087|GO:0001970|GO:0045766|GO:0050766|GO:0001798|GO:0010575|GO:0050776|GO:0007165|GO:0005576|GO:0005576|GO:0005615	NP_000055	Complement component 3
ASHG19A3A011618	2553.92	3179.22	11.2289	11.7082	coding	NM_001079882	PRKD2	RefSeq_coding	2939	chr19	-	47177573	47217577		CGCCCGCTGCTGAAGGCGGCTCTGAGCTTTTCCGTCGCCACATCCCTCTCCCGCCCCTCA	25865	Hs.466987	GO:0005524|GO:0046872|GO:0000166|GO:0004697|GO:0004672|GO:0004674|GO:0050852|GO:0008219|GO:0035556|GO:0010552|GO:0046777|GO:0006468|GO:0005737|GO:0005622|GO:0016020|GO:0005634	NP_057541	Protein kinase D2
ASHG19A3A042324	1195.39	1186.37	10.1396	10.2994	coding	NM_001001918	OR14C36	RefSeq_coding	939	chr1	+	248512076	248513013		CTCCCCTCTTTAACCCTATTATTTACAGTCTTAGAAATAAGCAAATAAAGGTGGCCATCA	127066	Hs.553583	GO:0004984|GO:0004872|GO:0050896|GO:0007608|GO:0016021|GO:0005886	NP_001001918	Olfactory receptor, family 14, subfamily C, member 36
ASHG19A3A030060	508.895	516.68	8.89345	9.10879	coding	NM_019036	HMGCLL1	RefSeq_coding	2571	chr6	-	55299172	55444012		AAACCTTCACTGCTTTCAGCCCGATGTCTCTGGCTTCTCAGTCTCCTTGGCAGGCACGGT	54511	Hs.147054	GO:0004419|GO:0016829|GO:0046872	NP_061909	3-hydroxymethyl-3-methylglutaryl-CoA lyase-like 1
ASHG19A3A003236	100.138	68.4631	6.57601	6.17724	coding	NM_001164548	DISC1	RefSeq_coding	2603	chr1	+	231762560	231954990	NM_001164556,	CAGAGCCACCGGAAACCATAAGGAGGAAACCATTTCTGGACGGCTAAAGACCTCACCGAG	27185	Hs.13318	GO:0005515|GO:0000226|GO:0007275|GO:0007399|GO:0001764|GO:0030177|GO:0002052|GO:0005813|GO:0005737|GO:0005856|GO:0005874	NP_061132	Disrupted in schizophrenia 1
ASHG19A3A044562	10706.8	9571.84	13.3123	13.2964	coding	NM_207009	FAM45A	RefSeq_coding	2192	chr10	+	120863610	120897215		AAGGATTATTTTTCACTCAGTACTGATGTCCTTGGAAATCTTACCTGGAAACATGTTTGC	404636	Hs.434241		NP_996892	Family with sequence similarity 45, member A
ASHG19A3A011693	241.847	232.612	7.83283	7.94565	coding	NM_006270	RRAS	RefSeq_coding	1013	chr19	-	50138551	50143400		TACGACCCCACTATTGAGGACTCCTACACGAAGATCTGCAGTGTGGATGGCATCCCAGCC	6237	Hs.515536	GO:0019003|GO:0005525|GO:0003924|GO:0000166|GO:0005515|GO:0006184|GO:0006184|GO:0007265|GO:0007411|GO:0030336|GO:0007165|GO:0007268|GO:0005622|GO:0005886	NP_006261	Related RAS viral (r-ras) oncogene homolog
ASHG19A3A006599	1156.31	1083.63	10.0915	10.1653	coding	NM_181890	UBE2D3	RefSeq_coding	2187	chr4	-	103717133	103790032		TTCTAACCGAAAGTGCCTTTCAAAAGCGCCTGTGTCTGGCAGAGCTGGTGTGAGACGAGA	7323	Hs.518773	GO:0005524|GO:0016881|GO:0016874|GO:0000166|GO:0005515|GO:0004842|GO:0030509|GO:0006281|GO:0006915|GO:0032480|GO:0043687|GO:0043161|GO:0070979|GO:0070936|GO:0006464|GO:0006513|GO:0000209|GO:0016567|GO:0016567|GO:0007179|GO:0006511|GO:0005768|GO:0010008|GO:0005886	NP_871622	Ubiquitin-conjugating enzyme E2D 3 (UBC4/5 homolog, yeast)
ASHG19A3A041366	51.7919	67.3901	5.61057	6.15354	coding	NM_001171095	CLDN2	RefSeq_coding	2932	chrX	+	106161589	106174091		TGGAGAGACCCTTGCTCAGGAGCACTGCCAGGGGATCAGTGCCCCATTTGTACCTGCAAG	9075	Hs.522746	GO:0042802|GO:0005198|GO:0016338|GO:0030054|GO:0016021|GO:0005886|GO:0005923	NP_065117	Claudin 2
ASHG19A3A047542	1273.45	526.469	10.2275	9.13656	coding	NM_004818	DDX23	RefSeq_coding	3288	chr12	-	49223539	49245957		AATCTTGGAGCAAGGCTTTGACCCACCCATCATTATTTTTGTCAACCAGAAGAAGGGCTG	9416	Hs.130098	GO:0005524|GO:0004004|GO:0008026|GO:0004386|GO:0016787|GO:0003676|GO:0000166|GO:0005515|GO:0008380|GO:0000375|GO:0000354|GO:0010467|GO:0000398|GO:0000398|GO:0005682|GO:0071013|GO:0005654|GO:0005634	NP_004809	DEAD (Asp-Glu-Ala-Asp) box polypeptide 23
ASHG19A3A038255	15296.9	12831	13.8262	13.7164	coding	NM_178448	C9orf140	RefSeq_coding	3865	chr9	-	139956580	139965028		AACACACCCACACCAGGCCTCAGGATTTTGTGTTGATCAAGTTCCAAGGAAAAGGAACAT	89958	Hs.19322	GO:0005737|GO:0005634	NP_848543	Chromosome 9 open reading frame 140
ASHG19A3A036475	6402.02	9663.31	12.5594	13.3123	coding	NM_016240	SCARA3	RefSeq_coding	3631	chr8	+	27491576	27530537		CATATGATAATACCATTCTGCATAGTATTACTGACTCAGTAAAGAGCTATTTCCAGGAGT	51435	Hs.128856	GO:0005044|GO:0009650|GO:0006979|GO:0005794|GO:0000139|GO:0005783|GO:0005789|GO:0016021|GO:0016020	NP_878185	Scavenger receptor class A, member 3
ASHG19A3A021082	119.847	64.9471	6.82624	6.10183	coding	NM_005879	TRAIP	RefSeq_coding	2042	chr3	-	49866027	49893992		TACTCTGAATTGGATCAGGCCAAGTTAGAACTGAAGTCAGCCCAGAAGGACTTACAGAGT	10293	Hs.517972	GO:0046872|GO:0005515|GO:0005057|GO:0008270|GO:0008283|GO:0006917|GO:0007165|GO:0005737|GO:0048471	NP_005870	TRAF interacting protein
ASHG19A3A053751	1306.81	1050.27	10.2625	10.1178	coding	NM_001127892	SALL1	RefSeq_coding	5253	chr16	-	51169885	51184508		GTGTCGGGGTCTGGCTCGCAAAATTTATCTCCGCATCTCTTCCCACAACACTTGCACCCT	6299	Hs.135787	GO:0003677|GO:0008013|GO:0004407|GO:0046872|GO:0005515|GO:0003700|GO:0016563|GO:0016564|GO:0008270|GO:0030325|GO:0001658|GO:0048566|GO:0042733|GO:0008406|GO:0007507|GO:0031129|GO:0001822|GO:0072073|GO:0060173|GO:0003337|GO:0000122|GO:0021889|GO:0061034|GO:0021553|GO:0042473|GO:0021983|GO:0030177|GO:0045944|GO:0006351|GO:0001657|GO:0072092|GO:0003281|GO:0016581|GO:0010369|GO:0005737|GO:0000792|GO:…	NP_002959	Sal-like 1 (Drosophila)
ASHG19A3A002938	210.813	301.07	7.63793	8.32405	coding	NM_001146207	RASGRP4	RefSeq_coding	2944	chr19	-	38899697	38916945		TACCTGGAGTTCCGGTCCTTCCAGGCTATCACGGCCCTCCTGGAGCTCACTGAGCTCCTT	115727	Hs.130434	GO:0030742|GO:0005088|GO:0019992|GO:0046872|GO:0007202|GO:0016049|GO:0008283|GO:0030099|GO:0046579|GO:0008277|GO:0051056|GO:0009991|GO:0007169|GO:0005737|GO:0005622|GO:0005624|GO:0005886|GO:0005625	NP_733749	RAS guanyl releasing protein 4
ASHG19A3A005180	217.802	163.819	7.68508	7.43826	coding	NM_020909	EPB41L5	RefSeq_coding	6567	chr2	+	120770668	120936694		TATCACACCTGCCGACAGTGGTTCTGTTCTAAAGGAAGCTACAGATGAATTGGATGCCTT	57669	Hs.369232	GO:0005488|GO:0008092|GO:0019904|GO:0048318|GO:0071560|GO:0007398|GO:0048617|GO:0007492|GO:0003382|GO:0001701|GO:0007509|GO:0022408|GO:0032091|GO:0001839|GO:0048339|GO:0010634|GO:0010718|GO:0051894|GO:0032092|GO:0010608|GO:0070201|GO:0032525|GO:0006931|GO:0005912|GO:0030054|GO:0031252|GO:0005737|GO:0005856|GO:0019898|GO:0005925|GO:0005886|GO:0032587	NP_065960	Erythrocyte membrane protein band 4.1 like 5
ASHG19A3A047194	234.674	101.258	7.78935	6.73595	coding	NM_152640	DCP1B	RefSeq_coding	2105	chr12	-	2055213	2113677		TCTCGTGGTGTACAAAATGCTTCCAGAACTCAGAACCTGTTCGAGAAACTTCAGAGTACC	196513	Hs.130934	GO:0016787|GO:0005515|GO:0016070|GO:0043928|GO:0016071|GO:0000288|GO:0000184|GO:0005737|GO:0005829|GO:0005634	NP_689853	DCP1 decapping enzyme homolog B (S. cerevisiae)
ASHG19A3A044364	190.162	134.021	7.48689	7.14727	coding	NM_031484	MARVELD1	RefSeq_coding	3250	chr10	+	99473464	99477909		AAGCCAAAGTTATTCAGATGGTTTTCCCAGGCTAAAGGAAAGTCACCTGCAAGAGATCCC	83742	Hs.209614	GO:0016021|GO:0016020|GO:0005634	NP_113672	MARVEL domain containing 1
ASHG19A3A045264	1913.42	1679.52	10.8153	10.7982	coding	NM_024060	AHNAK	RefSeq_coding	1108	chr11	-	62201015	62314332		ACTATGGTGCTCAGGTGATTATCCTTCGCTCGTTTATCCAATAAACATTTATCAAGCATC	79026	Hs.502756	GO:0005515|GO:0007399|GO:0005634	NP_076965	AHNAK nucleoprotein
ASHG19A3A005963	455.332	404.124	8.73811	8.75206	coding	NM_144583	ATP6V1C2	RefSeq_coding	3112	chr2	+	10861774	10925228		GCTGTCTGATAAGAAGCAACAGTATGGCCCCCTGCTGCGCTGGCTCAAGGTGAACTTCAG	245973	Hs.580464	GO:0008553|GO:0016820|GO:0015991|GO:0006879|GO:0008286|GO:0006811|GO:0015992|GO:0033572|GO:0055085|GO:0005829|GO:0005829|GO:0033180	NP_653184	ATPase, H+ transporting, lysosomal 42kDa, V1 subunit C2
ASHG19A3A042823	1833.12	1024.92	10.7533	10.0855	coding	NM_007057	ZWINT	RefSeq_coding	1687	chr10	-	58117198	58121034	NM_032997,	TGTTTCAGAAACTTGGAAACCTGAAGCAGCAGGCAGAACAGGAGCGGGACAAGCTGCAGA	11130	Hs.591363	GO:0047485|GO:0005515|GO:0000087|GO:0007049|GO:0051301|GO:0051649|GO:0000278|GO:0007093|GO:0000236|GO:0000070|GO:0048015|GO:0007051|GO:0000777|GO:0005737|GO:0005829|GO:0000776|GO:0005634	NP_127490	ZW10 interactor
ASHG19A3A049006	14093.2	10596.7	13.7103	13.4463	coding	NM_152261	C12orf23	RefSeq_coding	3386	chr12	+	107349543	107367811		GATGGGAAAAGAACACATGAATTTGTTAATAAAGCACTATGATCTGCAAACGATGGAATG	90488	Hs.257664	GO:0016021|GO:0016020	NP_689474	Chromosome 12 open reading frame 23
ASHG19A3A003120	722.361	544.454	9.40628	9.18502	coding	NM_001161659	MYB	RefSeq_coding	3204	chr6	+	135502452	135540311		CTTACTGAAGAAAATCAAACAAGAGAATATTCTTACAAGCTCCGTTTTAATGGCACCAGC	4602	Hs.606320	GO:0003677|GO:0005515|GO:0016566|GO:0016563|GO:0016563|GO:0007596|GO:0010553|GO:0010552|GO:0006355|GO:0016363|GO:0005634	NP_005366	V-myb myeloblastosis viral oncogene homolog (avian)
ASHG19A3A054487	4541.8	2799.61	12.0748	11.5343	coding	NM_024031	PRR14	RefSeq_coding	2154	chr16	+	30662240	30667733		GGAGTTCAGCTTGGAAGAAATTTACACCAACAAGAATTACCAATCACCCACAACCAGGAG	78994	Hs.293629		NP_076936	Proline rich 14
ASHG19A3A034545	8590.25	6393.54	12.9961	12.7199	coding	NM_002314	LIMK1	RefSeq_coding	3332	chr7	+	73498155	73536854		AACCGTGACGTCCAAGGAACCAAACCCAGACGCAGAACAATAAAATAAATTCCGTACTCC	3984	Hs.647035	GO:0005524|GO:0031072|GO:0046872|GO:0000166|GO:0005515|GO:0046982|GO:0004672|GO:0004674|GO:0016740|GO:0008270|GO:0007266|GO:0030036|GO:0007411|GO:0051444|GO:0007399|GO:0032233|GO:0045773|GO:0006468|GO:0007165|GO:0005737|GO:0005829|GO:0005925|GO:0030426|GO:0043005|GO:0005730|GO:0005634	NP_002305	LIM domain kinase 1
ASHG19A3A018359	125.996	187.887	6.89801	7.6357	coding	NM_006282	STK4	RefSeq_coding	6344	chr20	+	43595119	43708591		AATACTATGATTGAGCACGATGACACGTTGCCATCACAACTGGGCACCATGGTGATCAAT	6789	Hs.472838	GO:0005524|GO:0042802|GO:0000287|GO:0000166|GO:0005515|GO:0046983|GO:0042803|GO:0043539|GO:0004674|GO:0008134|GO:0016740|GO:0000902|GO:0035329|GO:0007243|GO:0090090|GO:0018105|GO:0043065|GO:0071902|GO:0046777|GO:0006468|GO:0007165|GO:0005737|GO:0005634	NP_006273	Serine/threonine kinase 4
[truncated: 14,612 more rows]
