# Supplementary material for: The Role of PinX1 in Growth Control of Breast Cancer Cells and Its Potential Molecular Mechanism by mRNA and lncRNA Expression Profiles Screening
Source: Biomed Res Int. 2014 Feb 3;2014:978984. doi: 10.1155/2014/978984 (PMC3929369; doi:10.1155/2014/978984)
Supplement: Supplementary file 1 — Human LncRNA Array V2.0 was applied for screening the alterations of lncRNA and mRNA expression profile between PinX1 overexpressed and control MCF-7 cells. After the quantile normalization and data filtering steps, the mRNA expression profile data qualified for fold-change comparison was listed in Tables S1, and lncRNA expression profile data was listed in Table S2. The differentially expressed mRNAs was listed in Tables S3 and differentially expressed lncRNAs was listed in Tables S4. GO analysis of the differentially expressed mRNAs by biological processes, cellular components and molecular functions was showed in Table S5. Profiling data of enhancer-like lncRNAs was listed in Table S6. The enhancer-like lncRNAs and their adjacent coding gene pairs was listed in Table S7. Profiling data of the Rinn lincRNAs was listed in Table S8. The Rinn lincRNAs and their adjacent coding gene pairs was listed in Table S9. Profiling data of the Hox clusters was listed in Table S10. [file 978984.f1.zip › 978984.f1/Table S2.xls]

## Sheet: All Targets Value - LncRNAs
All Targets Value (Entities where at least 2 out of 2 samples have flags in [Present, Marginal]) # Column A: ProbeName, it represents the probe name. # Column B ~ C: Raw Intensity of each sample. # Column D ~ E: Log2 value of Normalized Intensity of each sample. # Column F ~ W: Annotations to each probe, including type, seqname, GeneSymbol, source, RNAlength, chrom, strand, txStart, txEnd, Xhyb, …
	Raw Intensities		Normalized Intensities		Annotations
ProbeName	[Empty Vector]](raw)	[pcDNA3.1-PinX1](raw)	[Empty Vector]](normalized)	[pcDNA3.1-PinX1]](normalized)	type	seqname	GeneSymbol	source	RNAlength	chrom	strand	txStart	txEnd	Xhyb	probeSeq	relationship	Associated_gene_acc	Associated_gene_name	Associated_protein_name	Associated_gene_strand	Associated_gene_start	Associated_gene_end
ASHG19A3A032313	264.086	100.88	7.96243	6.7296	noncoding	ENST00000435810	RP11-252P19.1	Ensembl	1122	chr6	+	166167676	166189268		GAAACATCTTCCCAGAAAACAGACTACAACAAATCATTTCCCTGGTATGAAGGAATGAAG	intergenic
ASHG19A3A014810	21718.1	25792.2	14.3285	14.713	noncoding	ENST00000399556	AC010746.4	Ensembl	865	chr2	-	198244424	198245616	NM_199185,NM_002520,NM_001037738,ENST00000434232,ENST00000428039,ENST00000393516,	GGACAAGAATCCTTCAAAAAACAGGAAAAAACTCCTAAAACACCTAAAAGGACCTAGTTC	intergenic
ASHG19A3A050157	137.176	132.275	7.01686	7.12995	noncoding	ENST00000455126	RP11-83N23.2	Ensembl	294	chr13	+	47426277	47430434		CAAGTACATCTTCCTTGCTGACAATATGCTCTCCTATCTTTTGTAAGAGTACACAATTTA	intronic antisense	NM_001165947	HTR2A	5-hydroxytryptamine receptor 2A isoform 2	-	47407512	47471169
ASHG19A3A050157	137.176	132.275	7.01686	7.12995	noncoding	ENST00000455126	RP11-83N23.2	Ensembl	294	chr13	+	47426277	47430434		CAAGTACATCTTCCTTGCTGACAATATGCTCTCCTATCTTTTGTAAGAGTACACAATTTA	intronic antisense	NM_000621	HTR2A	5-hydroxytryptamine receptor 2A isoform 1	-	47407512	47471169
ASHG19A3A019949	287.135	234.641	8.08083	7.95669	noncoding	ENST00000413815	RP11-191L9.5	Ensembl	809	chr22	-	48058238	48059352		AGGTGTCAGAAGTGTGAGCCTGAAGGCCTAAGAGGTGTTGCAGCTTCTTTACCATTTTTT	intergenic
ASHG19A3A026653	10404	11465.9	13.2757	13.5577	noncoding	ENST00000440440	BRI3P1	Ensembl	378	chr1	+	100678848	100679226	NM_015379,	ATTTGCTGTTTTGCCTTGAGGGAGCGAAGATGCCCCAACTGTGGAGCCACCTTCGCTTAA	intronic antisense	NM_001918	DBT	lipoamide acyltransferase component of	-	100652477	100715409
ASHG19A3A037731	247.776	204.935	7.86809	7.76462	noncoding	ENST00000426188	AL691447.1	Ensembl	330	chr9	-	97109515	97109845	NR_028350,	CTGAAATCATTGCCAAGGACTTAAAGGAGAAGAAGGAAGTTGTGAAAGACGCGGAAAATG	intergenic
ASHG19A3A016972	121.243	68.4385	6.84209	6.17665	noncoding	AK093901		misc_RNA	2046	chr2	+	219120041	219122087		TGACTCTTCTCTTAACAAGGACACACTTGGCGTTAGTATGGATCTAGCCTCAAAGACCCT	intergenic
ASHG19A3A039413	306.071	282.168	8.1714	8.22739	noncoding	ENST00000412680	RP11-263F14.3	Ensembl	457	chr9	+	137759864	137760321		TCATGGAGAATGCCCTATTTTTCCCTCTGAGCAGGTGATTCTGACACACCACAACAACTA	intergenic
ASHG19A3A054727	464.451	440.154	8.76478	8.87884	noncoding	AK124821		misc_RNA	1764	chr16	+	67981589	67983353		CACGCAGATTTGCCTGGCTGATTCCAGAATGTTAAAAGCAAATGACTTTGAAAATGGATG	natural antisense	NM_001145961	SLC12A4	solute carrier family 12 member 4 isoform b	-	67977376	68002597
ASHG19A3A054727	464.451	440.154	8.76478	8.87884	noncoding	AK124821		misc_RNA	1764	chr16	+	67981589	67983353		CACGCAGATTTGCCTGGCTGATTCCAGAATGTTAAAAGCAAATGACTTTGAAAATGGATG	natural antisense	NM_001145963	SLC12A4	solute carrier family 12 member 4 isoform d	-	67977376	67997968
ASHG19A3A054727	464.451	440.154	8.76478	8.87884	noncoding	AK124821		misc_RNA	1764	chr16	+	67981589	67983353		CACGCAGATTTGCCTGGCTGATTCCAGAATGTTAAAAGCAAATGACTTTGAAAATGGATG	natural antisense	NM_001145964	SLC12A4	solute carrier family 12 member 4 isoform e	-	67977376	68000781
ASHG19A3A054727	464.451	440.154	8.76478	8.87884	noncoding	AK124821		misc_RNA	1764	chr16	+	67981589	67983353		CACGCAGATTTGCCTGGCTGATTCCAGAATGTTAAAAGCAAATGACTTTGAAAATGGATG	natural antisense	NM_001145962	SLC12A4	solute carrier family 12 member 4 isoform c	-	67977376	68002597
ASHG19A3A054727	464.451	440.154	8.76478	8.87884	noncoding	AK124821		misc_RNA	1764	chr16	+	67981589	67983353		CACGCAGATTTGCCTGGCTGATTCCAGAATGTTAAAAGCAAATGACTTTGAAAATGGATG	natural antisense	NM_005072	SLC12A4	solute carrier family 12 member 4 isoform a	-	67977376	68002597
ASHG19A3A000094	2003.8	2817.15	10.877	11.5434	noncoding	ENST00000412736	MEG3	Ensembl	1670	chr14	+	101292454	101327308		TGACTTGAGTAAGAACACGAATTATGCATTACCACTCCCCTGCCCCAGGAGCCACTCCCA	intergenic
ASHG19A3A046989	12066.3	8382.2	13.4857	13.1044	noncoding	uc001pqf.2	PAFAH1B2	UCSC_knowngene	2506	chr11	+	117039253	117041759	NM_002572,	CATTGGAAGTTTGTGATTTTGCTTTGGCAAAGTTTCATTGACTAGTAGAACTCATTCTGT	intron sense-overlapping	NM_001184746	PAFAH1B2	platelet-activating factor acetylhydrolase IB	+	117014999	117047131
ASHG19A3A046989	12066.3	8382.2	13.4857	13.1044	noncoding	uc001pqf.2	PAFAH1B2	UCSC_knowngene	2506	chr11	+	117039253	117041759	NM_002572,	CATTGGAAGTTTGTGATTTTGCTTTGGCAAAGTTTCATTGACTAGTAGAACTCATTCTGT	intron sense-overlapping	NM_001184748	PAFAH1B2	platelet-activating factor acetylhydrolase IB	+	117014999	117047592
ASHG19A3A046989	12066.3	8382.2	13.4857	13.1044	noncoding	uc001pqf.2	PAFAH1B2	UCSC_knowngene	2506	chr11	+	117039253	117041759	NM_002572,	CATTGGAAGTTTGTGATTTTGCTTTGGCAAAGTTTCATTGACTAGTAGAACTCATTCTGT	exon sense-overlapping	NM_002572	PAFAH1B2	platelet-activating factor acetylhydrolase IB	+	117014999	117041761
ASHG19A3A046989	12066.3	8382.2	13.4857	13.1044	noncoding	uc001pqf.2	PAFAH1B2	UCSC_knowngene	2506	chr11	+	117039253	117041759	NM_002572,	CATTGGAAGTTTGTGATTTTGCTTTGGCAAAGTTTCATTGACTAGTAGAACTCATTCTGT	intron sense-overlapping	NM_001184747	PAFAH1B2	platelet-activating factor acetylhydrolase IB	+	117014999	117047131
ASHG19A3A031964	130.436	151.525	6.9469	7.32783	noncoding	ENST00000415883	RP11-346D19.1	Ensembl	597	chr6	+	113852319	113864995		CCCTGCTGTCTTTATATGTACAACTTGCATTTTGCAAGAGTTTAGAAAGTTGTAACCTTA	intergenic
ASHG19A3L0000965	76.9819	97.0161	6.18645	6.67159	noncoding	BQ027881	lincRNA-LIPG-1	lincRNA	485	chr18	-	47143727	47144197		AAAGAGAGAACAGAGTTTTATCAGGATCTCTGCTCTACCCACCAAGACTCAAAACCAGGC	intergenic
ASHG19A3A032810	2327.22	2308.85	11.0938	11.2625	noncoding	ENST00000434161	CTD-2021A8.3	Ensembl	423	chr7	-	51456093	51457401	ENST00000444843,ENST00000426314,	TTGACTTTTGGTGGCCTCTTCAGGCCCAGAACTTGACCTCCAGTCGGCCTTGGCAGGCCC	intergenic
ASHG19A3A041048	2937.71	2172.3	11.4282	11.177	noncoding	ENST00000451120	RP3-390O13.1	Ensembl	739	chrX	+	54249756	54250495		ATAGAGCTAGCTGTCTTCCTGCCTGCCCTGCATCATAAAATACAAAGGGAAGAGAAGACT	intronic antisense	NM_020922	WNK3	serine/threonine-protein kinase WNK3 isoform 1	-	54219255	54384438
ASHG19A3A041048	2937.71	2172.3	11.4282	11.177	noncoding	ENST00000451120	RP3-390O13.1	Ensembl	739	chrX	+	54249756	54250495		ATAGAGCTAGCTGTCTTCCTGCCTGCCCTGCATCATAAAATACAAAGGGAAGAGAAGACT	intronic antisense	NM_001002838	WNK3	serine/threonine-protein kinase WNK3 isoform 2	-	54219255	54384438
ASHG19A3A044751	211.303	152.864	7.64134	7.33989	noncoding	ENST00000449749	AC068580.7	Ensembl	338	chr11	-	1798159	1799618		AAATGGCAGCGTTGTGGGTAAAATAACACCTCCTTCAGAGACATTGACATCCTCATCCCT	intergenic
ASHG19A3A046287	72767.8	75091.1	16.137	16.2008	noncoding	ENST00000486306	RP11-313M3.1	Ensembl	515	chr11	+	39183002	39183517		TAAGGGATGATGTGCGGGTTCAGGAGGTGCCCAAACTGAAGGTTTGTGCGCTGCGCATGA	intergenic
ASHG19A3A055112	239.031	265.592	7.81541	8.13861	noncoding	uc001yed.1	CR611440	UCSC_knowngene	785	chr14	+	95625022	95646270		TAACAGACGAAGAAATGGAATAACTTCCAACAACACAGGTTGGAGCTGAAGGAGTGCCCA	intergenic
ASHG19A3A021553	44865.5	56114.4	15.4134	15.7989	noncoding	ENST00000472521	RPS15AP16	Ensembl	361	chr3	-	128517683	128518044		TGGCATCATGGACCATGAAGAAAGAGATGAAAATACAGGAGGGAAAATCCTGGGATTCTT	intronic antisense	NM_004637	RAB7A	ras-related protein Rab-7a	+	128444978	128533641
ASHG19A3A021797	960.012	645.423	9.81853	9.42615	noncoding	AK097849		misc_RNA	1763	chr3	-	153990874	153992637		GGCATTACTGAGTAGAAAATACATTCCAGGTCTAAGAACTGTTTGTTCTTTAGTGGATTT	intergenic
ASHG19A3A024407	3129.51	1852.35	11.5297	10.9472	noncoding	ENST00000503202	RP11-127B20.1	Ensembl	879	chr4	-	83322730	83323609		TAAAGATCCCGAGAGAAAGAGACTCTTCAGGAGGCATCAACTTCTAACTCATCTCACCAG	intergenic
ASHG19A3A042599	9095.07	7739.83	13.0802	12.9891	noncoding	uc001iwf.2	EPC1	UCSC_knowngene	919	chr10	-	32556714	32557633		GGCATACATTATCCTTAAGGTTTTTAATCCCACCTGGAAAAATTGTGATAGAATTCTCAC	intergenic
ASHG19A3L0003581	631.84	736.811	9.2065	9.61473	noncoding	chr13:40809650-40814850+	lincRNA-FOXO1-1	lincRNA	5201	chr13	+	40809650	40814850		GTTCACAAGTCATAACATCAGAATCCAACTCAGACCTCCTCATTCCATGCTTTCTAATTT	intergenic
ASHG19A3A026744	1103.49	1005.39	10.0234	10.059	noncoding	ENST00000507707	CTD-2265D6.1	Ensembl	932	chr5	-	42465501	42468970		TAGCAGATCTCACAACTGGGGAATTGTCAAAGATGAATTAACAGAGTCCCCCAAATACAT	intronic antisense	NM_000163	GHR	growth hormone receptor isoform 1 precursor	+	42424025	42721926
CUST_416_PI426073487	178.823	126.141	7.3983	7.06304	noncoding	uc.418+	uc.418	UCR	217	chr17	+	56082227	56082444		CAAAGCATTCTTAATCCATCTCTTCAGATATGTCTACAGAAAGACACATGAAAAGCAAGA	natural antisense	NM_001078166	SRSF1	serine/arginine-rich splicing factor 1 isoform	-	56078279	56084707
CUST_416_PI426073487	178.823	126.141	7.3983	7.06304	noncoding	uc.418+	uc.418	UCR	217	chr17	+	56082227	56082444		CAAAGCATTCTTAATCCATCTCTTCAGATATGTCTACAGAAAGACACATGAAAAGCAAGA	natural antisense	NM_006924	SRSF1	serine/arginine-rich splicing factor 1 isoform	-	56078279	56084707
ASHG19A3A031389	924.584	1242.91	9.76375	10.367	noncoding	ENST00000429998	RP11-513I15.6	Ensembl	4785	chr6	+	34247481	34252266		GCCCTTGATATTAGAGAATATTAAAATCACACAGTTGTGGCAAAAATCACATTGTGGCTA	intergenic
ASHG19A3A032510	279.967	306.732	8.04436	8.35342	noncoding	ENST00000451792	AC017060.1	Ensembl	442	chr7	-	17503068	17598533		AATTATTTCTGAACCTTCCCATCAGCCTTGTCTCTGATAGAATTGGCCTGTTGTGGACGG	intergenic
ASHG19A3A009156	4245.04	3407.09	11.9731	11.8089	noncoding	NR_002211	MEIS3P1	RefSeq_NR	2872	chr17	+	15690163	15693017		GGTAGGCAAAGAAACAAGTCTGGTTATTTATGTAAAAACTAGTCTAATAAAGTGAGTGGC	intergenic
ASHG19A3A048159	324.157	430.944	8.25372	8.84929	noncoding	AK057203		misc_RNA	1705	chr12	-	128255393	128295208		GCAGGACCTAATTGGCCTAGCTTTCTTGTTTCCCCCAATAATATATTTTTAGAACGGTTT	intergenic
ASHG19A3A044660	176.83	245.956	7.38192	8.02533	noncoding	uc001lkl.2	CR592586	UCSC_knowngene	870	chr10	+	131910185	131919004		TGTGGCCCAATTCCAGTTCTCCAGGGTGCTCATCACTCTGTGGCAGTTTGTCTTCTGGTT	intergenic
ASHG19A3A040393	126.347	110.816	6.90204	6.87007	noncoding	uc004evu.2	BC043223	UCSC_knowngene	1643	chrX	-	129611045	129658231		AAATGGCTCAGACTTTCAGGAAGCTTCCCCATCTTACTGCTTCTTTTCCAAAGATGGCGT	intergenic
ASHG19A3L0003241	433.614	318.465	8.66878	8.40415	noncoding	BI763082	lincRNA-TBC1D22A	lincRNA	830	chr22	+	47154429	47287216		TTACCTTCCCCGCCAATGTAGACCGGAGACCAGCCACTCTCCAGAGAAACCACAAATGAA	exon sense-overlapping	NM_014346	TBC1D22A	TBC1 domain family member 22A	+	47158517	47571342
ASHG19A3A027953	301.173	339.693	8.14893	8.4969	noncoding	AF009267		NRED	1356	chr5	+	10363293	10364634		AACTACTGATAGTGTGGCAGGAGCTAGAAAACACCCCTTTCTTCTTAGATATCCCTCCAG	intron sense-overlapping	NM_005885	6-Mar	E3 ubiquitin-protein ligase MARCH6	+	10353827	10435491
ASHG19A3A014587	2399.28	1812.95	11.1381	10.9142	noncoding	ENST00000397819	AC017070.1	Ensembl	2403	chr2	-	168570172	168572575	NR_027466,ENST00000451540,	ACTTTCATCCAAGACCTGGATTTTACCCCAACCCCACATTCTGAAGGTAGAAGCAAGTTC	intergenic
ASHG19A3A038476	2501.09	3729.74	11.1975	11.9454	noncoding	ENST00000452496	ASS1P12	Ensembl	1227	chr9	+	32945993	32947220	NM_054012,NM_000050,	TTGAAATTTGCTGAGCTGGTGTATACCGGTTTCTGGCATAGCCCTGAGTGTGAATTTGTC	intergenic
ASHG19A3A034944	9707.06	9119.85	13.1693	13.2266	noncoding	BM413624		RNAdb	912	chr7	+	116594292	116608625		ATTTCTGAGGGTTTCGGTTGCAGTTTTCAGTGATCTTTGCTCGTCTCCCTTCCCTGTAAA	intron sense-overlapping	NM_021908	ST7	suppressor of tumorigenicity 7 protein isoform	+	116593380	116863961
ASHG19A3A034944	9707.06	9119.85	13.1693	13.2266	noncoding	BM413624		RNAdb	912	chr7	+	116594292	116608625		ATTTCTGAGGGTTTCGGTTGCAGTTTTCAGTGATCTTTGCTCGTCTCCCTTCCCTGTAAA	intron sense-overlapping	NM_018412	ST7	suppressor of tumorigenicity 7 protein isoform	+	116593380	116870075
ASHG19A3A046293	170.749	89.831	7.33159	6.5594	noncoding	ENST00000395705	AC023085.1	Ensembl	1281	chr11	+	43543525	43544817		AGGCCCTGAGAGTGATCGTGTGGATAGACAGTGGCAACGACAACGTGGACATCAAGGCTG	intergenic
ASHG19A3A042659	286.913	79.5306	8.07999	6.39102	noncoding	ENST00000431395	RP11-124O11.2	Ensembl	500	chr10	-	43474464	43476955		CCCAGGTAGGAACTGCAGCTATTTTTAAACTGAGATTTCCTACAAATTAAAATTGCTTTG	intergenic
ASHG19A3A043788	3106.61	2760.55	11.5205	11.5112	noncoding	ENST00000418077	RP11-490O24.1	Ensembl	411	chr10	+	34153240	34153651		GCGGCAGTGGTCATTTGACAACAAAAGTCATACCGGAGAAAATATAACATTTAAAAAGAA	intergenic
ASHG19A3A014564	149.309	241.486	7.1408	7.99802	noncoding	AL080107		NRED	1583	chr2	-	163163606	163164969		CTCGTTGTGTCCATATTAAAATTAAAAGTACCTTGCCATAACAAAAGCACATTCTAAGCC	intron sense-overlapping	NM_022168	IFIH1	interferon-induced helicase C domain-containing	-	163123588	163175039
ASHG19A3A036603	2187.97	2216.55	10.9992	11.2055	noncoding	AF293366		misc_RNA	860	chr8	+	52730142	52730969		TATCCTTAACAAAAACTCTCTCCTGCATAGTAAAAGCATCATCTAAACAGCAGCTCCAAC	natural antisense	NM_052937	PCMTD1	protein-L-isoaspartate O-methyltransferase	-	52730139	52811735
ASHG19A3A034043	106.82	101.61	6.66749	6.74057	noncoding	ENST00000439823	AC002480.4	Ensembl	557	chr7	+	22629323	22631241		CAGTTCCTATGATATGACTACCTCAGGGCAAGAAAGTCACTGTGTCCCTGCTACAACAAA	intergenic
ASHG19A3A050044	88.3854	111.341	6.38796	6.8772	noncoding	ENST00000424853	RP11-363P13.1	Ensembl	546	chr13	+	33851689	33855471		AATTAGCTACATTAATGTTAGAACCATTTGGACCTCACCCAGGACTTCAACTACATTATG	intronic antisense	NM_178006	STARD13	stAR-related lipid transfer protein 13 isoform	-	33677271	33859901
ASHG19A3A041661	282.702	319.021	8.05862	8.40618	noncoding	ENST00000316861	AC002368.2	Ensembl	735	chrX	+	147546209	147546948		GAGCAGAGGAAAGGAAAAGGGCTCAGGTTTAAGCAACTGGAGTCATTCCTACATGATTGT	intergenic
ASHG19A3A028651	77.3172	125.033	6.19222	7.0496	noncoding	G43610		misc_RNA	101	chr5	+	114856635	114856736		TTATTAGCTGGCATCCGAATACAGTACTTCTTTTGAAAAAATACACAATGGGAACTGACA	natural antisense	NM_020177	FEM1C	protein fem-1 homolog C	-	114856607	114880591
ASHG19A3L0000403	122.218	126.099	6.85543	7.06264	noncoding	AI376773	lincRNA-P2RY2	lincRNA	495	chr11	+	72876689	72877184		AGTCTTGTTCAGGGTCAGGGTGATGGCCTTTCCTATGCTAGATCACAGCCTTATATATCA	intergenic
ASHG19A3A039769	624.658	509.56	9.19011	9.08911	noncoding	ENST00000451718	RP1-169I5.4	Ensembl	390	chrX	-	41331516	41331906		AGAGGTTCTTGAAATCCAGGAGTGTTCCATAGCTCAAGAATCCTTGGAATCCCAGAAGCA	intronic antisense	NM_022567	NYX	nyctalopin precursor	+	41306712	41334905
ASHG19A3A022140	24417.5	20237.1	14.5039	14.383	noncoding	uc003fwf.1	AF088041	UCSC_knowngene	3546	chr3	-	195961239	195964785		TGTTCTGAGTTATTTTGGATTTTGTTCTTTAGCCAAATAAAGGCAGTGTGGTTTTACCTG	intergenic
ASHG19A3A011295	242.307	237.751	7.83603	7.975	noncoding	ENST00000502686	AC139769.2	Ensembl	2291	chr19	-	24000400	24057503		TGCAAGGCCTGCTTTAGTTTGATAAATTCATGTTTCCCTTCCAGTGAAGCTGCAAGGTCA	intergenic
ASHG19A3A016821	328.085	250.698	8.27243	8.05408	noncoding	ENST00000454456	AC007163.9	Ensembl	754	chr2	+	202417581	202418335		TAACAGGCTTCCAATGACTACATGTAATTATCAGCTCCAACTTCCTTATCCTTTTCTTCT	intronic antisense	NM_001168221	ALS2CR11	amyotrophic lateral sclerosis 2 chromosomal	-	202352143	202483905
ASHG19A3A016821	328.085	250.698	8.27243	8.05408	noncoding	ENST00000454456	AC007163.9	Ensembl	754	chr2	+	202417581	202418335		TAACAGGCTTCCAATGACTACATGTAATTATCAGCTCCAACTTCCTTATCCTTTTCTTCT	intronic antisense	NM_152525	ALS2CR11	amyotrophic lateral sclerosis 2 chromosomal	-	202352143	202483905
ASHG19A3A016821	328.085	250.698	8.27243	8.05408	noncoding	ENST00000454456	AC007163.9	Ensembl	754	chr2	+	202417581	202418335		TAACAGGCTTCCAATGACTACATGTAATTATCAGCTCCAACTTCCTTATCCTTTTCTTCT	intronic antisense	NM_001168217	ALS2CR11	amyotrophic lateral sclerosis 2 chromosomal	-	202399042	202483905
ASHG19A3A016821	328.085	250.698	8.27243	8.05408	noncoding	ENST00000454456	AC007163.9	Ensembl	754	chr2	+	202417581	202418335		TAACAGGCTTCCAATGACTACATGTAATTATCAGCTCCAACTTCCTTATCCTTTTCTTCT	intronic antisense	NM_001168216	ALS2CR11	amyotrophic lateral sclerosis 2 chromosomal	-	202352143	202483905
ASHG19A3A043972	734.524	763.226	9.42982	9.66675	noncoding	ENST00000435086	RP11-448K10.1	Ensembl	1884	chr10	+	59715054	59716938		TATGTGGAAGTACCCCCTTTGAACCATCCAGCCTTCACTTTTCGTGAACCATGTACAATG	intergenic
ASHG19A3A054041	547.455	462.526	9.00007	8.94788	noncoding	CR621785		NRED	2373	chr16	-	87360621	87362994		ACTGGACTCCTCATCCCCGTAATTATTTAGAGAAGATGCAAGCAGCAGATAGTCTCCATG	exon sense-overlapping	NM_024735	FBXO31	F-box only protein 31	-	87362941	87417394
ASHG19A3A009121	199.46	193.46	7.55389	7.67852	noncoding	ENST00000437556	RP11-467I21.1	Ensembl	391	chr1	-	193726006	193726397		TGCCATTACCAAGTCCCCCTGACCACTGAATTAGCTATGAAGAAGAAAGAAGACAACACA	intergenic
ASHG19A3A043074	133.198	100.32	6.97525	6.72236	noncoding	ENST00000439659	RP11-380G5.4	Ensembl	713	chr10	-	89807891	89809580		CCTCAAAGAACATCCCCCACACAATGAACACTGAAGGCTTCCTGAGAAATAGGCAAAAAC	intergenic
ASHG19A3A038583	53173.3	49389.8	15.6822	15.6243	noncoding	ENST00000432323	RP11-576D8.1	Ensembl	225	chr1	+	205320374	205320599	NM_003096,	CAATATTGGAATGGTGGTAATATGAGGAAATAGTATCATCATGTTAGAAGCCTTGGAATG	intronic antisense	NM_018203	KLHDC8A	kelch domain-containing protein 8A	-	205305647	205326039
ASHG19A3A029793	153.482	150.632	7.18066	7.31976	noncoding	ENST00000501646	AL662799.2	Ensembl	1912	chr6	-	33395516	33421465		AAAGGAAGAGAAGGTCTCTGATGCTGGGTGGGCTAGTGGTCTGCGGTGTTTCGGAACTCG	natural antisense	NM_006772	SYNGAP1	ras GTPase-activating protein SynGAP	+	33387846	33421466
ASHG19A3A029793	153.482	150.632	7.18066	7.31976	noncoding	ENST00000501646	AL662799.2	Ensembl	1912	chr6	-	33395516	33421465		AAAGGAAGAGAAGGTCTCTGATGCTGGGTGGGCTAGTGGTCTGCGGTGTTTCGGAACTCG	bidirectional	NM_152735	ZBTB9	zinc finger and BTB domain-containing protein 9	+	33422355	33425320
ASHG19A3A052934	80807.1	100212	16.3004	16.6015	noncoding	ENST00000465295	RP11-30K9.1	Ensembl	476	chr15	+	59161857	59162333		TTTGTGAGAACCAATGGGAAGGAGTCTGAGCTGCTGGAACCTCTTCCCTACAAATTCATA	intergenic
ASHG19A3A024167	70.299	77.1749	6.05733	6.35017	noncoding	ENST00000504529	RP11-241F15.5	Ensembl	206	chr4	-	49525688	49525894		AATGCCTGGCTTGGCTGCAGCCACTGGGACACGTGGCCCTGCTTCTGTGATGCTAGGAGT	intergenic
ASHG19A3A020643	325.292	355.103	8.25873	8.56298	noncoding	ENST00000447256	RP11-176P14.1	Ensembl	426	chr3	-	2152092	2185925		ATTGTGAACTTCATGGCAATTGCTCCAGTCCCACCTGCTCCAGATACCTAAATCATGAAG	intronic antisense	NM_175607	CNTN4	contactin-4 isoform a precursor	+	2140549	3099645
ASHG19A3L0003536	187.89	305.29	7.46851	8.34678	noncoding	BE244504	lincRNA-FAM110A	lincRNA	447	chr20	-	837118	837565		GTGCTGTGTGTGTGGAAACCCAAATATGACCGTAGAGGGTGGAGCCACAAAACCAAGCTG	intergenic
ASHG19A3A029630	93.158	103.668	6.46717	6.77322	noncoding	ENST00000458236	DAQB-335A13.8	Ensembl	2835	chr6	-	29702804	29716770		GGTTTAAAAGAAAATGCCCATTGACTAATGAATGAATAAACAACATGTAGTGTATTTCTA	intergenic
ASHG19A3A053524	2122.39	1815.84	10.96	10.9174	noncoding	ENST00000400791	RP11-517A5.1	Ensembl	559	chr16	-	16187889	16189066		GAAAACACCACAGAATCATGCAGATCAAGAGGTTCAAATCTTCGTGTTCACCTTAAGAAC	intronic antisense	NM_004996	ABCC1	multidrug resistance-associated protein 1	+	16043433	16236930
ASHG19A3A053524	2122.39	1815.84	10.96	10.9174	noncoding	ENST00000400791	RP11-517A5.1	Ensembl	559	chr16	-	16187889	16189066		GAAAACACCACAGAATCATGCAGATCAAGAGGTTCAAATCTTCGTGTTCACCTTAAGAAC	intronic antisense	NM_019899	ABCC1	multidrug resistance-associated protein 1	+	16043433	16236930
ASHG19A3A053524	2122.39	1815.84	10.96	10.9174	noncoding	ENST00000400791	RP11-517A5.1	Ensembl	559	chr16	-	16187889	16189066		GAAAACACCACAGAATCATGCAGATCAAGAGGTTCAAATCTTCGTGTTCACCTTAAGAAC	intronic antisense	NM_019898	ABCC1	multidrug resistance-associated protein 1	+	16043433	16236930
ASHG19A3A053524	2122.39	1815.84	10.96	10.9174	noncoding	ENST00000400791	RP11-517A5.1	Ensembl	559	chr16	-	16187889	16189066		GAAAACACCACAGAATCATGCAGATCAAGAGGTTCAAATCTTCGTGTTCACCTTAAGAAC	intronic antisense	NM_019900	ABCC1	multidrug resistance-associated protein 1	+	16043433	16236930
ASHG19A3A053524	2122.39	1815.84	10.96	10.9174	noncoding	ENST00000400791	RP11-517A5.1	Ensembl	559	chr16	-	16187889	16189066		GAAAACACCACAGAATCATGCAGATCAAGAGGTTCAAATCTTCGTGTTCACCTTAAGAAC	intronic antisense	NM_019862	ABCC1	multidrug resistance-associated protein 1	+	16043433	16236930
ASHG19A3A026824	185.735	80.691	7.45423	6.41072	noncoding	ENST00000510053	CTD-2516K3.3	Ensembl	2025	chr5	-	56613815	56615847		TAATTAAATCCCAAAAGGACCCAGACATGGCAATAGAGATTTGTGCTATGGATACTGTCG	intergenic
CUST_171_PI426073487	1869.24	1708.02	10.7814	10.8256	noncoding	uc.173+	uc.173	UCR	276	chr5	+	133726159	133726435	NM_003337,	AATTCTTTAGATTTTTAAATTGGAGAAAAGCACTTAAAGTTTTTTATATATGAATATTAC	exon sense-overlapping	NM_003337	UBE2B	ubiquitin-conjugating enzyme E2 B	+	133706869	133727799
ASHG19A3H0000081	2229.34	2456.97	11.0291	11.3497	noncoding	nc-HOXA1-53-	nc-HOXA1-53	HOX cluster	138	chr7	-	27135887	27136025		GCCCTCTTCCCTTCTCACCTCTCGCCAGTTCATCTTTCATTGAACGGTGGGGAGGGGGCG	intergenic
ASHG19A3A038386	674.224	1122.78	9.30404	10.2219	noncoding	uc001hap.2	BC038769	UCSC_knowngene	1124	chr1	+	204110535	204112135		AATGAAGAGCATGCTTGCTTTGTGGCTCCCCATTGACTCATCCCTTCTACCTTGAGTTAT	natural antisense	NM_018208	ETNK2	ethanolamine kinase 2	-	204100189	204121307
ASHG19A3A045357	872.196	547.979	9.67806	9.19497	noncoding	uc001ody.2	AF113016	UCSC_knowngene	4135	chr11	-	65266958	65271093		ATTGGTTCTGGTCTACGTAAACACCCTCATCTTCTCAAGCTTTACCTTCTAACTTCTGCA	intergenic
ASHG19A3A032073	211.734	246.834	7.6449	8.03136	noncoding	AY927639		RNAdb	1483	chr6	+	132319845	132321331		ATCTTTCTTTAGCTGAAAAAAGCTGACCTAAACTCCATAACCACTCCCAAGAGCTTGAGG	intergenic
ASHG19A3A050965	13088.5	6818.61	13.6082	12.8134	noncoding	ENST00000315233	RP5-919J22.1	Ensembl	879	chr14	-	74844425	74845306	uc002gvw.2,	GGCCGGGGCCAAGGCTGCGGAGCTCGCGGAGGCAAGGCCGAGGATAAGGAGTGGATGCCG	intergenic
ASHG19A3L0000032	4671.33	3523.76	12.1159	11.8588	noncoding	DB327252	lincRNA-PBX1-3	lincRNA	544	chr1	-	165092806	165093350		TGATTTTATGCTTTGAACATAAGGCTGGGTCCTTCAGCTCTCCTTCCCCTCTCAGAAACA	intergenic
ASHG19A3A015953	1415.24	1448.6	10.3777	10.5882	noncoding	HIT000324184_03		H-invDB	388	chr2	+	89901315	89901826		TGTCAACAGAGTTACAGTACCCCTCCCACAGTGTTACAAGTCATAACATAAACCTCCAAG	intergenic
ASHG19A3A019429	397.624	251.186	8.54437	8.05682	noncoding	ENST00000429106	AC006946.12	Ensembl	328	chr22	-	17574501	17574829		ACCTGTGTACCCATTACCACTTTCAGAAACTGACAGTCAGACATTGTGGATGAGAACAAA	intronic antisense	NM_014339	IL17RA	interleukin-17 receptor A precursor	+	17565850	17596584
ASHG19A3A052113	233.914	87.9665	7.78395	6.52976	noncoding	AK021664		RNAdb	1800	chr15	-	48426829	48428628	uc001zwf.1,	ATAGCAGGTATTACGCCGTGCTGCAAGGTTATGGTTCTCCAGATGGACACCATTACATTT	natural antisense	NM_205850	SLC24A5	sodium/potassium/calcium exchanger 5 precursor	+	48413168	48434589
ASHG19A3A038251	299.03	217.403	8.13861	7.85041	noncoding	ENST00000457302	RP11-229P13.20	Ensembl	697	chr9	-	139931491	139932407		TCCACGTTCAGTCCCTCAGGTCACAATACACACCTATCCTGCTGGCCTGACGCAGGGGCC	intergenic
ASHG19A3A049250	4641.04	2934.89	12.107	11.5989	noncoding	ENST00000422828	RP11-408E5.7	Ensembl	798	chr13	-	19775776	19801574	NR_003272,NM_001042414,	AACTGGAGGCAGAAATGGAAGCAGCTAGGCATGAACACCAATTAATGCTAATGAGGCAAG	intergenic
ASHG19A3A052960	929.798	797.795	9.77051	9.72772	noncoding	AF070527		RNAdb	1590	chr15	+	63135273	63136827	NM_015059,	TATTTCTTTTCAATAAAAAAGGTTTGGATTCGGCCTCTTCCTCTGAGCCCACCTCCCAGC	exon sense-overlapping	NM_015059	TLN2	talin-2	+	62939509	63136829
ASHG19A3A025477	1982.56	1826.1	10.8614	10.9293	noncoding	ENST00000244249	RP11-663P9.2	Ensembl	390	chr4	+	43900473	43901368		GATAGGAAAGAAAAACTTATGCAGGAAGGAAAATTGGATCGAACAGTTCACCTATCATAT	intergenic
ASHG19A3A027171	125.635	92.1531	6.89322	6.59663	noncoding	ENST00000504077	RP11-93O17.2	Ensembl	3139	chr5	-	98858027	98861166		GCATGCGAAGAATGTTTTGTGTTTGAAATTGTTTGAGGGGTTTGGGTTTATGTTTGTTGG	intergenic
ASHG19A3L0000152	1025.35	815.99	9.91854	9.76189	noncoding	exon99-	lincRNA-C1orf83	lincRNA	715	chr1	-	54587441	54588155		TTTGCATATGTGCCTGTGGATCTAATGTTACCCCCCACACCTCACGCGAGACTGTCTCCC
ASHG19A3A016888	178.568	69.7086	7.39556	6.20317	noncoding	AK091534		RNAdb	2937	chr2	+	208467341	208470282	NM_004379,	ACGGGCCTGACATCAAATGGAAAGGAAGGATAATGTCCAGGAGTTGGAATGTTATCCTTG	exon sense-overlapping	NM_004379	CREB1	cyclic AMP-responsive element-binding protein 1	+	208394615	208470284
ASHG19A3A016888	178.568	69.7086	7.39556	6.20317	noncoding	AK091534		RNAdb	2937	chr2	+	208467341	208470282	NM_004379,	ACGGGCCTGACATCAAATGGAAAGGAAGGATAATGTCCAGGAGTTGGAATGTTATCCTTG	exon sense-overlapping	NM_134442	CREB1	cyclic AMP-responsive element-binding protein 1	+	208394615	208470284
ASHG19A3A039706	50048.8	58637.2	15.5763	15.8646	noncoding	ENST00000416765	RP1-22N22.1	Ensembl	405	chrX	-	28677181	28677586		AACGTGTAACAATTATGCCAAAAGACATCAAGCTAGCAGGCTGCATACGTGGAGAACGTG	intronic antisense	NM_014271	IL1RAPL1	interleukin-1 receptor accessory protein-like 1	+	28605680	29974017
ASHG19A3A015390	1323.21	1380.66	10.281	10.5172	noncoding	ENST00000421721	AC066692.3	Ensembl	457	chr2	+	24123562	24124019		AATATTATTAATACAAGACCAAGCAAATCCTCCCACCCAACTGGAAACATGAGTCATCCA	intronic antisense	NM_017552	ATAD2B	ATPase family AAA domain-containing protein 2B	-	23971533	24149934
ASHG19A3A008870	110.128	114.422	6.70917	6.91767	noncoding	ENST00000413694	CTA-253N17.1	Ensembl	377	chr1	-	185140465	185140842		ACGTGATTGGACGTGCGTAACTGCTAACAGCAAAAGGGGTTATGAATTACGTTACTTCCA	intronic antisense	NM_017673	SWT1	transcriptional protein SWT1	+	185126290	185260913
ASHG19A3A008870	110.128	114.422	6.70917	6.91767	noncoding	ENST00000413694	CTA-253N17.1	Ensembl	377	chr1	-	185140465	185140842		ACGTGATTGGACGTGCGTAACTGCTAACAGCAAAAGGGGTTATGAATTACGTTACTTCCA	intronic antisense	NM_001105518	SWT1	transcriptional protein SWT1	+	185126191	185260913
ASHG19A3L0002491	73.3342	84.016	6.11666	6.46703	noncoding	AK124439	lincRNA-SLC4A1AP	lincRNA	1883	chr2	-	27929629	27938599		AAGGTGACTCTAAGGTCCTATCTAGCCTTTTGATACAACATGGCTGGCTCATTTCCCCAA	intergenic
ASHG19A3A037661	170.896	119.219	7.33283	6.97942	noncoding	ENST00000427728	RP11-350E12.5	Ensembl	748	chr9	-	90559190	90559938		AAGACTCTCAGCACCAAGTCCAAGAACAACAAGAAGAGTGCGTGGCAGGCCACCACCCAG	intergenic
ASHG19A3A039318	1847.67	3016.3	10.7655	11.6367	noncoding	AK000834		misc_RNA	1395	chr9	+	132087214	132088575		TGGACTCCTTTTTAAGCCGTATTTGAGACCTAGTTGGCTTTCCCTTCCCAAGAATGTCCT	intergenic
ASHG19A3A051446	12490.8	13629.5	13.5292	13.8066	noncoding	ENST00000254302	UBE2L7P	Ensembl	465	chr14	+	55695934	55696399	NR_028437,NM_003347,ENST00000436446,	AGTAATTAGTGCTGAAAACTGGAAGCCAGCAACCAAAACCGACCAAGTAATCCAGTCCCT	intergenic
ASHG19A3A034360	83.3558	113.671	6.30218	6.90774	noncoding	ENST00000455801	RP11-419M24.3	Ensembl	843	chr7	+	55865726	55866569		GTACCATGACCTGACCTCCCAGGTGAAGGTGGCCCACTTGCAACAAGGACCGAAAGAAGT	intronic antisense	NM_207366	14-Sep	septin-14	-	55861236	55930482
ASHG19A3A017089	14413.1	18198.6	13.7474	14.2307	noncoding	ENST00000452720	AC104634.3	Ensembl	462	chr2	+	232424613	232425075		TAAGAAAGGTGATATTGTGGACACCAAGGGAACGGTACTGTTCAAAAAGGAATGCCCCAC	intergenic
ASHG19A3L0000697	107.648	98.9191	6.67929	6.70136	noncoding	AA757150	lincRNA-MBNL2-2	lincRNA	508	chr13	+	97787992	97788497		ATCTCATTCTTTCGAGAGCTATATCCTATAGAACCTGCCCCAAATGAAGGAGATCAGCCT	intergenic
ASHG19A3A023388	87.2791	78.0192	6.36792	6.36552	noncoding	ENST00000461943	RP11-103G8.4	Ensembl	441	chr3	+	150479723	150480325		TTTCTCGGTCCAAGTTTTACTGGTGCGGCCCAGCCCTACCGAGAGTACCCGAATACACGT	natural antisense	NM_005067	SIAH2	E3 ubiquitin-protein ligase SIAH2	-	150458909	150481263
ASHG19A3A040083	263.415	449.897	7.95915	8.91074	noncoding	uc004ebr.1	AK057701	UCSC_knowngene	2597	chrX	-	73498208	73512435		ATCCCACTTGACAGTTTAGAAGTGGATTGATAATACTCTTCTGGCTTAAAACCCTTCTTC	intergenic
ASHG19A3A050461	72.9899	92.9462	6.11024	6.61055	noncoding	ENST00000421601	RP11-297I6.4	Ensembl	1172	chr13	+	107306263	107324511		ACTCTCTCCAAATGTCTCCAAGCAAATTCAAAGCAGCTGAAAATAACTGCATGCCTGAGA	intergenic
ASHG19A3A050802	2946.41	1861.49	11.4317	10.9535	noncoding	ENST00000433591	RP11-423O2.2	Ensembl	593	chr1	-	142790582	142791175	ENST00000514812,ENST00000509488,	AAGCCGCTGCCTGATATCAACACTTTGTAGATGTAGTATGACTATTCTTGTATGTTTCTA	intergenic
ASHG19A3L0003482	162.918	167.425	7.26549	7.47212	noncoding	chr2:177245637-177252100-	lincRNA-MTX2-4	lincRNA	6464	chr2	-	177245637	177252100		AGGAAATCAAAGAGCAACAGTGAGGAGTCTAGTCCTGCCTGGTATATCACATACCACAGT	intergenic
ASHG19A3A030001	153.349	172.136	7.17874	7.51107	noncoding	ENST00000440377	RP11-337C18.8	Ensembl	1057	chr1	+	146644805	146646726	uc001epf.1,	CCACTCACCAAGTTTCATCCTCCATTTATGACCAAGGATAGGTATAACATCTGATCTTGA	bidirectional	NM_005399	PRKAB2	5'-AMP-activated protein kinase subunit beta-2	-	146626684	146644129
ASHG19A3A018856	288.524	336.85	8.08832	8.48447	noncoding	ENST00000457669	AP000696.2	Ensembl	1133	chr21	-	38004978	38009331		ATGGGTTTATCTTTTGGGACCAAGACATTGGGTCCCTACATGTTTTCCCCTACCCTTCTT	intergenic
ASHG19A3A035090	594.651	639.598	9.12117	9.41207	noncoding	ENST00000445459	AC018643.4	Ensembl	744	chr7	+	131945619	131956028		TTATCAATTAGTGTCTGCTGCTGCCAGTGTCACCAGTTCTCTGCCTGATGAATGATGCTA	intronic antisense	NM_020911	PLXNA4	plexin-A4 isoform 1	-	131808090	132261323
ASHG19A3A008678	197.921	142.978	7.54349	7.2403	noncoding	BC033590		misc_RNA	1074	chr17	-	60703900	60704878		GCAAAGAAGACACATTTCTCCTACCACGAGTAATCAAAAACACTATGAAACTGTAATATG	natural antisense	NM_006039	MRC2	C-type mannose receptor 2	+	60704761	60770952
ASHG19A3A018364	367.041	437.256	8.42964	8.8694	noncoding	ENST00000461248	RP1-300I2.2	Ensembl	556	chr20	+	43859508	43861972		TTATGAAGCTGAGCGGCTTCTTTCTACTCTCTGTGAACATCCTCCTTTGCCTCTGAATGA	intergenic
ASHG19A3A029234	169.735	110.094	7.32251	6.86062	noncoding	ENST00000428930	BX571672.1	Ensembl	614	chr1	+	143119060	143232318	ENST00000443548,	TCATTCCAAGATTCCTTAAAATTCTGTAATTCTATGTCCTCTTGATTCTGTCTATAGAAA	intergenic
ASHG19A3A048291	550.496	568.53	9.009	9.2445	noncoding	NR_002803	RPL13P5	RefSeq_NR	634	chr12	+	6993144	6993766	ENST00000412023,	GTCATCGCTGACTAGGAGGAAAACTTCCAGGCCTTGTTAGTCTCTGTATGGCCCATGCAA	intergenic
ASHG19A3A009886	216.278	198.01	7.67359	7.71328	noncoding	AK091326		misc_RNA	2510	chr17	+	71172653	71175163		GAGTTTGTTTCCTTTAACTATGCCCTTGATCTGTCTTTCAAAACAATGTCCCCTTATAGT	intergenic
ASHG19A3A030631	1391.51	1546.78	10.3546	10.6761	noncoding	NR_027311	LOC153910	RefSeq_NR	2290	chr6	-	142847591	142958973		AAGGTCTTAGCACTGTTTCATCTTCCCAGAAGGCTTTTCCCTCTTCCACCCTGCTTCTAG	intergenic
ASHG19A3A026923	115.097	107.321	6.76931	6.82431	noncoding	ENST00000499125	AC138832.1	Ensembl	2390	chr5	-	70830117	70834641		TGGAGTCACAGTCCTGTATCTGATGTCTTGAAATTTTTAAGTTACTTTTATTCCCATGGT	intronic antisense	NM_018429	BDP1	transcription factor TFIIIB component B''	+	70751441	70863649
ASHG19A3A038716	282.753	291.197	8.05884	8.27133	noncoding	uc004aex.2	BC080605	UCSC_knowngene	1482	chr9	+	68413445	68414927		ACAGTGAACACAAAGCCCCGCATGCTCGGGCAGGTTGGGAGAGTCCTTCTGCCTGTGCAG	intergenic
ASHG19A3A046696	535.822	740.706	8.97239	9.62406	noncoding	ENST00000429268	AP001271.4	Ensembl	356	chr11	+	70492269	70493667		AATCTGCATCACAGAAGATATCCAGTTGGGCAAGACCCCGCCTCCCTGACAGGTGGCACA	intronic antisense	NM_133266	SHANK2	SH3 and multiple ankyrin repeat domains protein	-	70313960	70507923
ASHG19A3A046696	535.822	740.706	8.97239	9.62406	noncoding	ENST00000429268	AP001271.4	Ensembl	356	chr11	+	70492269	70493667		AATCTGCATCACAGAAGATATCCAGTTGGGCAAGACCCCGCCTCCCTGACAGGTGGCACA	intronic antisense	NM_012309	SHANK2	SH3 and multiple ankyrin repeat domains protein	-	70313960	70935808
ASHG19A3A018495	746.101	892.673	9.4524	9.88614	noncoding	uc002xyu.1	CR612603	UCSC_knowngene	2570	chr20	+	56285238	56287808		AGTTAATTCAGTGGCTTAAAGAAACCAAACCTACCCACAACGCTTGACCTCCCATTGATC	natural antisense	NM_199171	PMEPA1	transmembrane prostate androgen-induced protein	-	56223451	56286541
ASHG19A3A018495	746.101	892.673	9.4524	9.88614	noncoding	uc002xyu.1	CR612603	UCSC_knowngene	2570	chr20	+	56285238	56287808		AGTTAATTCAGTGGCTTAAAGAAACCAAACCTACCCACAACGCTTGACCTCCCATTGATC	natural antisense	NM_199169	PMEPA1	transmembrane prostate androgen-induced protein	-	56223451	56285625
ASHG19A3A018495	746.101	892.673	9.4524	9.88614	noncoding	uc002xyu.1	CR612603	UCSC_knowngene	2570	chr20	+	56285238	56287808		AGTTAATTCAGTGGCTTAAAGAAACCAAACCTACCCACAACGCTTGACCTCCCATTGATC	bidirectional	NM_020182	PMEPA1	transmembrane prostate androgen-induced protein	-	56223451	56285031
ASHG19A3A018495	746.101	892.673	9.4524	9.88614	noncoding	uc002xyu.1	CR612603	UCSC_knowngene	2570	chr20	+	56285238	56287808		AGTTAATTCAGTGGCTTAAAGAAACCAAACCTACCCACAACGCTTGACCTCCCATTGATC	natural antisense	NM_199170	PMEPA1	transmembrane prostate androgen-induced protein	-	56223451	56285625
ASHG19A3A027575	61.2518	69.1664	5.85309	6.19251	noncoding	ENST00000503576	AC008427.3	Ensembl	2568	chr5	-	149362621	149365756		CCACTCCAACAGATGCCCTACACATAGGGTTTGCTTCTCATAAATATTTAAAATTGTTTA	natural antisense	NM_000112	SLC26A2	sulfate transporter	+	149340299	149366963
ASHG19A3A015537	381.077	277.555	8.4855	8.20403	noncoding	ENST00000395092	GAPDHP25	Ensembl	1002	chr2	+	38512551	38513558		ATGTTCATGATGGGCGTGAACCATAAGAAATATGAAAACAGCCTCAAGATCATCAGCAAT	intergenic
ASHG19A3A048280	269.866	166.983	7.99455	7.46868	noncoding	S79267		NRED	3429	chr12	+	6908074	6912140		ATCGCCCCTGTATACTCCAGGTCCAGTAAATGTTTGCTGACTAATGATTGGCATTTCCCT	exon sense-overlapping	NM_000616	CD4	T-cell surface glycoprotein CD4 isoform 1	+	6898637	6929976
ASHG19A3A048280	269.866	166.983	7.99455	7.46868	noncoding	S79267		NRED	3429	chr12	+	6908074	6912140		ATCGCCCCTGTATACTCCAGGTCCAGTAAATGTTTGCTGACTAATGATTGGCATTTCCCT	intron sense-overlapping	NM_001195017	CD4	T-cell surface glycoprotein CD4 isoform 3	+	6898691	6929976
ASHG19A3A048280	269.866	166.983	7.99455	7.46868	noncoding	S79267		NRED	3429	chr12	+	6908074	6912140		ATCGCCCCTGTATACTCCAGGTCCAGTAAATGTTTGCTGACTAATGATTGGCATTTCCCT	intron sense-overlapping	NM_001195014	CD4	T-cell surface glycoprotein CD4 isoform 2	+	6898691	6929976
ASHG19A3A048280	269.866	166.983	7.99455	7.46868	noncoding	S79267		NRED	3429	chr12	+	6908074	6912140		ATCGCCCCTGTATACTCCAGGTCCAGTAAATGTTTGCTGACTAATGATTGGCATTTCCCT	intron sense-overlapping	NM_001195016	CD4	T-cell surface glycoprotein CD4 isoform 3	+	6898691	6929976
ASHG19A3A048280	269.866	166.983	7.99455	7.46868	noncoding	S79267		NRED	3429	chr12	+	6908074	6912140		ATCGCCCCTGTATACTCCAGGTCCAGTAAATGTTTGCTGACTAATGATTGGCATTTCCCT	intron sense-overlapping	NM_001195015	CD4	T-cell surface glycoprotein CD4 isoform 3	+	6898691	6929976
ASHG19A3A010323	95932.1	90272.8	16.5662	16.442	noncoding	ENST00000462935	RP11-9H16.1	Ensembl	626	chr18	-	49371374	49372000		ATAAAAGGAAACAGAATGCCAAAATCAGCAGTCTCCTGGAGGAGCAGTTCCAGCAAGGAA	intergenic
ASHG19A3A012303	7089.23	6674.2	12.7138	12.7836	noncoding	NR_024282	LOC113230	RefSeq_NR	1329	chr19	+	14183820	14185873		TTTGTGAAATTGACCAGCCCCCTCTATAAAACTTACAGTCCCCCATTGGGAAACTGACCA	intergenic
ASHG19A3A019910	507.193	367.547	8.88892	8.61858	noncoding	AK125234		misc_RNA	1684	chr22	-	44349516	44351200		AGGCTGTCTGTGATAGTTAAGATGTATATATTAAAGGCTGTCTGTGATGGTTACAATGTA	bidirectional	NM_015380	SAMM50	sorting and assembly machinery component 50	+	44351260	44392412
ASHG19A3L0000532	184.954	179.968	7.44807	7.57594	noncoding	AI910857	lincRNA-GLIPR1L2	lincRNA	485	chr12	-	75841852	75842332		TGTGTCTGGAACGTTTTGCTATCCACCTGCTCTCTGTAGCCATGTTTTGGCTTCAGTTAT	intergenic
ASHG19A3A007774	503.493	592.714	8.8793	9.30421	noncoding	NR_033404	BMP1	RefSeq_NR	2784	chr8	+	22022652	22058996	NR_033403,	TTGTGTTCACCTATCGACCTTGCGGCTCGGGACCGCCCCCCTGAGCTGGCCCCGCCCTCC	exon sense-overlapping	NM_001199	BMP1	bone morphogenetic protein 1 isoform 1	+	22022652	22058996
ASHG19A3A007774	503.493	592.714	8.8793	9.30421	noncoding	NR_033404	BMP1	RefSeq_NR	2784	chr8	+	22022652	22058996	NR_033403,	TTGTGTTCACCTATCGACCTTGCGGCTCGGGACCGCCCCCCTGAGCTGGCCCCGCCCTCC	exon sense-overlapping	NM_006129	BMP1	bone morphogenetic protein 1 isoform 3	+	22022652	22069840
ASHG19A3A009174	476.306	549.623	8.80079	9.19905	noncoding	NR_003190	LOC162632	RefSeq_NR	3901	chr17	+	16690205	16707819	uc010vzg.1,uc002gty.2,	ACAGCCTTTAGAAACTCCCCTTGAACGTGCTGGGCTGACCTTCCTCTGATCACAGGCAAG	intergenic
ASHG19A3A044810	555.441	568.163	9.02034	9.24276	noncoding	ENST00000324875	AC090719.1	Ensembl	879	chr11	-	4682082	4682963		TTACCTATGTGTACCTGGTGATGCCTTCTGTGCTCCACCCCATCATTTACAGTATGAAGT	intergenic
ASHG19A3A046591	1622.88	608.132	10.5775	9.33867	noncoding	uc010rog.1	NEAT1	UCSC_knowngene	17357	chr11	+	65190268	65207625	NR_028272,CR591879,	AATCTTAAAAAGTCCACAGCAGATGCATCCGGCTCGAGGGGCCATCAGCTTTGAATAAAT	intergenic
ASHG19A3A034616	76.1609	113.864	6.17139	6.91021	noncoding	G30752		misc_RNA	278	chr7	+	77702719	77702997		AACTGCTTATGTTGGGAATTTTTTCATCCAGCGGCACCTCTATTTACCTTGGCCCTGACT	intronic antisense	NM_012301	MAGI2	"membrane-associated guanylate kinase, WW and PDZ"	-	77646373	79082890
ASHG19A3A035758	276.206	246.688	8.02639	8.03042	noncoding	BC033145		RNAdb	2724	chr8	-	53850991	53853677		AGGCTCCTCACCAGTTCCCCTAAGAATCGAATGAAATAAACTAAATATTGGTTATTTCCA	natural antisense	NM_005285	NPBWR1	neuropeptides B/W receptor type 1	+	53852467	53853454
ASHG19A3A034765	657.097	691.574	9.26748	9.52091	noncoding	AK128105		misc_RNA	3726	chr1	+	170214541	170218267		ATTTTTTCCCAGTGGTCCCTTTTTCTCTGTCTCATCCTTACATTATGGCATCCCCAGAGT	intergenic
ASHG19A3A025004	1107.4	1085.47	10.0291	10.1683	noncoding	AF130075		misc_RNA	2401	chr4	-	174388983	174391192		TCCACTTGGGGAAAATCTCATTCCCCATCCTCTTGTAATTAAAAAGCATGGTTTGTTTGT	intergenic
ASHG19A3A034459	716.563	719.012	9.39522	9.57714	noncoding	ENST00000414799	RP11-460N20.4	Ensembl	232	chr7	+	64535400	64539158		ATGCCAGCATGGGTTGTTCATCACCGCTGCTGTCCCTGCTGTCGCTCCTGGTTGGTGCGT	intergenic
ASHG19A3A029791	67019.6	75862.1	16.0201	16.2123	noncoding	ENST00000374520	RPL12P1	Ensembl	498	chr6	-	33367835	33368333	ENST00000484010,ENST00000477007,ENST00000432629,ENST00000424633,ENST00000310055,	TCTATGGGCTGTAATGTTGATGGCCACCACCCTCATGACATCATAGATGACATCAACAGT	intronic antisense	NM_002263	KIFC1	kinesin-like protein KIFC1	+	33359312	33377699
ASHG19A3A007737	1902.78	2151.05	10.8078	11.1619	noncoding	NR_033204	LOC404266	RefSeq_NR	486	chr17	+	46669681	46683772		TCTCGATGCGCCGTCGCCGGGTCAGCCGTTTCCTCTCCCTCGCCGGCCTCGGCGGAGATT	natural antisense	NM_002147	HOXB5	homeobox protein Hox-B5	-	46668618	46671103
ASHG19A3A007737	1902.78	2151.05	10.8078	11.1619	noncoding	NR_033204	LOC404266	RefSeq_NR	486	chr17	+	46669681	46683772		TCTCGATGCGCCGTCGCCGGGTCAGCCGTTTCCTCTCCCTCGCCGGCCTCGGCGGAGATT	intronic antisense	NM_018952	HOXB6	homeobox protein Hox-B6	-	46673098	46682334
ASHG19A3A016340	2302.05	1692.32	11.079	10.812	noncoding	ENST00000448112	AC068137.3	Ensembl	561	chr2	+	131028168	131029845		CGCCTAATTTCATATGAAGTTACCCTAGCCATCAGCCTATTATCAGTTCTACTGATAAGC	intergenic
ASHG19A3A010099	160.252	66.1914	7.24434	6.12806	noncoding	NR_029406	FLJ43681	RefSeq_NR	2256	chr17	+	81174665	81188573	ENST00000441866,ENST00000417636,	TCCTGATTAATGGCCGATGAATTTCTCCTTAAGGCCCTGAAACTGCCTACTCAGAACCAA	intergenic
ASHG19A3A036956	89.8402	90.8197	6.4127	6.57446	noncoding	BC024311		misc_RNA	1544	chr8	+	141601782	141603294		CTCACAAGTCAAAAACATCCTCTTTGATCCACCATCTGTCTTTACTGAACAATATTAGAA	intronic antisense	NM_001164623	EIF2C2	protein argonaute-2 isoform 2	-	141541263	141645646
ASHG19A3A036956	89.8402	90.8197	6.4127	6.57446	noncoding	BC024311		misc_RNA	1544	chr8	+	141601782	141603294		CTCACAAGTCAAAAACATCCTCTTTGATCCACCATCTGTCTTTACTGAACAATATTAGAA	intronic antisense	NM_012154	EIF2C2	protein argonaute-2 isoform 1	-	141541263	141645646
ASHG19A3A025480	122.732	164.961	6.86195	7.44908	noncoding	NR_026989	LOC339524	RefSeq_NR	1419	chr1	+	87595447	87634884		CACGACTCAAAGAAAATGTGAATAAAAGGCATCTTTGTTTCCCAGTCAAATTAGCTGATT	intergenic
ASHG19A3A052591	1303.32	1366.12	10.2597	10.5036	noncoding	ENST00000471472	CTD-3221M10.1	Ensembl	723	chr15	-	100091582	100092305		CACATATTGCATGGGGGTAACCAAGCCTGAAGTCAGTAAAAATCTACAAGCCTGGTTATG	intergenic
ASHG19A3A013021	110.513	132.463	6.71408	7.13158	noncoding	ENST00000432400	AC009892.5	Ensembl	319	chr19	+	55119336	55119843		TATTGCTGTGAGTATTTCAGTCCTGCTGGCAGGTGAGCACTCAGAGACCCCCTGCAGCTG	intergenic
ASHG19A3A051673	61.0031	77.1867	5.84696	6.35028	noncoding	AL832767		misc_RNA	4743	chr14	+	88641818	88646541		AGAGACATTGGATTGGATCTTCCAGAAGGTCTTTGTTGCAATTTTTCTCCATCATTGAAA	natural antisense	NM_021161	KCNK10	potassium channel subfamily K member 10 isoform	-	88646451	88793256
ASHG19A3A051673	61.0031	77.1867	5.84696	6.35028	noncoding	AL832767		misc_RNA	4743	chr14	+	88641818	88646541		AGAGACATTGGATTGGATCTTCCAGAAGGTCTTTGTTGCAATTTTTCTCCATCATTGAAA	natural antisense	NM_138318	KCNK10	potassium channel subfamily K member 10 isoform	-	88646451	88737255
ASHG19A3A051673	61.0031	77.1867	5.84696	6.35028	noncoding	AL832767		misc_RNA	4743	chr14	+	88641818	88646541		AGAGACATTGGATTGGATCTTCCAGAAGGTCTTTGTTGCAATTTTTCTCCATCATTGAAA	natural antisense	NM_138317	KCNK10	potassium channel subfamily K member 10 isoform	-	88646451	88789593
CUST_314_PI426073487	87.2202	89.5837	6.36693	6.55623	noncoding	uc.316+	uc.316	UCR	240	chr10	+	126905564	126905804		TGTCAGAAGCTCAAAGCCACATTGTTTCACTTGACAATCTTCCCAGAGGTGGGGAAAAAA	intergenic
ASHG19A3A039808	478.673	428.24	8.80926	8.83913	noncoding	ENST00000423038	RP11-571E6.1	Ensembl	635	chrX	-	47132764	47133789		TGATGTCACCTTCCCCTGTGTCACTCCGTTTGAGGGGATCACATTTAAGAATTATTACAC	intergenic
ASHG19A3A019149	692.876	634.171	9.34756	9.39795	noncoding	ENST00000433071	AP000251.2	Ensembl	843	chr21	+	32931536	32932800		GATAAACCTAAACCGGAAAATTGAAAGTCATCCCTGATTCCTCCTTCTTCTTAACCCTCT	bidirectional	NM_003253	TIAM1	T-lymphoma invasion and metastasis-inducing	-	32490735	32931290
ASHG19A3A020855	101644	127049	16.6413	16.9355	noncoding	ENST00000429309	AC138972.1	Ensembl	333	chr3	-	32676713	32677046	NM_000989,	GAAAATACTACAGAGTGTGCACACTGGCTATCATTGATCCAGGTGACTCTGACATCGTTA	intergenic
ASHG19A3A053659	493.613	947.118	8.84955	9.97028	noncoding	ENST00000379752	RP11-110J1.2	Ensembl	1532	chr1	-	157029022	157030554	NM_018225,	GCATCCTCTGATGGCACTGTAAAGATCTGGAATATGAAGACCACAGAATGTTCAGATACC	intergenic
ASHG19A3A021088	1235.82	662.009	10.1861	9.46137	noncoding	uc003cyi.1	AK125500	UCSC_knowngene	2755	chr3	-	50153454	50193518		CCTCCTACCCTGCCCCTGGGATCTGGAACTAAATGCTACAAATAAAAGCTAAAGGCAATT	natural antisense	NM_005778	RBM5	RNA-binding protein 5	+	50126351	50156392
ASHG19A3A021088	1235.82	662.009	10.1861	9.46137	noncoding	uc003cyi.1	AK125500	UCSC_knowngene	2755	chr3	-	50153454	50193518		CCTCCTACCCTGCCCCTGGGATCTGGAACTAAATGCTACAAATAAAAGCTAAAGGCAATT	intronic antisense	NM_004186	SEMA3F	semaphorin-3F precursor	+	50192847	50226508
ASHG19A3A018758	100.845	119.679	6.58579	6.98564	noncoding	ENST00000406413	AP000567.27	Ensembl	156	chr21	-	31898863	31899019		GATGGTGGTTATGGCTGTGACCATTCTTATCCCTCTTTCTATGAAGGATATTGGTAATCT	intergenic
ASHG19A3A021715	143.924	191.096	7.08434	7.66033	noncoding	NR_033439	PLSCR4	RefSeq_NR	3400	chr3	-	145910125	145968651	NM_001128305,	GGGATGGGGGTCCTGGCTGCACTTCACGGGGGCGGCCCTTTCGTTTCGCTCTGCGTGACA	exon sense-overlapping	NM_001177304	PLSCR4	phospholipid scramblase 4 isoform c	-	145910123	145968966
ASHG19A3A021715	143.924	191.096	7.08434	7.66033	noncoding	NR_033439	PLSCR4	RefSeq_NR	3400	chr3	-	145910125	145968651	NM_001128305,	GGGATGGGGGTCCTGGCTGCACTTCACGGGGGCGGCCCTTTCGTTTCGCTCTGCGTGACA	exon sense-overlapping	NM_001128306	PLSCR4	phospholipid scramblase 4 isoform b	-	145910123	145968966
ASHG19A3A021715	143.924	191.096	7.08434	7.66033	noncoding	NR_033439	PLSCR4	RefSeq_NR	3400	chr3	-	145910125	145968651	NM_001128305,	GGGATGGGGGTCCTGGCTGCACTTCACGGGGGCGGCCCTTTCGTTTCGCTCTGCGTGACA	exon sense-overlapping	NM_020353	PLSCR4	phospholipid scramblase 4 isoform a	-	145910123	145968966
ASHG19A3A045027	64.1831	91.6152	5.92447	6.58829	noncoding	uc009yjc.1	EF565102	UCSC_knowngene	403	chr11	-	27645540	27656128		AATGACGGGAGTGTGAGATCCACCACATGGCGAGGCACCCCAGGAACCTGTTTTCTTCTT	intergenic
ASHG19A3A021072	86.6624	82.3884	6.35708	6.43922	noncoding	uc003cxd.1	AK096387	UCSC_knowngene	2603	chr3	-	49586738	49591799		GTTCTGTTTGCAGGAAGAGAGTGATAGGCACACAAATTATTTCCAATAAACTACAGAAAA	bidirectional	NM_003458	BSN	protein bassoon	+	49591921	49708982
ASHG19A3A055087	150.712	159.729	7.15439	7.40486	noncoding	uc001kct.2	BC051760	UCSC_knowngene	1855	chr10	-	85926985	85931832		ggcacttggagtccggacatctacaacttggcccaaccaccgagaccacccttaaacatc	intergenic
ASHG19A3A010188	38202.9	34988.2	15.1755	15.1387	noncoding	ENST00000473808	RP11-254G11.1	Ensembl	480	chr18	-	18699142	18699622	ENST00000490908,	AATGATCAGAAAAAGAAAGAAGCCAAAGAGAAAGGCACCTGGGTTCAACTGAAGCCCCAG	intergenic
ASHG19A3A008580	306.487	302.267	8.17386	8.33127	noncoding	ENST00000511580	RP11-506D12.3	Ensembl	565	chr17	-	48917417	48919707		ATCTTCCTCCTTATATTTGAGGAAGAAATGAGGACGCCCCACAAGGACCTTCTTCAGCTT	natural antisense	NM_175575	WFIKKN2	"WAP, kazal, immunoglobulin, kunitz and NTR"	+	48912604	48919709
ASHG19A3A014240	938.165	1118.46	9.78364	10.2147	noncoding	ENST00000435407	AC024704.2	Ensembl	416	chr2	-	114586966	114588696		TGAATCACTCCCCCACTGAGGAAGAAACCATCTGTGGAAAAGACTGTATAAGGTACTTCC	intergenic
ASHG19A3A019630	4543.32	4822.82	12.0761	12.3145	noncoding	ENST00000425548	CTA-373H7.5	Ensembl	448	chr22	-	27040852	27041300	NM_194279,	AAGAACTGATCCGAAGCTCATTTCAAGTGTCAAACAATCCTCAAGCACAGCAAGGCTGCT	intergenic
ASHG19A3A051572	1808.36	1334.66	10.7359	10.4688	noncoding	NR_027046	LOC145474	RefSeq_NR	1859	chr14	+	71954577	71956418		ATATATTCTTCAGTGTGATTTAGGTGAGTCAGGAATTTTTCCTCTGGAGACTGCCTAAAT	intergenic
ASHG19A3A013247	155.394	121.531	7.19736	7.00762	noncoding	ENST00000418970	AC017076.4	Ensembl	2347	chr2	-	7052407	7058813		AATGTAACGTCTCATCTTCAGCCCATCTGTGCTACTGATCATCTCATTCCAGAAGCCATG	intronic antisense	NM_014746	RNF144A	probable E3 ubiquitin-protein ligase RNF144A	+	7057522	7184309
ASHG19A3A053043	893.281	504.495	9.71404	9.07595	noncoding	AK123669		misc_RNA	2155	chr15	+	72882031	72884186		ATCTAATTGCTGGTCTTCCTGGTATGAACAAAGATGTTTGCTTGTTAATAAATTCCTACC	intergenic
ASHG19A3A014034	135.228	158.923	6.99597	7.39658	noncoding	ENST00000414112	AC009237.5	Ensembl	510	chr2	-	96161769	96162279	ENST00000443564,	ATTGTTGATGCTGATCAAATTTCCCTTATATACACCATCCATAATTGCTCCTTCTCACCT	intergenic
ASHG19A3A037844	70.7164	126.689	6.06577	7.07	noncoding	ENST00000457720	RP11-217B7.3	Ensembl	606	chr9	-	107753076	107754062		TTTTTAACTGGCAAGGTTTCGAGTTCCCAACCACAGCACCCTCAGTGATGGTTTTCAGAA	intergenic
ASHG19A3A024616	99.2341	115.777	6.5636	6.93424	noncoding	ENST00000513690	RP11-380D23.2	Ensembl	446	chr4	-	111516670	111536614		TGCAACCACCACCTCGGTTCCACTCAACCGATTTTTGCTGCATGTCAACACTTATTACCG	intergenic
ASHG19A3A007730	862.757	799.311	9.66297	9.73086	noncoding	NR_033196	ZFAND1	RefSeq_NR	691	chr8	-	82615149	82633539	NR_033195,NR_033194,NR_033193,	TGTGATGATTGTTCAGGAATATTTTGGTGACTGTAATCAATGAGAGACTGAAGACAGATC	exon sense-overlapping	NM_001170797	ZFAND1	AN1-type zinc finger protein 1 isoform c	-	82615148	82633539
ASHG19A3A007730	862.757	799.311	9.66297	9.73086	noncoding	NR_033196	ZFAND1	RefSeq_NR	691	chr8	-	82615149	82633539	NR_033195,NR_033194,NR_033193,	TGTGATGATTGTTCAGGAATATTTTGGTGACTGTAATCAATGAGAGACTGAAGACAGATC	exon sense-overlapping	NM_024699	ZFAND1	AN1-type zinc finger protein 1 isoform a	-	82613565	82633539
ASHG19A3A007730	862.757	799.311	9.66297	9.73086	noncoding	NR_033196	ZFAND1	RefSeq_NR	691	chr8	-	82615149	82633539	NR_033195,NR_033194,NR_033193,	TGTGATGATTGTTCAGGAATATTTTGGTGACTGTAATCAATGAGAGACTGAAGACAGATC	exon sense-overlapping	NM_001170796	ZFAND1	AN1-type zinc finger protein 1 isoform b	-	82613565	82633539
ASHG19A3A032777	11673	12078.1	13.4369	13.6274	noncoding	ENST00000455449	AC073115.5	Ensembl	532	chr7	-	46037138	46037670		TCACTTCCTAGATGAGGAAGTTAAACTCATCAAGAAGATGGGTGACCACCTGACCAACCT	intergenic
ASHG19A3L0000808	1016.27	1356.98	9.9059	10.4934	noncoding	AK226132	lincRNA-ZFP106	lincRNA	5684	chr15	-	42707320	42783303	NM_022473,	TTTTCCAGGAAAGGCTCCAGTGGTTCTTACTTGATCCAAAAAATGTCAAGAATTAATCTA	exon sense-overlapping	NM_022473	ZFP106	zinc finger protein 106 homolog	-	42705020	42749730
ASHG19A3A050190	4917.55	3650.39	12.1871	11.9128	noncoding	ENST00000495613	RP11-480P3.1	Ensembl	1093	chr13	+	50746224	50747317	NR_002183,NM_003932,ENST00000508958,	CCTAGGGCACAGAAAATTGCAGAACATCAGAGAAAGTATGAGCGAAAACGTGAAGAGTGA	intergenic
ASHG19A3A041211	420.777	503.848	8.62088	9.07448	noncoding	AY927529		RNAdb	751	chrX	+	75392763	75393514		TGGGGGGAGCCACCGCGCCCGGCCTTGGGGGGAGCCTTGAACTCTTTTTCCTCCTTTCTA	exon sense-overlapping	NM_016500	CXorf26	hypothetical protein LOC51260	+	75392770	75398033
ASHG19A3A055098	1195.51	769.395	10.1397	9.67801	noncoding	uc001odi.3	SLC22A20	UCSC_knowngene	1244	chr11	+	65003879	65009572		CGCCCGGCAGCCACCCCATCTGGGAAGGTCAAAGAAGGCTCTTCCAAGAAACATGTAGAA	intergenic
ASHG19A3A028175	153.971	172.827	7.18479	7.51706	noncoding	uc001ebq.1	AK092511	UCSC_knowngene	2131	chr1	+	112282462	112290420		AGCCCTGCCCTCGCGGGCGGAGCAGAGACGCCGCCGCTTGGCCGGTTCACGCCTGTCACA	intronic antisense	NM_198926	C1orf183	hypothetical protein LOC55924 isoform 2	-	112264685	112298419
ASHG19A3A028175	153.971	172.827	7.18479	7.51706	noncoding	uc001ebq.1	AK092511	UCSC_knowngene	2131	chr1	+	112282462	112290420		AGCCCTGCCCTCGCGGGCGGAGCAGAGACGCCGCCGCTTGGCCGGTTCACGCCTGTCACA	bidirectional	NM_019099	C1orf183	hypothetical protein LOC55924 isoform 1	-	112264685	112282046
ASHG19A3A039741	32456.1	23025.7	14.9286	14.5552	noncoding	ENST00000449334	RP11-348H3.2	Ensembl	478	chr1	+	212997368	212997846		ATAACATTTCCCTGCAGGATTACATTGCAGTGAAGAAGTATGCCAAGCACCTGCCTCACA	intergenic
ASHG19A3A010531	6673.57	5486.97	12.6197	12.5056	noncoding	ENST00000423510	RP11-164O23.5	Ensembl	105	chr1	-	207323521	207323626	NM_006947,	GAAAAAGAAGAAAGGTGGAAAAGGTGGTTGGTGATGAGAATATTCTTGTTGCAGGCTGTT	intergenic
ASHG19A3A016513	155.011	134.051	7.19315	7.14773	noncoding	AK125488		misc_RNA	2371	chr2	+	160760474	160762841		TTTAAATCTCGTCTTTGCTGAGCACATAATGTGTACTTGAGGTGGCCTCCATCCTTGTTG	natural antisense	NM_002349	LY75	lymphocyte antigen 75 precursor	-	160659867	160761267
ASHG19A3A016513	155.011	134.051	7.19315	7.14773	noncoding	AK125488		misc_RNA	2371	chr2	+	160760474	160762841		TTTAAATCTCGTCTTTGCTGAGCACATAATGTGTACTTGAGGTGGCCTCCATCCTTGTTG	natural antisense	NM_001198760	LY75-CD302	LY75-CD302 fusion protein isoform 2 precursor	-	160625138	160761267
ASHG19A3A016513	155.011	134.051	7.19315	7.14773	noncoding	AK125488		misc_RNA	2371	chr2	+	160760474	160762841		TTTAAATCTCGTCTTTGCTGAGCACATAATGTGTACTTGAGGTGGCCTCCATCCTTGTTG	natural antisense	NM_001198759	LY75-CD302	LY75-CD302 fusion protein isoform 1 precursor	-	160625138	160761267
ASHG19A3A016564	6946.99	5095.48	12.6857	12.3968	noncoding	AK124958		misc_RNA	1922	chr2	+	170495991	170497913		GTGGAAGGAAAAAACATAAATGAAGTTAATGCACTTCTTTTCCTAGCCCAAAAGTCACTG	intergenic
ASHG19A3A030044	79.8172	65.9097	6.24005	6.12308	noncoding	ENST00000394808	RP1-34L19.1	Ensembl	2100	chr6	-	53071395	53073495		ATAAAGGGCACATACACAGAATATGGCTTTGGCCTCTTCAACAACCATCAGCTTGGAACC	intergenic
ASHG19A3A021805	186.795	186.917	7.46167	7.62874	noncoding	ENST00000486545	RP11-439C8.2	Ensembl	521	chr3	-	154687071	154688012		CTGTTGATTGCGATTTCTGTTTGAAAATGGAATCTTGAGCATCTGTTCTCTCCTTTTATA	intergenic
ASHG19A3A019800	71.6188	65.6298	6.08268	6.1162	noncoding	NR_002821	LOC400927	RefSeq_NR	494	chr22	-	38740669	38794931		CTGCACCTGAGTACAGCACCCAGGCGTCTTCTGCAGCCCACAGAAGGTTCAGCTTAGGGC	intergenic
ASHG19A3A052906	24560	19756.5	14.5158	14.3507	noncoding	ENST00000399198	RP11-209K10.1	Ensembl	888	chr15	+	53176695	53178670	ENST00000445182,	TGAAAAAGAAAAGCAGGCTGCTGTTGAAAAGGCTGTGACCAAGGAGGAATTTCAGGGTGA	intergenic
ASHG19A3A011089	1153.87	1243.19	10.0877	10.3681	noncoding	BC128553		misc_RNA	172	chr19	-	12786183	12786329		TTATCTGTGGCTGGGCTGTACCCTGGTTTCTGAGGTCCCTGGGCACCCCCCATCTCAGTC	intronic antisense	NM_001099737	WDR83	WD repeat domain-containing protein 83	+	12777617	12786646
ASHG19A3A011089	1153.87	1243.19	10.0877	10.3681	noncoding	BC128553		misc_RNA	172	chr19	-	12786183	12786329		TTATCTGTGGCTGGGCTGTACCCTGGTTTCTGAGGTCCCTGGGCACCCCCCATCTCAGTC	intronic antisense	NM_032332	WDR83	WD repeat domain-containing protein 83	+	12780516	12786646
ASHG19A3A012854	1206.47	1178.78	10.1527	10.29	noncoding	uc002pik.2	BC033836	UCSC_knowngene	1943	chr19	+	48758945	48761444		CCGCCCAAGAATGATTGTTAATTTCCGTCCATCATTTTCCTTTGATTGTTCTTCATCTCG	natural antisense	NM_001184904	CARD8	caspase recruitment domain-containing protein 8	-	48741517	48759203
ASHG19A3A012854	1206.47	1178.78	10.1527	10.29	noncoding	uc002pik.2	BC033836	UCSC_knowngene	1943	chr19	+	48758945	48761444		CCGCCCAAGAATGATTGTTAATTTCCGTCCATCATTTTCCTTTGATTGTTCTTCATCTCG	natural antisense	NM_001184902	CARD8	caspase recruitment domain-containing protein 8	-	48711342	48759203
ASHG19A3A033174	160.194	182.582	7.24372	7.5965	noncoding	ENST00000424151	AC006378.3	Ensembl	314	chr7	-	93594721	93597702		GGGTACAAACTGTATTTCCAACACTTCTAGCCCTATATATACCTGTCAATGATATTATAC	intergenic
CUST_938_PI426073487	1031.9	865.229	9.92872	9.84483	noncoding	uc.459-	uc.459	UCR	255	chrX	-	21534559	21534814		TTCAACTGCCACCCCACCTGGTAACCAGCAAAATCATTACAATAAAATTGAGGTACAGTA	natural antisense	NM_001168647	CNKSR2	connector enhancer of kinase suppressor of ras 2	+	21392535	21672813
CUST_938_PI426073487	1031.9	865.229	9.92872	9.84483	noncoding	uc.459-	uc.459	UCR	255	chrX	-	21534559	21534814		TTCAACTGCCACCCCACCTGGTAACCAGCAAAATCATTACAATAAAATTGAGGTACAGTA	intronic antisense	NM_001168649	CNKSR2	connector enhancer of kinase suppressor of ras 2	+	21392535	21660980
CUST_938_PI426073487	1031.9	865.229	9.92872	9.84483	noncoding	uc.459-	uc.459	UCR	255	chrX	-	21534559	21534814		TTCAACTGCCACCCCACCTGGTAACCAGCAAAATCATTACAATAAAATTGAGGTACAGTA	natural antisense	NM_001168648	CNKSR2	connector enhancer of kinase suppressor of ras 2	+	21392535	21660980
CUST_938_PI426073487	1031.9	865.229	9.92872	9.84483	noncoding	uc.459-	uc.459	UCR	255	chrX	-	21534559	21534814		TTCAACTGCCACCCCACCTGGTAACCAGCAAAATCATTACAATAAAATTGAGGTACAGTA	natural antisense	NM_014927	CNKSR2	connector enhancer of kinase suppressor of ras 2	+	21392535	21672813
ASHG19A3A019482	90.3007	152.629	6.41983	7.33757	noncoding	ENST00000415503	AC006547.13	Ensembl	508	chr22	-	20050502	20053600		AAAGGCCTCGAAATGCGCTCACCAAAGCCTCAGAGTTTTATTATCAGGAGCTCACATTCA	natural antisense	NM_152906	C22orf25	hypothetical protein LOC128989	+	20008630	20053447
CUST_298_PI426073487	163.398	225.178	7.26965	7.89647	noncoding	uc.300+	uc.300	UCR	208	chr10	+	102547117	102547325		CAGGGGCAGCTCTTGGCAAGGTGAAAGAAAATTGCATATTCAATCTCCATCCATGAATCT	intron sense-overlapping	NM_003989	PAX2	paired box protein Pax-2 isoform d	+	102505467	102589698
CUST_298_PI426073487	163.398	225.178	7.26965	7.89647	noncoding	uc.300+	uc.300	UCR	208	chr10	+	102547117	102547325		CAGGGGCAGCTCTTGGCAAGGTGAAAGAAAATTGCATATTCAATCTCCATCCATGAATCT	intron sense-overlapping	NM_003988	PAX2	paired box protein Pax-2 isoform c	+	102505467	102589698
CUST_298_PI426073487	163.398	225.178	7.26965	7.89647	noncoding	uc.300+	uc.300	UCR	208	chr10	+	102547117	102547325		CAGGGGCAGCTCTTGGCAAGGTGAAAGAAAATTGCATATTCAATCTCCATCCATGAATCT	intron sense-overlapping	NM_000278	PAX2	paired box protein Pax-2 isoform b	+	102505467	102589698
CUST_298_PI426073487	163.398	225.178	7.26965	7.89647	noncoding	uc.300+	uc.300	UCR	208	chr10	+	102547117	102547325		CAGGGGCAGCTCTTGGCAAGGTGAAAGAAAATTGCATATTCAATCTCCATCCATGAATCT	intron sense-overlapping	NM_003987	PAX2	paired box protein Pax-2 isoform a	+	102505467	102589698
CUST_298_PI426073487	163.398	225.178	7.26965	7.89647	noncoding	uc.300+	uc.300	UCR	208	chr10	+	102547117	102547325		CAGGGGCAGCTCTTGGCAAGGTGAAAGAAAATTGCATATTCAATCTCCATCCATGAATCT	intron sense-overlapping	NM_003990	PAX2	paired box protein Pax-2 isoform e	+	102505467	102589698
ASHG19A3A053297	2262.87	2201.58	11.0501	11.1956	noncoding	uc010box.2	DJ031154	UCSC_knowngene	950	chr15	+	100348034	100379278		CCCCCTCCCTTGTATCAAATATTGTCTCTGATAATAATACATTGAGTTATTTGTAGTTCC	intergenic
ASHG19A3A043310	126886	141978	16.9811	17.0871	noncoding	ENST00000430685	RP11-214N15.5	Ensembl	241	chr10	-	114308390	114308631	uc011mct.1,NM_001402,ENST00000436459,ENST00000325349,	AAATTCTTAAAGTCTGGTGATGCTGCCATTGTTGGTATGGTTCCTGGCAAGCCCATGTGT	intronic antisense	NM_145206	VTI1A	vesicle transport through interaction with	+	114206755	114578504
ASHG19A3A051762	13485	5434.34	13.6472	12.488	noncoding	ENST00000448875	AL162151.3	Ensembl	158	chr14	+	99439650	99439808	NM_001033853,NM_000967,ENST00000417878,ENST00000413027,ENST00000396745,	TAAGGATGACCCGTCCAAGCCGGTCCACCTCACAGCCTTCCTGGGATACAAGGCTGGCAT	intergenic
ASHG19A3A029987	3639.94	2107.9	11.7561	11.1309	noncoding	ENST00000434225	RBMXP1	Ensembl	306	chr6	-	48180387	48181905		ATGATCATGATCATGACTATTCAGATCATCCAAGTGGAAGTTCCTACAGAGATTCATATG	intergenic
ASHG19A3A052493	91.7824	66.9112	6.44638	6.14297	noncoding	ENST00000400817	AC103965.1	Ensembl	2545	chr15	-	84868063	84898722		GTGTGTCCTTGCATGGCCTATGAAGTGTGTTGTGGGATAACCGTGTGTATTGAACTCTCA	intergenic
ASHG19A3A028799	73.5475	66.466	6.1205	6.13359	noncoding	ENST00000509051	CTB-49A3.2	Ensembl	466	chr5	+	132496129	132559995		GGGAATAGAACCCTTGGAGCGTGTAGATGGGATACCACGGTCTTCCAGCTCCTATTGCAG	natural antisense	NM_015082	FSTL4	follistatin-related protein 4 precursor	-	132532151	132948223
ASHG19A3L0003312	169.688	200.842	7.32197	7.73522	noncoding	BE796744	lincRNA-ZPLD1-1	lincRNA	961	chr3	-	104348945	104626311		TTTTTTAGCGACAGAAAATCTCACCCTATATCCAATGGGGGTTCACCACCATGATGGCGT	intergenic
ASHG19A3A014332	530.494	512.114	8.9557	9.09652	noncoding	uc002tpy.1	AK095330	UCSC_knowngene	3793	chr2	-	130783575	130789491		CCCATTATAAATACCTTCCACTATGATGGGCTTATATTCTCCTATTCTCCTCTAGCACTT	intergenic
ASHG19A3A024619	123.101	118.884	6.86614	6.97552	noncoding	ENST00000513113	AC004062.1	Ensembl	688	chr4	-	111866267	111866955		TCTCTTACGGTTGAAAAACTAAAAACTTTGGCGATCCAGCCAATGTGACCTTTAAAACCT	intergenic
ASHG19A3A033250	104.996	84.3839	6.64225	6.47315	noncoding	HIT000012886		H-invDB	1865	chr7	-	99791583	99793447		AATAATAACCCCTCTGCATGTGGTTATTCGGACTATTCAGAAGCCCTAGCTGGCATTATA	natural antisense	NM_012447	STAG3	cohesin subunit SA-3	+	99775537	99812010
ASHG19A3A026462	10595.7	5230.31	13.2996	12.4358	noncoding	ENST00000512318	SDHAP3	Ensembl	985	chr5	-	1568779	1593402	NM_004168,	GTTGTGGGAAAATCAGCAAGCTCTACGGAGACCTAAAGCACCTGAAGACGTTCGACCGGG	intergenic
ASHG19A3A032454	893.222	589.429	9.71395	9.29547	noncoding	ENST00000342275	RP11-740N7.1	Ensembl	897	chr7	-	6874471	6920187	ENST00000514634,ENST00000361653,ENST00000344740,	TCAAACTCTCAGAGGATCCAGAACTGCAGCCGGTCGTTGCTGGGCTGTTCCTGTCCATGT	intergenic
ASHG19A3A024370	82767.1	100969	16.3408	16.6172	noncoding	ENST00000510190	RP11-123J14.2	Ensembl	310	chr4	-	77880012	77880322	NM_003329,	CAAAAGGTGGGTGAATTTTCTGGGGCCAATAAGGAAAAGCTTGAAGCCACCATAATGAAT	intronic antisense	NM_018243	11-Sep	septin-11	+	77870894	77959768
ASHG19A3A026979	133.909	106.244	6.98294	6.80955	noncoding	AK058164		RNAdb	1433	chr5	-	76721767	76723199		CTGACAGCCACATTTTTAAAAATATATTTTGTTTACCTTTAGGCTCACCCTGTGTCACTA	natural antisense	NM_001029854	PDE8B	high affinity cAMP-specific and IBMX-insensitive	+	76506705	76724080
ASHG19A3A026979	133.909	106.244	6.98294	6.80955	noncoding	AK058164		RNAdb	1433	chr5	-	76721767	76723199		CTGACAGCCACATTTTTAAAAATATATTTTGTTTACCTTTAGGCTCACCCTGTGTCACTA	natural antisense	NM_001029851	PDE8B	high affinity cAMP-specific and IBMX-insensitive	+	76506705	76724080
ASHG19A3A026979	133.909	106.244	6.98294	6.80955	noncoding	AK058164		RNAdb	1433	chr5	-	76721767	76723199		CTGACAGCCACATTTTTAAAAATATATTTTGTTTACCTTTAGGCTCACCCTGTGTCACTA	natural antisense	NM_003719	PDE8B	high affinity cAMP-specific and IBMX-insensitive	+	76506705	76724080
ASHG19A3A026979	133.909	106.244	6.98294	6.80955	noncoding	AK058164		RNAdb	1433	chr5	-	76721767	76723199		CTGACAGCCACATTTTTAAAAATATATTTTGTTTACCTTTAGGCTCACCCTGTGTCACTA	natural antisense	NM_001029853	PDE8B	high affinity cAMP-specific and IBMX-insensitive	+	76506705	76724080
ASHG19A3A026979	133.909	106.244	6.98294	6.80955	noncoding	AK058164		RNAdb	1433	chr5	-	76721767	76723199		CTGACAGCCACATTTTTAAAAATATATTTTGTTTACCTTTAGGCTCACCCTGTGTCACTA	natural antisense	NM_001029852	PDE8B	high affinity cAMP-specific and IBMX-insensitive	+	76506705	76724080
ASHG19A3A021396	1206.49	1051.19	10.1527	10.1189	noncoding	ENST00000498515	RP11-696F10.1	Ensembl	228	chr3	-	109696386	109696614		AAGAAAAAAGAGATGCTGCAGATGGCATGTGCCTAGTGTCACAGCAACTGCTGTATTCAG	intergenic
ASHG19A3A043572	554.234	529.709	9.01734	9.14576	noncoding	ENST00000417112	RP11-554I8.2	Ensembl	917	chr10	+	6779343	6780988		TGACTTTTGGAAATCTGATTGACTGGCACACTCTCTCTGCCTCTTTCTTTCTCAACATTT	intergenic
ASHG19A3A044034	4020.57	4894.99	11.8971	12.3339	noncoding	ENST00000415623	RP11-9E13.4	Ensembl	438	chr10	+	70184316	70184754		GGTACTCACCCAAACAAGGTGGTTATCACCAGGCTAAATCTCAACAAGGATCGGAAAAAA	intronic antisense	NM_001080449	DNA2	DNA2-like helicase	-	70173820	70231730
ASHG19A3A055194	341.202	331.685	8.3243	8.46388	noncoding	uc003fif.1	AK127557	UCSC_knowngene	3125	chr3	-	172308502	172312373		GTCCCAGAAATCCCTAGTCCTCCATCAGAGaagcagctagtgtgtactgctctcacagag	intergenic
ASHG19A3A049421	555.521	167.802	9.02048	7.47532	noncoding	ENST00000454681	RP11-141M1.3	Ensembl	844	chr13	-	33929342	34250905		TAAAAATGTAATGGAATTGCAGAGTTGTTGGCATTCAGATGTGTAGGTGGTGGGTGGCAA	intergenic
ASHG19A3A030902	5030.23	5865.13	12.2198	12.6001	noncoding	AY927635		RNAdb	2188	chr6	+	3150252	3152439		ATTAAAATGGATTTTTCTAGAGTAACCACCAGATCACCTCCCCCACTCTCAGTCCGTTTT	intron sense-overlapping	NM_004332	BPHL	valacyclovir hydrolase precursor	+	3118925	3153432
ASHG19A3A018483	118.142	87.0324	6.80657	6.51567	noncoding	ENST00000366097	RP11-560A15.3	Ensembl	770	chr20	+	55689970	55697148		TCAGGTGGAGTCTGTGGTTCCCATGGTTCCTAGAGTGAGGACTCATCCTGCCAGATGGAG	intergenic
ASHG19A3A007974	1924.23	1007.25	10.8233	10.0617	noncoding	ENST00000450587	AC005324.4	Ensembl	669	chr17	-	15607545	15608214	NM_014501,	TGAAGGGACCCCATATGCTGGAGGTCTGTTCCGCATGAAACTCCTGCTGGGGAAGGACTT	intronic antisense	NM_020652	ZNF286A	zinc finger protein 286A	+	15602890	15624100
ASHG19A3A007974	1924.23	1007.25	10.8233	10.0617	noncoding	ENST00000450587	AC005324.4	Ensembl	669	chr17	-	15607545	15608214	NM_014501,	TGAAGGGACCCCATATGCTGGAGGTCTGTTCCGCATGAAACTCCTGCTGGGGAAGGACTT	intronic antisense	NM_001130842	ZNF286A	zinc finger protein 286A	+	15602890	15624100
ASHG19A3A050454	4130.47	2854.51	11.9314	11.5617	noncoding	ENST00000423940	AL390877.1	Ensembl	420	chr1	-	118320708	118321128	NM_017761,	CAAGCTAAACAGAACTATGCTGGTGCCAAATTTAGTGAGCCGCCATCACCAAGTGTTCTT	intergenic
ASHG19A3A022599	321.282	164.169	8.24141	7.44154	noncoding	ENST00000422983	RP11-25O10.1	Ensembl	703	chr1	+	53038785	53039488		AGTTGCAATCTCATCGCTGGAATGTTCCAGCAGTTGAACAAACTGAGAAAGAATGCCTTT	intergenic
ASHG19A3A023795	104.88	141.932	6.64098	7.22877	noncoding	G36731		misc_RNA	465	chr3	+	197615948	197616413		AACCTGTAGATGAGTCATCTTTGAGGTACCAGGTGTTTCTTAACTCTCTCCAAGTCCTTC	natural antisense	NM_001134435	IQCG	IQ domain-containing protein G	-	197615947	197676796
ASHG19A3A023795	104.88	141.932	6.64098	7.22877	noncoding	G36731		misc_RNA	465	chr3	+	197615948	197616413		AACCTGTAGATGAGTCATCTTTGAGGTACCAGGTGTTTCTTAACTCTCTCCAAGTCCTTC	natural antisense	NM_032263	IQCG	IQ domain-containing protein G	-	197615945	197686886
ASHG19A3L0002300	261.197	271.681	7.94487	8.17217	noncoding	BG925695	lincRNA-CASK-2	lincRNA	461	chrX	-	43134151	43134491		TCATGGTTCTTCAGTGTCAAATGACTTTCCCCTCATTTCTGGAATCCATACGTAGGCATA	intergenic
ASHG19A3A016989	109803	121297	16.7583	16.8679	noncoding	ENST00000456160	AC009974.11	Ensembl	467	chr2	+	219706321	219706788	ENST00000446445,	TATATTTGACTGGCTCCTGATTACAATGCTTTGGATGTTGCCAACAAAATTGGGATCATC	intergenic
ASHG19A3A040520	108.262	77.1921	6.68611	6.35035	noncoding	G36544		misc_RNA	463	chrX	-	150158777	150159240		CCAAGTGGCCTCAACTTGACAGCCTCTTTAAAACTCAATGTTTGCCTAATCAAAGATCAT	natural antisense	NM_005342	HMGB3	high mobility group protein B3	+	150151762	150159248
ASHG19A3A054475	162.212	224.234	7.25972	7.89109	noncoding	uc002dxm.2	LOC23117	UCSC_knowngene	1138	chr16	+	30234297	30235813	uc002djn.3,uc002dit.2,	TTTGGGTGATGATGGTTCCACGTCAGCGGCCCTCCGCCTCTTGGGTTTGCGTGACGGTTC	intergenic
ASHG19A3A032209	111.728	150.03	6.7306	7.31456	noncoding	ENST00000392260	RP11-472G23.7	Ensembl	808	chr6	+	150363681	150364489		ATGATTCTGTGGATTACCAGACATTGTGGTAGGGAAAGGACTCACTTTCTCATCCCATGG	intergenic
ASHG19A3A007646	206.775	204.75	7.60755	7.76311	noncoding	NR_028388	FUS	RefSeq_NR	5084	chr16	+	31191430	31206190		TCTTCTTATGGCCAGAGCCAGAACACAGGCTATGGAACTCAGTCAACTCCCCAGGGATAT	exon sense-overlapping	NM_001170634	FUS	RNA-binding protein FUS isoform 2	+	31191430	31206192
ASHG19A3A007646	206.775	204.75	7.60755	7.76311	noncoding	NR_028388	FUS	RefSeq_NR	5084	chr16	+	31191430	31206190		TCTTCTTATGGCCAGAGCCAGAACACAGGCTATGGAACTCAGTCAACTCCCCAGGGATAT	exon sense-overlapping	NM_004960	FUS	RNA-binding protein FUS isoform 1	+	31191430	31206192
ASHG19A3A007646	206.775	204.75	7.60755	7.76311	noncoding	NR_028388	FUS	RefSeq_NR	5084	chr16	+	31191430	31206190		TCTTCTTATGGCCAGAGCCAGAACACAGGCTATGGAACTCAGTCAACTCCCCAGGGATAT	exon sense-overlapping	NM_001170937	FUS	RNA-binding protein FUS isoform 3	+	31191430	31206192
ASHG19A3A024338	54.3399	76.1242	5.67862	6.33012	noncoding	uc003hii.3	AK027257	UCSC_knowngene	2546	chr4	-	75881183	75895572		AATCTGCTCCCAGGCCAAGACAATACAACCAAATCATCTGGATGCAAGTCAAGCTATGAG	intronic antisense	NM_015393	PARM1	prostate androgen-regulated mucin-like protein 1	+	75858284	75975325
ASHG19A3L0000103	983.367	1178.49	9.85618	10.2897	noncoding	BF511988	lincRNA-TOMM20-1	lincRNA	521	chr1	+	235062091	235062598		ATTTACTTGAAAGAGACCTCATGCCAAAAAATGCATAGCATCATCCCCCACCTGCTCAGT	intergenic
ASHG19A3A015205	341.647	376.915	8.32565	8.6515	noncoding	ENST00000458377	AC005237.4	Ensembl	559	chr2	-	241955015	242003533		TCTGCTGTCTCCCAGCGCCTGCCACTCAGCAGAGGCCGTCTGCAACCCACAACTATTGCT	natural antisense	NM_001080437	SNED1	"sushi, nidogen and EGF-like domain-containing"	+	241938254	242033643
ASHG19A3A020171	454.089	468.744	8.73414	8.96616	noncoding	uc010gto.2	LOC96610	UCSC_knowngene	3179	chr22	+	22652462	22664057		AAGCCACTGGGTTGCAAGTTCAGATGGTCTTTCTTGTTTTTCTTAGCTAATTGTAAGTAA	intergenic
ASHG19A3H0000205	21594.7	27253.6	14.3207	14.7923	noncoding	nc-HOXC10-129-	nc-HOXC10-129	HOX cluster	260	chr12	+	54378513	54378773		CTCCACCCCTCTACCTCCCCTGCCGCCCGGGGGGCGCTTCCTTTGTTCGCGGGGAAGGGC	intergenic
ASHG19A3A043970	255.196	315.293	7.9143	8.39193	noncoding	X98261		NRED	686	chr10	+	58118391	58120977		AAACTCAACCAGGATCTTGGCTGGCAGTTCTGCCTCCTCCTGCAGGCCTACAGGTTCCAA	natural antisense	NM_001005413	ZWINT	ZW10 interactor isoform b	-	58117198	58121034
ASHG19A3A043970	255.196	315.293	7.9143	8.39193	noncoding	X98261		NRED	686	chr10	+	58118391	58120977		AAACTCAACCAGGATCTTGGCTGGCAGTTCTGCCTCCTCCTGCAGGCCTACAGGTTCCAA	natural antisense	NM_032997	ZWINT	ZW10 interactor isoform a	-	58117198	58121034
ASHG19A3A043970	255.196	315.293	7.9143	8.39193	noncoding	X98261		NRED	686	chr10	+	58118391	58120977		AAACTCAACCAGGATCTTGGCTGGCAGTTCTGCCTCCTCCTGCAGGCCTACAGGTTCCAA	natural antisense	NM_007057	ZWINT	ZW10 interactor isoform a	-	58117198	58121034
ASHG19A3A037406	464.408	442.065	8.76431	8.88563	noncoding	ENST00000415209	AL591471.1	Ensembl	141	chr9	-	42553922	42554063		TGGGCAGAGGCACTCCTCACTTCCCAGGGGCTGCGTATGAATCACAATGTAGGGGATAAA	intergenic
ASHG19A3A019508	852.897	674.764	9.6459	9.48652	noncoding	ENST00000437860	AC007050.14	Ensembl	327	chr22	-	21051047	21053224		AGGCAGTCAATAAGATGTCCCTGCACAACCTTGCCACTGTCTTTGGCCCCATGCTGCTCC	intergenic
ASHG19A3H0000094	24291.2	17999.3	14.4936	14.2119	noncoding	nc-HOXB9-193-	nc-HOXB9-193	HOX cluster	858	chr17	-	46768301	46769159	ENST00000461606,	CAGAAAATGTTGACATTACTCTGAAGGGATGCACAGTTATTGTGAAGGGCCCCAGAGGAA	intergenic
ASHG19A3A023817	919.914	841.624	9.75558	9.80537	noncoding	NR_002451	ABCA11P	RefSeq_NR	1895	chr4	-	419223	467998		CCTGCGGGTATTGGATGATTCGTAGCTAAGACTTCGCGACACCCTTGAAGCTGAGAAATG	exon sense-overlapping	NM_133474	ZNF721	zinc finger protein 721	-	433778	493442
ASHG19A3A034077	195.247	170.097	7.52501	7.49368	noncoding	NR_015364	LOC441204	RefSeq_NR	1649	chr7	+	26443106	26535982		ACTCTGAATCCAGTGCTCTTTCTACTTCACCATAGACACATGCCCCTTGAGTATAAGGGA	intergenic
ASHG19A3A008387	92.8748	114.81	6.46324	6.92223	noncoding	AK023939		misc_RNA	3065	chr17	-	41434887	41437957		GGTACGTCACTATCCAGTCTACTTTTTCCATTGACGTGGCTGAGTCATATGTAGTATGAC	intergenic
ASHG19A3A054851	1112.14	1208.04	10.0341	10.3254	noncoding	uc002fih.2	AK057887	UCSC_knowngene	3732	chr16	+	84696933	84700665		TTTAACATGAACAGAATGTGTGGTTCTGAAGGTGTGTGGGGGTCTCAAGAAATTGTCCTT	intergenic
ASHG19A3A031700	2341.91	1880.63	11.1026	10.9699	noncoding	ENST00000402650	RP11-789A7.1	Ensembl	695	chr6	+	71874778	71875473	NM_006330,ENST00000513113,	TGTCAACAGGAAATGATGAATGTCAAGCAATTCATTGATAAACTCCTACCTCCAATTGAT	intergenic
ASHG19A3A053405	103.771	98.9417	6.62463	6.70176	noncoding	NR_027274	LOC100128788	RefSeq_NR	1371	chr16	-	2787076	2794798		AAACTGGGTTCACACAACAAGCTCGGACTCCTCTTAACACTCCTGATTGGTGACATTATG	intergenic
ASHG19A3A011559	41849.2	52466.7	15.306	15.6951	noncoding	ENST00000436287	ACTBP11	Ensembl	1126	chr1	-	224051427	224052553		ATGAAACTACCTTCAACTCCATCACGAAGTGTGACGTGGACATCTGCAAAGACCTGTACT	intergenic
ASHG19A3A046706	448.826	413.139	8.71841	8.78478	noncoding	ENST00000511464	AP000867.14	Ensembl	255	chr11	+	71279725	71279980	ENST00000502328,	AGTGCAGTTGCTGCAAACTCTGCTGCTGCTCCTCAGGCTGTGAATCAACCTGCTCCCAGT	intergenic
ASHG19A3A051162	192.514	150.915	7.50532	7.32233	noncoding	uc001ymn.2	BX161461	UCSC_knowngene	1557	chr14	-	103653558	103655365		AATCCCACAGGAGCTGTCGCTGATCTTTGTCCTCTATTCGCTGAAATAAAGTTCACCATG	intergenic
ASHG19A3A054444	2270.8	2347.65	11.0573	11.2864	noncoding	ENST00000355407	AC009093.1	Ensembl	465	chr16	+	29260172	29260639		TTTTCTCTTCTAAGAACACTTGTCATTGAATTCACAGCCCTCCCTACTTCAGAACAATCT	intergenic
ASHG19A3A035500	2683.1	2773.37	11.3026	11.5188	noncoding	uc003wsr.1	CR590086	UCSC_knowngene	1374	chr8	-	9412656	9414030		AGGTGTCCCCTTGAGCTCTTGTCCCTTCCCTATAATTTTTCTCACCCTATGTGCTTTAAT	natural antisense	NM_003747	TNKS	tankyrase-1	+	9413444	9639856
ASHG19A3A010177	119128	130309	16.8834	16.9716	noncoding	ENST00000494882	RP11-681N23.1	Ensembl	321	chr18	-	13919601	13919922	NM_021029,NM_001001,ENST00000490372,ENST00000451203,ENST00000443749,ENST00000413334,ENST00000399253,	TGCAAGCATTTTGAACTGGGAGGAGATAAGAAGAGAAAGGGCCAAGTGATCCCGTTCTAA	intergenic
ASHG19A3A008754	201.43	187.391	7.56839	7.63194	noncoding	uc002jis.3	BC039327	UCSC_knowngene	2060	chr17	-	69093914	69198318		CTTTAAATACTCATGTCACATTTGTGCTGTTGCCAATGCTTCTCAGACCCTCCAGATGAG	intergenic
ASHG19A3A040172	36211.9	48557.8	15.0977	15.6002	noncoding	ENST00000404582	RP11-568G11.3	Ensembl	967	chr1	+	220426911	220427878	NM_206839,NM_006792,NM_006791,	AGAATTCTGCAACTTTGTTTAGTGCCAGCGATTATGAAGTGGCTCCTCCTGAGTACCATC	intronic antisense	NM_012414	RAB3GAP2	rab3 GTPase-activating protein non-catalytic	-	220321609	220445843
ASHG19A3L0000181	179.36	204.817	7.4019	7.76345	noncoding	AK309032	lincRNA-LMO4-3	lincRNA	1152	chr1	+	87678351	87717014		GTTTCTCTTTTCTCTCTGAGAATGTTAGACCTCTGATCTAATTCTCCACTGCTTCCTGCT	intergenic
ASHG19A3A008459	379.891	704.848	8.48038	9.54949	noncoding	BC018035		NRED	458	chr17	-	43921245	43972139		GGCGAGGACGGGAGAGGACAGCGGAGGAGGAGAAGGTGGCTGTGGTGGCGGCGGCAGAAG	natural antisense	NM_001203251	MAPT	microtubule-associated protein tau isoform 7	+	43971747	44105699
ASHG19A3A008459	379.891	704.848	8.48038	9.54949	noncoding	BC018035		NRED	458	chr17	-	43921245	43972139		GGCGAGGACGGGAGAGGACAGCGGAGGAGGAGAAGGTGGCTGTGGTGGCGGCGGCAGAAG	natural antisense	NM_005910	MAPT	microtubule-associated protein tau isoform 2	+	43971747	44105699
ASHG19A3A008459	379.891	704.848	8.48038	9.54949	noncoding	BC018035		NRED	458	chr17	-	43921245	43972139		GGCGAGGACGGGAGAGGACAGCGGAGGAGGAGAAGGTGGCTGTGGTGGCGGCGGCAGAAG	natural antisense	NM_016841	MAPT	microtubule-associated protein tau isoform 4	+	43971747	44105699
ASHG19A3A008459	379.891	704.848	8.48038	9.54949	noncoding	BC018035		NRED	458	chr17	-	43921245	43972139		GGCGAGGACGGGAGAGGACAGCGGAGGAGGAGAAGGTGGCTGTGGTGGCGGCGGCAGAAG	natural antisense	NM_016835	MAPT	microtubule-associated protein tau isoform 1	+	43971747	44105699
ASHG19A3A008459	379.891	704.848	8.48038	9.54949	noncoding	BC018035		NRED	458	chr17	-	43921245	43972139		GGCGAGGACGGGAGAGGACAGCGGAGGAGGAGAAGGTGGCTGTGGTGGCGGCGGCAGAAG	natural antisense	NM_001203252	MAPT	microtubule-associated protein tau isoform 8	+	43971747	44105699
ASHG19A3A008459	379.891	704.848	8.48038	9.54949	noncoding	BC018035		NRED	458	chr17	-	43921245	43972139		GGCGAGGACGGGAGAGGACAGCGGAGGAGGAGAAGGTGGCTGTGGTGGCGGCGGCAGAAG	natural antisense	NM_001123066	MAPT	microtubule-associated protein tau isoform 6	+	43971747	44105699
ASHG19A3A008459	379.891	704.848	8.48038	9.54949	noncoding	BC018035		NRED	458	chr17	-	43921245	43972139		GGCGAGGACGGGAGAGGACAGCGGAGGAGGAGAAGGTGGCTGTGGTGGCGGCGGCAGAAG	natural antisense	NM_016834	MAPT	microtubule-associated protein tau isoform 3	+	43971747	44105699
ASHG19A3A008459	379.891	704.848	8.48038	9.54949	noncoding	BC018035		NRED	458	chr17	-	43921245	43972139		GGCGAGGACGGGAGAGGACAGCGGAGGAGGAGAAGGTGGCTGTGGTGGCGGCGGCAGAAG	natural antisense	NM_001123067	MAPT	microtubule-associated protein tau isoform 5	+	43971747	44105699
ASHG19A3A008459	379.891	704.848	8.48038	9.54949	noncoding	BC018035		NRED	458	chr17	-	43921245	43972139		GGCGAGGACGGGAGAGGACAGCGGAGGAGGAGAAGGTGGCTGTGGTGGCGGCGGCAGAAG	intronic antisense	NM_175882	IMP5	signal peptide peptidase-like 2C precursor	+	43922255	43924438
ASHG19A3A007656	169.031	166.721	7.31566	7.46587	noncoding	NR_028412	APOC1P1	RefSeq_NR	939	chr19	+	45430059	45434643		GTGGTTCTGTCGATCGTCTTGGAAGCCAGGCGTTGTGGTGCGCGCTTGGCTACTTGGGAG	intergenic
ASHG19A3A054857	144.925	164.325	7.09456	7.44288	noncoding	ENST00000393255	AC025280.1	Ensembl	399	chr16	+	84954082	84954483		ACTCCCGCCAACAGCAGCCGTTCCCCTAACTATAAGATGCTCAAGGAGGAGCAAGAGGTG	intergenic
ASHG19A3A022344	1608.29	2033.65	10.5631	11.0797	noncoding	ENST00000412769	RP11-329A14.1	Ensembl	1257	chr1	+	48901638	48902895	NM_018571,	CCTTGGACTGAGCCAGAATGTGATTTTCCTGATGAAAAAGACTCATACTTGGAATTCTAG	intronic antisense	NM_019073	SPATA6	spermatogenesis-associated protein 6 precursor	-	48761043	48937876
ASHG19A3A015510	127.829	101.034	6.91877	6.73173	noncoding	ENST00000453451	AC012593.1	Ensembl	580	chr2	+	35024916	35388178		CTTTTCTGACCACGGTTTTCTGGAGTTTTTTCGTATGGAGTTTGTAAGCTTCCTGACATG	intergenic
ASHG19A3A050245	1415.55	1295.09	10.3787	10.4232	noncoding	ENST00000452680	RP11-485H8.2	Ensembl	848	chr1	-	116399584	116400440		AACTTTGGTGGTGGTCATGGAGGTAGTTTTTGGAATGACAACTTTGGTCATGGAGGAAAC	intergenic
ASHG19A3A026980	365.005	245.912	8.42213	8.02492	noncoding	AK092482		RNAdb	2386	chr5	-	76723251	76725632		GCATGGCACAACATACTGCATGGGCTTACACCCAGAAAATTTGGATTTTAATAAAAATTT	natural antisense	NM_001029854	PDE8B	high affinity cAMP-specific and IBMX-insensitive	+	76506705	76724080
ASHG19A3A026980	365.005	245.912	8.42213	8.02492	noncoding	AK092482		RNAdb	2386	chr5	-	76723251	76725632		GCATGGCACAACATACTGCATGGGCTTACACCCAGAAAATTTGGATTTTAATAAAAATTT	natural antisense	NM_001029851	PDE8B	high affinity cAMP-specific and IBMX-insensitive	+	76506705	76724080
ASHG19A3A026980	365.005	245.912	8.42213	8.02492	noncoding	AK092482		RNAdb	2386	chr5	-	76723251	76725632		GCATGGCACAACATACTGCATGGGCTTACACCCAGAAAATTTGGATTTTAATAAAAATTT	natural antisense	NM_003719	PDE8B	high affinity cAMP-specific and IBMX-insensitive	+	76506705	76724080
ASHG19A3A026980	365.005	245.912	8.42213	8.02492	noncoding	AK092482		RNAdb	2386	chr5	-	76723251	76725632		GCATGGCACAACATACTGCATGGGCTTACACCCAGAAAATTTGGATTTTAATAAAAATTT	natural antisense	NM_001029853	PDE8B	high affinity cAMP-specific and IBMX-insensitive	+	76506705	76724080
ASHG19A3A026980	365.005	245.912	8.42213	8.02492	noncoding	AK092482		RNAdb	2386	chr5	-	76723251	76725632		GCATGGCACAACATACTGCATGGGCTTACACCCAGAAAATTTGGATTTTAATAAAAATTT	natural antisense	NM_001029852	PDE8B	high affinity cAMP-specific and IBMX-insensitive	+	76506705	76724080
ASHG19A3A007207	301.462	323.327	8.15023	8.42745	noncoding	NR_023385	RNF216L	RefSeq_NR	2155	chr7	+	5013615	5037798		AGGACACTATGCAATCACCCGAAAGGGGTTGGCATCTGCACATCCTTCCTGGGCATCTCG	intergenic
ASHG19A3A025851	65040.5	70666.4	15.9726	16.1228	noncoding	ENST00000413177	RP11-289C17.1	Ensembl	1513	chr4	+	103817881	103819394	ENST00000452851,ENST00000445594,ENST00000428454,ENST00000426076,	AAAGGTATAGCTGTACCACAAGACCACCAAGCTAAAGAGGCTGCCCAGAAAGCAGTTAAT	intronic antisense	NM_001100874	NHEDC1	sodium/hydrogen exchanger-like domain-containing	-	103806204	103940896
ASHG19A3L0001385	123.513	112.319	6.87059	6.89074	noncoding	AF130085		misc_RNA	2359	chr3	-	40993412	41278958		CCAAAAGAAACATGGTTAACAAACAGGGCATTCTCCTCTGTAAAGTTTGTGAAATCATTT	natural antisense	NM_001098210	CTNNB1	catenin beta-1	+	41240941	41281939
ASHG19A3L0001385	123.513	112.319	6.87059	6.89074	noncoding	AF130085		misc_RNA	2359	chr3	-	40993412	41278958		CCAAAAGAAACATGGTTAACAAACAGGGCATTCTCCTCTGTAAAGTTTGTGAAATCATTT	natural antisense	NM_001098209	CTNNB1	catenin beta-1	+	41240941	41281939
ASHG19A3L0001385	123.513	112.319	6.87059	6.89074	noncoding	AF130085		misc_RNA	2359	chr3	-	40993412	41278958		CCAAAAGAAACATGGTTAACAAACAGGGCATTCTCCTCTGTAAAGTTTGTGAAATCATTT	natural antisense	NM_001904	CTNNB1	catenin beta-1	+	41240941	41281939
ASHG19A3A041717	71.1908	110.304	6.07464	6.86276	noncoding	ENST00000433225	AC151960.1	Ensembl	199	chrX	+	152415691	152416269		CCCATATCCACTCAACACATTCACTGACAAACTCGCTCACACAGGGTCATCTGATTGTAA	intergenic
ASHG19A3A015096	388.193	443.232	8.51117	8.88936	noncoding	AF085934		misc_RNA	449	chr2	-	231330480	231330918		TGGGATCCTGCCCAGCTCTCTCCATAATCCTCTGTGTGTATTATTTGGAAATGCCTCTTT	intronic antisense	NM_001206701	SP100	nuclear autoantigen Sp-100 isoform 3	+	231280870	231372861
ASHG19A3A015096	388.193	443.232	8.51117	8.88936	noncoding	AF085934		misc_RNA	449	chr2	-	231330480	231330918		TGGGATCCTGCCCAGCTCTCTCCATAATCCTCTGTGTGTATTATTTGGAAATGCCTCTTT	intronic antisense	NM_001206703	SP100	nuclear autoantigen Sp-100 isoform 5	+	231280870	231335250
ASHG19A3A015096	388.193	443.232	8.51117	8.88936	noncoding	AF085934		misc_RNA	449	chr2	-	231330480	231330918		TGGGATCCTGCCCAGCTCTCTCCATAATCCTCTGTGTGTATTATTTGGAAATGCCTCTTT	intronic antisense	NM_001206704	SP100	nuclear autoantigen Sp-100 isoform 6	+	231281470	231335250
ASHG19A3A015096	388.193	443.232	8.51117	8.88936	noncoding	AF085934		misc_RNA	449	chr2	-	231330480	231330918		TGGGATCCTGCCCAGCTCTCTCCATAATCCTCTGTGTGTATTATTTGGAAATGCCTCTTT	intronic antisense	NM_001080391	SP100	nuclear autoantigen Sp-100 isoform 1	+	231280870	231410317
ASHG19A3A015096	388.193	443.232	8.51117	8.88936	noncoding	AF085934		misc_RNA	449	chr2	-	231330480	231330918		TGGGATCCTGCCCAGCTCTCTCCATAATCCTCTGTGTGTATTATTTGGAAATGCCTCTTT	intronic antisense	NM_001206702	SP100	nuclear autoantigen Sp-100 isoform 4	+	231280870	231335250
ASHG19A3A015096	388.193	443.232	8.51117	8.88936	noncoding	AF085934		misc_RNA	449	chr2	-	231330480	231330918		TGGGATCCTGCCCAGCTCTCTCCATAATCCTCTGTGTGTATTATTTGGAAATGCCTCTTT	intronic antisense	NM_003113	SP100	nuclear autoantigen Sp-100 isoform 2	+	231280870	231381244
ASHG19A3A032809	2374.75	2124.09	11.1247	11.1418	noncoding	ENST00000444843	CTD-2021A8.2	Ensembl	739	chr7	-	51454059	51454798	ENST00000434161,ENST00000426314,	TTGACTTTTGGTGGCCTCTTCAGGCCCAGAACTTGACCTCCAGTCGGCCTTGGCAGGCCC	intergenic
ASHG19A3A048103	35799.7	31133.4	15.0812	14.9799	noncoding	ENST00000495697	RP11-18C24.2	Ensembl	534	chr12	-	121031817	121032351		AACACATCAATCTGGGTATCAAATATGACCCAAGTGTGGGTGTCTATGGCCTGGACTTCT	intergenic
ASHG19A3L0000859	52.8939	65.1071	5.63935	6.10458	noncoding	BU632228	lincRNA-ERCC4	lincRNA	582	chr16	+	13453085	13453940		AGTTTATGGGTCACTTCTTTTTTCTAGCAGATGCGGTTGGTGCCAGTGTCACTTTCCTTG	intergenic
ASHG19A3A000494	1256.26	1421.73	10.2074	10.5616	noncoding	ENST00000512530	AC007497.1	Ensembl	1920	chr16	+	53676109	53678911		ATCCGCCTACTCAGCCTCCGGAGTAGCTGAGGCAGGAGAATTGCTAGAACGTGGGAAGAG	intronic antisense	NM_001127897	RPGRIP1L	protein fantom isoform b	-	53633817	53737771
ASHG19A3A000494	1256.26	1421.73	10.2074	10.5616	noncoding	ENST00000512530	AC007497.1	Ensembl	1920	chr16	+	53676109	53678911		ATCCGCCTACTCAGCCTCCGGAGTAGCTGAGGCAGGAGAATTGCTAGAACGTGGGAAGAG	intronic antisense	NM_015272	RPGRIP1L	protein fantom isoform a	-	53633817	53737771
ASHG19A3A020726	47938.5	49741.4	15.5118	15.6358	noncoding	ENST00000396959	KRT18P17	Ensembl	1279	chr3	-	12828891	12830170	ENST00000507275,ENST00000453838,ENST00000449496,ENST00000435622,ENST00000415349,	AGATCAACAATGCCCATCTTGCTGCTGATGACTTTAGAGTCAAGTATGAGACAGAGCTGG	intergenic
ASHG19A3A007679	94.6353	119.626	6.4921	6.98471	noncoding	NR_028581	G6PC3	RefSeq_NR	1848	chr17	+	42148097	42153711		AGTGGCTCAACCTCATCTTCAAGTGAAGCATGCTTTGTGCTGGGCATCACGGTAGCTGCT	exon sense-overlapping	NM_138387	G6PC3	glucose-6-phosphatase 3	+	42148097	42153712
ASHG19A3A021326	200.946	167.673	7.56466	7.4744	noncoding	ENST00000439836	RP11-118N24.1	Ensembl	939	chr3	-	94655929	94656868		AATTACCTGTTTGCAGTTCAACCCCAAGTTCATGACTTTTGCCAGTGCGTGTTCCAGCAT	intergenic
ASHG19A3A022091	1267	1267.88	10.2181	10.3971	noncoding	ENST00000434379	RP11-655G22.2	Ensembl	478	chr3	-	191670137	191670615		ATTATCCTGATTGGCTGTCCTTTCTCCTTCTGCTGCGGCCCGAAGGGCGAAGACAACCTC	intergenic
ASHG19A3A013898	18440.7	24777.6	14.1018	14.6649	noncoding	uc002snv.3	BC024248	UCSC_knowngene	1179	chr2	-	78639672	78769187		GGCAATCCTGATTTAAAACTAAGACTGGCTTGTGGTTAAATGAATGTGTTCAGTTTTTGA	intergenic
ASHG19A3H0000088	237.917	203.501	7.80842	7.7544	noncoding	nc-HOXB2-162-	nc-HOXB2-162	HOX cluster	178	chr17	-	46623286	46623464		CCCACCACACTCATGCACACACATAACGCTGATCTGAACTTTGAGAGTGCTCTAAGTTAA	intergenic
ASHG19A3A051733	57.5184	156.161	5.75961	7.37163	noncoding	NR_015340	SERPINA13	RefSeq_NR	1718	chr14	+	95107061	95113330		CAGTAATTACCATTGAGCAAACACCTACTATGTACCAAATGCTTTCTATCTCTTATCTCA	intergenic
ASHG19A3A045566	155.517	179.1	7.19855	7.57061	noncoding	AK129753		misc_RNA	2007	chr11	-	86620031	86622038		TGTCCTCTTTTTACTGAAATAGGGGCCCTTGTTGATGGTAGTCACTGCCCATGCTGTTTA	intergenic
ASHG19A3A014374	6599.72	7167.19	12.6054	12.8813	noncoding	ENST00000419962	AC073869.17	Ensembl	1030	chr2	-	132142033	132143063	ENST00000444325,	TATAAAAAGAAAATGACAGTTCAAAAACACAAAACCCGTATCATTCCTCCCCCCACTCAT	intergenic
ASHG19A3A050947	385.119	288.213	8.50052	8.25751	noncoding	G36563		misc_RNA	410	chr14	-	73740918	73741328		TTGGTAATAAAAGTCACCTTTCAGAGCTTTGGTCCCTGTAATGCCCGTCTTTCCTGTGTC	natural antisense	NM_173462	PAPLN	papilin	+	73704204	73741347
ASHG19A3A040649	823.871	562.676	9.59812	9.23025	noncoding	ENST00000414053	RP4-617A9.4	Ensembl	816	chrX	+	2822944	2824122		ATGATTCTTCTACCTATGACTCTCAGTGCTGTTGCCTCTTCCTCTGGATCTTGGAAGCTT	natural antisense	NM_001669	ARSD	arylsulfatase D precursor	-	2822010	2847392
ASHG19A3A031817	731.643	782.038	9.42251	9.70092	noncoding	ENST00000403367	RP1-72A23.1	Ensembl	482	chr6	+	89769346	89769828	NM_007077,NM_001128126,	TTCGTTGTGGTTGGAGTTAATGACACTGAGAACAAGATGGCTATTTATGAATTCATTCAT	intergenic
ASHG19A3A033711	138.738	125.204	7.03216	7.05146	noncoding	ENST00000437833	RP11-122G18.5	Ensembl	1806	chr1	+	161337811	161341754		GCTTCAGTTGCCTTAACTAGTTGCCTTGGCATCATTAATAAGTTTTCTTTTCCTCTACTG	bidirectional	NM_001013625	C1orf192	hypothetical protein LOC257177	-	161334520	161337664
ASHG19A3A014767	135.441	79.0956	6.99808	6.38292	noncoding	ENST00000500441	AC008122.1	Ensembl	4740	chr2	-	190728384	190734541		GTTCAATGGCTCTCTTCATTTGACTATTGTATCGTTCCAAGTCTTTAGTAGCCTTCTCTT	natural antisense	NM_001128144	PMS1	PMS1 protein homolog 1 isoform c	+	190648810	190742355
ASHG19A3A014767	135.441	79.0956	6.99808	6.38292	noncoding	ENST00000500441	AC008122.1	Ensembl	4740	chr2	-	190728384	190734541		GTTCAATGGCTCTCTTCATTTGACTATTGTATCGTTCCAAGTCTTTAGTAGCCTTCTCTT	natural antisense	NM_000534	PMS1	PMS1 protein homolog 1 isoform a	+	190648810	190742355
ASHG19A3A014767	135.441	79.0956	6.99808	6.38292	noncoding	ENST00000500441	AC008122.1	Ensembl	4740	chr2	-	190728384	190734541		GTTCAATGGCTCTCTTCATTTGACTATTGTATCGTTCCAAGTCTTTAGTAGCCTTCTCTT	natural antisense	NM_001128143	PMS1	PMS1 protein homolog 1 isoform b	+	190648810	190742355
ASHG19A3A020158	88.1735	80.4487	6.38506	6.40596	noncoding	uc002zvv.2	BC089413	UCSC_knowngene	359	chr22	+	22380461	22380948		TACCAACAGATTTCTCACGGTGCTCCCAAAACTGTGATGTTTGGAAATTCTCTGCCCTCA	intergenic
ASHG19A3A026918	1665.03	1053.01	10.6129	10.1215	noncoding	NR_026578	LOC647859	RefSeq_NR	578	chr5	-	70370029	70388897	NM_002538,	AGAGCAGGAAGGTCAAAGAGAACAGAGCAAGATCACTATGAGACAGACTACACAACTGGT	intergenic
ASHG19A3A037865	972.607	1295.97	9.83676	10.424	noncoding	ENST00000449233	RP11-380I20.2	Ensembl	177	chr9	-	110616063	110616539		ATGAAAAAGCAGAGTGACTTGGTTAAGGGGAAAGCACCAAGATGATGGGCTTTCTGTTGC	intergenic
ASHG19A3A029430	295.104	246.513	8.11981	8.02898	noncoding	ENST00000455973	RP11-359N11.1	Ensembl	470	chr6	-	14230005	14231801		TAGGCTCTGCAAATTTCATCCCCACCTTTGGCCCTTCAGGCCTAGGGCAAGTCACAGCTC	intergenic
ASHG19A3A046779	125.348	91.347	6.89054	6.58224	noncoding	ENST00000447519	AP001189.4	Ensembl	1426	chr11	+	76368099	76374910		ATTCCTTACTTAAAGCAGAAACAACAAAATGACCTGTGATGGAGCCCCAGCTGTGTCAGG	natural antisense	NM_005512	LRRC32	leucine-rich repeat-containing protein 32	-	76368567	76381044
ASHG19A3A046779	125.348	91.347	6.89054	6.58224	noncoding	ENST00000447519	AP001189.4	Ensembl	1426	chr11	+	76368099	76374910		ATTCCTTACTTAAAGCAGAAACAACAAAATGACCTGTGATGGAGCCCCAGCTGTGTCAGG	natural antisense	NM_001128922	LRRC32	leucine-rich repeat-containing protein 32	-	76368567	76381791
ASHG19A3A051682	118.151	85.7562	6.80677	6.49445	noncoding	ENST00000500463	AL138478.1	Ensembl	3509	chr14	+	89622525	89627743		CGGCTGTTAAAAGATGGATCGTTTTAAAAACTGTGTTTTCCTTCCTTAATTTTTGGTCAG	natural antisense	NM_005197	FOXN3	forkhead box protein N3 isoform 2	-	89622515	89883454
ASHG19A3A051682	118.151	85.7562	6.80677	6.49445	noncoding	ENST00000500463	AL138478.1	Ensembl	3509	chr14	+	89622525	89627743		CGGCTGTTAAAAGATGGATCGTTTTAAAAACTGTGTTTTCCTTCCTTAATTTTTGGTCAG	natural antisense	NM_001085471	FOXN3	forkhead box protein N3 isoform 1	-	89622515	90085494
ASHG19A3A035292	181.334	148.33	7.41748	7.2958	noncoding	G30724		misc_RNA	296	chr7	+	149279465	149279761		AAGTCTGCCTTTTTATGACTCCTTGTACATTTGAAGGCCAGCTTTCCCCTAAAGCCATCC	intergenic
ASHG19A3A049011	86.0389	87.8719	6.34681	6.52814	noncoding	ENST00000500685	AC007622.1	Ensembl	1680	chr12	+	108130365	108153745		AAGTATTACACCGTGAAGAAAACAACTGCTGGCATCCCCAAGACACACAGGCACACATAT	natural antisense	NM_012406	PRDM4	PR domain zinc finger protein 4	-	108126642	108154914
ASHG19A3A053634	762.091	441.32	9.4859	8.88274	noncoding	uc010vds.1	IMAA	UCSC_knowngene	1587	chr16	-	29564406	29606709	uc002dja.2,NR_027155,NR_027154,NR_002473,NR_002453,NM_015092,ENST00000309865,	TATTAGTTGGATGGCATAGAGATCATACTCAGAAACCTTCGCTCACGCAGCAGGTATCTG	intergenic
ASHG19A3A022657	3040.63	3164.9	11.4848	11.7001	noncoding	AF088021		misc_RNA	579	chr3	+	51698596	51699165		GGTTTTATCTTAAAAGAACACACCAGTCATTCTGGGTCTCCCCTTATTGCCATTGCCAGG	intergenic
ASHG19A3A048199	522.441	441.575	8.93493	8.88368	noncoding	CR625009		misc_RNA	1471	chr12	-	133681529	133682999		GCTCATATTTGGTATAATTATGTCTTTTCTGGGACCTATTTGAGGGTGGAATGTGGGAGG	natural antisense	NM_003440	ZNF140	zinc finger protein 140	+	133657036	133684258
ASHG19A3A010912	11495.2	12256	13.4161	13.6535	noncoding	NR_027064	PLAC2	RefSeq_NR	3693	chr19	-	5558179	5568005		CAGCTTGGAACTAGATACAGAAATGCTGTTTTGAGAGTGTACTGAATAAAAGATTACATG	intergenic
ASHG19A3A015287	188.632	199.172	7.47468	7.72184	noncoding	BX538340		misc_RNA	3287	chr2	+	9246721	9249987		TAAAATGTGATCTATTAGCACAGCTAGGGACGTAGGACTATGCCTGTAATAGCAAAAGTA	intergenic
ASHG19A3A012293	237.283	254.631	7.80525	8.07667	noncoding	ENST00000435973	RP11-286M16.1	Ensembl	385	chr1	-	230011296	230021499		TAAGAAGAATAACTCCCATTCCTCATGCATGAGACCCTCTGCTAAATGCTTCCTGTGCAC	intergenic
ASHG19A3A054987	735.375	538.707	9.43161	9.17193	noncoding	NR_028502	C17orf91	RefSeq_NR	2659	chr17	-	1614798	1619566		TAACTGCTGCTACTCTGTTTCTTTCCTCACTTTGCTTTCCAAGGTGGTATGTGATCCCCA	bidirectional	NM_152348	WDR81	WD repeat-containing protein 81 isoform 2	+	1619816	1641893
ASHG19A3A054987	735.375	538.707	9.43161	9.17193	noncoding	NR_028502	C17orf91	RefSeq_NR	2659	chr17	-	1614798	1619566		TAACTGCTGCTACTCTGTTTCTTTCCTCACTTTGCTTTCCAAGGTGGTATGTGATCCCCA	bidirectional	NM_001163673	WDR81	WD repeat-containing protein 81 isoform 3	+	1619816	1641893
ASHG19A3A017962	79.4026	70.6482	6.23164	6.22132	noncoding	AK126932		misc_RNA	3658	chr20	+	1301353	1305011		AACATTTAACCAGTAGAGCACTTATATTTTTGTCAGCTGTCCCCTGGGAGAGCAGGGAGT	intronic antisense	NM_080489	SDCBP2	syntenin-2 isoform a	-	1290554	1309879
ASHG19A3A017962	79.4026	70.6482	6.23164	6.22132	noncoding	AK126932		misc_RNA	3658	chr20	+	1301353	1305011		AACATTTAACCAGTAGAGCACTTATATTTTTGTCAGCTGTCCCCTGGGAGAGCAGGGAGT	intronic antisense	NM_001199784	SDCBP2	syntenin-2 isoform a	-	1290554	1306513
ASHG19A3A049628	143.326	106.381	7.07764	6.81136	noncoding	ENST00000439454	RP11-527N12.1	Ensembl	348	chr13	-	63757233	63801189		GCCTTTGCTACTCCTTGCTGACATTTGGAATTTAACTGAAGTGTCTTGTTAAAAAACATT	intergenic
ASHG19A3L0000199	82.2675	93.7976	6.28461	6.6242	noncoding	BX501243	lincRNA-HABP2-1	lincRNA	591	chr10	+	115148152	115149054		CTTTCTTTTTTGACAATTATCTTATTGTCTTTGTGAAGCGATTCGTGCCTCCTGTGAACA	intergenic
ASHG19A3A021424	118.235	105.985	6.80755	6.80471	noncoding	AK124267		misc_RNA	2069	chr3	-	112926241	112928309		AATGTAACAGTCCCTACCAGCACCATTTAGTCAGGAGAATGACACACTGCCTTGTTCCTT	intergenic
ASHG19A3A011489	1088.24	1152.06	10.002	10.2582	noncoding	D55638		RNAdb	732	chr19	-	42057937	42058639		GGATTGTCTTTATTTCCCCTGAAGCTTCCCCTCCTGAAGAAAAAAGTTCTCAAACACCCT	intergenic
ASHG19A3A053071	1936.01	1546.29	10.83	10.6748	noncoding	uc002aya.2	BC014373	UCSC_knowngene	1293	chr15	+	74753605	74773603		GGACCATGATAAAATTCCAGACTCTCGGTAGTTTTTGCGTTCCAAGAAGTAGAGCCTAGA	bidirectional	NM_201265	UBL7	ubiquitin-like protein 7	-	74738317	74753529
ASHG19A3A053071	1936.01	1546.29	10.83	10.6748	noncoding	uc002aya.2	BC014373	UCSC_knowngene	1293	chr15	+	74753605	74773603		GGACCATGATAAAATTCCAGACTCTCGGTAGTTTTTGCGTTCCAAGAAGTAGAGCCTAGA	bidirectional	NM_032907	UBL7	ubiquitin-like protein 7	-	74738317	74753510
ASHG19A3A038309	1909.87	1597.21	10.812	10.7264	noncoding	uc003zhu.2	BC069756	UCSC_knowngene	1364	chr9	+	3479873	3481237		TCAACCTAGCTAGGCTCCATTCTCCTCCCTATTAATAAAATTATAACCATCATCAATTAC	intronic antisense	NM_134428	RFX3	transcription factor RFX3 isoform b	-	3224646	3525983
ASHG19A3A038309	1909.87	1597.21	10.812	10.7264	noncoding	uc003zhu.2	BC069756	UCSC_knowngene	1364	chr9	+	3479873	3481237		TCAACCTAGCTAGGCTCCATTCTCCTCCCTATTAATAAAATTATAACCATCATCAATTAC	intronic antisense	NM_002919	RFX3	transcription factor RFX3 isoform a	-	3247036	3525983
ASHG19A3A020318	4664.58	6546.46	12.114	12.7557	noncoding	ENST00000432130	RP1-56J10.8	Ensembl	249	chr22	+	30994295	31002674		GGCCTGGCTGGTCTGGGGCCAGCGGCACCCACCCTCCCCTCAATTGCCCAACTCCCCCCC	intergenic
ASHG19A3L0002225	4990.64	9967.34	12.204	13.3566	noncoding	BC036853	lincRNA-PDCD1LG2-2	lincRNA	1660	chr9	-	5357968	5630071	NM_018465,	GGAGGTGCTCTAAATAACTTTTAGATTTCCTCTCTCTGTGTGCATTACCAATATCTAAGT	exon sense-overlapping	NM_018465	C9orf46	transmembrane protein C9orf46	-	5357966	5437937
ASHG19A3L0002225	4990.64	9967.34	12.204	13.3566	noncoding	BC036853	lincRNA-PDCD1LG2-2	lincRNA	1660	chr9	-	5357968	5630071	NM_018465,	GGAGGTGCTCTAAATAACTTTTAGATTTCCTCTCTCTGTGTGCATTACCAATATCTAAGT	intronic antisense	NM_025239	PDCD1LG2	programmed cell death 1 ligand 2 precursor	+	5510544	5571282
ASHG19A3L0002225	4990.64	9967.34	12.204	13.3566	noncoding	BC036853	lincRNA-PDCD1LG2-2	lincRNA	1660	chr9	-	5357968	5630071	NM_018465,	GGAGGTGCTCTAAATAACTTTTAGATTTCCTCTCTCTGTGTGCATTACCAATATCTAAGT	intronic antisense	NM_001135920	KIAA1432	protein RIC1 homolog isoform b	+	5629118	5769454
ASHG19A3L0002225	4990.64	9967.34	12.204	13.3566	noncoding	BC036853	lincRNA-PDCD1LG2-2	lincRNA	1660	chr9	-	5357968	5630071	NM_018465,	GGAGGTGCTCTAAATAACTTTTAGATTTCCTCTCTCTGTGTGCATTACCAATATCTAAGT	intronic antisense	NM_001206557	KIAA1432	protein RIC1 homolog isoform c	+	5629118	5776556
ASHG19A3L0002225	4990.64	9967.34	12.204	13.3566	noncoding	BC036853	lincRNA-PDCD1LG2-2	lincRNA	1660	chr9	-	5357968	5630071	NM_018465,	GGAGGTGCTCTAAATAACTTTTAGATTTCCTCTCTCTGTGTGCATTACCAATATCTAAGT	intronic antisense	NM_020829	KIAA1432	protein RIC1 homolog isoform a	+	5629118	5776556
ASHG19A3L0002225	4990.64	9967.34	12.204	13.3566	noncoding	BC036853	lincRNA-PDCD1LG2-2	lincRNA	1660	chr9	-	5357968	5630071	NM_018465,	GGAGGTGCTCTAAATAACTTTTAGATTTCCTCTCTCTGTGTGCATTACCAATATCTAAGT	intronic antisense	NM_014143	CD274	programmed cell death 1 ligand 1 precursor	+	5450502	5470567
ASHG19A3A044659	3448.12	2869.47	11.6781	11.5695	noncoding	ENST00000417351	CTAGE7	Ensembl	2823	chr10	+	131904272	131907095		CTGGCAATATTTTTGCTCTCTTCAAAAGTAATTCTGACTGATCTCATTTCAAGTAACTGC	intergenic
ASHG19A3A007744	192.033	286.494	7.50114	8.24946	noncoding	NR_033233	MOCS1	RefSeq_NR	3969	chr6	-	39872034	39902290		GGCAGGAAGAAGCGGCAGCATGCAGAGTTATTTTTGATGTTCCCCAATTCCCCACCAGCC	natural antisense	NM_001201427	DAAM2	disheveled-associated activator of morphogenesis	+	39760158	39872653
ASHG19A3A007744	192.033	286.494	7.50114	8.24946	noncoding	NR_033233	MOCS1	RefSeq_NR	3969	chr6	-	39872034	39902290		GGCAGGAAGAAGCGGCAGCATGCAGAGTTATTTTTGATGTTCCCCAATTCCCCACCAGCC	natural antisense	NM_015345	DAAM2	disheveled-associated activator of morphogenesis	+	39760772	39872653
ASHG19A3A007744	192.033	286.494	7.50114	8.24946	noncoding	NR_033233	MOCS1	RefSeq_NR	3969	chr6	-	39872034	39902290		GGCAGGAAGAAGCGGCAGCATGCAGAGTTATTTTTGATGTTCCCCAATTCCCCACCAGCC	exon sense-overlapping	NM_001075098	MOCS1	molybdenum cofactor biosynthesis protein 1	-	39872033	39902290
ASHG19A3A007744	192.033	286.494	7.50114	8.24946	noncoding	NR_033233	MOCS1	RefSeq_NR	3969	chr6	-	39872034	39902290		GGCAGGAAGAAGCGGCAGCATGCAGAGTTATTTTTGATGTTCCCCAATTCCCCACCAGCC	exon sense-overlapping	NM_005943	MOCS1	molybdenum cofactor biosynthesis protein 1	-	39872033	39895455
ASHG19A3A035078	5628.94	6975.94	12.376	12.845	noncoding	HIT000338917		H-invDB	649	chr7	+	130147498	130148146		CAAAACCAACCCCCTCCCCAAATCATTTTAAATAAAACTGATCTCAATGAAAATCATGTC	natural antisense	NM_012133	COPG2	coatomer subunit gamma-2	-	130146079	130353598
ASHG19A3A026163	394.449	217.556	8.53333	7.85152	noncoding	BC034819		NRED	2882	chr4	+	153457444	153460292	uc003imv.2,	GTGGCTTTTACTGTCAAAGATTGTGTAAGCTAAATTATCTGGCAAAATTTTGCTTTCCAG	intergenic
ASHG19A3A048687	392.131	423.819	8.52439	8.82139	noncoding	ENST00000452388	OR6C5P	Ensembl	923	chr12	+	55705618	55706541		CAAAGGAGTAGCTATTCTGAACACTTCAATTGCCCCCATGCTGAACCCTTCTATTTACAC	intergenic
ASHG19A3A041539	225.833	382.155	7.73423	8.66973	noncoding	ENST00000441399	RP5-842K24.2	Ensembl	3474	chrX	+	131352534	131566890		TATTCTCCTTGCTGGTATTTCTTCCACTTGCTATTTTGCTGAGAGATGCATGCAAACTAC	bidirectional	NM_021183	RAP2C	ras-related protein Rap-2c precursor	-	131337052	131352189
ASHG19A3A041539	225.833	382.155	7.73423	8.66973	noncoding	ENST00000441399	RP5-842K24.2	Ensembl	3474	chrX	+	131352534	131566890		TATTCTCCTTGCTGGTATTTCTTCCACTTGCTATTTTGCTGAGAGATGCATGCAAACTAC	intronic antisense	NM_001170701	MBNL3	muscleblind-like protein 3 isoform 3	-	131503342	131547603
ASHG19A3A041539	225.833	382.155	7.73423	8.66973	noncoding	ENST00000441399	RP5-842K24.2	Ensembl	3474	chrX	+	131352534	131566890		TATTCTCCTTGCTGGTATTTCTTCCACTTGCTATTTTGCTGAGAGATGCATGCAAACTAC	intronic antisense	NM_001170703	MBNL3	muscleblind-like protein 3 isoform 5	-	131503342	131547636
ASHG19A3A041539	225.833	382.155	7.73423	8.66973	noncoding	ENST00000441399	RP5-842K24.2	Ensembl	3474	chrX	+	131352534	131566890		TATTCTCCTTGCTGGTATTTCTTCCACTTGCTATTTTGCTGAGAGATGCATGCAAACTAC	intronic antisense	NM_133486	MBNL3	muscleblind-like protein 3 isoform 2	-	131503342	131573718
ASHG19A3A041539	225.833	382.155	7.73423	8.66973	noncoding	ENST00000441399	RP5-842K24.2	Ensembl	3474	chrX	+	131352534	131566890		TATTCTCCTTGCTGGTATTTCTTCCACTTGCTATTTTGCTGAGAGATGCATGCAAACTAC	intronic antisense	NM_018388	MBNL3	muscleblind-like protein 3 isoform 1	-	131503342	131573718
ASHG19A3A041539	225.833	382.155	7.73423	8.66973	noncoding	ENST00000441399	RP5-842K24.2	Ensembl	3474	chrX	+	131352534	131566890		TATTCTCCTTGCTGGTATTTCTTCCACTTGCTATTTTGCTGAGAGATGCATGCAAACTAC	intronic antisense	NM_001170702	MBNL3	muscleblind-like protein 3 isoform 4	-	131503342	131547603
ASHG19A3A041539	225.833	382.155	7.73423	8.66973	noncoding	ENST00000441399	RP5-842K24.2	Ensembl	3474	chrX	+	131352534	131566890		TATTCTCCTTGCTGGTATTTCTTCCACTTGCTATTTTGCTGAGAGATGCATGCAAACTAC	intronic antisense	NM_001170704	MBNL3	muscleblind-like protein 3 isoform 5	-	131503342	131623996
ASHG19A3A016139	91.5019	118.219	6.44127	6.96679	noncoding	ENST00000427208	AC019100.5	Ensembl	1875	chr2	+	108938693	108970255		ATATTGAGAAAAGCAGGCGCGCTTCCATTCAACTTCAACACCCTTTCCTGGAGTGGATAA	intergenic
ASHG19A3H0000061	18382.4	22217.2	14.098	14.5099	noncoding	nc-HOXB9-184-	nc-HOXB9-184	HOX cluster	198	chr17	-	46703989	46704187		CCCTTGCTCTCCCTCCCTCCCCGACCCGCCTGGGGAGAGGGCTCTACAGCCTGCGTCCCT	intergenic
ASHG19A3A046484	538.556	629.982	8.97901	9.38889	noncoding	uc001nry.2	BC040894	UCSC_knowngene	2344	chr11	+	61355965	61375017		ACCTTCAACCCCTGAGCTTTCCTGCCTTCGAGTCCTCGGAGCTCTCCTGGAGGCTGAGCA	intergenic
ASHG19A3L0002292	119.946	242.879	6.82708	8.00627	noncoding	chrX:38863681-38944131-	lincRNA-MID1IP1-2	lincRNA	80451	chrX	-	38863681	38944131		TTAATTAGGTGCCTAACCTTGATTGCAGGGAGTCAGGATATCTCTCCAACTCCACCTTCT	intergenic
ASHG19A3A049051	409.032	110.443	8.58228	6.86503	noncoding	ENST00000424240	ADAM1	Ensembl	2129	chr12	+	112337066	112339195		ACGTGTAATGGGAAGGGAGTTTGTAATGATTTAGGGCACTGCCACTGTAATGAAGGGCAT	intergenic
ASHG19A3A031789	88.8219	85.057	6.3949	6.48375	noncoding	ENST00000402742	RP11-30P6.1	Ensembl	1590	chr6	+	85995793	86000567		TTAATTAAGTGCAGTTCAAGCTGCCAGGAAGCTTTTATCCAGTGATCGAAATCCACCAAT	intergenic
ASHG19A3A044502	1358.06	929.559	10.3201	9.94319	noncoding	uc001laa.2	AL050000	UCSC_knowngene	4228	chr10	+	114583254	114587482		GGAAATGTGGCTCTACATATCGTTAGTACAAGTAATACATTTTGATTGTTGTTTCCTGGA	intergenic
ASHG19A3A040151	4766.69	3322.79	12.1453	11.7723	noncoding	ENST00000456632	RP11-236M5.1	Ensembl	1027	chrX	-	92542731	92543758		TCAACCTAGGGCACAGAAAATTGCAGAACATCGGAGAAAGTATGGGTGAAAAAGTGAAGA	intergenic
ASHG19A3A033960	87780.6	75954.9	16.4396	16.2152	noncoding	ENST00000434621	GAPDHL13	Ensembl	1008	chr7	+	9654607	9655615		CATTTCCTGATATGACAATGAATTTGGCTACAGCAACAGGGTGGTGAACCTCATGACCCA	intergenic
ASHG19A3A026458	27708.5	36738.8	14.694	15.2161	noncoding	ENST00000412047	RP4-581O6.1	Ensembl	152	chr1	+	100308165	100308317	ENST00000495111,	TGGTAATAAAATCAGGTAGAACTCCAAAAGGAGACATTGGAGAAGAATCAAGCTGGGTCT	intergenic
ASHG19A3A016173	30767	36329.1	14.8543	15.1968	noncoding	ENST00000401483	AC114776.1	Ensembl	387	chr2	+	111391523	111391910		TACAAATTACGTTCCTTCCAAATTAACCAGGACGAAGAAGAGGAGGAAGACGAGGATTAA	intergenic
ASHG19A3A036744	83.2629	126.204	6.30101	7.06394	noncoding	ENST00000509499	RP11-69I13.1	Ensembl	856	chr8	+	89497338	89498323		CCCAGTGCCTAATGAAAATAGATACATTCCTGATTGGGTACCAGTATAGAAAAACAACAA	intergenic
ASHG19A3A007350	3015.69	3102.26	11.4703	11.6728	noncoding	NR_024588	KIAA0652	RefSeq_NR	4680	chr11	+	46638825	46696367	NM_001142673,	TTTTTCCACCTCCCCACCATCCCAGCTCTCAAGCTCTCGCCTTTCCTATCAGCCTGCTGC	exon sense-overlapping	NM_001205121	ATG13	autophagy-related protein 13 isoform 2	+	46638825	46697568
ASHG19A3A007350	3015.69	3102.26	11.4703	11.6728	noncoding	NR_024588	KIAA0652	RefSeq_NR	4680	chr11	+	46638825	46696367	NM_001142673,	TTTTTCCACCTCCCCACCATCCCAGCTCTCAAGCTCTCGCCTTTCCTATCAGCCTGCTGC	exon sense-overlapping	NM_001205119	ATG13	autophagy-related protein 13 isoform 3	+	46638825	46697568
ASHG19A3A007350	3015.69	3102.26	11.4703	11.6728	noncoding	NR_024588	KIAA0652	RefSeq_NR	4680	chr11	+	46638825	46696367	NM_001142673,	TTTTTCCACCTCCCCACCATCCCAGCTCTCAAGCTCTCGCCTTTCCTATCAGCCTGCTGC	bidirectional	NM_173811	HARBI1	putative nuclease HARBI1	-	46624855	46638777
ASHG19A3A007350	3015.69	3102.26	11.4703	11.6728	noncoding	NR_024588	KIAA0652	RefSeq_NR	4680	chr11	+	46638825	46696367	NM_001142673,	TTTTTCCACCTCCCCACCATCCCAGCTCTCAAGCTCTCGCCTTTCCTATCAGCCTGCTGC	exon sense-overlapping	NM_001205120	ATG13	autophagy-related protein 13 isoform 1	+	46638825	46697568
ASHG19A3A007350	3015.69	3102.26	11.4703	11.6728	noncoding	NR_024588	KIAA0652	RefSeq_NR	4680	chr11	+	46638825	46696367	NM_001142673,	TTTTTCCACCTCCCCACCATCCCAGCTCTCAAGCTCTCGCCTTTCCTATCAGCCTGCTGC	exon sense-overlapping	NM_014741	ATG13	autophagy-related protein 13 isoform 2	+	46638825	46697568
ASHG19A3A007350	3015.69	3102.26	11.4703	11.6728	noncoding	NR_024588	KIAA0652	RefSeq_NR	4680	chr11	+	46638825	46696367	NM_001142673,	TTTTTCCACCTCCCCACCATCCCAGCTCTCAAGCTCTCGCCTTTCCTATCAGCCTGCTGC	exon sense-overlapping	NM_001205122	ATG13	autophagy-related protein 13 isoform 4	+	46638825	46697568
ASHG19A3A007350	3015.69	3102.26	11.4703	11.6728	noncoding	NR_024588	KIAA0652	RefSeq_NR	4680	chr11	+	46638825	46696367	NM_001142673,	TTTTTCCACCTCCCCACCATCCCAGCTCTCAAGCTCTCGCCTTTCCTATCAGCCTGCTGC	exon sense-overlapping	NM_001142673	ATG13	autophagy-related protein 13 isoform 1	+	46638825	46697568
ASHG19A3A018801	90731.5	91472	16.4939	16.4589	noncoding	ENST00000444036	AP000281.1	Ensembl	316	chr21	-	34213805	34214121		AGACTTCACCAAGTTCAATGCAGATGAATTTGAAGACATGGTGGCTGAGAAGCGGCTCAT	intergenic
ASHG19A3A029377	4783.27	4082.46	12.1484	12.069	noncoding	G36445		misc_RNA	2584	chr6	-	7155256	7157840		GAAAATATTCTTCTAGTGCGACTGAACTATCTCCCTCTGAGAAACCACTTCCCACTAGGC	intronic antisense	NM_001003699	RREB1	ras-responsive element-binding protein 1 isoform	+	7108085	7252213
ASHG19A3A029377	4783.27	4082.46	12.1484	12.069	noncoding	G36445		misc_RNA	2584	chr6	-	7155256	7157840		GAAAATATTCTTCTAGTGCGACTGAACTATCTCCCTCTGAGAAACCACTTCCCACTAGGC	intronic antisense	NM_001003698	RREB1	ras-responsive element-binding protein 1 isoform	+	7108085	7252213
ASHG19A3A029377	4783.27	4082.46	12.1484	12.069	noncoding	G36445		misc_RNA	2584	chr6	-	7155256	7157840		GAAAATATTCTTCTAGTGCGACTGAACTATCTCCCTCTGAGAAACCACTTCCCACTAGGC	intronic antisense	NM_001003700	RREB1	ras-responsive element-binding protein 1 isoform	+	7108085	7252213
ASHG19A3A029377	4783.27	4082.46	12.1484	12.069	noncoding	G36445		misc_RNA	2584	chr6	-	7155256	7157840		GAAAATATTCTTCTAGTGCGACTGAACTATCTCCCTCTGAGAAACCACTTCCCACTAGGC	intronic antisense	NM_001168344	RREB1	ras-responsive element-binding protein 1 isoform	+	7107829	7252213
ASHG19A3A008281	347.572	385.292	8.34837	8.68166	noncoding	ENST00000426038	RP11-357J22.2	Ensembl	703	chr1	-	176336834	176337537		TTTTTCAACTTCATATAGTGCCAACAATTATGAGTGTGGTTCCTCCTGAGTATCATCATT	intergenic
ASHG19A3A030715	4093.49	4053.8	11.9205	12.0604	noncoding	ENST00000405959	RP1-101K10.4	Ensembl	362	chr6	-	153280411	153280773		CAAAAGAGGACAAAAGTCCCCCAGGACATAGAAATGAAGGACCTTGAAGATGAGAGCTAA	intergenic
ASHG19A3A016318	1244.12	1557.49	10.1943	10.6872	noncoding	ENST00000423267	AC012306.2	Ensembl	114	chr2	+	128688900	128689014		TTAACCCAAGAGACACCTGGAATTTTGTGTTTGGACAGGCTTCTTTGACAGATGGTGTGG	intergenic
ASHG19A3A008475	2776	1526.22	11.3516	10.6568	noncoding	uc010wkl.1	DQ589083	UCSC_knowngene	1661	chr17	-	45126240	45127901	NR_027418,BC065911,	AACTCTGCTTAGGATTATTTCATTGATCCCCAGGGTCCAATTGCCCAGTGCTCAGTCAAA	intergenic
ASHG19A3A026492	148.746	142.344	7.1349	7.23373	noncoding	NR_028351	FLJ33360	RefSeq_NR	2419	chr5	-	6310553	6337405		AGTCATTGACTTTCTTTGTTGTTACTTTCAGCATATCCCCTGTCTGGCACAAAGGGAGCA	intergenic
ASHG19A3A012470	120.884	123.809	6.83787	7.03574	noncoding	ENST00000499403	AC073544.1	Ensembl	1178	chr19	+	23928159	23937704		TCCTATGTCTCTTTCTAGTCCAAGGCTCTTTTTCTTGTTCCAGACAGGTGATCAGGTCTG	natural antisense	NM_138286	ZNF681	zinc finger protein 681	-	23921996	23941693
ASHG19A3A051348	531.684	577.246	8.96017	9.26603	noncoding	ENST00000475149	RP11-114O13.1	Ensembl	392	chr14	+	31260303	31260695		ATAGATATGGCATCGATCTTTAGCCTGAGAACTCTCCAGAAATGTTAACGAGATCCTGGG	intergenic
ASHG19A3A011827	75.7308	117.076	6.16339	6.95089	noncoding	BC020462		misc_RNA	715	chr19	-	54705040	54711515		TCGATGTGCTTCTGGGAATCCAGGCGGACAATGAAGGACGGGATGTTCACCACCTGCTTG	natural antisense	NM_001013	RPS9	40S ribosomal protein S9	+	54704725	54711515
ASHG19A3A030874	845.973	927.624	9.63286	9.94036	noncoding	G36936		misc_RNA	458	chr6	+	996540	996998		AAATGAAACTATAACTTTGAGACACTCCCTAGTCCCCCATTGTGAGCAGGTGCACCCAAT	intergenic
ASHG19A3A024508	449.947	615.537	8.72258	9.35452	noncoding	ENST00000507207	RP11-1299A16.1	Ensembl	168	chr4	-	99634954	99635122		AAGAAGGGTATAGAGCCTGGGATGTCTGAACCAATCGTTTTGAGCCTGCTTTGGAGATAA	intergenic
ASHG19A3A028120	83288.9	84060.5	16.3503	16.3536	noncoding	ENST00000477670	CTD-2284O10.1	Ensembl	797	chr5	+	37085157	37085954	NM_001007,	ATTTCTCTTCCCCGAGGAAAGGGTATCTGCCTCACTATTGCTGAAGAGAGAGACAAAAGA	intergenic
ASHG19A3A008492	146.303	107.027	7.10912	6.82078	noncoding	ENST00000451140	AC003665.1	Ensembl	1039	chr17	-	45975825	46018776		CCAAGCCAATACTAAGGTCTACTGGTTGGCTGCAACAAGTTTAAAATGTCTTCATAAGGG	bidirectional	NM_018129	PNPO	pyridoxine-5'-phosphate oxidase	+	46018888	46026674
ASHG19A3A008492	146.303	107.027	7.10912	6.82078	noncoding	ENST00000451140	AC003665.1	Ensembl	1039	chr17	-	45975825	46018776		CCAAGCCAATACTAAGGTCTACTGGTTGGCTGCAACAAGTTTAAAATGTCTTCATAAGGG	intronic antisense	NM_003110	SP2	transcription factor Sp2	+	45973515	46006323
ASHG19A3L0000752	347.933	385.042	8.35029	8.68104	noncoding	chr14:66457497-66472547+	lincRNA-GPHN-4	lincRNA	15051	chr14	+	66457497	66472547		GTAGAAAAGATTTGCTCATCCCAAGTCAAGATGTTCTCCCATGTTTTTTCTTAGCAGCTT	intergenic
ASHG19A3A047739	1007.57	760.998	9.89343	9.66196	noncoding	AF318328		misc_RNA	1179	chr12	-	58211996	58213155		TTTCACCTATCCCTAGAGAAAGATGGTATGGAGCAAGGCAGGAGGAGTTAAAACCAGCTT	intergenic
ASHG19A3A033794	144.939	135.688	7.09481	7.16536	noncoding	G30861		misc_RNA	277	chr7	-	154721353	154721630		TTCTGTCTATATTATTCCTGCCTGGATGACATAGTGAGGTCTTCACTGCTGGAGAAGGGA	intergenic
ASHG19A3L0000937	1861.69	2167.77	10.7734	11.1741	noncoding	exon1959+	lincRNA-RBBP8-2	lincRNA	93	chr18	+	20043793	20043885		AAGATGTCAAGGACACACACCAAGCCCATCTTGTTCAAAACCTAATGAGCTCCCCTCCCT
ASHG19A3A024990	1193.4	2202.02	10.1369	11.1963	noncoding	ENST00000513791	RP11-485C11.1	Ensembl	460	chr4	-	173301178	173301638		ATCCATTAGCAAATGATGCAGAGGAGCAGTGGAAACACCAACGAAGCCCAAGCCATATAA	intronic antisense	NM_001034845	GALNTL6	polypeptide	+	172734574	173961558
ASHG19A3A055217	1178.51	1215.49	10.1215	10.3343	noncoding	uc003njq.2	FKSG62	UCSC_knowngene	588	chr6	+	27793689	27794715	uc011dtd.1,NM_145280,NM_001127395,	CCTCCCAGACGGGGCCGTGGCCGGGCAGAGGGGCTCCTCACTTCCCAGTAGGGGCGGCCG	intergenic
ASHG19A3A035243	199.155	201.662	7.55112	7.74068	noncoding	ENST00000291129	AC099548.6	Ensembl	2421	chr7	+	143497824	143515066	NM_173678,NM_001130026,NM_001130025,	AACTTGGAAAAGAGCTGTCTGGCAAAGTTGAGAGTTGATGGTGCAGCCTTCCTACAGATT	intergenic
ASHG19A3A037858	696.218	603.063	9.35465	9.32661	noncoding	ENST00000415694	RP11-417L14.1	Ensembl	1580	chr9	-	109931849	109933429		AGCTTAATTAAGTATTTCTCTGTAGAGGAAGAGGAAGATGAAAACATGGTGCCAGAAACT	intergenic
ASHG19A3A014203	969.562	1053.86	9.83284	10.123	noncoding	NR_015395	LOC541471	RefSeq_NR	809	chr2	-	112124590	112252692		TTATAAATCTTCAATACATCCTGTCCCCCTAAAACGGCATCTGGGTCTTTTGAGGGTTAA	intergenic
ASHG19A3A050736	99.5087	121.796	6.56757	7.01062	noncoding	ENST00000446249	RP11-439A17.4	Ensembl	664	chr1	-	120876262	120905153	ENST00000435113,	TCAGGCTTTTCATTATTATAGGAAGCATCTGGCCAAGGACCACCAACATCTTCCTGTCCT	intergenic
ASHG19A3L0002896	127.386	154.402	6.91353	7.35467	noncoding	chr2:105731762-105737443+	lincRNA-GPR45	lincRNA	5682	chr2	+	105731762	105737443		GGACAAACTTGTTTATTTGTTGACTCAATCATTCACACATTCTCCAGCCATTTACTCTTT	intergenic
ASHG19A3A031526	106.85	112.67	6.66787	6.89556	noncoding	BC019949		misc_RNA	2413	chr1	-	24073204	24075608		TTGCAAGGTACATGTTGAGGCATCTCAGTTGTCCCCTGTACAATCCTTCAACCCAAAAAA	natural antisense	NM_003198	TCEB3	transcription elongation factor B polypeptide 3	+	24069855	24088549
ASHG19A3A008205	89.3247	95.6404	6.40513	6.65175	noncoding	uc010ctx.1	AK125932	UCSC_knowngene	4399	chr17	-	34220710	34236953		TAAATACCCCTGGAAATGATGAACTTCCGCCAAATCTATCAAGAGCCCATGACTCCATCT	intergenic
ASHG19A3A039624	96.7145	90.939	6.52531	6.57672	noncoding	ENST00000416056	RP11-565J7.1	Ensembl	388	chr1	+	212109590	212109978		GATGGGTAAGCCTGTGTTTACAGATCCTTCCATAAAGACAAAATCTGGATATCATATTAT	intergenic
ASHG19A3A035844	467.546	396.885	8.77514	8.72382	noncoding	ENST00000489168	RP11-159C14.1	Ensembl	390	chr8	-	69437751	69438141		TATCATCCTGTTTCTCACTGTGATGAAGCATGGCTACACTGGTGAATCTAAAATCATTGA	intronic antisense	NM_001195639	C8orf34	hypothetical protein LOC116328 isoform 2	+	69242956	69448062
ASHG19A3A035844	467.546	396.885	8.77514	8.72382	noncoding	ENST00000489168	RP11-159C14.1	Ensembl	390	chr8	-	69437751	69438141		TATCATCCTGTTTCTCACTGTGATGAAGCATGGCTACACTGGTGAATCTAAAATCATTGA	intronic antisense	NM_052958	C8orf34	hypothetical protein LOC116328 isoform 1	+	69242956	69731258
ASHG19A3A055306	191.474	136.903	7.49686	7.17886	noncoding	uc010ury.1	DKFZp434I1020	UCSC_knowngene	3075	chr15	-	100330989	100347132		GCTGCGGCTCCTGGTTCTTGTGGAAGGACAGCAAGGCTGAGGAGAATGGCTCCCACAGCT	intergenic
ASHG19A3A030527	750.424	519.077	9.46083	9.1143	noncoding	ENST00000401879	RP5-988G15.1	Ensembl	645	chr6	-	132101807	132102452		GCCGTTACCGCGAATACAAGTAAAGTTTGTACAATTCATACCTAATAAACAATTTAGGAC	intergenic
ASHG19A3A019319	1503.02	1813.66	10.467	10.916	noncoding	ENST00000436359	AP001048.4	Ensembl	280	chr21	+	44885188	44887178		GGACATCAGGCTGGCAGATTGGAGCACACCCCTTCTTTCTAACCCCTCTTGAAAGCTTCC	intergenic
ASHG19A3A026383	310.944	334.511	8.19445	8.47404	noncoding	uc003ixr.2	CR595267	UCSC_knowngene	1013	chr4	+	186346920	186348033		ACCTCTCCTGACGCTCCATCCGTACCTTTTGCAAGGGAACGTGCCATAATTCGGCTATGC	natural antisense	NM_018359	UFSP2	ufm1-specific protease 2	-	186320693	186347139
ASHG19A3A007318	171.404	194.898	7.33757	7.68794	noncoding	NR_024503	ASFMR1	RefSeq_NR	2380	chrX	-	146990948	147003676		GGCCAGAACGCCCATTTCTGCAGAGCTGCCTTAATCCATGTTCCCTTCGGGATGCTGGTA	natural antisense	NM_001185075	FMR1	fragile X mental retardation 1 protein isoform	+	146993468	147032647
ASHG19A3A007318	171.404	194.898	7.33757	7.68794	noncoding	NR_024503	ASFMR1	RefSeq_NR	2380	chrX	-	146990948	147003676		GGCCAGAACGCCCATTTCTGCAGAGCTGCCTTAATCCATGTTCCCTTCGGGATGCTGGTA	natural antisense	NM_002024	FMR1	fragile X mental retardation 1 protein isoform	+	146993468	147032647
ASHG19A3A007318	171.404	194.898	7.33757	7.68794	noncoding	NR_024503	ASFMR1	RefSeq_NR	2380	chrX	-	146990948	147003676		GGCCAGAACGCCCATTTCTGCAGAGCTGCCTTAATCCATGTTCCCTTCGGGATGCTGGTA	natural antisense	NM_001185076	FMR1	fragile X mental retardation 1 protein isoform	+	146993468	147032647
ASHG19A3A007318	171.404	194.898	7.33757	7.68794	noncoding	NR_024503	ASFMR1	RefSeq_NR	2380	chrX	-	146990948	147003676		GGCCAGAACGCCCATTTCTGCAGAGCTGCCTTAATCCATGTTCCCTTCGGGATGCTGGTA	natural antisense	NM_001185082	FMR1	fragile X mental retardation 1 protein isoform	+	146993468	147032647
ASHG19A3A007318	171.404	194.898	7.33757	7.68794	noncoding	NR_024503	ASFMR1	RefSeq_NR	2380	chrX	-	146990948	147003676		GGCCAGAACGCCCATTTCTGCAGAGCTGCCTTAATCCATGTTCCCTTCGGGATGCTGGTA	natural antisense	NM_001185081	FMR1	fragile X mental retardation 1 protein isoform	+	146993468	147032647
ASHG19A3A028444	5223.2	5798.07	12.2711	12.5833	noncoding	BC142990		NRED	2185	chr5	+	79783804	79837842		GGTGAGTGTTCTCCCCTCCAGTATCCATCTCCAAAATTCATAGCCTCCCATTATGATATT	exon sense-overlapping	NM_205548	FAM151B	hypothetical protein LOC167555	+	79783799	79838382
ASHG19A3A045142	1236.58	1416.07	10.187	10.5532	noncoding	ENST00000413181	AC135977.1	Ensembl	966	chr11	-	49455024	49455990	NM_032315,	AGAACAGAAAGTGAGGGGCTTTAAGCAGGTGAATACACTCCAGTGTGCTCGTTACGTTTA	intergenic
ASHG19A3A000380	223.369	260.767	7.71976	8.11165	noncoding	ENST00000462717	RP11-245J9.4	Ensembl	441	chr3	+	63997639	64001922		AAACCTTGGGATACCAGCCTTCCATTTTGTGCATATAATAAACGAGTAAAAGGCCGGGCG	intronic antisense	NM_014814	PSMD6	26S proteasome non-ATPase regulatory subunit 6	-	63996230	64009120
ASHG19A3A043559	304.191	318.216	8.1624	8.40298	noncoding	CR592477		misc_RNA	2305	chr10	+	6019376	6021681		CCTACTGCCTCATCCTGTCAAAACTTAATATGTCTGCTCAATGTTTGCTTCAGATATTTT	natural antisense	NM_002189	IL15RA	interleukin-15 receptor subunit alpha isoform 1	-	5994333	6019574
ASHG19A3A043559	304.191	318.216	8.1624	8.40298	noncoding	CR592477		misc_RNA	2305	chr10	+	6019376	6021681		CCTACTGCCTCATCCTGTCAAAACTTAATATGTCTGCTCAATGTTTGCTTCAGATATTTT	natural antisense	NM_172200	IL15RA	interleukin-15 receptor subunit alpha isoform 2	-	5994333	6019574
ASHG19A3A012226	554.385	760.765	9.01766	9.66155	noncoding	M28219		NRED	282	chr19	+	11234004	11242821		TTGGTCACGAGATGGAGTCCAGGTGTCGTCCTCACTCCCTTGCTGACCTTCTCTCACTTG	exon sense-overlapping	NM_001195803	LDLR	low-density lipoprotein receptor isoform 6	+	11200037	11244505
ASHG19A3A012226	554.385	760.765	9.01766	9.66155	noncoding	M28219		NRED	282	chr19	+	11234004	11242821		TTGGTCACGAGATGGAGTCCAGGTGTCGTCCTCACTCCCTTGCTGACCTTCTCTCACTTG	exon sense-overlapping	NM_001195800	LDLR	low-density lipoprotein receptor isoform 4	+	11200037	11244505
ASHG19A3A012226	554.385	760.765	9.01766	9.66155	noncoding	M28219		NRED	282	chr19	+	11234004	11242821		TTGGTCACGAGATGGAGTCCAGGTGTCGTCCTCACTCCCTTGCTGACCTTCTCTCACTTG	exon sense-overlapping	NM_000527	LDLR	low-density lipoprotein receptor isoform 1	+	11200037	11244505
ASHG19A3A012226	554.385	760.765	9.01766	9.66155	noncoding	M28219		NRED	282	chr19	+	11234004	11242821		TTGGTCACGAGATGGAGTCCAGGTGTCGTCCTCACTCCCTTGCTGACCTTCTCTCACTTG	exon sense-overlapping	NM_001195799	LDLR	low-density lipoprotein receptor isoform 3	+	11200037	11244505
ASHG19A3A012226	554.385	760.765	9.01766	9.66155	noncoding	M28219		NRED	282	chr19	+	11234004	11242821		TTGGTCACGAGATGGAGTCCAGGTGTCGTCCTCACTCCCTTGCTGACCTTCTCTCACTTG	exon sense-overlapping	NM_001195802	LDLR	low-density lipoprotein receptor isoform 5	+	11200037	11244505
ASHG19A3A012226	554.385	760.765	9.01766	9.66155	noncoding	M28219		NRED	282	chr19	+	11234004	11242821		TTGGTCACGAGATGGAGTCCAGGTGTCGTCCTCACTCCCTTGCTGACCTTCTCTCACTTG	exon sense-overlapping	NM_001195798	LDLR	low-density lipoprotein receptor isoform 2	+	11200037	11244505
ASHG19A3A027263	111.717	106.803	6.73052	6.81725	noncoding	AB002441		misc_RNA	561	chr5	-	115363741	115364181		TTAACAGTCTGGAGAGACCAGCCTACATGCTCTTTTGGCAAGATCAGTAGTTCTTGGCAT	intergenic
ASHG19A3A007732	412.339	473.287	8.59297	8.98063	noncoding	NR_033195	ZFAND1	RefSeq_NR	2148	chr8	-	82613567	82633539		AGTTGGACATCGGGCAGCACTGCCAGATTTTCTTCCATTTGTGTGTGATGATTGTTCAGG	exon sense-overlapping	NM_001170797	ZFAND1	AN1-type zinc finger protein 1 isoform c	-	82615148	82633539
ASHG19A3A007732	412.339	473.287	8.59297	8.98063	noncoding	NR_033195	ZFAND1	RefSeq_NR	2148	chr8	-	82613567	82633539		AGTTGGACATCGGGCAGCACTGCCAGATTTTCTTCCATTTGTGTGTGATGATTGTTCAGG	exon sense-overlapping	NM_024699	ZFAND1	AN1-type zinc finger protein 1 isoform a	-	82613565	82633539
ASHG19A3A007732	412.339	473.287	8.59297	8.98063	noncoding	NR_033195	ZFAND1	RefSeq_NR	2148	chr8	-	82613567	82633539		AGTTGGACATCGGGCAGCACTGCCAGATTTTCTTCCATTTGTGTGTGATGATTGTTCAGG	exon sense-overlapping	NM_001170796	ZFAND1	AN1-type zinc finger protein 1 isoform b	-	82613565	82633539
ASHG19A3A012966	65766.2	70006.5	15.9893	16.1105	noncoding	ENST00000477141	CTD-3099C6.4	Ensembl	156	chr19	+	53067328	53067484	ENST00000490784,	AATAAAATCAGGTCCAACTTTAAAAGGAGACATTGGAGAAGAACCAAGCTGGGTCTATAA	intergenic
ASHG19A3A000365	58.3263	68.9485	5.78222	6.18748	noncoding	ENST00000456100	AL163953.3	Ensembl	562	chr14	+	53684429	54153976		AGCATGTTGTCACCTCTCAATACATAAAACTACTGGAGGGTGGTTCCAAGATGGCCAAAT	intergenic
ASHG19A3A052327	580.081	594.774	9.08341	9.30833	noncoding	AK127294		misc_RNA	4073	chr15	-	70598856	70602887		ATGGTGGAGAGTACAGGGAAATAGATTTGACTAGATAGGAGGAGGTTCATTCCCTCCCAA	intergenic
ASHG19A3A032354	58.2487	67.7549	5.77974	6.16204	noncoding	ENST00000420557	C6orf208	Ensembl	2318	chr6	+	170190416	170202969	NR_026780,	ATGCATGTTGCCCACATAGCTCAGCAACAGATGCTCTCACGCTTGTTAAAAGTAAAACCG	intergenic
ASHG19A3A024870	51002.6	59225.5	15.6072	15.8748	noncoding	NR_001562	ANXA2P1	RefSeq_NR	1343	chr4	-	154228620	154229963	NR_001446,NM_004039,NM_001136015,NM_001002858,NM_001002857,	GAAACACTTTGCCTCCTGTGTACTGTGTCATAAACGGATTAATAAACTGAATTTGTACTT	intronic antisense	NM_001130067	TRIM2	tripartite motif-containing protein 2 isoform 2	+	154074269	154260474
ASHG19A3A024870	51002.6	59225.5	15.6072	15.8748	noncoding	NR_001562	ANXA2P1	RefSeq_NR	1343	chr4	-	154228620	154229963	NR_001446,NM_004039,NM_001136015,NM_001002858,NM_001002857,	GAAACACTTTGCCTCCTGTGTACTGTGTCATAAACGGATTAATAAACTGAATTTGTACTT	intronic antisense	NM_015271	TRIM2	tripartite motif-containing protein 2 isoform 1	+	154125597	154260474
ASHG19A3A048268	103.75	173.822	6.62427	7.52545	noncoding	uc001qoa.2	SRP14P1	UCSC_knowngene	331	chr12	+	6547666	6547997		TATTCAAACCTACTGAGAGCTAACATGGACGGGCTGAGAAGAGGGACAAAAAGAGCAAAA	intergenic
CUST_739_PI426073487	74.9625	73.9591	6.14964	6.28651	noncoding	uc.260-	uc.260	UCR	231	chr9	-	81472423	81472654		TTCATTTTTCTCTATCTTCCAGCCATCCAGCTGGCATCTATAATGGATATCCTGGGGGCT	intergenic
ASHG19A3A027720	214.684	375.169	7.66348	8.64296	noncoding	ENST00000515403	RP11-844P9.2	Ensembl	3632	chr5	-	175570087	175612158	uc003mdn.2,	CCTGCCTGTTATGAGGGACAGGTAGGAGAGGATGGGCTTTCCATCAAAACAAACAAAAAA	intergenic
ASHG19A3A014963	471.654	211.295	8.78727	7.80908	noncoding	uc001amm.2	C1orf211	UCSC_knowngene	1248	chr1	+	6297870	6299490		AAAGGAGAGGAAGCAGATCTAAGCACACATGGGCATCAAACCAGAGGAACAAAGTCACAT	intergenic
ASHG19A3A028385	4248.72	3626.81	11.9743	11.9012	noncoding	ENST00000511688	CTD-2060C23.1	Ensembl	1107	chr5	+	74094818	74095925		TCGATGGAGAGCCATGACAATTTGGGATTTCAAGGATAATTTGAAGCTGAGTGAGCCTCC	intronic antisense	NM_015566	FAM169A	hypothetical protein LOC26049	-	74073398	74162615
ASHG19A3A020915	416.33	379.906	8.60541	8.66163	noncoding	BC040602		misc_RNA	2182	chr3	-	40496576	40498720		TTCATGGCTAGGTCTGTTCGCTCCTCACGTTCTCTCCTAATCTCAGTAACTTTGTTAACC	bidirectional	NM_001034996	RPL14	60S ribosomal protein L14	+	40498829	40503859
ASHG19A3A020915	416.33	379.906	8.60541	8.66163	noncoding	BC040602		misc_RNA	2182	chr3	-	40496576	40498720		TTCATGGCTAGGTCTGTTCGCTCCTCACGTTCTCTCCTAATCTCAGTAACTTTGTTAACC	bidirectional	NM_003973	RPL14	60S ribosomal protein L14	+	40498800	40503859
ASHG19A3A040894	84.4591	88.5988	6.32125	6.53983	noncoding	ENST00000447169	RP5-1158E12.2	Ensembl	754	chrX	+	45772552	45773306		AATCTATGCCCAAATCTGATCTGGGCTCCTGTTCTTGTTCTCAAAGCAGATCTAAGGATG	intergenic
ASHG19A3A042061	103.141	201.966	6.61592	7.74295	noncoding	ENST00000457163	AC006156.5	Ensembl	923	chrY	+	9385716	9388290		TTCTCATTCCACTCCAATTGATTGGTATCCAGATTATGAAGTGGAGGCCTATCGCCGCAA	intergenic
ASHG19A3A044410	81.1172	89.7968	6.26302	6.55885	noncoding	ENST00000412353	RP11-190J1.10	Ensembl	850	chr10	+	103578834	103588536		AGTAAATCTGCTTGAAGTTCTCCTCATTGACAATTCCGCTGGGACATTCCTGGAAGGAGA	natural antisense	NM_173194	KCNIP2	Kv channel-interacting protein 2 isoform 5	-	103585730	103599611
ASHG19A3A044410	81.1172	89.7968	6.26302	6.55885	noncoding	ENST00000412353	RP11-190J1.10	Ensembl	850	chr10	+	103578834	103588536		AGTAAATCTGCTTGAAGTTCTCCTCATTGACAATTCCGCTGGGACATTCCTGGAAGGAGA	bidirectional	NM_012215	MGEA5	bifunctional protein NCOAT isoform a	-	103544199	103578222
ASHG19A3A044410	81.1172	89.7968	6.26302	6.55885	noncoding	ENST00000412353	RP11-190J1.10	Ensembl	850	chr10	+	103578834	103588536		AGTAAATCTGCTTGAAGTTCTCCTCATTGACAATTCCGCTGGGACATTCCTGGAAGGAGA	bidirectional	NM_001142434	MGEA5	bifunctional protein NCOAT isoform b	-	103544199	103578222
ASHG19A3A044410	81.1172	89.7968	6.26302	6.55885	noncoding	ENST00000412353	RP11-190J1.10	Ensembl	850	chr10	+	103578834	103588536		AGTAAATCTGCTTGAAGTTCTCCTCATTGACAATTCCGCTGGGACATTCCTGGAAGGAGA	natural antisense	NM_173197	KCNIP2	Kv channel-interacting protein 2 isoform 7	-	103587397	103603677
ASHG19A3A044410	81.1172	89.7968	6.26302	6.55885	noncoding	ENST00000412353	RP11-190J1.10	Ensembl	850	chr10	+	103578834	103588536		AGTAAATCTGCTTGAAGTTCTCCTCATTGACAATTCCGCTGGGACATTCCTGGAAGGAGA	natural antisense	NM_014591	KCNIP2	Kv channel-interacting protein 2 isoform 1	-	103585730	103603677
ASHG19A3A044410	81.1172	89.7968	6.26302	6.55885	noncoding	ENST00000412353	RP11-190J1.10	Ensembl	850	chr10	+	103578834	103588536		AGTAAATCTGCTTGAAGTTCTCCTCATTGACAATTCCGCTGGGACATTCCTGGAAGGAGA	natural antisense	NM_173191	KCNIP2	Kv channel-interacting protein 2 isoform 2	-	103585730	103603677
ASHG19A3A044410	81.1172	89.7968	6.26302	6.55885	noncoding	ENST00000412353	RP11-190J1.10	Ensembl	850	chr10	+	103578834	103588536		AGTAAATCTGCTTGAAGTTCTCCTCATTGACAATTCCGCTGGGACATTCCTGGAAGGAGA	natural antisense	NM_173193	KCNIP2	Kv channel-interacting protein 2 isoform 4	-	103585730	103603677
ASHG19A3A044410	81.1172	89.7968	6.26302	6.55885	noncoding	ENST00000412353	RP11-190J1.10	Ensembl	850	chr10	+	103578834	103588536		AGTAAATCTGCTTGAAGTTCTCCTCATTGACAATTCCGCTGGGACATTCCTGGAAGGAGA	natural antisense	NM_173195	KCNIP2	Kv channel-interacting protein 2 isoform 6	-	103585730	103603677
ASHG19A3A044410	81.1172	89.7968	6.26302	6.55885	noncoding	ENST00000412353	RP11-190J1.10	Ensembl	850	chr10	+	103578834	103588536		AGTAAATCTGCTTGAAGTTCTCCTCATTGACAATTCCGCTGGGACATTCCTGGAAGGAGA	natural antisense	NM_173192	KCNIP2	Kv channel-interacting protein 2 isoform 3	-	103585730	103603677
ASHG19A3A040079	430.637	348.82	8.65761	8.53618	noncoding	NR_028379	NCRNA00182	RefSeq_NR	2356	chrX	-	73247970	73513409		GCTTCCTTCTGTAAAATTTGGACTGTTTGTTCTTCCCATTATATTAATAGTTGCTTCAGG	intergenic
ASHG19A3A046568	802.778	692.559	9.56204	9.52436	noncoding	ENST00000413292	AP001187.12	Ensembl	563	chr11	+	64685024	64691932		TGCGACTCCTTCCTGTCAGTGTCCTGGCATCACCCTACTTTCCTGGTGCAAACTCCTAAG	bidirectional	NM_015104	ATG2A	autophagy-related protein 2 homolog A	-	64662003	64684722
ASHG19A3A054279	220.187	221.82	7.69953	7.87645	noncoding	BC011942		misc_RNA	487	chr16	+	9079619	9086461		AACAAAAATTCAGGCAACGTAGTGAGACTCTGTCTCCTGCGGTTGATACCTGTTCTACCT	intergenic
ASHG19A3A048407	102.706	89.0259	6.61015	6.54662	noncoding	ENST00000363605	AC007535.2	Ensembl	345	chr12	+	13836475	13836820		TGTATTAGTTGTTATTATTATTACCTATTTTTTACATTGCCTGGGTGTCAGGGGAGTTAG	intronic antisense	NM_000834	GRIN2B	glutamate [NMDA] receptor subunit epsilon-2	-	13714409	14133022
ASHG19A3A018524	111.928	143.675	6.73296	7.24756	noncoding	uc010gjw.1	AK309218	UCSC_knowngene	3684	chr20	+	58713536	59228976		GAGAAAAGACGTCCTTGCTGTGTTCCTGATATGAAGAGGAAAGCAGTCCTTCTCCATTAA	intergenic
ASHG19A3A007913	14348.6	16305.6	13.7362	14.0618	noncoding	BC007549		misc_RNA	1798	chr1	-	171453554	171455327		TAAATTATGAACACCTCCCTCCCCACTAATATTAATTTGAAGTAGAAAAGTCTGGACTTG	natural antisense	NM_015172	PRRC2C	protein PRRC2C	+	171454665	171562650
ASHG19A3A036232	483.664	427.354	8.82384	8.83526	noncoding	ENST00000435492	RP11-317P15.3	Ensembl	259	chr1	+	182681996	182683679		AAGCTCCCACTAACACCTTACCACTCTCTACCATGTCAACTTATTTTATTATAACAATTG	intergenic
ASHG19A3A025030	287.592	340.024	8.0837	8.49817	noncoding	AK096223		NRED	1807	chr4	-	177239810	177241615		AGAGATCCTTAGTTGCGTTTAAAATCTTAGTTTTTAACTTCCAGGCTGGCACAGTTTGTT	natural antisense	NM_021928	SPCS3	signal peptidase complex subunit 3	+	177241089	177253396
ASHG19A3A000058	70.9748	75.378	6.07046	6.31468	noncoding	ENST00000332088	AL353997.4	Ensembl	839	chr17	+	18324132	18328200		TACAGCCGCTTGCTAGAGGTTGAGGACGCCCAGCTGGCCACTCAGTACTCCTTGTCCCTG	intergenic
ASHG19A3A050709	156.771	172.59	7.21075	7.51472	noncoding	ENST00000501776	AL162311.2	Ensembl	2867	chr14	-	36288429	36295971		TAACTGGTAGTAATGTGGAATGAAGCTGGATCCTATCTGCTCCCAAATTGGCTTGTCTCC	natural antisense	NM_032352	BRMS1L	breast cancer metastasis-suppressor 1-like	+	36295596	36341169
ASHG19A3A008065	283.218	388.932	8.06157	8.696	noncoding	ENST00000428754	AC015818.5	Ensembl	107	chr17	-	20394650	20394757	NR_024178,ENST00000441958,ENST00000432936,	GGACAAACACCTTATTCCAGCAGCTAACACTGGCAAGTCCAAGGTTTTCTATTATGAAAT	intergenic
ASHG19A3A009247	83.8901	77.6517	6.31233	6.35918	noncoding	NR_023380	CCDC144C	RefSeq_NR	4204	chr17	+	20224486	20305504	NM_182568,NM_014695,ENST00000507171,	TTCTCTCAGGGAATGATACTCTCCATGACCTGTGCCAATCACAGCTACCAGAAAACAAAG	intergenic
ASHG19A3A029342	2918.31	4897.21	11.4199	12.3357	noncoding	uc001ejz.1	AF379632	UCSC_knowngene	969	chr1	+	144162000	144167711	uc001erc.3,uc001ekp.3,NM_183372,NM_173638,NM_017940,NM_015383,NM_015383,NM_001170755,NM_001102663,NM_001101663,NM_001039703,NM_001039703,NM_001039703,NM_001039703,NM_001039703,NM_001039703,NM_001039703,NM_001039703,NM_001039703,NM_001039703,NM_001039703,NM_001039703,AX747492,	ATAGATGTTATTCGACTCCTTCAGGTTATCTTGAACTGCCTGACTTAGGCCAGCCCTACA	intergenic
ASHG19A3A008570	109.189	101.914	6.69791	6.7458	noncoding	ENST00000502300	RP11-94C24.6	Ensembl	349	chr17	-	48580772	48585689		ACACAAGGAGGGATTTTCAGAGGCTTTGGAGTACAGTGTGTGTTTGCTTCTCAACTTTGC	bidirectional	NM_032133	MYCBPAP	MYCBP-associated protein	+	48585744	48608862
ASHG19A3A043608	478.115	390.265	8.8078	8.70067	noncoding	AK126099		misc_RNA	2985	chr10	+	11437806	11440791		GATCCAGCTCTGCTTCATTAATCTTTCCCTTCTAGAAATGCTTCCTCATGCACTACTTTT	intergenic
ASHG19A3A049685	216.813	251.409	7.67741	8.05846	noncoding	ENST00000452933	RP11-318G21.2	Ensembl	546	chr13	-	78563506	78564781		CCTTTTTCCAAACTATAGCATAAATCACAGAAAAGTATCTCCTCATTTGTTTGGGATGAG	intergenic
ASHG19A3A000510	138.54	129.964	7.02987	7.10576	noncoding	ENST00000514568	AC092279.2	Ensembl	842	chr19	-	24224401	24225364		ctccacgtcctcaccagagcagctagatacagtgtggattggtgcactcacaaaccttga	intergenic
ASHG19A3A055109	472.06	718.426	8.78882	9.57612	noncoding	uc001vgm.1	DKFZp434F1622	UCSC_knowngene	3781	chr13	-	52741846	52865680		GATGTGAAAGTGCAAGCTTCCTCTTCAGACAAAAAATAATATCCAAAGATATTTTGGCAC	intergenic
ASHG19A3A025505	234.974	113.287	7.79084	6.90268	noncoding	ENST00000509521	RP11-241F15.4	Ensembl	1163	chr4	+	49517189	49518352		GTCACACTCTTGCCAGCAGAAGAGGCCCCTGTCATGGCCGATATTACCACCCAGTCTATC	intergenic
ASHG19A3A015138	93.0502	128.713	6.46589	7.09298	noncoding	AF130098		misc_RNA	1668	chr2	-	234970685	234971785		TTCTCATTCCTGTTGTAATGGAGTTCTGTCCATTTCAACCCACCAGCTTTCCTGGCAATT	intronic antisense	NM_006944	SPP2	secreted phosphoprotein 24 precursor	+	234959345	234985776
ASHG19A3A038303	111.024	119.339	6.72069	6.98069	noncoding	ENST00000445631	RP11-91N2.3	Ensembl	206	chr9	+	2541096	2541635		CTCTGAAAGAATCCAGTTATGGGAACACAAATTACCTCATCCTCAGTTTCACTTTAAAAT	intergenic
ASHG19A3A038809	18047.3	19284.8	14.0746	14.3122	noncoding	ENST00000451550	ATP5J2P3	Ensembl	258	chr9	+	79655331	79655589	ENST00000437332,	AAGAGGTTACTACTGGTACTACAACAAATACATCAACGTGAAGAAGGGGAGCATCTCGGG	intergenic
ASHG19A3A010292	101.546	118.615	6.59542	6.97183	noncoding	AK091642		misc_RNA	2600	chr18	-	44366661	44369260		TGTAGAGCTTGGACTCCTTCAACTTAATGGTAAAGCCTCCTCTGAGTTCAAGAATTTTTT	intergenic
ASHG19A3A024191	39049.2	43046.8	15.2017	15.435	noncoding	ENST00000484463	RP11-463H12.1	Ensembl	214	chr4	-	55842324	55842538		TCCTTTATACCCTGATCATCACTGACAAAGAGAAGGCAGAGAAACTGAACTAGTCCCTGC	intergenic
ASHG19A3A036531	189.634	144.064	7.48202	7.25162	noncoding	ENST00000516854	AC124073.1	Ensembl	280	chr8	+	36124002	36124282		CCCTTCTACAGCCTCCATATCAGCAGCTAAATGCCATTTATTTAAGTTTATAGAAAACAA	intergenic
ASHG19A3A031631	940.776	378.475	9.78902	8.65677	noncoding	AL049354		NRED	1275	chr6	+	52532698	52533951	NR_024405,NR_024403,	ACTTCACAGAAATGGAAGGTAACCTCTTTAGACGTGTGCCTGCAAGATGGCTGTCATTGT	intergenic
ASHG19A3A042749	86.6652	71.1128	6.35736	6.23125	noncoding	NR_029396	LOC399753	RefSeq_NR	2141	chr10	-	49218160	49239658	uc001jeu.3,uc001jei.2,NM_001077685,NM_001077665,ENST00000436180,ENST00000417888,ENST00000399470,ENST00000339771,	ACTGTTGAAGTTGGTGAGGACCTCCACATGCACCAGGTTCGTGACCGGGAGATGCCTGAA	intergenic
ASHG19A3A023503	1758.62	1602.96	10.6978	10.7316	noncoding	ENST00000494900	RP11-152C17.1	Ensembl	429	chr3	+	168720861	168723254		CGGTCCAAAGTATTTGACTTGCTAAAGAATCTTTCCCTCCTAGAAGTATAAAATTCTACT	intergenic
ASHG19A3H0000066	441.099	482.798	8.69206	9.01078	noncoding	nc-HOXB9-189-	nc-HOXB9-189	HOX cluster	138	chr17	-	46720237	46720375		AGCAACCTTTTTGCTTCAGGGCTCCTCCTGGGGGCTGAGTGGTCCCCTTTGCTTTGCTAT	intergenic
ASHG19A3A031608	726.856	648.207	9.41512	9.43105	noncoding	ENST00000402892	RP1-142O9.2	Ensembl	195	chr6	+	49241240	49241435		AGTCCTACCTCAGATTCTGCATCTGTACAGAGAGCAGACACCAGCTTAAATGACTGTGAA	intergenic
ASHG19A3A041217	200.656	244.162	7.56226	8.01404	noncoding	ENST00000453566	RP3-346O6.2	Ensembl	213	chrX	+	76983343	76983556		TTAGCGGTAGAATGTGTTATGTACAATGCCACCTCTCCTCGAATCCATAAAAAAGTGTAA	intronic antisense	NM_000489	ATRX	transcriptional regulator ATRX isoform 1	-	76760355	77041719
ASHG19A3A041217	200.656	244.162	7.56226	8.01404	noncoding	ENST00000453566	RP3-346O6.2	Ensembl	213	chrX	+	76983343	76983556		TTAGCGGTAGAATGTGTTATGTACAATGCCACCTCTCCTCGAATCCATAAAAAAGTGTAA	intronic antisense	NM_138270	ATRX	transcriptional regulator ATRX isoform 2	-	76760355	77041719
ASHG19A3A036131	104.95	141.994	6.64179	7.2297	noncoding	uc003ysg.2	BC042052	UCSC_knowngene	3296	chr8	-	128698589	128746210		AAGAGATGGTGAAAATTAACCTATCACCACTGCTAATGAACATCACCCTATGGAGAACCG	intergenic
ASHG19A3L0001531	1168.16	1170.42	10.108	10.2815	noncoding	DN920247	lincRNA-SCARB2	lincRNA	527	chr4	-	77102106	77155656	NM_005506,	GCCTATGTTTTTGAACAAGACCAATCTGTTGGAGACCCTAAAATTGACTTAAATAGAACA	exon sense-overlapping	NM_001204255	SCARB2	lysosome membrane protein 2 isoform 2	-	77079891	77135052
ASHG19A3L0001531	1168.16	1170.42	10.108	10.2815	noncoding	DN920247	lincRNA-SCARB2	lincRNA	527	chr4	-	77102106	77155656	NM_005506,	GCCTATGTTTTTGAACAAGACCAATCTGTTGGAGACCCTAAAATTGACTTAAATAGAACA	exon sense-overlapping	NM_005506	SCARB2	lysosome membrane protein 2 isoform 1	-	77079891	77135052
ASHG19A3A044524	71.8377	75.5222	6.08689	6.31725	noncoding	ENST00000436932	RP11-106M7.1	Ensembl	2378	chr10	+	116524546	116539662		GGCTGTTTGACATTGATTTTTTAAAAAATACATTTCCTGAGGTCTCACTAGTGCCAGAAT	intergenic
ASHG19A3A039633	26167.3	19392.9	14.6119	14.3214	noncoding	ENST00000399997	RP11-431J24.4	Ensembl	855	chrX	-	16216550	16217414		ATCTGCTATGTGTTGCAGAAAGGCCATGTACAAGCGGAAGTACTCAGCTGCTAAATCCAA	intergenic
ASHG19A3A016397	118.323	115.611	6.80854	6.93267	noncoding	NR_024275	LOC151162	RefSeq_NR	5251	chr2	+	135206959	135212191		TTTTTTCTTAGGCCCACTGAGATCCCTGCTCAGTGCGTCTCAATTGTATCTCCAGTCTAA	intergenic
CUST_471_PI426073487	512.022	422.179	8.90133	8.81473	noncoding	uc.473+	uc.473	UCR	222	chrX	+	70373223	70373445		GCAGTCATGCTGTTTTTGAATTCTCTCTCTGTTTTGTTCTCTGTTCTGTGCTGTTGTGTC	exon sense-overlapping	NM_181303	NLGN3	neuroligin-3 isoform 1	+	70364680	70391051
CUST_471_PI426073487	512.022	422.179	8.90133	8.81473	noncoding	uc.473+	uc.473	UCR	222	chrX	+	70373223	70373445		GCAGTCATGCTGTTTTTGAATTCTCTCTCTGTTTTGTTCTCTGTTCTGTGCTGTTGTGTC	intron sense-overlapping	NM_001166660	NLGN3	neuroligin-3 isoform 3	+	70364680	70391051
CUST_471_PI426073487	512.022	422.179	8.90133	8.81473	noncoding	uc.473+	uc.473	UCR	222	chrX	+	70373223	70373445		GCAGTCATGCTGTTTTTGAATTCTCTCTCTGTTTTGTTCTCTGTTCTGTGCTGTTGTGTC	exon sense-overlapping	NM_018977	NLGN3	neuroligin-3 isoform 2	+	70364680	70391051
ASHG19A3A017906	242.877	230.382	7.83924	7.932	noncoding	NR_028295	NCRNA00029	RefSeq_NR	1764	chr20	-	61665569	61668380		GCAGCTGAGAGGCTCCCCGTCACGATGGCCAATAGCCCTTTCTCCAAGGACAAGGATGGG	intergenic
ASHG19A3A026669	106.194	100.49	6.65809	6.72504	noncoding	ENST00000515352	CTD-2517O10.5	Ensembl	425	chr5	-	34860887	34861611		CCTTGAGCAGAAAGCCAAATCTCACCTAGTAGGAAAGAAAAATAGTAGATATGAGGAAGA	intronic antisense	NM_144725	TTC23L	tetratricopeptide repeat protein 23-like	+	34839268	34899564
ASHG19A3A030892	1420.29	1187.61	10.3845	10.301	noncoding	BC043429		misc_RNA	2596	chr6	+	3020389	3022972		GACCCCGACCGTTTGCTGTTTTCTCCTCCTAATCATAATTTTTTCTTAGTTGGTTTCCAG	intergenic
ASHG19A3A044384	10984.1	10153.3	13.3517	13.3814	noncoding	ENST00000453578	RP11-316M21.5	Ensembl	825	chr10	+	102008027	102008852		TGAGATCCTCAAGTCAGTGGTGGCTCACTTTGATGCTGGAGAACTAATCACCTAAAGAGA	intronic antisense	NM_018294	CWF19L1	CWF19-like protein 1	-	101992054	102027437
ASHG19A3L0001694	128.291	105.618	6.92446	6.79967	noncoding	chr5:82684694-82704544+	lincRNA-VCAN	lincRNA	19851	chr5	+	82684694	82704544		TGATTTGACTAAATCAATTGTGATCATTCCATTTTCCCTGTCACTATTGTCTGAGGAAGT	intergenic
ASHG19A3A007134	614.463	388.236	9.16689	8.69345	noncoding	NR_003239	SNHG11	RefSeq_NR	1101	chr20	+	37075296	37079564		CATGCTAGACCTCAGTATCCTTGAGGGATGCTGCCTTGGGTCTGGAAACTGTTAGAGGAA	intergenic
ASHG19A3A016770	853.566	2009.81	9.64702	11.063	noncoding	uc010fsr.1	AK096649	UCSC_knowngene	2600	chr2	+	200323330	200325930		CTTCCGATTTAAAGGAGAGTTCTAGGAAGTTTTGTGATCTATGTCCGGTGTGGGTTTTTG	natural antisense	NM_001172517	SATB2	DNA-binding protein SATB2	-	200134222	200329831
ASHG19A3A016770	853.566	2009.81	9.64702	11.063	noncoding	uc010fsr.1	AK096649	UCSC_knowngene	2600	chr2	+	200323330	200325930		CTTCCGATTTAAAGGAGAGTTCTAGGAAGTTTTGTGATCTATGTCCGGTGTGGGTTTTTG	natural antisense	NM_015265	SATB2	DNA-binding protein SATB2	-	200134222	200335989
ASHG19A3A016770	853.566	2009.81	9.64702	11.063	noncoding	uc010fsr.1	AK096649	UCSC_knowngene	2600	chr2	+	200323330	200325930		CTTCCGATTTAAAGGAGAGTTCTAGGAAGTTTTGTGATCTATGTCCGGTGTGGGTTTTTG	bidirectional	NM_001172509	SATB2	DNA-binding protein SATB2	-	200134222	200322819
ASHG19A3A009926	185.32	225.658	7.45085	7.89935	noncoding	AK094291		RNAdb	2161	chr17	+	73126977	73129138		TCAGGACTTTATGTGGAACTGACATCGCTTACCTACTCCCGTCTAGAAAATGCTGAACAG	natural antisense	NM_014595	NT5C	"5'(3')-deoxyribonucleotidase, cytosolic type"	-	73126322	73127877
ASHG19A3A023158	542.784	535.863	8.98874	9.16118	noncoding	ENST00000485218	RP11-525K18.2	Ensembl	588	chr3	+	127794652	127797899		GAAAAAATAGGAGGAAAATTAAAATAATCCCACCTTCCTACCTATCCAGAACCATCTCCC	intergenic
ASHG19A3A019513	85.6667	77.203	6.3392	6.35056	noncoding	HIT000389476		H-invDB	280	chr22	-	21311691	21318877		TCATTGTCCTTAATGTGTGCATCTCTGCGTTGTAGGTAGACCTTGTCTTTCAAGCAGGCT	bidirectional	NM_144704	AIFM3	apoptosis-inducing factor 3 isoform 1	+	21319417	21335649
ASHG19A3A019513	85.6667	77.203	6.3392	6.35056	noncoding	HIT000389476		H-invDB	280	chr22	-	21311691	21318877		TCATTGTCCTTAATGTGTGCATCTCTGCGTTGTAGGTAGACCTTGTCTTTCAAGCAGGCT	bidirectional	NM_001018060	AIFM3	apoptosis-inducing factor 3 isoform 2	+	21319417	21335649
ASHG19A3A012619	651.95	390.174	9.25653	8.70017	noncoding	ENST00000504080	AC016590.1	Ensembl	2659	chr19	+	37816411	37820601		GTGACGTGCCTTTTTGTCTTGGTTGGGTATTTATTTGCAATACAAGAATGATTGTTTTCT	intergenic
ASHG19A3L0002146	202.753	224.73	7.58003	7.89432	noncoding	DB239440	lincRNA-SLC7A13	lincRNA	578	chr8	-	87229854	87333375	NM_138817,	GGCCAGCTGCCTTTGCTATTTAATACACTTAATAGTCACTCTTCTCCATTTACAGCTGTG	exon sense-overlapping	NM_138817	SLC7A13	solute carrier family 7 member 13	-	87226287	87242604
ASHG19A3H0000025	475.58	515.25	8.79875	9.10449	noncoding	nc-HOXA4-63-	nc-HOXA4-63	HOX cluster	108	chr7	-	27176447	27176555		CTAAGCTCCCACCCAAGTAGGGGAGGGGATCCACAGCCCCAGCCATTCTAAGCCCCAGAA	intergenic
ASHG19A3A043471	18163.9	17754	14.0858	14.1935	noncoding	ENST00000418634	RP13-439H18.7	Ensembl	693	chr10	-	134958115	134958808		TCTGAAAACAAGGAATTTAATGCAGAAGTACACGGAAGGGCATCATGGGCCAGAATGTTG	intergenic
ASHG19A3A010149	42734.1	45162.3	15.3387	15.4984	noncoding	ENST00000399792	AP000902.2	Ensembl	540	chr18	-	9678756	9679297	ENST00000488218,	TTCATGAAGAAGAACCATGAAGAGGAAGTAAAAGGCCTACAAGCCCAGACTGCCAGATCT	intergenic
ASHG19A3A007680	814.613	858.289	9.58276	9.83361	noncoding	NR_028582	G6PC3	RefSeq_NR	1713	chr17	+	42148097	42153711		GGTCCCCACCCCCGAGGGCCCTGAGTCATGTGTTTCTTTTTGGAGACAGGCCCTTTTGGT	exon sense-overlapping	NM_138387	G6PC3	glucose-6-phosphatase 3	+	42148097	42153712
ASHG19A3A034572	606.195	521.548	9.14685	9.12174	noncoding	ENST00000403118	AC005102.1	Ensembl	479	chr7	+	75464980	75465459		AGATTGATACATAACAGACACCTGCACAGAGCGTAAACAGAGGTGGCATGACTAGAAACC	intergenic
ASHG19A3A011204	56422.4	68092.1	15.7625	16.0664	noncoding	ENST00000469924	CTD-3131K8.1	Ensembl	477	chr19	-	17700403	17700880	NR_026911,NM_000982,ENST00000497298,ENST00000495531,ENST00000494303,ENST00000491435,ENST00000485945,ENST00000482905,ENST00000480465,ENST00000472093,ENST00000471393,ENST00000461458,ENST00000441274,ENST00000422570,ENST00000418441,ENST00000417077,ENST00000416102,ENST00000407436,ENST00000403916,ENST00000401418,ENST00000396599,	AAATGATCAGAAAAAGAAAGAAGCCAAAGAGAAAGGTGCCTGGGTTCAACTGAAGCGCCA	intergenic
ASHG19A3A010639	975.62	1460.59	9.84109	10.5997	noncoding	ENST00000432117	AC037473.1	Ensembl	741	chr18	+	45156482	45157223		CCTGGGAAAGAAGTTTCAATATCTCCTGTGTGTCTTTCTTACGATCCAACTAAACATCCA	intergenic
ASHG19A3A043485	72.6581	84.5387	6.10276	6.47675	noncoding	ENST00000394842	XX-2136C111.2	Ensembl	485	chr10	-	135450911	135451396	ENST00000514074,	AAATGGACTGTGAGGATAAGGTTCTGGGCAGGATGGTTCGCTGCCCTCCAGAGACGCAGA	intergenic
ASHG19A3L0000558	1052.59	1047.62	9.95761	10.1145	noncoding	AI014992	lincRNA-KLRB1	lincRNA	458	chr12	+	9486815	9488187		TATAAACACTTCCTCCCAGATTCTGAGCAGGATGACAGATCCCAGGACCAACTCTAAAGT	intergenic
ASHG19A3A031671	2176.7	2836.55	10.993	11.5544	noncoding	ENST00000403408	RP11-184C23.3	Ensembl	250	chr6	+	63937387	63937637	NM_178324,NM_006415,ENST00000457558,ENST00000450718,ENST00000435997,ENST00000407089,	AAAGAAGAACTGATTGAAGAGTGGCAACCACAACCTCTTGTTCCTCCTGTCCCAAAAGAC	intergenic
ASHG19A3A031612	64.1919	90.2329	5.9248	6.56506	noncoding	AK126282		misc_RNA	2077	chr6	+	49689643	49691720		CCCCTGGCATACAGCAGTAAAAACTGTGATCCTCTTTATCATTATCTTGGTTTTTTCTTT	intergenic
ASHG19A3A051898	102255	106541	16.6481	16.6921	noncoding	ENST00000460876	RP11-2F9.1	Ensembl	624	chr15	-	22440222	22440846	uc003jhx.2,NM_001012,ENST00000467270,ENST00000392301,	AGCAGATGGGTATGTGCTAGAGGGCAAAGAGTTGGAGTTCTATCTTAGGAAAATCAAGGC	intergenic
ASHG19A3A018723	69.814	72.1022	6.04698	6.25112	noncoding	ENST00000433310	AF131217.1	Ensembl	900	chr21	-	29816869	30047170		TTGTGGAGTAAGTGAGTGGGCCTGAGTTGAGAAGATCCTGGCCTTGGATTTTAAAACTGT	intergenic
ASHG19A3A047824	287.235	256.491	8.08135	8.08733	noncoding	AK093825		misc_RNA	3180	chr12	-	75885884	75889064		GAGACTGCCCTGTTCTCCTTTGGAGCTCAGTAAAACAAATATTTGTTGAATAAATGAATA	intronic antisense	NM_006851	GLIPR1	glioma pathogenesis-related protein 1 precursor	+	75874512	75895716
ASHG19A3A031058	246.89	206.764	7.86263	7.77825	noncoding	ENST00000405827	RP1-59B16.1	Ensembl	1045	chr6	+	23972106	23973151		TCCAAAAAGCTGCTAAACTGGGATATCCAGGTTAGGAAGAGCGGATATTCCTCTGTGGAA	intergenic
ASHG19A3H0000065	76.611	99.6328	6.17985	6.71296	noncoding	nc-HOXB9-188-	nc-HOXB9-188	HOX cluster	98	chr17	-	46719077	46719175		GGGGCGCTGAGGAGGTCATTAACCTCCCCGTAAAGATGGGGAACGGAGACGCGCCTGGCC	intergenic
ASHG19A3A020083	987.623	1035.06	9.86404	10.0986	noncoding	U84522		misc_RNA	258	chr22	+	19384143	19384288		ATTCCCCAGGTGGCCTGGCCCATGGCCAGCTCCCTCTCTGTACACAGAAGTCAGGAAGAG	intronic antisense	NM_003325	HIRA	protein HIRA	-	19318223	19419219
ASHG19A3A027020	7117.74	6039.91	12.7193	12.641	noncoding	NR_003665	LOC441089	RefSeq_NR	1362	chr5	-	79646423	79647785	NM_004269,	CTTGTGTTTTGTGGGGCTTGGGGTTTGGTAACTTATTTTTATAAGCAATAAACCTTTTGT	intergenic
ASHG19A3A029872	10446.9	10369.9	13.2827	13.4126	noncoding	ENST00000444731	RP11-552E20.1	Ensembl	539	chr6	-	40239304	40243976		AGGCTGTGTCTCCCTCCTCAGACTGAAGGATCTTTGTGATCAGATGCTGTGTCTATATCC	intergenic
ASHG19A3A053205	600.168	13001.7	9.1332	13.7382	noncoding	NR_026869	NCRNA00052	RefSeq_NR	1786	chr15	+	88120159	88122917		CTCTAAGACTCAGAAGAACTTTCTCAGGCATTCATTTTCCTATCTATTTTGAGCCATTTT	intergenic
ASHG19A3A019396	140.296	137.92	7.04894	7.18965	noncoding	ENST00000447478	RP4-534N18.2	Ensembl	517	chr1	+	32398620	32399576		CTCTACCATCACCCTATTCGATAAACATAACTAAGTCCACCATGTTAAAACTATGGATCC	intronic antisense	NM_080391	PTP4A2	protein tyrosine phosphatase type IVA 2 isoform	-	32372021	32403988
ASHG19A3A043330	1837.94	1628.7	10.757	10.7557	noncoding	ENST00000449709	RP11-295O23.4	Ensembl	577	chr10	-	118198979	118199556		CTATAAGTCGAAAGTAAAGTTTGATGGCGCAAAGCGTCCTGCTAAAGTTGCCCGGAAAAA	intronic antisense	NM_001011709	PNLIPRP3	pancreatic lipase-related protein 3 precursor	+	118187423	118237468
ASHG19A3A025723	4691.87	4893.34	12.122	12.3334	noncoding	uc010ijm.1	AK094144	UCSC_knowngene	3134	chr4	+	79834383	79837517		AACTTCAGTCCTCAAATATAGCTGGGAAACAATTATGAGATAGACTCAGTCTCCCCCTCC	intergenic
ASHG19A3A025660	661.629	706.754	9.27831	9.5523	noncoding	ENST00000432395	RP5-943J3.1	Ensembl	509	chr1	+	90254472	90256051		ATGAAGTTTTGCCATGAACGTAGATCCTCCCTTACAAATCCCTCCATTTTCAAACCCGAG	intergenic
ASHG19A3A019456	164.529	152.716	7.27975	7.33837	noncoding	ENST00000481698	AC000095.8	Ensembl	905	chr22	-	19019076	19022077	ENST00000424817,	AATGGACACTGATCCTCAGAACCACCTGGAGATTTGGGAGGCTGGGCTGCTGTTGCCTGT	intergenic
ASHG19A3A008456	149.195	131.475	7.13974	7.12168	noncoding	uc010wjv.1	LRRC37A2	UCSC_knowngene	1355	chr17	-	43616528	43629863	AK126994,	AGAAATCTGATTATAACAATAGCTCCATCCCTAAATGAGGTGAATCTTGGAATCTCTTCC	intergenic
CUST_425_PI426073487	762.612	748.904	9.48652	9.63804	noncoding	uc.427+	uc.427	UCR	215	chr18	+	24237198	24237413		GTCAGATCTTACCTGAAACATTGAAGCACAAAGTCTCTCTCCAAGTCCCCTTTTCCTTTT	intergenic
ASHG19A3A032017	1417.36	1700.13	10.3812	10.8176	noncoding	ENST00000392497	AL139098.3	Ensembl	249	chr6	+	121729687	121729940		AAAGCTGATTCTGGCAAGGAGGGGAATAACCTTCCAGAAAATGCAGATGCCAAAACAGAC	intergenic
ASHG19A3A025486	401.105	288.269	8.55673	8.25797	noncoding	AK094991		misc_RNA	2342	chr4	+	47430468	47432807		GTAAATTCTGTACATAGTTCATTGACCCTGTTGTGTGGTGGTCCTCAGCTTTGGGTGGAT	intergenic
ASHG19A3A054205	3300.73	1906.85	11.6134	10.9915	noncoding	AK096317		NRED	1993	chr16	+	2694129	2696122	NR_024492,	TTTAAAAGCACTTTTAAGCATCAATTGTGAAATAAAAAGCCCGAGCAAAAGCCCTCTTTG
ASHG19A3A033232	145.837	93.7202	7.10464	6.62263	noncoding	ENST00000455459	GS1-259H13.7	Ensembl	526	chr7	-	99235864	99236390		AGTGACTTACAAAAATGTCAAGTTCAACATATGGGATGTGGGTGGCCAGGACAAGATCCG	intergenic
ASHG19A3L0002168	464.444	383.771	8.7647	8.67633	noncoding	AK074467		misc_RNA	2310	chr8	+	95999108	96001394		AGTTTCATTCCCTATTCAAAAATGTCTTAGGCAAATGTGTGGGAATGAACATGCACTTTA	intergenic
ASHG19A3A008104	689.079	814.313	9.33799	9.76001	noncoding	HIT000389890		H-invDB	326	chr17	-	26700694	26701019		TTTTAACCTTGAGATATAGCAGTACTGTTTGCATCTTGCAACCCTCCTCTCCTTGGGCTG	intronic antisense	NM_015077	SARM1	sterile alpha and TIR motif-containing protein	+	26698986	26728065
ASHG19A3A051854	926.311	1014.13	9.76583	10.0713	noncoding	NR_024396	MGC23270	RefSeq_NR	2518	chr14	+	105287537	105290055		AGCATTTTCATGGATTACAAATGTCTTAGCCCCTGCCCTTTCAAGCAGTTCCTTAGCTCC	intergenic
ASHG19A3A014035	133.651	86.2174	6.98052	6.5019	noncoding	BC018776		misc_RNA	1612	chr2	-	96190857	96192450		ATGGTCTTCAGTGCCTACTGAGAAGGGTTCCTGGACATCATCAGGTATGAAAACCTCAAA	intergenic
ASHG19A3A047181	138.991	120.271	7.03504	6.99341	noncoding	ENST00000415549	RP4-650F12.4	Ensembl	382	chr1	-	74832266	74844486		GACATTTTCCTATGTACCTTGCATCCAACTGTGGCCTTGCGACATATTTTCATGAAGGGA	natural antisense	NM_001199327	FPGT-TNNI3K	FPGT-TNNI3K fusion protein isoform b	+	74663895	74930609
ASHG19A3A047181	138.991	120.271	7.03504	6.99341	noncoding	ENST00000415549	RP4-650F12.4	Ensembl	382	chr1	-	74832266	74844486		GACATTTTCCTATGTACCTTGCATCCAACTGTGGCCTTGCGACATATTTTCATGAAGGGA	natural antisense	NM_015978	TNNI3K	serine/threonine-protein kinase TNNI3K	+	74701070	75010116
ASHG19A3A047181	138.991	120.271	7.03504	6.99341	noncoding	ENST00000415549	RP4-650F12.4	Ensembl	382	chr1	-	74832266	74844486		GACATTTTCCTATGTACCTTGCATCCAACTGTGGCCTTGCGACATATTTTCATGAAGGGA	natural antisense	NM_001112808	FPGT-TNNI3K	FPGT-TNNI3K fusion protein isoform a	+	74663895	75010116
ASHG19A3A048496	568.755	644.613	9.05168	9.4245	noncoding	AL117598		misc_RNA	2367	chr12	+	32534219	32536566		CCAGAAGCCAATATATCGATTCTTATATCTCGGTTTATGTTACCAACTGAATATGGTGTA	intergenic
ASHG19A3A020270	137.741	150.171	7.02159	7.31589	noncoding	ENST00000437071	CTA-211A9.5	Ensembl	1006	chr22	+	27068767	27176170		TTTGCTGCAAGAGGATGGAAAGGATCACTGTGATTTTGTTTTTCTCCTGCTGCTCTGTCT	intergenic
ASHG19A3A022416	102595	110966	16.6535	16.7488	noncoding	ENST00000396544	AC104306.1	Ensembl	369	chr3	+	32549446	32549817	NM_000993,ENST00000413849,ENST00000395150,ENST00000393325,	ACCTATGTACCGGTTACCACTTTCAAAAATCTACAGACAGTCAATGTGGATGAGAACTAA	intergenic
ASHG19A3A009319	133.139	130.12	6.97465	7.10771	noncoding	BC033139		misc_RNA	1079	chr17	+	27078189	27079232		TCAAATTGACTTACTTATCTAGGGAGAAATGGGGCCCTCCTGCCTAGGTGAGAAACTAGA	intergenic
ASHG19A3A009606	4627.43	8514.88	12.1026	13.128	noncoding	ENST00000514828	AC091132.1	Ensembl	429	chr17	+	43594141	43594671	uc010wkm.1,ENST00000510581,ENST00000508811,	ATGCCAAGATGAGTTTGTCAGTATAGCCGTATCCTGGAACTTCTTTTGTGAGCTAAAAAA	intergenic
ASHG19A3A033062	134.874	152.183	6.9923	7.33353	noncoding	ENST00000434531	AC005522.7	Ensembl	453	chr7	-	76601995	76606278		CAACATTTAGTAACCAACATCAAATGTACTTGTCTCTCCTAAGCTGCACAGACTGCCAAG	intergenic
ASHG19A3A021874	53.9069	68.9576	5.66752	6.18828	noncoding	ENST00000497285	RP11-774I5.1	Ensembl	483	chr3	-	161534696	161539696		TTTAGAATCACCCACTCAAGTTGACACCAATTCTGAATGGTGAGGTCTCACCCTTCTTAT	intergenic
ASHG19A3A035657	10364.9	17064	13.2708	14.1322	noncoding	BC012900		misc_RNA	2118	chr8	-	29190579	29192682		CATCTTTCAGAGTGATACCATTTCTACATTTGATAATGCCTGTATTCCTGTAGGATGTAT	exon sense-overlapping	NM_001394	DUSP4	dual specificity protein phosphatase 4 isoform	-	29190578	29208267
ASHG19A3A035657	10364.9	17064	13.2708	14.1322	noncoding	BC012900		misc_RNA	2118	chr8	-	29190579	29192682		CATCTTTCAGAGTGATACCATTTCTACATTTGATAATGCCTGTATTCCTGTAGGATGTAT	exon sense-overlapping	NM_057158	DUSP4	dual specificity protein phosphatase 4 isoform	-	29190578	29206322
ASHG19A3A043812	215.456	229.73	7.66869	7.92671	noncoding	ENST00000425494	RP11-175J10.1	Ensembl	1454	chr10	+	37811938	37833629		TTGAATGTTCCAGTGCTCCCATGTCTACCATAAATCATGCGTTTTCATCCTCAGAAGCAG	intergenic
ASHG19A3A012736	192.813	203.043	7.50799	7.75064	noncoding	ENST00000424872	RP11-293G6__B.6	Ensembl	1797	chr1	-	235701348	235703145		TAACGAAAATAACCCCTTCCTAATTAAACACCTAACAATCAGCAGCATCTTCGCCGGATT	intergenic
ASHG19A3A046148	246.086	323.272	7.85723	8.42641	noncoding	uc001mjl.1	BC014360	UCSC_knowngene	1068	chr11	+	10879805	10900820		GTGCTTTAACACCAAATCTGAAAATTGTTCAGAAGAGAAACATTGAGCATGAACACCATC	bidirectional	NM_021211	ZBED5	zinc finger BED domain-containing protein 5	-	10874250	10879620
ASHG19A3A046148	246.086	323.272	7.85723	8.42641	noncoding	uc001mjl.1	BC014360	UCSC_knowngene	1068	chr11	+	10879805	10900820		GTGCTTTAACACCAAATCTGAAAATTGTTCAGAAGAGAAACATTGAGCATGAACACCATC	bidirectional	NM_001143667	ZBED5	zinc finger BED domain-containing protein 5	-	10874250	10879620
ASHG19A3A000132	170.241	207.265	7.32687	7.78156	noncoding	ENST00000419303	PRAMEL	Ensembl	1869	chr22	-	22345495	22398256		GAACAGAGGAGGCAGGCACAGAGAGGTCCATGGAGGTGAACCACCCAGCACCCCTCAGCC	intergenic
ASHG19A3A031015	33621	27932.2	14.9832	14.8268	noncoding	ENST00000397300	RP11-401E14.1	Ensembl	534	chr6	+	15935012	15935548	NM_005719,ENST00000437218,	AAACCCAGCAAGTGGTGGGCTTGCTTTGTGAAGAGACAGTTCATGAACAAGAGTCTTTCA	intergenic
ASHG19A3A039449	1895.43	2161.32	10.8028	11.1703	noncoding	AK021425		misc_RNA	1832	chr1	+	210417766	210419598		GATGGTTTAAACTAGGTGCAGAACTGTCCCATGAAGAGAAGAATGATATCAGTATTTAAA	intergenic
ASHG19A3A031531	1156	1217.51	10.0911	10.3385	noncoding	AK096036		misc_RNA	2642	chr6	+	42750664	42753300		ACATACAGGCTTCTAGGTCTAGCCAGGCCATCTAGTTTAGTCAAGACAGCTGTGTAACAA	intergenic
CUST_4_PI426073487	129.348	188.51	6.93576	7.64034	noncoding	uc.4+	uc.4	UCR	359	chr1	+	10758248	10758607		GGGTCCCGGTAATCAAATAAAATTGAAAATCATCTTCCCATTAAATTCAATTAGCCGCAA	intronic antisense	NM_017766	CASZ1	zinc finger protein castor homolog 1 isoform b	-	10707269	10856707
CUST_4_PI426073487	129.348	188.51	6.93576	7.64034	noncoding	uc.4+	uc.4	UCR	359	chr1	+	10758248	10758607		GGGTCCCGGTAATCAAATAAAATTGAAAATCATCTTCCCATTAAATTCAATTAGCCGCAA	intronic antisense	NM_001079843	CASZ1	zinc finger protein castor homolog 1 isoform a	-	10696665	10856707
ASHG19A3A021314	74.5541	77.3971	6.14157	6.35429	noncoding	BC018424		RNAdb	3519	chr3	-	88185088	88188592		GCACAACCACATATTTCAACACAAATTTGCAAGCCTTCTTCTTCAACCTGTAAAAAGAAA	natural antisense	NM_018293	ZNF654	zinc finger protein 654	+	88188261	88193814
ASHG19A3A021314	74.5541	77.3971	6.14157	6.35429	noncoding	BC018424		RNAdb	3519	chr3	-	88185088	88188592		GCACAACCACATATTTCAACACAAATTTGCAAGCCTTCTTCTTCAACCTGTAAAAAGAAA	intron sense-overlapping	NM_001195308	CGGBP1	CGG triplet repeat-binding protein 1	-	88101099	88199016
ASHG19A3A029186	317.199	196.059	8.2225	7.69827	noncoding	ENST00000514034	CTC-251I16.1	Ensembl	1154	chr5	+	175136605	175137759		GTGGGACCCCAAATCCATGTTTGTGTTACCATCGTGTTCCAATAAAACTATCGAAACAGA	intergenic
ASHG19A3A027828	223.759	345.668	7.72184	8.5241	noncoding	ENST00000507432	AC138035.2	Ensembl	2386	chr5	-	180756043	180758857	HIT000047146,ENST00000502609,ENST00000457191,ENST00000455800,ENST00000447359,ENST00000444451,ENST00000443330,ENST00000434745,ENST00000432801,ENST00000432723,ENST00000425003,ENST00000424045,ENST00000422015,ENST00000420675,ENST00000418553,ENST00000416803,ENST00000406017,	TTTCCTCCCAATGGATCCTGCCACCTTCTGGTGCAAGAGACCTGAAAGTGTGGGCGACCT	intergenic
ASHG19A3A051349	62775.5	65177.1	15.9176	16.006	noncoding	ENST00000480072	RP11-829H16.1	Ensembl	201	chr14	+	31288919	31289120		AAGTTTGAAAAGAGGTACAAGACAGGCAAGAACAAGTGGTTCTTCCAGGACCTAGATTTT	intergenic
ASHG19A3A040937	1596.4	1582.94	10.5551	10.7136	noncoding	ENST00000453735	RP11-344N17.6	Ensembl	523	chrX	+	48166203	48168490	ENST00000457562,ENST00000448031,ENST00000413071,	AAATGTCAGACCTGATATAGTCCTCCTTGGAAAGGCCTTTTCTGAGGGCTGATACTCTGT	intergenic
ASHG19A3A039520	122552	123258	16.9246	16.8889	noncoding	HIT000195205		H-invDB	337	chrM	+	15552	15888		ACAATCCTAATCCTAATACCAACTATCTCCCTAATTGAAAACAAAATACTCAAATGGGCC	intergenic
ASHG19A3L0001450	145.221	203.205	7.09705	7.75205	noncoding	chr4:114709776-114720551-	lincRNA-CAMK2D	lincRNA	10776	chr4	-	114709776	114720551		CTCTTGTCTGTCTCTGAATTCACCCTCATATTAATCAGAATCACTTTATTCCTAGAGTAT	intergenic
ASHG19A3A053011	15167.4	19053.2	13.8168	14.2984	noncoding	ENST00000395459	AC107871.1	Ensembl	270	chr15	+	68546970	68547242	ENST00000395520,	AATGGAGATGCCCAAACAGACCAGACACAGAAAGCTGAAGGTGCTGCAGATGCCAAGTGA	intergenic
ASHG19A3A013545	740.24	252.213	9.44148	8.06243	noncoding	AK126362		misc_RNA	2241	chr2	-	42558384	42560624		GCCCAAAAGAGTAGGATAGCCACATTAGACTTACAAGACTTACAGCAACTCCACCAGAAA	natural antisense	NM_001145076	EML4	echinoderm microtubule-associated protein-like 4	+	42396489	42559688
ASHG19A3A013545	740.24	252.213	9.44148	8.06243	noncoding	AK126362		misc_RNA	2241	chr2	-	42558384	42560624		GCCCAAAAGAGTAGGATAGCCACATTAGACTTACAAGACTTACAGCAACTCCACCAGAAA	natural antisense	NM_019063	EML4	echinoderm microtubule-associated protein-like 4	+	42396489	42559688
ASHG19A3A053500	53641.3	53004.4	15.6951	15.7074	noncoding	ENST00000463867	CTD-2135D7.1	Ensembl	348	chr16	-	14016188	14016536	NR_002309,ENST00000469206,	TGTGCAATTCACAACAAAGTAGTCAGGAATCGATCTTGTGAAGCCTGCAAGGACCGAACA	intronic antisense	NM_005236	ERCC4	DNA repair endonuclease XPF	+	14014013	14046205
ASHG19A3A051990	207.451	153.188	7.61246	7.34356	noncoding	AK022275		misc_RNA	1882	chr15	-	35619557	35621439		AGGGGCTGCTCACTCTAAAGTTACTCAAAATACTCTATTTATCTAACAAAGCATGGGCTT	intergenic
ASHG19A3A027931	176.017	105.879	7.37503	6.80328	noncoding	HIT000062015		H-invDB	209	chr5	+	9199553	9199761		GACCTGCAGCCACCTGTTCCAATCTGGCTTCTATCAGCAATCAAGGTAATAACTTACAAG	intronic antisense	NM_003966	SEMA5A	semaphorin-5A precursor	-	9035137	9546233
ASHG19A3A040716	170.674	98.6757	7.3308	6.69703	noncoding	AF086422		misc_RNA	381	chrX	+	16607671	16627697		TTCCAACTCAGCTATCCTTGGCTCTGAAAAGCTGTCATCACTGGCATCACTGTATCTATC	natural antisense	NM_019857	CTPS2	CTP synthase 2	-	16606121	16731059
ASHG19A3A040716	170.674	98.6757	7.3308	6.69703	noncoding	AF086422		misc_RNA	381	chrX	+	16607671	16627697		TTCCAACTCAGCTATCCTTGGCTCTGAAAAGCTGTCATCACTGGCATCACTGTATCTATC	natural antisense	NM_001144002	CTPS2	CTP synthase 2	-	16606121	16730340
ASHG19A3A040716	170.674	98.6757	7.3308	6.69703	noncoding	AF086422		misc_RNA	381	chrX	+	16607671	16627697		TTCCAACTCAGCTATCCTTGGCTCTGAAAAGCTGTCATCACTGGCATCACTGTATCTATC	natural antisense	NM_175859	CTPS2	CTP synthase 2	-	16606121	16730775
CUST_112_PI426075208	200.446	196.358	7.56066	7.70061	noncoding	nc-HOXC11-110+	nc-HOXC11-110	HOX cluster	838	chr12	-	54359624	54360462		GAAAAAGAGAGAAAAGTTTCCCGGAGTCTTCATTAGTTGATTTCCCTGTCCGCCGCTTTC	intergenic
ASHG19A3A037924	269.721	347.152	7.99381	8.5301	noncoding	ENST00000439875	C9orf110	Ensembl	7380	chr9	-	115865617	115873753	ENST00000434051,	TAGGCACCTCCTTCCCTTAGGAAGAAGCCAAACATTTCACGAAGTCCTTCTGTGCTTTTA	intergenic
ASHG19A3A049938	112.317	123.147	6.73762	7.02851	noncoding	ENST00000445646	RP11-363G2.4	Ensembl	533	chr13	+	23426134	23426991		TGGTGTTGGGGGCAATAGGTTTGTGAATATTCTGTGGATATGTCCATGCATAGGTGTATA	intergenic
ASHG19A3A030636	149.707	154.603	7.14476	7.35625	noncoding	ENST00000454588	RP1-45I4.3	Ensembl	552	chr6	-	143360561	143363461		GGTCCAAGTCAATCATCTTTGCTTCTCTCACATTGTCATCGACATTTACCCCAGCATTAT	intergenic
ASHG19A3L0003378	116.085	97.8986	6.78224	6.68541	noncoding	BF116112	lincRNA-C5orf53-1	lincRNA	588	chr5	-	139527790	139528378		AATGTCTGTGTCCCCTATAAACCATGACTCTACACGGTGGCATTCTAAGGATGGCAGAAT	intergenic
ASHG19A3A020928	5684.48	4572.81	12.3897	12.2366	noncoding	ENST00000434712	RP11-193I22.2	Ensembl	514	chr3	-	42092672	42093186		AGCTATCAGGATCTACAACAATGACAGATATGATGAGATCTGCACTGCTGGGGAGGCAAT	intergenic
ASHG19A3A036568	481.925	324.526	8.81924	8.43207	noncoding	AK026601		misc_RNA	1700	chr8	+	41685789	41687453		CACTAGGGGAGCTCATTGTCTAAGACTGCCATCCCTAACTGCCTTTTAAAAAGAAATCTG	intronic antisense	NM_001142446	ANK1	ankyrin-1 isoform 9	-	41510743	41754280
ASHG19A3A053282	80930.8	89254.1	16.3025	16.4309	noncoding	ENST00000465747	RP11-522B15.1	Ensembl	340	chr15	+	96991383	96991723		TTTGGTTACCTATGTACCTGTTACCACGTGAAAAAATCTACAGTCAATGTGGATGAGAAC	intergenic
ASHG19A3A015223	75807.7	92471.1	16.2067	16.4712	noncoding	ENST00000425872	RP3-477M7.4	Ensembl	743	chr1	+	8953467	8954210	uc002eea.2,	TTGTGGTGTGGAAAAACAAATTTGTTTTTATGTCCTCTTCTCCCTTTCCATCTTTCAGCA	intergenic
ASHG19A3L0001775	108.723	90.546	6.69209	6.56946	noncoding	chr6:23664596-23678671+	lincRNA-NRSN1-2	lincRNA	14076	chr6	+	23664596	23678671		TCCTATGCTAAATGTCTTCCTTCACATGTGCTAACATTCTGTATTCATTGCAGGATATCA	intergenic
ASHG19A3A008649	17147.1	16686.3	13.9944	14.0901	noncoding	BC040714		misc_RNA	1546	chr17	-	58118818	58120351		GAATCTTGGAACTTCCGTCTCTTGAATACATTCTTAGTAGTAGCTTCTTGGCATTTTCAA	intergenic
ASHG19A3A029808	169.205	105.41	7.31736	6.79657	noncoding	AK026168		NRED	2638	chr6	-	34247460	34250085		AGCTAAAGCAGTGACAGATCCACGTAGCCTCTTTAACCTCTTTATTATCTTGCCAAAAAA	intergenic
ASHG19A3A014717	1349.79	1234.22	10.3108	10.3573	noncoding	AK026877		misc_RNA	1573	chr2	-	181891254	181892811		TTCACCCCTCTCTCACTTTCTGTTTCCTCAGCCTTTGGAAAGCATGTATCAAGGATTTAA	intronic antisense	NM_006357	UBE2E3	ubiquitin-conjugating enzyme E2 E3	+	181845341	181928150
ASHG19A3A014717	1349.79	1234.22	10.3108	10.3573	noncoding	AK026877		misc_RNA	1573	chr2	-	181891254	181892811		TTCACCCCTCTCTCACTTTCTGTTTCCTCAGCCTTTGGAAAGCATGTATCAAGGATTTAA	intronic antisense	NM_182678	UBE2E3	ubiquitin-conjugating enzyme E2 E3	+	181845111	181928150
ASHG19A3A036612	5938.34	6814.5	12.4519	12.8126	noncoding	ENST00000471393	RP11-400K9.1	Ensembl	478	chr8	+	54445467	54446264		ACAAAGGGAAAGAGGAGAGACACCTGACCCGTGTTCTCTAGGCCTTTTAGAAGACATGGA	intergenic
ASHG19A3A053034	3393.07	1450.47	11.65	10.5901	noncoding	AK022441		NRED	3537	chr15	+	71595109	71598646		TGTGAAGATAACTTTTTCCCTCAAACGATTGTAAAGAGCTTAAAGGCATTAAGATGAGAG	intron sense-overlapping	NM_024817	THSD4	thrombospondin type-1 domain-containing protein	+	71433787	72075722
ASHG19A3A041484	35552	37268.7	15.0743	15.2372	noncoding	ENST00000450755	MIR220A	Ensembl	1325	chrX	+	122695492	122696817	NM_006087,	AACATGAATGACCTGGTATCTGAGTACCAGCAGTACCAGGATGCCACAGCCGAGGAGGGC	intergenic
ASHG19A3A030207	1049.51	1103.97	9.95324	10.195	noncoding	ENST00000454172	RP1-90L14.1	Ensembl	411	chr6	-	85130748	85265870		GCTCTGCTCTGTCCTCACCCCTCAAGAGAATTTCCCTTATTATTATGAAAACTTTTTATC	intergenic
CUST_75_PI426073487	1030.54	973.862	9.9265	10.0127	noncoding	uc.77+	uc.77	UCR	296	chr2	+	145185764	145186060		TTATCTTTCAAGCATCTTTGGCTGAGTTCTCCCTCATAGTTGAAAATCTAAAACCTTAAG	intronic antisense	NM_001171653	ZEB2	zinc finger E-box-binding homeobox 2 isoform 2	-	145141941	145277958
CUST_75_PI426073487	1030.54	973.862	9.9265	10.0127	noncoding	uc.77+	uc.77	UCR	296	chr2	+	145185764	145186060		TTATCTTTCAAGCATCTTTGGCTGAGTTCTCCCTCATAGTTGAAAATCTAAAACCTTAAG	intronic antisense	NM_014795	ZEB2	zinc finger E-box-binding homeobox 2 isoform 1	-	145141941	145277958
ASHG19A3A035847	173.344	214.75	7.35339	7.83152	noncoding	ENST00000500152	AL359853.1	Ensembl	1760	chr1	+	179836661	179846917		TTAAATCGTAAAACTGTTAGTATCAGGAGAGCCCTTCGAGTATTCTCTCCGCTCCACACC	natural antisense	NM_145034	TOR1AIP2	torsin-1A-interacting protein 2 isoform b	-	179809101	179846941
ASHG19A3A035847	173.344	214.75	7.35339	7.83152	noncoding	ENST00000500152	AL359853.1	Ensembl	1760	chr1	+	179836661	179846917		TTAAATCGTAAAACTGTTAGTATCAGGAGAGCCCTTCGAGTATTCTCTCCGCTCCACACC	natural antisense	NM_022347	TOR1AIP2	interferon alpha responsive protein isoform a	-	179828164	179846941
ASHG19A3A035847	173.344	214.75	7.35339	7.83152	noncoding	ENST00000500152	AL359853.1	Ensembl	1760	chr1	+	179836661	179846917		TTAAATCGTAAAACTGTTAGTATCAGGAGAGCCCTTCGAGTATTCTCTCCGCTCCACACC	natural antisense	NM_001199260	TOR1AIP2	torsin-1A-interacting protein 2 isoform b	-	179809101	179846941
ASHG19A3L0001145	209.093	199.315	7.62508	7.72288	noncoding	AI760638	lincRNA-PTH2R-1	lincRNA	500	chr2	-	209407667	209689050		GCAATTCTCTTGTCCTTCTCATGGTGTCAAGCTGGCTGTAGCAGGTATCTTATCCATACA	intergenic
ASHG19A3A034053	323.722	371.107	8.25164	8.62964	noncoding	CR933627		misc_RNA	3185	chr7	+	23253693	23279376		TGATACTCACTTTCCATAAAAATCAGGCACAACCCTGTACCCTTGCCCACTGGAGTTTGT	intergenic
ASHG19A3A018332	68515.7	71948.6	16.0541	16.1518	noncoding	ENST00000464473	PPIAL	Ensembl	501	chr20	+	41859399	41859900		TCCAGGAATGGCAAGACCAGCAAGAAGATAATCATTGCTGACTGCAGACAACTTCGATAA	intergenic
ASHG19A3A053503	144.102	207.777	7.08553	7.78479	noncoding	uc002dck.1	CR593775	UCSC_knowngene	518	chr16	-	14456965	14464123		AACTGGTACATCTAATGCAGCACAAAGCTCAGACCGCCAAGACTGGGAACGGGGACCCCA	intergenic
ASHG19A3A038356	19396.7	17372.6	14.1672	14.1608	noncoding	ENST00000391389	RP11-134K1.2	Ensembl	531	chr9	+	8713310	8713841		AAGAAAATGAAGAAGTCTTCAGGGGAGACTGTCTACTGTGGTCAGGTGTTTGAGAAGTCC	intronic antisense	NM_001171025	PTPRD	receptor-type tyrosine-protein phosphatase delta	-	8314245	8733946
ASHG19A3A038356	19396.7	17372.6	14.1672	14.1608	noncoding	ENST00000391389	RP11-134K1.2	Ensembl	531	chr9	+	8713310	8713841		AAGAAAATGAAGAAGTCTTCAGGGGAGACTGTCTACTGTGGTCAGGTGTTTGAGAAGTCC	intronic antisense	NM_001040712	PTPRD	receptor-type tyrosine-protein phosphatase delta	-	8314245	8733946
ASHG19A3A038356	19396.7	17372.6	14.1672	14.1608	noncoding	ENST00000391389	RP11-134K1.2	Ensembl	531	chr9	+	8713310	8713841		AAGAAAATGAAGAAGTCTTCAGGGGAGACTGTCTACTGTGGTCAGGTGTTTGAGAAGTCC	intronic antisense	NM_002839	PTPRD	receptor-type tyrosine-protein phosphatase delta	-	8314245	10612723
ASHG19A3A038356	19396.7	17372.6	14.1672	14.1608	noncoding	ENST00000391389	RP11-134K1.2	Ensembl	531	chr9	+	8713310	8713841		AAGAAAATGAAGAAGTCTTCAGGGGAGACTGTCTACTGTGGTCAGGTGTTTGAGAAGTCC	intronic antisense	NM_130391	PTPRD	receptor-type tyrosine-protein phosphatase delta	-	8314245	8733946
ASHG19A3A038356	19396.7	17372.6	14.1672	14.1608	noncoding	ENST00000391389	RP11-134K1.2	Ensembl	531	chr9	+	8713310	8713841		AAGAAAATGAAGAAGTCTTCAGGGGAGACTGTCTACTGTGGTCAGGTGTTTGAGAAGTCC	intronic antisense	NM_130393	PTPRD	receptor-type tyrosine-protein phosphatase delta	-	8314245	8733946
ASHG19A3A038356	19396.7	17372.6	14.1672	14.1608	noncoding	ENST00000391389	RP11-134K1.2	Ensembl	531	chr9	+	8713310	8713841		AAGAAAATGAAGAAGTCTTCAGGGGAGACTGTCTACTGTGGTCAGGTGTTTGAGAAGTCC	intronic antisense	NM_130392	PTPRD	receptor-type tyrosine-protein phosphatase delta	-	8314245	8733946
ASHG19A3A038131	3655.02	3398.97	11.7607	11.8051	noncoding	uc004cas.1	LQFBS-1	UCSC_knowngene	2713	chr9	-	134372865	134375578		AGTTACTTCAGCAGTTCCTAAGATGCTCCTTCCCCATGTTCTACACTAGACACAGAGCTT	natural antisense	NM_013318	PRRC2B	protein PRRC2B	+	134305476	134375575
ASHG19A3A037600	1627.43	1606.61	10.581	10.7339	noncoding	ENST00000505936	AL353710.1	Ensembl	1751	chr9	-	79808707	79810652		AGGACACCGTCACCCACAGCCTCCCCCGACGGCTTTTCCAATGTATATGCAGGCCTTACC	intronic antisense	NM_001018037	VPS13A	vacuolar protein sorting-associated protein 13A	+	79792360	80032399
ASHG19A3A037600	1627.43	1606.61	10.581	10.7339	noncoding	ENST00000505936	AL353710.1	Ensembl	1751	chr9	-	79808707	79810652		AGGACACCGTCACCCACAGCCTCCCCCGACGGCTTTTCCAATGTATATGCAGGCCTTACC	intronic antisense	NM_015186	VPS13A	vacuolar protein sorting-associated protein 13A	+	79792360	80000106
ASHG19A3A037600	1627.43	1606.61	10.581	10.7339	noncoding	ENST00000505936	AL353710.1	Ensembl	1751	chr9	-	79808707	79810652		AGGACACCGTCACCCACAGCCTCCCCCGACGGCTTTTCCAATGTATATGCAGGCCTTACC	intronic antisense	NM_033305	VPS13A	vacuolar protein sorting-associated protein 13A	+	79792360	80032399
ASHG19A3A037600	1627.43	1606.61	10.581	10.7339	noncoding	ENST00000505936	AL353710.1	Ensembl	1751	chr9	-	79808707	79810652		AGGACACCGTCACCCACAGCCTCCCCCGACGGCTTTTCCAATGTATATGCAGGCCTTACC	intronic antisense	NM_001018038	VPS13A	vacuolar protein sorting-associated protein 13A	+	79792360	79997921
ASHG19A3A007466	64.5819	78.4806	5.93438	6.37272	noncoding	NR_027077	LOC283761	RefSeq_NR	1368	chr15	-	90048161	90067265		TAGCATAAGACCTGGCTTGTGACAGATCTGCCACCCTCTAGCTGGGTGACTTTTAGACAA	intergenic
ASHG19A3A010126	174.37	161.028	7.3617	7.41575	noncoding	ENST00000400144	AP005380.2	Ensembl	366	chr18	-	5132780	5133150		TTATTTCTCAGACAGTGGATCCAAAATTAAACCACATCCTCAGGCCACCAGTGGAAGGAG	intergenic
ASHG19A3L0001046	137.77	159.703	7.02231	7.40445	noncoding	exon2235-	lincRNA-INHBB-4	lincRNA	102	chr2	-	121155131	121155232		GTCCGTTTCCCTGCTCTTCACCAAGGGCTGGCCTAGGTCAGGCACCGAGCTGGGAGCTGG
ASHG19A3A037645	113.559	88.842	6.7516	6.54414	noncoding	ENST00000447148	RP11-202I11.2	Ensembl	429	chr9	-	88370956	88380027	ENST00000421734,	ATCACTCAAGTGATCCATCATACAGCACCTCCAGTTCCAAAGAATACTGACTTACTTCAG	intergenic
ASHG19A3A007338	105.312	122.81	6.6464	7.02391	noncoding	NR_024538	GSTM4	RefSeq_NR	1359	chr1	+	110198697	110204330		CAAGCTGGGCCTGGACTTTCCCAATGTGGGGAGACAGAAGAGGAGAAGATTCGTGTGGAC	exon sense-overlapping	NM_000850	GSTM4	glutathione S-transferase Mu 4 isoform 1	+	110198697	110204331
ASHG19A3A007338	105.312	122.81	6.6464	7.02391	noncoding	NR_024538	GSTM4	RefSeq_NR	1359	chr1	+	110198697	110204330		CAAGCTGGGCCTGGACTTTCCCAATGTGGGGAGACAGAAGAGGAGAAGATTCGTGTGGAC	exon sense-overlapping	NM_147148	GSTM4	glutathione S-transferase Mu 4 isoform 2	+	110198697	110208123
ASHG19A3A032717	345.163	342.701	8.33848	8.51018	noncoding	uc003thg.2	CR606158	UCSC_knowngene	1572	chr7	-	39893287	39894859		GAACAGTCACTCCATAGTGCAATCCATATTAATAGCCTTCTTATCTTAAGTCTTCATCTC	intergenic
ASHG19A3A026160	265.252	216.758	7.97072	7.84567	noncoding	uc003imn.2	BC035179	UCSC_knowngene	2650	chr4	+	152877142	152890531		GCCCCACGCTCTGGTTTCTATCCCACGTACTGTATTTAATTTTAGCAAAATCCTAGTAAA	intergenic
ASHG19A3A039003	1427.01	1729.9	10.39	10.8486	noncoding	ENST00000395253	RP11-520B13.7	Ensembl	773	chr9	+	99883940	99884713	NM_001037163,	AGATAACACTGGGGTTACTGGCTCTGCAACATTTTGAATTAGCAAATTCATTATGCCATA	intergenic
ASHG19A3A012995	5962.62	20767.7	12.4575	14.4201	noncoding	uc001hyk.1	BC133032	UCSC_knowngene	316	chr1	-	237167402	237167718	NM_005951,ENST00000464121,	AGTGCAAAAAGTGCAAATGCACCTCCTGCAAGAAGAGCTGCTGCTCCTGTTGCCCCCTGG	intergenic
ASHG19A3A019559	124.814	146.996	6.88467	7.28278	noncoding	BC127773		misc_RNA	425	chr22	-	23587586	23587990		TTGCATCCACGCCAAGTGCCTCAAAATTCTTTATAAATGAGACGTGCCCCATCCAGTTAG	intronic antisense	NM_021574	BCR	breakpoint cluster region protein isoform 2	+	23522551	23660224
ASHG19A3A019559	124.814	146.996	6.88467	7.28278	noncoding	BC127773		misc_RNA	425	chr22	-	23587586	23587990		TTGCATCCACGCCAAGTGCCTCAAAATTCTTTATAAATGAGACGTGCCCCATCCAGTTAG	intronic antisense	NM_004327	BCR	breakpoint cluster region protein isoform 1	+	23522551	23660224
ASHG19A3A027345	3766.83	1824.43	11.8046	10.9265	noncoding	NR_015360	FLJ33630	RefSeq_NR	2977	chr5	-	127357245	127418766		GAGCCAATACACTGAGGTCACTGGATAAATAAACAGATTCTTGCAAGTGCTTTGGAAATG	bidirectional	NM_001046	SLC12A2	solute carrier family 12 member 2	+	127419482	127525380
ASHG19A3H0000038	110.844	93.1757	6.71771	6.61456	noncoding	nc-HOXA9-79-	nc-HOXA9-79	HOX cluster	248	chr7	-	27209027	27209275		TTGTTGGGATCCACCTTTCTCTCGACAGCACGACACTGCCTTCATTACTTCAGTTGAAAT	intergenic
ASHG19A3A017833	261.075	244.042	7.94437	8.01361	noncoding	NR_027042	MDS2	RefSeq_NR	1027	chr1	+	23953823	23967056		TTTCATGGTGTCTGCTTAATGTTAATCTCTCCAAGCTTCCCACCAGACTGCAAAGGCTGA	intergenic
ASHG19A3A013487	138.573	128.261	7.03038	7.08829	noncoding	ENST00000431951	AC068274.1	Ensembl	384	chr2	-	35949824	35950208		AAATTTGATGAACTTGATGCCAATAATCTGCCTCTCAATTTGAAAACCACCTGAAGTTAC	intergenic
ASHG19A3A014042	1048.25	2981.23	9.95146	11.6174	noncoding	uc002sva.1	DKFZp667P0924	UCSC_knowngene	2442	chr2	-	96523056	96610442	NM_025190,NM_025190,NM_001164315,NM_001164315,	AGAAAGTTTCTCTTTTGAATATTGCCACAAGAATAACGGGCGGTGGGAAATCTGGAACAG	intergenic
ASHG19A3L0000384	199.198	207.845	7.55148	7.78514	noncoding	chr11:44557524-44573924-	lincRNA-ALX4	lincRNA	16401	chr11	-	44557524	44573924		GTATAAGCACCCAGCACCTTACATACATATTGCTAGATCCTTTCTTTTCTCTCTCTATCT	intergenic
ASHG19A3A032328	140.67	115.203	7.05242	6.92705	noncoding	ENST00000455390	RP11-514O12.2	Ensembl	627	chr6	+	167317185	167318323		TTGCGGTTTCTTCCTTGCTCCTTGCAGGTTATATTTGAAATGAATGTCAGAGCCATGCGG	intergenic
ASHG19A3A048980	194.071	159.116	7.51671	7.39805	noncoding	uc001dva.2	BC043293	UCSC_knowngene	1824	chr1	-	106144775	106161557		ATCGTCTGCTCCAGACAACAGCCTTTCCCTAGTTTATACCATTAACATTTTATTAATGGT	intergenic
ASHG19A3A031845	1031.83	1137.79	9.92853	10.2394	noncoding	ENST00000404337	KRT18P50	Ensembl	1243	chr6	+	96438982	96440225		AGGATAGTGGACGGCAAAGTAGCATCTCCCACCAATGACACTAAAGTTCTGAGGTTTTGA	intergenic
ASHG19A3A017032	105.842	166.82	6.65354	7.46703	noncoding	uc002vnc.2	LOC440934	UCSC_knowngene	826	chr2	+	223185412	223186440		TAATGAAAACAGAAGATCAACTGGACCGGGTAGCAAGAAATAAGGCTTAAGAAGCACTGG	intergenic
ASHG19A3A041225	48104.3	56569.8	15.5174	15.8078	noncoding	ENST00000438336	RP11-475D8.3	Ensembl	660	chrX	+	78018722	78019382		ACCTATTTTGTAGAAGGTGAAGATGCTGGCAACAGGAGGACTAGATCAACAGTTTTATTA	intergenic
ASHG19A3A054139	177.672	146.154	7.38863	7.27332	noncoding	BC111535		RNAdb	593	chr1	-	160057810	160058342		TGTCCATCCATCCACTCATGAACAAATGTGAAGGTCAAACACAGACTGGCATTTTCACCC	natural antisense	NM_004983	KCNJ9	G protein-activated inward rectifier potassium	+	160051359	160059212
ASHG19A3A037977	3103.29	3293.1	11.5183	11.7604	noncoding	NR_002930	PTPRVP	RefSeq_NR	4095	chr1	+	202137178	202158577		ATTTGCCTGCCCTTCCCCAACAAAAGGTCCTGTTTCTCTGCCCAGGTTCAGCGTTGCAGC	intergenic
ASHG19A3H0000034	7198.23	7434.1	12.7361	12.9343	noncoding	nc-HOXA7-74-	nc-HOXA7-74	HOX cluster	238	chr7	-	27197697	27197935		TGCGCAGGAACTGGGGCTCCGTGGCGTCCCGATCTGAACCCTCCCTCCACCTTTTGTATT	intergenic
ASHG19A3A038266	98.6698	99.2926	6.55357	6.70754	noncoding	AK097764		RNAdb	1701	chr9	-	140144670	140147949		AATTTGCCAGGAATTTCACTGCCTTCTGGTCAGAATTCATCATCAGAGTCTCCTGGCTCT	natural antisense	NM_001004353	C9orf173	hypothetical protein LOC441476	+	140145729	140147934
ASHG19A3A033328	172.115	171.873	7.34277	7.50866	noncoding	ENST00000453666	RP11-325F22.5	Ensembl	640	chr7	-	104558006	104567077		GCTATCAGAATATTGACTATTAGTGCTTTCATCACGCGGCTCCATCCAAACCCCTGCTTT	intergenic
ASHG19A3A027952	379.036	400.937	8.47731	8.74011	noncoding	AF056438		RNAdb	318	chr5	+	10342924	10343235		TAGCTGTAAGTAAGAATAGTTCATCACCCACTGCTGGGTTTGCATCCTCCTCCAAATAGG	intergenic
ASHG19A3A025467	2014.76	1801.81	10.8866	10.9056	noncoding	ENST00000463499	RP11-49F1.1	Ensembl	571	chr4	+	42473826	42474397		ATAGGAGAACAACATGGAAAGCAAGGCTGAAACTTTTTCTGGTGTCTATAAGCAGCTCAC	intronic antisense	NM_006095	ATP8A1	probable phospholipid-transporting ATPase IA	-	42410391	42659122
ASHG19A3A025467	2014.76	1801.81	10.8866	10.9056	noncoding	ENST00000463499	RP11-49F1.1	Ensembl	571	chr4	+	42473826	42474397		ATAGGAGAACAACATGGAAAGCAAGGCTGAAACTTTTTCTGGTGTCTATAAGCAGCTCAC	intronic antisense	NM_001105529	ATP8A1	probable phospholipid-transporting ATPase IA	-	42410391	42659122
ASHG19A3A028654	95.4643	79.973	6.50536	6.39833	noncoding	ENST00000508517	AC010226.4	Ensembl	539	chr5	+	114937940	114955975		TTACTGAACATCGGATGAGACCATGGATAGTAAATTGGGAGTGAAGGTCCATACCTGGGT	intronic antisense	NM_001164469	TMED7-TICAM2	TRAM adaptor with GOLD domain isoform 2	-	114914338	114961876
ASHG19A3A028654	95.4643	79.973	6.50536	6.39833	noncoding	ENST00000508517	AC010226.4	Ensembl	539	chr5	+	114937940	114955975		TTACTGAACATCGGATGAGACCATGGATAGTAAATTGGGAGTGAAGGTCCATACCTGGGT	intronic antisense	NM_181836	TMED7	transmembrane emp24 domain-containing protein 7	-	114948904	114961876
ASHG19A3A028654	95.4643	79.973	6.50536	6.39833	noncoding	ENST00000508517	AC010226.4	Ensembl	539	chr5	+	114937940	114955975		TTACTGAACATCGGATGAGACCATGGATAGTAAATTGGGAGTGAAGGTCCATACCTGGGT	natural antisense	NM_021649	TICAM2	TIR domain-containing adapter molecule 2	-	114914338	114938176
ASHG19A3A028654	95.4643	79.973	6.50536	6.39833	noncoding	ENST00000508517	AC010226.4	Ensembl	539	chr5	+	114937940	114955975		TTACTGAACATCGGATGAGACCATGGATAGTAAATTGGGAGTGAAGGTCCATACCTGGGT	intronic antisense	NM_001164468	TMED7-TICAM2	TRAM adaptor with GOLD domain isoform 1	-	114914338	114961876
ASHG19A3A043542	141.717	107.218	7.06264	6.8231	noncoding	ENST00000451575	RP11-499O7.7	Ensembl	432	chr10	+	5038044	5039569		ATGCTATTTCTGAGCACAAGCAACTCCATGAACCCTATCCTGGTTTCTCAATAACTCCGA	natural antisense	NM_001354	AKR1C2	aldo-keto reductase family 1 member C2 isoform	-	5031964	5060207
ASHG19A3A043542	141.717	107.218	7.06264	6.8231	noncoding	ENST00000451575	RP11-499O7.7	Ensembl	432	chr10	+	5038044	5039569		ATGCTATTTCTGAGCACAAGCAACTCCATGAACCCTATCCTGGTTTCTCAATAACTCCGA	natural antisense	NM_205845	AKR1C2	aldo-keto reductase family 1 member C2 isoform	-	5031964	5060207
ASHG19A3A054808	362.196	316.115	8.4122	8.39494	noncoding	ENST00000411871	VN2R10P	Ensembl	853	chr16	+	77254302	77255155		GCTTTCAGTGCTGAGCTACTTGGCTGCATCTTTGCCCCCATATATTACGTTACTCTTATG	intergenic
ASHG19A3A015701	7796.89	4549.38	12.8509	12.2288	noncoding	AL050376		misc_RNA	3204	chr2	+	61415148	61418338		ACCTTTTCCCCCCATAAACACTGCAAGGGTAAACAATAAATCTTCTTTCCTAATTATCTC	natural antisense	NM_014709	USP34	ubiquitin carboxyl-terminal hydrolase 34	-	61414589	61697849
ASHG19A3A024408	7508.62	5915.63	12.796	12.6132	noncoding	NR_003249	HNRPDL	RefSeq_NR	3615	chr4	-	83344348	83351378	uc.144-,	ATCTCTGGGGGTCGCACGTTGCGGGCAGAGCGCAAGGCATACACCAGAAAACGCTGTCCT	exon sense-overlapping	NM_001207000	HNRPDL	heterogeneous nuclear ribonucleoprotein D-like	-	83343716	83351378
ASHG19A3A024408	7508.62	5915.63	12.796	12.6132	noncoding	NR_003249	HNRPDL	RefSeq_NR	3615	chr4	-	83344348	83351378	uc.144-,	ATCTCTGGGGGTCGCACGTTGCGGGCAGAGCGCAAGGCATACACCAGAAAACGCTGTCCT	exon sense-overlapping	NM_031372	HNRPDL	heterogeneous nuclear ribonucleoprotein D-like	-	83343716	83351378
ASHG19A3A024408	7508.62	5915.63	12.796	12.6132	noncoding	NR_003249	HNRPDL	RefSeq_NR	3615	chr4	-	83344348	83351378	uc.144-,	ATCTCTGGGGGTCGCACGTTGCGGGCAGAGCGCAAGGCATACACCAGAAAACGCTGTCCT	bidirectional	NM_021204	ENOPH1	enolase-phosphatase E1	+	83351725	83382244
ASHG19A3H0000208	1465.65	1719.65	10.4333	10.837	noncoding	nc-HOXC9-135-	nc-HOXC9-135	HOX cluster	138	chr12	+	54389365	54389503		CGGGCAGGGCAGGGAGCGGCTCTAGCTCTGGGGCGGCTCCCCCTCCAGCCACTCCCAGGC	intergenic
ASHG19A3A000286	691.006	794.467	9.34195	9.72222	noncoding	ENST00000445039	RP4-784A16.5	Ensembl	326	chr1	+	53793920	53802890		ATACAAGGCCTGACACATAACAAGCATGAGacggagtctccctctgttgcccagtctgga	bidirectional	NM_017522	LRP8	low-density lipoprotein receptor-related protein	-	53711216	53793726
ASHG19A3A000286	691.006	794.467	9.34195	9.72222	noncoding	ENST00000445039	RP4-784A16.5	Ensembl	326	chr1	+	53793920	53802890		ATACAAGGCCTGACACATAACAAGCATGAGacggagtctccctctgttgcccagtctgga	bidirectional	NM_033300	LRP8	low-density lipoprotein receptor-related protein	-	53711211	53793821
ASHG19A3A000286	691.006	794.467	9.34195	9.72222	noncoding	ENST00000445039	RP4-784A16.5	Ensembl	326	chr1	+	53793920	53802890		ATACAAGGCCTGACACATAACAAGCATGAGacggagtctccctctgttgcccagtctgga	bidirectional	NM_001018054	LRP8	low-density lipoprotein receptor-related protein	-	53711216	53793726
ASHG19A3A000286	691.006	794.467	9.34195	9.72222	noncoding	ENST00000445039	RP4-784A16.5	Ensembl	326	chr1	+	53793920	53802890		ATACAAGGCCTGACACATAACAAGCATGAGacggagtctccctctgttgcccagtctgga	bidirectional	NM_004631	LRP8	low-density lipoprotein receptor-related protein	-	53711216	53793726
ASHG19A3A050787	128.876	165.926	6.9298	7.4572	noncoding	ENST00000416817	AL583842.8	Ensembl	1573	chr1	-	142712909	142729971	uc011abu.1,ENST00000457776,	CAAACAAAGAAAGGTTGGGAAAACGTATCCTCAGCAATTTCCCAAGAAACTGAAGGAAGA	intergenic
ASHG19A3A024775	53.9369	70.3867	5.66823	6.21624	noncoding	ENST00000515383	AC112236.1	Ensembl	1095	chr4	-	140539292	140544386		TGAGGAATACGGTCGTGTCTGTTAAACTAATTGTAGCTGTTCACTCCACTATATAATTTT	intergenic
ASHG19A3A009971	611.776	437.918	9.16135	8.87133	noncoding	BC038747		misc_RNA	1731	chr17	+	74668023	74669739		TTCTATCAGGCTCTAAGTACAGGCAGGTCCTTAGGACAAATTAGAATAAAACAATCTCAG	intergenic
ASHG19A3A017000	1109.99	1163.22	10.0321	10.273	noncoding	NR_026909	STK16	RefSeq_NR	3118	chr2	+	220110200	220115059		CGCCTGACCCCACCCCTGAAGCTGGCGACGGAGCAGGGCCTGTTTTCTCTACACTATAGT	bidirectional	NM_024506	GLB1L	beta-galactosidase-1-like protein precursor	-	220101502	220110131
ASHG19A3A017000	1109.99	1163.22	10.0321	10.273	noncoding	NR_026909	STK16	RefSeq_NR	3118	chr2	+	220110200	220115059		CGCCTGACCCCACCCCTGAAGCTGGCGACGGAGCAGGGCCTGTTTTCTCTACACTATAGT	natural antisense	NM_006000	TUBA4A	tubulin alpha-4A chain	-	220115000	220118638
ASHG19A3A017000	1109.99	1163.22	10.0321	10.273	noncoding	NR_026909	STK16	RefSeq_NR	3118	chr2	+	220110200	220115059		CGCCTGACCCCACCCCTGAAGCTGGCGACGGAGCAGGGCCTGTTTTCTCTACACTATAGT	exon sense-overlapping	NM_001008910	STK16	serine/threonine-protein kinase 16	+	220110191	220115059
ASHG19A3A018261	119306	121787	16.887	16.8732	noncoding	ENST00000432310	RPL37P1	Ensembl	284	chr20	+	34176245	34176529		TGTGAAGGAACAACACCTAAACCCAAGAGGGTACCTGTTGCAGCATCCAGTTCATCTTAA	intergenic
ASHG19A3A035132	2832.36	2633.98	11.3791	11.4532	noncoding	uc003vts.1	AK094915	UCSC_knowngene	1835	chr7	+	137003338	137011700		CAAATGACTACAGGCATTATCCGAATGATATGATCTTCCTTCCCCATCTTTCTGGGTGTC	intronic antisense	NM_002825	PTN	pleiotrophin	-	136912091	137028546
ASHG19A3A024374	1731.24	1529.49	10.6764	10.6626	noncoding	ENST00000470927	RP11-1E1.1	Ensembl	724	chr4	-	78003555	78004279	NM_198486,ENST00000423238,	AAGTTTGGTGTCATTTGCTTGGAAGACCTCATTCATGAAACTGCCTTCCCAGGGAAGCAT	intergenic
ASHG19A3A022617	10245.8	9594.85	13.2508	13.2996	noncoding	ENST00000450668	RP11-159C21.3	Ensembl	321	chr1	+	53174793	53175114		CAGAAAACGATGAGACGTCTGAGTACCATTAGGAAGCAGCGGGATAAGCTGATAAAGGAA	intergenic
ASHG19A3A035252	273.099	177.973	8.01032	7.562	noncoding	ENST00000473586	OR2A41P	Ensembl	105	chr7	+	143774813	143774918	NM_001004488,	ATTTTAGGAGTCTTACTGGCCCTTGTCCATCTAGTGTTACTGCTACCACTGTCCTTCTGT	intergenic
ASHG19A3A014428	114.221	89.82	6.75976	6.55919	noncoding	ENST00000417715	AC073928.2	Ensembl	444	chr2	-	140861151	140889349		AACCTGAACAGTCTGCTGAAGCACCTGATGTTTGGCCTTCCTGAATGTCATGTAATACGT	intergenic
ASHG19A3A049982	6872.78	6341.55	12.6662	12.7059	noncoding	HIT000192534		H-invDB	288	chr13	+	26979087	26979374		GTGCCCTTACTTCAGCAAAGGAGAAGGAGTAGGAGAGCCTTAGAATTTTTGAGGAAAAAA	intergenic
ASHG19A3A038136	296.679	222.757	8.12818	7.88228	noncoding	ENST00000411431	RP11-569A11.2	Ensembl	365	chr1	+	202601555	202602039		TTTCCCTGTTCTGGATGTGCTTCCTCTTCTATAAACTAGAGACGCTACAAATTCCCACCA	intronic antisense	NM_177402	SYT2	synaptotagmin-2	-	202559724	202679551
ASHG19A3A038136	296.679	222.757	8.12818	7.88228	noncoding	ENST00000411431	RP11-569A11.2	Ensembl	365	chr1	+	202601555	202602039		TTTCCCTGTTCTGGATGTGCTTCCTCTTCTATAAACTAGAGACGCTACAAATTCCCACCA	intronic antisense	NM_001136504	SYT2	synaptotagmin-2	-	202559724	202612581
ASHG19A3A048158	74.937	111.58	6.14902	6.88112	noncoding	uc001uho.2	BC032874	UCSC_knowngene	1327	chr12	-	127399782	127544942		AGGAAAACTGTGCGGAGATCGGCTGCTGATGTGTAAATACTGCTGAAGCTGCTTATTCAA	intergenic
ASHG19A3A022860	7919.35	7546.64	12.8758	12.9571	noncoding	ENST00000473150	KRT8P25	Ensembl	1456	chr3	+	87372417	87373873		TACAAAGATGGAGATCTCTGAGATGAATGGGAACATCAACTGGCTCCAGGCTGAGATAGA	intergenic
ASHG19A3L0002833	8304.68	9737.73	12.9444	13.3202	noncoding	chrX:118607438-118617354+	lincRNA-CXorf56-3	lincRNA	9917	chrX	+	118607438	118617354		ATGGGACAAATCTTGGCTCAACAATATCATACTTTGCATTTCTCCCCCGAGTCACACACG	intergenic
ASHG19A3A038372	1361.64	1001.15	10.3239	10.0516	noncoding	ENST00000449745	RP11-284P20.2	Ensembl	1735	chr9	+	13986173	13987908	NM_014303,	AAGAAGTGGGAGAAGTACCTGTACCAGAAGATCATGTTTGGCAAGAGGCGAAAAATCCGA	intergenic
ASHG19A3A050248	248.058	228.85	7.8711	7.92006	noncoding	ENST00000427086	RP11-429G17.1	Ensembl	527	chr13	+	62379282	62379809		TGAGGACTCAAGACAGTGTTTAATGAAGTTATCCCATCAGCTGTCTGCCCACTCCATAAA	intergenic
ASHG19A3A039998	465.273	642.826	8.76715	9.42122	noncoding	ENST00000426799	RP11-314A15.2	Ensembl	995	chrX	-	65041096	65042091	NM_152523,NM_001142300,	CTTCGCTCCTTAGCAGATGACAATAACCTGAATTTTCTATTTGCTCCTCTTAGCAAAAAA	intergenic
ASHG19A3A012783	12332.2	11527.8	13.5163	13.5632	noncoding	ENST00000425131	AC092066.6	Ensembl	317	chr19	+	45268404	45268721		TGGCATCAGATACATCCCCAATCATAGGCCCCTGGAATAGTGGCGAGCCCTGCTTACTCA	intergenic
ASHG19A3A023200	219.566	392.355	7.69589	8.70768	noncoding	ENST00000419531	RP4-794H19.2	Ensembl	2273	chr1	+	59250831	59366668		CCAATTCTGATCACTGCTCTTATGGTTTGTAATACATTATTTTGGGTTTGGATGATCCTG	intergenic
ASHG19A3A018537	106.356	79.171	6.66019	6.38397	noncoding	ENST00000487421	RP11-157P1.5	Ensembl	612	chr20	+	60928068	60931536		CAGCTCAGCTGCCAGTGCTGACCTTTCCGCTGCTACATGGTTCTGTGCAGAAAGAAAAAA	natural antisense	NM_005560	LAMA5	laminin subunit alpha-5 precursor	-	60884120	60942368
ASHG19A3A046818	140.365	68.3661	7.0496	6.17501	noncoding	AL050189		NRED	2114	chr11	+	85371884	85375268		TCTTATACTACCTTTTAAAATAAAGCAGGAAATGTGGCCAGCAGCTGGTCCCGTCTCTTC	natural antisense	NM_001039618	CREBZF	CREB/ATF bZIP transcription factor	-	85368607	85376182
ASHG19A3A032982	169.756	171.854	7.32273	7.50809	noncoding	AK094163		misc_RNA	2354	chr1	+	158067697	158070051		AACCATTGTAGGTTTTTAGCAATGTGTATCTGTGTGTCCCTCACACCTTTTCCTATTCTA	intergenic
ASHG19A3A015940	1823.82	1477.47	10.7455	10.6163	noncoding	ENST00000431142	AC108479.2	Ensembl	427	chr2	+	88272174	88272601	NM_012477,ENST00000417574,	ATCAACTTGTTGGCCTATCATGGGGCATGCCATGGGGCTGGTCCTTTCCCTACCGGTTCA	intronic antisense	NM_001024457	RGPD1	RANBP2-like and GRIP domain-containing protein	-	88055478	88285309
ASHG19A3L0000665	56.8583	68.5444	5.74481	6.1786	noncoding	chr13:69265749-69290074+	lincRNA-KLHL1-1	lincRNA	24326	chr13	+	69265749	69290074		AACCATAATGGACTATTATCAGGCATTGATATTTGATTCAGCTTGTCCTGCTGGCTTAGG	intergenic
ASHG19A3A032825	285.475	357.74	8.07284	8.57508	noncoding	ENST00000452941	RP11-339F13.1	Ensembl	448	chr7	-	55327501	55327949		GCAGATATTGATGGAGACAGACAAGTTGATTATGAAGAATTAATACAGATGATGACTGCA	intergenic
ASHG19A3A055053	1817.93	1689.31	10.7414	10.8083	noncoding	U23864		misc_RNA	124	chr8	+	144900687	144903822		TCTCCAAAGCCCATTGTCACTGCTGCCACCTGCAGGTTGGTGAGCTGCTGCTGCTGGTGC	natural antisense	NM_001136033	PUF60	poly(U)-binding-splicing factor PUF60 isoform c	-	144898552	144911196
ASHG19A3A055053	1817.93	1689.31	10.7414	10.8083	noncoding	U23864		misc_RNA	124	chr8	+	144900687	144903822		TCTCCAAAGCCCATTGTCACTGCTGCCACCTGCAGGTTGGTGAGCTGCTGCTGCTGGTGC	natural antisense	NM_014281	PUF60	poly(U)-binding-splicing factor PUF60 isoform b	-	144898546	144911537
ASHG19A3A055053	1817.93	1689.31	10.7414	10.8083	noncoding	U23864		misc_RNA	124	chr8	+	144900687	144903822		TCTCCAAAGCCCATTGTCACTGCTGCCACCTGCAGGTTGGTGAGCTGCTGCTGCTGGTGC	natural antisense	NM_078480	PUF60	poly(U)-binding-splicing factor PUF60 isoform a	-	144898546	144911537
ASHG19A3A031255	371.173	399.313	8.44609	8.73408	noncoding	ENST00000442150	XXbac-BPG27H4.7	Ensembl	738	chr6	+	30670843	30680961		TCTTTATATGTATAATGGCTGACCCTGGCGGGACTTCCTTCTCCACTTGTGTGTTGATGT	natural antisense	NM_014641	MDC1	mediator of DNA damage checkpoint protein 1	-	30667583	30685458
ASHG19A3A010273	268.87	194.832	7.98958	7.68756	noncoding	AK024944		NRED	2357	chr1	-	205578843	205581144		CAATGCAGGTCTCTGTGCAGAAATCTGGGGCTCTAAATGAATTACCAAACCAATAGGAAA	intergenic
ASHG19A3A034440	414.478	730.613	8.59947	9.60147	noncoding	ENST00000453697	RP11-321E8.1	Ensembl	763	chr7	+	63894207	63894970	NR_029404,	AGGTCTTGCTCTCAAATTTTTCTGTATTCTACTACGAAATTCTTAATTCCCCTGACCATG	intergenic
ASHG19A3A009662	218.006	255.205	7.68632	8.07977	noncoding	ENST00000502398	RP11-463M16.5	Ensembl	195	chr17	+	46958483	46958678		AAGTGCAACTGGCCAGCAGTCACACAGCTCCATGACTCCAAGGTTGAGTTCCTGCTGCCT	intergenic
ASHG19A3A038728	199.509	230.226	7.5541	7.93034	noncoding	ENST00000456472	RP11-250H24.4	Ensembl	1187	chr9	+	69501017	69502204	ENST00000453058,ENST00000442894,ENST00000415047,	GCAACCAGCATTTAGAGCTGTTTTTGAAGCACTCAGAAATTGTTCTTTTAAGATGACAAT	intergenic
ASHG19A3A024199	7437.01	6100.34	12.7808	12.6562	noncoding	uc003hay.2	AK096319	UCSC_knowngene	3518	chr4	-	56294073	56297591		CACCTGCTTCATGTGGCACATAACTTGTAAGAATCACATTTTGGATTTTAAAGAAAGACT	intergenic
ASHG19A3A040508	720.34	460.376	9.40312	8.94057	noncoding	uc010nta.2	LW-1	UCSC_knowngene	2329	chrX	-	148674182	148676975	NM_001164415,	TTGCCACAACTTCGATAAAGAGCTTCTTCCGCCAGCTAAACTTGTATGGCTTCCGAAAAC	exon sense-overlapping	NM_016153	HSFX1	"heat shock transcription factor, X-linked"	-	148674182	148676974
ASHG19A3A040508	720.34	460.376	9.40312	8.94057	noncoding	uc010nta.2	LW-1	UCSC_knowngene	2329	chrX	-	148674182	148676975	NM_001164415,	TTGCCACAACTTCGATAAAGAGCTTCTTCCGCCAGCTAAACTTGTATGGCTTCCGAAAAC	exon sense-overlapping	NM_001164415	HSFX2	"heat shock transcription factor, X-linked"	-	148674171	148676974
ASHG19A3A008218	284.422	399.889	8.06772	8.73677	noncoding	AB007979		NRED	5596	chr1	-	175284332	175289747		AGGTTTAGAATCTATGTGAGTCTATTTTGGTTAACACACAGGCTCCTCCTTCCAATCATT	intergenic
ASHG19A3A054709	410.002	438.356	8.58521	8.87284	noncoding	ENST00000400979	RP11-7G12.2	Ensembl	1969	chr1	-	166244865	166246834		AAAGATTTTCAAGGGAGCAAACTTAAAGTCTCTCTTGCTCGGAAGAGGCCTCCAGTGAAC	intergenic
ASHG19A3A033064	102.283	118.971	6.60512	6.97653	noncoding	ENST00000445314	AC007000.12	Ensembl	939	chr7	-	76682094	76688755	NR_003666,NM_001099435,ENST00000515340,ENST00000420373,	TTCCAGAAACTTCGGTTCCAGTTCTTCTGTTCCATGAGCGGCAGGGCTTGGGTTTCCCGG	intergenic
ASHG19A3A052268	598.669	733.551	9.13047	9.6077	noncoding	AK021773		misc_RNA	1839	chr15	-	65244282	65248504		ATAAGAAATTTCAGCTTCTCAGTCCCTCTAGCCAACATTTCAGGTGCATGACAGCCTCAG	intronic antisense	NM_182703	ANKDD1A	ankyrin repeat and death domain-containing	+	65204100	65251041
ASHG19A3A045395	1496.02	1819.66	10.4598	10.9216	noncoding	ENST00000435986	RP11-183G22.2	Ensembl	653	chr1	-	50864496	50865445		GAAAATCTATATCCCCCCTAAAGGGGAGACAAAAAAGAAGTTCAAGTCCAATGCACCCAA	intergenic
ASHG19A3A025838	84.9797	80.4595	6.32947	6.40626	noncoding	AL080072		NRED	1322	chr1	+	92654807	92656269		TTGCATTCTAACAGGTTATGATGAATGGAAAGCTGATGGTTCCTGGTTGGAAAAAAGATA	intergenic
ASHG19A3A034004	599.842	927.991	9.13257	9.94091	noncoding	ENST00000419463	AC019117.1	Ensembl	837	chr7	+	17414490	17506288		ATAACATGAAGTGAAGTCTTCATCTCCATTCCCAACAGTCCCCATTCTACTTGCAGAAAG	intergenic
ASHG19A3A051626	14101.7	15002.5	13.7117	13.937	noncoding	ENST00000392947	RP5-998N21.8	Ensembl	381	chr1	-	149424564	149424954	ENST00000419150,	CCGGAAGTGCCTTTTTCCAGAAGGTATTTGAAATATCTCACCAAAAAATATTTGAAGAAC	intergenic
ASHG19A3A049264	219.143	332.028	7.69366	8.46585	noncoding	ENST00000435385	RP11-523H24.5	Ensembl	499	chr13	-	20392260	20392759		ACCGTTTCATCACCAAGGAGGCATCTTCTCCCACTGGACCAAGAGGAAGCCTGTCCTGGA	intergenic
ASHG19A3A030634	654.942	524.221	9.26191	9.12918	noncoding	ENST00000446115	RP11-439L18.3	Ensembl	783	chr6	-	143288169	143343090		GCAGCAACATCAGAAAGCCCCTCTGCTGTGCTTCAGGATCACTCTTATCACTGCATAAAG	intergenic
ASHG19A3A018330	140.915	204.586	7.05479	7.76201	noncoding	ENST00000412519	RP4-753D4.2	Ensembl	1586	chr20	+	41597382	41600132		GTCTCTCGGCCAGCTATACTTGCCTCTGCTCAACAATGATGATTTGAACGTACATGTACA	intronic antisense	NM_007050	PTPRT	receptor-type tyrosine-protein phosphatase T	-	40701391	41818557
ASHG19A3A018330	140.915	204.586	7.05479	7.76201	noncoding	ENST00000412519	RP4-753D4.2	Ensembl	1586	chr20	+	41597382	41600132		GTCTCTCGGCCAGCTATACTTGCCTCTGCTCAACAATGATGATTTGAACGTACATGTACA	intronic antisense	NM_133170	PTPRT	receptor-type tyrosine-protein phosphatase T	-	40701391	41818557
ASHG19A3A019003	226.928	583.768	7.74102	9.28174	noncoding	ENST00000446475	BX322563.3	Ensembl	552	chr21	-	46827300	46829980		CTGAAATTCAAAACTATCTTCCAAAGTCCTTGCATCTGAATCCTGAAGACTCCCCAGTGG	intronic antisense	NM_130445	COL18A1	collagen alpha-1(XVIII) chain isoform 2	+	46825096	46933634
ASHG19A3A038531	388.384	453.542	8.51193	8.92108	noncoding	BC042185		RNAdb	964	chr9	+	35646266	35647470		GGTTCCTCCTCTGTGGCTTCCTGTGGCACTCCAAGTGGGAAGAAGAGAAGCTTGGAAGTG	intergenic
ASHG19A3A011831	954.385	1070.32	9.80916	10.1461	noncoding	ENST00000506567	AC010492.4	Ensembl	219	chr19	-	54749952	54751181		TTGTCCTGCCGCTCGTCCTCCTCCTCCAATGTCGGCGTCAGAGCAAACACAGGACATTGG	intergenic
ASHG19A3A032134	156.058	182.417	7.2041	7.59501	noncoding	ENST00000441249	RP11-445F6.2	Ensembl	914	chr6	+	139592498	139608444	DA201452,	TGCCAAGGGGAAAGTGACTTTACCCACGAGAGAGATTTTTAAATATTCCCCCAACTGCTC	intronic antisense	NM_153235	TXLNB	beta-taxilin	-	139561198	139613208
ASHG19A3A029809	1595.55	2385.9	10.5543	11.308	noncoding	AK025759		NRED	2209	chr6	-	34250999	34253191		GAGAAAATGATACCTCTCACCTTCAAATTAATCAAATAGTTTGTCCTTCTAGTCCCCTTA	intergenic
ASHG19A3A045075	41373.8	44771.9	15.2865	15.4817	noncoding	ENST00000478433	RP5-916O11.1	Ensembl	450	chr11	-	36018775	36019225		ATGTGGCACTGATCTTTAGCCAGAGAACTCTCTGAAACCACTAAAGAGATCCTGGGAACT	intronic antisense	NM_174902	LDLRAD3	low-density lipoprotein receptor class A	+	35965611	36252841
ASHG19A3L0001674	228.7	205.497	7.75205	7.76873	noncoding	chr5:67675269-67719019-	lincRNA-PIK3R1-3	lincRNA	43751	chr5	-	67675269	67719019		AACCTTCCTCCTGGTTGAAGTTAAATGGTGCTTTAGACTCAAGAAGATCTGGGTTTGAAC	intergenic
ASHG19A3A045584	12095	8634.97	13.4891	13.1486	noncoding	ENST00000455818	NDUFB11P1	Ensembl	496	chr11	-	92069197	92069693		AAGGACCCCATTTTGGACATCTGGAACATGTGAGTTGTCTTCTTCTTTGGCGTCTCCATT	intergenic
ASHG19A3A039231	290.158	284.369	8.09745	8.23808	noncoding	ENST00000438380	RP11-175D17.3	Ensembl	617	chr9	+	127532401	127535206		TCTCCCTGCCGCTGCGGGACAAATTGGACCGGAGATTAAAGGACCGGAGTTTAACTCGAG	intronic antisense	NM_001489	NR6A1	nuclear receptor subfamily 6 group A member 1	-	127284702	127533576
ASHG19A3A039231	290.158	284.369	8.09745	8.23808	noncoding	ENST00000438380	RP11-175D17.3	Ensembl	617	chr9	+	127532401	127535206		TCTCCCTGCCGCTGCGGGACAAATTGGACCGGAGATTAAAGGACCGGAGTTTAACTCGAG	intronic antisense	NM_033334	NR6A1	nuclear receptor subfamily 6 group A member 1	-	127284702	127533576
ASHG19A3A053979	152.756	83.7901	7.1737	6.46279	noncoding	uc002fft.1	AK093002	UCSC_knowngene	2211	chr16	-	80862639	80926493		TGCCTGCAGGAGACAAGGTCAGAGATGTTGCTAATAATGGAGAATAAAGGATGCATTCTC	intergenic
ASHG19A3A012451	135.855	138.995	7.0034	7.20162	noncoding	NR_027130	ZNF738	RefSeq_NR	11734	chr19	+	21541734	21571383		CTGTCCTGAAAAATTTTTGTTGAGAATCCACTGGCTATCTCATAAGAGTATTCTTGCAAA	intergenic
ASHG19A3A015707	23544.5	23226	14.4448	14.5699	noncoding	ENST00000414975	RP11-681L4.1	Ensembl	361	chr2	+	62083829	62084190		ACTGTGGTTACCTGTATACCTGTTACCACTTTCAAAAATCTAGATAGTCAGTGTGGATGA	intergenic
ASHG19A3A009423	79.7696	177.167	6.2388	7.55536	noncoding	AK022182		misc_RNA	2893	chr17	+	34604166	34620584		AAGCCTGTGCCAAATACCAACGCTGCAGCATTAAGGAATGTGATAGAAAAGATTCTGAAT	intergenic
ASHG19A3A046506	193.377	177.245	7.51142	7.55642	noncoding	AF083120		misc_RNA	158	chr11	+	62321164	62321291		TACCAAGCTACCCTTACCAAGCTACGGGTGCAGGAAGCCTTTAGATGCCTCGCTCTCCCT	intergenic
ASHG19A3A037781	10937.8	7481.34	13.3475	12.9444	noncoding	uc004axb.2	BC070371	UCSC_knowngene	1370	chr9	-	99957619	99958989	NM_024639,	GCCAACCTAAATCTACCTCAGGTAAGTAGTTAGATTAACTTTTTCAAGATTTCAGACCAA	intergenic
ASHG19A3A026035	31427.4	28790.3	14.8849	14.8674	noncoding	ENST00000512403	RP11-614F17.1	Ensembl	343	chr4	+	132689387	132689730	ENST00000446396,ENST00000414918,ENST00000412428,	ATTTTAAGACTTGGTGGCTGAGAAACAACTCATCCTGGATGGCTGTGGGGCTAGATATAG	intergenic
ASHG19A3A054483	179.897	147.826	7.40619	7.29102	noncoding	uc002dyl.1	CR613685	UCSC_knowngene	1951	chr16	+	30538238	30541977		TAAAAAGTGGAGAGAAACTATCTAAATAAAGGCTTACAGGTGGGGCGCACTGGCTCATGT	bidirectional	NM_024671	ZNF768	zinc finger protein 768	-	30535321	30537910
ASHG19A3A020755	43368.4	48758.4	15.3649	15.6051	noncoding	uc003bze.1	CR623576	UCSC_knowngene	1632	chr3	-	14984293	14985925		TTCCCATAGACTGGGGAAGCTTAATTGCCTTTACAAGTACTTATGTACAACTTTGTATCA	intergenic
ASHG19A3A034742	529.18	293.977	8.95235	8.28715	noncoding	ENST00000429197	AC079781.5	Ensembl	123	chr7	+	97499478	97499601		GCTACGAAGATTGTACACAGAGGTCCAGATACATTCCGTTTTGAGAATGTCAATGGATAC	intronic antisense	NM_183356	ASNS	asparagine synthetase [glutamine-hydrolyzing]	-	97481428	97501854
ASHG19A3A034742	529.18	293.977	8.95235	8.28715	noncoding	ENST00000429197	AC079781.5	Ensembl	123	chr7	+	97499478	97499601		GCTACGAAGATTGTACACAGAGGTCCAGATACATTCCGTTTTGAGAATGTCAATGGATAC	intronic antisense	NM_133436	ASNS	asparagine synthetase [glutamine-hydrolyzing]	-	97481428	97501477
ASHG19A3A034742	529.18	293.977	8.95235	8.28715	noncoding	ENST00000429197	AC079781.5	Ensembl	123	chr7	+	97499478	97499601		GCTACGAAGATTGTACACAGAGGTCCAGATACATTCCGTTTTGAGAATGTCAATGGATAC	intronic antisense	NM_001178076	ASNS	asparagine synthetase [glutamine-hydrolyzing]	-	97481428	97501854
ASHG19A3A034742	529.18	293.977	8.95235	8.28715	noncoding	ENST00000429197	AC079781.5	Ensembl	123	chr7	+	97499478	97499601		GCTACGAAGATTGTACACAGAGGTCCAGATACATTCCGTTTTGAGAATGTCAATGGATAC	intronic antisense	NM_001178077	ASNS	asparagine synthetase [glutamine-hydrolyzing]	-	97481428	97501477
ASHG19A3A034742	529.18	293.977	8.95235	8.28715	noncoding	ENST00000429197	AC079781.5	Ensembl	123	chr7	+	97499478	97499601		GCTACGAAGATTGTACACAGAGGTCCAGATACATTCCGTTTTGAGAATGTCAATGGATAC	intronic antisense	NM_001673	ASNS	asparagine synthetase [glutamine-hydrolyzing]	-	97481428	97501854
ASHG19A3A034742	529.18	293.977	8.95235	8.28715	noncoding	ENST00000429197	AC079781.5	Ensembl	123	chr7	+	97499478	97499601		GCTACGAAGATTGTACACAGAGGTCCAGATACATTCCGTTTTGAGAATGTCAATGGATAC	intronic antisense	NM_001178075	ASNS	asparagine synthetase [glutamine-hydrolyzing]	-	97481428	97501854
ASHG19A3A049656	854.293	807.722	9.64779	9.74622	noncoding	BC047655		RNAdb	1927	chr13	-	73282505	73284417	NM_001071775,	GATTGTACAAGCATTCACTCTTTACTAGCATTTTTTGTTTTTCAGACAAGCTGAAGTGGT	exon sense-overlapping	NM_001071775	MZT1	mitotic-spindle organizing protein 1	-	73282494	73301938
ASHG19A3A024396	129.102	124.844	6.93289	7.04752	noncoding	ENST00000426775	RP3-333A15.1	Ensembl	749	chr1	+	71413061	71417176		GTATCAAAGTCAGGAGCAATTTCTTCTGTTCCCTGTATTTCAATATCTTTGCCTTTTACT	intronic antisense	NM_198716	PTGER3	prostaglandin E2 receptor EP3 subtype isoform 6	-	71318035	71513491
ASHG19A3A024396	129.102	124.844	6.93289	7.04752	noncoding	ENST00000426775	RP3-333A15.1	Ensembl	749	chr1	+	71413061	71417176		GTATCAAAGTCAGGAGCAATTTCTTCTGTTCCCTGTATTTCAATATCTTTGCCTTTTACT	intronic antisense	NM_198717	PTGER3	prostaglandin E2 receptor EP3 subtype isoform 7	-	71318035	71513491
ASHG19A3A024396	129.102	124.844	6.93289	7.04752	noncoding	ENST00000426775	RP3-333A15.1	Ensembl	749	chr1	+	71413061	71417176		GTATCAAAGTCAGGAGCAATTTCTTCTGTTCCCTGTATTTCAATATCTTTGCCTTTTACT	intronic antisense	NM_198714	PTGER3	prostaglandin E2 receptor EP3 subtype isoform 4	-	71318035	71513491
ASHG19A3A050819	1505.65	1591.63	10.4697	10.7215	noncoding	ENST00000471982	RP11-1085N6.1	Ensembl	321	chr14	-	57150138	57150459		CTAAAAGAATGCTGGCTATGAAGAGATGCAAGCGTTTTGAATGGGGAGGAGGTAAGAAGA	intergenic
ASHG19A3A048240	23635.3	27616.1	14.4498	14.8138	noncoding	ENST00000468701	RP11-476M19.1	Ensembl	347	chr12	+	3578115	3578462		AGCTATATTCCTGTGTGAGTGTGCAATTCACAGCAAAGTAGTCAGGAACAGATCTAGTGA	intergenic
ASHG19A3A040096	75.8796	77.6803	6.16635	6.35967	noncoding	ENST00000399586	RP11-324B6.1	Ensembl	6081	chrX	-	74960665	74966746		GATAATTCTTCTAGACAAGTTTCTGAGGATGGGAAACCCAAAGGGTTCTCTTCTAATTCT	intergenic
ASHG19A3A047138	39996.2	44894.3	15.2363	15.4848	noncoding	ENST00000492051	RP11-237N19.1	Ensembl	246	chr11	+	129407763	129408009		AAAGGATCTCCTTCATCCCTCTCCAGAAGACAACAAGAGGAAACACACGAAGAAGTGCTT	intergenic
ASHG19A3A035773	157.664	174.952	7.21997	7.53437	noncoding	HIT000092079		H-invDB	680	chr8	-	55370507	55371798		ATTCTGCTGCGCCAGCCGCTTGCGCTCGTCCTTAGCCCACACCATGAAAGCGTTCATCGG	natural antisense	NM_022454	SOX17	transcription factor SOX-17	+	55370494	55373456
CUST_42_PI426075208	21247.6	25014	14.2921	14.6781	noncoding	nc-HOXB13-207+	nc-HOXB13-207	HOX cluster	108	chr17	+	46806423	46806531		AGGAAGAGGGGACGAGGAGCCGGGCCCCACCTCCTTCTCCTCCTCTCCCTCCCTAGCTTT	bidirectional	NM_006361	HOXB13	homeobox protein Hox-B13	-	46802126	46806111
ASHG19A3A022189	111.716	86.5809	6.73042	6.50795	noncoding	ENST00000423193	AC090044.2	Ensembl	497	chr3	+	898806	899774		TTAAAAAGCATCACTGGCTCCTGACCAGGATTCCAGCTCCATGAACCTCAAACTAGAACA	intergenic
ASHG19A3A022192	5034.42	4623.28	12.2215	12.2512	noncoding	ENST00000415533	AC090042.1	Ensembl	405	chr3	+	1771753	1772158		GACATATGTTCCATTGACTCCTGCTATGAGGCTTTGGATGTTGCCAACAAAATTGGAATC	intergenic
ASHG19A3A034743	70.6561	87.6949	6.06436	6.52472	noncoding	ENST00000413484	AC007875.3	Ensembl	514	chr7	+	97512593	97513107	AK124574,	ATCATAAACACAAACATTCCTCTTCACAAAGGGACCTCAAGTAACCTTAGGCTGGAGGGC	intergenic
ASHG19A3A033694	436.481	344.631	8.67741	8.51936	noncoding	NR_002157	OR2A9P	RefSeq_NR	985	chr7	-	143947563	143948548	uc003weh.1,ENST00000479102,	AGGGCAAGTCTTCTCTCGTTTTTTGCAGATAAAATTTTAGATGTGTTGCATTCATTGGGT	intergenic
ASHG19A3A032078	1513.64	1045.5	10.478	10.1124	noncoding	ENST00000427807	RP1-248E1.2	Ensembl	1351	chr6	+	132593120	132594471		TTTGCTGTTCATGATATGAGATAGACAGCTGCTGAAGTGTCATTAGAGCAGTGGCTGCTG	intergenic
ASHG19A3L0000058	137.289	137.353	7.01765	7.1833	noncoding	Y00062	lincRNA-ATP6V1G3-2	lincRNA	4597	chr1	+	198284952	198726330	NM_080922,NM_080921,NM_002838,	GCTGTCTTTACATGGGGTTTTCAATTTTGCATGCTCGATTATTCCCTGTACAATATTTAA	intronic antisense	NM_133262	ATP6V1G3	V-type proton ATPase subunit G 3 isoform a	-	198492351	198510075
ASHG19A3L0000058	137.289	137.353	7.01765	7.1833	noncoding	Y00062	lincRNA-ATP6V1G3-2	lincRNA	4597	chr1	+	198284952	198726330	NM_080922,NM_080921,NM_002838,	GCTGTCTTTACATGGGGTTTTCAATTTTGCATGCTCGATTATTCCCTGTACAATATTTAA	exon sense-overlapping	NM_080921	PTPRC	receptor-type tyrosine-protein phosphatase C	+	198608136	198726545
ASHG19A3L0000058	137.289	137.353	7.01765	7.1833	noncoding	Y00062	lincRNA-ATP6V1G3-2	lincRNA	4597	chr1	+	198284952	198726330	NM_080922,NM_080921,NM_002838,	GCTGTCTTTACATGGGGTTTTCAATTTTGCATGCTCGATTATTCCCTGTACAATATTTAA	intron sense-overlapping	NM_133494	NEK7	serine/threonine-protein kinase Nek7	+	198126107	198291548
ASHG19A3L0000058	137.289	137.353	7.01765	7.1833	noncoding	Y00062	lincRNA-ATP6V1G3-2	lincRNA	4597	chr1	+	198284952	198726330	NM_080922,NM_080921,NM_002838,	GCTGTCTTTACATGGGGTTTTCAATTTTGCATGCTCGATTATTCCCTGTACAATATTTAA	exon sense-overlapping	NM_080923	PTPRC	receptor-type tyrosine-protein phosphatase C	+	198608136	198662334
ASHG19A3L0000058	137.289	137.353	7.01765	7.1833	noncoding	Y00062	lincRNA-ATP6V1G3-2	lincRNA	4597	chr1	+	198284952	198726330	NM_080922,NM_080921,NM_002838,	GCTGTCTTTACATGGGGTTTTCAATTTTGCATGCTCGATTATTCCCTGTACAATATTTAA	exon sense-overlapping	NM_002838	PTPRC	receptor-type tyrosine-protein phosphatase C	+	198608136	198726545
ASHG19A3L0000058	137.289	137.353	7.01765	7.1833	noncoding	Y00062	lincRNA-ATP6V1G3-2	lincRNA	4597	chr1	+	198284952	198726330	NM_080922,NM_080921,NM_002838,	GCTGTCTTTACATGGGGTTTTCAATTTTGCATGCTCGATTATTCCCTGTACAATATTTAA	intronic antisense	NM_133326	ATP6V1G3	V-type proton ATPase subunit G 3 isoform b	-	198492351	198510075
ASHG19A3A044517	8173.87	4776.67	12.9239	12.3011	noncoding	uc001laz.2	AK000154	UCSC_knowngene	5435	chr10	+	115671514	115676949		GGTGAGAATGTGTTTATACTGTATATGGAAACCTAATGCCTCTTTTCTAAAGCTTTGTAC	exon sense-overlapping	NM_198514	NHLRC2	NHL repeat-containing protein 2	+	115614390	115672265
ASHG19A3H0000158	83.0914	86.6062	6.29788	6.50831	noncoding	nc-HOXC9-132-	nc-HOXC9-132	HOX cluster	148	chr12	+	54386125	54386273		CCTTCCCCTTCTATAGCTCCATCTCCAGGGGAAGGACATGTTTGGGGTGTTGGTAGGTTA	intergenic
ASHG19A3A039435	237.937	202.255	7.80858	7.74537	noncoding	uc004cgm.2	BC101937	UCSC_knowngene	108	chr9	+	138585382	138585490		ACAGCCTGGCTGCTAGCAGGCAAAGAAGTCAGGGAAGATGCTCTCCACCTCGTCCTTCAG	natural antisense	NM_001101677	SOHLH1	spermatogenesis- and oogenesis-specific basic	-	138585254	138591374
ASHG19A3A039435	237.937	202.255	7.80858	7.74537	noncoding	uc004cgm.2	BC101937	UCSC_knowngene	108	chr9	+	138585382	138585490		ACAGCCTGGCTGCTAGCAGGCAAAGAAGTCAGGGAAGATGCTCTCCACCTCGTCCTTCAG	natural antisense	NM_001012415	SOHLH1	spermatogenesis- and oogenesis-specific basic	-	138585254	138591374
ASHG19A3A041575	168.229	184.816	7.30882	7.61383	noncoding	ENST00000417443	NCRNA00086	Ensembl	2913	chrX	+	134555867	134559682	NR_024493,NR_024359,	AGACACTGACCGGAATGACATACTTTTCTGTGTGTGATTCACTGTGTACTGGTCAGCACA	intergenic
ASHG19A3A011217	64504.7	79088.6	15.9553	16.2747	noncoding	ENST00000467018	CTC-251H24.1	Ensembl	154	chr19	-	18396152	18396306	NM_001000,ENST00000495111,ENST00000460281,ENST00000446011,ENST00000424573,ENST00000422215,	GAAATAAAATCAGGTACAACTCCAAAAGGACACTGGAGAAGAACCAAGCTGGGTCTATAA	intergenic
ASHG19A3A041577	85.3252	66.8678	6.33402	6.14184	noncoding	ENST00000426910	RP11-265D19.5	Ensembl	5675	chrX	+	134566884	134572559		AACCTGCATCTGCAGAAGGCTCTGACCGCCTGTGAACATGACTGCCAAGTGCTCCTGGAA	intergenic
ASHG19A3A018430	7613.01	7525.61	12.8155	12.952	noncoding	ENST00000422599	KRT18P4	Ensembl	1288	chr20	+	48573281	48574569		ACAGAGAGGAGCTGGACATGTACTGATCTCAGTAGATTGAGGAGAACACTACAGAAGTCA	intergenic
ASHG19A3A039081	191.31	170.549	7.49583	7.49823	noncoding	ENST00000435485	RP11-308N19.1	Ensembl	1686	chr9	+	109040672	109367076		TGTGTCTTAAGCTGGGTCATTGAAGTGGAATGTTTTCACAAGACCTCCTCCACTTGCTAC	intergenic
ASHG19A3A032563	72199.2	78412.1	16.1253	16.2599	noncoding	ENST00000396414	AC004129.9	Ensembl	783	chr7	-	25251785	25252582		GTGGATACCATCCAGCTGGTTGTCTTCCTGCCTGCCTTATGTCGTAAAATGGGGGTCTCT	intergenic
ASHG19A3A033939	374.261	339.794	8.45823	8.49723	noncoding	ENST00000348899	PMS2CL	Ensembl	569	chr7	+	6769411	6771575		TCAGGTCACCGCTTGCTCTAGTTCCCAGGCTTTGGCCCCCAGTGGACGAGAATCGCTGAG	intergenic
ASHG19A3A013030	436.665	512.559	8.67811	9.09792	noncoding	ENST00000441512	AC011515.2	Ensembl	579	chr19	+	55182681	55184042		AAGAAAAAGATACATCACCTTCCCCAGAGTTCTGGCCAGAAGTTCTCCCAAGATGACTTC	intergenic
ASHG19A3A009690	1032.18	1258.84	9.92898	10.385	noncoding	ENST00000430471	RP11-134G8.8	Ensembl	598	chr1	-	201433510	201434274		GGTTCAACTTGCTCATCTGATGTGTGAATTACATCACACAGTTGAATGAGAATTTGTTAA	intergenic
ASHG19A3A031776	122529	142966	16.9244	17.0964	noncoding	ENST00000403475	RP11-378G13.2	Ensembl	994	chr6	+	84102134	84103128	NM_002046,ENST00000513513,ENST00000434621,ENST00000425487,ENST00000423411,BC078673,	CTCAACGACCACTTTGTCAAGCTCATTTCCTGGTATGACAATGAATTTGGCTGCAGCAAC	intronic antisense	NM_002395	ME1	NADP-dependent malic enzyme	-	83920109	84140938
ASHG19A3A019406	358.321	144.45	8.39402	7.25579	noncoding	uc002zkr.3	BC016035	UCSC_knowngene	1174	chr22	-	16124263	16193004	uc001vvq.1,	CATATATGCAACTATGACAGGAGGTACTAAAAGCCTTAGATAAGCATGGTGTATCTTTTT	intergenic
ASHG19A3A029404	991.779	839.827	9.87048	9.79991	noncoding	ENST00000445390	RP1-290I10.4	Ensembl	636	chr6	-	10460138	10460774		ATTAAAGTCGAGGAAAGTTATGTGATGCCAACCAAAACCACTGAAGTGTTGTGGTTGCAG	intergenic
ASHG19A3A030686	353.485	296.158	8.37451	8.29738	noncoding	ENST00000419134	RP1-12G14.7	Ensembl	340	chr6	-	149912890	149913799		CTCCTGCATCTCAGCCATTCTTACCTGGGCAAAGGTTTTATATCAGTGTAACCAAAACAG	intergenic
ASHG19A3A014388	124.241	149.887	6.87862	7.31342	noncoding	ENST00000419784	RP1-156L9.1	Ensembl	840	chr2	-	132741509	132751734	ENST00000448748,	AGATGAGGAGAAATTCGAAGTATTCCAACGTCTGCCCTCATGAATAGATCAAGCCTTGGG	intergenic
ASHG19A3A021731	701.103	882.405	9.36455	9.86899	noncoding	ENST00000460914	RP11-505J9.1	Ensembl	211	chr3	-	148413780	148413991		AGAAGGCAGAGAAACTGAAGCAGTTCTGGCACCCTGGTTTGTTAGAGAAGGAGATGAAAT	intergenic
ASHG19A3A009370	914.467	884.56	9.74908	9.87252	noncoding	AF086167		misc_RNA	550	chr1	-	200295521	200296221		ATGATTACTGGACTTCTGTGCTGCCCAGTTCCACCACACCCCTACTGTGCCTTTCCTTTT	intergenic
ASHG19A3A009102	57407	71151	15.7889	16.1332	noncoding	ENST00000479856	RP11-713H12.1	Ensembl	347	chr17	+	8464547	8464894	NR_002309,NM_001029,ENST00000473326,ENST00000471178,ENST00000470205,ENST00000447425,ENST00000444468,ENST00000419089,ENST00000419030,ENST00000393490,ENST00000391676,	ACATTACCGTGTGAGTTGTGCAATTCACAGCAAAGTAGTCAGGAATCGATCTCGTGAAGC	intronic antisense	NM_005964	MYH10	myosin-10	-	8377529	8534036
ASHG19A3A018316	50950.2	49360.9	15.6051	15.6206	noncoding	CR604483		RNAdb	1073	chr20	+	39752035	39753108	NR_002719,NM_003286,	GAAACCATTTTCCCATCATCCTTTGTTCTGAGCATTCGCTGTACCCTTTAAGATATCCAT	exon sense-overlapping	NM_003286	TOP1	DNA topoisomerase 1	+	39657461	39753126
ASHG19A3A040778	377.138	365.704	8.46965	8.61121	noncoding	ENST00000450430	GS1-466O4.3	Ensembl	606	chrX	+	26218158	26218764		AAAGTCAATGATACCATCCCAAGGTGTCTTCCTATCCCTTTATACAAGGCACTGAGACAT	intergenic
ASHG19A3A046604	227.731	253.612	7.74636	8.07091	noncoding	AK024558		misc_RNA	1243	chr1	-	61691244	61692464		TTCCTTTTGGTGATACAAAATAAAATTTCCTGCTATAGTTGCTCCATCTCTTTCACATGC	intronic antisense	NM_001145512	NFIA	nuclear factor 1 A-type isoform 4	+	61547533	61928460
ASHG19A3A046604	227.731	253.612	7.74636	8.07091	noncoding	AK024558		misc_RNA	1243	chr1	-	61691244	61692464		TTCCTTTTGGTGATACAAAATAAAATTTCCTGCTATAGTTGCTCCATCTCTTTCACATGC	intronic antisense	NM_001134673	NFIA	nuclear factor 1 A-type isoform 1	+	61547979	61928460
ASHG19A3A046604	227.731	253.612	7.74636	8.07091	noncoding	AK024558		misc_RNA	1243	chr1	-	61691244	61692464		TTCCTTTTGGTGATACAAAATAAAATTTCCTGCTATAGTTGCTCCATCTCTTTCACATGC	intronic antisense	NM_001145511	NFIA	nuclear factor 1 A-type isoform 3	+	61542945	61928460
ASHG19A3A046604	227.731	253.612	7.74636	8.07091	noncoding	AK024558		misc_RNA	1243	chr1	-	61691244	61692464		TTCCTTTTGGTGATACAAAATAAAATTTCCTGCTATAGTTGCTCCATCTCTTTCACATGC	intronic antisense	NM_005595	NFIA	nuclear factor 1 A-type isoform 2	+	61547979	61928460
ASHG19A3A020576	2889.41	3727.86	11.4021	11.945	noncoding	uc003bhg.1	AK091355	UCSC_knowngene	2233	chr22	+	46646309	46648542	CR624447,	TCCCGGATAGCTGAGGGGCGCGAGGGCGCCTCCAGTCTCCCACCTGCCCTCCCGCGCCGC	bidirectional	NM_207327	C22orf40	hypothetical protein LOC150383	-	46639909	46646193
ASHG19A3A023852	589.938	581.04	9.10857	9.2739	noncoding	AK123130		misc_RNA	3345	chr4	-	2264891	2268236		TTTTGCATTTTTTGTTCAGTTTCATTGCCAGCAGCAGCCCCTGTGTCCCACTGAGTACTT	intergenic
ASHG19A3A030189	59.8276	103.718	5.81947	6.77381	noncoding	ENST00000415381	RP11-301M17.1	Ensembl	517	chr1	+	147718439	147718956		TGTGACCAGCGCGACTCACCGCTCTAATCGCTCCGATTTTCCAAGGCCTTGCTCAGTAGT	intergenic
ASHG19A3A036211	254.64	269.624	7.91058	8.1608	noncoding	G43337		misc_RNA	150	chr8	-	144335604	144335754		TCTTCACGGGAGAGCTAGTTGTTTAAAGCAGTGGTCCCCAACCTTCTGTGGTCCCCCGTG	intronic antisense	NM_173832	ZFP41	zinc finger protein 41 homolog	+	144329108	144344875
ASHG19A3A036507	5277.51	3770.47	12.2866	11.9599	noncoding	ENST00000508840	CTD-2345M20.1	Ensembl	1898	chr8	+	30094897	30098513		TCTTTCCTTGGTATTGAAACTGATGACGGAGTCACGACTGTCCTCATTAAGCACAATACT	intergenic
ASHG19A3A042918	129.131	163.666	6.93337	7.43666	noncoding	ENST00000435209	RP11-399N22.3	Ensembl	294	chr10	-	72553985	72554279		TTCACAGCAAAGTAGTCAGAAATCAATCTCATGAAGGCTTCAAGGACCCAACACTCCCAC	intergenic
ASHG19A3A047274	521.513	304.825	8.93168	8.34404	noncoding	NR_024420	LOC389634	RefSeq_NR	682	chr12	-	8509561	8543348		CTGGAAAGTGGTGGTAGTTCCAGATTTATGTGGATGTTACTTTGTTTTTCCCTATAAAAT	intergenic
ASHG19A3A044516	126.347	144.252	6.90197	7.2536	noncoding	ENST00000396885	RP11-506B15.4	Ensembl	699	chr1	-	43913446	43914315		TCGATGTCCCCAATGGATTTGGCATGGACTGCTTCTAGGAGTTCCTCCAGCTCTGCCAGG	natural antisense	NM_015284	KIAA0467	protein SZT2	+	43888796	43918304
ASHG19A3A046173	937.87	376.628	9.78323	8.64959	noncoding	ENST00000333752	AC116533.3	Ensembl	264	chr11	+	17073577	17073845	BC008657,	AACAACAGATGTCTCAATATTCCTCGTCCTAGAACTCTCAGAGGATCCAGAACTACAGCC	intergenic
ASHG19A3A011200	52.3537	97.0655	5.62666	6.67228	noncoding	uc002ngr.2	BC039402	UCSC_knowngene	624	chr19	-	17555634	17559116		TCTATTTAGCAGGTGTGTGCTGGAATAGAACGTGGGGCATGGGACCCTGGGCTGGGTAGA	exon sense-overlapping	NM_001190844	TMEM221	transmembrane protein 221	-	17546317	17559376
ASHG19A3A025276	23710.5	26224.4	14.4549	14.7376	noncoding	ENST00000468675	RP11-1396O13.2	Ensembl	780	chr4	+	9564790	9565570		AATCATGACCTGAGAGGTGCGGCAAATGACTTGAAAGAATTGGTCAATAAAATGATTCCA	intergenic
ASHG19A3A000137	16304.9	16497.4	13.9296	14.0748	noncoding	ENST00000419923	POLR2J4	Ensembl	6167	chr7	-	43980493	44056090		AGACCACACACTGGGAAACATCATTAAATCacgtgcctgcttccccttcgccttctgccg	natural antisense	NM_015983	UBE2D4	ubiquitin-conjugating enzyme E2 D4	+	43966034	43995735
ASHG19A3A000137	16304.9	16497.4	13.9296	14.0748	noncoding	ENST00000419923	POLR2J4	Ensembl	6167	chr7	-	43980493	44056090		AGACCACACACTGGGAAACATCATTAAATCacgtgcctgcttccccttcgccttctgccg	intronic antisense	NM_175064	SPDYE1	putative WBSCR19-like protein 6	+	44040488	44049723
ASHG19A3A038687	157.381	190.121	7.21774	7.65263	noncoding	ENST00000427875	RP11-459O16.7	Ensembl	228	chr9	+	66396885	66397113	ENST00000442795,ENST00000420308,	AAAGTTGTAGGTCTGCCAAGTGGTGCTGGATTCAACACATCTTCTCACCTTCTCTTTCCA	intergenic
ASHG19A3A049789	262.743	291.121	7.95457	8.27111	noncoding	AK125572		RNAdb	3355	chr13	-	100504863	100609401		ATGACAATGTGTCTGGCAAGTTCTTCCCCTGTGTGACTTGCTCATATTTCAAATAGTGGA	intronic antisense	NM_206808	CLYBL	"citrate lyase subunit beta-like protein,"	+	100258918	100549388
ASHG19A3A039461	524.52	771.676	8.94114	9.68215	noncoding	uc004ciz.1	AK128864	UCSC_knowngene	2702	chr9	+	139640612	139644363		ATTAAATATAAAAAGTCCCTGAAAGCCTTTTGAAAAAGGCTCCCACCTCCTCCTGGCCCA	natural antisense	NM_198946	LCN6	epididymal-specific lipocalin-6 precursor	-	139638468	139642980
CUST_469_PI426073487	7706.32	7717.87	12.8349	12.9857	noncoding	uc.471+	uc.471	UCR	239	chrX	+	41208370	41208609	NM_001356,	GCCCTTGTACATTTTGCCCATAACTTTTTACAAAGTACTTCTTTTATTGCACATTCAGAG	exon sense-overlapping	NM_001193416	DDX3X	ATP-dependent RNA helicase DDX3X isoform 2	+	41192650	41209524
CUST_469_PI426073487	7706.32	7717.87	12.8349	12.9857	noncoding	uc.471+	uc.471	UCR	239	chrX	+	41208370	41208609	NM_001356,	GCCCTTGTACATTTTGCCCATAACTTTTTACAAAGTACTTCTTTTATTGCACATTCAGAG	exon sense-overlapping	NM_001193417	DDX3X	ATP-dependent RNA helicase DDX3X isoform 3	+	41192650	41209524
CUST_469_PI426073487	7706.32	7717.87	12.8349	12.9857	noncoding	uc.471+	uc.471	UCR	239	chrX	+	41208370	41208609	NM_001356,	GCCCTTGTACATTTTGCCCATAACTTTTTACAAAGTACTTCTTTTATTGCACATTCAGAG	exon sense-overlapping	NM_001356	DDX3X	ATP-dependent RNA helicase DDX3X isoform 1	+	41192650	41209524
ASHG19A3A041119	119070	121784	16.8829	16.8719	noncoding	ENST00000422565	RP13-470G3.1	Ensembl	375	chrX	+	67819940	67820315	NM_000993,ENST00000413849,ENST00000396544,ENST00000395150,ENST00000393325,	GTTACCTATGTACCTGTTACCACTTTCGAAAATCTACAGACAGTCAATGTGGATGAGAAC	intergenic
ASHG19A3L0002211	145.4	89.0269	7.09975	6.54665	noncoding	AL832443	lincRNA-BNC2-2	lincRNA	2382	chr9	+	15874538	16061659		GGAAAGAATGCATTCACAGAAAGCCAAGGAATGATAACACTAATGCTAATACAATACTAC	exon sense-overlapping	NM_173550	C9orf93	hypothetical protein LOC203238	+	15553096	15971897
ASHG19A3A033656	235.538	282.295	7.79396	8.22795	noncoding	CR610450		misc_RNA	863	chr7	-	142159449	142160308		ACGCTGGTGACTAACTTTTCTTTTAATACTGTGTCTGAAGTCTCTCTCACCCAGAGGGTC	intergenic
ASHG19A3A018714	190.849	144.406	7.49164	7.25524	noncoding	ENST00000400028	GPXP2	Ensembl	600	chr21	-	28515662	28516271	NM_201397,NM_000581,ENST00000388829,	TTCCAGACCATTGACATCGAGCCTGACATCGAAGCCCTGCTGTCTCAAGGGCCCAGATGT	intergenic
ASHG19A3A030626	28247.2	26373.6	14.725	14.7483	noncoding	ENST00000407538	RP11-471B18.1	Ensembl	456	chr6	-	141243592	141244048		CAAAATCTACCCCAGTACAAGATCCCAGACTGGTCCTTAAACAGACAGAAGTATATAAAG	intergenic
ASHG19A3A046121	72.541	117.179	6.0995	6.95278	noncoding	NR_027713	FLJ46111	RefSeq_NR	1828	chr11	+	9115909	9117737		TCAAAACGAAGCTCATGACCTAGAAGAAGCTTCTCTGCTTTCTCGAATCTCTGCCTGGTT	intergenic
ASHG19A3A047909	50358.4	35543.2	15.586	15.161	noncoding	ENST00000478358	RP11-490G8.1	Ensembl	465	chr12	-	95861172	95861637	NM_000992,ENST00000494408,ENST00000458386,	TGAAAATGGCACAGAAATGGTATCAAGAAACCCCGATCACAAAGATACGAATCTCTTAAG	intergenic
ASHG19A3L0000845	58.0858	144.62	5.77568	7.25798	noncoding	BF850330	lincRNA-MESDC2	lincRNA	177	chr15	+	81260381	81260482		ATAAATTTCCATGTACCAGCAAGCAGCATGGTCATATTGCAGTCTCCTGCTAGACCGCTT	intergenic
ASHG19A3A024271	189.086	150.975	7.47827	7.32292	noncoding	ENST00000510547	RP11-1267H10.3	Ensembl	851	chr4	-	69492564	69494617	ENST00000509021,	AATTTCTTCACCCACCCTTACCAAATGTCGATTTTGTGGGGGAACTCCACTGTAAACCAG	intergenic
ASHG19A3A015669	86.6632	112.906	6.35717	6.89828	noncoding	ENST00000366287	AC012358.8	Ensembl	771	chr2	+	55535966	55541797		AAGAACTATCTTGACTGTCTTGATGAGGGAGCTGAAGAAATCCTTCACTGGAGTCTGAGC	natural antisense	NM_018084	CCDC88A	girdin isoform 2	-	55514977	55647057
ASHG19A3A015669	86.6632	112.906	6.35717	6.89828	noncoding	ENST00000366287	AC012358.8	Ensembl	771	chr2	+	55535966	55541797		AAGAACTATCTTGACTGTCTTGATGAGGGAGCTGAAGAAATCCTTCACTGGAGTCTGAGC	natural antisense	NM_001135597	CCDC88A	girdin isoform 1	-	55514977	55647057
ASHG19A3A043876	210.288	206.722	7.63442	7.77784	noncoding	ENST00000436165	OR6D1P	Ensembl	939	chr10	+	45753632	45754571		ATTGTCCTCTCTCTGGTGTATGGCAGCTGTGTCTTCATATATGTGAAGCCGAAGCAAATG	intergenic
ASHG19A3A023034	207.571	215.512	7.61311	7.83653	noncoding	ENST00000442226	RP3-340N1.5	Ensembl	510	chr1	-	20510734	20512979		CTTCATCACCCACCCAAAAAAGATTAAAGTGGATTCTTCATCAGCTATTTTAAAATCACC	intronic antisense	NM_152376	UBXN10	UBX domain-containing protein 10	+	20512577	20519942
ASHG19A3A013120	277.378	275.912	8.03171	8.19355	noncoding	ENST00000478259	CTC-258N23.1	Ensembl	806	chr19	+	57576701	57577507		AATCCCTGGCTTGCATTGCCAAAGCTGGAAAAGGCAAAGACTAAAGAACTTGCCACCAAA	intergenic
ASHG19A3A033179	348.979	301.645	8.35505	8.32791	noncoding	G31789		misc_RNA	239	chr7	-	94721144	94721383		GTCCATGAATTAAAAAACCATGCTTTTCTCTCCTTGCCACACAGCTTTAGTTTGAAAAAA	intronic antisense	NM_001166163	PPP1R9A	neurabin-1 isoform 5	+	94539209	94925727
ASHG19A3A033179	348.979	301.645	8.35505	8.32791	noncoding	G31789		misc_RNA	239	chr7	-	94721144	94721383		GTCCATGAATTAAAAAACCATGCTTTTCTCTCCTTGCCACACAGCTTTAGTTTGAAAAAA	intronic antisense	NM_001166161	PPP1R9A	neurabin-1 isoform 2	+	94539209	94925727
ASHG19A3A033179	348.979	301.645	8.35505	8.32791	noncoding	G31789		misc_RNA	239	chr7	-	94721144	94721383		GTCCATGAATTAAAAAACCATGCTTTTCTCTCCTTGCCACACAGCTTTAGTTTGAAAAAA	intronic antisense	NM_017650	PPP1R9A	neurabin-1 isoform 4	+	94536948	94925727
ASHG19A3A033179	348.979	301.645	8.35505	8.32791	noncoding	G31789		misc_RNA	239	chr7	-	94721144	94721383		GTCCATGAATTAAAAAACCATGCTTTTCTCTCCTTGCCACACAGCTTTAGTTTGAAAAAA	intronic antisense	NM_001166160	PPP1R9A	neurabin-1 isoform 1	+	94536948	94925727
ASHG19A3A033179	348.979	301.645	8.35505	8.32791	noncoding	G31789		misc_RNA	239	chr7	-	94721144	94721383		GTCCATGAATTAAAAAACCATGCTTTTCTCTCCTTGCCACACAGCTTTAGTTTGAAAAAA	intronic antisense	NM_001166162	PPP1R9A	neurabin-1 isoform 3	+	94539209	94925727
ASHG19A3A015966	164.125	149.221	7.27645	7.30605	noncoding	ENST00000443031	AC116050.1	Ensembl	1804	chr2	+	91777535	91809447	NM_177998,	TTATCAGCCACTGAAGGAGTTTTCCCTGTCACCCATTCAGTGCATACTTTGTTGCAGGTA	intergenic
ASHG19A3A014170	139.191	76.0049	7.03723	6.32763	noncoding	uc002tee.3	FLJ38668	UCSC_knowngene	547	chr2	-	109124004	109150675	ENST00000322353,	AGTCAAGAAGAACATGCCCCAAGTTATTCGTCAGTGAGGCGGAAATTGTGGTGTACTTGT	bidirectional	NM_001193483	LIMS1	LIM and senescent cell antigen-like-containing	+	109150856	109303702
ASHG19A3A014170	139.191	76.0049	7.03723	6.32763	noncoding	uc002tee.3	FLJ38668	UCSC_knowngene	547	chr2	-	109124004	109150675	ENST00000322353,	AGTCAAGAAGAACATGCCCCAAGTTATTCGTCAGTGAGGCGGAAATTGTGGTGTACTTGT	natural antisense	NM_181453	GCC2	GRIP and coiled-coil domain-containing protein	+	109065576	109125854
ASHG19A3A024005	116.68	95.2921	6.78936	6.64654	noncoding	ENST00000504991	RP11-339D20.1	Ensembl	413	chr4	-	20039182	20039595		TTGAACTATGGGAAGATTTGACTGTCTTGGATGTCAGCTTATTATTCCATAGGTGGGGGG	intergenic
ASHG19A3A053582	71.7444	165.893	6.08511	7.45658	noncoding	AK097966		misc_RNA	1908	chr16	-	22424506	22427098		TCAGGTAATTACCCCCGCTCAAAACTAAAAACTGTCCAGTCGCCATTTTTTCTGTTTTTT	intergenic
ASHG19A3A041433	83421.1	82245.4	16.3536	16.3214	noncoding	ENST00000434365	RP1-241P17.3	Ensembl	1310	chrX	+	114937130	114938440	NM_001404,	AAGAATGCCTTCGCCAGTGTCATCCTCTTTGGAACCAACAATATCAGCTCCATTTCTGGA	intergenic
ASHG19A3A052798	1215.88	1125.18	10.164	10.2241	noncoding	uc001znn.1	LOC729082	UCSC_knowngene	1379	chr15	+	41576200	41601901		CTGCATTTCCCCTCCATTCTTGAAGCCAATCTTTTTCAAGAAATGACTAAGCAGCACCTG	natural antisense	NM_007280	OIP5	protein Mis18-beta	-	41601465	41624819
ASHG19A3A042761	112.292	180.102	6.73745	7.57683	noncoding	ENST00000414178	RP11-563N6.4	Ensembl	511	chr10	-	50042956	50044714		TCTTTCTCCCAGATCTCTCAATGTGAGCCAAGAGCAAACTGTTAAAAGCCACTTGGGACA	intronic antisense	NM_020945	WDFY4	WD repeat- and FYVE domain-containing protein 4	+	49893517	50191001
ASHG19A3A044906	477.935	432.519	8.80751	8.85399	noncoding	uc001mfx.2	BC027619	UCSC_knowngene	1561	chr11	-	8032826	8038036		TTTTAAGTTGGTTCCTGCTCCTTGGTGCTGCTCTATTACCTCGAAACTTTCAGAAAAAGT	intergenic
CUST_784_PI426073487	157.085	124.169	7.21462	7.03934	noncoding	uc.305-	uc.305	UCR	305	chr10	-	103211434	103211739		ATTACTGACCCTCTGCCATACGGTGCCTATTGATTAACCTGACAGAGATGATGAGCTTGA	intronic antisense	NM_033637	BTRC	F-box/WD repeat-containing protein 1A isoform 1	+	103113824	103317070
CUST_784_PI426073487	157.085	124.169	7.21462	7.03934	noncoding	uc.305-	uc.305	UCR	305	chr10	-	103211434	103211739		ATTACTGACCCTCTGCCATACGGTGCCTATTGATTAACCTGACAGAGATGATGAGCTTGA	intronic antisense	NM_003939	BTRC	F-box/WD repeat-containing protein 1A isoform 2	+	103113824	103317070
ASHG19A3A021821	1713.09	980.896	10.6601	10.0218	noncoding	ENST00000482834	RP11-111F10.3	Ensembl	794	chr3	-	155761943	155762737	NM_001136152,ENST00000502317,	TACATGAGCTGGTGAAACATGAAGAAAACAGCTTGGTCTTTGAGGACTCAGAGGAACTGG	intergenic
ASHG19A3A042241	2202.57	2859.05	11.0115	11.5645	noncoding	ENST00000458678	RP11-435F13.1	Ensembl	957	chr1	+	241082952	241083909		AATACTTTGTCAAACCATGAAACTAAGGTGGCTATGGTGGTTGCAGTAACAGCAGTAGCT	intronic antisense	NM_002924	RGS7	regulator of G-protein signaling 7	-	240938816	241520478
ASHG19A3A047100	12429	20329	13.524	14.3924	noncoding	HIT000047909		H-invDB	3337	chr11	+	124983057	124996677		TACACTTTGGGGAGCAGGAAGCCAATAAAAAGTTCAGAAGTCATTGGATGTCAAAAATAA	intergenic
ASHG19A3A034856	317.502	404.035	8.22337	8.75168	noncoding	ENST00000502615	AC093668.5	Ensembl	917	chr7	+	102213834	102220258	ENST00000510452,	AGACTATGCAGGATAATGAGCCCCCACATACTCCGCATCTCTTGTCTGTAATTATCAGCT	natural antisense	NM_006989	RASA4	ras GTPase-activating protein 4 isoform 1	-	102220092	102257205
ASHG19A3A034856	317.502	404.035	8.22337	8.75168	noncoding	ENST00000502615	AC093668.5	Ensembl	917	chr7	+	102213834	102220258	ENST00000510452,	AGACTATGCAGGATAATGAGCCCCCACATACTCCGCATCTCTTGTCTGTAATTATCAGCT	natural antisense	NM_001079877	RASA4	ras GTPase-activating protein 4 isoform 2	-	102220092	102257205
ASHG19A3A034856	317.502	404.035	8.22337	8.75168	noncoding	ENST00000502615	AC093668.5	Ensembl	917	chr7	+	102213834	102220258	ENST00000510452,	AGACTATGCAGGATAATGAGCCCCCACATACTCCGCATCTCTTGTCTGTAATTATCAGCT	bidirectional	NM_001097615	POLR2J3	DNA-directed RNA polymerase II subunit RPB11-b2	-	102178365	102213068
ASHG19A3A007431	62.796	77.2448	5.89337	6.35135	noncoding	NR_026871	LOC441869	RefSeq_NR	1501	chr1	-	1353801	1356650		GGCAAGGTGCCAGCGTGGAGGAGAGGACATTGAGGTGCTGCTGGGCCACGGGGCAGACCC	exon sense-overlapping	NM_001145210	LOC441869	hypothetical protein LOC441869	-	1353799	1356650
ASHG19A3A039512	77447.4	90607.2	16.2411	16.4459	noncoding	uc004coq.3	DQ582201	UCSC_knowngene	132	chrM	-	236	368		GTTTTTGGGGTTTGGCAGAGATGTGTTTAAGTGCTGTGGCCAGAAGCGGGGGGAGGGGGG	intergenic
ASHG19A3A021376	117.037	157.16	6.79377	7.38014	noncoding	AK055050		misc_RNA	2452	chr3	-	107643945	107646398		CTCCAGCCCTAGAACTCAGCACGTGAACAAACTTTCCTCTGGGATTCAGTGAAACATATT	intergenic
ASHG19A3A039774	91.5421	85.9451	6.44225	6.49771	noncoding	NR_002191	PPP1R2P9	RefSeq_NR	894	chrX	-	42636618	42637486		GCTTAGAAGATATCTGCTTCACCCTTGCAATTGTTTGTGAAATACAAACCTTGTTACTGT	intergenic
CUST_708_PI426073487	67.7601	72.8774	6.00294	6.26631	noncoding	uc.229-	uc.229	UCR	296	chr7	-	115134644	115134940		GTTCTCTGATATAACTTCATTTCTCCTGACAGTGACAATTTTCACCTCAGTACAATTTCT	intergenic
ASHG19A3A052850	360.129	524.022	8.40331	9.12852	noncoding	ENST00000507729	AC122108.1	Ensembl	1916	chr15	+	45021319	45025045	uc001zue.2,	TGTGGACATTCTGGACCACATAAATAAAGACAACACCCTAGAGATGGTGAAGTAAGTTGT	intergenic
ASHG19A3A028388	101671	89378.1	16.6422	16.4322	noncoding	ENST00000477662	CTD-2503O16.1	Ensembl	156	chr5	+	74227486	74227642	NM_001000,ENST00000495111,ENST00000446011,ENST00000424573,ENST00000422215,	AATAAAATCAGGTACAACTCCAAAAGGAGACATTGGAGAAGAACTAAGCTGGGTCTATTA	intergenic
ASHG19A3A031648	136.594	163.865	7.01148	7.43853	noncoding	ENST00000407852	RP11-524H19.1	Ensembl	437	chr6	+	54635380	54635821		CAGTAGACACAAAAGGCTCAGGACTTAGCAAGGAGTTAGGGAATTCCCTTTATTGAAACC	intergenic
ASHG19A3A034507	2979.36	3296.71	11.4509	11.7616	noncoding	ENST00000422817	RP3-455J7.3	Ensembl	456	chr1	+	167560628	167561084		TGTAAAGGATGGAAACTATAGCTAGGTCCTGGTCTGGAAAACAAGCTCTGTGAAGACCTG	intergenic
ASHG19A3A011941	173.882	154.587	7.35819	7.35601	noncoding	uc002qrx.1	BC063675	UCSC_knowngene	1562	chr19	-	58769781	58790174	ENST00000499062,	TCCTTTGGCAACACATTAACTACACTCTGTGGCCATCCCTTGACTTCTGAGAGGATGTTT	bidirectional	NM_021089	ZNF8	zinc finger protein 8	+	58790317	58807254
ASHG19A3A011941	173.882	154.587	7.35819	7.35601	noncoding	uc002qrx.1	BC063675	UCSC_knowngene	1562	chr19	-	58769781	58790174	ENST00000499062,	TCCTTTGGCAACACATTAACTACACTCTGTGGCCATCCCTTGACTTCTGAGAGGATGTTT	intronic antisense	NM_014480	ZNF544	zinc finger protein 544	+	58740069	58775008
ASHG19A3A027629	750.251	702.075	9.46034	9.54364	noncoding	ENST00000509655	AC016571.1	Ensembl	1991	chr5	-	156790390	156792509		ATCAATATTGGAAACCTGTGCTTTAGTTCTTCCACCTCTGCTGCTGCTATGCTGTGTGAC	intronic antisense	NM_014376	CYFIP2	cytoplasmic FMR1-interacting protein 2	+	156696361	156822606
ASHG19A3A027629	750.251	702.075	9.46034	9.54364	noncoding	ENST00000509655	AC016571.1	Ensembl	1991	chr5	-	156790390	156792509		ATCAATATTGGAAACCTGTGCTTTAGTTCTTCCACCTCTGCTGCTGCTATGCTGTGTGAC	intronic antisense	NM_001037332	CYFIP2	cytoplasmic FMR1-interacting protein 2	+	156693186	156822606
ASHG19A3A027629	750.251	702.075	9.46034	9.54364	noncoding	ENST00000509655	AC016571.1	Ensembl	1991	chr5	-	156790390	156792509		ATCAATATTGGAAACCTGTGCTTTAGTTCTTCCACCTCTGCTGCTGCTATGCTGTGTGAC	intronic antisense	NM_001037333	CYFIP2	cytoplasmic FMR1-interacting protein 2	+	156693090	156822606
ASHG19A3A008517	484.315	443.984	8.82516	8.89175	noncoding	ENST00000474761	CTD-2377D24.2	Ensembl	144	chr17	-	46767842	46767986	nc-HOXB9-192-,	TTCCAGAAAATGTTAACATCACTCTGAAGGGATACACAGTTGTGAAGGGCCCCAGAGGAA	intergenic
ASHG19A3A015460	157.935	114.773	7.22293	6.92195	noncoding	AK130631		misc_RNA	1398	chr2	+	28613583	28614776		AAGAATTGGGTAAACTGAGGCTAACACAGACCCTGGACCAAAACCTAAGTTCCCTGACTT	intergenic
ASHG19A3L0001037	330.214	553.532	8.28055	9.20927	noncoding	chr2:113359154-113374304-	lincRNA-CHCHD5-1	lincRNA	15151	chr2	-	113359154	113374304		TGGTTATACAGTCAAATAATACTCTAGGCAATATCCCCCATGGGATGGTGTTCTCCCCAG	intergenic
ASHG19A3A045512	672.835	662.269	9.30127	9.46169	noncoding	AK054718		misc_RNA	1804	chr11	-	76153921	76155724		CGAAAGACAAGGGGCTTATAAAACTGACTCTGACCTTAAGAAGTAGCATATGAGTGATGA	bidirectional	NM_020193	C11orf30	protein EMSY	+	76156068	76262589
ASHG19A3H0000047	1511.16	1526.55	10.4755	10.6575	noncoding	nc-HOXB4-167-	nc-HOXB4-167	HOX cluster	348	chr17	-	46656230	46656578		CTAACCGTGCAGCTAAATGAGATTTGGAAGGCGAAGTCTCCCCGAATTAGTGCATGAATT	intergenic
ASHG19A3A009172	5566.05	3878.51	12.3623	11.9954	noncoding	ENST00000419919	AC098850.1	Ensembl	791	chr17	+	16586750	16587541	NM_002936,	TGGTATAACTAACTGGGTTCAAGGTTGGAAGAAAAATGGGTGGAAGACAAGTGCAGGGAA	intergenic
ASHG19A3A032916	333.329	217.166	8.29278	7.84918	noncoding	ENST00000430604	RP11-3N2.4	Ensembl	821	chr7	-	63572129	63572950	ENST00000435196,	TTCTACCACTTACACTAGTATTCTGTATATGACATATCTCAATACCCATCCTAATCTCCA	intergenic
ASHG19A3A055059	80.1176	80.9313	6.24553	6.41557	noncoding	uc001alp.1	AK125078	UCSC_knowngene	847	chr1	-	5621768	5728315		TGGAAAAGAAAACCCCATTTCCAAGGCTCATAGGTGAAGAGACTTTTGCCTTGTCTGAGA	intergenic
ASHG19A3A053339	185.343	142.875	7.45103	7.2393	noncoding	ENST00000356631	AL022341.1	Ensembl	648	chr16	-	691038	691688		CCCTGTGCTGGGGGGATCCCTGGGCTGGGGGGGTCCCTGTGCTGGGGGGCCCTGTGCTGA	bidirectional	NM_138418	FAM195A	hypothetical protein LOC84331	+	691848	698474
ASHG19A3A022704	135.307	88.7413	6.99669	6.54231	noncoding	ENST00000492683	RP11-64C1.1	Ensembl	1602	chr3	+	55330227	55334766		CTGGAATAACTGCCCTTGTGCCTACAATCAGAGATGTATTTTGGGATCAATTCCCAGACC	intergenic
ASHG19A3A053577	238.152	125.411	7.80974	7.05447	noncoding	uc002djs.3	LOC23117	UCSC_knowngene	3910	chr16	-	21848005	21902953	uc010cfp.1,uc002diz.1,NR_027155,NR_027154,NR_002473,NR_002453,NM_015092,ENST00000309865,	AGATGCTATCCTTTGGCAGTGGGCCATATGGGAAGCTGCACAATTCACTGTTCTTTCTAA	intergenic
ASHG19A3L0002962	349.438	282.561	8.3574	8.22938	noncoding	AA769057	lincRNA-UBE2G1	lincRNA	456	chr17	-	4298328	4298629		TTAAAGTGCTTAGAATGGGGGTTCTTGCTGCCCCTGAGAGATATCTTCATTTGGGATTGG	intergenic
ASHG19A3A023632	70721.7	73474.6	16.0937	16.1768	noncoding	ENST00000433853	RP11-778D9.4	Ensembl	732	chr3	+	183867491	183868223		AAATCCATGAAGTTTGTGGATGGCCTGACGATCCACAGTGGAGACCCTATTAACTACTAC	intergenic
ASHG19A3A034057	144.724	130.709	7.09253	7.11278	noncoding	G30841		misc_RNA	279	chr7	+	23501235	23501514		CAATTTGTGGAAGATGACATACAAAGATAGCCACCATCAATTCCTCTCTCGGTACATGCA	intronic antisense	NM_006547	IGF2BP3	insulin-like growth factor 2 mRNA-binding	-	23349827	23509995
ASHG19A3A028350	83.6389	110.562	6.30673	6.86636	noncoding	ENST00000450213	PMCHL2	Ensembl	1917	chr5	+	70671612	70681621	NR_003921,ENST00000418902,	CCCTCCTTGGTTTACCTCCATCATTAAAAAACAACAATGACAACGACAACAAAAAACAAA	intergenic
ASHG19A3A026597	533.263	717.878	8.96482	9.5749	noncoding	ENST00000514549	RP11-61K20.1	Ensembl	312	chr5	-	20158770	20159082		TTACAGAAATTATTGAAGGACATCTGGCAAACAGAGAACATAGACCAACTTGCTGCATGA	intergenic
ASHG19A3A000151	143.736	121.721	7.08253	7.00998	noncoding	ENST00000421632	CDKN2BAS	Ensembl	678	chr9	+	22046749	22118701		ACACCCGGCGGATAGAGAGAATTTTGACAGATTGGCTTCTCTCACATGGCAAGAAACATT	intergenic
ASHG19A3A020956	323.062	244.67	8.24821	8.01708	noncoding	AK096537		misc_RNA	2967	chr3	-	44533263	44536227		ACTATATTAATAACATGCTCATTGCCAGCCTATGAAACAAGTTGACCACTCCATACATAA	intergenic
ASHG19A3A027669	19216.5	19390.1	14.1542	14.3207	noncoding	BC082768		NRED	1750	chr5	-	167975501	167977154	uc003lzy.3,	CTTGGGTTTTGCTTGTTTGTATTGGATAACCATTAAGCCAACTTCAGTTTCTCTGCCTTT	intergenic
ASHG19A3A029436	320.947	269.429	8.24052	8.15991	noncoding	uc003nbk.2	BC033996	UCSC_knowngene	474	chr6	-	15248048	15248887	ENST00000441978,	GCATTCTACCCAGCCCTCTGCAATGCGGATGTATTTTAATTCTTAAATTCTTTATGGAAC	intronic antisense	NM_004973	JARID2	protein Jumonji	+	15246526	15522253
ASHG19A3A007161	225.207	290.096	7.73015	8.26583	noncoding	uc011kfs.1	SPDYE8P	UCSC_knowngene	5766	chr7	+	74936532	74974605	uc010lcg.2,NR_003664,NM_175064,NM_001146210,NM_001099435,NM_001031618,NM_001004351,ENST00000445314,ENST00000420373,ENST00000412399,ENST00000398408,ENST00000380425,ENST00000380407,ENST00000359797,	GGGACAAAGATCTGAGGGTGTCGGACAAGTATCTCCTGGCTATGGTCATAGCGTATTTCA	intergenic
ASHG19A3A052999	100.59	103.974	6.58321	6.77704	noncoding	ENST00000502544	AC087482.1	Ensembl	1784	chr15	+	67332911	67340583		TAAAATCTCAGGCAGGTCTTGTAGGTTTTCTGGGCCCCTTCAGTTTCCAAGACAGTCTTA	intergenic
ASHG19A3A033735	167.045	201.613	7.30019	7.7403	noncoding	ENST00000497366	RP4-584D14.6	Ensembl	420	chr7	-	150076942	150080973		ATCTCCACACCTTCCACATGTAGATATCCTCAACGTTCTTCACAGAGGGGATGCCCGCAC	intronic antisense	NM_173680	ZNF775	zinc finger protein 775	+	150076405	150095719
ASHG19A3A018084	147.255	138.734	7.11926	7.19855	noncoding	ENST00000455902	RP4-706G24.1	Ensembl	420	chr1	+	25534629	25535360		TTAGTTGAGATTTCTGCTGCTAACGGCCAAAGCCATTCCTCACTGCTATTGACTTTCCCA	intergenic
ASHG19A3A043632	151.902	90.0437	7.16573	6.56216	noncoding	ENST00000440878	RP11-295P9.3	Ensembl	397	chr10	+	13673332	13690230		GAAAATCACAAGGCATCTGTGCATATACTGGTGGATTTTAATGAGAGTCCTGTGTTTGGA	natural antisense	NM_018027	FRMD4A	FERM domain-containing protein 4A	-	13685705	14372866
ASHG19A3A030964	944.534	975.724	9.79594	10.0152	noncoding	NR_004855	HULC	RefSeq_NR	500	chr6	+	8652441	8654077	ENST00000503668,	GAACACAAATTAAGTGTTCAACCTGTGGCAAATTTGTACTTTCTCCCTGAATTATGTTGT	intergenic
ASHG19A3A017021	83.9693	85.7019	6.31347	6.49336	noncoding	ENST00000432993	AC114765.1	Ensembl	754	chr2	+	220970376	221315499		TTTCTTGGACAAATGCCCTGTGTCAGAAGAGTGTGGTAAACAGAAGCTCAGCTCCTTCAA	intergenic
ASHG19A3A007717	353.254	390.366	8.3737	8.70115	noncoding	NR_033125	ALG13	RefSeq_NR	2927	chrX	+	110924345	110933623	NR_033124,	TGTGTCGGCGCCCGACAGTCTGCAAGTACAAGGATTCCTTGAAAGAAGACATTCAGAAAG	exon sense-overlapping	NM_018466	ALG13	UDP-N-acetylglucosamine transferase subunit	+	110924345	110933623
ASHG19A3A007717	353.254	390.366	8.3737	8.70115	noncoding	NR_033125	ALG13	RefSeq_NR	2927	chrX	+	110924345	110933623	NR_033124,	TGTGTCGGCGCCCGACAGTCTGCAAGTACAAGGATTCCTTGAAAGAAGACATTCAGAAAG	exon sense-overlapping	NM_001099922	ALG13	UDP-N-acetylglucosamine transferase subunit	+	110924345	111003875
ASHG19A3A007717	353.254	390.366	8.3737	8.70115	noncoding	NR_033125	ALG13	RefSeq_NR	2927	chrX	+	110924345	110933623	NR_033124,	TGTGTCGGCGCCCGACAGTCTGCAAGTACAAGGATTCCTTGAAAGAAGACATTCAGAAAG	exon sense-overlapping	NM_001168385	ALG13	UDP-N-acetylglucosamine transferase subunit	+	110924345	110933623
ASHG19A3A007717	353.254	390.366	8.3737	8.70115	noncoding	NR_033125	ALG13	RefSeq_NR	2927	chrX	+	110924345	110933623	NR_033124,	TGTGTCGGCGCCCGACAGTCTGCAAGTACAAGGATTCCTTGAAAGAAGACATTCAGAAAG	exon sense-overlapping	NM_001039210	ALG13	UDP-N-acetylglucosamine transferase subunit	+	110924345	110933623
ASHG19A3A015206	117422	123751	16.8644	16.8974	noncoding	ENST00000436229	RP11-185B14.1	Ensembl	259	chr1	+	8891172	8891431	ENST00000471227,	GCATATGTTCGACTGGCTCCTGATTATGATGCTTTGAATGTTGCCGACAAAATTGGGATC	intergenic
ASHG19A3A030249	30483.7	37495.6	14.8405	15.2448	noncoding	ENST00000403258	RP11-459O1.1	Ensembl	1108	chr6	-	88985600	88986708		ATGACACTACCTTCAACTCCATTATGAAGTGTGACGTGGACAACCACAAAGACCTGTACG	intergenic
ASHG19A3A016533	7891.25	7986.15	12.8696	13.0368	noncoding	uc001awz.2	CR622439	UCSC_knowngene	2770	chr1	+	15992765	15995535		GCTAGATGCATTTGGGTTTGAATTTTTGTCACATACTGAAATGTAAGTCAGCCCTAAATA	intergenic
ASHG19A3A034382	1669.24	2006.31	10.6187	11.0612	noncoding	ENST00000455912	RP11-1217F2.3	Ensembl	772	chr7	+	57235586	57236358		AAGGGCTCTCTCCTCTCTCCTAGTTACATCCAGCTTAGCTATATGATTTCACTTTAACTC	intergenic
ASHG19A3A025587	71.0997	76.3445	6.0731	6.33554	noncoding	ENST00000507344	RP11-51P8.1	Ensembl	768	chr4	+	66724478	66725922		CAAACATTTTTAGGTATGTAGAAACAATGTATACACACACATGCACACACACATTAGTGC	intergenic
ASHG19A3A017696	192.196	186.481	7.50267	7.62581	noncoding	ENST00000445420	RP11-445H22.4	Ensembl	452	chr20	-	43323842	43374636		ACTTCAGGGAACCCTGAATAGCCATGGGAGCCAAATGTATTACTCCTCTGATGCCTACAA	intronic antisense	NM_003881	WISP2	WNT1-inducible-signaling pathway protein 2	+	43343884	43356452
ASHG19A3A017696	192.196	186.481	7.50267	7.62581	noncoding	ENST00000445420	RP11-445H22.4	Ensembl	452	chr20	-	43323842	43374636		ACTTCAGGGAACCCTGAATAGCCATGGGAGCCAAATGTATTACTCCTCTGATGCCTACAA	natural antisense	NM_022358	KCNK15	potassium channel subfamily K member 15	+	43374487	43379668
ASHG19A3A028520	497.954	294.743	8.86341	8.2915	noncoding	ENST00000395970	AC008500.1	Ensembl	1242	chr5	+	92603043	92604293		AAACTAAAAGGCACCATTGACGTGTCAAAGTTGGTTACAGGGATCATCCTGGCCGTGTTT	intergenic
ASHG19A3A045459	696.401	660.152	9.35511	9.4574	noncoding	ENST00000502328	AP000867.13	Ensembl	121	chr11	-	71290773	71290894		AGTCCAGCTGCTGCAAGCCCTGCTGCTCCCAGTCCAGCTGCTGTGTCCCTATTTGCTGTC	intergenic
ASHG19A3A042598	32899	22044.9	14.9458	14.5009	noncoding	ENST00000442520	RP11-460H18.2	Ensembl	397	chr10	-	32520776	32521173		AAGAACAGAATGAAGAAAGTCAGGGGACTGTAAAGGCCAATGTTTGTGTGGGCAAAAAGC	intergenic
ASHG19A3A033094	5265.26	5436.4	12.2835	12.4907	noncoding	uc003uhq.1	AK092048	UCSC_knowngene	3218	chr7	-	81575759	81578977		GCCAACTGGCTTTTGTGAACAATAGATCTTTTCTCCCCTTTATTTTGTTCTCTTGACACT	intergenic
ASHG19A3A010989	17356.5	15868.5	14.0171	14.0208	noncoding	ENST00000503096	RP11-365D23.1	Ensembl	1137	chr1	-	214778812	214782183	uc010crb.1,NM_031213,NM_001130111,	AGAGCTACGCACTCCTTTCCTTTTGGAAGCAAGAAGAAAATACGTGAAAACAGAAATTAA	intronic antisense	NM_016343	CENPF	centromere protein F	+	214776531	214837914
ASHG19A3H0000203	1416	1162.77	10.3791	10.2727	noncoding	nc-HOXD9-17-	nc-HOXD9-17	HOX cluster	168	chr2	+	176986678	176986846		GTGTGTGAGTGTGGCAGGGGGAGGGGGCCCTCCGATCTGCTCCATCCGTCCGTTTTATTA	intergenic
ASHG19A3A019553	81.9546	64.955	6.27967	6.10216	noncoding	NR_024591	POM121L1P	RefSeq_NR	3995	chr22	-	22974027	22987012	NR_024593,NR_024583,NR_003714,ENST00000420508,ENST00000419222,ENST00000319850,	AAAGGCTGGACTCAGCAGGAACACCAAATCCCGGACCAGGCAGAAACCACCCAAGACTGA	intergenic
ASHG19A3A052744	1634.48	1082.52	10.5866	10.164	noncoding	NR_003144	LOC723972	RefSeq_NR	738	chr15	+	35529526	35530262	NM_006305,AK311417,	GTAACCAACCTGAACGACTACCGAGAAAATGTGTTCAAGCTCCTCCTGCAACTCACATAT	intergenic
ASHG19A3A014050	618.155	702.231	9.17367	9.544	noncoding	AK023895		NRED	1727	chr2	-	96868403	96870129		TACGACATTCCACCAGTGGAAACATGCTCCCCTTTATTATGTGGCAAGAATGATAATTCG	intron sense-overlapping	NM_020151	STARD7	"stAR-related lipid transfer protein 7,"	-	96850602	96874573
ASHG19A3A041501	279.576	334.565	8.04205	8.47435	noncoding	ENST00000417160	RP11-375A20.1	Ensembl	1123	chrX	+	125863086	125864209		GCTAGCCCTCATATCTTCCATTCTCATTCTACAAGTTATTCTTGTACTTCACGTGTCTAA	intergenic
ASHG19A3A038141	18629.1	17156	14.1124	14.1387	noncoding	ENST00000411521	RP11-323H21.2	Ensembl	244	chr9	-	134657956	134658200		GAGAACTTCTACAACACTTCCATTGAGGAAATTCCCCTCAATGTTCCTGACCTCATCTGA	intergenic
ASHG19A3A013814	120843	126203	16.9009	16.9232	noncoding	ENST00000446011	AC016700.6	Ensembl	156	chr2	-	70480986	70481142	uc002qbl.2,NR_003699,NM_052969,NM_001000,ENST00000495111,ENST00000477662,ENST00000460281,ENST00000459631,ENST00000453780,ENST00000424573,ENST00000422215,ENST00000416137,CD048049,	AATAAAATCAGGTACAACTCCAAAAGGAGACATTGGAGAAGAACCAAGCTGGGTCTATAA	intergenic
ASHG19A3A052698	417.766	349.422	8.60978	8.53894	noncoding	uc001zcp.1	BC043570	UCSC_knowngene	2525	chr15	+	29967193	29971367		ATTACCTGTGCTGTCCCTGCATTCTCAAGCTCCAAATTGTCAACTAAGAAATGGTCACTT	intergenic
ASHG19A3A041085	133.307	153.385	6.97661	7.34559	noncoding	ENST00000449206	RP1-267M5.1	Ensembl	961	chrX	+	62062011	62062972		GTATTTTCCACCCTTTACACTAGCCTTACACATATGACACATTTCAATGTCCATCTTAAT	intergenic
ASHG19A3A017022	85.3546	105.783	6.33454	6.8022	noncoding	ENST00000424395	AC093843.1	Ensembl	512	chr2	+	221655797	221662613		AGCCTAAAAGATGAACGATACGGTGTTTATACTTCTCCCTAGGAAGAGCCATAGGCCTTG	intergenic
ASHG19A3A013555	72.282	78.6028	6.09494	6.37502	noncoding	ENST00000457457	AC016735.1	Ensembl	400	chr2	-	43228461	43233380		AAAGATGTCACAGAGAGTAAAATGAGAAAAATCCAGTAGCCCGTGCCCAGAGCAGTTCCT	intergenic
ASHG19A3L0000524	585.965	84.4095	9.09861	6.47391	noncoding	BG898852	lincRNA-RAB3IP	lincRNA	605	chr12	-	70474248	70474753		AGATTTCATTAGGCACACACACACCTACACACATTACAGAAGGAAACTAAAATATTTCAG	intergenic
ASHG19A3A018389	860.409	1014.78	9.65849	10.0728	noncoding	G43266		misc_RNA	101	chr20	+	44577291	44577392		ATTGAGACTGACAGGCCAGTGGGTCCACCCAAACAAAAATAAATTTCTCTCCCAAAGCCT	natural antisense	NM_022095	ZNF335	zinc finger protein 335	-	44577291	44600833
ASHG19A3A035032	7700.43	6608.37	12.8336	12.769	noncoding	ENST00000450885	RP11-274B21.3	Ensembl	754	chr7	+	128294022	128294776	uc002khh.2,NR_028327,NR_028326,NR_028324,NR_028322,NR_024368,ENST00000412867,	CGCTTTTGACTTTTGGCAGCCTCTTCAGGCGCAGAACTTGATCTCCAGTCGGCCTTTGCA	intergenic
ASHG19A3A027283	2824.02	4120.67	11.375	12.0823	noncoding	ENST00000487382	CTD-2158P22.1	Ensembl	476	chr5	-	118882825	118883301		AATAATCAGAAAAAGAAGCCAAAGACAAAGGTACCTGGATTCAACTGAAGCGCCAGTCTG	intergenic
ASHG19A3A015598	4918.58	6137.07	12.1875	12.6645	noncoding	ENST00000423051	AC012354.8	Ensembl	461	chr2	+	45223551	45224012		ATTCTGGAGAATCTTGTGTTTGGCAAAGGATCCCAAGCAAAGACCTTCCCTGAGATTCTC	intergenic
ASHG19A3A007131	120.212	91.3171	6.83023	6.58166	noncoding	NR_003186	NCF1B	RefSeq_NR	1552	chr7	+	72634673	72649978	NR_003187,NM_000265,	TCAAGCGGGGGGCGCCGCCCCGCAGGTCGTCCATCCGCAACGTGCACAGCATCCACCAGC	intergenic
ASHG19A3A051092	573.929	423.836	9.0671	8.82145	noncoding	uc001eng.1	AX747132	UCSC_knowngene	1711	chr1	-	145372087	145373798	uc001els.1,	GAAAAATGTGTCTTCCTTAATTTTTCCCATAAGAACCACCCTACTTCATGCCCTGTCTCT	intergenic
ASHG19A3A026995	945.714	994.713	9.79904	10.0429	noncoding	BC021677		misc_RNA	2008	chr5	-	78516740	78518726		AGCTACAGGAAAAGCCCCATTGGAATAGACCTCCACCAATAATAATATTATCTATAATAG	intergenic
ASHG19A3A022826	186.678	148.723	7.46116	7.30057	noncoding	uc003dpu.2	BC039495	UCSC_knowngene	1450	chr3	+	75721423	75728453		ACGGGCCGCCGCTTGGGTTTCTCTCGTGTTCAGGGTAGTATGGACGTGGACAATGGCAGT	intergenic
ASHG19A3A042954	581.849	571.914	9.08859	9.25203	noncoding	AK024173		NRED	1324	chr10	-	75240427	75241648		TGATCATTACAATGATGACCCTAAAGCATCAGGAAAATACTGTATACTATATGCTCAGAG	intron sense-overlapping	NM_001142353	PPP3CB	serine/threonine-protein phosphatase 2B	-	75196562	75255782
ASHG19A3A042954	581.849	571.914	9.08859	9.25203	noncoding	AK024173		NRED	1324	chr10	-	75240427	75241648		TGATCATTACAATGATGACCCTAAAGCATCAGGAAAATACTGTATACTATATGCTCAGAG	intron sense-overlapping	NM_021132	PPP3CB	serine/threonine-protein phosphatase 2B	-	75196562	75255782
ASHG19A3A042954	581.849	571.914	9.08859	9.25203	noncoding	AK024173		NRED	1324	chr10	-	75240427	75241648		TGATCATTACAATGATGACCCTAAAGCATCAGGAAAATACTGTATACTATATGCTCAGAG	intron sense-overlapping	NM_001142354	PPP3CB	serine/threonine-protein phosphatase 2B	-	75196562	75255782
ASHG19A3A016442	7906.95	9511.4	12.8717	13.2836	noncoding	ENST00000427278	ZEB2AS	Ensembl	1187	chr2	+	145275981	145278683		ATACCTTGAAGTCTCCGCAAACGCTTTAGTGGAAGAAATGAAATTCCACCTCCCTCCCTT	natural antisense	NM_001171653	ZEB2	zinc finger E-box-binding homeobox 2 isoform 2	-	145141941	145277958
ASHG19A3A016442	7906.95	9511.4	12.8717	13.2836	noncoding	ENST00000427278	ZEB2AS	Ensembl	1187	chr2	+	145275981	145278683		ATACCTTGAAGTCTCCGCAAACGCTTTAGTGGAAGAAATGAAATTCCACCTCCCTCCCTT	natural antisense	NM_014795	ZEB2	zinc finger E-box-binding homeobox 2 isoform 1	-	145141941	145277958
ASHG19A3A053889	210.276	129.569	7.63423	7.10177	noncoding	uc010cfp.1	AK308867	UCSC_knowngene	1210	chr16	-	70263706	70269272	uc002djs.3,uc002diz.1,NR_027155,NR_027154,NR_002473,NR_002453,NM_015092,ENST00000309865,	TCTTTTGGCAGTGGGCCATATGGGAAGCTGCACAATTCACTGTTCTTTCTAAGCTGAGAA	intergenic
ASHG19A3A030800	269.982	294.855	7.99506	8.29228	noncoding	ENST00000434356	RP11-347L18.1	Ensembl	466	chr6	-	164767521	164769677		GAAGAGTCTTAAATGCCTTCTTTACCCTTTTACTCCATGTCCATGCAGTCTACCTGCTTT	intergenic
ASHG19A3A038937	168.483	189.526	7.31089	7.64703	noncoding	ENST00000414425	RP11-62C3.5	Ensembl	1803	chr9	+	94933973	94935776		GGTACTCATCAACCTGGACAAATTGGAGATCCCCCAGCCCAATTTGGAGGTGCCTGGCAC	intergenic
ASHG19A3A050762	122.381	90.5326	6.85737	6.56932	noncoding	ENST00000450546	AL592494.1	Ensembl	426	chr1	-	121315743	121322322		GCAAAAACATGACTTTGCCAGCTTCTCTTACAATTTGTGAATCATACTTTTGAATGCCAA	intergenic
ASHG19A3A042588	98.7413	99.2731	6.55472	6.70734	noncoding	AF086437		misc_RNA	432	chr10	-	31477801	31478223		ATCTTTGCCAAACAATGTGCAGTGAAATGAGAGACCACCTTCCTTATGGCATGTTTCATA	intergenic
ASHG19A3A054167	395.139	308.666	8.53634	8.36181	noncoding	NR_028105	DCAF8	RefSeq_NR	1728	chr1	-	160209012	160232318	NR_028106,	TTGAGCATGTGGACTGTTGGAAGCCTCATAGGTAGGGTGCATGCAGCTTATTAAATGTGT	exon sense-overlapping	NM_015726	DCAF8	DDB1- and CUL4-associated factor 8	-	160185504	160232350
ASHG19A3A043894	529.162	279.882	8.95233	8.21612	noncoding	ENST00000399501	RP11-292F22.3	Ensembl	1273	chr10	+	47594378	47595651		TATGTAACACTGGACACTTTGAGGTGGAGATCAATGTCAAGTGGCTCAGTGAGAACCCTT	intergenic
ASHG19A3H0000155	361.349	322.295	8.4079	8.42196	noncoding	nc-HOXC8-150-	nc-HOXC8-150	HOX cluster	723	chr12	+	54402165	54402888		TGATGCCTGAAGTATTTGGGAGTATGGTGTGCTTGTTCCTCCTCAAAGTCTCCAGACTTA	intergenic
ASHG19A3A012416	169.964	107.2	7.32427	6.82288	noncoding	BC024172		misc_RNA	1330	chr1	-	231497489	231498781		GTTTAGTTTTGTTCGAGTGGCTAAATCAACTTGTCTGTGGTTGTTAAGAAAAACAGTAGT	intergenic
ASHG19A3A049940	241.354	206.97	7.82942	7.77975	noncoding	ENST00000418454	HMGA1L6	Ensembl	1082	chr13	+	23708312	23709394		TTCACTATTCCCTCTGGCTTCCCAATAGTGGGGACTGGGAGGGTTCCCCTGGCCTGAAAA	intergenic
ASHG19A3A000147	1656.97	1616.3	10.6059	10.7459	noncoding	ENST00000421181	AC080094.1	Ensembl	201	chr2	+	17151300	17155764		TAACCCTGATACTCCCATGTCTCAAAAGTTCTCATTCTTCTCCTTCCTGCTGCCACATGA	intergenic
ASHG19A3A030158	147.209	123.466	7.11861	7.03208	noncoding	ENST00000436798	XXyac-YX155B6.2	Ensembl	1537	chr1	+	147552867	147566056	NR_024442,NM_014644,ENST00000449715,ENST00000444082,ENST00000420737,	AGATAGTGTCTCTTGTGAGATCAGCGTGCAGCTTCCCTGGCCTTGAAGCCCAAGGCACAG	intergenic
ASHG19A3A038765	641.862	624.504	9.23343	9.37465	noncoding	ENST00000415119	RP11-141J10.2	Ensembl	337	chr9	+	73340955	73345772		CATTCCTGCTGCACCTGCCAGACCCTGCTGACAAAATTTCTGTTTCTCCATTGACCAAAT	intronic antisense	NM_206946	TRPM3	transient receptor potential cation channel	-	73149965	73483974
ASHG19A3A038765	641.862	624.504	9.23343	9.37465	noncoding	ENST00000415119	RP11-141J10.2	Ensembl	337	chr9	+	73340955	73345772		CATTCCTGCTGCACCTGCCAGACCCTGCTGACAAAATTTCTGTTTCTCCATTGACCAAAT	intronic antisense	NM_001007471	TRPM3	transient receptor potential cation channel	-	73149965	73736514
ASHG19A3A038765	641.862	624.504	9.23343	9.37465	noncoding	ENST00000415119	RP11-141J10.2	Ensembl	337	chr9	+	73340955	73345772		CATTCCTGCTGCACCTGCCAGACCCTGCTGACAAAATTTCTGTTTCTCCATTGACCAAAT	intronic antisense	NM_206947	TRPM3	transient receptor potential cation channel	-	73149965	73483974
ASHG19A3A038765	641.862	624.504	9.23343	9.37465	noncoding	ENST00000415119	RP11-141J10.2	Ensembl	337	chr9	+	73340955	73345772		CATTCCTGCTGCACCTGCCAGACCCTGCTGACAAAATTTCTGTTTCTCCATTGACCAAAT	intronic antisense	NM_020952	TRPM3	transient receptor potential cation channel	-	73149965	73483974
ASHG19A3A038765	641.862	624.504	9.23343	9.37465	noncoding	ENST00000415119	RP11-141J10.2	Ensembl	337	chr9	+	73340955	73345772		CATTCCTGCTGCACCTGCCAGACCCTGCTGACAAAATTTCTGTTTCTCCATTGACCAAAT	intronic antisense	NM_206945	TRPM3	transient receptor potential cation channel	-	73149965	73483974
ASHG19A3A038765	641.862	624.504	9.23343	9.37465	noncoding	ENST00000415119	RP11-141J10.2	Ensembl	337	chr9	+	73340955	73345772		CATTCCTGCTGCACCTGCCAGACCCTGCTGACAAAATTTCTGTTTCTCCATTGACCAAAT	intronic antisense	NM_024971	TRPM3	transient receptor potential cation channel	-	73149965	73483974
ASHG19A3A038765	641.862	624.504	9.23343	9.37465	noncoding	ENST00000415119	RP11-141J10.2	Ensembl	337	chr9	+	73340955	73345772		CATTCCTGCTGCACCTGCCAGACCCTGCTGACAAAATTTCTGTTTCTCCATTGACCAAAT	intronic antisense	NM_206944	TRPM3	transient receptor potential cation channel	-	73149965	73483974
ASHG19A3A008654	75.8448	91.2381	6.16562	6.58058	noncoding	HIT000430314		H-invDB	1023	chr17	-	58211983	58213005		TTCCCGGAAAAGTTAAAGCCTTTGAGAAACAAAGCTGAGGTGGGTAACTTAATTAAAAAA	intergenic
ASHG19A3A053991	96.2691	105.477	6.51748	6.79738	noncoding	AF220234		misc_RNA	968	chr16	-	81497496	81498464		AATGAAGGAGAACTCTCCAAGGCCTGCCTTGTTGTCCAACCAACACCTACTTCATTTTTC	intronic antisense	NM_198390	CMIP	C-Maf-inducing protein isoform C-mip	+	81478774	81745367
ASHG19A3A029813	11496.5	18508.6	13.4164	14.2585	noncoding	ENST00000339867	RP3-391O22.3	Ensembl	399	chr6	-	34544034	34544433		TTCATAGCATTTGCTTATTCCGTGAAGTCTAGGGACAGGAAGATGGTTGGTGACCTGACT	intergenic
ASHG19A3A035851	3422.28	2779.7	11.6664	11.5218	noncoding	BC047111		NRED	1825	chr8	-	71022010	71023821		TAGAAGCAAAAGCCAAATCAGTTCCCTTCATTATCAGTATTTCTCATGCTGTACACAATA	intergenic
ASHG19A3A043955	134.939	181.818	6.99299	7.5899	noncoding	ENST00000432986	RP11-564C4.5	Ensembl	1668	chr10	+	52436717	52445819	NM_017561,NM_001170741,NM_001099338,NM_001045477,NM_001009610,	TCATTCATCCCCAATTCCTGGAAGAATTGCTTTCCCCAGATCCACAGATGGATTTCTTGG	intergenic
ASHG19A3A010455	142.425	124.801	7.06932	7.04678	noncoding	uc002knb.2	BC040631	UCSC_knowngene	2044	chr18	+	6256745	6260932		GCTCCTTCTTGGAAAGCTGACATGAACCATCTGCCTTTTTGATTATATTAAAACCTATTT	intronic antisense	NM_173464	L3MBTL4	lethal(3)malignant brain tumor-like protein 4	-	5954704	6414910
ASHG19A3L0002796	225.846	252.088	7.7343	8.06183	noncoding	BP232819	lincRNA-EPHB1-1	lincRNA	582	chr3	+	134400866	134670682	NM_004441,	CTCGCTTTTCAGGAATTATGGAGCCTGTATGTCTCTTCTTTTCTGTCCGTGTCTTCTTCA	exon sense-overlapping	NM_004441	EPHB1	ephrin type-B receptor 1 precursor	+	134514098	134979307
CUST_350_PI426073487	232.089	301.251	7.77283	8.32508	noncoding	uc.352+	uc.352	UCR	200	chr13	+	72694164	72694364		ACATTTTAAAGGCCAAGTCTAAAATAGATTTGCACCCACGCCCCCAGTGTGAATTTTTCA	intergenic
ASHG19A3A029580	464.76	680.199	8.76581	9.49666	noncoding	uc003nkf.2	CR606685	UCSC_knowngene	683	chr6	-	28046572	28048908		CCCAGTGGAACTCAGATATTCAAAATGGTATTAATTAAAACCACTGGCTGTCATTGGTCC	natural antisense	NM_003447	ZNF165	zinc finger protein 165	+	28048481	28057340
ASHG19A3A012829	25118.8	24421.1	14.5528	14.6433	noncoding	ENST00000503632	AC011551.1	Ensembl	1002	chr19	+	47061897	47062899		GGACCTGACCTGCCATCTGGGAAAACCCTGCCAAATATGATGATGTCAAGAAAATGATGA	intronic antisense	NM_001205281	LOC100506012	serine/threonine-protein phosphatase 5-like	-	46984044	47104457
ASHG19A3A040396	1470.25	1547.65	10.4368	10.6768	noncoding	ENST00000451431	RP1-23K20.2	Ensembl	401	chrX	-	130115563	130173820		AAGCCCTCTCTCTCTAAAGACTTGAATGCCTACTCCCTTCACTGAGTGGTTTCTTCTGTT	intergenic
ASHG19A3A030145	194.163	150.014	7.5172	7.31443	noncoding	DQ656037		misc_RNA	391	chr6	-	74171806	74176311		CTTCCCTCATTAAATGTCCCTTTCCGATGCCACCAAAGGAAGGATTACATGACATCTGAC	natural antisense	NM_012123	MTO1	"protein MTO1 homolog, mitochondrial isoform a"	+	74171453	74211179
ASHG19A3A030145	194.163	150.014	7.5172	7.31443	noncoding	DQ656037		misc_RNA	391	chr6	-	74171806	74176311		CTTCCCTCATTAAATGTCCCTTTCCGATGCCACCAAAGGAAGGATTACATGACATCTGAC	natural antisense	NM_133645	MTO1	"protein MTO1 homolog, mitochondrial isoform b"	+	74171453	74211179
ASHG19A3A030145	194.163	150.014	7.5172	7.31443	noncoding	DQ656037		misc_RNA	391	chr6	-	74171806	74176311		CTTCCCTCATTAAATGTCCCTTTCCGATGCCACCAAAGGAAGGATTACATGACATCTGAC	natural antisense	NM_001123226	MTO1	"protein MTO1 homolog, mitochondrial isoform c"	+	74171453	74211179
ASHG19A3A038491	244.918	184.235	7.84975	7.60926	noncoding	ENST00000432077	RP11-384P7.3	Ensembl	417	chr9	+	33695708	33696125		ATACTATAGCATCTTTTCTCCTGACCCTGAAGTCTGCTAGCACCAACCAGACATGTGTGT	intergenic
ASHG19A3A040304	571.084	515.739	9.05938	9.10567	noncoding	ENST00000424316	RP11-517D11.3	Ensembl	1510	chrX	-	115238173	115239683	NM_001142931,	CCCAGTGGGAAATATAGCAGCAATTTGAGCAACTTTAATTATGAGAGGAGCCTTCAGGGG	intergenic
ASHG19A3A010086	270.519	172.338	7.99756	7.51299	noncoding	NR_027022	LOC127841	RefSeq_NR	1290	chr1	-	204337557	204338847		TTCCTTGCTCACACTGAGATTCTGTGATTCTCCTCTGAGCATTTCCATGGATAATTTTTT	intergenic
ASHG19A3A037201	241.962	164.954	7.83362	7.44895	noncoding	uc003zpr.2	CR627240	UCSC_knowngene	4804	chr9	-	23500689	23672385		GTCAAGTGACTCTTAGCTTGCGCTGTTGTCATCCTCTCTGGACTATTGCTACATTTCTAG	intergenic
ASHG19A3A049124	57565.2	62965.3	15.7921	15.9618	noncoding	ENST00000485633	RP11-614L17.1	Ensembl	492	chr12	+	121354547	121355039	ENST00000374520,	TATAATGTTGATGGCCACCACCCTCAAGACATCATAGATGACATCAACAGTGGTGCTGTG	intergenic
ASHG19A3A037941	2310.79	2245.35	11.0841	11.2227	noncoding	ENST00000398764	RP11-18B16.1	Ensembl	423	chr9	-	116521276	116521699		AAGTGTATTCTTCACTGATTTGCCAATTAGTCAGGTCCCCAGTGTGAACGTTTCCTGGAG	intergenic
ASHG19A3L0000017	503.926	424.674	8.8804	8.82491	noncoding	CR738423	lincRNA-CTTNBP2NL-1	lincRNA	700	chr1	+	112548412	112550748		ACCCAGGCCTTCAACTCCTAGCTACGGCCCCTTCCTGGAAAAATATCTGTTAGATTAAAA	intergenic
ASHG19A3A045517	96.5567	192.157	6.52252	7.66874	noncoding	AF074986		misc_RNA	627	chr11	-	76493622	76494248		TCTGGTTAGAGTTCTAAGAAGGGAAACTGGCGTGTGAGTAGGCAGCAGTTTCAGTCTATT	bidirectional	NM_015516	TSKU	tsukushin precursor	+	76494284	76509198
ASHG19A3L0003537	73.1851	65.1768	6.11388	6.10585	noncoding	CR615581	lincRNA-ANGPT4	lincRNA	1325	chr20	+	825766	838103		AGAGTGAAAATGCTAAGGAGAAAAATGAAGCAGGGAAGGATGGGGAACTAGAGATTTTTT	exon sense-overlapping	NM_031424	FAM110A	hypothetical protein LOC83541	+	825284	826922
ASHG19A3L0003537	73.1851	65.1768	6.11388	6.10585	noncoding	CR615581	lincRNA-ANGPT4	lincRNA	1325	chr20	+	825766	838103		AGAGTGAAAATGCTAAGGAGAAAAATGAAGCAGGGAAGGATGGGGAACTAGAGATTTTTT	exon sense-overlapping	NM_001042353	FAM110A	hypothetical protein LOC83541	+	814355	826922
ASHG19A3L0003537	73.1851	65.1768	6.11388	6.10585	noncoding	CR615581	lincRNA-ANGPT4	lincRNA	1325	chr20	+	825766	838103		AGAGTGAAAATGCTAAGGAGAAAAATGAAGCAGGGAAGGATGGGGAACTAGAGATTTTTT	exon sense-overlapping	NM_207121	FAM110A	hypothetical protein LOC83541	+	816710	826922
ASHG19A3A050799	6387.37	4001.42	12.555	12.0417	noncoding	AK022936		misc_RNA	2867	chr14	-	54890278	54893145		CCCTTAAGTAGCCCTACCTTACTCCTTAGAGCTTATTTTGCTTTTGTATTTAATAAAAGC	intergenic
ASHG19A3A055253	463.124	500.74	8.76018	9.0655	noncoding	uc004dio.1	AK094108	UCSC_knowngene	1897	chrX	+	47566589	47596027		AATGATCTCTCCAACTATTCTCTGAACTTGCCACATCAATAACATCCTTCCCCAGCACAT	intergenic
ASHG19A3A032768	203.588	206.323	7.58559	7.77499	noncoding	ENST00000433266	RP11-111G20.1	Ensembl	537	chr7	-	45431072	45431738		CTTTGTCAACCCTCCAGTAGCCGCCTTTATGCCCGTACGGGTTTCCTATTTCAGCGGTAG	intergenic
ASHG19A3A032842	282.762	302.191	8.05918	8.33083	noncoding	ENST00000417282	RP11-700P18.2	Ensembl	849	chr7	-	56372370	56373219		CCACACACAAGTCAGATCGTCAGCATGAGAAAAAGAAAGAAAAGGAGTGTGAAGAATTTG	intergenic
ASHG19A3A051165	308.762	135.673	8.18413	7.16505	noncoding	CR606271		misc_RNA	1189	chr1	-	145590668	145591854		TATTAGGGGTGCTACAGTAGAAGAGTAAACACTATGTACAGAGAGGCCAGAAAGGGAAAA	intergenic
ASHG19A3A038523	2926.79	2883.11	11.4237	11.5747	noncoding	ENST00000423138	RP11-156G14.1	Ensembl	2257	chr9	+	35433702	35482206		AATTCATGACCTTCTTTTGCTTTTGCCTCTGTGGATGAAAACCCTATCCCCCATGCTCTG	intergenic
ASHG19A3A022462	261.458	195.174	7.94679	7.69054	noncoding	ENST00000426017	RP11-191G24.1	Ensembl	362	chr1	+	51984054	52027301		CAGCAGAAGCAGCGTAAAGTATTGGAACTTTGAATCTGACATCAGAAAGACCTGCACTCA	intronic antisense	NM_001981	EPS15	epidermal growth factor receptor substrate 15	-	51819934	51984995
ASHG19A3A022766	736.874	766.07	9.43419	9.67249	noncoding	ENST00000481312	CTD-2230D16.1	Ensembl	1970	chr3	+	64670803	64997143	uc003dml.2,	GATTTGTATATTTTCGCTTTCTCCTCAAGTAACACCTGGACCTGCTCCTTTCCCTTCAAA	intronic antisense	NM_182920	ADAMTS9	A disintegrin and metalloproteinase with	-	64501330	64673365
ASHG19A3A025250	128.178	95.2741	6.92265	6.64613	noncoding	uc001dla.1	AK125723	UCSC_knowngene	1950	chr1	+	85742397	85865646		TCTGGTTACATGATCCATGCTGCCTTCTGTAGTCACATATTATTTGTGATAACAAACAAG	natural antisense	NM_003921	BCL10	B-cell lymphoma/leukemia 10	-	85731459	85742587
ASHG19A3A025250	128.178	95.2741	6.92265	6.64613	noncoding	uc001dla.1	AK125723	UCSC_knowngene	1950	chr1	+	85742397	85865646		TCTGGTTACATGATCCATGCTGCCTTCTGTAGTCACATATTATTTGTGATAACAAACAAG	intronic antisense	NM_012137	DDAH1	"N(G),N(G)-dimethylarginine"	-	85784167	85930889
ASHG19A3A025250	128.178	95.2741	6.92265	6.64613	noncoding	uc001dla.1	AK125723	UCSC_knowngene	1950	chr1	+	85742397	85865646		TCTGGTTACATGATCCATGCTGCCTTCTGTAGTCACATATTATTTGTGATAACAAACAAG	intronic antisense	NM_001134445	DDAH1	"N(G),N(G)-dimethylarginine"	-	85784167	86044046
ASHG19A3A024045	86.5605	106.123	6.3551	6.80766	noncoding	ENST00000506878	RP11-415C15.1	Ensembl	482	chr4	-	27135617	27141673		CGAAGGCTGCTGCACAAAGAAGAGTAAACCAGATTCTGCCCCAAAAGACTAGCTAAAGAG	intergenic
ASHG19A3A053272	161.014	150.639	7.25019	7.31994	noncoding	ENST00000423422	RP11-336K24.4	Ensembl	420	chr1	-	155955165	155976861		TGTCATCCATCTGCTGGCCCTTTGGACCACTCGGCCACTGGCATGCTTTCCAAGTCTGTA	intergenic
ASHG19A3A036203	124.463	159.913	6.88057	7.40589	noncoding	NR_026913	LOC100133669	RefSeq_NR	709	chr8	-	144063447	144099807		GATCCTGCTACCAGGTTATGATAGATTTTATGGTATGTCTCAAGATATTGAGATAAAGGT	bidirectional	NM_001127213	LY6E	lymphocyte antigen 6E precursor	+	144099901	144103827
ASHG19A3A036203	124.463	159.913	6.88057	7.40589	noncoding	NR_026913	LOC100133669	RefSeq_NR	709	chr8	-	144063447	144099807		GATCCTGCTACCAGGTTATGATAGATTTTATGGTATGTCTCAAGATATTGAGATAAAGGT	bidirectional	NM_002346	LY6E	lymphocyte antigen 6E precursor	+	144099901	144103827
ASHG19A3A024647	9706.35	12426.6	13.169	13.6719	noncoding	ENST00000441170	AC092661.2	Ensembl	1663	chr4	-	118495666	118497329		AGACATGGTGAATGCATCGACTGGAAGCTCCTTTTTCTCCACCTCTCTCAATACATTCCT	intergenic
ASHG19A3A014896	110217	127611	16.7633	16.9432	noncoding	ENST00000415349	AC125238.4	Ensembl	1299	chr2	-	204629017	204630316	ENST00000402024,	CCAACAGTGGATGGCAAAGTGGTGTCTGAGACCAATGACACCAAAGTTCTGAGACATTAA	intergenic
ASHG19A3A023590	685.001	548.68	9.33015	9.19595	noncoding	BC065823		misc_RNA	1733	chr3	+	180333676	180335394		GCTCCTCCGTTTCTTTACTTAGTTGAAATGAATAAGCCTGCTTCTCTGATAACTTTTCTT	natural antisense	NM_181426	CCDC39	coiled-coil domain-containing protein 39	-	180331795	180397283
ASHG19A3A019024	62.7403	88.6698	5.89221	6.54115	noncoding	BC010113		misc_RNA	837	chr21	-	47865711	47866530		CTTACGAGTTTAACATAAACTCTCTGCTCAATTTTTTAGTCAGTGAGAAAGGCAAACTGA	intergenic
ASHG19A3A016325	254.807	280.343	7.91202	8.21824	noncoding	uc010fmf.1	AK311291	UCSC_knowngene	1086	chr2	+	129622178	129626301		GCTGATCTACCTCACACTCCAATTCAATTCAGTCCTTTCAGTTGCTTAAGGAAATCAGCA	intergenic
ASHG19A3A018897	16592.2	13673.7	13.9473	13.811	noncoding	NR_002909	SNHG3	RefSeq_NR	939	chr1	+	28832495	28836145	AJ006834,	GCCAGAAGGCACACTGTGTTGGTGGTTATATTAAAAGTCCTTGAGTATTTTGCTTTTCAT	exon sense-overlapping	NM_001048199	RCC1	regulator of chromosome condensation isoform c	+	28832454	28865708
ASHG19A3A025478	52.9039	67.7177	5.63974	6.1609	noncoding	ENST00000512678	RP11-328N19.1	Ensembl	2622	chr4	+	44019078	44024080		TTATGAACTTAGTTCCCCAGTCACCAGGGCCACAGATGTTTGAAATACTTTTCTGTCTTT	intergenic
ASHG19A3A017298	270.317	171.085	7.99636	7.50248	noncoding	AF086501		misc_RNA	475	chr20	-	3904036	3904502		ACAGCAAATCCTCACACTGCCTGGACATGTGCCACTTTTTTGTTGTTTTTAATATATTTT	natural antisense	NM_153638	PANK2	"pantothenate kinase 2, mitochondrial isoform 1"	+	3869741	3904502
ASHG19A3A017298	270.317	171.085	7.99636	7.50248	noncoding	AF086501		misc_RNA	475	chr20	-	3904036	3904502		ACAGCAAATCCTCACACTGCCTGGACATGTGCCACTTTTTTGTTGTTTTTAATATATTTT	natural antisense	NM_024960	PANK2	"pantothenate kinase 2, mitochondrial isoform 2"	+	3869485	3904502
ASHG19A3A017298	270.317	171.085	7.99636	7.50248	noncoding	AF086501		misc_RNA	475	chr20	-	3904036	3904502		ACAGCAAATCCTCACACTGCCTGGACATGTGCCACTTTTTTGTTGTTTTTAATATATTTT	natural antisense	NM_153640	PANK2	"pantothenate kinase 2, mitochondrial isoform 2"	+	3870462	3904502
ASHG19A3A035242	5404.23	3063.82	12.3209	11.658	noncoding	ENST00000421443	RP11-307I2.1	Ensembl	426	chr7	+	143493387	143493813	ENST00000411508,	AGATTCTTGAACGGAAAGCCAAATCTTAGCAAGTAGGAAGGGAAAGGGGCAAATACAAGG	intergenic
ASHG19A3A048822	223.696	181.912	7.72161	7.59088	noncoding	ENST00000432195	RP4-575N6.4	Ensembl	403	chr1	-	101701238	101702084		CCGGCAGATGTGAACTCAAAAACTTCCTCCGCTGTGCAGTTTCAATTGGCAGACACACCC	bidirectional	NM_001400	S1PR1	sphingosine 1-phosphate receptor 1	+	101702304	101707076
ASHG19A3A038678	1176.9	1143.67	10.1195	10.246	noncoding	ENST00000450704	RP11-211N8.2	Ensembl	1549	chr9	+	46843637	46846025	uc004aeg.3,uc004acc.3,uc004aby.2,NR_015363,ENST00000430302,ENST00000377613,	AATCTGGACCCGAATCCACCCATTGCCCATTTTCCGCTGCCGCTGGAGAGAATCTCTGAG	intergenic
ASHG19A3A007575	264.596	250.138	7.96579	8.05084	noncoding	NR_027755	LOC283867	RefSeq_NR	1776	chr16	-	65318401	65610203		TTCCCCTTCGTCTTCCACCATGAATAACAGAATGGCAATTTTCGTGTGGTGTTAATTTCC	intergenic
ASHG19A3A016347	76.6045	74.79	6.17966	6.30366	noncoding	ENST00000422855	AC068137.11	Ensembl	651	chr2	+	131040251	131040902	ENST00000424905,	CTAATATCAGCTACTCCATATGTCGGGACTGACCTTGCCCAGTGAATCTGAGGTGATTTT	intergenic
ASHG19A3A021231	10074	8481.92	13.2266	13.1215	noncoding	ENST00000461635	RP11-436J20.1	Ensembl	651	chr3	-	68682856	68683507		GAGAGTTGGACAAGGATATGGAGTTTGGTCTCATTGATCACCAAAAAGCAACCAACTTAG	intergenic
ASHG19A3A019992	635.267	905.108	9.21459	9.90528	noncoding	ENST00000373226	RP11-435D7.3	Ensembl	539	chr1	+	36204989	36209177		GGAAGTACTTCATCAATTACGTCCTCTTCATATTCATCAATTTCTTCCCCATCATACTCA	natural antisense	NM_001190481	CLSPN	claspin isoform 2	-	36197712	36235551
ASHG19A3A019992	635.267	905.108	9.21459	9.90528	noncoding	ENST00000373226	RP11-435D7.3	Ensembl	539	chr1	+	36204989	36209177		GGAAGTACTTCATCAATTACGTCCTCTTCATATTCATCAATTTCTTCCCCATCATACTCA	natural antisense	NM_022111	CLSPN	claspin isoform 1	-	36197712	36235551
ASHG19A3A019415	287.029	306.87	8.08037	8.3539	noncoding	ENST00000421957	LA16c-68B10.4	Ensembl	1288	chr22	-	16909689	16957613	NM_139173,NM_001100874,	TGGGGGAAAAATTTTACAACTCATTAGAATACCTTTAGTGCCTCCACTTCCACCTCTTCT	intergenic
ASHG19A3A026321	764.192	747.863	9.48969	9.63684	noncoding	ENST00000507483	RP11-440I14.3	Ensembl	792	chr4	+	175457790	175461935		AAGGTGACCATATCCCTCCTATCAAATACTGTCACTCATTTACATCTTTGCCAAATGTGG	intergenic
ASHG19A3A030476	65.178	94.3249	5.94925	6.63323	noncoding	ENST00000439075	RP11-510H23.1	Ensembl	4507	chr6	-	125230238	125284185	NR_026876,	TGTGTGCATGAAATTCTACAGGCATATGGGGTCGTGATCTGCTAATCTCCAGTTATTATA	intergenic
ASHG19A3A026153	176.063	211.834	7.37536	7.81215	noncoding	AF088025		misc_RNA	655	chr4	+	152328664	152329301		AAGTTTCTCATTCCTCCTCTGAGATTTAAAGTCCATCACTTCGCGACTCAAACACGCAAG	intergenic
ASHG19A3A010614	22593.4	21780.8	14.3849	14.4878	noncoding	ENST00000423619	RP11-54O7.10	Ensembl	156	chr1	-	943453	943609		AATAAAATCAGGTACAACTCCCAAAGGAGACACTGGAGAACAGCCAAGCTGGGTCTGTAA	intergenic
ASHG19A3L0001378	432.281	141.722	8.66457	7.22673	noncoding	AJ493605	lincRNA-C3orf35	lincRNA	981	chr3	+	37427759	37459039	NM_178342,	AAGGTGATTGCATGCTGGTGTCTTTAGCTAAAAATAAAGTTAATGTCTTTGGGGCAATCA	exon sense-overlapping	NM_178342	C3orf35	AP20 region protein 1 isoform E	+	37440967	37459865
ASHG19A3L0001378	432.281	141.722	8.66457	7.22673	noncoding	AJ493605	lincRNA-C3orf35	lincRNA	981	chr3	+	37427759	37459039	NM_178342,	AAGGTGATTGCATGCTGGTGTCTTTAGCTAAAAATAAAGTTAATGTCTTTGGGGCAATCA	exon sense-overlapping	NM_178339	C3orf35	AP20 region protein 1 isoform B	+	37440967	37476988
ASHG19A3A017176	11264.1	8702.51	13.3868	13.1581	noncoding	NR_026923	LOC643387	RefSeq_NR	2660	chr2	+	239140326	239142983	NM_007375,	GTGTCACAGTTTGGTTCTTTTGTTTTGTTTTTTAACACTTGTCTCCCCTCAAACACAAAA	intergenic
ASHG19A3A052899	4882.86	3423.66	12.1782	11.8178	noncoding	ENST00000503512	AC090971.2	Ensembl	2073	chr15	+	52205350	52207919		CAGCACAGTGAAGTTTCTTTTGAAGACTATGTACTGGAAGCATTTAGAACTTACCAATAT	intergenic
ASHG19A3A043754	16359.5	16563.4	13.9347	14.0803	noncoding	HIT000049806		H-invDB	2121	chr10	+	29783527	29785652		GCAGGGAGATGCAAATTACAAAATGTTAAAACAAAACAAAGATCTCCCCCATAGCTCTTT	natural antisense	NM_021738	SVIL	supervillin isoform 2	-	29746276	29923901
ASHG19A3A043754	16359.5	16563.4	13.9347	14.0803	noncoding	HIT000049806		H-invDB	2121	chr10	+	29783527	29785652		GCAGGGAGATGCAAATTACAAAATGTTAAAACAAAACAAAGATCTCCCCCATAGCTCTTT	natural antisense	NM_003174	SVIL	supervillin isoform 1	-	29746276	30024730
ASHG19A3L0001033	113.087	80.0944	6.74656	6.40027	noncoding	chr2:107718693-107737818+	lincRNA-RGPD4-2	lincRNA	19126	chr2	+	107718693	107737818		AATACAATGTTGATTCTGTTACTATGCTTGACATTGCCTTTTCACTACCCAGCTTTTCTA	intergenic
ASHG19A3H0000030	2244.92	2311.04	11.0394	11.264	noncoding	nc-HOXA6-70-	nc-HOXA6-70	HOX cluster	178	chr7	-	27191677	27191855		CACCCAGGGAGGCTTTAAGAGGGGCATACTCCCCCTTACCCATACTCACCCATTCACACT	intergenic
ASHG19A3A034460	904.787	596.397	9.73272	9.31278	noncoding	ENST00000441415	RP11-460N20.5	Ensembl	586	chr7	+	64544480	64560610	ENST00000414608,	GGAATCGCAAGGCTGGAAAACATCATTCAAGTGGGCAATCGAATTAAATTTCTTATTAAA	intergenic
ASHG19A3A012832	1068.49	831.94	9.97773	9.78902	noncoding	BC000986		misc_RNA	1240	chr19	+	47291071	47292296		TGAGTTTGGTCTTTAGTCGCCTCTGAGAACTTTAATTCCTCGAATATAAAGTGCAGGTGT	natural antisense	NM_005628	SLC1A5	neutral amino acid transporter B(0) isoform 1	-	47278139	47291842
ASHG19A3A012832	1068.49	831.94	9.97773	9.78902	noncoding	BC000986		misc_RNA	1240	chr19	+	47291071	47292296		TGAGTTTGGTCTTTAGTCGCCTCTGAGAACTTTAATTCCTCGAATATAAAGTGCAGGTGT	bidirectional	NM_001145144	SLC1A5	neutral amino acid transporter B(0) isoform 2	-	47278139	47290545
ASHG19A3A029096	93.3525	77.8619	6.4699	6.36246	noncoding	uc003lxs.1	AK097548	UCSC_knowngene	1580	chr5	+	158758525	158789842		TAATTATCCCAGGTCACACTTCTCTCTGGGCTTACCCTGGGAATCAGATGATTGAGCTTT	intergenic
ASHG19A3A007237	2663.59	1819.57	11.2915	10.9214	noncoding	NR_024123	PBX3	RefSeq_NR	2556	chr9	+	128509616	128729653		AATTCGCCCACCACACCAAATTCCGGTGGATACCCTCCGTCATGTTATCAATCAGACGGG	exon sense-overlapping	NM_006195	PBX3	pre-B-cell leukemia transcription factor 3	+	128509616	128729655
ASHG19A3A007237	2663.59	1819.57	11.2915	10.9214	noncoding	NR_024123	PBX3	RefSeq_NR	2556	chr9	+	128509616	128729653		AATTCGCCCACCACACCAAATTCCGGTGGATACCCTCCGTCATGTTATCAATCAGACGGG	exon sense-overlapping	NM_001134778	PBX3	pre-B-cell leukemia transcription factor 3	+	128510477	128729655
ASHG19A3A018639	284.729	252.466	8.06893	8.06418	noncoding	uc002yjw.1	CR614803	UCSC_knowngene	1716	chr21	-	16195289	16230029		TGTGAAGTCCCTGGTGGTTTCCTAGATGACTACACAGTTGAGTTGCCTCTGATTGGAAAA	intergenic
ASHG19A3A035595	222.272	149.295	7.71245	7.30783	noncoding	AK125621		misc_RNA	2750	chr8	-	22471420	22474170		TCTCAAGGAAGCTAGATCAGATCTGACCACTTAATTTACAAACTCTAGATGGCAAAAGTC	natural antisense	NM_021174	KIAA1967	p30 DBC protein	+	22462538	22477983
ASHG19A3A050310	186.865	166.34	7.46207	7.46144	noncoding	uc001vjy.1	AX747676	UCSC_knowngene	1167	chr13	+	76445173	76457947		TCTCTGAATCGGATTTTCCTGGCTGTAGAGACCAGATCAACCCTTCCATTCCATCGATTT	intergenic
ASHG19A3A042715	460.038	352.43	8.75238	8.55252	noncoding	ENST00000417888	CTGLF8P	Ensembl	363	chr10	-	46717126	46733073	NR_029396,NM_001144000,NM_001077685,NM_001077665,ENST00000436180,ENST00000399470,ENST00000339771,	TTTAACCCTTCTGCCAATCCAGAGGCAAACACAATATTCCAGAGGAACTCTCAAACAGAT	intergenic
ASHG19A3A034017	399.219	474.45	8.54993	8.98489	noncoding	uc003sun.1	BC043576	UCSC_knowngene	1526	chr7	+	19183915	19185876		TTCCTTTCCCTACCTTTACCTCCTACTCATATAAAATAGAGGATTTTATTCCAAGAGGAA	natural antisense	NM_152898	FERD3L	fer3-like protein	-	19184404	19185044
ASHG19A3A045696	15665.3	15186	13.8674	13.9645	noncoding	ENST00000393026	AP002884.1	Ensembl	1074	chr11	-	112138012	112139094	NM_003932,ENST00000456632,ENST00000439405,ENST00000417082,	AACCCAAAGGTTATGAATCTTATCAGTAAATTGTCAGCCAAATTTGGAGGTCAAGAGTAA	intergenic
ASHG19A3A034138	126.784	161.798	6.90705	7.42247	noncoding	G36719		misc_RNA	454	chr7	+	30554993	30555447		AACCTGCTAGATCCCACAGCCAACCTTAATAGTCACTTTTGAAAAGTCCTGGAAATACAA	intergenic
ASHG19A3A036254	244.602	223.71	7.84791	7.88772	noncoding	BC047297		misc_RNA	1321	chr8	-	145592594	145596538		AAACCCTGTGTTCCCAGTCTCTTTGGTCTCCAGAACTGTCATTAAAGAAAGAAGGGGCTA	intergenic
ASHG19A3A035711	1778.51	1594.59	10.7118	10.7243	noncoding	ENST00000476002	RP11-479P21.1	Ensembl	1164	chr8	-	39015056	39016220		TTCATCAAGGATGGCAAATTGATCAGTGCCTCCACTGACTATAACCTGACAAGAGCATCA	intronic antisense	NM_145004	ADAM32	disintegrin and metalloproteinase	+	38965049	39142436
ASHG19A3A014725	86869.8	102357	16.4115	16.6338	noncoding	ENST00000397031	KRT18P29	Ensembl	1267	chr2	-	182825938	182827205		ATGATGACTTCAATCTTGGTGATGCCCTGGACAACAGCAACTCCATGCAAACCATCCAAA	intergenic
ASHG19A3A041095	467.8	773.208	8.77623	9.68485	noncoding	ENST00000422965	RP3-323B6.2	Ensembl	589	chrX	+	64627963	64628552	NM_005077,	TACGAAATGCCATATGGATTAAACATTGAAATGCACAAACAGACTGAAATCGCCAAGAGA	intergenic
ASHG19A3A025076	93.8825	115.497	6.47801	6.9313	noncoding	ENST00000503355	RP11-701P16.3	Ensembl	464	chr4	-	185832042	185832506		TGATGGGAATGTTCAACCTCTTCTCCTACATTGGTGCAAGACAAAATGAAGCCTTCACAA	intergenic
ASHG19A3A020754	2043.77	2179.03	10.9068	11.1805	noncoding	ENST00000430166	AC090937.2	Ensembl	1184	chr3	-	14961853	14989931		AATCCACATATTGGAAAATGGTGCCCGAACCTCTGTTTCCTCCCTCCATGGAGTGAATAA	intronic antisense	NM_003298	NR2C2	nuclear receptor subfamily 2 group C member 2	+	14989235	15090780
ASHG19A3A020754	2043.77	2179.03	10.9068	11.1805	noncoding	ENST00000430166	AC090937.2	Ensembl	1184	chr3	-	14961853	14989931		AATCCACATATTGGAAAATGGTGCCCGAACCTCTGTTTCCTCCCTCCATGGAGTGAATAA	natural antisense	NM_152536	FGD5	"FYVE, RhoGEF and PH domain-containing protein 5"	+	14860468	14976072
ASHG19A3A054136	245.34	323.204	7.85235	8.42598	noncoding	uc010bra.1	AL360260	UCSC_knowngene	2036	chr16	+	767618	769654		TTCTCATGAGACACAGGGCCACAGGAGCACCACGGTGCCCAAATGGGTCTTGGAGCATTA	intergenic
ASHG19A3A019753	90693.3	105395	16.4914	16.6765	noncoding	ENST00000413110	WI2-80423F1.1	Ensembl	372	chr22	-	36817317	36817689	NM_001030009,NM_001019,ENST00000492525,ENST00000470580,ENST00000457423,ENST00000449183,ENST00000419498,ENST00000403958,	ATCATGGACCATGAAGAAGCAAGACAAAACCACACAGGAGGGAAAATCCTGGGATTCTTT	intergenic
ASHG19A3A027518	2204.04	2415.06	11.0131	11.3239	noncoding	ENST00000511085	AC005740.4	Ensembl	419	chr5	-	141416271	141416690		AATCAAGATTGGACAACCCACTGTTTCCTACTTCGTGAAGGCAGCAGCTGGGATTGAAAA	intergenic
ASHG19A3A033312	87693.6	98530.2	16.4354	16.5744	noncoding	NR_026660	RPL19P12	RefSeq_NR	1134	chr7	-	102781716	102782850		TGTACATACTGGCCTCCGTGATTACATAGATCAGCCATTAAAGTAAAATAAGCCTTTATC	intron sense-overlapping	NM_198990	NAPEPLD	N-acyl-phosphatidylethanolamine-hydrolyzing	-	102740022	102789569
ASHG19A3A033312	87693.6	98530.2	16.4354	16.5744	noncoding	NR_026660	RPL19P12	RefSeq_NR	1134	chr7	-	102781716	102782850		TGTACATACTGGCCTCCGTGATTACATAGATCAGCCATTAAAGTAAAATAAGCCTTTATC	intron sense-overlapping	NM_001122838	NAPEPLD	N-acyl-phosphatidylethanolamine-hydrolyzing	-	102740022	102789569
ASHG19A3A037881	862.37	810.94	9.66196	9.75198	noncoding	NR_026918	PTPN3	RefSeq_NR	5504	chr9	-	112137973	112180063		AAGTGGGATGAACAGCCAGAAAAGCAGCCCCCACCACCTCTGTTAGGTGGGAGACCTCTT	exon sense-overlapping	NM_001145370	PTPN3	tyrosine-protein phosphatase non-receptor type 3	-	112137973	112213664
ASHG19A3A037881	862.37	810.94	9.66196	9.75198	noncoding	NR_026918	PTPN3	RefSeq_NR	5504	chr9	-	112137973	112180063		AAGTGGGATGAACAGCCAGAAAAGCAGCCCCCACCACCTCTGTTAGGTGGGAGACCTCTT	exon sense-overlapping	NM_001145372	PTPN3	tyrosine-protein phosphatase non-receptor type 3	-	112137973	112191323
ASHG19A3A037881	862.37	810.94	9.66196	9.75198	noncoding	NR_026918	PTPN3	RefSeq_NR	5504	chr9	-	112137973	112180063		AAGTGGGATGAACAGCCAGAAAAGCAGCCCCCACCACCTCTGTTAGGTGGGAGACCTCTT	exon sense-overlapping	NM_001145369	PTPN3	tyrosine-protein phosphatase non-receptor type 3	-	112137973	112213664
ASHG19A3A037881	862.37	810.94	9.66196	9.75198	noncoding	NR_026918	PTPN3	RefSeq_NR	5504	chr9	-	112137973	112180063		AAGTGGGATGAACAGCCAGAAAAGCAGCCCCCACCACCTCTGTTAGGTGGGAGACCTCTT	exon sense-overlapping	NM_002829	PTPN3	tyrosine-protein phosphatase non-receptor type 3	-	112137973	112260593
ASHG19A3A037881	862.37	810.94	9.66196	9.75198	noncoding	NR_026918	PTPN3	RefSeq_NR	5504	chr9	-	112137973	112180063		AAGTGGGATGAACAGCCAGAAAAGCAGCCCCCACCACCTCTGTTAGGTGGGAGACCTCTT	exon sense-overlapping	NM_001145371	PTPN3	tyrosine-protein phosphatase non-receptor type 3	-	112137973	112191323
ASHG19A3A037881	862.37	810.94	9.66196	9.75198	noncoding	NR_026918	PTPN3	RefSeq_NR	5504	chr9	-	112137973	112180063		AAGTGGGATGAACAGCCAGAAAAGCAGCCCCCACCACCTCTGTTAGGTGGGAGACCTCTT	exon sense-overlapping	NM_001145368	PTPN3	tyrosine-protein phosphatase non-receptor type 3	-	112137973	112260593
ASHG19A3A030639	133.305	107.609	6.97653	6.82906	noncoding	ENST00000404020	RP1-95L4.2	Ensembl	733	chr6	-	143619906	143620639		TAAAAATTAAGATTTCCCTTCTTCTGAGTGCACATACTGTGGCTAGCGACTGTCTTGACC	intronic antisense	NM_016108	AIG1	androgen-induced gene 1 protein	+	143382022	143661441
ASHG19A3A007116	1093.15	1145.63	10.009	10.2483	noncoding	NR_003085	PMS2	RefSeq_NR	2846	chr7	-	6012870	6048737		CCATGGAGCGAGCTGAGAGCTCGAGAACCTGCTAAGGCCATCAAACCTATTGATCGGAAG	exon sense-overlapping	NM_000535	PMS2	mismatch repair endonuclease PMS2 isoform a	-	6012869	6048737
ASHG19A3A007116	1093.15	1145.63	10.009	10.2483	noncoding	NR_003085	PMS2	RefSeq_NR	2846	chr7	-	6012870	6048737		CCATGGAGCGAGCTGAGAGCTCGAGAACCTGCTAAGGCCATCAAACCTATTGATCGGAAG	bidirectional	NM_006303	AIMP2	aminoacyl tRNA synthase complex-interacting	+	6048881	6063465
ASHG19A3A020737	490.003	495.05	8.83956	9.05063	noncoding	uc003byc.1	BC152380	UCSC_knowngene	611	chr3	-	13652923	13653534		TCATAGTTTGCCCTCACCTCTGCTGTAGACAGCCAGCTATCCATCCCAATGTCTGTTTCC	intronic antisense	NM_001165035	FBLN2	fibulin-2 isoform a precursor	+	13610239	13679922
ASHG19A3A020737	490.003	495.05	8.83956	9.05063	noncoding	uc003byc.1	BC152380	UCSC_knowngene	611	chr3	-	13652923	13653534		TCATAGTTTGCCCTCACCTCTGCTGTAGACAGCCAGCTATCCATCCCAATGTCTGTTTCC	intronic antisense	NM_001004019	FBLN2	fibulin-2 isoform a precursor	+	13590624	13679922
ASHG19A3A020737	490.003	495.05	8.83956	9.05063	noncoding	uc003byc.1	BC152380	UCSC_knowngene	611	chr3	-	13652923	13653534		TCATAGTTTGCCCTCACCTCTGCTGTAGACAGCCAGCTATCCATCCCAATGTCTGTTTCC	intronic antisense	NM_001998	FBLN2	fibulin-2 isoform b precursor	+	13590624	13679922
ASHG19A3A023009	3362.9	3669.94	11.6372	11.9198	noncoding	ENST00000498480	RP11-24O5.2	Ensembl	686	chr3	+	113122844	113152839		CTTTGATGTAACTGATTTCTCCCCATCAGTATCCTGATCATCTGGTTCCTTCATTTCCTC	natural antisense	NM_018338	WDR52	WD repeat-containing protein 52 isoform 2	-	113081711	113160361
ASHG19A3A023009	3362.9	3669.94	11.6372	11.9198	noncoding	ENST00000498480	RP11-24O5.2	Ensembl	686	chr3	+	113122844	113152839		CTTTGATGTAACTGATTTCTCCCCATCAGTATCCTGATCATCTGGTTCCTTCATTTCCTC	natural antisense	NM_001164496	WDR52	WD repeat-containing protein 52 isoform 1	-	113005776	113160361
ASHG19A3A040443	96.2635	113.102	6.51739	6.90102	noncoding	ENST00000435108	RP11-239E10.2	Ensembl	613	chr1	+	223317390	223318296		CAAAGCTTTTGCTGAGCAGGAACAGAAGGGTTGTCACTTGCTTTTTTCTCCACTGAAACC	bidirectional	NM_003268	TLR5	toll-like receptor 5 precursor	-	223282747	223316624
ASHG19A3A017439	90.9974	133.173	6.43205	7.13832	noncoding	ENST00000417696	RP11-23O13.1	Ensembl	390	chr20	-	20702316	20703034		GGTGGGAGCTGAAATCAAAGTATGCATTTGTATACATTCTCCTCAATCATCTGTCTCATG	intergenic
ASHG19A3A014442	492.97	593.282	8.84721	9.30572	noncoding	ENST00000422621	AC013437.7	Ensembl	426	chr2	-	143858498	143858924		GGAGAACTTCCACTCCTCAAAGTTGATAACCAAACAATCCTCCCAATAGAAATTCCTATC	intergenic
ASHG19A3A053305	1746.25	1951.91	10.6877	11.0237	noncoding	AF198444		NRED	6376	chr15	+	101449472	101453362		AACCCCTTTGCAGAAATTGCATTTCCTCCCTCTAGTGGCCTGTTTGCATTTGAGTTCTGT	intron sense-overlapping	NM_000693	ALDH1A3	aldehyde dehydrogenase family 1 member A3	+	101420008	101456830
ASHG19A3A030882	436.463	305.481	8.6772	8.34784	noncoding	uc003mts.1	AK023629	UCSC_knowngene	2287	chr6	+	2246031	2284008		AATTCTCGGGCTGTGCTGGGATGGAGATTAGAGGCCAAATAAAAACCTCTGGTAAGTAGT	bidirectional	NM_001500	GMDS	"GDP-mannose 4,6 dehydratase"	-	1624040	2245846
ASHG19A3A024075	230.464	249.923	7.76289	8.0493	noncoding	ENST00000515436	RP11-617D20.1	Ensembl	513	chr4	-	38619907	38621217		TTCTGCCAGTTCCTTGCTCCATAACCCCTAGAAAATTACTTCTGTCTGAGCCTTGGGATT	intergenic
ASHG19A3A025395	35806.5	48078.4	15.0814	15.5867	noncoding	ENST00000507715	RP11-802H3.1	Ensembl	142	chr4	+	33402159	33402301		TTGTGAAGATCTAGATCCGCGACGGGAAGCTGGTGTCCGAGTCCCCTGACGTCCTGCCCA	intergenic
ASHG19A3A045807	43377.5	40908.1	15.3662	15.3609	noncoding	ENST00000497201	RP11-762B21.2	Ensembl	261	chr11	-	122920494	122921061		TGTGTGAGTTGTGCAATTCACAGCAAAGTAGTCAGGAATTAATCTCATGACACCAGCAAG	intergenic
ASHG19A3A051056	556.373	685.133	9.02239	9.50815	noncoding	ENST00000502181	AL121784.1	Ensembl	2379	chr14	-	91613022	91615591		GATTGCTCTCATGGGCCCCCTTCCATTCTGAGTTTCCATGTTTTTGTTGTTTGTGACCTT	natural antisense	NM_001102369	C14orf159	hypothetical protein LOC80017 isoform c	+	91580356	91691703
ASHG19A3A051056	556.373	685.133	9.02239	9.50815	noncoding	ENST00000502181	AL121784.1	Ensembl	2379	chr14	-	91613022	91615591		GATTGCTCTCATGGGCCCCCTTCCATTCTGAGTTTCCATGTTTTTGTTGTTTGTGACCTT	intronic antisense	NM_001102367	C14orf159	hypothetical protein LOC80017 isoform a	+	91580978	91691703
ASHG19A3A051056	556.373	685.133	9.02239	9.50815	noncoding	ENST00000502181	AL121784.1	Ensembl	2379	chr14	-	91613022	91615591		GATTGCTCTCATGGGCCCCCTTCCATTCTGAGTTTCCATGTTTTTGTTGTTTGTGACCTT	natural antisense	NM_001102366	C14orf159	hypothetical protein LOC80017 isoform a	+	91580356	91691703
ASHG19A3A051056	556.373	685.133	9.02239	9.50815	noncoding	ENST00000502181	AL121784.1	Ensembl	2379	chr14	-	91613022	91615591		GATTGCTCTCATGGGCCCCCTTCCATTCTGAGTTTCCATGTTTTTGTTGTTTGTGACCTT	intronic antisense	NM_024952	C14orf159	hypothetical protein LOC80017 isoform a	+	91580356	91691703
ASHG19A3A051056	556.373	685.133	9.02239	9.50815	noncoding	ENST00000502181	AL121784.1	Ensembl	2379	chr14	-	91613022	91615591		GATTGCTCTCATGGGCCCCCTTCCATTCTGAGTTTCCATGTTTTTGTTGTTTGTGACCTT	intronic antisense	NM_001102368	C14orf159	hypothetical protein LOC80017 isoform b	+	91580356	91691703
ASHG19A3A024289	92.5554	90.6906	6.45863	6.57216	noncoding	ENST00000509304	RP11-618I10.4	Ensembl	709	chr4	-	70172184	70172893		GAAGCTACAGGAAACCAACTACGATGTAATGCTTAAAGACCCTGTGATTCCCCATGGAGA	intergenic
ASHG19A3A035539	93258.7	99765.3	16.5275	16.5964	noncoding	ENST00000483613	RP11-303G3.1	Ensembl	781	chr8	-	12427858	12428639	ENST00000483874,ENST00000480160,ENST00000479743,ENST00000442655,ENST00000438784,CR624406,	ACACATGCTAAAGTTGAATGAGCTGATGGATAGGAACCACCAGTCCAAGAATCTGTTTAA	intergenic
ASHG19A3A007687	1006.52	546.01	9.89108	9.1892	noncoding	NR_029403	CCT7	RefSeq_NR	1799	chr2	+	73461363	73480149		TGGACAAGCTTATTGTAGATGGCAGAGTTTCTGAAGCAGGTGAAACCCTATGTGGAGGAA	exon sense-overlapping	NM_001166285	CCT7	T-complex protein 1 subunit eta isoform d	+	73461363	73480150
ASHG19A3A007687	1006.52	546.01	9.89108	9.1892	noncoding	NR_029403	CCT7	RefSeq_NR	1799	chr2	+	73461363	73480149		TGGACAAGCTTATTGTAGATGGCAGAGTTTCTGAAGCAGGTGAAACCCTATGTGGAGGAA	exon sense-overlapping	NM_006429	CCT7	T-complex protein 1 subunit eta isoform a	+	73461363	73480150
ASHG19A3A007687	1006.52	546.01	9.89108	9.1892	noncoding	NR_029403	CCT7	RefSeq_NR	1799	chr2	+	73461363	73480149		TGGACAAGCTTATTGTAGATGGCAGAGTTTCTGAAGCAGGTGAAACCCTATGTGGAGGAA	exon sense-overlapping	NM_001009570	CCT7	T-complex protein 1 subunit eta isoform b	+	73461363	73480150
ASHG19A3A007687	1006.52	546.01	9.89108	9.1892	noncoding	NR_029403	CCT7	RefSeq_NR	1799	chr2	+	73461363	73480149		TGGACAAGCTTATTGTAGATGGCAGAGTTTCTGAAGCAGGTGAAACCCTATGTGGAGGAA	exon sense-overlapping	NM_001166284	CCT7	T-complex protein 1 subunit eta isoform c	+	73461363	73480150
ASHG19A3A037349	395.785	347.918	8.53861	8.53309	noncoding	AK126527		RNAdb	3622	chr9	-	37789033	37792659		GTAGTCTGTCATTTGTGCAGTGATAACTGTGGGCATTTATGTTTTTAGATTAAATCCTGT	intergenic
ASHG19A3A023407	77.3524	205.768	6.19317	7.7706	noncoding	ENST00000460407	RP11-38P22.2	Ensembl	2050	chr3	+	152557178	152559228		TCATAATTGTGGTCACTAGAACTGTACTTACCATGGACAGTTAAAACTGAAAAAGACTCA	intergenic
ASHG19A3A029467	622.255	703.726	9.185	9.54749	noncoding	ENST00000454835	RP3-348I23.3	Ensembl	332	chr6	-	20722558	20723886		GAAGCAAGCATTTTGAACCGGGAGGAGAAAAGAAGAGAAAGAGCCAAATTAACTAGTTCT	intronic antisense	NM_017774	CDKAL1	CDK5 regulatory subunit-associated protein	+	20534687	21232634
ASHG19A3A015384	105.338	92.7548	6.64663	6.60708	noncoding	BC043238		misc_RNA	2474	chr2	+	23281094	23283550		AAATCAAGGGGCCTGTAAATATCACCCTCATACTAACTCTGTGAAGCAGCATTCACCCTG	intergenic
ASHG19A3A012871	2111.64	2586.43	10.9525	11.4295	noncoding	HIT000071394		H-invDB	204	chr19	+	49340354	49340557		AAATTTAGACAGTGTTGAGAAAACCAAACTTTGGCCATAGAAACCATTCCCCTCCCGGGC	bidirectional	NM_016246	HSD17B14	17-beta-hydroxysteroid dehydrogenase 14	-	49316273	49339934
ASHG19A3A012871	2111.64	2586.43	10.9525	11.4295	noncoding	HIT000071394		H-invDB	204	chr19	+	49340354	49340557		AAATTTAGACAGTGTTGAGAAAACCAAACTTTGGCCATAGAAACCATTCCCCTCCCGGGC	natural antisense	NM_001161354	PLEKHA4	pleckstrin homology domain-containing family A	-	49340353	49371884
ASHG19A3A012871	2111.64	2586.43	10.9525	11.4295	noncoding	HIT000071394		H-invDB	204	chr19	+	49340354	49340557		AAATTTAGACAGTGTTGAGAAAACCAAACTTTGGCCATAGAAACCATTCCCCTCCCGGGC	natural antisense	NM_020904	PLEKHA4	pleckstrin homology domain-containing family A	-	49340353	49371884
ASHG19A3A024969	391.399	376.42	8.52194	8.64879	noncoding	ENST00000456663	RP11-2B19.1	Ensembl	382	chr1	+	81546474	81546856		CCTAGGTAGCCTACCCCCATTAACAGTCTTCCTGCCTAAATGAATTATTATCCAAGAATT	intergenic
ASHG19A3A053839	76.4232	69.3665	6.1762	6.19582	noncoding	BC115389		misc_RNA	2580	chr16	-	67313798	67322958		TGAAACTGCACACAGCAAATCTCCAGTCGGTGGCATGGCCCTGAGAGTCTGGGGACTCAT	natural antisense	NM_001129729	PLEKHG4	puratrophin-1 isoform 1	+	67313488	67323403
ASHG19A3A053839	76.4232	69.3665	6.1762	6.19582	noncoding	BC115389		misc_RNA	2580	chr16	-	67313798	67322958		TGAAACTGCACACAGCAAATCTCCAGTCGGTGGCATGGCCCTGAGAGTCTGGGGACTCAT	natural antisense	NM_001129731	PLEKHG4	puratrophin-1 isoform 2	+	67313491	67323403
ASHG19A3A053839	76.4232	69.3665	6.1762	6.19582	noncoding	BC115389		misc_RNA	2580	chr16	-	67313798	67322958		TGAAACTGCACACAGCAAATCTCCAGTCGGTGGCATGGCCCTGAGAGTCTGGGGACTCAT	natural antisense	NM_015432	PLEKHG4	puratrophin-1 isoform 1	+	67311412	67323403
ASHG19A3A053839	76.4232	69.3665	6.1762	6.19582	noncoding	BC115389		misc_RNA	2580	chr16	-	67313798	67322958		TGAAACTGCACACAGCAAATCTCCAGTCGGTGGCATGGCCCTGAGAGTCTGGGGACTCAT	natural antisense	NM_001129727	PLEKHG4	puratrophin-1 isoform 1	+	67312075	67323403
ASHG19A3A053839	76.4232	69.3665	6.1762	6.19582	noncoding	BC115389		misc_RNA	2580	chr16	-	67313798	67322958		TGAAACTGCACACAGCAAATCTCCAGTCGGTGGCATGGCCCTGAGAGTCTGGGGACTCAT	natural antisense	NM_001129728	PLEKHG4	puratrophin-1 isoform 1	+	67313049	67323403
ASHG19A3A036924	153.489	106.019	7.18077	6.80565	noncoding	NR_003367	PVT1	RefSeq_NR	1918	chr8	+	128806778	129113498		AACTATTAAGGGGAAACAAAAGTGTTCTTAGGAGTCCTGCTGTCACTGTGGATTGAGCCG	intergenic
ASHG19A3A008036	82.4865	71.7107	6.2883	6.24227	noncoding	uc002gus.1	BC029877	UCSC_knowngene	1489	chr17	-	18854937	18857462		TCTAATTTGTATAAGAAGCATAGAGCGTAGGGACAACCGCCTCACCTCTGAAGATACTGC	natural antisense	NM_152351	SLC5A10	sodium/glucose cotransporter 5 isoform 1	+	18855477	18924003
ASHG19A3A008036	82.4865	71.7107	6.2883	6.24227	noncoding	uc002gus.1	BC029877	UCSC_knowngene	1489	chr17	-	18854937	18857462		TCTAATTTGTATAAGAAGCATAGAGCGTAGGGACAACCGCCTCACCTCTGAAGATACTGC	natural antisense	NM_001042450	SLC5A10	sodium/glucose cotransporter 5 isoform 2	+	18855477	18924003
ASHG19A3H0000162	93.5292	101.88	6.47303	6.74531	noncoding	nc-HOXC9-141-	nc-HOXC9-141	HOX cluster	478	chr12	+	54392875	54393353		GACGCCCCACTTAAGTTGTGTAGATCTCTCCTACACTTCTTCAAGCTGGCAAAGAAAGAT	intergenic
ASHG19A3A022958	188.079	214.968	7.47011	7.83299	noncoding	ENST00000465177	MT-ND1	Ensembl	898	chr3	+	106619914	106620812		TAGTGCTTTGCAGATGACACATCTCTATGCCTGTCCTAATATCTAGTACCCCACCTCGAA	intergenic
ASHG19A3A038465	72.9435	88.2576	6.10941	6.53451	noncoding	ENST00000426425	RP11-291J9.2	Ensembl	670	chr9	+	31505943	31506613		CATTTCTTAACACTTTTATCCTTCTAGTTGCTGGAGTAGCTATCACTTGGACCACCCCGC	intergenic
ASHG19A3A047627	2956.36	2136.84	11.4363	11.1525	noncoding	uc001sbk.1	AK096472	UCSC_knowngene	2863	chr12	-	53436972	53448222		TTCTCTGACTTTAGAGTACCTTTTGGGACATAGGGCCTTCCTCTCTACCCTTTCTGTACA	natural antisense	NM_170754	TENC1	tensin-like C1 domain-containing phosphatase	+	53443834	53458162
ASHG19A3A047627	2956.36	2136.84	11.4363	11.1525	noncoding	uc001sbk.1	AK096472	UCSC_knowngene	2863	chr12	-	53436972	53448222		TTCTCTGACTTTAGAGTACCTTTTGGGACATAGGGCCTTCCTCTCTACCCTTTCTGTACA	natural antisense	NM_198316	TENC1	tensin-like C1 domain-containing phosphatase	+	53440809	53458162
ASHG19A3A047627	2956.36	2136.84	11.4363	11.1525	noncoding	uc001sbk.1	AK096472	UCSC_knowngene	2863	chr12	-	53436972	53448222		TTCTCTGACTTTAGAGTACCTTTTGGGACATAGGGCCTTCCTCTCTACCCTTTCTGTACA	natural antisense	NM_015319	TENC1	tensin-like C1 domain-containing phosphatase	+	53442732	53458162
ASHG19A3A011401	451.294	500.536	8.72663	9.06485	noncoding	NR_029390	LOC284412	RefSeq_NR	2450	chr19	-	37756841	37759912		TGGAATTACAGAGAATTCTCACCTCTTTTTTGACTCTCAGGTGGAAACCCCCTTCCCATG	intergenic
ASHG19A3A014505	39432.3	30404	15.2161	14.9522	noncoding	ENST00000431457	AC092662.2	Ensembl	267	chr2	-	156119969	156120236		TTGACTGGTCCCCCTAATAATTGGTGCCCCCGACATAGCATTTCCCCTCATAAATAATAT	intergenic
ASHG19A3A052590	55.9534	73.9969	5.7213	6.28719	noncoding	AF308290		misc_RNA	567	chr15	-	100038018	100038580		CCGGGATATCATGATCAGTGGCTACTGTTTTACTTTTAAAAACCTTCCTTTTCTGGGTCT	intergenic
ASHG19A3A027585	1969.85	1568.69	10.8511	10.6978	noncoding	uc003lsg.2	CR612090	UCSC_knowngene	1256	chr5	-	149822227	149823483		GGTTACATGCCAAACCTTGCTAGGGATTTTAATAACAACATTGAATCTTAACCTGATGAA	intergenic
ASHG19A3L0002441	85.4987	89.6329	6.33677	6.55706	noncoding	chr9:26772419-26808763-	lincRNA-TUSC1	lincRNA	36345	chr9	-	26772419	26808763		AGTGATACCTAAATTTAACTCCAAGGCCTGTAAGACACCCATAAGCCATCCATCCATTCA	intergenic
ASHG19A3A020292	74589.1	90847.4	16.1748	16.449	noncoding	ENST00000437933	FTHL1	Ensembl	532	chr1	+	38010363	38010895		AACACATTACCTGAATGAGCAGGGGAAATCCATCAAGAATTGGGTGACCATGTGACCAAC	intronic antisense	NM_024700	SNIP1	smad nuclear-interacting protein 1	-	38002141	38019903
ASHG19A3A019617	221.246	208.092	7.70675	7.78688	noncoding	ENST00000434510	CTA-796E4.4	Ensembl	357	chr22	-	26557875	26559180		CACTGCCATCCCCACCTATTAAAATAATGGCATGAAAAATAAACAGCCTTTATGTACAAT	intergenic
ASHG19A3A034974	44338.9	51992.4	15.4006	15.6822	noncoding	ENST00000393373	RP11-560I19.2	Ensembl	375	chr7	+	121874584	121874961		ACCTACATACCTGTTACCACTTTCAAAAATCTAAAGACAGTCGATGTGGATGAGAACTAA	intergenic
ASHG19A3A027946	59.3644	69.118	5.80739	6.19119	noncoding	U10512		misc_RNA	202	chr5	+	10082682	10082884		TTGACCATTGTTGGTACTAGAGCTTTGACCCCTGAAAGAATCCATTTGCCTGTGCACCAT	intergenic
ASHG19A3A013758	418.758	320.289	8.61293	8.41191	noncoding	ENST00000454674	AC007389.1	Ensembl	793	chr2	-	65728126	65729272		ATGTTCTTTGGCAATGGCTTCCCTTCTAGTAAAGTCTACGTCTACAGCAATGGCTGCATG	intergenic
ASHG19A3A016655	379.862	208.123	8.4801	7.78706	noncoding	ENST00000424379	RP11-5P18.3	Ensembl	260	chr1	+	16314676	16314936		GGAAAGCCTCATGTTACACTCCTTCTCAAATCTGGCTCTTTATCGATACCATTCCTACAA	intergenic
ASHG19A3A052245	296.719	257.845	8.12838	8.0936	noncoding	ENST00000500751	AC118274.1	Ensembl	1807	chr15	-	63880132	63893008	uc002aml.2,	CAAATTGATTTTGGCAGCATTAAAACAAGATGCCTTTTGTAGAGGCAATGTACTGTAGAA	natural antisense	NM_006537	USP3	ubiquitin carboxyl-terminal hydrolase 3	+	63796809	63883663
ASHG19A3A052245	296.719	257.845	8.12838	8.0936	noncoding	ENST00000500751	AC118274.1	Ensembl	1807	chr15	-	63880132	63893008	uc002aml.2,	CAAATTGATTTTGGCAGCATTAAAACAAGATGCCTTTTGTAGAGGCAATGTACTGTAGAA	intronic antisense	NM_203373	FBXL22	F-box/LRR-repeat protein 22	+	63889551	63894620
ASHG19A3A050271	68.1487	67.7451	6.01134	6.16172	noncoding	ENST00000424532	RP11-430K22.2	Ensembl	479	chr13	+	69228703	69229182		ACCACTGTTGCTGCCACCTTTATGGTATCATAGATTGCATAAACAGAGGTATGTGCAATG	intergenic
ASHG19A3A011811	6463.83	4067.62	12.5777	12.0642	noncoding	ENST00000413308	AC008753.2	Ensembl	775	chr19	-	54275759	54276534		GTTAAAAAGATAAAGGACCGTTTACCTCTTGCTGTGGTGGGTAGTGATATTATCACTGAA	intergenic
ASHG19A3A013849	196.181	206.213	7.53269	7.77389	noncoding	L37703		misc_RNA	210	chr2	-	74225470	74225673		ACAAGTCGGAGCCAGCCAACAACTCCATCTTCGTGCTTCCTACCAGCAAACAGCATGCAT	intergenic
ASHG19A3A023605	859.581	990.673	9.65756	10.0368	noncoding	ENST00000469911	RP11-646E18.1	Ensembl	741	chr3	+	182328461	182329202		ATTTGCTTGGAAGACCTCATTCATGAAATTGCGCTCCCAGGGAAGCATTTCCAGGAGATT	intergenic
ASHG19A3A039951	599.346	284.925	9.13174	8.24022	noncoding	ENST00000433928	RP11-266I3.5	Ensembl	531	chrX	-	55204639	55205170		TGTTTCTTCTATCTTAGGGGCCATTAACTTTATTACCACAATGACTCTTTTTTCACTAGG	intergenic
CUST_65_PI426075208	221.673	286.498	7.70935	8.24971	noncoding	nc-HOXB9-188+	nc-HOXB9-188	HOX cluster	98	chr17	+	46719077	46719175		GGCCAGGCGCGTCTCCGTTCCCCATCTTTACGGGGAGGTTAATGACCTCCTCAGCGCCCC	intergenic
ASHG19A3A020925	132.934	84.0803	6.97248	6.46866	noncoding	AK022066		NRED	2571	chr3	-	41900021	41902592		CTGTCTCAACAGAATTACACCTTACTGTATTTTCAGGATGAATTTATTATTTCTGCCGTC	intron sense-overlapping	NM_017886	ULK4	serine/threonine-protein kinase ULK4	-	41288089	42003660
ASHG19A3A016639	304.079	202.415	8.16205	7.74611	noncoding	ENST00000412645	AC016739.1	Ensembl	883	chr2	+	177106838	177107721		CTGATTTCTACATCTGCAGAGATCCTGAAGAGATGGAAAAAGACCAGGCTGCTGCTGAAA	intergenic
ASHG19A3A031336	3767.36	3940.43	11.8051	12.0166	noncoding	ENST00000432375	HNRPA1P2	Ensembl	960	chr6	+	32292995	32293955		ATACTTTGCCAAACCATGAAACCAAAGTGGCTATTGTGGTTCCAGTAGCAGCAGTAGCTA	intronic antisense	NM_006781	C6orf10	chromosome 6 open reading frame 10	-	32260474	32339656
ASHG19A3A038412	5084.98	5285.05	12.233	12.4513	noncoding	G36637		misc_RNA	407	chr9	+	20515265	20515672		AGAGACTGTGAGATCATTAGTCCCTTTTTCTCCCCATACTCACCGTTTTGTTTTTTGTTT	intronic antisense	NM_004529	MLLT3	protein AF-9	-	20344967	20622514
ASHG19A3A035523	327.169	432.943	8.26838	8.85501	noncoding	AF124368		misc_RNA	1260	chr8	-	11329966	11331213		AGTTGTTGAAAAGAGGTTGAATATTAAGAGCCCAAGTCCCGTTTCCCCAAAAATCCCCCC	intergenic
ASHG19A3A026589	258.012	235.431	7.9283	7.96127	noncoding	ENST00000508480	RP11-432M8.19	Ensembl	404	chr5	-	17670276	17670680		TGTGTGCCATCCATGCCAGGCACGTGACATGACAATTATGCCCAGAGACATGCAGCTGGC	intergenic
ASHG19A3A046258	38821.1	60883.1	15.1957	15.9126	noncoding	ENST00000473603	RP1-89D4.1	Ensembl	402	chr11	+	33258553	33258955	NM_001142285,NM_001142283,NM_001142282,NM_001026,	GACATGGCCTTTGTGAGAAGAAAAAGACCTCAAGAAAGCAACGAAAGGAACGCAAGAACA	intergenic
ASHG19A3A044172	41241.9	48474.9	15.2775	15.5981	noncoding	ENST00000442381	RP11-589B3.1	Ensembl	270	chr10	+	81303842	81304112	ENST00000461060,ENST00000439728,ENST00000428553,ENST00000393374,	CTATGGAAGGAGTCTCAGGCCAAGGATGTCATCGAACAGTACTTCAAATGCAAGAAATGA	intergenic
ASHG19A3A022690	204.429	222.442	7.59216	7.88023	noncoding	uc001cvg.2	BC033363	UCSC_knowngene	1180	chr1	+	53704281	53708454		TACCTTTCTGCCCCACTGATCTCTAGAATAGGTGCTGGGAGACGTTAGAGTATTTGATCT	natural antisense	NM_002370	MAGOH	protein mago nashi homolog	-	53692563	53704282
ASHG19A3A036183	168.383	168.516	7.31027	7.4817	noncoding	ENST00000414169	RP1-223H12.4	Ensembl	786	chr1	+	182410711	182411497		TTGATGATCTGGATCTATGGCTTCTCCTTTTGGTGGTATTGCTACATTTTTGTTAAGGCC	intergenic
ASHG19A3A020045	2470.65	1414	11.1796	10.5508	noncoding	ENST00000344033	FAM32B	Ensembl	428	chr22	+	17694617	17695045		TTCAACAGACACCTGGACACACTCACGGAGCATTACATTCCCAGAGTCAGCTGGACGAAA	intergenic
ASHG19A3A052407	717.665	766.175	9.39795	9.67263	noncoding	ENST00000454246	RP11-216N14.1	Ensembl	752	chr1	-	153689778	153690823		TCTGAGTAATTGGTTTGGAGAAAGAGACTTTACTTTGGATTTGAGAAGATGGCTTTATGT	intergenic
ASHG19A3A007791	1390.27	1846.39	10.3537	10.9425	noncoding	NR_033449	TCF7	RefSeq_NR	3074	chr5	+	133451349	133483919		CTGTGCTTGCAGCCTCCTTGACCAGCACAAGGCCAATCAGCCCCCCCACGGTGTCCCCCA	exon sense-overlapping	NM_201632	TCF7	transcription factor 7 isoform 2	+	133451297	133483920
ASHG19A3A007791	1390.27	1846.39	10.3537	10.9425	noncoding	NR_033449	TCF7	RefSeq_NR	3074	chr5	+	133451349	133483919		CTGTGCTTGCAGCCTCCTTGACCAGCACAAGGCCAATCAGCCCCCCCACGGTGTCCCCCA	exon sense-overlapping	NM_001134851	TCF7	transcription factor 7 isoform 3	+	133451297	133483920
ASHG19A3A007791	1390.27	1846.39	10.3537	10.9425	noncoding	NR_033449	TCF7	RefSeq_NR	3074	chr5	+	133451349	133483919		CTGTGCTTGCAGCCTCCTTGACCAGCACAAGGCCAATCAGCCCCCCCACGGTGTCCCCCA	exon sense-overlapping	NM_003202	TCF7	transcription factor 7 isoform 1	+	133450401	133483920
ASHG19A3A007791	1390.27	1846.39	10.3537	10.9425	noncoding	NR_033449	TCF7	RefSeq_NR	3074	chr5	+	133451349	133483919		CTGTGCTTGCAGCCTCCTTGACCAGCACAAGGCCAATCAGCCCCCCCACGGTGTCCCCCA	exon sense-overlapping	NM_201634	TCF7	transcription factor 7 isoform 4	+	133451297	133483920
ASHG19A3A007791	1390.27	1846.39	10.3537	10.9425	noncoding	NR_033449	TCF7	RefSeq_NR	3074	chr5	+	133451349	133483919		CTGTGCTTGCAGCCTCCTTGACCAGCACAAGGCCAATCAGCCCCCCCACGGTGTCCCCCA	exon sense-overlapping	NM_213648	TCF7	transcription factor 7 isoform 2	+	133451297	133483920
ASHG19A3A028998	2501.72	2296.55	11.1978	11.2562	noncoding	ENST00000512730	CTB-99A3.1	Ensembl	691	chr5	+	145942788	145996567		AAGACATCTCATTGATTGAATGCTCTCCCCTTCATAGCAACTTCTTCTGCGGCTTCCTTG	intronic antisense	NM_181674	PPP2R2B	serine/threonine-protein phosphatase 2A 55 kDa	-	145969067	146435700
ASHG19A3A028998	2501.72	2296.55	11.1978	11.2562	noncoding	ENST00000512730	CTB-99A3.1	Ensembl	691	chr5	+	145942788	145996567		AAGACATCTCATTGATTGAATGCTCTCCCCTTCATAGCAACTTCTTCTGCGGCTTCCTTG	intronic antisense	NM_004576	PPP2R2B	serine/threonine-protein phosphatase 2A 55 kDa	-	145969067	146258159
ASHG19A3A028998	2501.72	2296.55	11.1978	11.2562	noncoding	ENST00000512730	CTB-99A3.1	Ensembl	691	chr5	+	145942788	145996567		AAGACATCTCATTGATTGAATGCTCTCCCCTTCATAGCAACTTCTTCTGCGGCTTCCTTG	intronic antisense	NM_001127381	PPP2R2B	serine/threonine-protein phosphatase 2A 55 kDa	-	145969067	146258457
ASHG19A3A028998	2501.72	2296.55	11.1978	11.2562	noncoding	ENST00000512730	CTB-99A3.1	Ensembl	691	chr5	+	145942788	145996567		AAGACATCTCATTGATTGAATGCTCTCCCCTTCATAGCAACTTCTTCTGCGGCTTCCTTG	intronic antisense	NM_181676	PPP2R2B	serine/threonine-protein phosphatase 2A 55 kDa	-	145969067	146435700
ASHG19A3A028998	2501.72	2296.55	11.1978	11.2562	noncoding	ENST00000512730	CTB-99A3.1	Ensembl	691	chr5	+	145942788	145996567		AAGACATCTCATTGATTGAATGCTCTCCCCTTCATAGCAACTTCTTCTGCGGCTTCCTTG	intronic antisense	NM_181678	PPP2R2B	serine/threonine-protein phosphatase 2A 55 kDa	-	145969067	146461033
ASHG19A3A028998	2501.72	2296.55	11.1978	11.2562	noncoding	ENST00000512730	CTB-99A3.1	Ensembl	691	chr5	+	145942788	145996567		AAGACATCTCATTGATTGAATGCTCTCCCCTTCATAGCAACTTCTTCTGCGGCTTCCTTG	intronic antisense	NM_181677	PPP2R2B	serine/threonine-protein phosphatase 2A 55 kDa	-	145969067	146461033
ASHG19A3A028998	2501.72	2296.55	11.1978	11.2562	noncoding	ENST00000512730	CTB-99A3.1	Ensembl	691	chr5	+	145942788	145996567		AAGACATCTCATTGATTGAATGCTCTCCCCTTCATAGCAACTTCTTCTGCGGCTTCCTTG	intronic antisense	NM_181675	PPP2R2B	serine/threonine-protein phosphatase 2A 55 kDa	-	145969067	146258327
ASHG19A3A044340	130.472	80.1218	6.94749	6.40062	noncoding	AF124819		misc_RNA	753	chr10	+	98280741	98281483		GGGAAGTTGGTCCAACTAAGATGACAGCAGATATATTACATGCAGGATTTAATATTTTCT	natural antisense	NM_020123	TM9SF3	transmembrane 9 superfamily member 3 precursor	-	98277866	98346809
ASHG19A3A010015	848.254	856.615	9.63922	9.83096	noncoding	uc002jvt.1	AK127460	UCSC_knowngene	4597	chr17	+	76492734	76499138		GCTTTTTGTTATAATCTCTGATAGCGTTTTCATAGCCTTCCTCCAGCCTGGCAAATGCCA	natural antisense	NM_173628	DNAH17	"dynein heavy chain 17, axonemal"	-	76419777	76573476
ASHG19A3A028673	691.259	146.136	9.34254	7.27317	noncoding	uc003kry.2	BC045192	UCSC_knowngene	3084	chr5	+	116751207	116915432		CTTCTGCAGATCCCATCTAAAATTACATTTCCAGGCATTCCACATAACCGGAGGAAAAAA	intergenic
ASHG19A3A000024	508.449	584.99	8.89267	9.28469	noncoding	AK311630		NRED	3548	chr16	+	89979825	89987381		TCAAGGAGGTGCTGACATGCTCCTGCTCTCAGGACCGTGCCCTCGTCAGCTGGGATGTGA	exon sense-overlapping	NM_002386	MC1R	melanocyte-stimulating hormone receptor	+	89984286	89987385
ASHG19A3A022418	133695	144274	17.0522	17.106	noncoding	ENST00000446445	AC139452.2	Ensembl	471	chr3	+	32827137	32827608	NM_000984,ENST00000491601,ENST00000475608,ENST00000471227,ENST00000467573,ENST00000456160,ENST00000440453,ENST00000438478,ENST00000431119,BC007583,	TATGTTTGACTGGCTCCTGATTACGATGCTTTGGATGTTGCCAACAAAATTGGGATCATC	intergenic
ASHG19A3A024185	88.2775	113.761	6.38656	6.90855	noncoding	ENST00000491826	RPL21P44	Ensembl	475	chr4	-	54852750	54853225	NR_027153,	TTACAAATATGCGAATCTATAAGAAAGGTGATATGGTACACATCAACGGAATGGATACTG	intergenic
ASHG19A3A055333	74835.6	83711.6	16.1798	16.349	noncoding	uc011mvt.1	AB062081	UCSC_knowngene	407	chrX	+	134540020	134540794		gccgcagggacctctgcctaggaaagccagagacctttgttcacgtgtttacctgctgac	intergenic
ASHG19A3A046191	596.255	641.911	9.12473	9.41799	noncoding	NR_026541	LOC494141	RefSeq_NR	2093	chr11	+	18230684	18233054		CCCCTTGAGTAGGAGTTGGTCATATTCAAGCATCCTGTTCTCTTAAAACTCTCCTTTTAA	intergenic
ASHG19A3A033628	3413.69	1580.79	11.6615	10.7103	noncoding	uc003vwb.1	AK098095	UCSC_knowngene	2750	chr7	-	140419137	140421887		CTGCTCAGGTCCCTTCATTTGTACTTTGGAGTTTTTCTCATGTAAATTTGTATAACAGAA	intergenic
ASHG19A3A045568	122.432	155.521	6.85809	7.36554	noncoding	ENST00000393311	AP001102.1	Ensembl	426	chr11	-	86969890	86970318		TAGATGAGACCTGGTCGGAGAGACTATGGGGCCTGATGGAGATGTTTCCGAAGAGGGTCC	intronic antisense	NM_022918	TMEM135	transmembrane protein 135 isoform 1	+	86748885	87039876
ASHG19A3A045568	122.432	155.521	6.85809	7.36554	noncoding	ENST00000393311	AP001102.1	Ensembl	426	chr11	-	86969890	86970318		TAGATGAGACCTGGTCGGAGAGACTATGGGGCCTGATGGAGATGTTTCCGAAGAGGGTCC	intronic antisense	NM_001168724	TMEM135	transmembrane protein 135 isoform 2	+	86748885	87039876
ASHG19A3A045975	108.411	91.0943	6.68793	6.5787	noncoding	uc001luy.1	AK126380	UCSC_knowngene	4686	chr11	+	1994988	1999674		AGGACGATTCTGTTGAGCCTCCAATTCCCTGGACTGATTATTTGCTTAAGTCAGAACTCC	intergenic
ASHG19A3A042798	256.515	417.115	7.92088	8.79911	noncoding	ENST00000417131	RP11-96B5.2	Ensembl	366	chr10	-	52722752	52723118		AAAGGAGCTGGAAGGTGTTTAACGAATACTGCCAAATTCACTTCAAGCCTCCAAAGAATG	intergenic
ASHG19A3A031052	296.653	87.9366	8.12787	6.52912	noncoding	AL117559		misc_RNA	1654	chr6	+	22221009	22222616		TCAAACGCTAATCCAAGTTCCCTGCAAAACCTGTTCTGTTTTATATAACATTTACTCGTT	intergenic
ASHG19A3L0002914	170.26	145.643	7.32703	7.26912	noncoding	AI859713	lincRNA-NUDT4-2	lincRNA	489	chr12	+	93382371	93382860		CCTGAGATCATATTATTTTCCTTTAAGGATTTGCTTCATCCCAGGTGTTCATCTAATCCT	intergenic
ASHG19A3A012847	711.242	695.886	9.38469	9.53149	noncoding	ENST00000443207	RP4-580N22.2	Ensembl	190	chr1	-	236121178	236135125		CCCAAAAGAAGCTATGCTCGGGCCTTCCCATCGTCCCACTCAAGAGCTTTCTTCATATTG	intergenic
ASHG19A3A013906	940.388	1052.33	9.78854	10.1208	noncoding	ENST00000443301	AC010975.1	Ensembl	669	chr2	-	79720841	79727970		ACAATAGCTTCTCCCGTGAGACAATCTCATCCCTCCACTAGTGTCTTCTCTTGGAATGAT	intergenic
ASHG19A3A017664	74.2225	93.3387	6.13483	6.61693	noncoding	AK001089		misc_RNA	2005	chr20	-	39028226	39030229		CTAGTTGTGGAGAATACGACTGCCTGTTGGTCCACGGCAAATTCTAAATTAAAAAACAAA	intergenic
ASHG19A3A040375	110.85	104.704	6.71776	6.78676	noncoding	ENST00000449485	RP1-30E17.2	Ensembl	481	chrX	-	127457597	127734446		CTTGCTAAAATGTACAAGAAACTTGCACAGCTCTGTCCTTCAGGCTTAAAATCATCCCAG	intergenic
ASHG19A3A023932	2504.46	1594.58	11.1986	10.7241	noncoding	ENST00000514230	RP11-1286E23.3	Ensembl	434	chr4	-	9168022	9171996	uc001lxy.2,NR_024248,NM_019109,NM_001136152,NM_001015050,ENST00000515248,ENST00000503331,ENST00000450217,AK123648,	TTACATGAGCTAGTGAAACATGAAGAAAACGGCCTGGTCTTTGAGGACTCAGAGGAACTG	intergenic
ASHG19A3A026236	251.63	263.52	7.89285	8.12639	noncoding	ENST00000515543	RP11-815N9.3	Ensembl	389	chr4	+	159947290	159947679		ATTCATGGTAGACTGTGTCATGAACAATGTCACCTGTTCTCAGATCTATAAAAAAGTAGA	intronic antisense	NM_152543	C4orf45	hypothetical protein LOC152940	-	159814683	159956333
ASHG19A3A031059	17963.3	17482.1	14.065	14.1696	noncoding	ENST00000403629	RP11-31K13.1	Ensembl	603	chr6	+	24002051	24002654		AACAATCAGCCTTTAAATTTTGGACCCATGAAGGGAGGAAACTTTGGAGGCAGAAACTCT	intergenic
ASHG19A3A017843	985.592	1060.25	9.86065	10.1333	noncoding	uc002xyw.2	PPP4R1L	UCSC_knowngene	2495	chr20	-	56806188	56821308		CCTATCAGTGAGCTGAACAAATACATCATTTAAATCTATGCTGCACTTTGAGTTGCTACA	intergenic
ASHG19A3A027361	59205.2	68857.8	15.8305	16.0853	noncoding	ENST00000414070	RP11-20O24.4	Ensembl	555	chr1	+	109534903	109535458	NM_001035006,NM_000985,ENST00000504072,ENST00000467688,ENST00000452862,ENST00000422360,ENST00000420302,ENST00000401798,ENST00000395729,ENST00000391360,	TTGCCCAGAAGAAAAGGATATCCCAGAAGAAACTGAAGAAACAAAAACTTATGGCACGGG	intronic antisense	NM_001142550	WDR47	WD repeat-containing protein 47 isoform 1	-	109512837	109584850
ASHG19A3A027361	59205.2	68857.8	15.8305	16.0853	noncoding	ENST00000414070	RP11-20O24.4	Ensembl	555	chr1	+	109534903	109535458	NM_001035006,NM_000985,ENST00000504072,ENST00000467688,ENST00000452862,ENST00000422360,ENST00000420302,ENST00000401798,ENST00000395729,ENST00000391360,	TTGCCCAGAAGAAAAGGATATCCCAGAAGAAACTGAAGAAACAAAAACTTATGGCACGGG	intronic antisense	NM_001142551	WDR47	WD repeat-containing protein 47 isoform 3	-	109512837	109584850
ASHG19A3A027361	59205.2	68857.8	15.8305	16.0853	noncoding	ENST00000414070	RP11-20O24.4	Ensembl	555	chr1	+	109534903	109535458	NM_001035006,NM_000985,ENST00000504072,ENST00000467688,ENST00000452862,ENST00000422360,ENST00000420302,ENST00000401798,ENST00000395729,ENST00000391360,	TTGCCCAGAAGAAAAGGATATCCCAGAAGAAACTGAAGAAACAAAAACTTATGGCACGGG	intronic antisense	NM_014969	WDR47	WD repeat-containing protein 47 isoform 2	-	109512837	109584850
ASHG19A3A034426	324.147	249.932	8.2536	8.04937	noncoding	ENST00000419271	RP11-340I6.6	Ensembl	1356	chr7	+	63353663	63355019	NM_002040,	GGAACTTCTCCGAAAATATGTATTGGCAAGTCAAGAACAACAGATGAATGAAATAGTTAC	intergenic
ASHG19A3A037153	88.6726	82.9379	6.39309	6.44808	noncoding	HIT000283323		H-invDB	867	chr9	-	19107866	19108732		GTATAGTGGTCAAGGTTTTTGCTTTCCCTTAGCCTAGTGATGGGCATGTGACTAAAAGCA	intergenic
ASHG19A3A052628	414.108	346.18	8.59744	8.52605	noncoding	HIT000393213		H-invDB	4004	chr15	+	20866279	20870299		CATCCCCACTCCATCCAAGAAAAGACAGATTCTGTCTTAGTAATAATTTCCTTAATCTTA	intergenic
ASHG19A3A030721	88023.8	73402.4	16.4474	16.1756	noncoding	ENST00000492974	RP11-475C16.1	Ensembl	476	chr6	-	153603418	153603894	NM_000990,	AAATTGTGGACTTTGGTCAGTGAACAGACACGGGTGAATGCTGCTAAAAACAAGACTGGG	intergenic
ASHG19A3L0000836	330.515	292.921	8.28147	8.28139	noncoding	Z41842	lincRNA-RASGRF1-2	lincRNA	336	chr15	-	79413452	79413788		AGTAGGGTCCTCCCCAGCCTTAGAGACCTTTCCAGTCAAGACCACCATGTACAGTGATTC	intergenic
ASHG19A3A046057	132.8	155.474	6.97141	7.3649	noncoding	ENST00000450768	AC104389.31	Ensembl	887	chr11	+	5375921	5376808		TTCAACATTCAAAGAGCAACACCCACTGATTTGGGTCCTCTCCACATTGCAAAGATGTCC	intergenic
ASHG19A3A016336	296.835	205.649	8.12894	7.76983	noncoding	ENST00000430381	AC018804.6	Ensembl	618	chr2	+	130959884	130970201		TTGAGTGACAACTTGAGGACAAGGCGGCGCCTCGACAAGATTTCACACAGCAGCTACGGG	intergenic
ASHG19A3A045018	53306.1	64581	15.6843	15.9935	noncoding	ENST00000473882	RPL36AP40	Ensembl	321	chr11	-	25610020	25610341		TACAAGCATTTTAAACTGGGAGGAGATAAGAAGAGAAAGGGACAAGTGATCCAGTTCTAA	intergenic
ASHG19A3A016171	339.579	300.48	8.3178	8.3213	noncoding	ENST00000451204	AC108938.3	Ensembl	136	chr2	+	111257676	111257812	NM_153712,	GATCCAGAAATATCTTGAGCACCCTCTGCTGCTTGAGCCAGGTCATCGCAAGTTTGACAT	intergenic
ASHG19A3A027494	735.213	631.53	9.43135	9.39232	noncoding	ENST00000512753	AC005609.2	Ensembl	3021	chr5	-	140179681	140249953		CAGACCAACCTTTAAATGAACTTTCCACCAAGTAAAGAGCGACACCTTGCGCCTAAAACT	intronic antisense	NM_031500	PCDHA4	protocadherin alpha-4 isoform 2 precursor	+	140186671	140189169
ASHG19A3A027494	735.213	631.53	9.43135	9.39232	noncoding	ENST00000512753	AC005609.2	Ensembl	3021	chr5	-	140179681	140249953		CAGACCAACCTTTAAATGAACTTTCCACCAAGTAAAGAGCGACACCTTGCGCCTAAAACT	intronic antisense	NM_018908	PCDHA5	protocadherin alpha-5 isoform 1 precursor	+	140201360	140391929
ASHG19A3A027494	735.213	631.53	9.43135	9.39232	noncoding	ENST00000512753	AC005609.2	Ensembl	3021	chr5	-	140179681	140249953		CAGACCAACCTTTAAATGAACTTTCCACCAAGTAAAGAGCGACACCTTGCGCCTAAAACT	intronic antisense	NM_018905	PCDHA2	protocadherin alpha-2 isoform 1 precursor	+	140174443	140391929
ASHG19A3A027494	735.213	631.53	9.43135	9.39232	noncoding	ENST00000512753	AC005609.2	Ensembl	3021	chr5	-	140179681	140249953		CAGACCAACCTTTAAATGAACTTTCCACCAAGTAAAGAGCGACACCTTGCGCCTAAAACT	natural antisense	NM_018902	PCDHA11	protocadherin alpha-11 isoform 1 precursor	+	140247830	140391929
ASHG19A3A027494	735.213	631.53	9.43135	9.39232	noncoding	ENST00000512753	AC005609.2	Ensembl	3021	chr5	-	140179681	140249953		CAGACCAACCTTTAAATGAACTTTCCACCAAGTAAAGAGCGACACCTTGCGCCTAAAACT	intronic antisense	NM_031849	PCDHA6	protocadherin alpha-6 isoform 3 precursor	+	140207649	140391929
ASHG19A3A027494	735.213	631.53	9.43135	9.39232	noncoding	ENST00000512753	AC005609.2	Ensembl	3021	chr5	-	140179681	140249953		CAGACCAACCTTTAAATGAACTTTCCACCAAGTAAAGAGCGACACCTTGCGCCTAAAACT	natural antisense	NM_031861	PCDHA11	protocadherin alpha-11 isoform 2 precursor	+	140247830	140251121
ASHG19A3A027494	735.213	631.53	9.43135	9.39232	noncoding	ENST00000512753	AC005609.2	Ensembl	3021	chr5	-	140179681	140249953		CAGACCAACCTTTAAATGAACTTTCCACCAAGTAAAGAGCGACACCTTGCGCCTAAAACT	intronic antisense	NM_018909	PCDHA6	protocadherin alpha-6 isoform 1 precursor	+	140207649	140391929
ASHG19A3A027494	735.213	631.53	9.43135	9.39232	noncoding	ENST00000512753	AC005609.2	Ensembl	3021	chr5	-	140179681	140249953		CAGACCAACCTTTAAATGAACTTTCCACCAAGTAAAGAGCGACACCTTGCGCCTAAAACT	intronic antisense	NM_031856	PCDHA8	protocadherin alpha-8 isoform 2 precursor	+	140220906	140223351
ASHG19A3A027494	735.213	631.53	9.43135	9.39232	noncoding	ENST00000512753	AC005609.2	Ensembl	3021	chr5	-	140179681	140249953		CAGACCAACCTTTAAATGAACTTTCCACCAAGTAAAGAGCGACACCTTGCGCCTAAAACT	intronic antisense	NM_031848	PCDHA6	protocadherin alpha-6 isoform 2 precursor	+	140207649	140210088
ASHG19A3A027494	735.213	631.53	9.43135	9.39232	noncoding	ENST00000512753	AC005609.2	Ensembl	3021	chr5	-	140179681	140249953		CAGACCAACCTTTAAATGAACTTTCCACCAAGTAAAGAGCGACACCTTGCGCCTAAAACT	intronic antisense	NM_031860	PCDHA10	protocadherin alpha-10 isoform 3 precursor	+	140235633	140391929
ASHG19A3A027494	735.213	631.53	9.43135	9.39232	noncoding	ENST00000512753	AC005609.2	Ensembl	3021	chr5	-	140179681	140249953		CAGACCAACCTTTAAATGAACTTTCCACCAAGTAAAGAGCGACACCTTGCGCCTAAAACT	intronic antisense	NM_018907	PCDHA4	protocadherin alpha-4 isoform 1 precursor	+	140186671	140391929
ASHG19A3A027494	735.213	631.53	9.43135	9.39232	noncoding	ENST00000512753	AC005609.2	Ensembl	3021	chr5	-	140179681	140249953		CAGACCAACCTTTAAATGAACTTTCCACCAAGTAAAGAGCGACACCTTGCGCCTAAAACT	intronic antisense	NM_031857	PCDHA9	protocadherin alpha-9 isoform 1 precursor	+	140227356	140391929
ASHG19A3A027494	735.213	631.53	9.43135	9.39232	noncoding	ENST00000512753	AC005609.2	Ensembl	3021	chr5	-	140179681	140249953		CAGACCAACCTTTAAATGAACTTTCCACCAAGTAAAGAGCGACACCTTGCGCCTAAAACT	natural antisense	NM_031497	PCDHA3	protocadherin alpha-3 isoform 2 precursor	+	140180782	140183257
ASHG19A3A027494	735.213	631.53	9.43135	9.39232	noncoding	ENST00000512753	AC005609.2	Ensembl	3021	chr5	-	140179681	140249953		CAGACCAACCTTTAAATGAACTTTCCACCAAGTAAAGAGCGACACCTTGCGCCTAAAACT	intronic antisense	NM_018911	PCDHA8	protocadherin alpha-8 isoform 1 precursor	+	140220906	140391929
ASHG19A3A027494	735.213	631.53	9.43135	9.39232	noncoding	ENST00000512753	AC005609.2	Ensembl	3021	chr5	-	140179681	140249953		CAGACCAACCTTTAAATGAACTTTCCACCAAGTAAAGAGCGACACCTTGCGCCTAAAACT	intronic antisense	NM_014005	PCDHA9	protocadherin alpha-9 isoform 2 precursor	+	140227356	140233744
ASHG19A3A027494	735.213	631.53	9.43135	9.39232	noncoding	ENST00000512753	AC005609.2	Ensembl	3021	chr5	-	140179681	140249953		CAGACCAACCTTTAAATGAACTTTCCACCAAGTAAAGAGCGACACCTTGCGCCTAAAACT	intronic antisense	NM_031411	PCDHA1	protocadherin alpha-1 isoform 3 precursor	+	140165875	140391929
ASHG19A3A027494	735.213	631.53	9.43135	9.39232	noncoding	ENST00000512753	AC005609.2	Ensembl	3021	chr5	-	140179681	140249953		CAGACCAACCTTTAAATGAACTTTCCACCAAGTAAAGAGCGACACCTTGCGCCTAAAACT	intronic antisense	NM_031501	PCDHA5	protocadherin alpha-5 isoform 2 precursor	+	140201360	140203811
ASHG19A3A027494	735.213	631.53	9.43135	9.39232	noncoding	ENST00000512753	AC005609.2	Ensembl	3021	chr5	-	140179681	140249953		CAGACCAACCTTTAAATGAACTTTCCACCAAGTAAAGAGCGACACCTTGCGCCTAAAACT	intronic antisense	NM_018910	PCDHA7	protocadherin alpha-7 isoform 1 precursor	+	140213968	140391929
ASHG19A3A027494	735.213	631.53	9.43135	9.39232	noncoding	ENST00000512753	AC005609.2	Ensembl	3021	chr5	-	140179681	140249953		CAGACCAACCTTTAAATGAACTTTCCACCAAGTAAAGAGCGACACCTTGCGCCTAAAACT	intronic antisense	NM_031852	PCDHA7	protocadherin alpha-7 isoform 2 precursor	+	140213968	140216338
ASHG19A3A027494	735.213	631.53	9.43135	9.39232	noncoding	ENST00000512753	AC005609.2	Ensembl	3021	chr5	-	140179681	140249953		CAGACCAACCTTTAAATGAACTTTCCACCAAGTAAAGAGCGACACCTTGCGCCTAAAACT	intronic antisense	NM_018901	PCDHA10	protocadherin alpha-10 isoform 1 precursor	+	140235633	140391929
ASHG19A3A027494	735.213	631.53	9.43135	9.39232	noncoding	ENST00000512753	AC005609.2	Ensembl	3021	chr5	-	140179681	140249953		CAGACCAACCTTTAAATGAACTTTCCACCAAGTAAAGAGCGACACCTTGCGCCTAAAACT	intronic antisense	NM_031859	PCDHA10	protocadherin alpha-10 isoform 2 precursor	+	140235633	140238168
ASHG19A3A027494	735.213	631.53	9.43135	9.39232	noncoding	ENST00000512753	AC005609.2	Ensembl	3021	chr5	-	140179681	140249953		CAGACCAACCTTTAAATGAACTTTCCACCAAGTAAAGAGCGACACCTTGCGCCTAAAACT	intronic antisense	NM_018900	PCDHA1	protocadherin alpha-1 isoform 1 precursor	+	140165875	140391929
ASHG19A3A027494	735.213	631.53	9.43135	9.39232	noncoding	ENST00000512753	AC005609.2	Ensembl	3021	chr5	-	140179681	140249953		CAGACCAACCTTTAAATGAACTTTCCACCAAGTAAAGAGCGACACCTTGCGCCTAAAACT	natural antisense	NM_018906	PCDHA3	protocadherin alpha-3 isoform 1 precursor	+	140180782	140391929
ASHG19A3H0000189	1445.12	2011.62	10.4089	11.0639	noncoding	nc-HOXD4-25-	nc-HOXD4-25	HOX cluster	228	chr2	+	177001718	177001946		TCCCCTACATTTCCCGGGGAAGTGGGGGGTCGCTGTCTAAGCCCCTTCCCCCAATCACTT	intergenic
ASHG19A3A051342	164.191	171.911	7.27698	7.50906	noncoding	ENST00000493565	RP11-269C4.1	Ensembl	745	chr14	+	30524415	30525160		GAAGCAGAGGCTGTTCTCTCTGAGAGCTTCTACCCTGACCTTGAATCCAGTAAAAAATAA	intergenic
ASHG19A3A008143	437.167	385.543	8.6793	8.68282	noncoding	HIT000325231		H-invDB	540	chr17	-	28951873	28952412	NR_027418,	AGGTTGTGCATGCTGGTTTCTGCTACCTCCTTGGAGTCCTCAAACTTCTCCAGCGCCTGG	intergenic
ASHG19A3A040973	53478	55089	15.6918	15.7725	noncoding	ENST00000418784	CTD-2090I13.4	Ensembl	283	chr1	+	227621764	227622047		ACGATGATGAAGTTCCAGGTATCATGGAGAATTTTGATGAGGCTTCCAAGAATGAGGCAA	intergenic
ASHG19A3A038252	75.1074	105.501	6.15226	6.79784	noncoding	ENST00000434532	RP11-229P13.21	Ensembl	329	chr9	-	139932429	139933342		CTGGAGGTCCAGGCACCTAGACAGCCCTGGCGTGTTCGTGTTATTAATCAGGGATCTCTT	intergenic
ASHG19A3A035662	130.596	200.02	6.94917	7.7292	noncoding	ENST00000506121	C8orf75	Ensembl	1301	chr8	-	29578777	29583939	NR_026765,	TTCAGGATTGCAAGATTTCAGCTACTGTCTCTCCTCGGAGCAGGATTCCATCTTTTCCAT	intergenic
ASHG19A3A015960	147.79	158.873	7.1244	7.39631	noncoding	HIT000257152		H-invDB	322	chr2	+	90153974	90154295		TGTCAGCAGTATAATAACTGGCCTCCCACAGTGATTCAACATGAAACAAAAACCTCAAGA	intergenic
ASHG19A3A025526	9232.32	11189.5	13.1003	13.5292	noncoding	ENST00000510278	RP11-571I18.2	Ensembl	224	chr4	+	54942791	54943015		GATTCCATGAAAGATTTTGAGGAGGTGAAGAGGGCTGGTACCTTTCAGAGTGCAAAGTGA	intergenic
ASHG19A3A021587	551.653	481.816	9.01183	9.00814	noncoding	ENST00000504655	RP11-93K22.8	Ensembl	968	chr3	-	129740395	129741363	NM_001079935,ENST00000512164,ENST00000505943,ENST00000505858,ENST00000454836,ENST00000448529,ENST00000442229,ENST00000422682,ENST00000411729,	AGTATAAAGCCTTCTCCACCTGTGGCTCTCACCTAGCAGTTGTTTGCTGATTTTATGGAA	intergenic
ASHG19A3A052363	113.406	107.574	6.7501	6.82867	noncoding	AL360257		misc_RNA	1863	chr15	-	74027772	74029618		TTTGAGTTTCTTTACCCAGGATGTTCCATCAGATCTCTCTGCTTCCGGGAAGTCCTATTC	intergenic
ASHG19A3A029289	350.35	226.432	8.36112	7.90501	noncoding	ENST00000510294	CTB-14A14.2	Ensembl	1569	chr5	+	180541105	180542674		AAATGCTTCAAGTTACCGTGGTAATTTGGCTGTGCTTTATCATCGCTGGGGACACCTAGA	intergenic
ASHG19A3L0000128	824.386	788.655	9.59921	9.71148	noncoding	chr1:39116163-39128263+	lincRNA-RRAGC-1	lincRNA	12101	chr1	+	39116163	39128263		GGTAAAAAGATGCCTCAAGGAACATCTACCGATCCCCTCTAGAACACTGTTTTGAGAAGG	intergenic
ASHG19A3A040885	3683.13	4182.37	11.773	12.1032	noncoding	ENST00000415648	RP11-377B2.2	Ensembl	586	chrX	+	44508374	44508960		TGTGTTCAAAAACAAGCAGATTTTCACGGAACACATCCACAAGCTGAAGACAGACGAGGC	intergenic
ASHG19A3A018152	4642.73	4988.29	12.1074	12.3648	noncoding	G43548		misc_RNA	128	chr20	+	25038734	25038862		GGAGTCTCCGCGGGCCCCGCCCCTGCTCCGCCCTTCCGCCACCATCCATTCCTCCAGGGC	natural antisense	NM_032501	ACSS1	"acetyl-coenzyme A synthetase 2-like,"	-	24986872	25039616
ASHG19A3A008200	163.78	190.123	7.27367	7.65271	noncoding	ENST00000449789	AC015849.3	Ensembl	1507	chr17	-	34151780	34157147		ATGCTTCTCAAGAAAGAAAAAGTTCTTTGACAGAATCTCTACTCCAGGTCTCTCTCTCTC	intronic antisense	NM_003487	TAF15	TATA-binding protein-associated factor 2N	+	34136487	34174238
ASHG19A3A008200	163.78	190.123	7.27367	7.65271	noncoding	ENST00000449789	AC015849.3	Ensembl	1507	chr17	-	34151780	34157147		ATGCTTCTCAAGAAAGAAAAAGTTCTTTGACAGAATCTCTACTCCAGGTCTCTCTCTCTC	intronic antisense	NM_139215	TAF15	TATA-binding protein-associated factor 2N	+	34136487	34174237
ASHG19A3A034875	109.285	87.7969	6.69895	6.52625	noncoding	uc003vdd.1	BC007100	UCSC_knowngene	695	chr7	+	105208141	105208836		CATGGCACTCTGACTCAAACATTCCCATGTGGTAGGGAATGTAATTAAACATTTTTATTA	intergenic
ASHG19A3A009259	720.674	534.505	9.40368	9.15704	noncoding	ENST00000448505	AC087499.4	Ensembl	168	chr17	+	20498849	20499017		CACCTGATTTGAGTCTACGTTTTCTTCCCTGCTCAGAAGTGACAAGACTGTATGGATCAG	intergenic
ASHG19A3L0000765	4889.63	5217.51	12.1811	12.4302	noncoding	AI734132	lincRNA-RGS6-1	lincRNA	438	chr14	-	73058669	73059107		ATTCATCTTTGTCTTGGACATTTTGGATGACTCTCCCCTCCTGGGACTAGAGACAAACTG	intergenic
ASHG19A3A017387	127.455	82.9312	6.91442	6.4478	noncoding	ENST00000450899	RPLP0P1	Ensembl	390	chr20	-	16567043	16567436		GTCTGCCATGTTGCCACCATGTGCATGCCGACTGGGTATCCACCTGTGATGTCAGTTCCT	intergenic
ASHG19A3A034458	18604	12206.4	14.111	13.6472	noncoding	NR_033416	CCT6P3	RefSeq_NR	2244	chr7	+	64498731	64535091	uc010kzt.1,	ATATAGTTGGTCTATCTCTGCGGTCCTTGAAAGTGAAGTTGGTGTTACTAGGCTGTGGGT	intergenic
ASHG19A3A040306	5176.64	11989.2	12.2607	13.6151	noncoding	ENST00000428194	RP11-232D9.2	Ensembl	957	chrX	-	115803777	115814271	NM_007231,	CTGGATGGGGCATTTTAATTGCAGCTGTGCTGGAGCTAGTTGGAATCATCTGGATTTATG	intergenic
ASHG19A3A052711	2091.78	1282.86	10.9377	10.4122	noncoding	AK095096		misc_RNA	3662	chr15	+	31061534	31065196		TCACCTTAAATGTTTCTGCCTGGCTATTATTAACTGGAGTGCAATATGTTTTTGGTTCTT	intergenic
ASHG19A3A039316	223.036	239.417	7.71691	7.98405	noncoding	ENST00000455981	RP11-344B5.2	Ensembl	583	chr9	+	132044736	132048007		GGAGGAGCATGTGATTCCAGACCCTCCTCTCTGCAACGAAAGTGAGGTTGACACCTGCAG	intergenic
ASHG19A3A038686	985.377	911.657	9.86028	9.91507	noncoding	ENST00000417634	RP11-459O16.3	Ensembl	1111	chr9	+	66358547	66359658		GCAGAAAATACCTCTTTAAACACTATCCCTCCTTTATACATGATTCCACACCCTGGAGGG	intergenic
CUST_465_PI426073487	104.819	110.615	6.63919	6.86686	noncoding	uc.467+	uc.467	UCR	731	chrX	+	25008353	25009084		TTGCTCTCATTCAGCCACTTCACAAAAAATTATTTTATTCCATCTCTCAGTGATGATGAC	intron sense-overlapping	NM_016937	POLA1	DNA polymerase alpha catalytic subunit	+	24712063	25015102
ASHG19A3A034087	1541.51	1925.28	10.5019	11.0056	noncoding	ENST00000434063	HOTAIRM1	Ensembl	659	chr7	+	27135724	27139773	nc-HOXA1-59+,	TGCCTCTATTACCAATTTAAATCTATGGCTTGAACCTGTGCACTGAAAATCAAATCCTTT	bidirectional	NM_005522	HOXA1	homeobox protein Hox-A1 isoform a	-	27132613	27135625
ASHG19A3A034087	1541.51	1925.28	10.5019	11.0056	noncoding	ENST00000434063	HOTAIRM1	Ensembl	659	chr7	+	27135724	27139773	nc-HOXA1-59+,	TGCCTCTATTACCAATTTAAATCTATGGCTTGAACCTGTGCACTGAAAATCAAATCCTTT	bidirectional	NM_153620	HOXA1	homeobox protein Hox-A1 isoform b	-	27132613	27135625
ASHG19A3A048586	128604	143644	17.0014	17.1	noncoding	ENST00000468715	RP11-122C9.1	Ensembl	747	chr1	-	97144429	97145176	NM_000971,ENST00000493874,ENST00000457119,ENST00000452484,ENST00000449390,ENST00000449200,ENST00000398410,	GCGAATTGCTTTGACAGATAACGCTTTGATTGCTCGATCTCTTGGTAAATACGGCATCAT	intergenic
ASHG19A3A012638	246.637	219.358	7.86089	7.86236	noncoding	ENST00000317122	RP11-169K16.9	Ensembl	2468	chr1	-	16160973	16174642	NR_024279,	GGGCGTCTTTCACTAATTTTTCCTAGGTTTTCTCTTCTATCGGGCTCTGTGGTCCTTTCA	natural antisense	NM_015001	SPEN	msx2-interacting protein	+	16174358	16266950
ASHG19A3A018905	73.8281	108.579	6.12596	6.84223	noncoding	ENST00000411427	AP001610.5	Ensembl	555	chr21	-	42813320	42814669		CACGTTTTGTTTATCCCTTGAGTTATGGACATCCCATCTCAAATGCATTCTTAATGAGTA	natural antisense	NM_001178046	MX1	interferon-induced GTP-binding protein Mx1	+	42798102	42831141
ASHG19A3A018905	73.8281	108.579	6.12596	6.84223	noncoding	ENST00000411427	AP001610.5	Ensembl	555	chr21	-	42813320	42814669		CACGTTTTGTTTATCCCTTGAGTTATGGACATCCCATCTCAAATGCATTCTTAATGAGTA	natural antisense	NM_002462	MX1	interferon-induced GTP-binding protein Mx1	+	42797977	42831141
ASHG19A3A018905	73.8281	108.579	6.12596	6.84223	noncoding	ENST00000411427	AP001610.5	Ensembl	555	chr21	-	42813320	42814669		CACGTTTTGTTTATCCCTTGAGTTATGGACATCCCATCTCAAATGCATTCTTAATGAGTA	natural antisense	NM_001144925	MX1	interferon-induced GTP-binding protein Mx1	+	42792519	42831141
ASHG19A3L0001135	272.186	208.499	8.00622	7.78915	noncoding	chr2:19979944-19990294-	lincRNA-OSR1-1	lincRNA	10351	chr2	-	19979944	19990294		TCTTGTGTTTGTGATCAGCACTTCCAATCCTCTTTGCCCTGAGTAGTATTTGATTGTAGA	intergenic
ASHG19A3A041679	599.741	625.144	9.13234	9.37782	noncoding	U66048		NRED	2959	chrX	+	149128983	149131935		AAGAAGTGTACTCACACTGCCCCAACACCAGTGAGTGGAAATATTTATAGGTCTCTCATT	intergenic
ASHG19A3A039969	173.429	197.996	7.35422	7.71318	noncoding	ENST00000506499	AL031115.1	Ensembl	3639	chrX	-	57620185	57623908		TGAGAGAATTTGCTGCTTCTAGCTGAGCTAAGAGATCCTGGCCCACCTTATGCCTTTTAA	natural antisense	NM_007157	ZXDB	zinc finger X-linked protein ZXDB	+	57618268	57623910
ASHG19A3A019227	436.617	569.727	8.67775	9.24726	noncoding	ENST00000430068	AP000704.5	Ensembl	438	chr21	+	38338811	38344128		TTTCAGATAGCCTTCTTGAAGTTTGCTGAATTATGGCTATAAGGACCACTCCCCACCCCT	intronic antisense	NM_000411	HLCS	biotin--protein ligase	-	38123188	38362536
ASHG19A3A043527	132.008	141.039	6.96342	7.2207	noncoding	ENST00000445932	RP11-298E9.5	Ensembl	597	chr10	+	3266007	3269599		AATGTGTTTCCCAAGAAGCAAGTCTGGATTCATCTTATGTACACTCCTGGCCTGTCTCTG	intergenic
ASHG19A3A024753	1065.48	1237.83	9.97443	10.3618	noncoding	ENST00000514575	RP11-327I3.1	Ensembl	187	chr4	-	138222154	138222341		TGAGCTCATGCAACAAAAGCAGAAGGCAGCTAATGAGAAGTCTATGCAGACAAAAGAAAA	intergenic
ASHG19A3A012678	273.686	219.822	8.01404	7.86523	noncoding	ENST00000463711	AC006133.3	Ensembl	170	chr19	+	40188543	40188713		GATGTGTGCCGCTTGTGTTTCCATAAGTACTTAAAGGATATATTTTTCATTAAGTTGGAC	intergenic
ASHG19A3A039845	90.8937	99.4266	6.43074	6.70957	noncoding	ENST00000451396	RP11-478J18.2	Ensembl	476	chr1	+	214139236	214159496		ATGTAGGAAGCTTTGGATGATGTCTGCGTATCCTCAGAACAGTCTCCTAACCATTCCTCT	intergenic
ASHG19A3A020798	1875.46	2076.41	10.7887	11.1104	noncoding	NR_027694	C3orf48	RefSeq_NR	1617	chr3	-	20021453	20053765		GCTCCCCTTCCCAGGAGATGCCAAAAATAATTTCTGGAATATTACATGTTGCAAACACTG	natural antisense	NM_004162	RAB5A	ras-related protein Rab-5A	+	19988571	20026667
ASHG19A3A034369	4318.1	5749.42	12.0032	12.5716	noncoding	ENST00000450065	RP4-725G10.4	Ensembl	779	chr7	+	56243326	56244105		CTAAAACTGCGGCTAAAACCATCCGTCAATTACTACCAAGTTGCAGATTTTAAAGATGCC	intergenic
ASHG19A3A038730	1826.48	1972.5	10.7472	11.0388	noncoding	ENST00000434542	RP11-460N11.5	Ensembl	514	chr9	+	69732349	69732863	ENST00000478218,ENST00000475865,ENST00000444223,ENST00000428542,	TTGCCTTATCCTGGTCCTGGTTCTGCCCTGACCCTGGCCTTGCTCTGGATCCTCTCTGGT	intergenic
ASHG19A3A016255	27064	26690.3	14.657	14.7643	noncoding	ENST00000435623	AC012365.1	Ensembl	950	chr2	+	117781493	117782443		GAAAAAACTTCCTACCACTTACACTAGCATTCTACATATATCTCAATGCCTGTCCTAATT	intergenic
ASHG19A3A020412	62.3902	68.4562	5.88312	6.17713	noncoding	ENST00000428151	RP5-884C9.2	Ensembl	573	chr1	+	38513096	38584697		CAGCCAGCCTTAAGGAGTGGACATCCTGCCTGGTGAAACTGAACAAGACACCTACCGCAT	bidirectional	NM_002699	POU3F1	"POU domain, class 3, transcription factor 1"	-	38509522	38512450
ASHG19A3A024604	72.8294	155.012	6.10673	7.36064	noncoding	uc003hzj.3	BC009800	UCSC_knowngene	953	chr4	-	110351122	110354973		TATGGCATTCCAGTTGAGTTTCACCACGCATTATCATGAGAATAAATAATTTCACTGACT	natural antisense	NM_006323	SEC24B	protein transport protein Sec24B isoform a	+	110354970	110461615
ASHG19A3A024604	72.8294	155.012	6.10673	7.36064	noncoding	uc003hzj.3	BC009800	UCSC_knowngene	953	chr4	-	110351122	110354973		TATGGCATTCCAGTTGAGTTTCACCACGCATTATCATGAGAATAAATAATTTCACTGACT	natural antisense	NM_001042734	SEC24B	protein transport protein Sec24B isoform b	+	110354970	110461615
ASHG19A3A035017	101.759	99.8886	6.59802	6.7169	noncoding	AF086129		RNAdb	488	chr7	+	127224922	127225407		AAACTTCTCCATGGAGGGTCTGAACGGATTGCCCCACGTCAGCTTTCCAGCAGAACGGGA	natural antisense	NM_024523	GCC1	GRIP and coiled-coil domain-containing protein	-	127220681	127225654
ASHG19A3A019861	9007.52	9047.1	13.0645	13.213	noncoding	ENST00000448085	HMGN2L10	Ensembl	265	chr22	-	42105228	42105493		ATAAAGCCAAGGTGAAGGACGAACCACAGAGAAGATCCACAAGGTTGTCTGCAAAATCTG	intronic antisense	NM_152513	MEI1	meiosis inhibitor protein 1	+	42095517	42195459
ASHG19A3A024054	4101.42	4449.34	11.9236	12.2008	noncoding	ENST00000504377	RP11-495L18.2	Ensembl	370	chr4	-	30721037	30723038		TCTGGGGGACTTGTTTTCCCTCCCTCGGGCTGGTAAATTTCCTCCTCCCTTGACTAATGC	natural antisense	NM_032456	PCDH7	protocadherin-7 isoform b precursor	+	30722029	30726957
ASHG19A3A024054	4101.42	4449.34	11.9236	12.2008	noncoding	ENST00000504377	RP11-495L18.2	Ensembl	370	chr4	-	30721037	30723038		TCTGGGGGACTTGTTTTCCCTCCCTCGGGCTGGTAAATTTCCTCCTCCCTTGACTAATGC	natural antisense	NM_002589	PCDH7	protocadherin-7 isoform a precursor	+	30722036	30732838
ASHG19A3A024054	4101.42	4449.34	11.9236	12.2008	noncoding	ENST00000504377	RP11-495L18.2	Ensembl	370	chr4	-	30721037	30723038		TCTGGGGGACTTGTTTTCCCTCCCTCGGGCTGGTAAATTTCCTCCTCCCTTGACTAATGC	natural antisense	NM_001173523	PCDH7	protocadherin-7 isoform d precursor	+	30722036	31148423
ASHG19A3A024054	4101.42	4449.34	11.9236	12.2008	noncoding	ENST00000504377	RP11-495L18.2	Ensembl	370	chr4	-	30721037	30723038		TCTGGGGGACTTGTTTTCCCTCCCTCGGGCTGGTAAATTTCCTCCTCCCTTGACTAATGC	natural antisense	NM_032457	PCDH7	protocadherin-7 isoform c precursor	+	30722036	31148423
CUST_529_PI426073487	2951.18	1389.58	11.4347	10.5259	noncoding	uc.50-	uc.50	UCR	222	chr2	-	38976300	38976522		ATCCCCTCGAGTCATCTACACCTAGCTTCACCTTATTCTTTAAAGGGCAGAAAATTTGAG	intron sense-overlapping	NM_001195446	SRSF7	serine/arginine-rich splicing factor 7 isoform	-	38970740	38978636
CUST_529_PI426073487	2951.18	1389.58	11.4347	10.5259	noncoding	uc.50-	uc.50	UCR	222	chr2	-	38976300	38976522		ATCCCCTCGAGTCATCTACACCTAGCTTCACCTTATTCTTTAAAGGGCAGAAAATTTGAG	intron sense-overlapping	NM_001031684	SRSF7	serine/arginine-rich splicing factor 7 isoform	-	38970740	38978636
ASHG19A3A018450	274.536	246.897	8.01828	8.03185	noncoding	ENST00000424566	RP5-955M13.4	Ensembl	802	chr20	+	49615906	49626556		ACCCCCACCTGTACTTCTTTGGAGACCGGCTGATTAGAGCTGTCTTGCCAGGACACACCA	natural antisense	NM_002237	KCNG1	potassium voltage-gated channel subfamily G	-	49620192	49639675
ASHG19A3A036712	72438.6	92949.3	16.131	16.4815	noncoding	ENST00000446498	RP3-476K8.4	Ensembl	535	chr1	-	26781143	26781678	NM_001035006,NM_000985,ENST00000504072,ENST00000467688,ENST00000452862,ENST00000447415,ENST00000444020,ENST00000422360,ENST00000420302,ENST00000414070,ENST00000401798,ENST00000395729,ENST00000391360,	TTCCTAAACCAGAAGAGGAGGTTGCCCAGAAGAAAATGATATCCCAAAGAAACTGAAGAA	intronic antisense	NM_205861	DHDDS	dehydrodolichyl diphosphate synthase isoform b	+	26758801	26797795
ASHG19A3A036712	72438.6	92949.3	16.131	16.4815	noncoding	ENST00000446498	RP3-476K8.4	Ensembl	535	chr1	-	26781143	26781678	NM_001035006,NM_000985,ENST00000504072,ENST00000467688,ENST00000452862,ENST00000447415,ENST00000444020,ENST00000422360,ENST00000420302,ENST00000414070,ENST00000401798,ENST00000395729,ENST00000391360,	TTCCTAAACCAGAAGAGGAGGTTGCCCAGAAGAAAATGATATCCCAAAGAAACTGAAGAA	intronic antisense	NM_024887	DHDDS	dehydrodolichyl diphosphate synthase isoform a	+	26758801	26797795
ASHG19A3A027814	2322.96	1380.09	11.0917	10.5167	noncoding	uc003mmj.1	AK026101	UCSC_knowngene	1637	chr5	-	180256958	180258595		CACCCGAGTAAATGAGAATGATGACTGACTGAGACCCTGATGGTGGTGGCTTAGGCAAGA	intergenic
ASHG19A3A049738	679.811	670.783	9.31639	9.47832	noncoding	ENST00000299197	RP11-477B16.3	Ensembl	1822	chr13	-	95409704	95411526		GGCTCACACACTGAAAGTAGTAAACTTTGGCGCTCCAGTTGAAGTTTTTGACTCTGAAGA	intergenic
ASHG19A3A053841	52987.6	42579.4	15.6738	15.4184	noncoding	ENST00000439139	RP11-404O13.4	Ensembl	499	chr1	-	158165422	158165921		ATCTCTACTGCTACCTTACCAATGAGGGCATCCAGTATCTCCGTGATTACCTTCATATGC	intergenic
ASHG19A3A024204	256.692	234.007	7.9215	7.95348	noncoding	CR604878		NRED	1220	chr4	-	56814122	56815341		ATATTAATCCAGGGCTGACACCACTTGAAGATAAGCCCGTTCCTCTCTCTGGTATATTCT	natural antisense	NM_025009	CEP135	centrosomal protein of 135 kDa	+	56815036	56899527
ASHG19A3A007439	101.369	91.9153	6.59242	6.59331	noncoding	NR_026920	C22orf27	RefSeq_NR	2134	chr22	+	31318294	31322638		GTCGTGGCTGCGTCCTCTAGGCCAGCCTTGTGCAAAGGACCTTCTCACCACAGATCAGCC	natural antisense	NM_014941	MORC2	MORC family CW-type zinc finger protein 2	-	31322599	31364187
ASHG19A3A020640	24425.9	22889.8	14.5044	14.5463	noncoding	ENST00000333351	AC090043.1	Ensembl	468	chr3	-	1637457	1637929		CAAGGGAAGGCTTTAAATGCCAAGAAAGCGGTGTTGAAAGGTGTCCACAGCCACAAAAAA	intergenic
ASHG19A3A023943	120.405	73.6388	6.83275	6.27955	noncoding	ENST00000511169	AC006499.7	Ensembl	607	chr4	-	10168782	10169389		TATACAATCGTGGTGACAACTTTCACCTCAGACTTTGCTGGCCTTGTGGGGATAGAATCA	intergenic
ASHG19A3A007579	359.414	291.416	8.39998	8.27243	noncoding	NR_027774	PLEKHM1	RefSeq_NR	5065	chr17	-	43513266	43568146	NR_024386,	ACTGGACCCCCAGGCTGCCATCCCGACACATCATCTCAGAGTTGGAGCACCTGACGTTTG	exon sense-overlapping	NM_014798	PLEKHM1	pleckstrin homology domain-containing family M	-	43513265	43568146
ASHG19A3A013994	31079.7	35847.8	14.8717	15.1755	noncoding	HIT000327629_02		H-invDB	384	chr2	-	89567725	89568232		TTACTGTCAACAGTATGATAATCTCCCTCCCACAGTGTAACAAGTCATAACATAAATCAC	intergenic
ASHG19A3A032832	11615.3	11606	13.4312	13.5705	noncoding	NR_027342	FKBP9L	RefSeq_NR	2471	chr7	-	55748767	55756994		GGGAGTTGGCTCCCTCCCCAAAGCCATCCCTGAGTTGGCTTTGTTTTGGGTTCCTCCCAG	intergenic
ASHG19A3A033726	78.5686	85.1682	6.21696	6.48529	noncoding	AK125321		misc_RNA	3862	chr7	-	149555719	149559581		CAGGGGTATGCAGATAAACCATTTCCTCTATTGAAAATAAAATCCATCACTATCTACATC	natural antisense	NM_001099220	ZNF862	zinc finger protein 862	+	149535508	149564568
CUST_2_PI426265844	111.342	108.237	6.72469	6.83751	noncoding	AK023948	AK023948	lncRNAdb	2807	chr8	+	134067203	134070012		CAAGTCCTGCTTCCTTTTGTAGGTTTAAGACATTAGTTCCTGAGAAATTGACTAATCAAG	intronic antisense	NM_001045556	SLA	src-like-adapter isoform a	-	134048972	134115310
CUST_2_PI426265844	111.342	108.237	6.72469	6.83751	noncoding	AK023948	AK023948	lncRNAdb	2807	chr8	+	134067203	134070012		CAAGTCCTGCTTCCTTTTGTAGGTTTAAGACATTAGTTCCTGAGAAATTGACTAATCAAG	intron sense-overlapping	NM_003235	TG	thyroglobulin precursor	+	133879204	134147143
CUST_2_PI426265844	111.342	108.237	6.72469	6.83751	noncoding	AK023948	AK023948	lncRNAdb	2807	chr8	+	134067203	134070012		CAAGTCCTGCTTCCTTTTGTAGGTTTAAGACATTAGTTCCTGAGAAATTGACTAATCAAG	intronic antisense	NM_001045557	SLA	src-like-adapter isoform b	-	134048972	134115310
CUST_2_PI426265844	111.342	108.237	6.72469	6.83751	noncoding	AK023948	AK023948	lncRNAdb	2807	chr8	+	134067203	134070012		CAAGTCCTGCTTCCTTTTGTAGGTTTAAGACATTAGTTCCTGAGAAATTGACTAATCAAG	intronic antisense	NM_006748	SLA	src-like-adapter isoform c	-	134048972	134072603
ASHG19A3A027241	472.443	595.803	8.78972	9.31065	noncoding	uc003kqr.1	AK097686	UCSC_knowngene	1355	chr5	-	113807941	114109110	ENST00000498912,	TTGAAAAAGAGACTCTGTGTGGTACTCTAAGAATTACAGTCCTCCCGCTCCGTGATCAAG	natural antisense	NM_021614	KCNN2	small conductance calcium-activated potassium	+	113698015	113832197
ASHG19A3A027241	472.443	595.803	8.78972	9.31065	noncoding	uc003kqr.1	AK097686	UCSC_knowngene	1355	chr5	-	113807941	114109110	ENST00000498912,	TTGAAAAAGAGACTCTGTGTGGTACTCTAAGAATTACAGTCCTCCCGCTCCGTGATCAAG	natural antisense	NM_170775	KCNN2	small conductance calcium-activated potassium	+	113769226	113832197
ASHG19A3A038206	1633.07	1469.12	10.5859	10.6092	noncoding	HIT000086764		H-invDB	724	chr9	-	138999587	139000884		TTTCAAATTGTGCTGTGATAACCCTGGCTGTCTTCCTGCTCCCATAGTGGATAAAAGCGT	intergenic
ASHG19A3A051793	249.329	237.114	7.87892	7.97017	noncoding	uc010awi.1	BC148240	UCSC_knowngene	557	chr14	+	101540363	101540920		TAAGATCCAGCCTTTGTCATTTACTGGTACTGTGGTTTTCTTGTATCTGGCCTCCACCTC	intergenic
ASHG19A3A023592	158.392	178.068	7.22764	7.5626	noncoding	ENST00000420887	RP11-259P15.3	Ensembl	1069	chr3	+	180538331	180539400		TCATGAAGTGTGACATGGACATTTGCAAAGACCTCTACACCAATGCAGTACTGTCCAGTG	intergenic
ASHG19A3A050401	14363	18067.2	13.7384	14.219	noncoding	ENST00000456305	RP4-655N15.3	Ensembl	504	chr1	-	117317741	117318245		ACATTACCTCAATGAACCAGTGAAATCCATCAAAGAATTGGGTGTCCACGTGACCAACTT	intergenic
ASHG19A3A014121	117.763	121.355	6.8025	7.00549	noncoding	ENST00000431897	AC108051.1	Ensembl	437	chr2	-	103583865	103600887		GCAGCATTTGTGAAAATACCTCCCGATCATCTTTCACAGGAATTCTTTCCAAGTGAGAAA	intergenic
ASHG19A3L0002274	302.317	336.447	8.15468	8.48325	noncoding	AW391396	lincRNA-ATP11C-2	lincRNA	766	chrX	-	138516716	139115600		TGCTGTAGTCCACTATAATTTCCAAAATCATTATAGTTCCCACCACCACCATAGTTACCA	intron sense-overlapping	NM_001013403	CXorf66	hypothetical protein LOC347487 precursor	-	139037883	139047677
ASHG19A3L0002274	302.317	336.447	8.15468	8.48325	noncoding	AW391396	lincRNA-ATP11C-2	lincRNA	766	chrX	-	138516716	139115600		TGCTGTAGTCCACTATAATTTCCAAAATCATTATAGTTCCCACCACCACCATAGTTACCA	intron sense-overlapping	NM_001171876	MCF2	proto-oncogene DBL isoform c	-	138663929	138790381
ASHG19A3L0002274	302.317	336.447	8.15468	8.48325	noncoding	AW391396	lincRNA-ATP11C-2	lincRNA	766	chrX	-	138516716	139115600		TGCTGTAGTCCACTATAATTTCCAAAATCATTATAGTTCCCACCACCACCATAGTTACCA	intron sense-overlapping	NM_001099855	MCF2	proto-oncogene DBL isoform a	-	138663929	138790381
ASHG19A3L0002274	302.317	336.447	8.15468	8.48325	noncoding	AW391396	lincRNA-ATP11C-2	lincRNA	766	chrX	-	138516716	139115600		TGCTGTAGTCCACTATAATTTCCAAAATCATTATAGTTCCCACCACCACCATAGTTACCA	intron sense-overlapping	NM_005369	MCF2	proto-oncogene DBL isoform b	-	138663929	138725000
ASHG19A3L0002274	302.317	336.447	8.15468	8.48325	noncoding	AW391396	lincRNA-ATP11C-2	lincRNA	766	chrX	-	138516716	139115600		TGCTGTAGTCCACTATAATTTCCAAAATCATTATAGTTCCCACCACCACCATAGTTACCA	intron sense-overlapping	NM_001171877	MCF2	proto-oncogene DBL isoform d	-	138663929	138725000
ASHG19A3L0002274	302.317	336.447	8.15468	8.48325	noncoding	AW391396	lincRNA-ATP11C-2	lincRNA	766	chrX	-	138516716	139115600		TGCTGTAGTCCACTATAATTTCCAAAATCATTATAGTTCCCACCACCACCATAGTTACCA	intron sense-overlapping	NM_001010986	ATP11C	probable phospholipid-transporting ATPase IG	-	138808504	138914447
ASHG19A3L0002274	302.317	336.447	8.15468	8.48325	noncoding	AW391396	lincRNA-ATP11C-2	lincRNA	766	chrX	-	138516716	139115600		TGCTGTAGTCCACTATAATTTCCAAAATCATTATAGTTCCCACCACCACCATAGTTACCA	intron sense-overlapping	NM_173694	ATP11C	probable phospholipid-transporting ATPase IG	-	138808504	138914447
ASHG19A3L0002274	302.317	336.447	8.15468	8.48325	noncoding	AW391396	lincRNA-ATP11C-2	lincRNA	766	chrX	-	138516716	139115600		TGCTGTAGTCCACTATAATTTCCAAAATCATTATAGTTCCCACCACCACCATAGTTACCA	intronic antisense	NM_000133	F9	coagulation factor IX preproprotein	+	138612894	138645617
ASHG19A3L0002274	302.317	336.447	8.15468	8.48325	noncoding	AW391396	lincRNA-ATP11C-2	lincRNA	766	chrX	-	138516716	139115600		TGCTGTAGTCCACTATAATTTCCAAAATCATTATAGTTCCCACCACCACCATAGTTACCA	intron sense-overlapping	NM_001171878	MCF2	proto-oncogene DBL isoform e	-	138663929	138725000
ASHG19A3L0002274	302.317	336.447	8.15468	8.48325	noncoding	AW391396	lincRNA-ATP11C-2	lincRNA	766	chrX	-	138516716	139115600		TGCTGTAGTCCACTATAATTTCCAAAATCATTATAGTTCCCACCACCACCATAGTTACCA	intron sense-overlapping	NM_001171879	MCF2	proto-oncogene DBL isoform f	-	138663929	138725000
ASHG19A3A041482	81728.4	97224.1	16.325	16.548	noncoding	ENST00000316450	RP11-349N19.2	Ensembl	402	chrX	+	122648323	122648728	uc003nhn.2,NR_003933,NR_002315,NM_002107,ENST00000512313,ENST00000509149,ENST00000505098,ENST00000475267,ENST00000440551,ENST00000421430,ENST00000416765,ENST00000404612,ENST00000369387,ENST00000321285,	AACCTGTGTGCTATCCATGCCAAACGTGTAACAATTACGCCAAAAGACATCCAGCTAGCA	intergenic
ASHG19A3A000431	30238.1	31687.4	14.8276	15.0017	noncoding	ENST00000501841	AC013489.2	Ensembl	2531	chr15	-	89045154	89052959		ggccaaggtgggaggattgcttgaacccaggctggagtgtggtggcatgatcatggctca	intergenic
ASHG19A3A010111	136.479	103.377	7.00998	6.76904	noncoding	AK025194		NRED	1957	chr18	-	2517269	2519259		TAAAACTTTAAGCCAGTGTTCTCTTCAGAGCCCAGACAGTCCTCTGCAGTTTGGAGAGTT	intergenic
ASHG19A3A014076	2671.13	2955.86	11.2967	11.6074	noncoding	uc002sxv.3	BC032409	UCSC_knowngene	2813	chr2	-	98081832	98091049	uc010yvb.1,ENST00000492960,ENST00000448494,CR603951,AK057592,	TCAGGAGAAGAAAAGGAGATCCAGACTCATGACAGAGAGATGACCTTTGCCAAGAGTACA	intergenic
ASHG19A3A045150	619.333	644.776	9.17627	9.4249	noncoding	uc001nhl.1	AB231737	UCSC_knowngene	1004	chr11	-	55061178	55065708		TTCTACCAGAACGAAGGTCCCTCCTACTTTATCCACCAGCAACAAAACTTTGTGGAATGA	intergenic
ASHG19A3A051963	355.787	275.989	8.38467	8.19467	noncoding	AK098530		misc_RNA	1574	chr15	-	33527753	33534491		AGACACCACCCAAAGAAACATGGCCAGTTTTTCCTATTCCAAACCTGGGTTTTCCTCTAT	intergenic
ASHG19A3L0002632	103.552	106.916	6.62184	6.81873	noncoding	chr11:79223852-79229652+	lincRNA-FAM181B	lincRNA	5801	chr11	+	79223852	79229652		TAGGTGTTTGTGACTCAGGGAGTGGGTATAAGGTGTCCCTTTCTGGGATGTTTTCTTTTC	intergenic
ASHG19A3L0000291	1428.99	1552.14	10.392	10.6803	noncoding	AK296262	lincRNA-PTEN-1	lincRNA	1121	chr10	-	89892056	90343015		AGTCTTCATATTTTGAGCCTGTCGTTCCTCTCATATGTCCCACTCCCTTTTCATACTGTA	exon sense-overlapping	NM_001031709	RNLS	renalase isoform 1	-	90043858	90343082
ASHG19A3L0000291	1428.99	1552.14	10.392	10.6803	noncoding	AK296262	lincRNA-PTEN-1	lincRNA	1121	chr10	-	89892056	90343015		AGTCTTCATATTTTGAGCCTGTCGTTCCTCTCATATGTCCCACTCCCTTTTCATACTGTA	exon sense-overlapping	NM_018363	RNLS	renalase isoform 2	-	90033620	90343082
ASHG19A3A049558	663.039	647.909	9.28038	9.4306	noncoding	ENST00000447552	RP11-203I16.3	Ensembl	1592	chr13	-	49784557	49786430		TGGAGCCCTCACACCCCACAAGAACATGAAATTGTTTGATTGGATCAACCTTACTTATCT	intergenic
ASHG19A3A019315	74.5358	76.9419	6.14138	6.346	noncoding	AK057962		misc_RNA	1981	chr21	+	44851116	44853097		ACATTTGGCACTCGATGAGCCATTTCTCCACATTTCAGGAGCCTTGTTTTAAGACAGCCT	intergenic
ASHG19A3A050452	32727.3	28273.4	14.9414	14.8434	noncoding	ENST00000455851	RP11-217F17.1	Ensembl	743	chr13	+	105466677	105467420		TAAAGGAATTTTGCAGAGCTGAAGATAAGTGCCTGAGAAAGAAGTTTGCCCATAAGATGC	intergenic
ASHG19A3A024017	2573.06	2440.71	11.2396	11.3396	noncoding	ENST00000421246	RP11-800K23.2	Ensembl	576	chr4	-	22728997	22729573	NM_001791,NM_001039802,ENST00000456658,	CCTAAAGAATGTATTTGACGAAGCAATATTGGCTGCCCTGGAGCCTCCAGAACCGAAAAA	intronic antisense	NM_020973	GBA3	cytosolic beta-glucosidase isoform a	+	22694547	22821192
ASHG19A3A024017	2573.06	2440.71	11.2396	11.3396	noncoding	ENST00000421246	RP11-800K23.2	Ensembl	576	chr4	-	22728997	22729573	NM_001791,NM_001039802,ENST00000456658,	CCTAAAGAATGTATTTGACGAAGCAATATTGGCTGCCCTGGAGCCTCCAGAACCGAAAAA	intronic antisense	NM_001128432	GBA3	cytosolic beta-glucosidase isoform b	+	22694547	22821192
ASHG19A3A022375	94337.8	112655	16.5466	16.7677	noncoding	ENST00000458542	AC092798.2	Ensembl	409	chr3	+	25790978	25791387		ACTGTGCTGAGATTGCTCACAATGTTTCCTCCAAGAACTGCAAAGCCATCATGGAAAGAG	intronic antisense	NM_018297	NGLY1	peptide-N(4)-(N-acetyl-beta-	-	25760434	25824989
ASHG19A3A022375	94337.8	112655	16.5466	16.7677	noncoding	ENST00000458542	AC092798.2	Ensembl	409	chr3	+	25790978	25791387		ACTGTGCTGAGATTGCTCACAATGTTTCCTCCAAGAACTGCAAAGCCATCATGGAAAGAG	intronic antisense	NM_001145293	NGLY1	peptide-N(4)-(N-acetyl-beta-	-	25760434	25824989
ASHG19A3A022375	94337.8	112655	16.5466	16.7677	noncoding	ENST00000458542	AC092798.2	Ensembl	409	chr3	+	25790978	25791387		ACTGTGCTGAGATTGCTCACAATGTTTCCTCCAAGAACTGCAAAGCCATCATGGAAAGAG	intronic antisense	NM_001145294	NGLY1	peptide-N(4)-(N-acetyl-beta-	-	25760434	25831530
ASHG19A3A022375	94337.8	112655	16.5466	16.7677	noncoding	ENST00000458542	AC092798.2	Ensembl	409	chr3	+	25790978	25791387		ACTGTGCTGAGATTGCTCACAATGTTTCCTCCAAGAACTGCAAAGCCATCATGGAAAGAG	intronic antisense	NM_001145295	NGLY1	peptide-N(4)-(N-acetyl-beta-	-	25760434	25824989
ASHG19A3A040275	422.219	398.256	8.62779	8.72873	noncoding	uc001hmu.2	BC045735	UCSC_knowngene	959	chr1	+	221002596	221005768		AAAGCAAGGGCAGGTCTCTGTGCCCCATCTCTAGCTTTTCCTCAACTTAGGCTTTATAAA	intergenic
ASHG19A3A025125	68.2721	85.6542	6.015	6.49256	noncoding	ENST00000514074	AF146191.1	Ensembl	484	chr4	-	190959070	190959554	ENST00000394842,	AAATGGACTGTGAGGATAAGGTTCTGGGCAGGATGGTTCGCTGCCCTCCAGAGACGCAGA	intergenic
ASHG19A3H0000127	162.925	304.721	7.26553	8.34354	noncoding	nc-HOXC5-253-	nc-HOXC5-253	HOX cluster	278	chr12	+	54425091	54425369		ACAAAATTCCTTCTTCATTACAGCTCCAGCCGGGCTGGTTCCTTACTTTTCTCTCCTCAA	intron sense-overlapping	NM_014620	HOXC4	homeobox protein Hox-C4	+	54410641	54449814
ASHG19A3A016930	137606	151713	17.1014	17.17	noncoding	ENST00000457497	AC016708.2	Ensembl	318	chr2	+	215711851	215712169	NR_026898,NM_006013,	ATGGTGGCTGAGAAGTGGCTCATCCCAGATGGCTGTGGGGTCAAGTACATCCCCAATCGT	intergenic
ASHG19A3A030989	172.381	102.991	7.34503	6.76343	noncoding	uc003mzz.1	BC038755	UCSC_knowngene	1486	chr6	+	11487462	11516747		GGCCACTTAATCACTGAATATTTACCCACGGACCTTTCACTGAATATATTAAACACTAAA	intergenic
ASHG19A3A028108	82.6882	74.9371	6.29124	6.30693	noncoding	AL713738		misc_RNA	1301	chr5	+	35878417	35879701		CAAACATTTCGCAGAGCTGCTTAGTATATAAGCGTACAATGTATGTAATAACCATCTCAT	intergenic
ASHG19A3A036817	333.055	366.046	8.2914	8.61293	noncoding	uc003ykw.1	CR608006	UCSC_knowngene	2774	chr8	+	103819049	103822203		ATTCTGTGACGTGTACCCAGTATTTATTGGAGGGTATTTCCTAGCAAGAAAATGAGGGCG	intergenic
ASHG19A3A019633	267.721	269.438	7.98386	8.15996	noncoding	G43204		misc_RNA	207	chr22	-	27283889	27284096		TCCCTACTCCGCACTCACCTGTCTAATTGGACCTGAAGCTTCAGCATCCCTTCTTTAGGG	intergenic
ASHG19A3A023710	420.295	187.838	8.61791	7.63543	noncoding	ENST00000397646	RP11-332P22.2	Ensembl	1209	chr3	+	190548753	190549962	NM_001008493,	ACAAAGCTAAAAGAAGAGCTCATTGATGCAATCAGGCAGACACTGAGCAAGTCAAATACT	intergenic
ASHG19A3A046642	106.185	67.5097	6.65789	6.1559	noncoding	AK094046		RNAdb	2338	chr11	+	66433506	66435845		TTCCTAGAATTCTCTAATCCTTCTATTGATGATGGGAACTCCAGACACCAATGGCTGGGG	intronic antisense	NM_031492	RBM4B	RNA-binding protein 4B	-	66432469	66445275
ASHG19A3A046642	106.185	67.5097	6.65789	6.1559	noncoding	AK094046		RNAdb	2338	chr11	+	66433506	66435845		TTCCTAGAATTCTCTAATCCTTCTATTGATGATGGGAACTCCAGACACCAATGGCTGGGG	exon sense-overlapping	NM_001198844	RBM4	RNA-binding protein 4 isoform 3	+	66406087	66435858
ASHG19A3A021360	263.922	265.821	7.9617	8.13999	noncoding	ENST00000478559	RP11-628J14.1	Ensembl	1853	chr3	-	103257478	103259331		CCATATTACATGCTCCCTGACCCACACAATTTCTCATGGAGAAAAAGATGACTTACCTTA	intergenic
ASHG19A3A050203	34966.6	42506	15.0438	15.4154	noncoding	uc001vfo.1	D28359	UCSC_knowngene	2420	chr13	+	52033095	52035515		CCCAGGGTGACATGTTAGATCTTTGTACGTAATTGAAAATAATGTGGCAAGATTAATAGC	intergenic
ASHG19A3A000092	108.635	123.8	6.69098	7.03564	noncoding	ENST00000412422	RP4-562J12.2	Ensembl	2290	chrX	+	117973518	117991849	uc004eqv.2,	TAAAGTAATCCCTCTTTTTCCTGGGCTATACCATCTGGAACAGATGACTTCCAAGGACAC	intergenic
ASHG19A3A039323	263.267	177.06	7.95832	7.55437	noncoding	uc004bxy.1	AK024177	UCSC_knowngene	1670	chr9	+	132251385	132275963		CCAGACACTGAACTGCCTTTGGAAGCAAGTAGGAGCAACAGCGAAGGTTTGCTGGCTCAG	intergenic
ASHG19A3A017486	631.515	465.117	9.20576	8.95693	noncoding	ENST00000447582	GGTLA4	Ensembl	150	chr20	-	23961221	23961371		GACCCCCAGGCCTTTGCCCACGCCGCTGTTGCTGCTGACTCCAAGGTCTGCTCAAATATT	intergenic
ASHG19A3L0000483	111.358	91.4192	6.72487	6.58402	noncoding	BQ447228	lincRNA-ALG10-1	lincRNA	403	chr12	-	38450353	38450755		TTTTACTTTACTTTCTTTCTTCCTTTGTTGAGCTTGAGTAGGGGGTACAGGGGTGAGGGT	intergenic
ASHG19A3A037780	202.632	132.057	7.57879	7.12745	noncoding	ENST00000421962	AL445670.1	Ensembl	783	chr9	-	99914184	99914976	uc004abd.1,ENST00000454116,ENST00000427913,ENST00000424993,	ATGGACTCACAGATGCAGCATTTCTTGCAACAAGAGATACTATTTTTTCAAAAAGTCACC	intergenic
ASHG19A3A038404	2487.89	1403.94	11.1885	10.5401	noncoding	ENST00000441073	RP11-296P7.4	Ensembl	1238	chr9	+	19026889	19028127		GTCTTGTCAATGAACCACAAGGAGAAGTTTGAGAACTTGCGGATCCAACATCCAAAAGGG	intronic antisense	NM_153707	FAM154A	hypothetical protein LOC158297	-	18927890	19033256
ASHG19A3A016865	155.64	180.36	7.19966	7.57862	noncoding	ENST00000458609	AC007679.1	Ensembl	504	chr2	+	206813814	206814871		AAGATTCCAAAGACGGCAGAAAACTTTCACTCCTGAGCACTGGAGAGAAAGGATTTGGTT	intergenic
ASHG19A3A039675	499.663	363.109	8.86741	8.60005	noncoding	ENST00000508288	AC117517.1	Ensembl	2459	chrX	-	23093707	23096495		GCTACCCTCATGTTTGGTTTTTCAGTTTATGGCACTTTTCATTAATATGCTCCGGCCTCC	intergenic
ASHG19A3A028869	3883.71	1806.2	11.8466	10.9092	noncoding	ENST00000513338	AC138517.4	Ensembl	1861	chr5	+	138873840	138875701	NM_005437,NM_001145263,NM_001145262,NM_001145261,NM_001145260,	CTGCAGTTTGTGATCTCTTTGCCTGTATGTAGCTTAAAGTTGATAAAGATAAGTGGTTAT	intergenic
ASHG19A3A014839	833.812	841.015	9.6143	9.80239	noncoding	uc002uvy.1	BC047410	UCSC_knowngene	2050	chr2	-	201577027	201599900		AGAATCAGGCTGTCTGGTTTGGAAAATAAATTTTGACACTGCTCTGTCCTCCCTGTCCTG	intergenic
ASHG19A3A039576	2431.84	1973.26	11.1568	11.0394	noncoding	ENST00000436419	RP11-66N5.2	Ensembl	2081	chrX	-	8948465	8950546		AAGAAGCAGGGCATCTCCTGGGGAGGCTCAATCTCTGTCCAGGTCAATTCTATTAATTTT	intergenic
ASHG19A3A043913	90.6673	83.4906	6.42694	6.45699	noncoding	ENST00000425165	RP11-542E6.3	Ensembl	719	chr10	+	49500741	49501460		ATTGCCAACAGACCGAGGCTATTTTCTCTGAAAGCTTCTACCTCTGAGTCCAGTCAAAAA	intergenic
ASHG19A3A038606	5511.89	5497.26	12.3485	12.5095	noncoding	uc004acc.3	LOC554249	UCSC_knowngene	1352	chr9	+	42018943	42020410	NR_015363,ENST00000377613,	CTTTCTAGATCAAATGCTGTTTTCCATGACTGTCTCTGTTCTTCCCATACGCGAATGGCA	intergenic
ASHG19A3A028861	263.813	240.866	7.96127	7.99368	noncoding	AK022326		NRED	2064	chr5	+	138270642	138272706		TAAAATGTATGCACAATTTACCTGTTACCGCCTGGCCTAAGCCATCCTGCTGTTACTGCT	exon sense-overlapping	NM_001903	CTNNA1	catenin alpha-1	+	138089106	138270723
ASHG19A3A016909	165.555	137.169	7.28809	7.18133	noncoding	uc002vdu.1	AK093026	UCSC_knowngene	2199	chr2	+	210895456	210929080		TTTTCTTTCTTCCCTGTAACAGTTGTGCAGAAGATTCTGACCTTATTTGAGGCTTACATA	natural antisense	NM_152519	C2orf67	hypothetical protein LOC151050	-	210885434	211036051
ASHG19A3A055218	414.363	386.947	8.5991	8.68881	noncoding	ENST00000376792	HLA-J	Ensembl	1666	chr6	+	29973747	29977729	uc003nov.3,	GCTGTGATGTGGAGGAAGAAGAGCTCAGTCACACATTTCTGGAAACTTCTCAAGGTTCCA	intergenic
ASHG19A3A016377	1310.29	314.452	10.2658	8.38759	noncoding	ENST00000431979	AC093838.7	Ensembl	3516	chr2	+	132394597	132407188		TTGCTTGAGAAAATCAGATAATTGCTTGAGAAAATTAGGACATTGCTTGAGGAAGTTAGG	intergenic
ASHG19A3A013587	73.2946	65.6937	6.11549	6.11716	noncoding	ENST00000418415	AC016912.3	Ensembl	570	chr2	-	46619435	46621306		ACAAACAAACACAAACCCACTTTGCGTTCTGTGAGTGTGCATGTATGTTGGTCCCTAGGT	intergenic
ASHG19A3A044568	3831.26	5491.43	11.8284	12.508	noncoding	ENST00000454541	RP11-179H18.5	Ensembl	627	chr10	+	121397967	121398594		ATTCAGAAGAAATACGATGAAAGGGAAAAGAATGCCAAAATCAGCCGTCTCCTGGGGGAG	intergenic
ASHG19A3A050875	317.883	399.865	8.22528	8.73665	noncoding	AK097323		RNAdb	1868	chr14	-	64907088	64908956		CAAATCATCTGGAACTTGTGATCTATTACTAAAGCATACCAGCTATTATTCACTCTGATG	natural antisense	NM_005956	MTHFD1	"C-1-tetrahydrofolate synthase, cytoplasmic"	+	64854758	64926725
ASHG19A3A022876	27493.5	34725.9	14.679	15.1287	noncoding	ENST00000485383	RP11-598F17.1	Ensembl	1386	chr3	+	96068397	96069783	NM_031263,NM_002140,	CCAGATACAGAATGCACAGTATTTGCTGCAGAACAGTGTGAAGCAGTGTGCAGATGTTGA	intergenic
ASHG19A3A022037	189.212	142.539	7.47918	7.23569	noncoding	AK022438		misc_RNA	1913	chr3	-	185201519	185203432		GCAAGCTGCTTGTTTTTGCTTTTATTCTGACAGTGGTAGCCAGTCATTAAGACTTCTAAG	intergenic
ASHG19A3A013635	277.354	449.683	8.03154	8.91032	noncoding	ENST00000418851	AC008280.1	Ensembl	412	chr2	-	54256688	54257819		GAAAAAGAAGGAAGCCAAAGAGAAAGTTACCTGGATTCAACTGAAGCACCAGTCAGCTCC	intergenic
ASHG19A3A044330	50946.7	52773.3	15.6048	15.7035	noncoding	ENST00000398190	RP11-7D5.2	Ensembl	775	chr10	+	97354354	97355129		GGACAAGACAGGTGCTAAAGTCGAATGAGCTGATGGATATGAATGACCAGTCCAAGAATC	intergenic
ASHG19A3A013694	41788.4	47345.3	15.3031	15.567	noncoding	ENST00000439197	AC016727.3	Ensembl	166	chr2	-	61816632	61816798		ACAATATGTGCCTCCAGTGTTTCCATCGGTATGCGAAGGATATAGGTTTCATTAAGTTGG	intergenic
ASHG19A3L0001330	176.96	146.967	7.38349	7.28248	noncoding	AA420793	lincRNA-RAP2B-1	lincRNA	359	chr3	+	152716537	152716874		CCACCTCTAGCATTTATTTAATGTGACATTTAAATCTTTTGTGCTTCAGTTTCCTGACAC	intergenic
ASHG19A3A055272	444.67	525.564	8.70432	9.13405	noncoding	uc010bys.1	RUNDC2B	UCSC_knowngene	5132	chr16	+	29339873	29418349		ccttggcctcccaaagtgctgggattacagagtctcgctctgtcgcacagtctggagtgc	intergenic
ASHG19A3A048979	152.928	213.119	7.17533	7.82181	noncoding	ENST00000420901	RP11-251P6.1	Ensembl	410	chr1	-	106132315	106161540		CTGAGGAAATATGCATTGATCTTGCAGTACTTTTCTCCTCCAAATAAAAGTCAGTATGAT	intergenic
ASHG19A3A012958	354.049	368.687	8.37701	8.62227	noncoding	ENST00000379317	RP11-465B22.6	Ensembl	3532	chr1	-	1108435	1114935		TTCTCTGTGCTTCACGTGGTCGGGTCCCTGTTCTCACTCCACAGCGGACGAGGTGCCACT	natural antisense	NM_001130045	TTLL10	inactive polyglycylase TTLL10 isoform 1	+	1109285	1133313
ASHG19A3A012958	354.049	368.687	8.37701	8.62227	noncoding	ENST00000379317	RP11-465B22.6	Ensembl	3532	chr1	-	1108435	1114935		TTCTCTGTGCTTCACGTGGTCGGGTCCCTGTTCTCACTCCACAGCGGACGAGGTGCCACT	bidirectional	NM_153254	TTLL10	inactive polyglycylase TTLL10 isoform 2	+	1115076	1121243
ASHG19A3A015692	2258.81	2185.62	11.0473	11.1852	noncoding	AK123369		misc_RNA	2244	chr2	+	61153043	61155287		CTAATACTTCAGGAAAACTCATGATGGTTTCCATGTTAAGAGAGACATGGAGCAGGGCAC	intergenic
ASHG19A3A034227	122.679	108.673	6.86076	6.84336	noncoding	ENST00000426456	AC011290.3	Ensembl	532	chr7	+	39504690	39532694		AACAAAAACTTTGATCTGTTCAAAGCGAATACAAGCCTGCCACCTGGAGGAAGGACTGCA	intergenic
ASHG19A3A047793	46547.3	42757.3	15.4676	15.4235	noncoding	ENST00000483913	RP11-254B13.1	Ensembl	885	chr12	-	68946777	68947662	NR_026890,NR_026825,NR_003662,NM_002295,NM_001012321,ENST00000493929,ENST00000488229,ENST00000484897,ENST00000483479,ENST00000464073,ENST00000454001,ENST00000453374,ENST00000445182,ENST00000443010,ENST00000442699,ENST00000435879,ENST00000433498,ENST00000431241,ENST00000418207,ENST00000412542,ENST00000339991,	TCTACAGAGATCCTGAAGAGATTGAAAAAGAAGAGCAGGCTGCTGCTGAAAAGGCAGTGA	intergenic
ASHG19A3A007122	581.875	668.002	9.08863	9.47301	noncoding	NR_003103	POT1	RefSeq_NR	4006	chr7	-	124462440	124570037		TTCTTATACAAGGAACAATACATCACTATGGCACTGGGTATTGTACCCCTCCAATATGTG	exon sense-overlapping	NM_001042594	POT1	protection of telomeres protein 1 isoform 4	-	124462439	124570037
ASHG19A3A007122	581.875	668.002	9.08863	9.47301	noncoding	NR_003103	POT1	RefSeq_NR	4006	chr7	-	124462440	124570037		TTCTTATACAAGGAACAATACATCACTATGGCACTGGGTATTGTACCCCTCCAATATGTG	exon sense-overlapping	NM_015450	POT1	protection of telomeres protein 1 isoform 1	-	124462439	124570037
ASHG19A3A013307	121.212	66.8035	6.84173	6.14017	noncoding	ENST00000431117	AC008278.3	Ensembl	568	chr2	-	15808807	15820608		ATTAACTTGTTATTCTAAGTAATCCTCTGTTGAAAGCTGTGAGCCGCCTGGGGTGGACGA	intergenic
ASHG19A3A041283	2005.2	1734.2	10.8789	10.8524	noncoding	ENST00000448218	RP13-75G22.1	Ensembl	1435	chrX	+	97161641	97163076		CTATGGAGAGCCAATCATTACGAGTCTTTACACAAATTGGTATTTGGAAACTTTGTTAAG	intergenic
ASHG19A3A023951	415.62	412.986	8.6027	8.78433	noncoding	AK091452		misc_RNA	2162	chr4	-	10411476	10412738		TTTTACAGTGTTGCTCACTTCAACAATAAAGGCAGTCTCCTCCACAGCCTGATAGTCTCC	intergenic
ASHG19A3A000110	377.618	388.339	8.47251	8.69366	noncoding	ENST00000415513	RP11-325F22.2	Ensembl	685	chr7	+	104581509	104602507		CCTCCTCTAGCCCTGCATAGCCCAGAAGCTACAACCTCAGCCCAGATTAGCAGGCTGAGG	intergenic
ASHG19A3A037575	114.931	123.25	6.76756	7.02956	noncoding	BC043560		misc_RNA	1705	chr9	-	75705767	75839108		GTGTTTCCAGCAAAGCAGCCCTCTGATCCATATACTTTAGCTACAACTTACATCACCAAG	intronic antisense	NM_000700	ANXA1	annexin A1	+	75766780	75785307
ASHG19A3A040525	400.323	166.676	8.55361	7.46525	noncoding	AK025525		misc_RNA	2225	chrX	-	150574867	150577076		CAAGTCAATTGGTTGTTTCTTTTGGCAAAGCTGATGACATTTTCATGATGAAAATGTTCC	natural antisense	NM_001017980	VMA21	vacuolar ATPase assembly integral membrane	+	150565656	150577836
ASHG19A3A025178	68.0136	98.7741	6.00897	6.69906	noncoding	ENST00000502641	RP11-503N18.4	Ensembl	220	chr4	+	2465523	2465851		AGAAGAAAGTACATTAAGCCACCTTCTTCCCAGGAAAGAGAGAAAAGCGTCAAGTCCGTG	intergenic
ASHG19A3A000426	861.274	1163.4	9.66031	10.2736	noncoding	ENST00000501177	AC108084.1	Ensembl	628	chr16	-	54952843	54962463		CGGCTTTCCGGAGTAGAGCCCTTGGAGGTGTTAAGTGTGATGCTTCCATAATACATTTGG	intergenic
ASHG19A3A009862	81.5916	86.7212	6.27249	6.51018	noncoding	AL117652		NRED	2641	chr17	+	66624294	66675747		GGACTCATTGAATATGTGTGCTCTTTCTACTCAAGTGCTTCAAGGATCCTTCCTGGAAAA	intergenic
ASHG19A3A045233	176.047	807.161	7.37526	9.74451	noncoding	ENST00000450983	RP4-669L17.2	Ensembl	607	chr1	-	453632	460480		CAATCCTGGGGCAGGGAGGGGAGGCCCAGCTGAGTTTGGATCATAATCCTGAAAGACACA	intergenic
ASHG19A3A007132	956.38	699.449	9.81247	9.53838	noncoding	NR_003189	SYS1-DBNDD2	RefSeq_NR	1330	chr20	+	43991839	44039245		ATGTCCTTCATCCTCAACGCCCTCACCTGGAGCTGACATGGACCCAAATCCTCGGGCCGC	exon sense-overlapping	NM_001048225	DBNDD2	dysbindin domain-containing protein 2 isoform c	+	44036628	44039250
ASHG19A3A007132	956.38	699.449	9.81247	9.53838	noncoding	NR_003189	SYS1-DBNDD2	RefSeq_NR	1330	chr20	+	43991839	44039245		ATGTCCTTCATCCTCAACGCCCTCACCTGGAGCTGACATGGACCCAAATCCTCGGGCCGC	exon sense-overlapping	NM_001048221	DBNDD2	dysbindin domain-containing protein 2 isoform a	+	44034654	44039250
ASHG19A3A007132	956.38	699.449	9.81247	9.53838	noncoding	NR_003189	SYS1-DBNDD2	RefSeq_NR	1330	chr20	+	43991839	44039245		ATGTCCTTCATCCTCAACGCCCTCACCTGGAGCTGACATGGACCCAAATCCTCGGGCCGC	exon sense-overlapping	NM_001048223	DBNDD2	dysbindin domain-containing protein 2 isoform a	+	44035227	44039250
ASHG19A3A007132	956.38	699.449	9.81247	9.53838	noncoding	NR_003189	SYS1-DBNDD2	RefSeq_NR	1330	chr20	+	43991839	44039245		ATGTCCTTCATCCTCAACGCCCTCACCTGGAGCTGACATGGACCCAAATCCTCGGGCCGC	exon sense-overlapping	NM_001048224	DBNDD2	dysbindin domain-containing protein 2 isoform b	+	44035227	44039250
ASHG19A3A007132	956.38	699.449	9.81247	9.53838	noncoding	NR_003189	SYS1-DBNDD2	RefSeq_NR	1330	chr20	+	43991839	44039245		ATGTCCTTCATCCTCAACGCCCTCACCTGGAGCTGACATGGACCCAAATCCTCGGGCCGC	exon sense-overlapping	NM_001197129	SYS1	protein SYS1 homolog isoform a	+	43990576	43997862
ASHG19A3A007132	956.38	699.449	9.81247	9.53838	noncoding	NR_003189	SYS1-DBNDD2	RefSeq_NR	1330	chr20	+	43991839	44039245		ATGTCCTTCATCCTCAACGCCCTCACCTGGAGCTGACATGGACCCAAATCCTCGGGCCGC	exon sense-overlapping	NM_001099791	SYS1	protein SYS1 homolog isoform b	+	43991739	44005442
ASHG19A3A007132	956.38	699.449	9.81247	9.53838	noncoding	NR_003189	SYS1-DBNDD2	RefSeq_NR	1330	chr20	+	43991839	44039245		ATGTCCTTCATCCTCAACGCCCTCACCTGGAGCTGACATGGACCCAAATCCTCGGGCCGC	exon sense-overlapping	NM_001048226	DBNDD2	dysbindin domain-containing protein 2 isoform d	+	44036628	44039250
ASHG19A3A007132	956.38	699.449	9.81247	9.53838	noncoding	NR_003189	SYS1-DBNDD2	RefSeq_NR	1330	chr20	+	43991839	44039245		ATGTCCTTCATCCTCAACGCCCTCACCTGGAGCTGACATGGACCCAAATCCTCGGGCCGC	exon sense-overlapping	NM_018478	DBNDD2	dysbindin domain-containing protein 2 isoform e	+	44034860	44039250
ASHG19A3A007132	956.38	699.449	9.81247	9.53838	noncoding	NR_003189	SYS1-DBNDD2	RefSeq_NR	1330	chr20	+	43991839	44039245		ATGTCCTTCATCCTCAACGCCCTCACCTGGAGCTGACATGGACCCAAATCCTCGGGCCGC	exon sense-overlapping	NM_001048222	DBNDD2	dysbindin domain-containing protein 2 isoform b	+	44034654	44039250
ASHG19A3A007132	956.38	699.449	9.81247	9.53838	noncoding	NR_003189	SYS1-DBNDD2	RefSeq_NR	1330	chr20	+	43991839	44039245		ATGTCCTTCATCCTCAACGCCCTCACCTGGAGCTGACATGGACCCAAATCCTCGGGCCGC	exon sense-overlapping	NM_033542	SYS1	protein SYS1 homolog isoform a	+	43991739	43997862
ASHG19A3A007132	956.38	699.449	9.81247	9.53838	noncoding	NR_003189	SYS1-DBNDD2	RefSeq_NR	1330	chr20	+	43991839	44039245		ATGTCCTTCATCCTCAACGCCCTCACCTGGAGCTGACATGGACCCAAATCCTCGGGCCGC	intronic antisense	NM_014477	TP53TG5	TP53-target gene 5 protein	-	44002519	44006957
ASHG19A3A007132	956.38	699.449	9.81247	9.53838	noncoding	NR_003189	SYS1-DBNDD2	RefSeq_NR	1330	chr20	+	43991839	44039245		ATGTCCTTCATCCTCAACGCCCTCACCTGGAGCTGACATGGACCCAAATCCTCGGGCCGC	exon sense-overlapping	NM_001197140	DBNDD2	dysbindin domain-containing protein 2 isoform a	+	44034820	44039250
ASHG19A3A007132	956.38	699.449	9.81247	9.53838	noncoding	NR_003189	SYS1-DBNDD2	RefSeq_NR	1330	chr20	+	43991839	44039245		ATGTCCTTCATCCTCAACGCCCTCACCTGGAGCTGACATGGACCCAAATCCTCGGGCCGC	exon sense-overlapping	NM_001197139	DBNDD2	dysbindin domain-containing protein 2 isoform a	+	44034632	44039250
ASHG19A3A021430	273.536	193.276	8.0125	7.67741	noncoding	BC030754		misc_RNA	1129	chr3	-	113432184	113433267		GATTTAACGTATGCATTTAAAAGGACAAAAATTCTGCATTAAGAACTTGGGAGAGGGGTT	intergenic
ASHG19A3A022653	9600.95	13563.9	13.1581	13.7997	noncoding	ENST00000420575	RP4-631H13.6	Ensembl	193	chr1	+	53386076	53386269	NM_015933,	AAGGCCACGGGGAAGGGGCCCTTGGCCACAAGTGGAATTAAGAAATCTGGCAAAAAGTAA	intronic antisense	NM_001198961	ECHDC2	"enoyl-CoA hydratase domain-containing protein 2,"	-	53361581	53387446
ASHG19A3A022653	9600.95	13563.9	13.1581	13.7997	noncoding	ENST00000420575	RP4-631H13.6	Ensembl	193	chr1	+	53386076	53386269	NM_015933,	AAGGCCACGGGGAAGGGGCCCTTGGCCACAAGTGGAATTAAGAAATCTGGCAAAAAGTAA	intronic antisense	NM_018281	ECHDC2	"enoyl-CoA hydratase domain-containing protein 2,"	-	53361581	53387446
ASHG19A3A022653	9600.95	13563.9	13.1581	13.7997	noncoding	ENST00000420575	RP4-631H13.6	Ensembl	193	chr1	+	53386076	53386269	NM_015933,	AAGGCCACGGGGAAGGGGCCCTTGGCCACAAGTGGAATTAAGAAATCTGGCAAAAAGTAA	intronic antisense	NM_001198962	ECHDC2	"enoyl-CoA hydratase domain-containing protein 2,"	-	53361581	53387446
ASHG19A3A034556	2293.29	1586.89	11.0725	10.7175	noncoding	NR_027777	PMS2L5	RefSeq_NR	1109	chr7	+	74306893	74336165	ENST00000423426,	CTCAAATTCACGAGCAAAAGAGGGGGAATTCTGTTTGAAATGCCAAAAAGAACTCTTTCT	bidirectional	NM_001025202	STAG3L2	STAG3-like protein 2	-	74299282	74306731
ASHG19A3A023273	11607.4	8781.7	13.4291	13.1767	noncoding	ENST00000485881	RP11-598P12.1	Ensembl	1943	chr3	+	137599136	137601079		TGAGTGTGCCATGACCAAGGATAACAACTGTTTGGCAAGTTTGAACTCACAGGCATACCT	intergenic
ASHG19A3A046013	406.3	466.157	8.57422	8.95938	noncoding	uc001lxz.1	AB231779	UCSC_knowngene	886	chr11	+	3638461	3647749	ENST00000451043,	TTGGCGGGGAAGCACCACCAGCTGGAAGCTCTTTGCTACCTTCCTCATCTTCCTCACCAT	intergenic
ASHG19A3A050672	35763.3	48848.7	15.08	15.6072	noncoding	ENST00000423806	AL163052.1	Ensembl	273	chr14	-	25736269	25736542	uc002ibd.1,uc001zvn.1,NR_022014,NM_005517,ENST00000506772,ENST00000457049,ENST00000456186,ENST00000436882,ENST00000433603,ENST00000433516,ENST00000398614,ENST00000397765,	AATGGAGATGCCAAAACAGACCAGGCACAGAAAGCTGAAGGTGCTGGAGATGCCAAGTGA	intergenic
ASHG19A3A049555	67.1076	67.7067	5.98845	6.16056	noncoding	ENST00000425350	RP11-165D7.4	Ensembl	962	chr13	-	49151109	49152224		CCTTTCTTCCCATAGCTTCCAGCCTGGTGGGGAATAAAGGAATTAAATAAGCAATTACAA	intergenic
ASHG19A3A026261	284.054	553.87	8.06588	9.20991	noncoding	ENST00000513444	RP11-366M4.4	Ensembl	1419	chr4	+	165836716	165838135		GAGCACTTTGGCCTTATTTTTATACTGGAACTGACTCAAAACCTCTTAAAATTTCTACAG	intergenic
ASHG19A3A038022	201.118	191.65	7.56573	7.66507	noncoding	ENST00000429482	RP11-85O21.5	Ensembl	581	chr9	-	126793902	126794803		GAGCTCTGCTGCCTCTGGGGACGCTGATCTGTGTTTTGCCAAGAGGATCCAAAAAGTCAG	natural antisense	NM_004789	LHX2	LIM/homeobox protein Lhx2	+	126773888	126795442
ASHG19A3A000428	400.341	522.247	8.55371	9.12363	noncoding	ENST00000501525	AL031427.1	Ensembl	2245	chr1	+	54447916	54452234		CTAATAAAGATCTAGTATCCAGAATGCATGAGCCACCGTGCCTGGCCGACATTGTATATT	intergenic
ASHG19A3A033750	152.125	147.083	7.16796	7.28352	noncoding	AK124944		misc_RNA	1867	chr7	-	150748600	150750467		AGAAGATGTCCAGGGCCAGCACGTTCTCCCTGAGGACAAGAATGGCCTCAAATGTGGGCT	natural antisense	NM_004769	ACCN3	amiloride-sensitive cation channel 3 isoform a	+	150745604	150749843
ASHG19A3A033750	152.125	147.083	7.16796	7.28352	noncoding	AK124944		misc_RNA	1867	chr7	-	150748600	150750467		AGAAGATGTCCAGGGCCAGCACGTTCTCCCTGAGGACAAGAATGGCCTCAAATGTGGGCT	natural antisense	NM_020321	ACCN3	amiloride-sensitive cation channel 3 isoform b	+	150745604	150749843
ASHG19A3A033750	152.125	147.083	7.16796	7.28352	noncoding	AK124944		misc_RNA	1867	chr7	-	150748600	150750467		AGAAGATGTCCAGGGCCAGCACGTTCTCCCTGAGGACAAGAATGGCCTCAAATGTGGGCT	natural antisense	NM_020322	ACCN3	amiloride-sensitive cation channel 3 isoform c	+	150745604	150749843
ASHG19A3A000255	553.062	571.482	9.0146	9.25125	noncoding	ENST00000439498	RP4-694B14.5	Ensembl	964	chr20	+	25604694	25658184		AACATGCTTTACTCCTGCCAGGCAGCTGTGTCACTCTGGAAGCTTTGATCAGAAAATTGT	bidirectional	NM_152667	NANP	N-acylneuraminate-9-phosphatase	-	25593572	25604648
ASHG19A3A000255	553.062	571.482	9.0146	9.25125	noncoding	ENST00000439498	RP4-694B14.5	Ensembl	964	chr20	+	25604694	25658184		AACATGCTTTACTCCTGCCAGGCAGCTGTGTCACTCTGGAAGCTTTGATCAGAAAATTGT	natural antisense	NM_015655	ZNF337	zinc finger protein 337	-	25654850	25677469
ASHG19A3A007495	127.852	166.367	6.91897	7.46192	noncoding	NR_027286	LQK1	RefSeq_NR	688	chr1	-	213029946	213031480		GAATGTGCTGATGTGCCCACTAAAGAGGAATAACGCCAGAAAGTGTTCCAGTACAACCAG	bidirectional	NM_014053	FLVCR1	feline leukemia virus subgroup C	+	213031596	213072705
ASHG19A3A019272	50.7734	69.1657	5.58218	6.19243	noncoding	G36681		misc_RNA	424	chr21	+	41384845	41385269		AAGATTTTGCGTAAGGATTGTTTCCTTTCAAATGGCCCCGGGAGTCGAGCAGTGATTCTT	natural antisense	NM_001389	DSCAM	Down syndrome cell adhesion molecule isoform	-	41384342	42219039
ASHG19A3L0001866	1014.17	986.325	9.90249	10.0298	noncoding	chr7:1348449-1366599+	lincRNA-MICALL2	lincRNA	18151	chr7	+	1348449	1366599		TTATATTGAAGTATTATTATTATTCGATGTCTGTCCCCACACTCCTAGCCAGCCTCCACC	intergenic
ASHG19A3A049107	84.3543	70.7431	6.31952	6.22303	noncoding	uc001txs.1	CR607463	UCSC_knowngene	1170	chr12	+	120639173	120650941		AAATCAACAAGACCAAAGAGACGTCAGAGTCCTGATGGCCAAAATCAGACACCAGCTTTC	natural antisense	NM_002859	PXN	paxillin isoform 2	-	120648249	120703563
ASHG19A3A049107	84.3543	70.7431	6.31952	6.22303	noncoding	uc001txs.1	CR607463	UCSC_knowngene	1170	chr12	+	120639173	120650941		AAATCAACAAGACCAAAGAGACGTCAGAGTCCTGATGGCCAAAATCAGACACCAGCTTTC	natural antisense	NM_025157	PXN	paxillin isoform 3	-	120648249	120687957
ASHG19A3A049107	84.3543	70.7431	6.31952	6.22303	noncoding	uc001txs.1	CR607463	UCSC_knowngene	1170	chr12	+	120639173	120650941		AAATCAACAAGACCAAAGAGACGTCAGAGTCCTGATGGCCAAAATCAGACACCAGCTTTC	bidirectional	NM_053275	RPLP0	60S acidic ribosomal protein P0	-	120634502	120639014
ASHG19A3A049107	84.3543	70.7431	6.31952	6.22303	noncoding	uc001txs.1	CR607463	UCSC_knowngene	1170	chr12	+	120639173	120650941		AAATCAACAAGACCAAAGAGACGTCAGAGTCCTGATGGCCAAAATCAGACACCAGCTTTC	bidirectional	NM_001002	RPLP0	60S acidic ribosomal protein P0	-	120634502	120639014
ASHG19A3A049107	84.3543	70.7431	6.31952	6.22303	noncoding	uc001txs.1	CR607463	UCSC_knowngene	1170	chr12	+	120639173	120650941		AAATCAACAAGACCAAAGAGACGTCAGAGTCCTGATGGCCAAAATCAGACACCAGCTTTC	natural antisense	NM_001080855	PXN	paxillin isoform 1	-	120648249	120703563
ASHG19A3A035125	371.4	402.118	8.44694	8.74442	noncoding	ENST00000440744	AC024084.1	Ensembl	457	chr7	+	135710508	135769416		ACATCTCCATTTTCACATAAGCTCCCCAACTCTCAAGAAGACATGTCAAACTTCAAAGAA	intergenic
ASHG19A3A020698	275.707	321.773	8.02386	8.42013	noncoding	AF220047		misc_RNA	1167	chr3	-	10157359	10168874		AAAGTCTGCGATTTTCTTGATGCTGCTGGTGATTATCTCAATGTACTCCCGGTTAGCCCA	natural antisense	NM_018462	C3orf10	protein BRICK1	+	10157332	10168874
ASHG19A3A026806	25357.3	15332.2	14.5629	13.9781	noncoding	uc003jqp.2	BC071555	UCSC_knowngene	2841	chr5	-	55232480	55235321		GCAGTGAATTGCATGTGCTAATTGTAACCACAGCTATTTTTATGTTGACATAACTCCAAA	exon sense-overlapping	NM_175767	IL6ST	interleukin-6 receptor subunit beta isoform 2	-	55230924	55290821
ASHG19A3A026806	25357.3	15332.2	14.5629	13.9781	noncoding	uc003jqp.2	BC071555	UCSC_knowngene	2841	chr5	-	55232480	55235321		GCAGTGAATTGCATGTGCTAATTGTAACCACAGCTATTTTTATGTTGACATAACTCCAAA	exon sense-overlapping	NM_002184	IL6ST	interleukin-6 receptor subunit beta isoform 1	-	55230924	55290821
ASHG19A3A026806	25357.3	15332.2	14.5629	13.9781	noncoding	uc003jqp.2	BC071555	UCSC_knowngene	2841	chr5	-	55232480	55235321		GCAGTGAATTGCATGTGCTAATTGTAACCACAGCTATTTTTATGTTGACATAACTCCAAA	exon sense-overlapping	NM_001190981	IL6ST	interleukin-6 receptor subunit beta isoform 3	-	55230924	55290821
ASHG19A3A016886	146.337	182.297	7.10989	7.59375	noncoding	ENST00000438824	AC007879.6	Ensembl	523	chr2	+	208125168	208135414		AGGTCACTTCCTGATTCCCAAAGCATCTGCCTGTACCATTGAAAACTTATTCCTGCTCAG	intergenic
ASHG19A3A035840	760.321	692.609	9.48232	9.52486	noncoding	ENST00000501063	AL359853.3	Ensembl	1574	chr1	+	179831572	179833589		GGTGCATCTCTGGGGTACATTCTTCATACAGACTAACAAATAACTTCAGGTTTCACAACA	intronic antisense	NM_145034	TOR1AIP2	torsin-1A-interacting protein 2 isoform b	-	179809101	179846941
ASHG19A3A035840	760.321	692.609	9.48232	9.52486	noncoding	ENST00000501063	AL359853.3	Ensembl	1574	chr1	+	179831572	179833589		GGTGCATCTCTGGGGTACATTCTTCATACAGACTAACAAATAACTTCAGGTTTCACAACA	natural antisense	NM_022347	TOR1AIP2	interferon alpha responsive protein isoform a	-	179828164	179846941
ASHG19A3A035840	760.321	692.609	9.48232	9.52486	noncoding	ENST00000501063	AL359853.3	Ensembl	1574	chr1	+	179831572	179833589		GGTGCATCTCTGGGGTACATTCTTCATACAGACTAACAAATAACTTCAGGTTTCACAACA	intronic antisense	NM_001199260	TOR1AIP2	torsin-1A-interacting protein 2 isoform b	-	179809101	179846941
ASHG19A3A026555	282.602	275.816	8.0582	8.19263	noncoding	ENST00000515300	CTB-40H15.2	Ensembl	253	chr5	-	14877775	14878028		AAGAATATGAAGTTTCTCCGTACAGACCACAATGCCAATGCTTTAGTCCCAGACAGCAGG	intergenic
ASHG19A3A041657	2629.33	3461.96	11.2695	11.8326	noncoding	ENST00000458303	RP11-434J24.2	Ensembl	298	chrX	+	146882522	146882820		AGAATGCACTATAACAGGAAAATCATATTATAGATGGAGTAAAGCTCCAGATTGGAGCTC	intergenic
ASHG19A3A044726	164.322	154.825	7.27825	7.35856	noncoding	AK095535		misc_RNA	2051	chr11	-	701428	703478		TCTGCACCCCTTGAATCTTGTACAAGAACATACCCTTGAACAAATTGTGTGGTTAAAAAA	natural antisense	NM_174940	TMEM80	transmembrane protein 80 isoform 1	+	695615	704129
ASHG19A3A044726	164.322	154.825	7.27825	7.35856	noncoding	AK095535		misc_RNA	2051	chr11	-	701428	703478		TCTGCACCCCTTGAATCTTGTACAAGAACATACCCTTGAACAAATTGTGTGGTTAAAAAA	natural antisense	NM_001042463	TMEM80	transmembrane protein 80 isoform 2	+	695615	704129
ASHG19A3A048566	342.293	422.529	8.32786	8.8162	noncoding	NR_033267	LOC100335030	RefSeq_NR	3162	chr12	+	49782956	49786114		GTTGTTGTTAAACAGAACCTTAACTTTATGTCTGAGGTATGTACTGCATGGGAACCTATT	intron sense-overlapping	NM_023071	SPATS2	spermatogenesis-associated serine-rich protein	+	49760687	49921207
ASHG19A3A038708	98.6987	113.547	6.55417	6.9062	noncoding	ENST00000452444	RP11-12A20.7	Ensembl	337	chr9	+	67793361	67793698	uc004aes.1,ENST00000444087,ENST00000441768,ENST00000419418,	CGCACAGGGCACATTCGGCCAAAGACACACACGCACACGGGCATACACACACAAACCCAC	intergenic
ASHG19A3A054788	1188.48	887.842	10.1321	9.87868	noncoding	AK125142		misc_RNA	2381	chr16	+	72823141	72825522		GTCAGAACTTGAGTAGCACTAAACATATACCTGTTGACTGACTGGCTCATATTGGGTGTT	intronic antisense	NM_006885	ZFHX3	zinc finger homeobox protein 3 isoform A	-	72816785	73082274
ASHG19A3A054788	1188.48	887.842	10.1321	9.87868	noncoding	AK125142		misc_RNA	2381	chr16	+	72823141	72825522		GTCAGAACTTGAGTAGCACTAAACATATACCTGTTGACTGACTGGCTCATATTGGGTGTT	intronic antisense	NM_001164766	ZFHX3	zinc finger homeobox protein 3 isoform B	-	72816785	73092534
ASHG19A3H0000090	98.908	84.3774	6.55676	6.47307	noncoding	nc-HOXB4-168-	nc-HOXB4-168	HOX cluster	1808	chr17	-	46657690	46659498	AK000839,	GTCTGAGATTACCTATTGGACCCTCTCTTGGCAAAGACAACCATAGTGTGATAGTTTGCT	intergenic
ASHG19A3A046467	6025.5	4910.73	12.4767	12.3411	noncoding	ENST00000427762	RP4-592A1.2	Ensembl	690	chr1	-	59096512	59097202	NM_013411,NM_001625,	ATCAGATGATAATGAAAAGGCCTTGAAAATCTGCCGGCAAGCCTACCACACTCAAACCAC	intergenic
ASHG19A3A007547	109.926	76.1088	6.70663	6.32953	noncoding	NR_027639	ADAM9	RefSeq_NR	3912	chr8	+	38854504	38962777		ACGAAGGCACAAAATGTGGTGCTGGAAAGAAATGAATACTGCATTGAGGGACGGACTTCT	exon sense-overlapping	NM_003816	ADAM9	disintegrin and metalloproteinase	+	38854504	38962779
ASHG19A3A007547	109.926	76.1088	6.70663	6.32953	noncoding	NR_027639	ADAM9	RefSeq_NR	3912	chr8	+	38854504	38962777		ACGAAGGCACAAAATGTGGTGCTGGAAAGAAATGAATACTGCATTGAGGGACGGACTTCT	bidirectional	NM_031940	TM2D2	TM2 domain-containing protein 2 isoform b	-	38846326	38854041
ASHG19A3A007547	109.926	76.1088	6.70663	6.32953	noncoding	NR_027639	ADAM9	RefSeq_NR	3912	chr8	+	38854504	38962777		ACGAAGGCACAAAATGTGGTGCTGGAAAGAAATGAATACTGCATTGAGGGACGGACTTCT	bidirectional	NM_001024380	TM2D2	TM2 domain-containing protein 2 isoform b	-	38846326	38854041
ASHG19A3A007547	109.926	76.1088	6.70663	6.32953	noncoding	NR_027639	ADAM9	RefSeq_NR	3912	chr8	+	38854504	38962777		ACGAAGGCACAAAATGTGGTGCTGGAAAGAAATGAATACTGCATTGAGGGACGGACTTCT	bidirectional	NM_001024381	TM2D2	TM2 domain-containing protein 2 isoform b	-	38846326	38854041
ASHG19A3A007547	109.926	76.1088	6.70663	6.32953	noncoding	NR_027639	ADAM9	RefSeq_NR	3912	chr8	+	38854504	38962777		ACGAAGGCACAAAATGTGGTGCTGGAAAGAAATGAATACTGCATTGAGGGACGGACTTCT	bidirectional	NM_078473	TM2D2	TM2 domain-containing protein 2 isoform a	-	38846326	38854041
ASHG19A3A000044	92.9368	90.085	6.4641	6.56268	noncoding	BC063868		RNAdb	2744	chr5	+	79776467	79779197		TGGATAAACCAAATAGACTTATATGTTTGTTAAAATATATGTAACTGCTGAAATAAAAAA	intergenic
CUST_52_PI426075208	283.715	284.131	8.06398	8.23674	noncoding	nc-HOXB4-174+	nc-HOXB4-174	HOX cluster	338	chr17	+	46666090	46666428		TGTCCCTTAATGAGAAAAAGGGAGTCTTATGACCCCATCCTTGTCCCAAAGATCAGAAGC	intergenic
ASHG19A3A051223	1795.4	2272.36	10.7246	11.2399	noncoding	uc001vvl.3	AK022914	UCSC_knowngene	2391	chr14	+	19650031	19692914	ENST00000447898,	GGATCCAGAGTTCAGCAGACCTTGAGACAATGAAAACAAACTTAGTAATAATCATTTTTC	intergenic
ASHG19A3A031214	170.802	183.247	7.33194	7.60158	noncoding	ENST00000435408	HCG9P5	Ensembl	225	chr6	+	29716065	29716290		AGAGAAGTCGCAGGAAGAATCCTCTGCCCGGAGCCTGCAGACTCCAACCCCTCAGCGTGA	intergenic
ASHG19A3A021440	135.972	283.085	7.00459	8.2321	noncoding	uc003ebh.1	BC016962	UCSC_knowngene	1794	chr3	-	114033681	114035475		GTGACAGTATCCTTACCTGCCATTTAATATTAGCCTCGTATTTTTCTCACGTATATTTAC	intergenic
ASHG19A3A017818	6481.16	6425.79	12.581	12.7262	noncoding	ENST00000497904	SUMO1P1	Ensembl	306	chr20	-	52491790	52492096	NR_002189,	ATGGAGGAAGAAGATGTGATTGAGGTTTATCAGGAACAAATCGGAGGTCATTCAACAGTT	intergenic
ASHG19A3A012034	21900.3	16281.4	14.3362	14.0583	noncoding	uc010xhe.1	DKFZp434J194	UCSC_knowngene	2188	chr19	+	3121806	3123994		CCGATGGAAGTCGACTTTTCATATCTTTCTCCTGAAATGAACTCTGTTTTAAATTGGAAT	intergenic
ASHG19A3A034710	194.694	180.741	7.52087	7.58127	noncoding	ENST00000435695	AC002454.1	Ensembl	432	chr7	+	92465796	92546501		ATTAAAACCCCTGAAAGCTGCCACACCGTGAAAACAAGGCCTCCTTCACATTAAAGGCAA	natural antisense	NM_001145306	CDK6	cyclin-dependent kinase 6	-	92234234	92465941
ASHG19A3A046299	733.21	812.263	9.42606	9.75558	noncoding	NR_026952	LOC729799	RefSeq_NR	2586	chr11	+	43918852	43921422		GAGAGCAAATAGCTCTCCAGATGGTAAACATAGTCATTTCATCCCAAAACTATCTTGGCA	intron sense-overlapping	NM_139178	ALKBH3	alpha-ketoglutarate-dependent dioxygenase alkB	+	43902356	43941825
ASHG19A3A024777	90205.4	108826	16.4827	16.72	noncoding	ENST00000321285	RP11-308D13.2	Ensembl	410	chr4	-	140619298	140619708	uc003nhn.2,NR_002315,NM_002107,ENST00000404612,ENST00000369387,	TGTAACAATTATGCCAAAAGACATCCAGCTAGCACACAGCATACGTGGAGAACGTGCTTA	intronic antisense	NM_001204368	MGST2	microsomal glutathione S-transferase 2 isoform	+	140586921	140625406
ASHG19A3A024777	90205.4	108826	16.4827	16.72	noncoding	ENST00000321285	RP11-308D13.2	Ensembl	410	chr4	-	140619298	140619708	uc003nhn.2,NR_002315,NM_002107,ENST00000404612,ENST00000369387,	TGTAACAATTATGCCAAAAGACATCCAGCTAGCACACAGCATACGTGGAGAACGTGCTTA	intronic antisense	NM_001204366	MGST2	microsomal glutathione S-transferase 2 isoform	+	140586921	140661899
ASHG19A3A024777	90205.4	108826	16.4827	16.72	noncoding	ENST00000321285	RP11-308D13.2	Ensembl	410	chr4	-	140619298	140619708	uc003nhn.2,NR_002315,NM_002107,ENST00000404612,ENST00000369387,	TGTAACAATTATGCCAAAAGACATCCAGCTAGCACACAGCATACGTGGAGAACGTGCTTA	intronic antisense	NM_001204367	MGST2	microsomal glutathione S-transferase 2 isoform	+	140586921	140661899
ASHG19A3A024777	90205.4	108826	16.4827	16.72	noncoding	ENST00000321285	RP11-308D13.2	Ensembl	410	chr4	-	140619298	140619708	uc003nhn.2,NR_002315,NM_002107,ENST00000404612,ENST00000369387,	TGTAACAATTATGCCAAAAGACATCCAGCTAGCACACAGCATACGTGGAGAACGTGCTTA	intronic antisense	NM_002413	MGST2	microsomal glutathione S-transferase 2 isoform	+	140586921	140625406
ASHG19A3A042488	363.357	344.9	8.41632	8.52073	noncoding	AK024109		NRED	2956	chr10	-	16733394	16736356		CATTTCCTCATGGAGCCTTGGATTACCTTTTATGCAGTTAAGTCAACATTAAAAAGTTTC	intron sense-overlapping	NM_152724	RSU1	ras suppressor protein 1 isoform 2	-	16632616	16859453
ASHG19A3A042488	363.357	344.9	8.41632	8.52073	noncoding	AK024109		NRED	2956	chr10	-	16733394	16736356		CATTTCCTCATGGAGCCTTGGATTACCTTTTATGCAGTTAAGTCAACATTAAAAAGTTTC	intron sense-overlapping	NM_012425	RSU1	ras suppressor protein 1 isoform 1	-	16632616	16859453
ASHG19A3A028125	81.8954	94.7875	6.27851	6.63917	noncoding	ENST00000503870	CTD-2130F23.2	Ensembl	546	chr5	+	37948592	37951157		CTTTTGTGGAGGACTGTCTTACTGTTCACAAATACTCCGCCTTTTCCATGAGAAGCTAAT	intergenic
ASHG19A3A019178	65.0865	68.5443	5.94671	6.17858	noncoding	AF003738		NRED	1402	chr21	+	35017933	35019291		CATAAAAATAAATACGGGTTTCTGTCACCTCGCTTCAGAATCAGACAGCTAGAGGTGGGG	intron sense-overlapping	NM_001001132	ITSN1	intersectin-1 isoform ITSN-s	+	35014783	35210802
ASHG19A3A019178	65.0865	68.5443	5.94671	6.17858	noncoding	AF003738		NRED	1402	chr21	+	35017933	35019291		CATAAAAATAAATACGGGTTTCTGTCACCTCGCTTCAGAATCAGACAGCTAGAGGTGGGG	intron sense-overlapping	NM_003024	ITSN1	intersectin-1 isoform ITSN-l	+	35014783	35261609
ASHG19A3A039193	97.9856	77.8151	6.54346	6.36177	noncoding	ENST00000433572	RP11-542K23.7	Ensembl	830	chr9	+	125165685	125211256		AAAGAGGGAAAATGAAATCCTGGCCCTATGGATACTGGGAAGCATACTCAAGTATCTCTG	intergenic
ASHG19A3A036717	1720.11	1421.64	10.6651	10.5615	noncoding	HIT000067254		H-invDB	619	chr8	+	81454720	81455338		CTGCCCTGAAAGGGGCTGAAATGAAGCCATTAAGACCGAAGTGTACTTTTTAAAACTCCA	intergenic
ASHG19A3A053602	68.0955	82.1104	6.01064	6.43517	noncoding	uc002dob.1	AK056728	UCSC_knowngene	2601	chr16	-	25151897	25160353		AAGAAAAATGGCCATGGGCAGAAGTGGATCTCCTAGTTTTAACACTATCTTACCGCCCGA	intronic antisense	NM_016309	LCMT1	leucine carboxyl methyltransferase 1 isoform a	+	25123046	25189551
ASHG19A3A053602	68.0955	82.1104	6.01064	6.43517	noncoding	uc002dob.1	AK056728	UCSC_knowngene	2601	chr16	-	25151897	25160353		AAGAAAAATGGCCATGGGCAGAAGTGGATCTCCTAGTTTTAACACTATCTTACCGCCCGA	intronic antisense	NM_001032391	LCMT1	leucine carboxyl methyltransferase 1 isoform b	+	25123046	25189551
ASHG19A3A039745	945.863	1002.6	9.79924	10.0533	noncoding	ENST00000436893	RP4-646N3.3	Ensembl	376	chrX	-	38660820	38663136		AGATAACCCTTCATCCCCCAGTTTCTTGACTCTGGCCGCTGTTCTTGAACATTTCTTAAA	intronic antisense	NM_001098790	MID1IP1	mid1-interacting protein 1	+	38660684	38665783
ASHG19A3A039745	945.863	1002.6	9.79924	10.0533	noncoding	ENST00000436893	RP4-646N3.3	Ensembl	376	chrX	-	38660820	38663136		AGATAACCCTTCATCCCCCAGTTTCTTGACTCTGGCCGCTGTTCTTGAACATTTCTTAAA	intronic antisense	NM_001098791	MID1IP1	mid1-interacting protein 1	+	38660684	38665783
ASHG19A3A039745	945.863	1002.6	9.79924	10.0533	noncoding	ENST00000436893	RP4-646N3.3	Ensembl	376	chrX	-	38660820	38663136		AGATAACCCTTCATCCCCCAGTTTCTTGACTCTGGCCGCTGTTCTTGAACATTTCTTAAA	natural antisense	NM_021242	MID1IP1	mid1-interacting protein 1	+	38663072	38665783
ASHG19A3A029544	7563.64	7260.11	12.8063	12.8993	noncoding	uc003nhn.2	CR593845	UCSC_knowngene	882	chr6	-	26321751	26322633		CCTCTCGCTCGCCGAGCTCCAGCCAAAGGAGAAGCGGGGTAAGTAAGGAGGTCTCTATAC	intergenic
ASHG19A3A032630	227.899	172.942	7.74752	7.5179	noncoding	ENST00000425261	AC006022.4	Ensembl	388	chr7	-	30782046	30782434		ATCAGCTGCTCTGAGACATGCTCCATCAACGACGGCATCTGCTTTGTGGCTGCCTGCAAG	intergenic
ASHG19A3L0000789	183.578	153.018	7.43781	7.34215	noncoding	chr14:94335247-94345947+	lincRNA-FAM181A	lincRNA	10701	chr14	+	94335247	94345947		TAAGACATATCCCATCTAGTTGCTTGTCCCTATTTCTGTGGTGAGGAAGGTCCTCTATGG	intergenic
ASHG19A3A024417	158.112	165.519	7.22431	7.45361	noncoding	ENST00000504520	RP11-163O17.1	Ensembl	2293	chr4	-	83814638	83822113		TTATTTGTCACGAAAGGCGGGCTTTAGAGGCGCGGGACTTCCACACTTCCTCTCCGAAGG	natural antisense	NM_024672	THAP9	THAP domain-containing protein 9	+	83821836	83841284
ASHG19A3A029646	140.999	129.837	7.05548	7.10431	noncoding	NR_001317	HCG4P6	RefSeq_NR	1060	chr6	-	29892368	29893428		CTGTCACTTCTAAATTGTGGCTCTAGCATTGTCCCATTACCTGCTACGTGACTGTTCTCT	intergenic
ASHG19A3A037263	133.731	117.237	6.98134	6.95365	noncoding	NR_023917	PTENP1	RefSeq_NR	3932	chr9	-	33673506	33677418	NM_000314,	TTTTCTAACTGTGCAGCCTCTTCCTCGGCTTCTCCTGAAAGGGAAGGTGGAAGCCGTGGG	intergenic
ASHG19A3L0002573	393.454	438.133	8.52943	8.8722	noncoding	DB299428	lincRNA-PAIP2B	lincRNA	543	chr2	-	71534130	71534673		TAAAATACCATTATAATGAGCAGCTGCTATTTTTGCCTTCCCAGCGTTCATCCCCTCTTC	intergenic
ASHG19A3L0001479	1679.48	2045.16	10.6315	11.0887	noncoding	chr4:25089927-25101952+	lincRNA-SEPSECS-1	lincRNA	12026	chr4	+	25089927	25101952		TTTACTCATGAAAAAGAAAACAGTGAAGGCCCCCTCCTCATGGCTTTCTTCCAACAAACT	intergenic
ASHG19A3A038369	748.025	983.499	9.45628	10.0253	noncoding	AK025180		NRED	1813	chr9	+	12798079	12799872		TCACTGTGGCTTGGAAATCATAACTTATGCATTTATCGACACAGTTTTCAATGCACATAT	intron sense-overlapping	NM_203403	C9orf150	hypothetical protein LOC286343	+	12775011	12823059
ASHG19A3A049556	1513.63	1316.18	10.4779	10.4492	noncoding	ENST00000451754	RP11-156K23.2	Ensembl	1977	chr13	-	49618214	49620930		TTGAAAAAATGGCCTGGCAACAAAAGCACTTTTCCTGACTTCTGCCTACCAGCTTTATGT	intronic antisense	NM_001079673	FNDC3A	fibronectin type-III domain-containing protein	+	49550047	49783915
ASHG19A3A025540	870.397	898.666	9.6739	9.89556	noncoding	ENST00000504250	RP11-345F18.1	Ensembl	554	chr4	+	56686168	56703548		TTTTACGCTTTCAATCTTGTGTGCTTGTCCCTATGTCCCTTGCCACTCTGAAGCTGTGTA	intergenic
ASHG19A3A041811	66756.9	70434.3	16.0154	16.1161	noncoding	ENST00000422633	EIF4A1P2	Ensembl	1220	chrY	-	5205785	5207005	NM_001416,ENST00000428832,	ATTGAGATCTTCTACAACACCTCCATTGAGGAAATGCCCCCAATGTTGCTGACCTCATCT	intronic antisense	NM_032973	PCDH11Y	protocadherin-11 Y-linked isoform c	+	4924130	5610264
ASHG19A3A054203	185.219	164.919	7.44996	7.44859	noncoding	NR_015441	LOC652276	RefSeq_NR	2714	chr16	+	2653384	2680495		GGAAGCCATCTCTGCACAAAAGAAGTCAACGCAGGAATAAATTCCAAGATACTGAACTAC	intergenic
ASHG19A3A025296	113.791	121.095	6.75422	7.00283	noncoding	uc003gmr.2	BC042433	UCSC_knowngene	607	chr4	+	12225105	12252907		AATCACAGAGAAGTTGTCAGAAAGATTTTAGCCTCCGCTATAGGAAGTCCTGCCCACCTT	intergenic
ASHG19A3L0000634	1084.67	879.98	9.99809	9.86533	noncoding	CR590107	lincRNA-NUDT15-2	lincRNA	950	chr13	-	48627461	48669198	NM_014166,	GTCCTGTCTAGGGAACTTATAGAAATGCTGGCAATTTCAAGAAACCAAAAGTTGTTACAG	exon sense-overlapping	NM_014166	MED4	mediator of RNA polymerase II transcription	-	48650091	48669240
ASHG19A3A049822	170.146	138.916	7.32569	7.20063	noncoding	ENST00000328558	RP11-282A11.1	Ensembl	471	chr13	-	107516163	107516634		TTTTACCTGCACTGCTAAGACCGAGTGGTTCGGCAAGGTGAAAGAACGCATGATTATTGT	intergenic
ASHG19A3A013289	134.241	165.629	6.98613	7.45458	noncoding	ENST00000417697	AC062028.1	Ensembl	2204	chr2	-	11239125	11272347		AGAATTTCTCCTGAGTTTCAGACAAGAGCCTTTCCAGATTCTTCCTTGAAGCCCTACTGG	bidirectional	NM_182500	C2orf50	hypothetical protein LOC130813	+	11273178	11286916
ASHG19A3L0000026	58.5504	67.2088	5.78787	6.14929	noncoding	chr1:157374626-157390451-	lincRNA-ETV3-1	lincRNA	15826	chr1	-	157374626	157390451		TTAAATAGTGTGTATCCTCCAGACAGTCATCTGTGTACCCACAAATACCACAGACCCTGT	intergenic
ASHG19A3A012439	60090.8	57007.8	15.851	15.8196	noncoding	ENST00000497576	CTC-260E6.2	Ensembl	441	chr19	+	20235852	20236293	NM_001020,ENST00000321418,	AATATGTGGATGAGGCTTCCAAGAAGGAGATCAAAGACATCCTCATCCAGTATGACCGGA	intergenic
ASHG19A3A025564	185.705	216.409	7.454	7.84254	noncoding	ENST00000508135	RP11-4O3.2	Ensembl	2677	chr4	+	58586200	58590821		ATTATTCTTCGGACTTGGACTCCGCTTTGGATTGCCTTCTTTCAGCTTTGCTGCTTTGCT	intergenic
ASHG19A3A018569	116.434	73.7858	6.78676	6.283	noncoding	AY927573		RNAdb	1365	chr20	+	61910286	61919935	NM_018209,	TTTGAAGAGAGTGACTGGAGTGGTAAAGATGGAAATGCTGGAAATGATACTGGCGCTCAC	exon sense-overlapping	NM_175609	ARFGAP1	ADP-ribosylation factor GTPase-activating	+	61904164	61921142
ASHG19A3A018569	116.434	73.7858	6.78676	6.283	noncoding	AY927573		RNAdb	1365	chr20	+	61910286	61919935	NM_018209,	TTTGAAGAGAGTGACTGGAGTGGTAAAGATGGAAATGCTGGAAATGATACTGGCGCTCAC	exon sense-overlapping	NM_018209	ARFGAP1	ADP-ribosylation factor GTPase-activating	+	61904164	61921142
ASHG19A3A037068	359.035	207.725	8.39862	7.78424	noncoding	ENST00000411761	RP11-255J3.2	Ensembl	979	chr9	-	2875448	2876427	NM_004489,	TTCCTGCAGCTCAAGGAAGTTTTACATGAGGAAGAAAAACGGAGGCGAAAGGAACAGAGT	intergenic
ASHG19A3A048438	2088.83	1458.99	10.9355	10.5983	noncoding	AK095813		NRED	1739	chr12	+	21622436	21624180	NM_024854,	AAACTGACTTTTCTCATGTTCAACTGGACCTAGGGGAATATGACAGAAAAGCATCCCATA	natural antisense	NM_002907	RECQL	ATP-dependent DNA helicase Q1	-	21621843	21654603
ASHG19A3A048438	2088.83	1458.99	10.9355	10.5983	noncoding	AK095813		NRED	1739	chr12	+	21622436	21624180	NM_024854,	AAACTGACTTTTCTCATGTTCAACTGGACCTAGGGGAATATGACAGAAAAGCATCCCATA	exon sense-overlapping	NM_024854	PYROXD1	pyridine nucleotide-disulfide oxidoreductase	+	21590537	21624182
ASHG19A3A048438	2088.83	1458.99	10.9355	10.5983	noncoding	AK095813		NRED	1739	chr12	+	21622436	21624180	NM_024854,	AAACTGACTTTTCTCATGTTCAACTGGACCTAGGGGAATATGACAGAAAAGCATCCCATA	natural antisense	NM_032941	RECQL	ATP-dependent DNA helicase Q1	-	21621843	21654603
ASHG19A3A022337	798.331	679.517	9.55403	9.4952	noncoding	ENST00000421404	AC105765.1	Ensembl	1227	chr3	+	18580164	18581391		CAGCAACAACTACAGCAAGTTCTGGAACATCCCCTTGAATTTTTATGGAATCAGCCTCAG	intergenic
ASHG19A3A000261	208.089	484.649	7.61746	9.01787	noncoding	ENST00000441071	RP5-1073O3.7	Ensembl	571	chr1	-	114466621	114471940		TCTGGGTAGAACAGATCCTGCTCAGAATGTATAAACCAGGAAAAGTTGTTCTGGCCCCTC	bidirectional	NM_198268	HIPK1	homeodomain-interacting protein kinase 1 isoform	+	114471995	114520491
ASHG19A3A000261	208.089	484.649	7.61746	9.01787	noncoding	ENST00000441071	RP5-1073O3.7	Ensembl	571	chr1	-	114466621	114471940		TCTGGGTAGAACAGATCCTGCTCAGAATGTATAAACCAGGAAAAGTTGTTCTGGCCCCTC	bidirectional	NM_152696	HIPK1	homeodomain-interacting protein kinase 1 isoform	+	114471995	114514698
ASHG19A3A016166	1396.97	1713.97	10.36	10.8319	noncoding	ENST00000436665	AC013268.5	Ensembl	2145	chr2	+	110744639	110753809	uc002tfs.3,NR_027244,ENST00000448359,	GATCTGGAGTGGAAGGGGAATTCATTTGTTCATTGTCTATCCTTTTGTATTGATTGAATT	intergenic
ASHG19A3A052416	91.1146	66.3506	6.4342	6.13131	noncoding	AK127738		misc_RNA	2366	chr15	-	76467231	76473827		AGAGGGAATCTGTCTTTATTTATTGGCTCTTTCCTGTGCAGAATGCAAGGGAGTCTCCCT	natural antisense	NM_152335	C15orf27	transmembrane protein C15orf27	+	76352298	76497304
ASHG19A3A036302	1552.86	1405.25	10.514	10.5414	noncoding	ENST00000438784	AF228730.4	Ensembl	848	chr8	+	6980378	6981226		CCAGTCCAAGAATCTGTTTTAAGTTCAGACTTAAAACAGTGGCAAATAAGAAGTCCTATT	intergenic
ASHG19A3A000243	90.8801	74.0971	6.43062	6.28925	noncoding	ENST00000437730	RP5-995J12.2	Ensembl	1563	chr20	+	42839631	42854667		TCACCACACCCTTTCAGGTAGCGAGATGAGCCCCAGAGAGGCGAAGCCACTTGAGCTCGT	bidirectional	NM_016470	C20orf111	oxidative stress responsive 1	-	42825135	42839431
ASHG19A3A019834	117.391	161.763	6.79842	7.42189	noncoding	AB051446		NRED	6855	chr22	-	40876291	40883142		TTTTTAATCACCTTTCTATTCCCTACTGCTTCCCATAGAAAAGGGCCAGGTGTAGTGCCT	intron sense-overlapping	NM_020831	MKL1	MKL/myocardin-like protein 1	-	40806291	41032690
ASHG19A3A055149	79.3435	69.1469	6.23085	6.19201	noncoding	uc002nra.2	BC037873	UCSC_knowngene	1836	chr19	-	23237626	23244067		TACAGGCGTAAGCCATCGCACCTGGCCAGGGGGTACTTTCTGCCCACAAATGAGATTGTG	intergenic
ASHG19A3A037568	63956.9	64331.8	15.9452	15.9891	noncoding	ENST00000418852	RP11-61E5.1	Ensembl	494	chr9	-	74722734	74723228	NM_001207,NM_001037637,	TTTACAAACCAAGGAACAGTGATCCACTTTAACCACCCTAAGGTTCAGGCATCTCTGGCA	intergenic
ASHG19A3L0001452	428.108	442.866	8.64908	8.88854	noncoding	BG677629	lincRNA-ARSJ-2	lincRNA	928	chr4	-	115399874	115400748		AATATTTAGCCCGTGTGCTTCTCCCGAAAGCCCCATTTGGCTTTCCCTTCTTATCTAATT	intergenic
ASHG19A3A040134	60960.3	67564.1	15.8748	16.0541	noncoding	ENST00000399569	RP1-321O10.2	Ensembl	1089	chrX	-	85415234	85416363		TTCTCAGACTATCCTCCTCTGGGTCACTTTGGTGTTTGTGATATGAGACAGACAGTTGCT	intronic antisense	NM_053281	DACH2	dachshund homolog 2 isoform a	+	85403454	86087605
ASHG19A3A040134	60960.3	67564.1	15.8748	16.0541	noncoding	ENST00000399569	RP1-321O10.2	Ensembl	1089	chrX	-	85415234	85416363		TTCTCAGACTATCCTCCTCTGGGTCACTTTGGTGTTTGTGATATGAGACAGACAGTTGCT	intronic antisense	NM_001139514	DACH2	dachshund homolog 2 isoform b	+	85403454	86087605
ASHG19A3A012869	501.478	433.283	8.87328	8.85568	noncoding	ENST00000447440	AC009002.1	Ensembl	1688	chr19	+	49255749	49257442		TAATTAAAGCATTTTCTCTGGTCCAAGGCCCACCTCCAGCATCGCCAACCCCGAGCAGGG	natural antisense	NM_000148	FUT1	galactoside 2-alpha-L-fucosyltransferase 1	-	49251267	49258647
ASHG19A3A038000	112.132	98.7068	6.73493	6.69769	noncoding	NR_027125	RBM18	RefSeq_NR	3203	chr9	-	125001833	125027143		ACTTATACAAAATCAGTGACCAGCTGTGGCATTAATGGAAGAGGGGCCAGAATGCATCTC	natural antisense	NM_001173512	MRRF	"ribosome-recycling factor, mitochondrial isoform"	+	125026881	125085742
ASHG19A3A038000	112.132	98.7068	6.73493	6.69769	noncoding	NR_027125	RBM18	RefSeq_NR	3203	chr9	-	125001833	125027143		ACTTATACAAAATCAGTGACCAGCTGTGGCATTAATGGAAGAGGGGCCAGAATGCATCTC	natural antisense	NM_138777	MRRF	"ribosome-recycling factor, mitochondrial isoform"	+	125026881	125085742
ASHG19A3A038000	112.132	98.7068	6.73493	6.69769	noncoding	NR_027125	RBM18	RefSeq_NR	3203	chr9	-	125001833	125027143		ACTTATACAAAATCAGTGACCAGCTGTGGCATTAATGGAAGAGGGGCCAGAATGCATCTC	exon sense-overlapping	NM_033117	RBM18	probable RNA-binding protein 18	-	125001833	125027143
ASHG19A3A013317	432.918	367.968	8.6661	8.61977	noncoding	ENST00000444710	AC008069.2	Ensembl	950	chr2	-	17035086	17036551		TCAGCAAGATCTGGGAGGAGTACCCAGACAAATCATGAACACATTCAGCATTCTTCCCTA	intergenic
ASHG19A3A034250	103.174	80.7427	6.61638	6.41201	noncoding	ENST00000436045	FMO7P	Ensembl	768	chr1	+	166443981	166450802		AAAGATGTGCAGTATGAGGAAGCATCCTGGTTTCTCTTGCACTGGCCAATGGAACATTGT	intergenic
ASHG19A3A033806	31549.8	3638.7	14.8914	11.9077	noncoding	AY927455		RNAdb	678	chr7	-	155592733	155601766		CCAGCCTCCCTCATGACTAAATGCATATCTATTCCTGTCAAAACGTGTATCACAATGTAC	exon sense-overlapping	NM_000193	SHH	sonic hedgehog protein preproprotein	-	155595557	155604967
ASHG19A3A021683	33735	34274.2	14.9878	15.1116	noncoding	ENST00000510488	RP11-438D8.3	Ensembl	1269	chr3	-	141189475	141190744		AAGGAGCTGCTCTTTATGAAGAAGAACCACAAAGAGGAAGTAAAAGGCCTACAAGCCCAG	intergenic
ASHG19A3A007852	2832.42	1546.13	11.3791	10.6744	noncoding	ENST00000415124	AC113189.5	Ensembl	352	chr17	-	7485281	7487390		AATCCTGGCAGGACAAGGAAAACCCCGTCAAAGATTTGCATAAATTTTGCTGCTCTCCTG	natural antisense	NM_001040059	CD68	macrosialin isoform B	+	7482805	7485429
ASHG19A3A007852	2832.42	1546.13	11.3791	10.6744	noncoding	ENST00000415124	AC113189.5	Ensembl	352	chr17	-	7485281	7487390		AATCCTGGCAGGACAAGGAAAACCCCGTCAAAGATTTGCATAAATTTTGCTGCTCTCCTG	natural antisense	NM_001251	CD68	macrosialin isoform A	+	7482804	7485429
ASHG19A3A007852	2832.42	1546.13	11.3791	10.6744	noncoding	ENST00000415124	AC113189.5	Ensembl	352	chr17	-	7485281	7487390		AATCCTGGCAGGACAAGGAAAACCCCGTCAAAGATTTGCATAAATTTTGCTGCTCTCCTG	natural antisense	NM_004870	MPDU1	mannose-P-dolichol utilization defect 1 protein	+	7486964	7491527
ASHG19A3A009149	42136.3	46819.7	15.3165	15.5519	noncoding	ENST00000452091	AC005517.3	Ensembl	489	chr17	+	15410179	15410668		TACAAACGGTTCCTAATTTTTCATCTGCACTGCCAAGACAGCGTGGTTGAATGGGAAGCA	intronic antisense	NM_145301	FAM18B2	hypothetical protein LOC201158 isoform 1	-	15405577	15466945
ASHG19A3A009149	42136.3	46819.7	15.3165	15.5519	noncoding	ENST00000452091	AC005517.3	Ensembl	489	chr17	+	15410179	15410668		TACAAACGGTTCCTAATTTTTCATCTGCACTGCCAAGACAGCGTGGTTGAATGGGAAGCA	intronic antisense	NM_001204478	FAM18B2-CDRT4	hypothetical protein LOC100533496	-	15339331	15466945
ASHG19A3A015714	129.14	139.927	6.93386	7.21029	noncoding	ENST00000416845	AC093159.1	Ensembl	424	chr2	+	62690261	62691205		ACAAGAGGTGCCATGAGACAGTATATAGTTCATTTCCCCACCGCAAGAGTAAAGGGCTTA	intergenic
CUST_903_PI426073487	410.601	406.974	8.5869	8.76335	noncoding	uc.424-	uc.424	UCR	215	chr18	-	22767778	22767993		TTATTTATTTATTCCTGACACATATCCCCCTGTTACTAGTCTCAGGAGACCCTGTAGATG	intron sense-overlapping	NM_015461	ZNF521	zinc finger protein 521	-	22641887	22932214
ASHG19A3A028025	2818.93	3427.79	11.3716	11.8199	noncoding	NR_027028	GUSBP1	RefSeq_NR	703	chr5	+	21459588	21497305	uc011cnn.1,uc010iyn.2,uc003jxm.2,uc003jxm.2,NR_029426,NR_027386,NR_024054,NR_003660,NR_003504,ENST00000513408,ENST00000512685,ENST00000423899,ENST00000380734,ENST00000355132,	ACATCACAATCCCATTATTCAGAGCGTGTATGGAGTGGAAACGCTTGTAGGGTTTCACCA	intergenic
ASHG19A3A024171	10011.2	10185.1	13.2191	13.3868	noncoding	ENST00000473096	RP11-61F5.1	Ensembl	294	chr4	-	52844244	52844538		TAACACCACTTCCACCATCACAGTAAAGTTGCCATCAGAAGACTGAAGGAGTTGGAAGAC	intergenic
ASHG19A3L0002160	58.3367	71.3801	5.78236	6.23611	noncoding	EB387271	lincRNA-TMEM64-1	lincRNA	847	chr8	+	91317897	91318744		CTTTCCCAAGTCTTCTCCATGTAATGTAAATTGCATTCCACTGAATTTAGCCTAAAAAAC	intergenic
ASHG19A3A033387	1976.81	1905.9	10.8579	10.9898	noncoding	ENST00000413533	AC079621.4	Ensembl	2027	chr7	-	112375220	112378748		AAGAAGCCCATGCTCATGGTTGAAGGTGTGCTTCAAAAGTGCCCTTCTATTGATTACTTT	intergenic
ASHG19A3A039481	59.8639	65.8612	5.82112	6.12169	noncoding	ENST00000456356	RP11-229P13.23	Ensembl	748	chr9	+	139957986	139959033		TGGAAATCCTGAGTCGGGGGAACAGGCTTTGCCTATGACGTGCCTGGGAGCTGTCTGGGG	natural antisense	NM_178448	C9orf140	protein C9orf140	-	139956578	139965028
ASHG19A3A029261	67.7369	84.4707	6.0026	6.47562	noncoding	G43520		misc_RNA	134	chr5	+	179046234	179046368	uc.186+,	TTGTGTTTCTTTAGAGCCTTTTCAGCTATTTCCTGTGAAGCAAACTGCACGAAGGCCTCC	natural antisense	NM_005520	HNRNPH1	heterogeneous nuclear ribonucleoprotein H	-	179041178	179050722
ASHG19A3A042216	2510.52	1652.67	11.2025	10.7781	noncoding	ENST00000457266	AC019099.1	Ensembl	1671	chrY	+	28621042	28725849	uc001upm.2,NR_002815,ENST00000445572,	ATTTATCCACCAGAATTTGCCGTGGAGATACTTTTTGGCAAGAAATGACTTCCAATGACA	intergenic
ASHG19A3A053539	89.0731	86.5747	6.40027	6.50775	noncoding	G36733		misc_RNA	341	chr16	-	19130702	19131043		GATAAAGATGACTTCAAATATCACGCCCCCAAGTATATATAACACTACCATATCCAAAAC	natural antisense	NM_001034841	ITPRIPL2	"inositol 1,4,5-triphosphate receptor-interacting"	+	19125253	19132952
ASHG19A3A039550	1608.59	1739.16	10.5639	10.8559	noncoding	ENST00000381106	RP11-706O15.5	Ensembl	2155	chrX	-	3820865	3838787	uc011mhk.1,	GGGCGCCCGAGCTCTGCCCCAGCCCCGAGTCGCGGTCGCCGGAGCCGCCTGCCAACCGCC	intergenic
ASHG19A3A023181	192.052	163.172	7.50138	7.4326	noncoding	ENST00000433902	RP13-685P2.5	Ensembl	486	chr3	+	129034362	129043390		GGTGCCCTTCACCTGCAGAAGCGTGTCGTTCTGCACCAGCGCCTTGATCGAGTACTTGAG	natural antisense	NM_006026	H1FX	histone H1x	-	129033613	129035120
ASHG19A3A013359	91.3868	84.782	6.439	6.4802	noncoding	uc002ree.1	AK090620	UCSC_knowngene	2098	chr2	-	21910305	21933495		AAACCACATCTGATGTCATTCCAATCACTGTGTGTGTCTGCACTTGTGGGTTGTCTGCAT	intergenic
ASHG19A3A044191	143.145	141.909	7.07578	7.22846	noncoding	ENST00000416657	RP11-36D19.8	Ensembl	339	chr10	+	82093526	82094182		GATGTCATCCAGCAACAGAAAGCTTGTCAAAATAGGAACCATTTCCATCCCTACCACTGG	intergenic
ASHG19A3A029712	182.179	362.147	7.42473	8.59619	noncoding	ENST00000419679	XXbac-BPG32J3.18	Ensembl	461	chr6	-	31732086	31733365		TTTAGCTGTTGAGTTAAGAAACAGAAAAAGGAGCCTGGGGCTTCTGACTCTTTCACCAGG	natural antisense	NM_001039651	C6orf26	protein G7d	+	31730772	31732624
ASHG19A3L0002508	92.7362	196.717	6.46118	7.70281	noncoding	CN413083	lincRNA-UFC1	lincRNA	687	chr1	+	161106389	161107075		TTTTGTAAAACCTCCCAGGATGATAGTAAGAGTTGGCACAAAAAGAGGTTAATAGGTGCT	intergenic
ASHG19A3A033499	3255.04	2157.68	11.5876	11.1664	noncoding	uc003vmn.2	MGC27345	UCSC_knowngene	2120	chr7	-	127944239	127946359		GAGTGACTGCTTTGTTGAATCAGATAGTAACAAACATTTATTTGTAGTCTGGTTGTGTCA	intergenic
ASHG19A3L0000387	256.891	215.005	7.92277	7.83317	noncoding	chr11:44720724-44741649+	lincRNA-TSPAN18	lincRNA	20926	chr11	+	44720724	44741649		GTTTGCCTTCCCATTTCTTTTCTTTTCATCCAAGTGCAGAGTAGTGGATGGACATAGGGG	intergenic
ASHG19A3A033293	1075.65	872.979	9.98628	9.85547	noncoding	ENST00000433904	CTA-313A17.2	Ensembl	331	chr7	-	101967673	101969945	NM_175047,NM_018991,NM_013440,NM_012447,NM_001013739,NM_001002840,ENST00000426478,	CAGTCAGAGCCACCAGCCAATGATCTTTTCAATGCGGTGAAAGCTGCCAAAAGTGACATG	intergenic
ASHG19A3A049929	79.3536	76.594	6.23098	6.34078	noncoding	CR597960		misc_RNA	2029	chr13	+	22032723	22034751		AGACGTCACCCTTTGCTGTGTCAGAGAAATGTAGTAAAAGCGAGTAAGTATTTAATCACT	natural antisense	NM_153251	ZDHHC20	probable palmitoyltransferase ZDHHC20	-	21946709	22033508
ASHG19A3A043041	522.209	547.612	8.93373	9.19413	noncoding	ENST00000435808	RP11-20E23.2	Ensembl	1778	chr10	-	82535920	82537844		AAAGGGGGATATGTGATCAAATCATCAAAAGGAACCGCTTTCTTCCCTGGGCAATGCACA	intergenic
ASHG19A3A013540	57261.5	76513.6	15.7859	16.2253	noncoding	ENST00000414823	AC009413.2	Ensembl	399	chr2	-	42077342	42077741		TATGGCACGGAGTCCCAGGCCAAGGATGTCATTGAAGAGTACTTCAAATGCAAGAAATGA	intergenic
ASHG19A3L0000086	27518.5	29871.7	14.6802	14.9237	noncoding	BI048312	lincRNA-WNT9A	lincRNA	393	chr1	+	227598421	228286740	NM_001658,NM_001024228,NM_001024227,NM_001024226,	CGAAAAAGACAACCTCTACTTTTTTCTTTAGTATTTGGATAAACACTGAAGCTGGAGCTG	exon sense-overlapping	NM_001024226	ARF1	ADP-ribosylation factor 1	+	228270360	228286913
ASHG19A3L0000086	27518.5	29871.7	14.6802	14.9237	noncoding	BI048312	lincRNA-WNT9A	lincRNA	393	chr1	+	227598421	228286740	NM_001658,NM_001024228,NM_001024227,NM_001024226,	CGAAAAAGACAACCTCTACTTTTTTCTTTAGTATTTGGATAAACACTGAAGCTGGAGCTG	intronic antisense	NM_003395	WNT9A	protein Wnt-9a precursor	-	228109164	228135676
ASHG19A3L0000086	27518.5	29871.7	14.6802	14.9237	noncoding	BI048312	lincRNA-WNT9A	lincRNA	393	chr1	+	227598421	228286740	NM_001658,NM_001024228,NM_001024227,NM_001024226,	CGAAAAAGACAACCTCTACTTTTTTCTTTAGTATTTGGATAAACACTGAAGCTGGAGCTG	intronic antisense	NM_001161465	JMJD4	jmjC domain-containing protein 4 isoform 2	-	227918889	227923112
ASHG19A3L0000086	27518.5	29871.7	14.6802	14.9237	noncoding	BI048312	lincRNA-WNT9A	lincRNA	393	chr1	+	227598421	228286740	NM_001658,NM_001024228,NM_001024227,NM_001024226,	CGAAAAAGACAACCTCTACTTTTTTCTTTAGTATTTGGATAAACACTGAAGCTGGAGCTG	exon sense-overlapping	NM_001024227	ARF1	ADP-ribosylation factor 1	+	228270850	228286913
ASHG19A3L0000086	27518.5	29871.7	14.6802	14.9237	noncoding	BI048312	lincRNA-WNT9A	lincRNA	393	chr1	+	227598421	228286740	NM_001658,NM_001024228,NM_001024227,NM_001024226,	CGAAAAAGACAACCTCTACTTTTTTCTTTAGTATTTGGATAAACACTGAAGCTGGAGCTG	exon sense-overlapping	NM_001024228	ARF1	ADP-ribosylation factor 1	+	228270850	228286913
ASHG19A3L0000086	27518.5	29871.7	14.6802	14.9237	noncoding	BI048312	lincRNA-WNT9A	lincRNA	393	chr1	+	227598421	228286740	NM_001658,NM_001024228,NM_001024227,NM_001024226,	CGAAAAAGACAACCTCTACTTTTTTCTTTAGTATTTGGATAAACACTGAAGCTGGAGCTG	intronic antisense	NM_023007	JMJD4	jmjC domain-containing protein 4 isoform 1	-	227918889	227923112
ASHG19A3L0000086	27518.5	29871.7	14.6802	14.9237	noncoding	BI048312	lincRNA-WNT9A	lincRNA	393	chr1	+	227598421	228286740	NM_001658,NM_001024228,NM_001024227,NM_001024226,	CGAAAAAGACAACCTCTACTTTTTTCTTTAGTATTTGGATAAACACTGAAGCTGGAGCTG	intron sense-overlapping	NM_053052	SNAP47	synaptosomal-associated protein 47	+	227922696	227968932
ASHG19A3L0000086	27518.5	29871.7	14.6802	14.9237	noncoding	BI048312	lincRNA-WNT9A	lincRNA	393	chr1	+	227598421	228286740	NM_001658,NM_001024228,NM_001024227,NM_001024226,	CGAAAAAGACAACCTCTACTTTTTTCTTTAGTATTTGGATAAACACTGAAGCTGGAGCTG	exon sense-overlapping	NM_001658	ARF1	ADP-ribosylation factor 1	+	228270360	228286913
ASHG19A3L0000086	27518.5	29871.7	14.6802	14.9237	noncoding	BI048312	lincRNA-WNT9A	lincRNA	393	chr1	+	227598421	228286740	NM_001658,NM_001024228,NM_001024227,NM_001024226,	CGAAAAAGACAACCTCTACTTTTTTCTTTAGTATTTGGATAAACACTGAAGCTGGAGCTG	intron sense-overlapping	NM_033131	WNT3A	protein Wnt-3a precursor	+	228194722	228248972
ASHG19A3L0000086	27518.5	29871.7	14.6802	14.9237	noncoding	BI048312	lincRNA-WNT9A	lincRNA	393	chr1	+	227598421	228286740	NM_001658,NM_001024228,NM_001024227,NM_001024226,	CGAAAAAGACAACCTCTACTTTTTTCTTTAGTATTTGGATAAACACTGAAGCTGGAGCTG	intron sense-overlapping	NM_183062	PRSS38	serine protease 38 precursor	+	228003417	228034171
ASHG19A3L0000086	27518.5	29871.7	14.6802	14.9237	noncoding	BI048312	lincRNA-WNT9A	lincRNA	393	chr1	+	227598421	228286740	NM_001658,NM_001024228,NM_001024227,NM_001024226,	CGAAAAAGACAACCTCTACTTTTTTCTTTAGTATTTGGATAAACACTGAAGCTGGAGCTG	intron sense-overlapping	NM_178549	ZNF678	zinc finger protein 678	+	227751219	227850164
ASHG19A3A014812	110.469	83.7361	6.71308	6.46168	noncoding	G43510		misc_RNA	150	chr1	-	16838393	16838543		CTAACCAGCTGAAAAATTCAAATACATGCCCTTTAAGGATTAAGTTTAAACCACACTACC	intergenic
ASHG19A3A007628	452.989	471.558	8.73146	8.9741	noncoding	NR_028100	DCAF11	RefSeq_NR	3838	chr14	+	24584491	24594450		AGGTACTGGCCTATCTCCTCCGCAGGCCCTCTTGGACTCAGAGGAAGAGAATGACAGAGC	exon sense-overlapping	NM_025230	DCAF11	DDB1- and CUL4-associated factor 11 isoform 1	+	24583985	24594451
ASHG19A3A007628	452.989	471.558	8.73146	8.9741	noncoding	NR_028100	DCAF11	RefSeq_NR	3838	chr14	+	24584491	24594450		AGGTACTGGCCTATCTCCTCCGCAGGCCCTCTTGGACTCAGAGGAAGAGAATGACAGAGC	exon sense-overlapping	NM_181357	DCAF11	DDB1- and CUL4-associated factor 11 isoform 2	+	24584493	24594451
ASHG19A3A007628	452.989	471.558	8.73146	8.9741	noncoding	NR_028100	DCAF11	RefSeq_NR	3838	chr14	+	24584491	24594450		AGGTACTGGCCTATCTCCTCCGCAGGCCCTCTTGGACTCAGAGGAAGAGAATGACAGAGC	exon sense-overlapping	NM_001163484	DCAF11	DDB1- and CUL4-associated factor 11 isoform 1	+	24583905	24594451
ASHG19A3A053693	97.0868	88.0413	6.53005	6.53101	noncoding	ENST00000449345	RP11-85G21.1	Ensembl	399	chr1	-	157202020	157206926		GCTAATTTAGAAGTTCTAAGGTATTCTCCACCTGTAATCTATTGCTCCAGAATTCTGCAG	intergenic
ASHG19A3A043149	188.797	185.387	7.47641	7.61801	noncoding	ENST00000451364	RP11-429G19.2	Ensembl	716	chr10	-	97621069	97849912		TTATAATCGGAGTGGATTCCATACCTCTCATCCCTGGATTTTCATCTTGTGGCACTGGAT	intronic antisense	NM_001001732	CC2D2B	protein CC2D2B isoform 2	+	97759847	97792441
ASHG19A3A043149	188.797	185.387	7.47641	7.61801	noncoding	ENST00000451364	RP11-429G19.2	Ensembl	716	chr10	-	97621069	97849912		TTATAATCGGAGTGGATTCCATACCTCTCATCCCTGGATTTTCATCTTGTGGCACTGGAT	intronic antisense	NM_001134375	CCNJ	cyclin-J isoform 1	+	97803158	97820625
ASHG19A3A043149	188.797	185.387	7.47641	7.61801	noncoding	ENST00000451364	RP11-429G19.2	Ensembl	716	chr10	-	97621069	97849912		TTATAATCGGAGTGGATTCCATACCTCTCATCCCTGGATTTTCATCTTGTGGCACTGGAT	natural antisense	NM_001164178	ENTPD1	ectonucleoside triphosphate diphosphohydrolase 1	+	97515408	97637023
ASHG19A3A043149	188.797	185.387	7.47641	7.61801	noncoding	ENST00000451364	RP11-429G19.2	Ensembl	716	chr10	-	97621069	97849912		TTATAATCGGAGTGGATTCCATACCTCTCATCCCTGGATTTTCATCTTGTGGCACTGGAT	natural antisense	NM_001164183	ENTPD1	ectonucleoside triphosphate diphosphohydrolase 1	+	97515672	97637023
ASHG19A3A043149	188.797	185.387	7.47641	7.61801	noncoding	ENST00000451364	RP11-429G19.2	Ensembl	716	chr10	-	97621069	97849912		TTATAATCGGAGTGGATTCCATACCTCTCATCCCTGGATTTTCATCTTGTGGCACTGGAT	natural antisense	NM_001098175	ENTPD1	ectonucleoside triphosphate diphosphohydrolase 1	+	97471535	97637023
ASHG19A3A043149	188.797	185.387	7.47641	7.61801	noncoding	ENST00000451364	RP11-429G19.2	Ensembl	716	chr10	-	97621069	97849912		TTATAATCGGAGTGGATTCCATACCTCTCATCCCTGGATTTTCATCTTGTGGCACTGGAT	natural antisense	NM_001164181	ENTPD1	ectonucleoside triphosphate diphosphohydrolase 1	+	97515408	97637023
ASHG19A3A043149	188.797	185.387	7.47641	7.61801	noncoding	ENST00000451364	RP11-429G19.2	Ensembl	716	chr10	-	97621069	97849912		TTATAATCGGAGTGGATTCCATACCTCTCATCCCTGGATTTTCATCTTGTGGCACTGGAT	intronic antisense	NM_001134376	CCNJ	cyclin-J isoform 3	+	97803158	97820625
ASHG19A3A043149	188.797	185.387	7.47641	7.61801	noncoding	ENST00000451364	RP11-429G19.2	Ensembl	716	chr10	-	97621069	97849912		TTATAATCGGAGTGGATTCCATACCTCTCATCCCTGGATTTTCATCTTGTGGCACTGGAT	natural antisense	NM_001164179	ENTPD1	ectonucleoside triphosphate diphosphohydrolase 1	+	97515672	97637023
ASHG19A3A043149	188.797	185.387	7.47641	7.61801	noncoding	ENST00000451364	RP11-429G19.2	Ensembl	716	chr10	-	97621069	97849912		TTATAATCGGAGTGGATTCCATACCTCTCATCCCTGGATTTTCATCTTGTGGCACTGGAT	intronic antisense	NM_001130446	C10orf131	hypothetical protein LOC100127889	+	97667721	97698415
ASHG19A3A043149	188.797	185.387	7.47641	7.61801	noncoding	ENST00000451364	RP11-429G19.2	Ensembl	716	chr10	-	97621069	97849912		TTATAATCGGAGTGGATTCCATACCTCTCATCCCTGGATTTTCATCTTGTGGCACTGGAT	natural antisense	NM_001776	ENTPD1	ectonucleoside triphosphate diphosphohydrolase 1	+	97515672	97637023
ASHG19A3A043149	188.797	185.387	7.47641	7.61801	noncoding	ENST00000451364	RP11-429G19.2	Ensembl	716	chr10	-	97621069	97849912		TTATAATCGGAGTGGATTCCATACCTCTCATCCCTGGATTTTCATCTTGTGGCACTGGAT	natural antisense	NM_001164182	ENTPD1	ectonucleoside triphosphate diphosphohydrolase 1	+	97515672	97637023
ASHG19A3A043149	188.797	185.387	7.47641	7.61801	noncoding	ENST00000451364	RP11-429G19.2	Ensembl	716	chr10	-	97621069	97849912		TTATAATCGGAGTGGATTCCATACCTCTCATCCCTGGATTTTCATCTTGTGGCACTGGAT	intronic antisense	NM_019084	CCNJ	cyclin-J isoform 2	+	97803158	97820625
ASHG19A3A043149	188.797	185.387	7.47641	7.61801	noncoding	ENST00000451364	RP11-429G19.2	Ensembl	716	chr10	-	97621069	97849912		TTATAATCGGAGTGGATTCCATACCTCTCATCCCTGGATTTTCATCTTGTGGCACTGGAT	intronic antisense	NM_001159747	CC2D2B	protein CC2D2B isoform 1	+	97759847	97792441
ASHG19A3A033022	10994.7	15289.9	13.3529	13.9751	noncoding	NR_002206	GTF2IP1	RefSeq_NR	3638	chr7	-	74601105	74653445		GCGCTGCCTCCCTCGCCCCGCGGCTCCCCCTTGCAACTTGGCGGGCCTCCTCCCTTTTGT	intergenic
ASHG19A3A046486	82948.8	73993.6	16.344	16.1863	noncoding	ENST00000490750	RPLP0P2	Ensembl	961	chr11	+	61404151	61405112	NR_002775,NM_053275,NM_001002,ENST00000413306,	TTCCAGGCTTTAGGTATCATCACTAAAATCTCCAGGGGCGCCATTGAAATCCTGAGTGAT	intergenic
ASHG19A3A054087	150.855	157.183	7.15553	7.38041	noncoding	NR_027336	LOC100130015	RefSeq_NR	1380	chr16	-	90109309	90114181		AAATCTAAAAAACTTGCTGTCCTTGGTGTGATAAGGGGTGTCATCCCGAGTGTTCCTAGG	natural antisense	NM_001481	GAS8	growth arrest-specific protein 8	+	90089007	90111379
ASHG19A3A039583	885.79	1175.23	9.70134	10.2858	noncoding	ENST00000430057	AC002365.4	Ensembl	578	chrX	-	9992881	10006694		AGCACTTTTCAAAAAAGGATGCCACTTGAAATTCATTTATGTGCTGGGCGCGGTGGCTCA	intronic antisense	NM_015691	WWC3	protein WWC3	+	9983794	10112518
ASHG19A3A008687	8112.57	7466.98	12.9121	12.9425	noncoding	ENST00000437254	AC046185.2	Ensembl	414	chr17	-	61688128	61688546		CACCTCATCCCAACTATGGCCAAGAAGATGAAGGAGGCTCTCTTATCCATTGGGAAATAA	intergenic
ASHG19A3A053016	475.063	463.713	8.79775	8.95233	noncoding	uc002art.2	TMEM84	UCSC_knowngene	2228	chr15	+	69365265	69388161		AATGGATGGACTCCACCTCCGCAGCCACGCCTGCCCGTTTGCGCTTACTGAACAGAGGTC	intergenic
ASHG19A3A016956	349.032	301.166	8.35538	8.32457	noncoding	ENST00000447289	AC007563.5	Ensembl	552	chr2	+	217559186	217858722		AACGCCTCCTGCTCCATCACAGTGACTGCTCAAGGCAGGACACCTGATCCTATCGGAATC	natural antisense	NM_000599	IGFBP5	insulin-like growth factor-binding protein 5	-	217536827	217560272
ASHG19A3A016956	349.032	301.166	8.35538	8.32457	noncoding	ENST00000447289	AC007563.5	Ensembl	552	chr2	+	217559186	217858722		AACGCCTCCTGCTCCATCACAGTGACTGCTCAAGGCAGGACACCTGATCCTATCGGAATC	intronic antisense	NM_003284	TNP1	spermatid nuclear transition protein 1	-	217724181	217724782
ASHG19A3A034887	185.307	180.631	7.45059	7.58049	noncoding	ENST00000490162	RP5-884M6.1	Ensembl	789	chr7	+	106415456	106436010		TTCTCTATGCTAGAGCCATTGATGCCCTGTGCACTTCATTGCCTTTGACCATCATTCCTT	intergenic
ASHG19A3L0001912	119.276	131.933	6.81947	7.12644	noncoding	chr7:37833800-37845625-	lincRNA-GPR141-2	lincRNA	11826	chr7	-	37833800	37845625		CACAGTGAAAGTCTAAATATCTTAGAGCTTTTCCTCTGCTACTACAGAATCTTCCTAGAA	intergenic
ASHG19A3A007363	113.878	139.388	6.75549	7.20484	noncoding	NR_024621	C11orf21	RefSeq_NR	2177	chr11	-	2317506	2323143		GGAGACGGCGCCCGGGGAGGAGGAGCGCTGTGCCCAGGTGGCCTCACTTGTCATCTCAAA	exon sense-overlapping	NM_001142946	C11orf21	hypothetical protein LOC29125	-	2317506	2323143
ASHG19A3A007363	113.878	139.388	6.75549	7.20484	noncoding	NR_024621	C11orf21	RefSeq_NR	2177	chr11	-	2317506	2323143		GGAGACGGCGCCCGGGGAGGAGGAGCGCTGTGCCCAGGTGGCCTCACTTGTCATCTCAAA	bidirectional	NM_139022	TSPAN32	tetraspanin-32	+	2323242	2339430
ASHG19A3A032628	6610.76	7598.7	12.6079	12.9652	noncoding	ENST00000454922	AC005154.5	Ensembl	752	chr7	-	30624315	30625588		GAAACGTAGTAAGTTTATGTTTTTAAGGTCTGCCCCTCCCTTCTTGCATTATATCATAAA	intergenic
ASHG19A3A038475	147.059	249.794	7.11717	8.04828	noncoding	ENST00000418151	RP11-562M8.4	Ensembl	400	chr9	+	32926048	32926448		TAAAAAAGGAAAATCAAAGGGATGCACAGATGGTGGGTATTTACCTCTGTCCCCAGACAC	intergenic
ASHG19A3A013578	2393.15	2051.29	11.1351	11.0924	noncoding	ENST00000430650	AC009236.1	Ensembl	721	chr2	-	45419317	45550434		AAACCAATCGTCCCCCCACCTGATTCCAAAGGAATTACAGAAAAATGGAAAGCCAGGAAC	intergenic
ASHG19A3A044023	54.2567	69.8397	5.67608	6.20555	noncoding	ENST00000422016	RP11-93L14.1	Ensembl	760	chr10	+	69093880	69094640		TTACTGCACTATCAAGAGAAGGCAAGCCTAAAAGACATCCAGTCCCCAGGAATACTTGTG	intronic antisense	NM_013266	CTNNA3	catenin alpha-3	-	67679724	69455949
ASHG19A3A044023	54.2567	69.8397	5.67608	6.20555	noncoding	ENST00000422016	RP11-93L14.1	Ensembl	760	chr10	+	69093880	69094640		TTACTGCACTATCAAGAGAAGGCAAGCCTAAAAGACATCCAGTCCCCAGGAATACTTGTG	intronic antisense	NM_001127384	CTNNA3	catenin alpha-3	-	67679724	69425416
ASHG19A3A032100	96.5115	94.2906	6.52133	6.63227	noncoding	uc003qet.1	AK055166	UCSC_knowngene	2069	chr6	+	134758853	134825719		TAAGTGGTGCTTGCTAGCCCTACTAAGAATCCTGCCATTGTTGCAAATTTCAGAAAAAAG	intergenic
ASHG19A3A028581	22308.4	23121.9	14.3686	14.5656	noncoding	ENST00000513279	CTC-425H14.1	Ensembl	656	chr5	+	102368079	102368735		AACATTAAGCCCAAGAACCCTGTGGAGAAGATAGACTTTGACAGTGTGTCCAGCATCATG	intergenic
ASHG19A3A020380	5238.04	3654.13	12.2761	11.9145	noncoding	ENST00000414048	CTA-714B7.4	Ensembl	380	chr22	+	35560296	35561340		GTGTATCCTTATGGGAAGCTGTGTAATCCCCATGACCATCATGATGAATTTTGCCAATGC	intergenic
ASHG19A3A054040	387.28	375.817	8.50812	8.647	noncoding	AK055320		misc_RNA	3345	chr16	-	87355670	87359015		TTTAGTGAGAAAGGGTTGAGCTGTCCTTCTTTTTCCTTCCTTTTAAAAAGCATTTGGGCT	intergenic
ASHG19A3A018032	361.314	476.627	8.40777	8.99256	noncoding	ENST00000415932	RP11-199O14.1	Ensembl	1484	chr20	+	6427369	6509106		ATAACCAACATGGTGCTCATTAATTGGTCATGTGAGCACTAAGGATAACCACCCTCCCCT	intergenic
ASHG19A3A014357	359.066	453.324	8.39872	8.92051	noncoding	ENST00000446213	AC133785.1	Ensembl	573	chr2	-	131593447	131594304		AGAGGGAGAGCATCTGCCCAGACTGGCTTTTTGCACCCCTGCTCAAGCCTGCACCCTCGT	intergenic
ASHG19A3A044791	52467.7	56970.6	15.6524	15.8182	noncoding	ENST00000426436	AC127526.2	Ensembl	775	chr11	-	3570974	3571749	ENST00000483874,ENST00000479743,	GATGAGACGCATGCTAAAGTTGAATGAGCTGATGGATATGAACCACCAATCCAAGAATCT	intergenic
ASHG19A3A020365	97.3409	115.785	6.53405	6.93447	noncoding	ENST00000512799	Z71183.1	Ensembl	2584	chr22	+	32896546	32907788		ACATAGAACAAAGATTTGATTTAAACTGACTAGCTTAAATGTCACTCCTGGCCGGGCGCG	intergenic
ASHG19A3L0000857	153.869	143.455	7.18408	7.24422	noncoding	AI201251	lincRNA-LITAF-2	lincRNA	489	chr16	+	11477572	11478925		TCAGCTCATTGCCTGCTTCATTGTCATTGGTGCCCAGAAGGCCAGCGGATATGCCGTGCT	intergenic
ASHG19A3A037394	8756.58	5934.21	13.0234	12.6187	noncoding	ENST00000449433	RBPJP5	Ensembl	1258	chr9	-	41884909	41886167	NM_203284,NM_203283,NM_015874,NM_005349,ENST00000451936,ENST00000411556,ENST00000357305,	AAATGATGGAATCATATATTCCACCAGCCTTACCTTTACCTACACACCAGAAGCAGGGCC	intergenic
ASHG19A3A020354	213.162	173.942	7.65401	7.52707	noncoding	ENST00000434942	RP1-90G24.10	Ensembl	876	chr22	+	32601101	32665653		AATCAAGGAACTGGAGCCCCAGCTGACAATTCTATATCAGAACCCAAAGACGCTGAAGTT	bidirectional	NM_001159545	RFPL2	ret finger protein-like 2 isoform 3	-	32586421	32600718
ASHG19A3A020354	213.162	173.942	7.65401	7.52707	noncoding	ENST00000434942	RP1-90G24.10	Ensembl	876	chr22	+	32601101	32665653		AATCAAGGAACTGGAGCCCCAGCTGACAATTCTATATCAGAACCCAAAGACGCTGAAGTT	intronic antisense	NM_014227	SLC5A4	low affinity sodium-glucose cotransporter	-	32614462	32651318
ASHG19A3A040291	1420.02	1722.58	10.384	10.8404	noncoding	ENST00000423016	CTD-2230M5.1	Ensembl	168	chrX	-	113623440	113623608	NM_012470,	AACTTACAGACTTCCACAAGCAAGTCACTAGTGCTGAGGAATGTAACCAAGTTTGCTGGG	intergenic
ASHG19A3A038650	296.363	246.412	8.12652	8.02791	noncoding	ENST00000419207	RP11-160N1.9	Ensembl	719	chr9	+	44823712	44835521	ENST00000513381,ENST00000441101,ENST00000432067,	AAGACAAAGCAAAGGTATGAAAGGAACACACATCCCTGACTGACTAGGAGGAACAGAGCT	intergenic
ASHG19A3A038863	133.691	145.081	6.98093	7.26328	noncoding	ENST00000422653	RP11-213G2.1	Ensembl	1547	chr9	+	88368220	88401490	NM_017576,	TGACCCTCCAGCAAAAGGAGCACGAACAAAAGATGCAGTTGCTGTTACATCATTTCAAAG	intergenic
ASHG19A3A023469	2489.75	2168.53	11.1903	11.1744	noncoding	uc003fdp.1	BC125159	UCSC_knowngene	1578	chr3	+	160285456	160287034		TCAAGAAGGATGTGGATGAAACTTACATGAACAACGTAGAGCTGGAGTCTCACCTGGAAG	intergenic
ASHG19A3A036613	133.907	105.269	6.98292	6.79478	noncoding	ENST00000512867	RP11-400K9.2	Ensembl	2136	chr8	+	54449619	54452860		CCCATAAGCATCATCTTTCTGAAGGATTGATTACTAAATGATACAGATCTCCACATCATT	intergenic
ASHG19A3A016342	2213.96	1358.37	11.0192	10.4954	noncoding	ENST00000419523	AC068137.5	Ensembl	1542	chr2	+	131031480	131033022		GTGTACACTGCATGAAATATTATTTCATCCTAGGCTCATTTATTTCCCTAACAGCAGTAA	intergenic
ASHG19A3A036633	119.116	148.328	6.81768	7.29572	noncoding	ENST00000488148	RP11-756K15.1	Ensembl	337	chr8	+	58305104	58305441		GCACGGCATGAGAAAAATACTACAGATTATGCACAGTGGCTGTCATTGATCTAGATGATT	intergenic
ASHG19A3A017096	277.095	226.008	8.03025	7.90192	noncoding	ENST00000513620	AC068134.10	Ensembl	788	chr2	+	233207825	233208613		ATAAGAGTAGAGGAGCAGACAACCCAGTTGCAGATTTGAAGAAGCATGTGGAATTCCTTG	intergenic
ASHG19A3A043475	770.554	1120.27	9.50142	10.2185	noncoding	ENST00000430526	RP11-122K13.8	Ensembl	264	chr10	-	135158146	135158410		AAGATGAAGACCTGTTCCGGGAATGGCCAAAGGACTCGTGGTGCCAACACCAAGCAGTCC	intergenic
ASHG19A3A044567	4279.19	4277.78	11.9893	12.1366	noncoding	ENST00000231383	RP11-179H18.4	Ensembl	813	chr10	+	121380579	121381392	NR_026591,NM_002853,	CAGATAACCGAGGCTTCCTTTCATTACAGTATATGATTAGAAATGAAGATGGACCAATAT	intergenic
ASHG19A3A010056	364.911	243.375	8.42155	8.00978	noncoding	BC025731		misc_RNA	1948	chr17	+	79507579	79519366		AATCTGCTTTGTGCTCCACGGCCTCCAAGCACTTTCATGAGCGTTCTGCTCCTACGTGGC	natural antisense	NM_025161	C17orf70	Fanconi anemia-associated protein of 100 kDa	-	79506910	79519429
ASHG19A3L0003153	66.7232	89.3978	5.98156	6.5532	noncoding	chr8:25437747-25443124-	lincRNA-CDCA2	lincRNA	5378	chr8	-	25437747	25443124		CCTTCTTCTAATCTCCAAGTTAAAAACCTCTAAACCTCTGACTTTTAGACATCAGATTTC	intergenic
ASHG19A3A026463	106.76	91.3048	6.66621	6.58153	noncoding	NR_003263	SDHAP3	RefSeq_NR	1153	chr5	-	1572074	1594646		ATGGCGGTCTGGGTCCTGTCGCGCCTGCTGAGCGCTCCGCGCCTGGCGCTGGCCAAGGCG	intergenic
ASHG19A3A047548	379.781	211.866	8.47991	7.81243	noncoding	AK123484		misc_RNA	1926	chr12	-	49320323	49322247		CACTAACAGAAACAGGAGATAGGGAGGAAGTCTAGGTTGTTGCAGGTGGATTGGAAGAAT	intergenic
ASHG19A3L0000851	209.333	185.468	7.62667	7.61901	noncoding	BC041387	lincRNA-MCTP2-2	lincRNA	4605	chr15	+	94774954	95023632	NM_018349,NM_001159643,	CACAGTATTTCCCTGCCATGTAAAAATCCTGACTTTGTGCGTATATAAAATGTATGCAAT	exon sense-overlapping	NM_018349	MCTP2	multiple C2 and transmembrane domain-containing	+	94841429	95027181
[truncated: 17,816 more rows]
