# Supplementary material for: The Role of PinX1 in Growth Control of Breast Cancer Cells and Its Potential Molecular Mechanism by mRNA and lncRNA Expression Profiles Screening
Source: Biomed Res Int. 2014 Feb 3;2014:978984. doi: 10.1155/2014/978984 (PMC3929369; doi:10.1155/2014/978984)
Supplement: Supplementary file 1 — Human LncRNA Array V2.0 was applied for screening the alterations of lncRNA and mRNA expression profile between PinX1 overexpressed and control MCF-7 cells. After the quantile normalization and data filtering steps, the mRNA expression profile data qualified for fold-change comparison was listed in Tables S1, and lncRNA expression profile data was listed in Table S2. The differentially expressed mRNAs was listed in Tables S3 and differentially expressed lncRNAs was listed in Tables S4. GO analysis of the differentially expressed mRNAs by biological processes, cellular components and molecular functions was showed in Table S5. Profiling data of enhancer-like lncRNAs was listed in Table S6. The enhancer-like lncRNAs and their adjacent coding gene pairs was listed in Table S7. Profiling data of the Rinn lincRNAs was listed in Table S8. The Rinn lincRNAs and their adjacent coding gene pairs was listed in Table S9. Profiling data of the Hox clusters was listed in Table S10. [file 978984.f1.zip › 978984.f1/Table S3.xls]

## Sheet: mRNAs_up
# Fold Change cut-off: 2.0 # Condition pairs: pcDNA3.1-PinX1 vs Empty Vector # Column A: ProbeName, it represents probe name. # Column B: Fold change, positive value indicates up-regulation and negative value indicates down-regulation. # Column C: Log Fold change, log2 value of absolute fold change. Positive value indicates up-regulation and negative value indicates down-regulation. # Column D: A…
pcDNA3.1-PinX1 vs Empty Vector 2.0 fold up regulated mRNAs
	Fold Change and Regulation				Annotations																Raw Intensities		Normalized Intensities
ProbeName	Fold change([pcDNA3.1-PinX1] vs [Empty Vector])	Log Fold change([pcDNA3.1-PinX1] vs [Empty Vector])	Absolute Fold change([pcDNA3.1-PinX1] vs [Empty Vector])	Regulation([pcDNA3.1-PinX1] vs [Empty Vector])	type	seqname	GeneSymbol	source	RNAlength	chrom	strand	txStart	txEnd	Xhyb	probeSeq	EntrezID	unigene	GO	ProteinAccession	product	[pcDNA3.1-PinX1](raw)	[Empty Vector](raw)	[pcDNA3.1-PinX1](normalized)	[Empty Vector](normalized)
ASHG19A3A052285	2.8354	1.50355	2.8354	up	coding	NM_005621	S100A12	RefSeq_coding	466	chr1	-	153346183	153348075		TGAAGGCTTTTTACCCAGCAATGTCCTCAATGAGGGTCTTTTCTTTCCCTCACCAAAACC	6283	Hs.19413	GO:0050786|GO:0050786|GO:0005509|GO:0005515|GO:0008270|GO:0042742|GO:0050832|GO:0006954|GO:0045087|GO:0031640|GO:0043123|GO:0006805|GO:0005737|GO:0005829|GO:0005576|GO:0005626|GO:0005634	NP_005612	S100 calcium binding protein A12	2450.83	976.35	11.3462	9.8426
ASHG19A3A034281	2.19399	1.13355	2.19399	up	coding	NM_001029835	CCM2	RefSeq_coding	1892	chr7	+	45067232	45116068		AATCTCTCCAAAGAAATTCCTCAAACAGAATTTCACACAGGGTATTCCATGGAGAATGAG	83605	Hs.148272	GO:0005515|GO:0061154|GO:0007229|GO:0051403|GO:0001570|GO:0005737	NP_113631	Cerebral cavernous malformation 2	122.912	62.7206	7.02508	5.89152
ASHG19A3A003879	2.16036	1.11127	2.16036	up	coding	NM_001223	CASP1	RefSeq_coding	1301	chr11	-	104896245	104972158	NM_001017534,	GCAGGGACGCTGGGACTCTCAGCAGCTCCTCAGGCAGTGCAGGACAACCCAGCTATGCCC	834	Hs.2490	GO:0008656|GO:0004197|GO:0008233|GO:0005515|GO:0006915|GO:0071260|GO:0043123|GO:0006508|GO:0042981|GO:0007165|GO:0005737|GO:0005829|GO:0005829|GO:0005622	NP_150637	Caspase 1, apoptosis-related cysteine peptidase (interleukin 1, beta, convertase)	110.719	57.4106	6.8685	5.75723
ASHG19A3A046260	2.08608	1.06079	2.08608	up	coding	NM_033467	MMEL1	RefSeq_coding	2902	chr1	-	2522080	2564481		TTCATACAAACTGTGCTATCCTCTGTCAAAATCAAGCTGCTGCCAGATGAGGAAGTGGTG	79258	Hs.591453	GO:0046872|GO:0004222|GO:0008233|GO:0006508|GO:0005576|GO:0016021|GO:0043231|GO:0016020	NP_258428	Membrane metallo-endopeptidase-like 1	130.017	69.7589	7.1066	6.04581
ASHG19A3A004242	2.67486	1.41946	2.67486	up	coding	NM_004156	PPP2CB	RefSeq_coding	1807	chr8	-	30643126	30670352		ACTcccgcggcgcgcggccgggcggggaagggcggcggccgggctggggCTCGGGATCCG						309.771	130.471	8.3669	6.94744
ASHG19A3A036200	2.18469	1.12743	2.18469	up	coding	NM_003695	LY6D	RefSeq_coding	806	chr8	-	143866297	143868008		CACTCCTTCTGTTTTGTTGCCGTTTATTTTTGTACTCAAATCTCTACATGGAGATAAATG	8581	Hs.415762	GO:0005515|GO:0007155|GO:0030098|GO:0031225|GO:0009986|GO:0005624|GO:0005886	NP_003686	Lymphocyte antigen 6 complex, locus D	563.978	291.797	9.23274	8.10531
ASHG19A3A005811	2.68114	1.42285	2.68114	up	coding	NM_133454	SGSM1	RefSeq_coding	6018	chr22	+	25202135	25322813	NM_001098498,	GATGACGGAAACAGAAAGGAAAGAGTCCTCCCAGAGCTGCAGTTCGGGCCGCCAGAACAT	129049	Hs.474397	GO:0005097|GO:0032313|GO:0005794|GO:0005622	NP_597711	Small G protein signaling modulator 1	175.217	73.2382	7.53738	6.11453
ASHG19A3A014498	2.23817	1.16232	2.23817	up	coding	NM_019845	RPRM	RefSeq_coding	1496	chr2	-	154333851	154335322		CGGTTTACGCCACAAAAGTGCTCTTGACATCCGTGACACCGTTTTGACTTTTTGTTTTTT	56475	Hs.100890	GO:0005515|GO:0007050|GO:0007346|GO:0005737|GO:0016021|GO:0016020	NP_062819	Reprimo, TP53 dependent G2 arrest mediator candidate	3402.52	1693.46	11.8067	10.6444
ASHG19A3A029246	5.28981	2.40322	5.28981	up	coding	NM_015111	N4BP3	RefSeq_coding	5987	chr5	+	177540555	177553107		CACCTCATGGAAAGAATGAAGAGCCAGAAATAGATTCTATTCTGTAGAAAATCTTACACA	23138	Hs.101761	GO:0005737|GO:0031410|GO:0030659|GO:0016020	NP_055926	NEDD4 binding protein 3	7289.74	1539.73	12.9039	10.5007
ASHG19A3A031505	3.68975	1.88352	3.68975	up	coding	NM_176823	S100A7A	RefSeq_coding	4279	chr1	+	153388999	153395701	NM_002963,	TAGGCATGATCGACATGTTTCACAAATACACCGGACGTGATGGCAAGATTGAGAAGCCAA	338324	Hs.442337	GO:0005509|GO:0005737	NP_789793	S100 calcium binding protein A7A	2072.28	639.368	11.1082	9.22464
ASHG19A3A047144	2.18137	1.12524	2.18137	up	coding	NM_021978	ST14	RefSeq_coding	3319	chr11	+	130029681	130080256		AAATGAGAATTTTGTGGATGCCTACGAGAACTCCAACTCCACTGAGTTTGTAAGCCTGGC	6768	Hs.504315	GO:0008233|GO:0004252|GO:0008236|GO:0006508|GO:0016323|GO:0005576|GO:0005615|GO:0019897|GO:0005887|GO:0005886	NP_068813	Suppression of tumorigenicity 14 (colon carcinoma)	206.137	105.424	7.77317	6.64794
ASHG19A3A031662	2.05031	1.03584	2.05031	up	coding	NM_004282	BAG2	RefSeq_coding	2068	chr6	+	57037103	57050010		ATCCTTCTGGAAATGATCCACAGTATCCAAAATAGCCAGGACATGAGGCAGATCAGTGAC	9532	Hs.729098	GO:0005515|GO:0006915|GO:0006457|GO:0019538	NP_004273	BCL2-associated athanogene 2	482.756	266.17	9.01059	7.97474
ASHG19A3A033098	3.37031	1.75288	3.37031	up	coding	NM_014510	PCLO	RefSeq_coding	17095	chr7	-	82449795	82792197		GTGTTGGGCATGTGAATCTCCAAGTGCCTGTGTAATAAATAAAGTATCTTTATTTCATTC	27445	Hs.12376	GO:0005509|GO:0005544|GO:0005522|GO:0005215|GO:0008270|GO:0007010|GO:0016079|GO:0030054|GO:0005856|GO:0016020|GO:0045202|GO:0008021	NP_149015	Piccolo (presynaptic cytomatrix protein)	4797.1	1595.59	12.3075	10.5546
ASHG19A3A006639	2.88653	1.52934	2.88653	up	coding	NM_182759	FAM19A3	RefSeq_coding	1077	chr1	+	113263188	113269854		CGGGCAAAGCCCTCCTGCGTGGACGCCTCCATCGTCCTGCAGAGATGGTGGTGTCAGATG	284467	Hs.439116	GO:0005576	NP_877436	Family with sequence similarity 19 (chemokine (C-C motif)-like), member A3	157.221	61.1811	7.38082	5.85149
ASHG19A3A043221	2.07269	1.0515	2.07269	up	coding	NM_005066	SFPQ	RefSeq_coding	3073	chr1	-	35649202	35658743		AAAGGCATTGTTGAATTTGCTTCTAAGCCAGCAGCAAGAAAGGCATTTGAACGATGCAGT	6421	Hs.355934	GO:0003677|GO:0003723|GO:0000166|GO:0005515|GO:0006310|GO:0006281|GO:0008380|GO:0000380|GO:0006397|GO:0016363|GO:0005654|GO:0005634|GO:0042382	NP_005057	Splicing factor proline/glutamine-rich	846.828	463.933	9.81466	8.76316
ASHG19A3A054818	2.20816	1.14285	2.20816	up	coding	NM_130897	DYNLRB2	RefSeq_coding	506	chr16	+	80574853	80584539		AGCGACACTGGGTTGGAAACACTTGGCTCTCTCATGAGTATTAAAATTCTATTTCAATCT	83657	Hs.98849	GO:0003777|GO:0007018|GO:0006810|GO:0005737|GO:0005868|GO:0005868|GO:0005856|GO:0005874	NP_570967	Dynein, light chain, roadblock-type 2	1629.91	834.012	10.7574	9.61451
ASHG19A3A002890	2.97349	1.57216	2.97349	up	coding	NM_001145966	MKI67	RefSeq_coding	11427	chr10	-	129894926	129924468		CAAGATCTAGCTTCTCTTCTGACCCTGATGAGAGTGAGGGAATACCTTTGAAAAGAAGGC	4288	Hs.80976	GO:0005524|GO:0000166|GO:0008022|GO:0005515|GO:0007049|GO:0008283|GO:0005694|GO:0005730|GO:0005634	NP_002408	Antigen identified by monoclonal antibody Ki-67	382.612	145.406	8.67194	7.09978
ASHG19A3A036021	2.56669	1.35991	2.56669	up	coding	NM_005655	KLF10	RefSeq_coding	2968	chr8	-	103661004	103667983		ACGGCGCTGAGCGCGGCGGCGGCGGGAGCGGCGTCGAGTGTCTCCGTGCGCCCGTCTGTG	7071	Hs.435001	GO:0003677|GO:0046872|GO:0005515|GO:0003700|GO:0008270|GO:0008283|GO:0007267|GO:0006917|GO:0008285|GO:0000122|GO:0001501|GO:0006351|GO:0007179|GO:0005622|GO:0005634	NP_005646	Kruppel-like factor 10	205.195	89.4074	7.76617	6.40626
ASHG19A3A036536	7.46913	2.90094	7.46913	up	coding	NM_001003791	ERLIN2	RefSeq_coding	1538	chr8	+	37594096	37604070	NM_001003790,	CACTGAAGCAGTGTGACATAAAATAATACCTATGTATACAACACTCCTCTGTAAATAGCA	11160	Hs.705490	GO:0005515|GO:0030433|GO:0005737|GO:0005783|GO:0005789|GO:0016021|GO:0005886	NP_009106	ER lipid raft associated 2	644.631	96.632	9.42462	6.52368
ASHG19A3A014781	2.89865	1.53538	2.89865	up	coding	NM_139266	STAT1	RefSeq_coding	2798	chr2	-	191840262	191878976		CAGCTGAACTTGTTGAGATCCCCGTGTTACTGCCTATCAGCATTTTACTACTTTAAAAAA	6772	Hs.642990	GO:0003677|GO:0005509|GO:0005515|GO:0043565|GO:0003700|GO:0004871|GO:0007249|GO:0007259|GO:0006919|GO:0008015|GO:0032869|GO:0019221|GO:0006917|GO:0060333|GO:0044419|GO:0031663|GO:0048661|GO:0060334|GO:0006355|GO:0060338|GO:0009617|GO:0051591|GO:0034097|GO:0042493|GO:0043330|GO:0042542|GO:0032496|GO:0009612|GO:0007584|GO:0014070|GO:0043434|GO:0009615|GO:0007165|GO:0006366|GO:0060337|GO:0007260|GO:…	NP_644671	Signal transducer and activator of transcription 1, 91kDa	24555.2	9331.82	14.6525	13.1172
ASHG19A3A049676	3.24149	1.69665	3.24149	up	coding	NM_138444	KCTD12	RefSeq_coding	6255	chr13	-	77454303	77460540		ACTAGCTACTGTTTTCCTTCCTGTGTGTGAAGTAATGAATCATTGATTATGTGACTTGTT	115207	Hs.644125	GO:0005515|GO:0005249|GO:0006813|GO:0030054|GO:0005886|GO:0045211|GO:0042734|GO:0045202|GO:0008076	NP_612453	Potassium channel tetramerisation domain containing 12	3376.52	1162.44	11.7963	10.0997
ASHG19A3A045347	4.25468	2.08905	4.25468	up	coding	NM_138456	BATF2	RefSeq_coding	2142	chr11	-	64755416	64764517		TGGATACAGAACACAAGTCTTGGCACATATGTGATGGAAATAAAGTGTTTTGCAATCTTT	116071	Hs.124840	GO:0005515|GO:0046983|GO:0043565|GO:0003700|GO:0006355|GO:0005634	NP_612465	Basic leucine zipper transcription factor, ATF-like 2	660.328	175.366	9.458	7.36895
ASHG19A3A040798	2.01538	1.01105	2.01538	up	coding	NM_002367	MAGEB4	RefSeq_coding	2266	chrX	+	30260056	30262295		TCCATTGTCTTCCCTCCATTAAGAGAAGACTTTAAGAGATGAGGGAGAGAGAGCCAGAGA	4115	Hs.113291		NP_002358	Melanoma antigen family B, 4	290.933	162.168	8.2704	7.25934
ASHG19A3A016925	2.80898	1.49005	2.80898	up	coding	NM_001135248	MFAP2	RefSeq_coding	1121	chr1	-	17300999	17307173		CGGGCCAAGGGGCGGCTCCGGCGGGCGGACTCGGAGCGGGCGGCGGAGTGACCCGGACAG	4237	Hs.389137	GO:0005576|GO:0001527|GO:0005578	NP_059453	Microfibrillar-associated protein 2	379.617	152.436	8.66069	7.17065
ASHG19A3A021361	6.98483	2.80423	6.98483	up	coding	NM_170662	CBLB	RefSeq_coding	3976	chr3	-	105377109	105587887		AATGACAAAGATGTCAAGATTGAGCCTTGTGGGCATTTGATGTGCACCTCTTGCCTTACG	868	Hs.430589	GO:0005509|GO:0016874|GO:0004871|GO:0008270|GO:0006607|GO:0042110|GO:0007166|GO:0006955|GO:0050860|GO:0046642|GO:0002669|GO:0045732|GO:0007165|GO:0005737|GO:0005730|GO:0005634	NP_733762	Cas-Br-M (murine) ecotropic retroviral transforming sequence b	325.012	52.5519	8.43528	5.63105
ASHG19A3A004945	2.06009	1.04271	2.06009	up	coding	NM_001018054	LRP8	RefSeq_coding	4351	chr1	-	53711217	53793726	NM_017522,	CTGCTCAGATTGGCCATGTCTATCCTGCACGAGTGGCATTAAGCCTTGAAGATGATGGAC	7804	Hs.726256	GO:0034187|GO:0005509|GO:0005515|GO:0004888|GO:0030229|GO:0007596|GO:0019221|GO:0006897|GO:0021766|GO:0021819|GO:0006629|GO:0030168|GO:0045860|GO:0006508|GO:0007165|GO:0005901|GO:0005576|GO:0005615|GO:0016021|GO:0005886	NP_150643	Low density lipoprotein receptor-related protein 8, apolipoprotein e receptor	1161.92	640.757	10.2718	9.22908
ASHG19A3A012824	11.5852	3.53421	11.5852	up	coding	NM_198541	IGFL1	RefSeq_coding	771	chr19	+	46733008	46734498		CATCTCAAGTTCTCTTCTATCCAGGAGCAAAGCACAGGATCATAATAAATTTATGTACTT	374918	Hs.546554	GO:0005576	NP_940943	IGF-like family member 1	1751.25	170.762	10.8659	7.33165
ASHG19A3A042268	2.20188	1.13873	2.20188	up	coding	NM_016076	PPPDE1	RefSeq_coding	4093	chr1	+	244816351	244872332		AATATACCTCATCCATTGGAATTGGAGTTTTTCATTCAGGAATTGAAGTCTATGGCAGAG	51029	Hs.498317		NP_057160	PPPDE peptidase domain containing 1	161.697	82.1528	7.42132	6.28259
ASHG19A3A054819	2.5236	1.33548	2.5236	up	coding	NM_001079843	CASZ1	RefSeq_coding	7938	chr1	-	10696667	10856707		CTCCTCGGCACCTGGTTATTAAGAACTGAATATTTTTCCACTTGAATTTAGTGCTATTAG	54897	Hs.439894	GO:0003677|GO:0046872|GO:0008270|GO:0005737|GO:0005622|GO:0043231|GO:0005730|GO:0005634	NP_060236	Castor zinc finger 1	1673.67	749.367	10.7943	9.45877
ASHG19A3A052001	2.09319	1.0657	2.09319	up	coding	NM_005739	RASGRP1	RefSeq_coding	5048	chr15	-	38780302	38857007		GGAGTGTCTCCCAAACCTGATCCAAAAACCATTAGCAAACACGTCCAGAGGATGGTGGAT	10125	Hs.591127	GO:0005509|GO:0005085|GO:0008289|GO:0005515|GO:0007265|GO:0007596|GO:0030154|GO:0030168|GO:0051056|GO:0007165|GO:0005794|GO:0000139|GO:0005737|GO:0005829|GO:0005783|GO:0005789|GO:0005622|GO:0005624|GO:0005886	NP_005730	RAS guanyl releasing protein 1 (calcium and DAG-regulated)	188.607	100.062	7.64096	6.57526
ASHG19A3A038857	2.01105	1.00795	2.01105	up	coding	NM_001007097	NTRK2	RefSeq_coding	7111	chr9	+	87284625	87430621		GTTCAACCATTTGCTGTAATCCAGAGGCAGCCTGTGAATCATTCTCATGCCCTGTTTTTT	4915	Hs.494312	GO:0005524|GO:0043121|GO:0005030|GO:0000166|GO:0016740|GO:0004714|GO:0007190|GO:0030154|GO:0007275|GO:0048011|GO:0007399|GO:0006468|GO:0007169|GO:0005887|GO:0016020	NP_006171	Neurotrophic tyrosine kinase, receptor, type 2	186.755	103.388	7.62754	6.61959
ASHG19A3A002334	3.70865	1.89089	3.70865	up	coding	NM_001135652	EIF2AK2	RefSeq_coding	2266	chr2	-	37333698	37374965		AAACAAAGTATACTGTGGACAAGAGGAAGGCGGAGCGTGAAGTAAAAGCATTGGCAAAAC	5610	Hs.131431	GO:0005524|GO:0003725|GO:0004694|GO:0000166|GO:0005515|GO:0008601|GO:0004674|GO:0030683|GO:0044419|GO:0019054|GO:0008285|GO:0033689|GO:0046777|GO:0006468|GO:0009615|GO:0019058|GO:0019048|GO:0005829|GO:0005622	NP_002750	Eukaryotic translation initiation factor 2-alpha kinase 2	479.814	146.492	9.00291	7.11202
ASHG19A3A006757	2.01283	1.00923	2.01283	up	coding	NM_198212	CAV2	RefSeq_coding	3144	chr7	+	116139443	116148594		CCCACCGGCTCAACTCGCATCTCAAGGATTTTAATGCCTTTTGTAAAGACCTGCCTAATG	858	Hs.212332	GO:0031748|GO:0051219|GO:0005515|GO:0042803|GO:0019905|GO:0070836|GO:0007029|GO:0007005|GO:0008285|GO:0001937|GO:0060161|GO:0051259|GO:0007088|GO:0048741|GO:0007268|GO:0048278|GO:0006906|GO:0016050|GO:0005794|GO:0000139|GO:0005901|GO:0009986|GO:0005737|GO:0005829|GO:0031234|GO:0005887|GO:0005622|GO:0005811|GO:0005624|GO:0005624|GO:0045121|GO:0005634|GO:0048471|GO:0005886|GO:0043234|GO:0030133	NP_937855	Caveolin 2	1309.08	735.46	10.4411	9.43186
ASHG19A3A035718	2.4082	1.26795	2.4082	up	coding	NM_152568	NKX6-3	RefSeq_coding	551	chr8	-	41503828	41504878		TGCCCTGGGGCGAGAGCTGGGGGGAAGAAGCAGACACTCCTGCATGTCTTTCTGCTTCTG	157848	Hs.647132	GO:0043565|GO:0003700|GO:0030528|GO:0006355|GO:0005634	NP_689781	NK6 homeobox 3	134.704	62.5641	7.15485	5.8869
ASHG19A3A001910	2.34283	1.22825	2.34283	up	coding	NM_001114380	ITGAL	RefSeq_coding	4974	chr16	+	30483982	30534505		AGGGACACCGAGGGACCAAAGGGCGGGCAAGGACATACCGCCCATCCTGAGACCCTCCCT	3683	Hs.174103	GO:0050839|GO:0005515|GO:0004872|GO:0002291|GO:0050798|GO:0007596|GO:0007155|GO:0006928|GO:0007157|GO:0006954|GO:0007229|GO:0007159|GO:0050900|GO:0042102|GO:0050850|GO:0022409|GO:0050776|GO:0007165|GO:0009897|GO:0001772|GO:0016021|GO:0008305|GO:0005886|GO:0005886	NP_002200	Integrin, alpha L (antigen CD11A (p180), lymphocyte function-associated antigen 1; alpha polypeptide)	149.433	71.5241	7.30882	6.08057
ASHG19A3A016726	2.21295	1.14597	2.21295	up	coding	NM_005966	NAB1	RefSeq_coding	4499	chr2	+	191513847	191557491		TTCAAGCTGTTGGTGAGGTGGGACGAATGCACTTGCTTCCTGTGGCAATAAAGATTTTCT	4664	Hs.107474	GO:0016564|GO:0014037|GO:0001958|GO:0042552|GO:0045682|GO:0006355|GO:0005634	NP_005957	NGFI-A binding protein 1 (EGR1 binding protein 1)	7083.19	3554.28	12.8671	11.7211
ASHG19A3A023776	2.0907	1.06399	2.0907	up	coding	NM_002577	PAK2	RefSeq_coding	6139	chr3	+	196466727	196559516	NR_027053,	CTCTGTTCCAGAAGAGAAAAAGCCCAGGCATAAAATCATCTCCATATTCTCAGGCACAGA	5062	Hs.518530	GO:0005524|GO:0042802|GO:0000166|GO:0005515|GO:0004672|GO:0019901|GO:0004674|GO:0030296|GO:0016740|GO:0031295|GO:0050852|GO:0006915|GO:0007411|GO:0006921|GO:0044419|GO:0006469|GO:0018105|GO:0050731|GO:0061098|GO:0046777|GO:0006468|GO:0042981|GO:0050690|GO:0040008|GO:0007165|GO:0016032|GO:0005737|GO:0005829|GO:0005829|GO:0005634|GO:0048471|GO:0005886	NP_002568	P21 protein (Cdc42/Rac)-activated kinase 2	3041.95	1632.29	11.6493	10.5853
ASHG19A3A027450	2.07539	1.05338	2.07539	up	coding	NM_003551	NME5	RefSeq_coding	1243	chr5	-	137450861	137475132		ATGCCAACTCTGCTTGAAGGACTCACAGAGCTTTGTAAGCAAAAACCAGCAGATCCTTTG	8382	Hs.519602	GO:0005524|GO:0004550|GO:0005515|GO:0006241|GO:0006183|GO:0006228|GO:0006916|GO:0007275|GO:0006165|GO:0009116|GO:0007286|GO:0007283|GO:0005575	NP_003542	Non-metastatic cells 5, protein expressed in (nucleoside-diphosphate kinase)	123.307	66.4916	7.03028	5.97689
ASHG19A3A014545	2.2655	1.17983	2.2655	up	coding	NM_002897	RBMS1	RefSeq_coding	4296	chr2	-	161128662	161350318		CCTAGGACTTGTTGTTAAACGCCAAAAGACATTTTTGAACTGTACATTTGATCAGATTGT	5937	Hs.470412	GO:0003677|GO:0003723|GO:0003690|GO:0000166|GO:0005515|GO:0003697|GO:0006260|GO:0006396|GO:0005634	NP_058520	RNA binding motif, single stranded interacting protein 1	9029.16	4408.78	13.2107	12.0309
ASHG19A3A048137	2.09464	1.0667	2.09464	up	coding	NM_001167856	SBNO1	RefSeq_coding	10981	chr12	-	123773656	123834988		ACCATTGATAATGGCTGGTTATCAGCATTGCAGCTTGAGGCAATTACATATGCAGCCCAG	55206	Hs.7012	GO:0005524|GO:0003677|GO:0016787|GO:0003674|GO:0008150|GO:0005575	NP_060653	Strawberry notch homolog 1 (Drosophila)	149.255	79.8241	7.307	6.24029
ASHG19A3A043902	3.95913	1.98518	3.95913	up	coding	NM_001630	ANXA8L2	RefSeq_coding	2053	chr10	+	47746919	47763038	NM_001098845,NM_001040084,	CCTGGAGATTCTGAAGTGCCTTTGCTGTGGTTTTCAAAATAATAAAGATTTGTATTCAAC	244	Hs.705389	GO:0005509|GO:0005544	NP_001621	Annexin A8-like 2	1216.7	348.473	10.3372	8.35202
ASHG19A3A050777	2.06445	1.04576	2.06445	up	coding	NM_052978	TRIM9	RefSeq_coding	4393	chr14	-	51462785	51562422		CGGAACAAGTTCTCTTCCAACAAAGAAACTGTACTGTAGAAATTAATTTCCTCCATGAAT	114088	Hs.654750	GO:0016874|GO:0046872|GO:0042803|GO:0004842|GO:0008270|GO:0043161|GO:0016567|GO:0030054|GO:0042995|GO:0005737|GO:0031410|GO:0005856|GO:0030425|GO:0005622|GO:0045202|GO:0008021	NP_443210	Tripartite motif-containing 9	118.857	64.3734	6.97525	5.9295
ASHG19A3A001192	3.71092	1.89178	3.71092	up	coding	NM_001032409	OAS1	RefSeq_coding	1575	chr12	+	113344738	113357711		CCCAGTGAGCTCCTGGATTCTGCTGACCCAGCACACTCCAGGCAGCATCCACCCCACAGG	4938	Hs.524760	GO:0005524|GO:0003723|GO:0000166|GO:0016779|GO:0016740|GO:0019221|GO:0006955|GO:0060333|GO:0006139|GO:0060337|GO:0005737|GO:0005783|GO:0005792|GO:0005739|GO:0005634	NP_058132	2',5'-oligoadenylate synthetase 1, 40/46kDa	1009.48	306.365	10.0646	8.17287
ASHG19A3A025389	3.38182	1.7578	3.38182	up	coding	NM_001173523	PCDH7	RefSeq_coding	8728	chr4	+	30722036	31148423		CGCAACTATGCTTAACATGGCGAAATGTATTAAACACTCGTCCAACTATTTATGAAATAC	5099	Hs.479439	GO:0005509|GO:0007155|GO:0007156|GO:0005887|GO:0005886	NP_115833	Protocadherin 7	5176.02	1718.42	12.4208	10.663
ASHG19A3A052292	3.35846	1.7478	3.35846	up	coding	NM_002964	S100A8	RefSeq_coding	428	chr1	-	153362508	153363549		TACTCCCTGATAAAGGGGAATTTCCATGCCGTCTACAGGGATGACCTGAAGAAATTGCTA	6279	Hs.416073	GO:0005509|GO:0005515|GO:0002526|GO:0006935|GO:0002544|GO:0006954|GO:0045471|GO:0032496|GO:0010043|GO:0042060|GO:0005737|GO:0005856|GO:0005576|GO:0005615|GO:0005886	NP_002955	S100 calcium binding protein A8	16870.6	5590.63	14.1151	12.3673
ASHG19A3A053258	2.63398	1.39724	2.63398	up	coding	NM_001145044	SLCO3A1	RefSeq_coding	2853	chr15	+	92396937	92715665		GTGTGGTACTCTGTATTTTTGCAGCGTTTATTTTCCAAATGAGCAGTTTAGAAATATGTG	28232	Hs.311187	GO:0015347|GO:0005215|GO:0006811|GO:0043252|GO:0055085|GO:0016021|GO:0005886	NP_037404	Solute carrier organic anion transporter family, member 3A1	617.538	263.901	9.35875	7.96151
ASHG19A3A052717	2.57602	1.36514	2.57602	up	coding	NM_015995	KLF13	RefSeq_coding	6817	chr15	+	31619082	31670101		GCCTTGGCTTGCTCGGATAAAACTTTGTATGTATTTTGTATGGCATAGATTCTATATTGT	51621	Hs.525752	GO:0003677|GO:0003702|GO:0046872|GO:0005515|GO:0008270|GO:0008285|GO:0045944|GO:0045646|GO:0006366|GO:0005622|GO:0005634	NP_057079	Kruppel-like factor 13	8189.43	3517.93	13.0719	11.7068
ASHG19A3A001974	2.26761	1.18117	2.26761	up	coding	NM_001126337	TUFT1	RefSeq_coding	3083	chr1	+	151512780	151556058		CGTGCACCCAGAGGACCAGGCGGCGGCGGGCAGGAAGACCTATGCCATGGTGTCCAGCCA	7286	Hs.489922	GO:0030345|GO:0030282|GO:0042476|GO:0005737|GO:0005576	NP_064512	Tuftelin 1	355.277	176.903	8.56377	7.3826
ASHG19A3A003040	2.27741	1.18739	2.27741	up	coding	NM_001160125	KLF6	RefSeq_coding	4555	chr10	-	3818188	3827473		AAAGCACACCAGCGGACGCACACAGGTGTTTTTCCAGGTCTGACCACCTGGCCCTGCACA	1316	Hs.4055	GO:0003677|GO:0003690|GO:0046872|GO:0003700|GO:0016563|GO:0008270|GO:0030183|GO:0045944|GO:0006355|GO:0042060|GO:0005622|GO:0005634	NP_001291	Kruppel-like factor 6	364.652	181.49	8.60647	7.41908
ASHG19A3A030062	14.5429	3.86224	14.5429	up	coding	NM_021073	BMP5	RefSeq_coding	2207	chr6	-	55620239	55740375		AACACAAGTGAGCAAAAACAAGCCTGTAAGAAGCACGAACTCTATGTGAGCTTCCGGGAT	653	Hs.296648	GO:0070700|GO:0005125|GO:0008083|GO:0051216|GO:0030154|GO:0040007|GO:0030539|GO:0001503|GO:0007389|GO:0001501|GO:0005575|GO:0005576|GO:0005615	NP_066551	Bone morphogenetic protein 5	3087.63	237.418	11.668	7.80575
ASHG19A3A006647	2.70822	1.43734	2.70822	up	coding	NM_182826	SCARA3	RefSeq_coding	1711	chr8	+	27491576	27534286		CTTCGCAATGTCACCATCCTACGAGGTCACACTTTGTTTTCACATAATCGGATATGATAT	51435	Hs.128856	GO:0005044|GO:0009650|GO:0006979|GO:0005794|GO:0000139|GO:0005783|GO:0005789|GO:0016021|GO:0016020	NP_878185	Scavenger receptor class A, member 3	1262.67	529.449	10.3908	8.95345
ASHG19A3A051972	2.40761	1.2676	2.40761	up	coding	NM_001042497	SLC12A6	RefSeq_coding	7457	chr15	-	34522197	34629045		AAAGAACAAAATGCATCCTCCAGAAACCACCACCAAGATGGCTTCAGTTCGGTTCATGGT	9990	Hs.510939	GO:0015379|GO:0015379|GO:0015293|GO:0005215|GO:0001525|GO:0006821|GO:0006811|GO:0006811|GO:0006813|GO:0006814|GO:0055085|GO:0030424|GO:0016323|GO:0016021|GO:0005886	NP_598408	Solute carrier family 12 (potassium/chloride transporters), member 6	168.725	78.5456	7.484	6.2164
ASHG19A3A039460	2.25249	1.17152	2.25249	up	coding	NM_152421	FAM69B	RefSeq_coding	2334	chr9	+	139607023	139619169		GTCAAGACAATCCATTCCATTCAAGACCAATTTACTCTCAAATTTTGCCAACACAGAAAT	138311	Hs.495480	GO:0016021|GO:0016020	NP_689634	Family with sequence similarity 69, member B	1948.29	979.907	11.0212	9.84964
ASHG19A3A052981	2.18249	1.12598	2.18249	up	coding	NM_178859	OSTBETA	RefSeq_coding	940	chr15	+	65337707	65345734		TATCCTGTTCTCCCATAAAGAGGAGGAAAAGGAAGATACAGAAATCGGTGCTGCTCCCAA	123264	Hs.534533	GO:0005215|GO:0016021|GO:0005886	NP_849190	Organic solute transporter beta	145.219	74.4135	7.26491	6.13894
ASHG19A3A053257	2.81231	1.49175	2.81231	up	coding	NM_013272	SLCO3A1	RefSeq_coding	5106	chr15	+	92396937	92709137		CCTGGTAAGATCATTGGATTTACAGAATACAAAAATGTACGGGATGGAATAAACCTAGAA	28232	Hs.311187	GO:0015347|GO:0005215|GO:0006811|GO:0043252|GO:0055085|GO:0016021|GO:0005886	NP_037404	Solute carrier organic anion transporter family, member 3A1	3972.58	1579.19	12.0319	10.5401
ASHG19A3A004538	2.34938	1.23228	2.34938	up	coding	NM_006704	SUGT1	RefSeq_coding	1705	chr13	+	53226830	53262433		CTAGAAACTTTTACAGAAGGACAAAAATTAGATAGTGCAGATGCTAATTTCAGTGTCTGG	10910	Hs.281902	GO:0005488|GO:0007067|GO:0000776|GO:0000151	NP_006695	SGT1, suppressor of G2 allele of SKP1 (S. cerevisiae)	2305.37	1107.07	11.2609	10.0286
ASHG19A3A049061	4.10487	2.03734	4.10487	up	coding	NM_001032731	OAS2	RefSeq_coding	2123	chr12	+	113416273	113426609		AGCACATCTGCACATTCCAATTTTAATGACAGCTCCTTAGAATTTCTTATCAACGAAGAC	4939	Hs.414332	GO:0005524|GO:0003723|GO:0000166|GO:0016779|GO:0016740|GO:0019221|GO:0006955|GO:0060333|GO:0006139|GO:0060337|GO:0005783|GO:0016020|GO:0005792|GO:0005739|GO:0005634	NP_058197	2'-5'-oligoadenylate synthetase 2, 69/71kDa	384.424	104.962	8.6793	6.64196
ASHG19A3A024208	2.17051	1.11803	2.17051	up	coding	NM_181806	AASDH	RefSeq_coding	3573	chr4	-	57204458	57253638		AGGAATTCGGGAAATTGGTCTCTACTGCCAACCTGGGATAGACTTACCCTCTTGGATTTT	132949	Hs.104347	GO:0005524|GO:0016878|GO:0000036|GO:0048037|GO:0016874|GO:0000166|GO:0006631|GO:0006629	NP_861522	Aminoadipate-semialdehyde dehydrogenase	709.389	369.997	9.55813	8.44009
ASHG19A3A013171	2.01908	1.0137	2.01908	up	coding	NM_207395	ZNF324B	RefSeq_coding	2995	chr19	+	58962970	58969199		CCACACCGGTGGTCTGGGCTGTGGCGCGCGGGTCGGGGCCCGAGGCGGGCGGCCAGGAAG	388569	Hs.186970	GO:0003677|GO:0046872|GO:0008270|GO:0006355|GO:0005622|GO:0005634	NP_997278	Zinc finger protein 324B	101.009	55.8157	6.73153	5.71783
ASHG19A3A052170	2.66651	1.41495	2.66651	up	coding	NM_130810	DYX1C1	RefSeq_coding	1993	chr15	-	55722507	55800432		GAATGAAGGCACATGTACGACGTGGAACAGCATTCTGTCAACTAGAATTGTATGTAGAAG	161582	Hs.126403	GO:0030331|GO:0005515|GO:0007399|GO:0001764|GO:0033146|GO:0061136|GO:0005737|GO:0005634	NP_570722	Dyslexia susceptibility 1 candidate 1	241.13	100.419	7.99583	6.58088
ASHG19A3A030237	3.37965	1.75688	3.37965	up	coding	NM_000735	CGA	RefSeq_coding	704	chr6	-	87795221	87804824		AATATGCAGCTATCTTTCTGGTCACATTGTCGGTGTTTCTGCATGTTCTCCATTCCGCTC	1081	Hs.119689	GO:0005179|GO:0007267|GO:0034641|GO:0032870|GO:0048589|GO:0046884|GO:0008406|GO:0042446|GO:0032275|GO:0046621|GO:0016486|GO:0007165|GO:0030878|GO:0006590|GO:0005576|GO:0005576|GO:0005625	NP_000726	Glycoprotein hormones, alpha polypeptide	582.757	194.791	9.27831	7.52144
ASHG19A3A001392	2.33547	1.22371	2.33547	up	coding	NM_001042370	TROVE2	RefSeq_coding	2091	chr1	+	193029003	193060904		CGGCTTTGATACTGGAGCTCTGGATCCTTGCAAAATACCCTACTAAATAAATCATTTTAG	6738	Hs.288178	GO:0003723|GO:0005515|GO:0006383|GO:0005737|GO:0005730|GO:0005634|GO:0030529	NP_004591	TROVE domain family, member 2	3871.43	1855.19	11.993	10.7693
ASHG19A3A028080	2.52665	1.33722	2.52665	up	coding	NM_024563	C5orf23	RefSeq_coding	2895	chr5	+	32788944	32791819		CAAGCAAGAATGCCACGTACTCAGAGTATAACAATGTGTTCTCATTAAAAAATACATCCC	79614	Hs.13528			Chromosome 5 open reading frame 23	744.76	333.629	9.63181	8.29458
ASHG19A3A030110	2.27593	1.18646	2.27593	up	coding	NM_005267	GJA8	RefSeq_coding	1377	chr1	+	147374945	147381393		AAGCCAAGGGCTATCAGCTCCTAGAAGAAGAGAAAATCGTTTCCCACTATTTCCCCTTGA	2703	Hs.632441	GO:0015267|GO:0007154|GO:0002088|GO:0006810|GO:0007601|GO:0030054|GO:0005922|GO:0005887|GO:0005886	NP_005258	Gap junction protein, alpha 8, 50kDa	268.935	132.653	8.15646	6.97
ASHG19A3A044001	2.25536	1.17336	2.25536	up	coding	NM_032199	ARID5B	RefSeq_coding	7948	chr10	+	63661442	63856703		GATTCATTCAGTGGTGTTAAGGATTCCAACAACAATTCCGATGGCAAAGCCGTTGCCAAG	84159	Hs.535297	GO:0003677|GO:0016564|GO:0060325|GO:0010761|GO:0001822|GO:0035264|GO:0048644|GO:0045892|GO:0006807|GO:0060021|GO:0048008|GO:0009791|GO:0048705|GO:0005622|GO:0005634	NP_115575	AT rich interactive domain 5B (MRF1-like)	913.166	457.418	9.91778	8.74442
ASHG19A3A054642	5.25048	2.39245	5.25048	up	coding	NM_002990	CCL22	RefSeq_coding	2918	chr16	+	57392717	57400099		ACAAATCACAGTGAGAATGTTCACCTTATAGGCTTGCTGTGGGGCTCAGGTTGAAAGTGT	6367	Hs.534347	GO:0008009|GO:0016477|GO:0007267|GO:0006935|GO:0006955|GO:0006954|GO:0009615|GO:0007165|GO:0005576|GO:0005615	NP_002981	Chemokine (C-C motif) ligand 22	683.075	146.486	9.50437	7.11192
ASHG19A3A018907	2.28719	1.19357	2.28719	up	coding	NM_005656	TMPRSS2	RefSeq_coding	3212	chr21	-	42836478	42880085		TAAGCAGGAGGCGGAGGCGGAGGCGGAGGGCGAGGGGCGGGGAGCGCCGCCTGGAGCGCG	7113	Hs.439309	GO:0008233|GO:0005044|GO:0004252|GO:0008236|GO:0006508|GO:0005737|GO:0005576|GO:0005887|GO:0005886	NP_005647	Transmembrane protease, serine 2	574.944	284.091	9.25993	8.06635
ASHG19A3A025963	14.1839	3.82618	14.1839	up	coding	NM_133477	SYNPO2	RefSeq_coding	7311	chr4	+	119809995	119982393		ACAATTATACACATTGGAAAGGGCCAACCTATTAGGGCTCAAGTATGTATATGCAAAAAA	171024	Hs.655519	GO:0071889|GO:0003779|GO:0051371|GO:0030018|GO:0005737|GO:0005634	NP_597734	Synaptopodin 2	10427.5	821.818	13.4206	9.5944
ASHG19A3A005104	2.31592	1.21158	2.31592	up	coding	NM_019595	ITSN2	RefSeq_coding	6031	chr2	-	24425734	24583397		CAGAAATGGATTCTTTTAACAATCAACTAAAGGAACTGAGAGAAACCTACAACACACAGC	50618	Hs.432562	GO:0005089|GO:0005070|GO:0005509|GO:0005515|GO:0006897|GO:0035023|GO:0005737|GO:0005622	NP_671494	Intersectin 2	283.92	137.943	8.23598	7.02439
ASHG19A3A035388	2.76607	1.46784	2.76607	up	coding	NM_198336	INSIG1	RefSeq_coding	2635	chr7	+	155089485	155101942		CTGTGAGGAGTTGAATTTGAAGACCACTTGGCTGTTTCACAAAACCAGAAGTAATTACAG	3638	Hs.520819	GO:0005515|GO:0030967|GO:0008283|GO:0006695|GO:0060363|GO:0042472|GO:0008152|GO:0042474|GO:0045599|GO:0045717|GO:0010894|GO:0060021|GO:0006991|GO:0008202|GO:0006641|GO:0005783|GO:0005789|GO:0016021|GO:0016020	NP_938151	Insulin induced gene 1	1286.66	527.636	10.4163	8.94845
ASHG19A3A026200	2.87508	1.5236	2.87508	up	coding	NM_001130684	GUCY1A3	RefSeq_coding	4573	chr4	+	156588814	156653500		AGCAGGGCTGGAGGCGGTGGCGGGCTTCAGGGCAACTTCACCCGGCCGGCTGCGGCGTGG	2982	Hs.24258	GO:0005525|GO:0004383|GO:0020037|GO:0000166|GO:0004872|GO:0008015|GO:0007596|GO:0006182|GO:0035556|GO:0007263|GO:0030168|GO:0005737|GO:0008074	NP_001124159	Guanylate cyclase 1, soluble, alpha 3	709.898	278.033	9.55905	8.03545
ASHG19A3A039770	2.1111	1.078	2.1111	up	coding	NM_001126054	CASK	RefSeq_coding	8229	chrX	-	41374190	41782287		TGTGTTTTGAAATCGTAAAGCGAGCTGACGCTGGTTTTGTGTACAGTGAAGCTGTAGCCA	8573	Hs.495984	GO:0005524|GO:0005516|GO:0004385|GO:0000166|GO:0005515|GO:0004674|GO:0016740|GO:0007155|GO:0006468|GO:0015629|GO:0005737|GO:0005634|GO:0005886	NP_003679	Calcium/calmodulin-dependent serine protein kinase (MAGUK family)	743.952	399.855	9.62993	8.55194
ASHG19A3A033982	2.18905	1.13031	2.18905	up	coding	NM_005738	ARL4A	RefSeq_coding	3162	chr7	+	12726960	12730556		TCCCTGCGTAGAAACGCCTGCCAATGCTTTCTCATTTGGACCCAGACTCCAGATCGGGAG	10124	Hs.245540	GO:0005525|GO:0000166|GO:0005515|GO:0050873|GO:0007264|GO:0005737|GO:0005622|GO:0005730|GO:0005634|GO:0005886	NP_997625	ADP-ribosylation factor-like 4A	398.585	205.723	8.73062	7.60031
CUST_34_PI426249100	2.03103	1.02221	2.03103	up	coding	NM_018952_Exon3-	NM_018952	HOX cluster	493	chr17	-	46675097	46675590	NM_018952,	AAGAGCAGAAGTGCTCCACTCCGGTCTACCCGTGGATGCAGCGGATGAATTCGTGCAACA						112.504	61.9356	6.89358	5.87137
ASHG19A3A005828	2.14024	1.09777	2.14024	up	coding	NM_134265	WSB1	RefSeq_coding	2411	chr17	+	25621105	25640645		CCGAGGGTCAACGAGAAAGAGATCGGAAAACTCCTCCTTAACTTGGTAGATCATACTGAA	26118	Hs.446017	GO:0005515|GO:0008150|GO:0035556|GO:0005622	NP_599027	WD repeat and SOCS box-containing 1	225.196	117.42	7.89654	6.79877
ASHG19A3A003720	2.17569	1.12148	2.17569	up	coding	NM_001173525	TROVE2	RefSeq_coding	2102	chr1	+	193029003	193060904		ACCATTGCAGACCCAGATGATAGAGACACTGTAAAATAGTTTTGCTTTGTTGAATAATAC	6738	Hs.288178	GO:0003723|GO:0005515|GO:0006383|GO:0005737|GO:0005730|GO:0005634|GO:0030529	NP_004591	TROVE domain family, member 2	647.191	337.085	9.42926	8.30778
ASHG19A3A031659	2.82306	1.49726	2.82306	up	coding	NM_152731	BEND6	RefSeq_coding	2727	chr6	+	56819772	56892138		AACTAACAAACACCCGGAAAGAAAACAGCCGACTTCGACAGTCTTTGGTCATGCTTCAAG	221336	Hs.582993		NP_689944	BEN domain containing 6	327.966	130.672	8.44737	6.95011
ASHG19A3A024886	2.78893	1.47971	2.78893	up	coding	NM_001039580	MAP9	RefSeq_coding	7333	chr4	-	156263813	156298122		CTCGCTCAGCCAGACAAAGGAGTTCTGAATACTCAGATGACTTTGACAGTGATGAGATTG	79884	Hs.61271	GO:0007049|GO:0051301|GO:0007067|GO:0005737|GO:0005856|GO:0005874|GO:0005819	NP_001034669	Microtubule-associated protein 9	156.551	62.8929	7.37503	5.89532
ASHG19A3A012124	3.281	1.71413	3.281	up	coding	NM_015318	ARHGEF18	RefSeq_coding	5252	chr19	+	7459998	7537370		GGCGGCTGCGAGAGTGGCAGAGGAGCTGGCGGAGAGCGGCCTGCGGGCGATCGGGCCGAG	23370	Hs.465761	GO:0005089|GO:0005085|GO:0005085|GO:0030036|GO:0006915|GO:0008624|GO:0048011|GO:0035023|GO:0008360|GO:0051056|GO:0007264|GO:0007264|GO:0005737|GO:0005829|GO:0005829|GO:0005622	NP_056133	Rho/Rac guanine nucleotide exchange factor (GEF) 18	163.492	55.9295	7.43508	5.72095
ASHG19A3A009092	3.05576	1.61153	3.05576	up	coding	NM_001141	ALOX15B	RefSeq_coding	2730	chr17	+	7942357	7952442		ATACACCCTGCACATCAACACACTCGCCCGGGAGCTGCTTATCGTGCCAGGGCAGGTGGT	247	Hs.111256	GO:0050473|GO:0005506|GO:0016165|GO:0046872|GO:0016491|GO:0006631|GO:0006917|GO:0019370|GO:0006629|GO:0045786|GO:0030336|GO:0008285|GO:0045926|GO:0055114|GO:0030850|GO:0030856|GO:0005737|GO:0005622	NP_001132	Arachidonate 15-lipoxygenase, type B	187.764	68.6554	7.63456	6.02303
ASHG19A3A048457	2.35448	1.23541	2.35448	up	coding	NM_005086	SSPN	RefSeq_coding	4547	chr12	+	26348505	26387706		ATGGCGAGCATCAGCTCCTCCCTGCTAGTCAGGGACACTCCATTTTGGGCTGGGATCATT	8082	Hs.183428	GO:0007155|GO:0006936|GO:0030054|GO:0016010|GO:0005887|GO:0045211|GO:0042383|GO:0045202|GO:0030133	NP_005077	Sarcospan (Kras oncogene-associated gene)	242.052	114.807	8.00155	6.76615
ASHG19A3A049821	2.12058	1.08446	2.12058	up	coding	NM_018011	ARGLU1	RefSeq_coding	1772	chr13	-	107195663	107220514		GAGCTAGAGCGAATACTGGAAGAGAATAACCGAAAAATTGCAGAAGCACAAGCCAAACTG	55082	Hs.728131		NP_060481	Arginine and glutamate rich 1	3242.59	1701.39	11.7364	10.6519
ASHG19A3A042619	2.6928	1.42911	2.6928	up	coding	NM_003591	CUL2	RefSeq_coding	2910	chr10	-	35298807	35379294		TGCTGTGTCCACTGGTTTACCTCATATGATTCAGGAGCTGCAAAACCACATCCATGATGA	8453	Hs.82919	GO:0005515|GO:0031625|GO:0000082|GO:0007050|GO:0008629|GO:0044419|GO:0008285|GO:0030163|GO:0006511|GO:0031461	NP_003582	Cullin 2	1064.54	446.58	10.1397	8.71061
ASHG19A3A032131	2.1373	1.09579	2.1373	up	coding	NM_004952	EFNA3	RefSeq_coding	1782	chr1	+	155051347	155060006		CCTGGGCCTTTTTCAAGTGCTTTGGCTGTGACTTTCATACTCTGCTCTTAGTCTAAAAAA	1944	Hs.516656	GO:0046875|GO:0005005|GO:0007267|GO:0031225|GO:0005887|GO:0005886	NP_004943	Ephrin-A3	14094.5	7306.37	13.8515	12.7558
ASHG19A3A036602	2.68215	1.42339	2.68215	up	coding	NM_018967	SNTG1	RefSeq_coding	1889	chr8	+	50824596	51705427		ATTTTGATGATCCAGGAACAGGATGTGATATGTGTGTCTGGTGAGCCTTTCTATTCTGGT	54212	Hs.584914	GO:0003779|GO:0008022|GO:0007154|GO:0005737|GO:0005856|GO:0005634|GO:0032587|GO:0016013	NP_061840	Syntrophin, gamma 1	139.092	58.2135	7.20226	5.77887
ASHG19A3A034626	2.58168	1.36831	2.58168	up	coding	NM_002069	GNAI1	RefSeq_coding	3318	chr7	+	79764139	79848725		TGGTGTACAAGCCTGTTTCAACAGATCCCGAGAGTACCAGCTTAATGATTCTGCAGCATA	2770	Hs.134587	GO:0031683|GO:0005525|GO:0003924|GO:0003924|GO:0003924|GO:0019001|GO:0031821|GO:0000166|GO:0005515|GO:0004871|GO:0007186|GO:0006184|GO:0006184|GO:0006184|GO:0007596|GO:0051301|GO:0007193|GO:0030168|GO:0007165|GO:0007268|GO:0005813|GO:0005737|GO:0031234|GO:0005834|GO:0005622|GO:0030496|GO:0005886|GO:0005886|GO:0005886	NP_002060	Guanine nucleotide binding protein (G protein), alpha inhibiting activity polypeptide 1	591.24	258.755	9.29985	7.93154
ASHG19A3A005725	2.07012	1.04971	2.07012	up	coding	NM_080594	RNPS1	RefSeq_coding	1963	chr16	-	2303120	2318114		AAAGCAGGAGGAGGTGGCGGCGGCGGGAAGATGCTGCTCTTTGGCGTAAATTGCAATCGA	10921	Hs.355643	GO:0003723|GO:0000166|GO:0005515|GO:0008380|GO:0010467|GO:0031124|GO:0006406|GO:0000398|GO:0000184|GO:0006369|GO:0006366|GO:0005737|GO:0005829|GO:0016607|GO:0005654|GO:0005634	NP_542161	RNA binding protein S1, serine-rich domain	1090.44	597.344	10.1768	9.12714
ASHG19A3A043202	2.11828	1.08289	2.11828	up	coding	NM_001100626	ERLIN1	RefSeq_coding	3206	chr10	-	101909847	101945814		GGGCCGGCTGTTGGCGGCGGTTGGCTCGGCGCGGGAGTCGGCTGCACGTGCGGGCGGGGG	10613	Hs.150087	GO:0005515|GO:0030433|GO:0005783|GO:0005789|GO:0016021|GO:0016020	NP_006450	ER lipid raft associated 1	129.844	68.5773	7.10437	6.02148
ASHG19A3A006980	2.05376	1.03827	2.05376	up	coding	NM_203499	DDX42	RefSeq_coding	3943	chr17	+	61851566	61896676		GCTGCCGCTGCAGCCATAGCAGCAGGTCAGTCATTGGCACCATGAACTGGAATAAAGGTG	11325	Hs.702010	GO:0005524|GO:0008026|GO:0003723|GO:0004386|GO:0016787|GO:0000166|GO:0005515|GO:0008104|GO:0045767|GO:0015030|GO:0005737|GO:0016607|GO:0005730|GO:0005634	NP_987095	DEAD (Asp-Glu-Ala-Asp) box polypeptide 42	110.546	60.1441	6.86605	5.82778
ASHG19A3A012221	2.43333	1.28293	2.43333	up	coding	NM_003072	SMARCA4	RefSeq_coding	5703	chr19	+	11071597	11172959	NM_001128844,	TCGTTTGGCGGCGGCGGCGGCTTCTTTGTTTCGTGAAGAGAAGCGAGACGCCCATTCTGC	6597	Hs.327527	GO:0005524|GO:0003677|GO:0008094|GO:0050681|GO:0004386|GO:0070577|GO:0016818|GO:0042802|GO:0000166|GO:0002039|GO:0047485|GO:0005515|GO:0016563|GO:0003714|GO:0006338|GO:0045749|GO:0060766|GO:0032582|GO:0010553|GO:0007399|GO:0010552|GO:0051091|GO:0045944|GO:0016514|GO:0071778|GO:0071565|GO:0071564|GO:0005634	NP_003063	SWI/SNF related, matrix associated, actin dependent regulator of chromatin, subfamily a, member 4	146.189	67.2274	7.27364	5.99071
ASHG19A3A025680	6.51607	2.704	6.51607	up	coding	NM_001511	CXCL1	RefSeq_coding	1119	chr4	+	74735108	74736953		GGTAGTTTTACAGTGTTTCTGGCTTAGAACAAAGGGGCTTAATTATTGATGTTTTCATAG	2919	Hs.789	GO:0008009|GO:0008047|GO:0008083|GO:0005102|GO:0007186|GO:0030036|GO:0008283|GO:0006935|GO:0006955|GO:0006954|GO:0035556|GO:0008285|GO:0007399|GO:0007165|GO:0005576|GO:0005576|GO:0005615	NP_001502	Chemokine (C-X-C motif) ligand 1 (melanoma growth stimulating activity, alpha)	318.302	55.1323	8.40331	5.69931
ASHG19A3A001212	3.20107	1.67855	3.20107	up	coding	NM_001033559	DYX1C1	RefSeq_coding	1887	chr15	-	55722507	55800432		AACTTACACAAGGCTATTGAAGATTCTTCTAAGGCCTACAGGATTATGAAGCGGCACTTA	161582	Hs.126403	GO:0030331|GO:0005515|GO:0007399|GO:0001764|GO:0033146|GO:0061136|GO:0005737|GO:0005634	NP_570722	Dyslexia susceptibility 1 candidate 1	277.669	96.7412	8.2045	6.52595
ASHG19A3A053091	2.18093	1.12494	2.18093	up	coding	NM_153271	SNX33	RefSeq_coding	3250	chr15	+	75941347	75950966		TGTGGAGGACCCCACAAAACAGACCAAATTCAAGGGCATCAAAAGCTACATCTCCTACAA	257364	Hs.8705	GO:0035091|GO:0005515|GO:0007154	NP_695003	Sorting nexin 33	135.044	69.2068	7.15905	6.03411
ASHG19A3A010357	4.10553	2.03757	4.10553	up	coding	NM_000633	BCL2	RefSeq_coding	6492	chr18	-	60790578	60986613		CTTTGTTTGTGTTGTTGGAAAAAGTCACATTGCCATTAAACTTTCCTTGTCTGTCTAGTT	596	Hs.150749	GO:0051434|GO:0042802|GO:0002020|GO:0005515|GO:0046982|GO:0042803|GO:0051721|GO:0043565|GO:0016563|GO:0008134|GO:0001782|GO:0002326|GO:0042100|GO:0050853|GO:0043375|GO:0000082|GO:0033077|GO:0043029|GO:0002360|GO:0007015|GO:0008633|GO:0008633|GO:0006916|GO:0006915|GO:0070059|GO:0031103|GO:0001662|GO:0001658|GO:0007569|GO:0008219|GO:0000902|GO:0016337|GO:0021747|GO:0051607|GO:0048589|GO:0048546|GO:…	NP_000648	B-cell CLL/lymphoma 2	3084.78	842.594	11.6657	9.62811
ASHG19A3A005255	2.31842	1.21314	2.31842	up	coding	NM_022138	SMOC2	RefSeq_coding	3150	chr6	+	168841830	169068673		CAACGCGAAGGCACAGGAAAAACAGTCTCCTTGCAAATCTTTTCCGTTCTGAATTCAGAT	64094	Hs.487200	GO:0005509|GO:0007165|GO:0005604|GO:0005576	NP_071421	SPARC related modular calcium binding 2	140.359	67.6595	7.21406	6.00092
ASHG19A3A014754	7.41879	2.89118	7.41879	up	coding	NM_006287	TFPI	RefSeq_coding	3927	chr2	-	188328959	188419219		GTGGGGGAAATGAAAACAATTTTACTTCCAAACAAGAATGTCTGAGGGCATGTAAAAAAG	7035	Hs.516578	GO:0004866|GO:0004867|GO:0007596|GO:0007598|GO:0010951|GO:0005576|GO:0005615|GO:0005886	NP_006278	Tissue factor pathway inhibitor (lipoprotein-associated coagulation inhibitor)	9577.72	1440.86	13.2971	10.406
ASHG19A3A019017	2.08635	1.06098	2.08635	up	coding	NM_000911	OPRD1	RefSeq_coding	1774	chr1	+	29138653	29190208		TCCATCGACTACTACAATATGTTCACCAGCATCTTCACGCTCACCATGATGAGTGTTGAC	4985	Hs.372	GO:0004930|GO:0004986|GO:0005515|GO:0004872|GO:0007186|GO:0007187|GO:0008344|GO:0071363|GO:0006955|GO:0007193|GO:0051927|GO:0007218|GO:0000060|GO:0051930|GO:0043679|GO:0005737|GO:0032590|GO:0005887|GO:0005624|GO:0045121|GO:0005886|GO:0005886|GO:0045211|GO:0031982	NP_000902	Opioid receptor, delta 1	103.588	55.5587	6.77199	5.71101
ASHG19A3A017475	2.47908	1.3098	2.47908	up	coding	NM_130794	CST11	RefSeq_coding	553	chr20	-	23431040	23433482		TGGAAATGCAGTGGACCACCTGCCAAAAGCCAGAGACCACGAACTGTGTCCCCCAGGAAA	140880	Hs.128100	GO:0004869|GO:0030414|GO:0042742|GO:0005737|GO:0005634	NP_570612	Cystatin 11	162.834	73.5211	7.42992	6.12011
ASHG19A3A024476	2.15957	1.11075	2.15957	up	coding	NM_003838	FPGT	RefSeq_coding	3426	chr1	+	74663925	74673120		ATTCAAACTCTTCAGCACTTTCAGAGCTATTGATATGCATATGTCCACCTAGTACCATCT	8790	Hs.480085	GO:0005525|GO:0003824|GO:0047341|GO:0000166|GO:0016779|GO:0016740|GO:0006004|GO:0005737	NP_003829	Fucose-1-phosphate guanylyltransferase	139.991	72.5753	7.21097	6.10022
ASHG19A3A030261	2.16949	1.11735	2.16949	up	coding	NM_021244	RRAGD	RefSeq_coding	4926	chr6	-	90074336	90121995		AGGTGACAAAGTTCCTGGCTCTCGTTTGCTTTGTCAGAGAGGAAAGCTTTGAAAGAAAAG	58528	Hs.31712	GO:0005525|GO:0000166|GO:0005515|GO:0046982|GO:0034613|GO:0071230|GO:0032008|GO:0005737|GO:0005764|GO:0005634	NP_067067	Ras-related GTP binding D	2406.95	1251.94	11.3199	10.2026
ASHG19A3A040670	2.11558	1.08105	2.11558	up	coding	NM_005647	TBL1X	RefSeq_coding	5715	chrX	+	9433200	9687779		GCGCCCTCAGGCCGCCATTCGCCACCGAAACTTTCCAGCGCCCGCGCTCTCTCCGGGACT	6907	Hs.495656	GO:0008013|GO:0042393|GO:0010843|GO:0008022|GO:0005515|GO:0019904|GO:0016563|GO:0003714|GO:0003714|GO:0008134|GO:0060070|GO:0044255|GO:0010553|GO:0045944|GO:0043161|GO:0006508|GO:0007605|GO:0000118|GO:0005654|GO:0005634|GO:0005876|GO:0017053	NP_005638	Transducin (beta)-like 1X-linked	305.752	163.189	8.34884	7.26779
ASHG19A3A040907	2.35907	1.23822	2.35907	up	coding	NM_003334	UBA1	RefSeq_coding	3616	chrX	+	47053200	47074526		CGGGCTTGGCTTCGGCTCCTTGAGGAGTTGGCGGCGGCGCGACCCGGGGAACCGGCATTG	7317	Hs.533273	GO:0005524|GO:0016874|GO:0000166|GO:0005515|GO:0008641|GO:0008219|GO:0006464	NP_695012	Ubiquitin-like modifier activating enzyme 1	150.142	71.3485	7.31566	6.07744
ASHG19A3A050239	2.08763	1.06186	2.08763	up	coding	NM_001146071	TDRD3	RefSeq_coding	3032	chr13	+	60970590	61148012		TGTGGGCGCTGCAAACGCCACACTTTTGCTCTACGAAGAACCTCCTCGCGACTTTCCAAG	81550	Hs.525061	GO:0003682|GO:0035064|GO:0003676|GO:0003713|GO:0016568|GO:0005737|GO:0005634	NP_110421	Tudor domain containing 3	163.903	87.7634	7.43894	6.37707
ASHG19A3A029117	2.14923	1.10382	2.14923	up	coding	NM_006623	PHGDH	RefSeq_coding	2021	chr1	+	120254418	120286848		TTTGAGTATTTCCGTCCAATCAAAAGGAGACTGTAAGAGGAGGAGGAGGAGGAGATGACT	26227	Hs.487296	GO:0051287|GO:0048037|GO:0009055|GO:0016491|GO:0004617|GO:0006564|GO:0007420|GO:0008652|GO:0055114	NP_006614	Phosphoglycerate dehydrogenase	608.433	320.045	9.3391	8.23528
ASHG19A3A021773	4.00154	2.00055	4.00154	up	coding	NM_023915	GPR87	RefSeq_coding	1521	chr3	-	151011875	151034636		TGCTTACAGTGCATCACAACTGAAGAATGGGGTTCAACTTGACGCTTGCAAAATTACCAA	53836	Hs.591292	GO:0004930|GO:0045028|GO:0004872|GO:0008150|GO:0016021|GO:0005886	NP_076404	G protein-coupled receptor 87	714.542	201.126	9.56644	7.56589
ASHG19A3A031790	9.11978	3.189	9.11978	up	coding	NM_002526	NT5E	RefSeq_coding	4087	chr6	+	86159301	86205496		ATTGCACTGGGACATTCGGGTTTTGAAATGGATAAACTCATCGCTCAGAAAGTGAGGGGT	4907	Hs.153952	GO:0008253|GO:0008198|GO:0016788|GO:0046872|GO:0000166|GO:0006196|GO:0006259|GO:0046086|GO:0050728|GO:0055086|GO:0006144|GO:0006164|GO:0006195|GO:0006206|GO:0046135|GO:0031225|GO:0005737|GO:0005624|GO:0005886|GO:0005886	NP_002517	5'-nucleotidase, ecto (CD73)	1528.54	188.221	10.6607	7.47166
ASHG19A3A038247	2.1864	1.12856	2.1864	up	coding	NM_004669	CLIC3	RefSeq_coding	813	chr9	-	139889059	139891024		AGGGAGTCCAACACCGCCGGCAACGACGTTTTCCACAAGTTCTCCGCGTTCATCAAGAAC	9022	Hs.64746	GO:0005254|GO:0005515|GO:0005247|GO:0005244|GO:0006821|GO:0006811|GO:0007165|GO:0034707|GO:0005737|GO:0016021|GO:0016020|GO:0005634	NP_004660	Chloride intracellular channel 3	5906.15	3038.47	12.6114	11.4829
ASHG19A3A046488	2.66923	1.41642	2.66923	up	coding	NM_006133	DAGLA	RefSeq_coding	5756	chr11	+	61447909	61514472		TTTAGAAAACAAGACAGACTCTCAGATGAAAGATCTGACAAGCACCGTGGCCAGTCACAG	747	Hs.241564	GO:0047372|GO:0016787|GO:0046872|GO:0004806|GO:0007596|GO:0016042|GO:0030168|GO:0016021|GO:0005886	NP_006124	Diacylglycerol lipase, alpha	199.225	83.5717	7.72212	6.3057
ASHG19A3A044987	2.23873	1.16268	2.23873	up	coding	NM_004179	TPH1	RefSeq_coding	1815	chr11	-	18042083	18062335		TCTTAGGTCATGTCCCGCTTTTGGCTGAACCTAGTTTTGCCCAATTCTCCCAAGAAATTG	7166	Hs.591999	GO:0016597|GO:0005506|GO:0046872|GO:0004510|GO:0009072|GO:0046849|GO:0034641|GO:0042446|GO:0060749|GO:0055114|GO:0006950|GO:0042427|GO:0005829|GO:0043005	NP_004170	Tryptophan hydroxylase 1	649.348	327.815	9.43379	8.27111
ASHG19A3A044749	2.07522	1.05326	2.07522	up	coding	NM_001170820	LOC402778	RefSeq_coding	1104	chr11	-	1756030	1769349		TGTGACCCCGCTCAGAGCCCTTGTGTCTGTGAACTTTCAATGAAATACCCATGCAGCTCC	402778	Hs.121575	GO:0009607|GO:0016021|GO:0005886	NP_001164291	CD225 family protein FLJ76511	42963.5	22470.7	15.4323	14.379
ASHG19A3A048091	2.1351	1.09431	2.1351	up	coding	NM_025157	PXN	RefSeq_coding	3834	chr12	-	120648249	120687957		CAGTGGATGTGCAGTTTCTTCACCCCTGCTTAGCTTCATCAGGCACAATGCGTCTTTGAG	5829	Hs.446336	GO:0051435|GO:0008013|GO:0046872|GO:0005515|GO:0017166|GO:0008270|GO:0000187|GO:0048754|GO:0007155|GO:0034329|GO:0006928|GO:0034614|GO:0007010|GO:0007173|GO:0048041|GO:0030032|GO:0006936|GO:0018108|GO:0007172|GO:0007165|GO:0030054|GO:0005737|GO:0005856|GO:0005925|GO:0030027|GO:0005875|GO:0005886|GO:0005886|GO:0005886	NP_079433	Paxillin	199.477	104.177	7.72444	6.63014
ASHG19A3A003001	2.37768	1.24955	2.37768	up	coding	NM_001159495	BANF2	RefSeq_coding	390	chr20	+	17674319	17716517		AAGCAACCCTGCGCTGAATGCTGCGAGGAACAAAGGAGATGGACAACATGTCTCCCAGGC	140836	Hs.115366	GO:0003677|GO:0005737|GO:0005634	NP_848572	Barrier to autointegration factor 2	163.312	76.8646	7.43386	6.18431
ASHG19A3A041437	2.3923	1.2584	2.3923	up	coding	NM_007231	SLC6A14	RefSeq_coding	4537	chrX	+	115567773	115592623		TTACCTGCATCAACGGCAGTGAAATTTATCAGCCAGGGCAGCTTCCCAGTGAACAATATT	11254	Hs.522109	GO:0015171|GO:0005328|GO:0015293|GO:0003333|GO:0006865|GO:0006520|GO:0034641|GO:0006811|GO:0006836|GO:0009636|GO:0055085|GO:0006810|GO:0031526|GO:0016021|GO:0005887|GO:0005886	NP_009162	Solute carrier family 6 (amino acid transporter), member 14	3123.03	1455.84	11.6816	10.4232
ASHG19A3A006216	2.28622	1.19296	2.28622	up	coding	NM_153282	HYAL1	RefSeq_coding	1985	chr3	-	50337320	50341004		CACGACAAACCACTTTCTGCCCCTGGAATCATGTCAGGCCATCAAGGAGTATATGGACAC	3373	Hs.75619	GO:0004415|GO:0016798|GO:0005975|GO:0008219|GO:0030214|GO:0008285|GO:0005737|GO:0005576|GO:0005615|GO:0005764	NP_695017	Hyaluronoglucosaminidase 1	131.695	64.4431	7.12418	5.93122
ASHG19A3A005695	2.03628	1.02593	2.03628	up	coding	NM_057090	ARTN	RefSeq_coding	1961	chr1	+	44398991	44402911	NM_001136215,	CCACTGCCCCTGGCCTAGGCAGCAGGCTCCACTTGGTCTCTCCGCGCAGCCTGCCCTGTG	9048	Hs.632404	GO:0008083|GO:0005102|GO:0007411|GO:0007405|GO:0007165|GO:0005576	NP_476432	Artemin	370.971	206.133	8.62901	7.60307
ASHG19A3A019016	2.30768	1.20644	2.30768	up	coding	NM_001001438	LSS	RefSeq_coding	2692	chr21	-	47608360	47648738		GTGCAGCCTCTGTCTGAGGGGGATATTTGCCTCAGTGTGATTAAAAATCAGTCATGAAAG	4047	Hs.596543	GO:0016866|GO:0000250|GO:0006695|GO:0006695|GO:0006694|GO:0008202|GO:0005783|GO:0005789|GO:0016020	NP_002331	Lanosterol synthase (2,3-oxidosqualene-lanosterol cyclase)	1890.6	928.256	10.9755	9.76904
ASHG19A3A043353	2.13461	1.09397	2.13461	up	coding	NM_153810	C10orf46	RefSeq_coding	6758	chr10	-	120440493	120514758	AK097728,	TTCAGGTCACACCTTCAACTATGGCAAATATTGTGAAAGGCCTGTATACCCTCAGACCAG	143384	Hs.604614	GO:0031625|GO:0006511|GO:0031461	NP_722517	Chromosome 10 open reading frame 46	356.106	188.468	8.56737	7.4734
ASHG19A3A002203	2.10899	1.07655	2.10899	up	coding	NM_001130858	PPIP5K1	RefSeq_coding	5700	chr15	-	43825659	43882430		TGAGTCTGTCAACAAGCTGCATCCCCTCTGTTATCTCAGGTACTCCCGAGGCGTGCTCTC	9677	Hs.156814	GO:0005524|GO:0003993|GO:0033857|GO:0000827|GO:0000832|GO:0016301|GO:0000166|GO:0016740|GO:0006020|GO:0005737|GO:0005829	NP_055474	Diphosphoinositol pentakisphosphate kinase 1	1839.13	985.687	10.9373	9.86073
ASHG19A3A051302	2.30025	1.20179	2.30025	up	coding	NM_005794	DHRS2	RefSeq_coding	1692	chr14	+	24105572	24114846		AAGGACATCCGGGTAAACTGCGTGGTTCCAGGAATTATCAAAACTGACTTCAGCAAAGTG	10202	Hs.272499	GO:0005488|GO:0004090|GO:0016491|GO:0008207|GO:0034599|GO:0043011|GO:0043066|GO:0008285|GO:0055114|GO:0009636|GO:0005737|GO:0005739|GO:0005635|GO:0005634	NP_878912	Dehydrogenase/reductase (SDR family) member 2	1341.63	659.528	10.4756	9.27383
ASHG19A3A037581	2.23803	1.16223	2.23803	up	coding	NM_001177311	TRPM6	RefSeq_coding	8277	chr9	-	77337410	77502263		TCCCCGTGCGCCCAGTGTTCCCCGTGCAGGAGTCCCGGAGCGATGACAGCGCCGGTTACG	140803	Hs.272225	GO:0005524|GO:0005262|GO:0005216|GO:0016301|GO:0046872|GO:0000166|GO:0004674|GO:0016740|GO:0006811|GO:0006468|GO:0009636|GO:0055085|GO:0016021|GO:0016020	NP_060132	Transient receptor potential cation channel, subfamily M, member 6	164.297	81.9893	7.44247	6.28024
ASHG19A3A027576	2.05763	1.04098	2.05763	up	coding	NM_030953	TIGD6	RefSeq_coding	3508	chr5	-	149372684	149380217		TCCCCCTGCTTCAGGTTAATTTTTTGGATATTTCAGAAACCCATAGCAATTCAGTGATTT	81789	Hs.169333	GO:0003677|GO:0000775|GO:0005634	NP_112215	Tigger transposable element derived 6	526.046	289.626	9.1355	8.09451
ASHG19A3A035190	4.58219	2.19604	4.58219	up	coding	NM_001001656	OR9A4	RefSeq_coding	945	chr7	+	141618675	141619620		AGTAACTCCTTTCCTCAATCCTTTCATCTTCACCCTCCGGAATGATAAAGTCATAGAGGC	130075	Hs.690171	GO:0004984|GO:0004872|GO:0050896|GO:0007608|GO:0016021|GO:0005886	NP_001001656	Olfactory receptor, family 9, subfamily A, member 4	676.334	166.162	9.48969	7.29365
ASHG19A3A003164	2.18662	1.1287	2.18662	up	coding	NM_001163437	TBCK	RefSeq_coding	3424	chr4	-	106967232	107237423		GTATCCCTCGTACTTGGCCCCTGAGGGAAGAAAATTATTTCAGAGCTTGGATATTTCTGA	93627	Hs.292986	GO:0005524|GO:0005097|GO:0004672|GO:0006468|GO:0032313|GO:0005622	NP_149106	TBC1 domain containing kinase	326.472	168.73	8.4417	7.313
ASHG19A3A027389	2.11036	1.07749	2.11036	up	coding	NM_001098813	SEPT8	RefSeq_coding	4270	chr5	-	132091696	132113561		ACTAGGCTGCCGCGGCCTCTCCCGGATCCGACGGGTCTCCCGCAGCTTGTCCACACTCTG	23176	Hs.522057	GO:0005525|GO:0000166|GO:0005515|GO:0007049|GO:0005737|GO:0005856|GO:0031105	NP_055961	Septin 8	496.811	266.624	9.0549	7.97741
ASHG19A3A053874	2.01928	1.01384	2.01928	up	coding	NM_001040146	CHTF8	RefSeq_coding	2898	chr16	-	69151911	69166062		AAGGGTGGCCGAGCGCGGGCGGAGGACGGAGAAGGGGGCGGCGAGGGCCGGAATCTCGAG	54921	Hs.85962	GO:0003677|GO:0006260|GO:0007049|GO:0005634	NP_001035236	CTF8, chromosome transmission fidelity factor 8 homolog (S. cerevisiae)	624.664	350.609	9.37565	8.36181
ASHG19A3A005490	2.11898	1.08337	2.11898	up	coding	NM_032019	HDAC10	RefSeq_coding	2720	chr22	-	50683614	50689834		CCTGCTGCTCCCACTGGCCTTTGAGTTTGACCCTGAGCTGGTGCTGGTCTCGGCAGGATT	83933	Hs.26593	GO:0032041|GO:0046969|GO:0046970|GO:0019899|GO:0004407|GO:0034739|GO:0042826|GO:0016787|GO:0005515|GO:0033558|GO:0016566|GO:0016564|GO:0016568|GO:0016575|GO:0000122|GO:0006476|GO:0006355|GO:0005737|GO:0000118|GO:0005654|GO:0005634	NP_114408	Histone deacetylase 10	678.045	361.712	9.49288	8.40951
ASHG19A3A046743	2.23903	1.16288	2.23903	up	coding	NM_021200	PLEKHB1	RefSeq_coding	2391	chr11	+	73357222	73373862	NM_001130033,	AGCCTCCCACTTGGTAGCACCTTCCTGATCCCCTTATCTCTAAGGCGCTCAGGGAAATGC	58473	Hs.445489	GO:0008022|GO:0042803|GO:0004871|GO:0007275|GO:0007602|GO:0007165|GO:0005737|GO:0016021|GO:0016020	NP_067023	Pleckstrin homology domain containing, family B (evectins) member 1	603.236	304.519	9.32695	8.16407
ASHG19A3A044995	2.09949	1.07004	2.09949	up	coding	NM_181507	HPS5	RefSeq_coding	4880	chr11	-	18300216	18343721		TACCAGAGTCCTACAGCCATGTTCTTGCAGAGTTTGAATCTCTGGATCCATTACTCTCAG	11234	Hs.437599	GO:0007596|GO:0006996|GO:0043473|GO:0005737|GO:0005829	NP_852609	Hermansky-Pudlak syndrome 5	175.477	93.3394	7.53969	6.46965
ASHG19A3A003673	4.07485	2.02675	4.07485	up	coding	NM_001172665	RAB40C	RefSeq_coding	2587	chr16	+	640076	679273	NM_021168,NM_001172664,NM_001172663,	CCGCTGGATCAAGGAGATCGATGAGCATGCACCCGGAGTCCCCCGGATCTTGGTTGGAAA	57799	Hs.459630	GO:0019003|GO:0005525|GO:0000166|GO:0015031|GO:0007264|GO:0048471|GO:0005886	NP_066991	RAB40C, member RAS oncogene family	393.328	108.187	8.71176	6.68502
ASHG19A3A003736	2.45659	1.29666	2.45659	up	coding	NM_001174065	FGFR1	RefSeq_coding	5215	chr8	-	38268656	38325363	NM_001174067,	GAAACAGATAACACCAAACCAAACCCCGTAGCTCCATATTGGACATCCCCAGAAAAGATG	2260	Hs.264887	GO:0005524|GO:0050839|GO:0005007|GO:0005007|GO:0005007|GO:0001948|GO:0008201|GO:0000166|GO:0005515|GO:0032403|GO:0042803|GO:0004713|GO:0004713|GO:0004872|GO:0016740|GO:0000165|GO:0001525|GO:0007411|GO:0060445|GO:0016049|GO:0048469|GO:0021954|GO:0002062|GO:0030326|GO:0008543|GO:0008543|GO:0008543|GO:0008543|GO:0008543|GO:0008543|GO:0048699|GO:0001701|GO:0042472|GO:0008286|GO:0060484|GO:0048762|GO:…	NP_075598	Fibroblast growth factor receptor 1	238.065	107.683	7.97625	6.67959
ASHG19A3A001593	2.38114	1.25165	2.38114	up	coding	NM_001081637	LILRB1	RefSeq_coding	2802	chr19	+	55141967	55149002		GGATGGGGTGGAGATGGACACTCGGCAGAGCCCACACGATGAAGACCCCCAGGCAGTGAC	10859	Hs.667388	GO:0008157|GO:0004872|GO:0050776|GO:0009615|GO:0016021|GO:0005886	NP_006660	Leukocyte immunoglobulin-like receptor, subfamily B (with TM and ITIM domains), member 1	156.163	73.5193	7.37171	6.12006
ASHG19A3A009050	2.25183	1.1711	2.25183	up	coding	NM_000747	CHRNB1	RefSeq_coding	2437	chr17	+	7348405	7360931		AACAGATGAATATTTCATCCGGAAGCCGCCAAGTGATTTTCTCTTCCCCAAACCCAATAG	1140	Hs.330386	GO:0042166|GO:0015464|GO:0015267|GO:0005230|GO:0015276|GO:0004889|GO:0004872|GO:0035095|GO:0006812|GO:0006936|GO:0048747|GO:0050877|GO:0007274|GO:0001941|GO:0042391|GO:0007165|GO:0007271|GO:0030054|GO:0005887|GO:0005892|GO:0005886|GO:0045211|GO:0045202	NP_000738	Cholinergic receptor, nicotinic, beta 1 (muscle)	273.326	136.421	8.18047	7.00937
ASHG19A3A027025	2.08953	1.06318	2.08953	up	coding	NM_001004441	ANKRD34B	RefSeq_coding	3952	chr5	-	79852574	79866304		TTCAGAATAGACCTCTGAGTTGGGACCCAAGCTGTCAACTGATCCCAAATTCCTAAGTTC	340120	Hs.519404	GO:0005737|GO:0005634	NP_001004441	Ankyrin repeat domain 34B	115.138	61.6363	6.92579	5.86262
ASHG19A3A006761	2.13564	1.09467	2.13564	up	coding	NM_198220	SNRPB2	RefSeq_coding	1181	chr20	+	16710628	16722037		TTACAGTAGTCGGCGTAGGCCTTAGATTTTTTACTGTCTCCTGAAGAATTTAACACAAAC	6629	Hs.280378	GO:0003723|GO:0000166|GO:0005515|GO:0008380|GO:0010467|GO:0006397|GO:0000398|GO:0000398|GO:0005686|GO:0071013|GO:0005654|GO:0005634|GO:0005681	NP_937863	Small nuclear ribonucleoprotein polypeptide B	1589.63	841.303	10.7201	9.62542
ASHG19A3A000552	2.17457	1.12073	2.17457	up	coding	NM_000246	CIITA	RefSeq_coding	4654	chr16	+	10971054	11018839		CCTTTTCCTCCCTGCAGCATCTGGACCTGGATGCGCTGAGTGAGAACAAGATCGGGGACG	4261	Hs.701991	GO:0005524|GO:0003677|GO:0003702|GO:0033613|GO:0000166|GO:0010843|GO:0008022|GO:0005515|GO:0032403|GO:0016563|GO:0003713|GO:0016564|GO:0019221|GO:0006955|GO:0060333|GO:0032966|GO:0010553|GO:0045345|GO:0045348|GO:0010552|GO:0045944|GO:0046677|GO:0034341|GO:0005634	NP_000237	Class II, major histocompatibility complex, transactivator	204.809	105.028	7.76342	6.64269
ASHG19A3A005714	2.31598	1.21162	2.31598	up	coding	NM_079421	CDKN2D	RefSeq_coding	1162	chr19	-	10677138	10679655		CCCCGCCCGGCGAGGAGGAGGGAGGGCCGCCAGTGTCGACATGCTGCTGGAGGAGGTTCG	1032	Hs.435051	GO:0004861|GO:0019901|GO:0000731|GO:0000080|GO:0000082|GO:0006916|GO:0048102|GO:0007050|GO:0000278|GO:0043154|GO:0030308|GO:0008285|GO:0042326|GO:0000079|GO:0009411|GO:0032526|GO:0033280|GO:0005737|GO:0005829|GO:0005634	NP_524145	Cyclin-dependent kinase inhibitor 2D (p19, inhibits CDK4)	131.183	63.3632	7.1185	5.90688
ASHG19A3A031807	2.00259	1.00187	2.00259	up	coding	NM_001031743	C6orf165	RefSeq_coding	2215	chr6	+	88117689	88174191		TTCAATATCGGGGATTTTGTGCTTACACGTTTGCTGCAACAGATGGTCTTCTCCTTCCAG	154313	Hs.82921		NP_001026913	Chromosome 6 open reading frame 165	624.525	353.012	9.37476	8.37289
ASHG19A3A049059	4.66404	2.22158	4.66404	up	coding	NM_016816	OAS1	RefSeq_coding	1673	chr12	+	113344738	113357711		CCAGGAGGTATCAGAAATATGGTTACATTGGAACACATGAGTACCCTCATTTCTCTCATA	4938	Hs.524760	GO:0005524|GO:0003723|GO:0000166|GO:0016779|GO:0016740|GO:0019221|GO:0006955|GO:0060333|GO:0006139|GO:0060337|GO:0005737|GO:0005783|GO:0005792|GO:0005739|GO:0005634	NP_058132	2',5'-oligoadenylate synthetase 1, 40/46kDa	2994.61	720.715	11.6254	9.40379
ASHG19A3A003019	2.07105	1.05036	2.07105	up	coding	NM_001159727	PLBD2	RefSeq_coding	2736	chr12	+	113796370	113827458		TCTTCAAGAGGTTCAACAGCGGCACCGGCATGGTGGTGGTGGCTGACAAGACCTCGGAGC	196463	Hs.115896	GO:0016787|GO:0016042|GO:0043202	NP_775813	Phospholipase B domain containing 2	111.041	59.9348	6.87321	5.82285
ASHG19A3A036245	2.25843	1.17532	2.25843	up	coding	NM_030769	NPL	RefSeq_coding	1552	chr1	+	182761393	182798588		ACAAACCAGATGTTGGAGGCTTTTGAACAAAAGGACTTCTCTTTAGCCCTGAACTATCAG	80896	Hs.496969	GO:0008747|GO:0016829|GO:0005975|GO:0005737	NP_110396	N-acetylneuraminate pyruvate lyase (dihydrodipicolinate synthase)	203.467	100.307	7.75414	6.57882
ASHG19A3A016259	2.29565	1.1989	2.29565	up	coding	NM_001135610	PRDM2	RefSeq_coding	2715	chr1	+	14026734	14151572		GCGAAACAGCGGCGGCGGCGGCGGCCCTCGGTGCTCTGAGGCGCTGGCGCGGCGGGCGCG	7799	Hs.371823	GO:0003677|GO:0018024|GO:0046872|GO:0008168|GO:0003700|GO:0030528|GO:0016740|GO:0008270|GO:0006355|GO:0006351|GO:0005794|GO:0005622|GO:0005634|GO:0005634	NP_056950	PR domain containing 2, with ZNF domain	262.001	127.94	8.119	6.9201
ASHG19A3A041938	2.47196	1.30566	2.47196	up	coding	NM_001002758	PRY2	RefSeq_coding	1238	chrY	-	24217902	24242154		AAGAGGAGCACACCACACCAGAAACAGACATCTTGCAGTGTTTCACTGTCTCAACCTTAT	442862	Hs.632847		NP_001002758	PTPN13-like, Y-linked 2	136.695	61.8967	7.17639	5.87073
ASHG19A3A049874	2.8371	1.50442	2.8371	up	coding	NM_001143945	GAS6	RefSeq_coding	2188	chr13	-	114523523	114539017		AAATGCTTCTCTTTGGGGTTGGGGTTTTAGTTTCAAATGCCCCCGGGGGGTTACTTTTTA	2621	Hs.646346	GO:0005509|GO:0048018|GO:0005102|GO:0007596|GO:0008283|GO:0044267|GO:0050900|GO:0017187|GO:0030168|GO:0002576|GO:0070374|GO:0048146|GO:0043687|GO:0006508|GO:0040008|GO:0007165|GO:0005796|GO:0005788|GO:0005576|GO:0005615|GO:0031093	NP_001137418	Growth arrest-specific 6	235.63	92.5354	7.9628	6.45838
ASHG19A3A024472	3.63967	1.86381	3.63967	up	coding	NM_004827	ABCG2	RefSeq_coding	4445	chr4	-	89011416	89080011		ATGAGCCTACAACTGGCTTAGACTCAAGCACAGCAAATGCTGTCCTTTTGCTCCTGAAAA	9429	Hs.480218	GO:0005524|GO:0016887|GO:0042626|GO:0015232|GO:0000166|GO:0005515|GO:0042803|GO:0005215|GO:0008559|GO:0006879|GO:0015886|GO:0042493|GO:0055085|GO:0006810|GO:0046415|GO:0016021|GO:0005886	NP_004818	ATP-binding cassette, sub-family G (WHITE), member 2	399.495	123.54	8.73473	6.87092
ASHG19A3A046935	4.11797	2.04193	4.11797	up	coding	NM_001136105	C11orf93	RefSeq_coding	1414	chr11	+	111169975	111179353		ATTTCCAATTTTCTGATGCTAAGCATTCATATGAAGTCCTCAGACCCGGTCACAGCGCCA	120376	Hs.31409		NP_001129577	Chromosome 11 open reading frame 93	345.505	94.0636	8.52342	6.48149
ASHG19A3A038431	2.22385	1.15306	2.22385	up	coding	NM_022160	DMRTA1	RefSeq_coding	2302	chr9	+	22446839	22452472		CATCCATTAATATACTTCAGTAAGTATGTGAGTGGATTATGAGGTCTTAAAATGCTGGGT	63951	Hs.371976	GO:0003677|GO:0046872|GO:0003700|GO:0030154|GO:0006355|GO:0007548|GO:0005634	NP_071443	DMRT-like family A1	614.784	312.226	9.35241	8.19935
ASHG19A3A052756	2.09432	1.06648	2.09432	up	coding	NM_001111	ADAR	RefSeq_coding	6640	chr1	-	154554535	154580682	NM_001025107,	GCCAGTCTCAGAAGAACTATGCTCCTCCTCTCAAGGTCCCCAGAAGCACAGCCAAAGACA	103	Hs.12341	GO:0003677|GO:0003726|GO:0003726|GO:0003726|GO:0003725|GO:0016787|GO:0046872|GO:0006382|GO:0016553|GO:0019221|GO:0031047|GO:0016556|GO:0006397|GO:0060337|GO:0005737|GO:0005622|GO:0005730|GO:0005654|GO:0005634|GO:0005634	NP_056656	Adenosine deaminase, RNA-specific	366.019	198.546	8.61282	7.54634
ASHG19A3A005693	2.41367	1.27123	2.41367	up	coding	NM_054033	FKBP1B	RefSeq_coding	1016	chr2	+	24272583	24286548		AGGTTTTGAAGAGGGTGCAGCCCAGCTGGGTCCTCTTTCTCCTCTCCCCATCTGCCCCCA	2281	Hs.709461	GO:0005528|GO:0016853|GO:0003755|GO:0005515|GO:0005102|GO:0005219|GO:0006458|GO:0042098|GO:0030073|GO:0006936|GO:0010459|GO:0032513|GO:0019227|GO:0018208|GO:0022417|GO:0042026|GO:0032234|GO:0010881|GO:0060314|GO:0060314|GO:0014808|GO:0009749|GO:0051775|GO:0006939|GO:0034704|GO:0005737|GO:0005829|GO:0033017	NP_473374	FK506 binding protein 1B, 12.6 kDa	6730.67	3115.04	12.7951	11.5239
ASHG19A3A018816	2.37864	1.25014	2.37864	up	coding	NM_175085	GART	RefSeq_coding	2207	chr21	-	34896315	34914464		ATGGAAAAAACTTCATGATAGCGTAAGTTTGGAAAGTTTAGCAAAATCACAGTGGTACTG	2618	Hs.473648	GO:0005524|GO:0016874|GO:0046872|GO:0008168|GO:0000166|GO:0004637|GO:0004641|GO:0004644|GO:0005515|GO:0016740|GO:0006189|GO:0009058|GO:0055086|GO:0048513|GO:0009113|GO:0006144|GO:0006164|GO:0009168|GO:0010035|GO:0010033|GO:0005737|GO:0005829	NP_780294	Phosphoribosylglycinamide formyltransferase, phosphoribosylglycinamide synthetase, phosphoribosylaminoimidazole synthetase	1463.82	695.482	10.6036	9.35342
ASHG19A3A035121	2.96538	1.56822	2.96538	up	coding	NM_001130929	PL-5283	RefSeq_coding	2515	chr7	+	135347220	135361159		GTGACAGATTAGGATTAAATTATGGTTTGACTTTTCCTAGCAGCGTGATCATGGGCAAGT	647087	Hs.200022		NP_001124401	PL-5283 protein	703.114	266.731	9.54605	7.97783
ASHG19A3A013428	2.04422	1.03155	2.04422	up	coding	NM_001034116	EIF2B4	RefSeq_coding	1763	chr2	-	27587220	27593324		ACGGCGGGCGGAGCCTAGGACTGAGGGCGATGGCTGCTGTGGCCGTGGCTGTTCGCGAGG	8890	Hs.169474	GO:0005085|GO:0005085|GO:0005515|GO:0003743|GO:0031369|GO:0044237|GO:0044267|GO:0051716|GO:0010467|GO:0042552|GO:0045947|GO:0032057|GO:0014003|GO:0001541|GO:0006417|GO:0009749|GO:0009408|GO:0009408|GO:0043434|GO:0006412|GO:0006413|GO:0005737|GO:0005829|GO:0005851	NP_751945	Eukaryotic translation initiation factor 2B, subunit 4 delta, 67kDa	234.716	128.375	7.95724	6.92569
ASHG19A3A023635	2.0957	1.06743	2.0957	up	coding	NM_002633	PGM1	RefSeq_coding	2487	chr1	+	64058946	64125914		TTCCAGAGCAGCGCCAACTACGCGGAGAACTTCATCCAGAGTATCATCTCCACCGTGGAG	5236	Hs.1869	GO:0016853|GO:0000287|GO:0004614|GO:0005975|GO:0006874|GO:0019388|GO:0019255|GO:0006006|GO:0006006|GO:0005978|GO:0005978|GO:0005980|GO:0005737|GO:0005829|GO:0005829	NP_002624	Phosphoglucomutase 1	118.189	63.0392	6.96653	5.8991
ASHG19A3A052963	2.07329	1.05192	2.07329	up	coding	NM_001018006	TPM1	RefSeq_coding	1797	chr15	+	63334837	63364111	NM_001018005,NM_001018004,NM_000366,	AAAGAAACTCAAGGGCACCGAAGATGAACTGGACAAATACTCTGAGGCTCTCAAAGATGC	7168	Hs.133892	GO:0003779|GO:0005200|GO:0008307|GO:0060048|GO:0006928|GO:0034614|GO:0007010|GO:0006936|GO:0030049|GO:0030049|GO:0030336|GO:0032781|GO:0045785|GO:0003065|GO:0051496|GO:0008016|GO:0006937|GO:0031529|GO:0045214|GO:0055010|GO:0042060|GO:0015629|GO:0032059|GO:0005737|GO:0005856|GO:0005829|GO:0005862|GO:0032587|GO:0030017|GO:0001725	NP_001018020	Tropomyosin 1 (alpha)	986.636	538.331	10.0305	8.97853
ASHG19A3A005561	2.54727	1.34895	2.54727	up	coding	NM_032952	MLXIPL	RefSeq_coding	3231	chr7	-	73007523	73038870		ACTCAGTGCCCAGCCCAGCCTCAAGGAGCGTGCGGGCTTGCAGGAGGAGGCCCAGCAGCT	51085	Hs.647055	GO:0003677|GO:0003677|GO:0035538|GO:0046982|GO:0042803|GO:0003700|GO:0016563|GO:0008134|GO:0016564|GO:0009653|GO:0006112|GO:0042593|GO:0010255|GO:0007243|GO:0071157|GO:0090324|GO:0033137|GO:0000122|GO:0045892|GO:0008284|GO:0031325|GO:0045723|GO:0010552|GO:0045821|GO:0046889|GO:0045893|GO:0042304|GO:0006355|GO:0006351|GO:0070328|GO:0005737|GO:0005829|GO:0005654|GO:0005634|GO:0005634|GO:0005667	NP_116572	MLX interacting protein-like	155.136	68.1792	7.3617	6.01275
ASHG19A3A029904	3.29049	1.7183	3.29049	up	coding	NM_018561	USP49	RefSeq_coding	3194	chr6	-	41765383	41863099		TTGTCCCTTTGAATCAAACAGAGTGCTTGCTCACTGAGATGCTGGCCAAATTCACAGAGA	25862	Hs.665742	GO:0008234|GO:0046872|GO:0008233|GO:0004221|GO:0008270|GO:0006511	NP_061031	Ubiquitin specific peptidase 49	218.924	74.5227	7.85937	6.14107
ASHG19A3A054945	2.74604	1.45735	2.74604	up	coding	NM_006086	TUBB3	RefSeq_coding	1736	chr16	+	89989744	90002505		GCCTGACGTTTTACGGTTTTGTTTTTTACTGGTTTGTGTTTATATTTTCGGGGATACTTA	10381	Hs.511743	GO:0005525|GO:0003924|GO:0000166|GO:0042277|GO:0005198|GO:0051084|GO:0007411|GO:0044267|GO:0007018|GO:0007067|GO:0030182|GO:0006457|GO:0051258|GO:0030424|GO:0005737|GO:0005622|GO:0005874	NP_006077	Tubulin, beta 3	53662.7	20946.1	15.7289	14.2716
ASHG19A3A003823	2.16984	1.11759	2.16984	up	coding	NM_001178064	NELF	RefSeq_coding	3562	chr9	-	140342024	140353786		GGCAGCCGGAGGGTGAAGGCCCAGAGCAGTGACCTGCAGAGCTCCCACTGCACGCTGGAC	26012	Hs.455336	GO:0005634|GO:0005886	NP_056352	Nasal embryonic LHRH factor	121.616	62.6981	7.00878	5.8912
ASHG19A3A023418	2.31813	1.21296	2.31813	up	coding	NM_007287	MME	RefSeq_coding	5619	chr3	+	154797704	154901518		TGCGCTCATTGGTCGGGATGTGTCGGCTCAGCAGCCTCCAACTTCTCCCGAATCCCACTG	4311	Hs.307734	GO:0046872|GO:0004222|GO:0008237|GO:0008233|GO:0042277|GO:0005515|GO:0008270|GO:0007267|GO:0006518|GO:0006508|GO:0005887|GO:0005624|GO:0005886	NP_009220	Membrane metallo-endopeptidase	307.813	149.651	8.35736	7.1444
ASHG19A3A003978	2.5209	1.33394	2.5209	up	coding	NM_002038	IFI6	RefSeq_coding	836	chr1	-	27992571	27998724		TGCTCTTCACTTGCAGTGGGGTGGAGGCAGGTAAGAAAAAGTGCTCGGAGAGCTCGGACA	2537	Hs.523847	GO:0005515|GO:0006916|GO:0019221|GO:0006955|GO:0043154|GO:0051902|GO:0001836|GO:0060337|GO:0016021|GO:0016020|GO:0005739	NP_075011	Interferon, alpha-inducible protein 6	145.352	64.4786	7.26622	5.93229
ASHG19A3A054333	2.19141	1.13186	2.19141	up	coding	NM_001160364	TMC7	RefSeq_coding	4524	chr16	+	18995608	19075260		ACAGTTAGACCAACTTGAAACCGAATTCTGCCTTGTCTGTTTATTGCTGTGGGACCTTTG	79905	Hs.187377	GO:0016021|GO:0016020	NP_079123	Transmembrane channel-like 7	163.787	83.6109	7.43811	6.30625
ASHG19A3A024847	2.5093	1.32729	2.5093	up	coding	NM_007034	DNAJB4	RefSeq_coding	2250	chr1	+	78470635	78482993		CCAAAATTACTTTTCCAAGAGAAGGAGATGAAACACCAAATAGTATTCCAGCAGACATTG	11080	Hs.13852	GO:0031072|GO:0051082|GO:0006457|GO:0009408|GO:0006986|GO:0005737|GO:0005886	NP_008965	DnaJ (Hsp40) homolog, subfamily B, member 4	428.795	193.686	8.84131	7.51403
ASHG19A3A008136	3.09875	1.63169	3.09875	up	coding	NM_033389	SSH2	RefSeq_coding	9166	chr17	-	27952964	28257018		AAAGAAAGACGAACGGTAACCAAGCCCAACCCAAGCTTCATGAGACAACTGGAAGAGTAT	85464	Hs.654754	GO:0003779|GO:0016787|GO:0004721|GO:0004725|GO:0008138|GO:0030036|GO:0006470|GO:0008064|GO:0050770|GO:0010591|GO:0005737|GO:0005856	NP_203747	Slingshot homolog 2 (Drosophila)	163.336	59.1456	7.43402	5.80234
ASHG19A3A003433	2.93895	1.5553	2.93895	up	coding	NM_001167917	VEPH1	RefSeq_coding	992	chr3	-	157177409	157213295		GTTATAGTAAAGAGCATACTCCAAGTTTGAAGAACTGCATTTCCGTGCTTCTGGTCACCT	79674	Hs.658046	GO:0005886	NP_078897	Ventricular zone expressed PH domain homolog 1 (zebrafish)	611.862	234.963	9.34609	7.79078
ASHG19A3A032521	2.05815	1.04134	2.05815	up	coding	NM_001002926	TWISTNB	RefSeq_coding	3892	chr7	-	19735084	19748660		TCGTTTAGACTCAGATGCTGCTGGAGTATTCTGCATTCGGGGAAAACTAAATATCACAAG	221830	Hs.353035	GO:0003899|GO:0015630|GO:0005730|GO:0005634	NP_001002926	TWIST neighbor	1987.14	1093.15	11.0503	10.0089
ASHG19A3A005182	2.16264	1.1128	2.16264	up	coding	NM_020954	RNF213	RefSeq_coding	5330	chr17	+	78234666	78295260		TGTTCCAAAGCCTCCTGGACCGTCCAAGAAAGCaaaaagaagaaaaggaagaagaaaaag	57674	Hs.195642	GO:0046872|GO:0017111|GO:0000166|GO:0008270	NP_066005	Ring finger protein 213	175.867	90.9686	7.5444	6.43161
ASHG19A3A002686	2.80982	1.49048	2.80982	up	coding	NM_001144767	UGT2B10	RefSeq_coding	2504	chr4	-	69870294	69886113		CGTTTTTGCAGATGCTTATTTACCCTGTGGAAGACCCACTACCTTATCTGAGACAATGGG	7365	Hs.201634	GO:0015020|GO:0006629|GO:0008152|GO:0005783|GO:0005789|GO:0016021|GO:0016020|GO:0005792	NP_001138239	UDP glucuronosyltransferase 2 family, polypeptide B10	265.916	105.613	8.14062	6.65013
ASHG19A3A020062	2.04862	1.03465	2.04862	up	coding	NM_017414	USP18	RefSeq_coding	2037	chr22	+	18632757	18660160		TACATCCGGAATGCTGTGGATGGAAAATGGTTCTGCTTCAATGACTCCAATATTTGCTTG	11274	Hs.38260	GO:0008234|GO:0008233|GO:0004221|GO:0004843|GO:0019221|GO:0060338|GO:0060337|GO:0006511|GO:0005829|GO:0005634	NP_059110	Ubiquitin specific peptidase 18	776.004	430.384	9.69142	8.65677
ASHG19A3A047020	2.16201	1.11237	2.16201	up	coding	NM_006760	UPK2	RefSeq_coding	947	chr11	+	118827007	118829268		AACAATTCCCCCATCCTTCAGTGAACTAAGTCCCTATAATAAAGGCTGAGGCTGCATCTG	7379	Hs.379613	GO:0016044|GO:0030855|GO:0007275|GO:0016324|GO:0030176|GO:0005887|GO:0005886	NP_006751	Uroplakin 2	20135.2	10319.3	14.3744	13.262
ASHG19A3A005803	3.17538	1.66693	3.17538	up	coding	NM_133342	RAD17	RefSeq_coding	2972	chr5	+	68665638	68710626	NM_133338,	TAAAAGGGGATGCAGCTCCGGGAAACAAGTGAATTCATGGTATTTTACTTTTTTGGGAAA	5884	Hs.16184	GO:0005524|GO:0017111|GO:0000166|GO:0005515|GO:0000077|GO:0006281|GO:0006260|GO:0000076|GO:0007049|GO:0000075|GO:0007093|GO:0008156|GO:0042325|GO:0006974|GO:0000781|GO:0005730|GO:0005654|GO:0005634	NP_579922	RAD17 homolog (S. pombe)	209.571	74.0182	7.79696	6.13003
ASHG19A3A012281	2.65901	1.41089	2.65901	up	coding	NM_004343	CALR	RefSeq_coding	1929	chr19	+	13049413	13055304		TCATGTCATCTTCAACTACAAGGGCAAGAACGTGCTGATCAACAAGGACATCCGTTGCAA	811	Hs.515162	GO:0003677|GO:0050681|GO:0005509|GO:0005509|GO:0030246|GO:0051087|GO:0001849|GO:0042562|GO:0005178|GO:0005506|GO:0003729|GO:0042277|GO:0005515|GO:0044183|GO:0005529|GO:0016564|GO:0031625|GO:0051082|GO:0008270|GO:0055007|GO:0007050|GO:0006874|GO:0044267|GO:0071285|GO:0071310|GO:0090398|GO:0030866|GO:0042921|GO:0045665|GO:0048387|GO:0033144|GO:0000122|GO:0017148|GO:0017148|GO:0002502|GO:0045740|GO:…	NP_004334	Calreticulin	130.397	55.1301	7.11005	5.69916
ASHG19A3A044234	5.55074	2.47268	5.55074	up	coding	NM_001146157	FAM25A	RefSeq_coding	362	chr10	+	88780045	88784486	NM_001137548,ENST00000399377,	TCATGCCGTGGAAGAAGTGGTGAAGGAGGTGGTGGGACACGCCAAGGAGACTGGAGAGAA	643161	Hs.729945		NP_001139629	Family with sequence similarity 25, member A	270.5	54.9544	8.16598	5.6933
ASHG19A3A033277	2.27623	1.18665	2.27623	up	coding	NM_003378	VGF	RefSeq_coding	2586	chr7	-	100805790	100808852		CTCTGTTGTAAATACCCCTCACGGAGGAAATAGTTTTGCTAAGAAATAAAAGTGACTATT	7425	Hs.587325	GO:0008083|GO:0003674|GO:0005184|GO:0006091|GO:0042593|GO:0030073|GO:0001541|GO:0043084|GO:0048168|GO:0051591|GO:0009409|GO:0002021|GO:0032868|GO:0019953|GO:0031410|GO:0005576|GO:0005615|GO:0043005|GO:0043025|GO:0030667|GO:0030133	NP_003369	VGF nerve growth factor inducible	38012.2	18114.5	15.2669	14.0803
ASHG19A3A005126	2.86947	1.52078	2.86947	up	coding	NM_020129	LGALS14	RefSeq_coding	794	chr19	+	40194945	40200087		GGAGAGAACAATGTCATCACTACCCGTACCATACACACTGCCTGTTTCCTTGCCTGTTGG	56891	Hs.24236	GO:0005529|GO:0005634	NP_982297	Lectin, galactoside-binding, soluble, 14	259.72	100.601	8.10418	6.5834
ASHG19A3A040305	9.17397	3.19755	9.17397	up	coding	NM_001017978	CXorf61	RefSeq_coding	548	chrX	-	115592851	115594137		ACATACTCTACTTAGCAAGGGTTTCAGAGGTGCATCACCTCACCGGAAATCCACCTAAAA	203413	Hs.97892	GO:0016021|GO:0005886	NP_001017978	Chromosome X open reading frame 61	12417.7	1509.59	13.6713	10.4737
ASHG19A3A045299	2.93597	1.55384	2.93597	up	coding	NM_199352	SLC22A25	RefSeq_coding	1644	chr11	-	62931295	62997124		AAGTACCATCCCTTTTTGGGGCCTTACTTTGCACCTCCAGCATCTGGGAAACAATGTTTT	387601	Hs.332119	GO:0055085|GO:0016021|GO:0016020	NP_955384	Solute carrier family 22, member 25	331.611	126.977	8.46354	6.9097
ASHG19A3A054152	2.48719	1.31452	2.48719	up	coding	NM_003294	TPSAB1	RefSeq_coding	1194	chr16	+	1290677	1292554	NM_024164,	TAGCTGGTGGTGGGCGCTAATCCTCCTGAGTGCTGGACCTCATTAAAGTGCATGGAAATC	7177	Hs.405479	GO:0008233|GO:0005515|GO:0004252|GO:0008236|GO:0006952|GO:0006508|GO:0031012|GO:0005576|GO:0005615	NP_003285	Tryptase alpha/beta 1	242.425	108.473	8.00338	6.68887
ASHG19A3A043143	3.22328	1.68853	3.22328	up	coding	NM_001034954	SORBS1	RefSeq_coding	7226	chr10	-	97071530	97200937		GAGCTCTGATAGTGTCATCTCCCAGCTTAGTGATGCCTTTAGCAGCCAGAGCAAGAGGCA	10580	Hs.38621	GO:0005070|GO:0005070|GO:0003779|GO:0008092|GO:0005158|GO:0005515|GO:0019901|GO:0007160|GO:0032869|GO:0048041|GO:0015758|GO:0008286|GO:0006936|GO:0090004|GO:0046326|GO:0045725|GO:0046889|GO:0043149|GO:0006810|GO:0030054|GO:0005913|GO:0005924|GO:0005813|GO:0005737|GO:0005856|GO:0005829|GO:0005829|GO:0005925|GO:0005899|GO:0045121|GO:0005730|GO:0005634|GO:0005886|GO:0001725|GO:0005915	NP_079267	Sorbin and SH3 domain containing 1	208.542	72.593	7.78935	6.10082
ASHG19A3A011731	2.42153	1.27592	2.42153	up	coding	NM_001012964	KLK6	RefSeq_coding	1527	chr19	-	51461887	51472047	NM_001012965,	AGTGTCTTCTCTCCTCACGGCTCCCCGCATTTCTAACTCTTTCTGCCTCCTCGTCTCAAA	5653	Hs.79361	GO:0008233|GO:0005515|GO:0004252|GO:0004252|GO:0042982|GO:0007417|GO:0030574|GO:0042445|GO:0042552|GO:0045745|GO:0016540|GO:0006508|GO:0045595|GO:0009611|GO:0042246|GO:0005737|GO:0005783|GO:0005576|GO:0005792|GO:0005739|GO:0005730|GO:0005634	NP_002765	Kallikrein-related peptidase 6	1450.4	678.921	10.5898	9.31387
ASHG19A3A022637	2.13256	1.09259	2.13256	up	coding	NM_002070	GNAI2	RefSeq_coding	2200	chr3	+	50273646	50296786		ACAAGAACCTGCGGGAGGACGGAGAGAAGGCGGCGCGGGAGGTGAAGTTGCTGCTGTTGG	2771	Hs.77269	GO:0031683|GO:0001664|GO:0005525|GO:0003924|GO:0003924|GO:0019001|GO:0000166|GO:0005515|GO:0004871|GO:0007186|GO:0006184|GO:0006184|GO:0000186|GO:0001973|GO:0007596|GO:0007214|GO:0007193|GO:0007243|GO:0007213|GO:0007194|GO:0051927|GO:0050805|GO:0030168|GO:0008284|GO:0007584|GO:0007165|GO:0007268|GO:0005813|GO:0005737|GO:0005829|GO:0031234|GO:0005834|GO:0005624|GO:0045121|GO:0030496|GO:0005634|GO:…	NP_002061	Guanine nucleotide binding protein (G protein), alpha inhibiting activity polypeptide 2	191.237	99.5582	7.66114	6.56855
ASHG19A3A054625	5.01502	2.32626	5.01502	up	coding	NM_005947	MT1B	RefSeq_coding	403	chr16	+	56685810	56687115		ATCTTGCCTAGGAACTCCAGGCTTGTCTTGGCTCCAAATGGATCCCAACTGCTCCTGCAC	4490	Hs.656629	GO:0046870|GO:0005507|GO:0046872|GO:0008270|GO:0008150|GO:0005737	NP_005938	Metallothionein 1B	357.025	80.108	8.57167	6.24542
ASHG19A3A021119	2.79513	1.48291	2.79513	up	coding	NM_001143833	IQCF6	RefSeq_coding	447	chr3	-	51812577	51813009		GCGCTGACAGAGCCAAGGAGGCTGGATCTCTCTTCCAATAAAGACCCTTACTGACCATAC	440956	Hs.444316		NP_001137305	IQ motif containing F6	207.622	83.227	7.78343	6.30051
ASHG19A3A032306	2.11056	1.07763	2.11056	up	coding	NM_018116	MSTO1	RefSeq_coding	2446	chr1	+	155580006	155584757	NR_024117,ENST00000452804,	ACACACAAAGAGGAACTCTATCCCAAGAACCCTTATCTCCAAGACTTTCTGAGTGCAGAG	55154	Hs.656547	GO:0003674|GO:0048311|GO:0007005|GO:0051258|GO:0005737|GO:0016020|GO:0005741|GO:0005739|GO:0043234	NP_060586	Misato homolog 1 (Drosophila)	248.712	132.226	8.04305	6.96542
ASHG19A3A030256	2.16257	1.11274	2.16257	up	coding	NM_001102663	NBPF16	RefSeq_coding	3837	chr1	+	148577356	148596267	uc001erc.3,NM_183372,NM_173638,NM_017940,NM_017940,NM_017940,NM_001170755,NM_001101663,NM_001039703,NM_001039703,NM_001037675,AX747492,AX747492,AX747492,	GAAACAGCAGTTCAGAAACCTCAAAGAGAAATGTTTTCTAACTCAACTGGCCGGCTTCCT	55672	Hs.523572	GO:0005737	NP_060410	Neuroblastoma breakpoint family, member 1	172.468	89.0968	7.51382	6.40107
ASHG19A3A035918	2.12042	1.08435	2.12042	up	coding	NM_001099670	C8orf59	RefSeq_coding	1050	chr8	-	86126287	86132643		TGTAGTAAGGCTACATTGAAGGAAGATATAAATTTCAGTCAAGACTACGACTGAGCAAAG	401466	Hs.443072		NP_001093143	Chromosome 8 open reading frame 59	3696.72	1964.53	11.9324	10.8481
ASHG19A3A002442	2.02646	1.01896	2.02646	up	coding	NM_001136538	ACAD10	RefSeq_coding	4124	chr12	+	112123856	112194910		CCTTACCCTCCCAAAGTGGTGAGATTACAGGTTAATGACCCAGAGACTGCAGTAAAGGAA	80724	Hs.331141	GO:0003995|GO:0050660|GO:0016787|GO:0055114	NP_079523	Acyl-CoA dehydrogenase family, member 10	272.938	151.297	8.17831	7.15935
ASHG19A3A003841	2.33225	1.22172	2.33225	up	coding	NM_001178110	ZNF185	RefSeq_coding	4167	chrX	+	152082985	152142024	NM_001178113,	TCTGGCAAGATCCACTCCTGGCTCAAACAGGTCTTCCCCAGGCAACAAAGACAAGGAGGC	7739	Hs.16622	GO:0046872|GO:0008270|GO:0030054|GO:0005737|GO:0005856|GO:0005925	NP_009081	Zinc finger protein 185 (LIM domain)	197.618	94.4238	7.7098	6.48808
ASHG19A3A036891	4.03041	2.01093	4.03041	up	coding	NM_032899	FAM83A	RefSeq_coding	2946	chr8	+	124194751	124221205		TAGGTCCTGAGGGCACAGCCTAGCTGAGTGCAAAGAAATATAGGATGCTTAGAAAGCATA	84985	Hs.379821		NP_996889	Family with sequence similarity 83, member A	241.96	67.1874	8.00098	5.99005
ASHG19A3A005021	2.10717	1.07531	2.10717	up	coding	NM_018299	UBE2W	RefSeq_coding	4024	chr8	-	74702841	74791110		TGGTTCCATCATGGCGTCAATGCAGAAACGACTACAGAAAGAACTGTTGGCTTTGCAAAA	55284	Hs.728774	GO:0005524|GO:0016881|GO:0016874|GO:0000166|GO:0005515|GO:0004842|GO:0043687|GO:0070979|GO:0006513	NP_060769	Ubiquitin-conjugating enzyme E2W (putative)	157.523	83.6897	7.38328	6.30797
ASHG19A3A008202	3.65269	1.86896	3.65269	up	coding	NM_002985	CCL5	RefSeq_coding	1237	chr17	-	34198497	34207377		CAGGAGCTTACTGGCAAACATGAAAAATCGGCTTACCATTAAAGTTCTCAATGCAACCAT	6352	Hs.514821	GO:0031726|GO:0031726|GO:0031729|GO:0031730|GO:0042056|GO:0008009|GO:0008009|GO:0046817|GO:0042379|GO:0042803|GO:0043621|GO:0030298|GO:0031584|GO:0007568|GO:0007267|GO:0043623|GO:0070098|GO:0006935|GO:0002407|GO:0048245|GO:0006955|GO:0007159|GO:0048247|GO:0048246|GO:0070233|GO:0070100|GO:0045071|GO:0042119|GO:0050918|GO:0046427|GO:0070234|GO:0010820|GO:0042102|GO:0010535|GO:0045785|GO:0033634|GO:…	NP_002976	Chemokine (C-C motif) ligand 5	1739.17	541.86	10.8559	8.98698
ASHG19A3A005656	2.63889	1.39993	2.63889	up	coding	NM_033645	FBXW11	RefSeq_coding	4473	chr5	-	171288555	171433877		TTGAGGACAAGACCATCGAGCTCATGATAAGTAATGGAACATCATCTGTGATCGTCTCCA	23291	Hs.484138	GO:0005515|GO:0016566|GO:0016563|GO:0004842|GO:0004842|GO:0031146|GO:0016055|GO:0007049|GO:0042347|GO:0032582|GO:0042753|GO:0043193|GO:0045862|GO:0043161|GO:0006470|GO:0031648|GO:0000209|GO:0016567|GO:0016567|GO:0048511|GO:0019005|GO:0005737|GO:0005829|GO:0005634|GO:0000151	NP_387449	F-box and WD repeat domain containing 11	713.537	304.759	9.56499	8.16506
ASHG19A3A001413	4.10857	2.03864	4.10857	up	coding	NM_001750	CAST	RefSeq_coding	4629	chr5	+	95997940	96110383	NM_001042445,NM_001042443,NM_001042442,	TGAGAAGAAGTCACAGTCAACCAAGCTGTCTGTGGTTCATGAGAAAAAATCCCAAGAAGG						2296.54	636.015	11.2549	9.21624
ASHG19A3A046790	2.05677	1.04038	2.05677	up	coding	NM_173039	AQP11	RefSeq_coding	1561	chr11	+	77300679	77320691		TGTGTTTTGATGAAGCATTCCCTCAGTTTTTTATAGTATACTGGCTGGCTCCTTCTTTAG	282679	Hs.503345	GO:0003674|GO:0005215|GO:0048388|GO:0015793|GO:0006811|GO:0001822|GO:0051260|GO:0015840|GO:0006833|GO:0009986|GO:0005737|GO:0005829|GO:0030425|GO:0005783|GO:0016021|GO:0005886	NP_766627	Aquaporin 11	1641.47	901.119	10.7681	9.72772
ASHG19A3A026663	2.48988	1.31608	2.48988	up	coding	NM_181435	C1QTNF3	RefSeq_coding	3789	chr5	-	34017963	34043317		ACTGTGGATAATAACACTTCTACAGACCTAAAATCCCTGAGACCAGATGAGCTACCGCAC	114899	Hs.171929	GO:0005576	NP_852100	C1q and tumor necrosis factor related protein 3	200.527	90.0757	7.73211	6.41603
ASHG19A3A013386	2.41552	1.27234	2.41552	up	coding	NM_022552	DNMT3A	RefSeq_coding	4314	chr2	-	25455845	25564774		GACGCGGCGCCGCGGCACCAGGGCGCGCAGCCGGGCCGGCCCGACCCCACCGGCCATACG	1788	Hs.515840	GO:0003886|GO:0003677|GO:0003682|GO:0046872|GO:0008168|GO:0005515|GO:0016740|GO:0008270|GO:0090116|GO:0006306|GO:0043045|GO:0043046|GO:0016568|GO:0006346|GO:0000122|GO:0006349|GO:0007283|GO:0000775|GO:0005737|GO:0000791|GO:0005720|GO:0016363|GO:0005634	NP_783329	DNA (cytosine-5-)-methyltransferase 3 alpha	132.968	61.6865	7.1366	5.86426
ASHG19A3A052278	2.93863	1.55514	2.93863	up	coding	NM_017851	PARP16	RefSeq_coding	2551	chr15	-	65550437	65579018		ATGCATTTCATGGTAGCCGCCTAGAAAACTTCCATTCCATTATCCACAATGGCCTGCACT	54956	Hs.30634	GO:0003950|GO:0016757|GO:0016021|GO:0016020	NP_060321	Poly (ADP-ribose) polymerase family, member 16	1321.49	511.683	10.4551	8.9
ASHG19A3A046657	2.67763	1.42096	2.67763	up	coding	NM_198517	TBC1D10C	RefSeq_coding	1766	chr11	+	67171411	67177559		CAGTGGATGGAGACCATTGGCAGGGACCTGCACCGTCAATTCCCTCTGCACGAGATGTTT	374403	Hs.534648	GO:0005096|GO:0005097|GO:0032313|GO:0005622	NP_940919	TBC1 domain family, member 10C	330.275	139.119	8.45755	7.0366
ASHG19A3A030381	2.3067	1.20583	2.3067	up	coding	NM_015076	CDK19	RefSeq_coding	6139	chr6	-	110931180	111136412		TCCTTTCTCACAGTGACAGGAAGGTATGGCTGCTGTTTGATTATGCAGAGCATGACTTGT	23097	Hs.726041	GO:0005524|GO:0004693|GO:0000166|GO:0005515|GO:0016740|GO:0006468	NP_055891	Cyclin-dependent kinase 19	169.582	82.2631	7.49037	6.28454
ASHG19A3A031986	3.41196	1.7706	3.41196	up	coding	NM_001010919	FAM26F	RefSeq_coding	1109	chr6	+	116782555	116784933		AGATACGGTGATTCCTGTTCTTGGCTTTGTAGATTCATCTGGTATAAACAGCACTCCTGA	441168	Hs.381220	GO:0016021|GO:0016020	NP_001010919	Family with sequence similarity 26, member F	3319.53	1087.17	11.7713	10.0007
ASHG19A3A018520	4.371	2.12796	4.371	up	coding	NM_177980	CDH26	RefSeq_coding	3193	chr20	+	58533470	58588167		TATCCAATGATGAAGGCCACCAAACACTGGTCATGTATAATGCGGAGAGCAAAGGCACTT	60437	Hs.729046	GO:0005509|GO:0007155|GO:0007156|GO:0016021|GO:0005886	NP_817089	Cadherin 26	2148.04	559.99	11.1596	9.03163
ASHG19A3A034936	2.25661	1.17416	2.25661	up	coding	NM_015641	TES	RefSeq_coding	2766	chr7	+	115850580	115898835		AGGAGGAGGAGGGGACCCATAGGACGCGTTAACATGGACCTGGAAAACAAAGTGAAGAAG	26136	Hs.592286	GO:0046872|GO:0008270|GO:0030054|GO:0005737|GO:0005925|GO:0005730|GO:0005634|GO:0005886	NP_690042	Testis derived transcript (3 LIM domains)	201.457	99.3576	7.73924	6.56509
ASHG19A3A052532	2.61227	1.3853	2.61227	up	coding	NM_016321	RHCG	RefSeq_coding	1952	chr15	-	90014637	90039799		TCTCTGTGTTGTGTGCGTGGCAGCCTCCAGGAATAAACATTCTTGTTGTCCTTTGTAAAA	51458	Hs.459284	GO:0051739|GO:0008519|GO:0008519|GO:0008519|GO:0030506|GO:0015837|GO:0072488|GO:0072488|GO:0072488|GO:0015696|GO:0015696|GO:0006873|GO:0030855|GO:0042592|GO:0006885|GO:0070634|GO:0055085|GO:0016324|GO:0016323|GO:0031410|GO:0005887|GO:0005886|GO:0005886	NP_057405	Rh family, C glycoprotein	592.281	255.762	9.30263	7.91733
ASHG19A3A033430	2.52564	1.33665	2.52564	up	coding	NM_003391	WNT2	RefSeq_coding	2907	chr7	-	116916687	116963343		GTCGGGAATCTGCCTTTGTTTATGCCATCTCCTCAGCTGGAGTTGTATTTGCCATCACCA	7472	Hs.567356	GO:0005125|GO:0005109|GO:0005110|GO:0004871|GO:0016055|GO:0007223|GO:0055009|GO:0060070|GO:0060317|GO:0007267|GO:0071300|GO:0071560|GO:0009950|GO:0061072|GO:0060716|GO:0002088|GO:0030324|GO:0060492|GO:0061180|GO:0007275|GO:0010553|GO:0030182|GO:0090263|GO:0060045|GO:0008284|GO:0001938|GO:0060501|GO:0048146|GO:0002053|GO:0051091|GO:0045944|GO:0005737|GO:0031012|GO:0005576|GO:0005615|GO:0005886|GO:…	NP_003382	Wingless-type MMTV integration site family member 2	320.581	143.194	8.41288	7.07623
ASHG19A3A045750	2.15232	1.10589	2.15232	up	coding	NM_005797	MPZL2	RefSeq_coding	2871	chr11	-	118124132	118135251		GGGGTAATATGGGCCTGTTGTTTAGTGTCTCCTTCCTAAAGAGCACTTTTGTATTGTAAT	10205	Hs.116651	GO:0009653|GO:0007155|GO:0007156|GO:0005856|GO:0016021|GO:0016020	NP_658911	Myelin protein zero-like 2	18865.6	9793.43	14.2865	13.1806
ASHG19A3A027687	2.19314	1.133	2.19314	up	coding	NM_033644	FBXW11	RefSeq_coding	4536	chr5	-	171288555	171433877		ACTTCAGTTATGGAAGATCAAAATGAAGATGAGTCCCCAAAGAAAAATACTCTTTGGCAG	23291	Hs.484138	GO:0005515|GO:0016566|GO:0016563|GO:0004842|GO:0004842|GO:0031146|GO:0016055|GO:0007049|GO:0042347|GO:0032582|GO:0042753|GO:0043193|GO:0045862|GO:0043161|GO:0006470|GO:0031648|GO:0000209|GO:0016567|GO:0016567|GO:0048511|GO:0019005|GO:0005737|GO:0005829|GO:0005634|GO:0000151	NP_387449	F-box and WD repeat domain containing 11	744.786	384.744	9.63203	8.49903
ASHG19A3A049064	4.40362	2.13869	4.40362	up	coding	NM_016817	OAS2	RefSeq_coding	3539	chr12	+	113416273	113449527		GGTCTAGGTGCTTTAACCTCACATACCCTCACTTAAACTTTTATCACTGTTGCATATACC	4939	Hs.414332	GO:0005524|GO:0003723|GO:0000166|GO:0016779|GO:0016740|GO:0019221|GO:0006955|GO:0060333|GO:0006139|GO:0060337|GO:0005783|GO:0016020|GO:0005792|GO:0005739|GO:0005634	NP_058197	2'-5'-oligoadenylate synthetase 2, 69/71kDa	691.889	176.912	9.52168	7.38299
CUST_79_PI426249100	2.58132	1.36811	2.58132	up	coding	NM_019102_Exon2-	NM_019102	HOX cluster	709	chr7	-	27180995	27181704	NM_019102,	CGTGGAAGTGTTCCTGTCTCAATAGCTCCAAGCTGTTAAAGATATTTTTATTCAAACTAC						226.979	97.7264	7.90829	6.54018
ASHG19A3A034175	2.06114	1.04344	2.06114	up	coding	NM_004528	MGST3	RefSeq_coding	688	chr1	+	165600449	165624853		CAGTGGACCCAAATGCTGCCATTAAAGAATTATAGGGGTTTAAAAACTCTCATTCATTTT	4259	Hs.191734	GO:0004364|GO:0004601|GO:0016740|GO:0006629|GO:0007165|GO:0006805|GO:0005783|GO:0005789|GO:0016021|GO:0016020|GO:0005624|GO:0005792	NP_004519	Microsomal glutathione S-transferase 3	33227.1	17375.1	15.0624	14.019
ASHG19A3A053525	2.25019	1.17005	2.25019	up	coding	NM_001878	CRABP2	RefSeq_coding	969	chr1	-	156669409	156675375		TTCTCTGGCAACTGGAAAATCATCCGATCGGAAAACTTCGAGGAATTGCTCAAAGTGCTG	1382	Hs.405662	GO:0008289|GO:0016918|GO:0001972|GO:0005501|GO:0019841|GO:0005215|GO:0035115|GO:0008544|GO:0006355|GO:0042573|GO:0007165|GO:0005737|GO:0005730|GO:0005634	NP_001869	Cellular retinoic acid binding protein 2	7273.16	3583.47	12.9012	11.7311
ASHG19A3A018518	2.20132	1.13837	2.20132	up	coding	NM_022106	C20orf177	RefSeq_coding	3825	chr20	+	58515555	58522559		CCCCAGCTGTCATCATCTTCCAGCAGATTGAGCAAGAATATTTTGAGCACTACAGGAAAG	63939	Hs.54973		NP_071389	Chromosome 20 open reading frame 177	1680.29	861.838	10.7997	9.66129
ASHG19A3A001553	3.528	1.81885	3.528	up	coding	NM_001079804	GAA	RefSeq_coding	3517	chr17	+	78075354	78093678		GCGGCCAGGGCGCGCGTGCGCGGAGGCCTGTAGGAGCTGTCCAGGCCATCTCCAACCATG	2548	Hs.1437	GO:0004558|GO:0030246|GO:0004553|GO:0032450|GO:0005975|GO:0060048|GO:0002086|GO:0006006|GO:0005980|GO:0003007|GO:0007626|GO:0007040|GO:0000023|GO:0046716|GO:0007517|GO:0050885|GO:0050884|GO:0002026|GO:0005985|GO:0009888|GO:0043587|GO:0043181|GO:0055010|GO:0005765|GO:0005764|GO:0016020	NP_001073272	Glucosidase, alpha; acid	177.356	56.6063	7.55725	5.7384
ASHG19A3A025132	2.19226	1.13242	2.19226	up	coding	NM_207578	PRKACB	RefSeq_coding	1863	chr1	+	84543744	84670977		CCTTTACTCATCTAAAGTAGAAGTCATGAAAGTGGAATTTTTGCCATTAAAAGGCTCTGT	5567	Hs.487325	GO:0005524|GO:0004691|GO:0004691|GO:0016301|GO:0000287|GO:0000166|GO:0004674|GO:0004674|GO:0016740|GO:0007188|GO:0007202|GO:0034199|GO:0007596|GO:0005975|GO:0071377|GO:0006112|GO:0006094|GO:0006006|GO:0007243|GO:0006629|GO:0048011|GO:0016310|GO:0006468|GO:0050796|GO:0007165|GO:0007268|GO:0055085|GO:0019433|GO:0006833|GO:0005952|GO:0005737|GO:0005829|GO:0005829|GO:0005654|GO:0005634	NP_997461	Protein kinase, cAMP-dependent, catalytic, beta	313.235	160.843	8.38091	7.24849
ASHG19A3A033567	5.23842	2.38913	5.23842	up	coding	NM_001105543	PLXNA4	RefSeq_coding	3408	chr7	-	132068246	132261323		GCCAATCTTGTAACTGATTCTTGTGTGATAACATTCAGTGAAAAAGCATGAGACAATTAG	91584	Hs.511454	GO:0004872|GO:0017154|GO:0007411|GO:0007275|GO:0007399|GO:0007165|GO:0016021|GO:0005622|GO:0005886|GO:0005886	NP_861440	Plexin A4	458.487	98.1307	8.93493	6.5458
ASHG19A3A037694	2.01763	1.01266	2.01763	up	coding	NM_001164586	IGFN1	RefSeq_coding	11810	chr1	+	201159952	201198079		CAGGGGTGCAGCAAGTGCTTTCTATGCGTTTCTTCATTAAAACATTAGGCTAATACAGGC	91156	Hs.519024	GO:0008150|GO:0030018|GO:0005737|GO:0005634|GO:0030017	NP_001158058	Immunoglobulin-like and fibronectin type III domain containing 1	111.523	61.7745	6.88016	5.8675
ASHG19A3A052341	3.3951	1.76346	3.3951	up	coding	NM_002960	S100A3	RefSeq_coding	738	chr1	-	153519808	153521734		GTGCACCAATGAGACCACGATGGGAAAGGGCCTATTTAACTCCTAATAAAAAACTGGCAT	6274	Hs.557609	GO:0005509|GO:0005515	NP_002951	S100 calcium binding protein A3	262.248	86.655	8.12013	6.35667
ASHG19A3A034329	2.18539	1.12789	2.18539	up	coding	NM_182595	POM121L12	RefSeq_coding	1284	chr7	+	53103348	53104617		GCTTGCTTTTTCTCCATGTCTCCCAGTTTGTATAGTTAAATTGTCCAGTTGTATAGTTAA	285877	Hs.381970		NP_872401	POM121 membrane glycoprotein-like 12	283.74	146.159	8.23528	7.10739
ASHG19A3A021741	2.8868	1.52947	2.8868	up	coding	NM_138786	TM4SF18	RefSeq_coding	3852	chr3	-	149036286	149051548		AGGATGAAGACCAGCTCAGCTCTTCAGTTGTTGATCATTGTCTATTGTTCTCCAAACAGT	116441	Hs.22026	GO:0016021|GO:0016020	NP_620141	Transmembrane 4 L six family member 18	135.717	52.7636	7.16573	5.63626
ASHG19A3A035510	8.49368	3.08639	8.49368	up	coding	NM_017884	PINX1	RefSeq_coding	1047	chr8	-	10622883	10697299		TAGTGAAAAAGAAGAAGAAGAAAGATTCCAAATGAATCCTTCCCAGCCGGGGCCTTCCGA	54984	Hs.490991	GO:0003676|GO:0005515|GO:0010521|GO:0070034|GO:0007080|GO:0008285|GO:0051972|GO:0000781|GO:0000777|GO:0005737|GO:0005622|GO:0043231|GO:0000776|GO:0005739|GO:0000228|GO:0005730|GO:0005634|GO:0005819	NP_060354	PIN2/TERF1 interacting, telomerase inhibitor 1	3684.43	489.824	11.9256	8.83923
ASHG19A3A048202	2.0398	1.02843	2.0398	up	coding	NM_001127215	GFI1	RefSeq_coding	2716	chr1	-	92940318	92949356		GTGTCAGTGGCGGCGGCGGCAACGACGGCGGGTTCGCGCCACCTGTCCAAGTGCCACCTG	2672	Hs.73172	GO:0003677|GO:0046872|GO:0010843|GO:0005515|GO:0008270|GO:0010956|GO:0010553|GO:0010957|GO:0000083|GO:0016032|GO:0005622|GO:0005634	NP_005254	Growth factor independent 1 transcription repressor	111.781	61.3172	6.88323	5.8548
ASHG19A3A027529	2.4503	1.29296	2.4503	up	coding	NM_001018077	NR3C1	RefSeq_coding	7286	chr5	-	142657496	142815077		GCCTGGCTCCTTTCCTCAAAGAACAAAGAAGACTTTGCTTCATTAAAGTGTCTGAGAAGG	2908	Hs.122926	GO:0003682|GO:0003690|GO:0004883|GO:0031072|GO:0046872|GO:0005515|GO:0032403|GO:0046982|GO:0042803|GO:0030971|GO:0043565|GO:0003700|GO:0005496|GO:0016563|GO:0008270|GO:0030325|GO:0006916|GO:0048096|GO:0010467|GO:0043402|GO:0008211|GO:0042921|GO:0060603|GO:0030512|GO:0043525|GO:0042127|GO:0031946|GO:0006111|GO:0034339|GO:0006355|GO:0046685|GO:0051789|GO:0007165|GO:0006366|GO:0006351|GO:0005737|GO:…	NP_001191194	Nuclear receptor subfamily 3, group C, member 1 (glucocorticoid receptor)	168.29	76.9822	7.47944	6.18648
ASHG19A3A053768	2.71343	1.44012	2.71343	up	coding	NM_024336	IRX3	RefSeq_coding	2308	chr16	-	54317211	54320378		ACGAGAAAGTATCTATTTTTGGCTAAATAAATGAGCTGCTGCCACTTTGACTATAACCCG	79191	Hs.499205	GO:0043565|GO:0003700|GO:0030528|GO:0007275|GO:0006355|GO:0005634	NP_077312	Iroquois homeobox 3	31201	12550.1	14.9832	13.5431
ASHG19A3A003713	2.4057	1.26646	2.4057	up	coding	NM_001173480	ARHGEF9	RefSeq_coding	5259	chrX	-	62854847	62975031		GTTTTGAGCTTCAACATGGCCTCGCTGTGATATCTCTGGGTGAACCAGGAGGATGAGGTG	23229	Hs.54697	GO:0005089|GO:0005085|GO:0006915|GO:0008624|GO:0034220|GO:0048011|GO:0035023|GO:0051056|GO:0007264|GO:0007268|GO:0055085|GO:0005737|GO:0005829|GO:0005829|GO:0005622	NP_056000	Cdc42 guanine nucleotide exchange factor (GEF) 9	292.832	136.895	8.2807	7.01424
ASHG19A3A018353	3.21371	1.68424	3.21371	up	coding	NM_003881	WISP2	RefSeq_coding	1433	chr20	+	43343884	43356451		GATCTCCTGCTGCCTTTTCTGGAGTTTGTAAAATTGTTCCTGAATACAAGCCTATGCGTG	8839	Hs.592145	GO:0005520|GO:0007155|GO:0007267|GO:0008285|GO:0001558|GO:0007165|GO:0009986|GO:0005737|GO:0005576|GO:0005886|GO:0005625	NP_003872	WNT1 inducible signaling pathway protein 2	12304.2	4249.02	13.6588	11.9746
ASHG19A3A053271	2.11622	1.08149	2.11622	up	coding	NM_001271	CHD2	RefSeq_coding	9374	chr15	+	93443550	93571236		TGATCCACAACAGCTGTGTGTCAGCAATGCAGGAATACGAAGAGCAGCTGAAAGAAAATG	1106	Hs.220864	GO:0005524|GO:0004003|GO:0003677|GO:0003682|GO:0004386|GO:0016787|GO:0000166|GO:0006333|GO:0006357|GO:0000785|GO:0005634	NP_001262	Chromodomain helicase DNA binding protein 2	228.257	120.481	7.91539	6.8339
ASHG19A3A035084	2.10907	1.07661	2.10907	up	coding	NM_014283	C1orf9	RefSeq_coding	5669	chr1	+	172502259	172580971		CTATCAATGCCGAATCATTGGGAAAATCAGGTTCAAATTTACCTATTTCTCCAAAAGAAC	51430	Hs.626306	GO:0007275|GO:0001503|GO:0005783|GO:0016021|GO:0016020|GO:0030867	NP_057311	Chromosome 1 open reading frame 9	306.879	164.226	8.35396	7.27735
ASHG19A3A031634	2.66573	1.41453	2.66573	up	coding	NM_023015	INTS3	RefSeq_coding	4538	chr1	+	153700566	153746557		TTTTATAGTCACTATCCACATGCCAGTGTGAAATGGGCATCTATGACGTGGTCAGGGTGT	65123	Hs.516522	GO:0005515|GO:0006281|GO:0031576|GO:0006974|GO:0010212|GO:0016180|GO:0070876|GO:0032039|GO:0005634	NP_075391	Integrator complex subunit 3	2204.08	937.456	11.1971	9.78253
ASHG19A3A046602	2.30126	1.20243	2.30126	up	coding	NM_006747	SIPA1	RefSeq_coding	3513	chr11	+	65405577	65418391		GCGGGAGAGCGGCAGCGGGACCCCAGCGCGGGCGGCGGCGGCTGGGCGGGAGCCCCAGAG	6494	Hs.530477	GO:0005096|GO:0046582|GO:0008283|GO:0007010|GO:0035556|GO:0007162|GO:0045786|GO:0030308|GO:0051056|GO:0007165|GO:0005737|GO:0005829|GO:0012505|GO:0005622|GO:0016020|GO:0048471	NP_694985	Signal-induced proliferation-associated 1	279.35	136.502	8.21293	7.0105
ASHG19A3A028437	2.56461	1.35874	2.56461	up	coding	NM_003248	THBS4	RefSeq_coding	3233	chr5	+	79331169	79379105		TGGCGTTTTCTGCTTCTCTCAAGAAAACATCATCTGGTCCAACCTCAAGTATCGCTGCAA	7060	Hs.211426	GO:0005509|GO:0008201|GO:0005178|GO:0005198|GO:0007155|GO:0071603|GO:0051451|GO:0016525|GO:0001938|GO:0090023|GO:0050731|GO:0005604|GO:0005576|GO:0005615	NP_003239	Thrombospondin 4	439.511	194.297	8.87696	7.51822
ASHG19A3A055042	2.45655	1.29663	2.45655	up	coding	NM_001100812	CXCL16	RefSeq_coding	1466	chr17	-	4637804	4643223		TATTCTTACAAAAAGTGTAATAAAGGAGACTGACCCCTGACAACATGGTAGGCACTGTAT	58191	Hs.513885	GO:0008009|GO:0008009|GO:0005041|GO:0005102|GO:0005044|GO:0006935|GO:0048247|GO:0030307|GO:0030335|GO:0006898|GO:0034097|GO:0034341|GO:0034612|GO:0005576|GO:0005576|GO:0005576|GO:0005615|GO:0016021|GO:0016020|GO:0005886	NP_071342	Chemokine (C-X-C motif) ligand 16	2186.81	1005.79	11.1864	9.88978
ASHG19A3A035118	2.24807	1.16869	2.24807	up	coding	NM_178422	PAQR7	RefSeq_coding	3058	chr1	-	26187975	26197744		ACAAAGGCTTTGATATCAGAATGAACTGTCAAGGGAGGTGCTGGAGAGGGATTAACCTGT	164091	Hs.523652	GO:0004872|GO:0005496|GO:0030154|GO:0007275|GO:0048477|GO:0016021|GO:0005886	NP_848509	Progestin and adipoQ receptor family member VII	387.478	194.841	8.69084	7.52215
ASHG19A3A049334	4.94441	2.3058	4.94441	up	coding	NM_001007538	SHISA2	RefSeq_coding	2889	chr13	-	26618734	26625198		GTTGGCAATTGGTATCATCAATGATACTCATTTTTTAATAACCAAAGGCAGGGGAAAATC	387914	Hs.433791	GO:0007275|GO:0005783|GO:0005789|GO:0016021|GO:0016020	NP_001007539	Shisa homolog 2 (Xenopus laevis)	10566.9	2397.39	13.443	11.1372
ASHG19A3A025685	4.10489	2.03734	4.10489	up	coding	NM_001657	AREG	RefSeq_coding	1270	chr4	+	75480628	75490482		TTAGCAGCCATAGCTGCCTTTATGTCTGCTGTGATCCTCACAGCTGTTGCTGTTATTACA	374	Hs.270833		NP_001648	Amphiregulin	1337.66	368.371	10.4716	8.43426
ASHG19A3A031108	2.77191	1.47088	2.77191	up	coding	NM_003522	HIST1H2BF	RefSeq_coding	430	chr6	+	26199786	26200215		ACCAGCTCTAAGTAATTCTAACGTCTTCATACCCAATCCCAAAGGCTCTTTTAAGAGCCA	8343	Hs.182137		NP_003513	Histone cluster 1, H2bf	198.946	80.3375	7.71971	6.24883
ASHG19A3A044312	2.41597	1.27261	2.41597	up	coding	NM_005097	LGI1	RefSeq_coding	2366	chr10	+	95517565	95557915		TAATGCTTTATGTGAGAATGCCAGATCCATTCCACGCACCGTTCCTCCTGATGTTATCTC	9211	Hs.533670	GO:0005515|GO:0005102|GO:0005102|GO:0007411|GO:0008283|GO:0007399|GO:0031175|GO:0030307|GO:0050806|GO:0051260|GO:0030054|GO:0005576|GO:0005615|GO:0005615|GO:0045202	NP_005088	Leucine-rich, glioma inactivated 1	1159.44	545.866	10.2691	8.99645
ASHG19A3A021379	2.49737	1.32041	2.49737	up	coding	NM_001025079	CD47	RefSeq_coding	5313	chr3	-	107761940	107809935		TTGTTGCTGGACTAGTGATCACTGTCATTGTCATTGTTGGAGCCATTCTTTTCGTCCCAG						25498	11201.3	14.6997	13.3793
ASHG19A3A010187	2.0437	1.03118	2.0437	up	coding	NM_005406	ROCK1	RefSeq_coding	6650	chr18	-	18529704	18691812		TGAAAAAATGGACAACCTGCTGCGGGATCCCAAATCGGAAGTGAATTCGGATTGTTTGCT	6093	Hs.306307	GO:0005524|GO:0017049|GO:0042802|GO:0046872|GO:0000166|GO:0005515|GO:0004672|GO:0004674|GO:0007266|GO:0030036|GO:0006915|GO:0007411|GO:0032060|GO:0006921|GO:0000910|GO:0035556|GO:0007159|GO:0050900|GO:0050901|GO:0022614|GO:0043524|GO:0006468|GO:0007165|GO:0005794|GO:0000139|GO:0005814|GO:0005737|GO:0005856|GO:0005829|GO:0005829|GO:0005622|GO:0016020	NP_005397	Rho-associated, coiled-coil containing protein kinase 1	187.218	101.83	7.63044	6.59925
ASHG19A3A054626	2.45543	1.29598	2.45543	up	coding	NM_005949	MT1F	RefSeq_coding	456	chr16	+	56691854	56693214		CCCATTTGCTACATTCCTTTTCCTGTGAAATATGTGAGTGATAATTAAACACTTTAGACC	4494	Hs.513626	GO:0046870|GO:0005507|GO:0046872|GO:0008270|GO:0008150|GO:0005737	NP_005940	Metallothionein 1F	7861.8	3543.91	13.0139	11.7179
ASHG19A3A006728	3.32644	1.73398	3.32644	up	coding	NM_197955	C15orf48	RefSeq_coding	815	chr15	+	45722762	45725645		TCCGTGCGCACCGCCCGGCGTCCAGATTTGGCAATTCTTCGCTGAAGTCATCATGAGCTT	84419	Hs.112242	GO:0005739|GO:0005634	NP_922946	Chromosome 15 open reading frame 48	752.508	254.78	9.6459	7.91191
ASHG19A3A014085	2.40794	1.2678	2.40794	up	coding	NM_005101	ISG15	RefSeq_coding	685	chr1	+	948846	949915		TAAGGGCCTCCACCAGCATCCGAGCAGGATCAAGGGCCGGAAATAAAGGCTGTTGTAAAG	9636	Hs.458485	GO:0005515|GO:0031386|GO:0032020|GO:0007267|GO:0019221|GO:0044419|GO:0019941|GO:0032480|GO:0009615|GO:0060337|GO:0005737|GO:0005829|GO:0005576|GO:0005615	NP_005092	ISG15 ubiquitin-like modifier	97282.1	41318.1	16.5485	15.2807
ASHG19A3A054915	2.01819	1.01306	2.01819	up	coding	NM_004933	CDH15	RefSeq_coding	2875	chr16	+	89238162	89261899		ATGAAAGACAGCAACCTCCTGGGTAAATCTGAATGAAAAACGTGCTAGTCTCTTTCATGC	1013	Hs.148090	GO:0005509|GO:0034332|GO:0007155|GO:0034329|GO:0045216|GO:0007156|GO:0042692|GO:0051149|GO:0016021|GO:0031594|GO:0005886|GO:0005886	NP_004924	Cadherin 15, type 1, M-cadherin (myotubule)	165.002	91.2629	7.44931	6.43624
ASHG19A3A037091	2.09727	1.06851	2.09727	up	coding	NM_018465	C9orf46	RefSeq_coding	926	chr9	-	5357972	5437860	BC036853,	ACAAATGGCCATGCAGATTGCGTGGTCTCGGGAATTCCTCAAATATTTTGGAACTTTTTT	55848	Hs.584242	GO:0016021|GO:0016020|GO:0005739	NP_060935	Chromosome 9 open reading frame 46	3140.65	1670.72	11.6897	10.6212
ASHG19A3A039134	2.31507	1.21105	2.31507	up	coding	NM_134427	RGS3	RefSeq_coding	1582	chr9	+	116327360	116360017		AACCACAGAGTTTTCTGTTTAATGGAAGAAAGAAATCCAGCCTCTCTCCAGAGTGGCGGT	5998	Hs.494875	GO:0005096|GO:0004871|GO:0000188|GO:0009968|GO:0008277|GO:0005737|GO:0005829|GO:0005634|GO:0005886	NP_652760	Regulator of G-protein signaling 3	171.363	82.823	7.50425	6.2932
ASHG19A3A002113	6.0104	2.58746	6.0104	up	coding	NM_001128934	SYNPO2	RefSeq_coding	4866	chr4	+	119809995	119959668		CAAGAAAAGTGGTGTCACAATTCAGGTGAAATGTAAATCTGGGATCCATAGTCAAGATAT	171024	Hs.655519	GO:0071889|GO:0003779|GO:0051371|GO:0030018|GO:0005737|GO:0005634	NP_597734	Synaptopodin 2	392.495	73.6091	8.70883	6.12137
ASHG19A3A009364	2.36903	1.2443	2.36903	up	coding	NM_001128147	NF1	RefSeq_coding	2939	chr17	+	29421944	29549782		ATCTTATAAGAATGGGTGTGCTAAGTTACTTGGCAGCTGAATTAAACCTTACTCTAGAGT	4763	Hs.113577	GO:0005099|GO:0005515|GO:0000165|GO:0007265|GO:0014044|GO:0030036|GO:0030325|GO:0048844|GO:0007420|GO:0048593|GO:0007154|GO:0021987|GO:0050890|GO:0030199|GO:0030198|GO:0021897|GO:0048853|GO:0007507|GO:0001889|GO:0001656|GO:0022011|GO:0043407|GO:0043409|GO:0043409|GO:0030336|GO:0001937|GO:0007406|GO:0048715|GO:0006469|GO:0042992|GO:0001649|GO:0007422|GO:0014065|GO:0043473|GO:0032320|GO:0032320|GO:…	NP_001121619	Neurofibromin 1	299.85	142.91	8.31831	7.07401
ASHG19A3A052518	2.44565	1.29022	2.44565	up	coding	NM_001007156	NTRK3	RefSeq_coding	3997	chr15	-	88520595	88799661		GGGCGTTGTGTTTCCACAGAGACTTATAGGAGTGTTCAGTGTATAGTTTCTTAATAAACA	4916	Hs.410969	GO:0005524|GO:0043121|GO:0005030|GO:0000166|GO:0016740|GO:0004714|GO:0030154|GO:0071300|GO:0090102|GO:0042490|GO:0019056|GO:0007275|GO:0048712|GO:0060548|GO:0007399|GO:0048665|GO:0001764|GO:0048691|GO:0046777|GO:0048678|GO:0051412|GO:0045471|GO:0006950|GO:0007169|GO:0005737|GO:0005887|GO:0005624|GO:0005886	NP_002521	Neurotrophic tyrosine kinase, receptor, type 3	149.475	68.4325	7.30904	6.01882
ASHG19A3A043843	2.5127	1.32924	2.5127	up	coding	NM_022157	RRAGC	RefSeq_coding	1442	chr1	-	39305014	39325340		ATCACAAAATAGAAACACAGAGGGACATTCATCAAAGGGCCAATGATGACCTTGCAGATG	64121	Hs.532461	GO:0019003|GO:0005525|GO:0003924|GO:0000287|GO:0000166|GO:0005515|GO:0046982|GO:0006184|GO:0008380|GO:0006915|GO:0016049|GO:0034613|GO:0071230|GO:0032008|GO:0007264|GO:0005737|GO:0005764|GO:0005634	NP_071440	Ras-related GTP binding C	1732.13	780.889	10.8509	9.52168
ASHG19A3A044081	3.2498	1.70035	3.2498	up	coding	NM_001171932	CDH23	RefSeq_coding	1746	chr10	+	73156690	73377361		AAACAAACATTGCGGCACCCCACTCCTGGTAGGTTCTGAGGATAAATAAGGCTGAAAAAA	64072	Hs.656032	GO:0005509|GO:0005515|GO:0006816|GO:0016339|GO:0007155|GO:0051480|GO:0050957|GO:0007156|GO:0045494|GO:0050896|GO:0050953|GO:0007605|GO:0016021|GO:0016020|GO:0005886|GO:0032420	NP_443068	Cadherin-related 23	261.789	90.1915	8.11822	6.41787
ASHG19A3H0000524	2.57121	1.36245	2.57121	up	coding	NM_024017_intron2+	NM_024017	HOX cluster	2616	chr17	+	46700497	46703114		AGGCTTCCTCAGCACTTCCAAAGCTCTGCCTACATCAAGTTCCCTCTCAATTTTTCTCTA						590.106	259.403	9.29703	7.93458
ASHG19A3A040535	3.27234	1.71032	3.27234	up	coding	NM_001080848	CSAG2	RefSeq_coding	847	chrX	-	151876743	151877747	NM_001129828,NM_001129826,	TTTACACCCCAAAGAGTGTGCCCCATGGTGATGAAAATAAAGTGAACATGTTGCAAAATG	728461	Hs.721609	GO:0042493	NP_004900	CSAG family, member 2	187.359	63.9774	7.6314	5.92108
ASHG19A3A006556	3.08864	1.62697	3.08864	up	coding	NM_181526	MYL9	RefSeq_coding	1044	chr20	+	35169896	35178226		CTGCACGACATGCTGGCCTCGCTGGGTTTCATCCATGAGGACCACCTCCGGGAGCTGCTC	10398	Hs.504687	GO:0005509|GO:0003774|GO:0008307|GO:0007411|GO:0006936|GO:0006937|GO:0005829|GO:0005859|GO:0016459	NP_852667	Myosin, light chain 9, regulatory	227.908	82.3887	7.91348	6.28651
ASHG19A3A050923	2.06328	1.04494	2.06328	up	coding	NM_016468	COX16	RefSeq_coding	1713	chr14	-	70791798	70826444		AAATAACCAAGGAAAAGGAAGTGAGTTAAGGACGTACTCGTCTTGGTGAGAGCGTGAGCT	51241	Hs.709581	GO:0016021|GO:0016020|GO:0031966|GO:0005739	NP_057552	COX16 cytochrome c oxidase assembly homolog (S. cerevisiae)	344.253	188.374	8.51769	7.47276
ASHG19A3A020725	2.91681	1.54439	2.91681	up	coding	NM_018306	TMEM40	RefSeq_coding	1710	chr3	-	12775391	12800808		ACCAAGCCAGACCAATAAACAGAACACTTTTCCTTCCATGTGGTCTGAATGTTGGCACCA	55287	Hs.475502	GO:0016021|GO:0016020	NP_060776	Transmembrane protein 40	436.871	169.932	8.86848	7.32409
ASHG19A3A023707	2.36059	1.23915	2.36059	up	coding	NM_002182	IL1RAP	RefSeq_coding	4801	chr3	+	190231839	190369307	NM_001167929,NM_001167928,	GGACGTTCCATGCCCAGGTTAACAAAGAACTGTGATATATAGAGTGTCTAATTACAAAAT	3556	Hs.478673	GO:0004908|GO:0005515|GO:0004871|GO:0004888|GO:0019221|GO:0006955|GO:0006954|GO:0045087|GO:0042094|GO:0006461|GO:0007165|GO:0005576|GO:0005887|GO:0005886|GO:0005886	NP_608273	Interleukin 1 receptor accessory protein	2311.6	1104.85	11.2649	10.0258
ASHG19A3A002945	2.30341	1.20377	2.30341	up	coding	NM_001146259	PIP4K2C	RefSeq_coding	3175	chr12	+	57984941	57997210		CTTTAAGGCCAGCTCCAAGATCAAGGAGTATTGTCCCCAGGTCTTCAGGAACCTCCGTGA	79837	Hs.144502	GO:0016309|GO:0005524|GO:0042802|GO:0016301|GO:0000166|GO:0016740|GO:0005737|GO:0016020	NP_079055	Phosphatidylinositol-5-phosphate 4-kinase, type II, gamma	302.454	148.153	8.3323	7.12853
ASHG19A3A001266	6.67811	2.73944	6.67811	up	coding	NM_001037671	C12orf74	RefSeq_coding	1748	chr12	+	93096742	93102324		CACCCTACGACACCCTAGTCCTCAGGGAGAAGAATTGCACCCATCCAGGTGTGTATGCAT	338809	Hs.326303		NP_001171568	Chromosome 12 open reading frame 74	393.333	66.2821	8.7119	5.97246
ASHG19A3A049028	2.68229	1.42346	2.68229	up	coding	NM_000431	MVK	RefSeq_coding	2087	chr12	+	110011499	110035070		ACCTGAGAGGTTTGTGGAAAAGATGGCAAATGGGGAATAAAAAGATTTTGTGTCAACAGT	4598	Hs.130607	GO:0005524|GO:0042802|GO:0004496|GO:0004496|GO:0000166|GO:0016740|GO:0006695|GO:0008299|GO:0008152|GO:0005737|GO:0005829|GO:0005777	NP_001107657	Mevalonate kinase	17432.4	7232.4	14.1662	12.7428
ASHG19A3A054753	3.52646	1.81822	3.52646	up	coding	NM_199424	WWP2	RefSeq_coding	3690	chr16	+	69958900	69975643		GATTGATTTTTTCACCAGTGGCTTTTTGTAACCTCTGTGTTCTGCTGTGTTTCTTGTGTT	11060	Hs.408458	GO:0001085|GO:0001085|GO:0016881|GO:0016874|GO:0005515|GO:0008134|GO:0004842|GO:0004842|GO:0046718|GO:0044419|GO:0010629|GO:0010553|GO:0010553|GO:0051224|GO:0043433|GO:0032410|GO:0043161|GO:0070534|GO:0006464|GO:0016567|GO:0016567|GO:0016567|GO:0042787|GO:0005737|GO:0005622|GO:0005634|GO:0000151	NP_955456	WW domain containing E3 ubiquitin protein ligase 2	406.918	130.28	8.76323	6.94501
ASHG19A3A043123	2.03949	1.02821	2.03949	up	coding	NM_145246	C10orf4	RefSeq_coding	3089	chr10	-	95427640	95462329		TCAGAAAGAAAAACATGGAAAGGTGGCCCATAAACAAGTTGCAGCAGAATTGCTGGATAG	118924	Hs.586650	GO:0005515|GO:0005634	NP_660289	Fragile site, folic acid type, rare, fra(10)(q23.3) or fra(10)(q24.2) candidate 1	2075.44	1148.83	11.11	10.0818
ASHG19A3A001036	2.10656	1.07489	2.10656	up	coding	NM_001017528	PRR5	RefSeq_coding	1677	chr22	+	45064592	45133561		CGGCGGCGGCGGCGCGGGGACCGAGGTTGAAGTTCATGAGTTCGCCCAGCCTCAGTGACC	55615	Hs.102336	GO:0007049	NP_851850	Proline rich 5 (renal)	276.022	147.396	8.1951	7.12021
ASHG19A3A006932	2.06004	1.04267	2.06004	up	coding	NM_201598	FAM86A	RefSeq_coding	2272	chr16	-	5134300	5147789	NR_024254,ENST00000484945,	CTTTCTCTCAGAACTCATCAAAAAGCCCTCGGGAGGCTCGGTCACACTCTCCGAGAGCAC	196483	Hs.406461		NP_963892	Family with sequence similarity 86, member A	699.74	384.175	9.53941	8.49673
ASHG19A3A015335	4.61599	2.20664	4.61599	up	coding	NM_021643	TRIB2	RefSeq_coding	4408	chr2	+	12856997	12882856		TTCTTGTATCGGGAAATACTTATTGTTGGAACCTCTGGAGGGAGACCACGTTTTTCGTGC	28951	Hs.467751	GO:0005524|GO:0000166|GO:0004672|GO:0004860|GO:0008134|GO:0016772|GO:0031625|GO:0055106|GO:0045599|GO:0045081|GO:0006469|GO:0032436|GO:0006468|GO:0043405|GO:0005737|GO:0005737|GO:0005856|GO:0005730|GO:0005634	NP_067675	Tribbles homolog 2 (Drosophila)	260.518	63.1644	8.10927	5.90263
ASHG19A3A040409	2.07356	1.05211	2.07356	up	coding	NM_021183	RAP2C	RefSeq_coding	3933	chrX	-	131337053	131352189		AGTGTTGTACAACTTGTGTCGTCCAGTAAAGAAGATAACCTCAATCATGGCCATACCGAG	57826	Hs.119889	GO:0005525|GO:0003924|GO:0000166|GO:0032486|GO:0030336|GO:0031954|GO:0061097|GO:0007165|GO:0007264|GO:0005737|GO:0005829|GO:0005622|GO:0016020|GO:0055038	NP_067006	RAP2C, member of RAS oncogene family	1238.38	676.65	10.3621	9.30998
ASHG19A3A006262	4.15052	2.05329	4.15052	up	coding	NM_170604	RASGRP4	RefSeq_coding	3235	chr19	-	38899697	38916945	NM_001146205,NM_001146202,	CCACCTGAGCCCTGACAGCACCAAGGCCCTCCTGGAGCTCACTGAGCTCCTTGCCTCCCA	115727	Hs.130434	GO:0030742|GO:0005088|GO:0019992|GO:0046872|GO:0007202|GO:0016049|GO:0008283|GO:0030099|GO:0046579|GO:0008277|GO:0051056|GO:0009991|GO:0007169|GO:0005737|GO:0005622|GO:0005624|GO:0005886|GO:0005625	NP_733749	RAS guanyl releasing protein 4	1330.52	362.082	10.4642	8.41093
ASHG19A3A041182	2.06251	1.0444	2.06251	up	coding	NM_001039840	CHIC1	RefSeq_coding	6909	chrX	+	72782983	72906935		AAACCAGCATTGGCCGTGTGAATGCATGTTTGAAAAAGGCTCTCCCGGTCAATGTGAAAT	53344	Hs.496323	GO:0016023|GO:0005886	NP_001034929	Cysteine-rich hydrophobic domain 1	315.384	172.715	8.39274	7.34835
ASHG19A3A041384	2.26503	1.17953	2.26503	up	coding	NM_000495	COL4A5	RefSeq_coding	6427	chrX	+	107683153	107940775		ACTACTATGCCAACTCCTACAGCTTTTGGCTGGCAACTGTAGATGTGTCAGACATGTTCA	1287	Hs.369089	GO:0005201|GO:0005515|GO:0007411|GO:0005581|GO:0005587|GO:0005576	NP_203699	Collagen, type IV, alpha 5	738.265	370.03	9.61981	8.44027
ASHG19A3A001047	2.00674	1.00485	2.00674	up	coding	NM_001018005	TPM1	RefSeq_coding	1246	chr15	+	63334837	63358291		GGACCACGCTCTCAACGATATGACTTCCATATAAGTTTCTTTGCTTCACTTCTCCCAAGA	7168	Hs.133892	GO:0003779|GO:0005200|GO:0008307|GO:0060048|GO:0006928|GO:0034614|GO:0007010|GO:0006936|GO:0030049|GO:0030049|GO:0030336|GO:0032781|GO:0045785|GO:0003065|GO:0051496|GO:0008016|GO:0006937|GO:0031529|GO:0045214|GO:0055010|GO:0042060|GO:0015629|GO:0032059|GO:0005737|GO:0005856|GO:0005829|GO:0005862|GO:0032587|GO:0030017|GO:0001725	NP_001018020	Tropomyosin 1 (alpha)	3934.12	2201	12.0152	11.0103
ASHG19A3A031801	2.43371	1.28316	2.43371	up	coding	NM_015021	ZNF292	RefSeq_coding	10100	chr6	+	87865268	87973404		CCGACCTTATCTTACCTCTGAATGTGAAAATGTAGCCTTGGTTCTGGAACGCTTGGCATT	23036	Hs.485892	GO:0003677|GO:0046872|GO:0008270|GO:0005622|GO:0005634	NP_055836	Zinc finger protein 292	180	82.8059	7.57613	6.29297
ASHG19A3A038176	4.81315	2.26698	4.81315	up	coding	NM_001080515	FAM163B	RefSeq_coding	501	chr9	-	136444144	136445345		CATCTTGGCGACTGTGATTTTGCTCTGCATCATCGCTGTTCTGTGCTACTGCCGGCTCCA	642968	Hs.709706	GO:0016021|GO:0016020	NP_001073984	Family with sequence similarity 163, member B	305.554	71.5408	8.34805	6.08107
ASHG19A3A044366	2.74148	1.45495	2.74148	up	coding	NM_001010917	GOLGA7B	RefSeq_coding	2894	chr10	+	99609995	99627781		GGTTGGACTGAAAGCGAGGCCAAAAGTAATCAATTAATGATATCAATAAATCCTCATTTC	401647	Hs.567524	GO:0005794|GO:0000139|GO:0016020	NP_001010917	Golgin A7 family, member B	457.627	189.084	8.93313	7.47818
ASHG19A3A017316	3.17363	1.66613	3.17363	up	coding	NM_002592	PCNA	RefSeq_coding	1355	chr20	-	5095599	5107268		CCGGAGGCTCTAGCCTGACAAATGCTTGCTGACCTGGGCCAGAGCTCTTCCCTTACGCAA	5111	Hs.147433	GO:0003677|GO:0030337|GO:0032405|GO:0032139|GO:0005515|GO:0000701|GO:0006281|GO:0006281|GO:0006260|GO:0006271|GO:0000082|GO:0000084|GO:0006284|GO:0006287|GO:0008283|GO:0007507|GO:0006886|GO:0006298|GO:0000278|GO:0006289|GO:0006297|GO:0048015|GO:0032077|GO:0006275|GO:0000083|GO:0046686|GO:0033993|GO:0000723|GO:0000722|GO:0032201|GO:0006283|GO:0019985|GO:0005663|GO:0043626|GO:0070557|GO:0000307|GO:…	NP_872590	Proliferating cell nuclear antigen	267.875	94.2341	8.1512	6.48506
ASHG19A3A001412	3.81194	1.93052	3.81194	up	coding	NM_001042444	CAST	RefSeq_coding	4234	chr5	+	96038495	96110383	NM_001042441,NM_001042440,	TGAGAAGAAGTCACAGTCAACCAAGCCAAAAAGCCTACCCAAGCAGGCATCAGATACAGG						2414.62	715.674	11.3237	9.39319
ASHG19A3A038295	2.3133	1.20995	2.3133	up	coding	NM_015158	KANK1	RefSeq_coding	5083	chr9	+	504702	746103		TAAAATTTGCATGACTCCTCACTCCTTTCTGGATCTCTCATTGGACTCAAGCCAGCATGG	23189	Hs.306764	GO:0030837|GO:0005737	NP_694856	KN motif and ankyrin repeat domains 1	225.46	108.402	7.89773	6.68778
ASHG19A3A032361	2.58338	1.36926	2.58338	up	coding	NM_003194	TBP	RefSeq_coding	1921	chr6	+	170863420	170881957		TTCTGGTTTGCCAAGAAGAAAGTGAACATCATGGATCAGAACAACAGCCTGCCACCTTAC	6908	Hs.590872	GO:0003677|GO:0003702|GO:0016251|GO:0016251|GO:0010843|GO:0005515|GO:0070491|GO:0003700|GO:0008134|GO:0008219|GO:0010467|GO:0032568|GO:0044419|GO:0006355|GO:0007283|GO:0006368|GO:0006366|GO:0006383|GO:0006383|GO:0006367|GO:0006367|GO:0006367|GO:0016032|GO:0005737|GO:0001939|GO:0001940|GO:0005654|GO:0005654|GO:0005672|GO:0005669	NP_003185	TATA box binding protein	854.839	374.392	9.828	8.45874
ASHG19A3A034706	6.4213	2.68286	6.4213	up	coding	NM_021167	GATAD1	RefSeq_coding	3955	chr7	+	92076764	92088742		ACTATGCTCAAATCAGAGGTTTTATCCAGGACCAGTATTGCGAGAAGAGTGCAGCACTGA	57798	Hs.21145	GO:0046872|GO:0043565|GO:0003700|GO:0008270|GO:0006355	NP_066990	GATA zinc finger domain containing 1	3764.27	659.715	11.957	9.27414
ASHG19A3A008355	2.2466	1.16774	2.2466	up	coding	NM_018143	KLHL11	RefSeq_coding	2326	chr17	-	40009798	40021629		AGAGTTAAAAACTAAAGAATGGGAGACTCAGTTCAATACATGGTCATTTTGTTAGCTTGC	55175	Hs.592134	GO:0005576	NP_060613	Kelch-like 11 (Drosophila)	206.262	102.436	7.77462	6.60688
ASHG19A3A006929	2.67047	1.41709	2.67047	up	coding	NM_201569	SMG7	RefSeq_coding	4789	chr1	+	183441505	183523327		TGCTGTCCTCATGGAAAGCCTAAAGAAGCAACAGCATGGGGTCCAGCAGTTGGGGCCCAA	9887	Hs.591463	GO:0005515|GO:0051721|GO:0006406|GO:0000184|GO:0035303|GO:0005737|GO:0045111|GO:0005634	NP_963863	Smg-7 homolog, nonsense mediated mRNA decay factor (C. elegans)	750.368	317.655	9.64095	8.22385
ASHG19A3A001107	2.20889	1.14332	2.20889	up	coding	NM_001024940	TRIM17	RefSeq_coding	2049	chr1	-	228595637	228604583		GCTGTGCGGGCCCCCCTTCCCCGCGGAGCCATGGAGGCTGTGGAACTCGCCAGAAAACTG	51127	Hs.121748	GO:0016874|GO:0046872|GO:0005515|GO:0004842|GO:0008270|GO:0051865|GO:0005575|GO:0005622	NP_057186	Tripartite motif-containing 17	1751.38	898.305	10.8659	9.7226
ASHG19A3A019492	3.51135	1.81202	3.51135	up	coding	NM_001160042	IQCC	RefSeq_coding	2293	chr1	+	32671235	32674288		AAATCATGGGGTCTCGTACCTGGACCTCCCAGCGAGATGCTACCACGTTCAGTCCCCTAA	55721	Hs.274356		NP_060604	IQ motif containing C	225.689	71.8665	7.89961	6.08758
ASHG19A3A048621	2.08047	1.05691	2.08047	up	coding	NM_002284	KRT86	RefSeq_coding	2091	chr12	+	52695648	52702945		CTGCCTTCTCCTTTGTCTTTGTTTCACTCTGTGTTTCCAATAAACTCATTGTAGCGAATC	3892	Hs.278658	GO:0005198|GO:0007010|GO:0005882|GO:0045095	NP_002275	Keratin 86	2037.28	1104.23	11.0821	10.0252
ASHG19A3A009756	2.22958	1.15677	2.22958	up	coding	NM_080588	PTPN7	RefSeq_coding	3263	chr1	-	202116142	202129119		TCAGAGATGGCTTCTGCGTGCTTTCTCCCTTCCGTCCTAGAGAACACATATTTTCTGTTT	5778	Hs.402773	GO:0016787|GO:0005515|GO:0004725|GO:0006470|GO:0005737|GO:0005829|GO:0009898	NP_542155	Protein tyrosine phosphatase, non-receptor type 7	3348.51	1673.38	11.7806	10.6238
ASHG19A3A044343	2.60879	1.38338	2.60879	up	coding	NM_032440	LCOR	RefSeq_coding	10390	chr10	+	98592711	98724198		GCAGCGGCTGCACTTCCTCAGCGGGCGGCGGTGGCCGGGGAGTTAATCCTCGACGCACGG	84458	Hs.729136	GO:0003677|GO:0003702|GO:0003700|GO:0008134|GO:0000122|GO:0005634	NP_115816	Ligand dependent nuclear receptor corepressor	213.481	91.4786	7.82422	6.44084
ASHG19A3A021697	2.18893	1.13023	2.18893	up	coding	NM_001042604	XRN1	RefSeq_coding	10053	chr3	-	142025450	142166853		TGAACAGCTTCTTGCTGTACTTCCAGCAGCCAGCAAAAATTTACTTCCTGCATGCTACCA	54464	Hs.435103	GO:0008409|GO:0003677|GO:0003723|GO:0016787|GO:0005515|GO:0016070|GO:0043928|GO:0071044|GO:0016071|GO:0071028|GO:0000956|GO:0000288|GO:0006139|GO:0016075|GO:0005794|GO:0005737|GO:0005829|GO:0045111|GO:0005622|GO:0005886	NP_061874	5'-3' exoribonuclease 1	121.002	61.937	7.00174	5.87151
ASHG19A3A003209	3.69947	1.88732	3.69947	up	coding	NM_001164315	ANKRD36	RefSeq_coding	6269	chr2	+	97779232	97930255		TTCTCAGAAACCACCAACCTTGAAGGGTACAAGTGACGAGGAAGATTCTGTTTTGGGTAT	375248	Hs.541894		NP_001157787	Ankyrin repeat domain 36	3816.36	1154.13	11.9759	10.0886
ASHG19A3A039965	2.34713	1.2309	2.34713	up	coding	NM_001010862	SPIN3	RefSeq_coding	4479	chrX	-	57017263	57021988		GTTCTCCAATCCAGCTCTATCAGCTATAAAGCTGGTATCTATTTTGATTCTTTTTTACAG	169981	Hs.522672	GO:0007276	NP_001010862	Spindlin family, member 3	796.003	383.388	9.72467	8.49377
ASHG19A3A002763	3.53458	1.82154	3.53458	up	coding	NM_001145147	CRHR1	RefSeq_coding	2474	chr17	+	43861645	43913193		AGAGCCTGTCCCTGGCCAGCAACATCTCAGACAATGGCTACCGGGAGTGCCTGGCCAATG	1394	Hs.417628	GO:0015056|GO:0043404|GO:0042277|GO:0007186|GO:0007188|GO:0007190|GO:0007189|GO:0007200|GO:0048266|GO:0042755|GO:0007204|GO:0007565|GO:0006955|GO:0007613|GO:0032099|GO:0007218|GO:0043526|GO:0007567|GO:0048167|GO:0001666|GO:0008542|GO:0045177|GO:0033267|GO:0030425|GO:0005887|GO:0005771|GO:0043025|GO:0005886|GO:0005886|GO:0005802|GO:0031982	NP_004373	Corticotropin releasing hormone receptor 1	263.923	83.6556	8.12863	6.30709
ASHG19A3A003735	2.83568	1.5037	2.83568	up	coding	NM_001174066	FGFR1	RefSeq_coding	4954	chr8	-	38268656	38325363	NM_001174065,	CTGGCGAGGCGGCGGCGGCTCCTCAGGTCAGTTTGAAAAGGAGGATCGAGCTCACTGTGG	2260	Hs.264887	GO:0005524|GO:0050839|GO:0005007|GO:0005007|GO:0005007|GO:0001948|GO:0008201|GO:0000166|GO:0005515|GO:0032403|GO:0042803|GO:0004713|GO:0004713|GO:0004872|GO:0016740|GO:0000165|GO:0001525|GO:0007411|GO:0060445|GO:0016049|GO:0048469|GO:0021954|GO:0002062|GO:0030326|GO:0008543|GO:0008543|GO:0008543|GO:0008543|GO:0008543|GO:0008543|GO:0048699|GO:0001701|GO:0042472|GO:0008286|GO:0060484|GO:0048762|GO:…	NP_075598	Fibroblast growth factor receptor 1	293.66	116.082	8.28575	6.78205
ASHG19A3A037767	2.05659	1.04026	2.05659	up	coding	NM_153698	C9orf21	RefSeq_coding	1242	chr9	-	99403533	99417599		CCTGTTGAATTGCATGCTGGGAAGCATCAGTTGTCAAAATATGTTATATACTTCCATTTT	195827	Hs.44640	GO:0016209|GO:0016491	NP_714542	Chromosome 9 open reading frame 21	4184.36	2278.31	12.1042	11.0639
ASHG19A3A014755	6.94067	2.79507	6.94067	up	coding	NM_001032281	TFPI	RefSeq_coding	1166	chr2	-	188343304	188419219		GTGCTTTTGGCATTTCCTTAATATTTATATGTATACGTGATGCCTTTGATAGCATACTGC	7035	Hs.516578	GO:0004866|GO:0004867|GO:0007596|GO:0007598|GO:0010951|GO:0005576|GO:0005615|GO:0005886	NP_006278	Tissue factor pathway inhibitor (lipoprotein-associated coagulation inhibitor)	1321.66	214.155	10.4554	7.66033
ASHG19A3A028490	2.05497	1.03912	2.05497	up	coding	NM_152696	HIPK1	RefSeq_coding	3438	chr1	+	114471995	114514693		TGTTGTTACTTTCTGGAGAACCCTGCTTCTGGCTGGATGCTGAATAAAGCCAAATGAAGC	204851	Hs.532363	GO:0005524|GO:0000166|GO:0005515|GO:0004674|GO:0016740|GO:0006468|GO:0005737|GO:0005634	NP_938010	Homeodomain interacting protein kinase 1	382.555	210.018	8.67171	7.63259
ASHG19A3A036913	2.4917	1.31713	2.4917	up	coding	NM_003129	SQLE	RefSeq_coding	2989	chr8	+	126010719	126034523		TTTTCTTTATTTCAAACTTGGTGGCGAATGTGTTGCGGGTCCTGTTGGGCTGCTTTCTGT	6713	Hs.71465	GO:0050660|GO:0016491|GO:0004506|GO:0004506|GO:0006725|GO:0006695|GO:0055114|GO:0010033|GO:0016126|GO:0005783|GO:0005789|GO:0016021|GO:0016020|GO:0005792	NP_003120	Squalene epoxidase	25469.8	11214.3	14.6985	13.3814
ASHG19A3A008322	2.47382	1.30674	2.47382	up	coding	NM_033060	KRTAP4-1	RefSeq_coding	754	chr17	-	39340353	39341147		ATGCAGTTAGACTAAGCCTCTAAGTTTCTGACTGTTATGCTTGATTTGACCTTCAAAATT	85285	Hs.437079	GO:0045095	NP_149049	Keratin associated protein 4-1	646.003	295.187	9.42708	8.12034
ASHG19A3A035104	2.5626	1.35761	2.5626	up	coding	NM_020299	AKR1B10	RefSeq_coding	1610	chr7	+	134212343	134226165		AAGTGTGACTACCTCCACTCATGTCCCATTTTAGCCAAGCTTATTTAAGATCACAGTGAA	57016	Hs.116724	GO:0004033|GO:0016491|GO:0005515|GO:0006081|GO:0007586|GO:0055114|GO:0008202|GO:0005575|GO:0005737	NP_064695	Aldo-keto reductase family 1, member B10 (aldose reductase)	409.975	181.053	8.77318	7.41558
ASHG19A3A029763	2.9436	1.55758	2.9436	up	coding	NM_000544	TAP2	RefSeq_coding	5679	chr6	-	32793187	32806547		ATCTTTATTCTTGCTCAGTATTTTCGCAAACAGCAGCTGTCTAAGTTCACTGTTCTGAAC	6891	Hs.502	GO:0005524|GO:0016887|GO:0042626|GO:0042288|GO:0046978|GO:0046978|GO:0046979|GO:0000166|GO:0015421|GO:0042605|GO:0015433|GO:0015197|GO:0005515|GO:0046980|GO:0005215|GO:0019885|GO:0019885|GO:0002485|GO:0002489|GO:0002489|GO:0002481|GO:0046967|GO:0044419|GO:0019060|GO:0046968|GO:0046968|GO:0015833|GO:0015833|GO:0001916|GO:0002591|GO:0015031|GO:0055085|GO:0042825|GO:0042825|GO:0005783|GO:0005789|GO:…	NP_061313	Transporter 2, ATP-binding cassette, sub-family B (MDR/TAP)	3061.24	1161.86	11.6568	10.0992
ASHG19A3A012558	2.48324	1.31222	2.48324	up	coding	NM_005306	FFAR2	RefSeq_coding	2069	chr19	+	35940616	35942667		CTCCCTCATACAGGGGAAAGCAACCTGGTCTAGCAAATTGAAAATAAAGATGATAAAACT	2867	Hs.248056	GO:0004930|GO:0008289|GO:0004872|GO:0007186|GO:0042995|GO:0005887|GO:0005886|GO:0005886	NP_005297	Free fatty acid receptor 2	822.911	375.87	9.7761	8.46388
ASHG19A3A004363	2.22936	1.15663	2.22936	up	coding	NM_005063	SCD	RefSeq_coding	5473	chr10	+	102106771	102124587		TGCAAGTTCTACACCTGGCTTTGGGGGGTATTCTACTATTTTGTCAGTGCCCTGGGCATA	6319	Hs.558396	GO:0005506|GO:0016491|GO:0016717|GO:0004768|GO:0006633|GO:0055114|GO:0005783|GO:0005789|GO:0016021|GO:0016020	NP_005054	Stearoyl-CoA desaturase (delta-9-desaturase)	200.78	100.272	7.73473	6.5781
ASHG19A3A030753	2.75342	1.46122	2.75342	up	coding	NM_003379	EZR	RefSeq_coding	3172	chr6	-	159186773	159239340		GGCGCGGCAGGAGGACGAGGCAGGGCGGGCGGGCGCTCTAAGGGTTCTGCTCTGACTCCA	7430	Hs.487027	GO:0051015|GO:0050839|GO:0008092|GO:0005515|GO:0051017|GO:0007411|GO:0007016|GO:0030855|GO:0035088|GO:0007159|GO:0022614|GO:0008360|GO:0015629|GO:0005884|GO:0045177|GO:0016324|GO:0016323|GO:0005938|GO:0030863|GO:0005737|GO:0005829|GO:0005829|GO:0005829|GO:0019898|GO:0030175|GO:0005932|GO:0005902|GO:0005902|GO:0031528|GO:0005730|GO:0005886|GO:0001726|GO:0032587|GO:0001931	NP_003370	Ezrin	1261.5	519.878	10.3888	8.92756
ASHG19A3A023539	2.2035	1.1398	2.2035	up	coding	NM_001135095	FNDC3B	RefSeq_coding	6954	chr3	+	171758343	172118490		CGGGCGGGGGAGCGGGGCGCGGCGGGAAGGAGCGGGCGACCCGGTGTGTGGGCCAGCGGA	64778	Hs.159430	GO:0045600|GO:0005783|GO:0016021|GO:0016020	NP_073600	Fibronectin type III domain containing 3B	183.254	92.8333	7.60228	6.46248
ASHG19A3A010736	2.30111	1.20233	2.30111	up	coding	NM_006147	IRF6	RefSeq_coding	2171	chr1	-	209961261	209979479		ATGCTTTGGGGAAGAATGGCCAGATGGGAAACCATTGGAAAGGAAACTCATCTTGGTTCA	3664	Hs.719361	GO:0003677|GO:0005515|GO:0003700|GO:0007050|GO:0048468|GO:0019221|GO:0060333|GO:0030216|GO:0043616|GO:0060644|GO:0008285|GO:0006355|GO:0043588|GO:0006351|GO:0060337|GO:0005737|GO:0005634	NP_006138	Interferon regulatory factor 6	501.536	247.386	9.06796	7.86563
ASHG19A3A003817	2.00145	1.00104	2.00145	up	coding	NM_001178043	DBI	RefSeq_coding	627	chr2	+	120124552	120130120		GCGCGTGCACAGCCAGGCTGCGAAGGCTGAGTTTGAGAAAGCTGCAGAGGAGGTTAGGCA	1622	Hs.78888	GO:0030156|GO:0000062|GO:0008289|GO:0006810	NP_065438	Diazepam binding inhibitor (GABA receptor modulator, acyl-CoA binding protein)	2557.36	1448.15	11.414	10.4129
ASHG19A3A039343	2.1036	1.07286	2.1036	up	coding	NM_021619	PRDM12	RefSeq_coding	2492	chr9	+	133539980	133558384		GAGTTTTCAAGAAACTGCGTTCTACTTCCAGAAGATGGTCACTTTAACCTTGTAAATATT	59335	Hs.495311	GO:0003677|GO:0046872|GO:0008270|GO:0022008|GO:0005622|GO:0005634	NP_067632	PR domain containing 12	1628.08	874.597	10.7553	9.68241
ASHG19A3A032519	35.9754	5.16894	35.9754	up	coding	NM_000474	TWIST1	RefSeq_coding	1669	chr7	-	19155092	19157295		GGACCCATGGTAAAATGCAAATAGATCCGGTGTCTAAATGCATTCATATTTTTATGATTG	7291	Hs.66744	GO:0003677|GO:0070888|GO:0004857|GO:0005515|GO:0046982|GO:0042803|GO:0003700|GO:0008134|GO:0030528|GO:0009653|GO:0006915|GO:0060363|GO:0035115|GO:0035137|GO:0007275|GO:0007517|GO:0045596|GO:0045843|GO:0000122|GO:0001843|GO:0001764|GO:0045944|GO:0001501|GO:0005634	NP_000465	Twist homolog 1 (Drosophila)	2024.92	63.2753	11.0743	5.90538
ASHG19A3A016435	3.35732	1.74731	3.35732	up	coding	NM_003937	KYNU	RefSeq_coding	1688	chr2	+	143635194	143799884		GGTGCCAGCTAACAATAACATTTTCTGTTCCAAACAAAGATGTTTTCCAAGAACTAGAAA	8942	Hs.470126	GO:0016787|GO:0030429|GO:0030429|GO:0030429|GO:0042803|GO:0030170|GO:0009435|GO:0043420|GO:0034641|GO:0019363|GO:0019805|GO:0034341|GO:0034516|GO:0006569|GO:0006569|GO:0005737|GO:0005829|GO:0005829|GO:0005739|GO:0005625	NP_003928	Kynureninase	32174.1	10401.6	15.0222	13.2749
ASHG19A3A046639	4.01021	2.00368	4.01021	up	coding	NM_006328	RBM14	RefSeq_coding	5415	chr11	+	66384052	66397390		GATGGATGAGGTCATCATGAAAACAGATTTACTGGATTTATGGACCTAGTATATACTATG	10432	Hs.714949	GO:0003723|GO:0016455|GO:0030374|GO:0000166|GO:0005515|GO:0030674|GO:0006310|GO:0006281|GO:0006260|GO:0030520|GO:0042921|GO:0016575|GO:0045944|GO:0009725|GO:0016592|GO:0005730|GO:0005634|GO:0030529|GO:0005667	NP_006319	RNA binding motif protein 14	1008.2	282.768	10.063	8.05928
ASHG19A3A043261	4.03316	2.01191	4.03316	up	coding	NM_001129742	CALHM3	RefSeq_coding	1699	chr10	-	105232561	105238997		GTTCTGGGTTCTAGATGTCAATTCTAAATAATAATAATGACCTTAGTCTGCTGCCTCGAT	119395	Hs.364624	GO:0016021|GO:0016020	NP_001123214	Calcium homeostasis modulator 3	441.206	123.5	8.88227	6.87035
ASHG19A3A033170	2.54036	1.34503	2.54036	up	coding	NM_001164738	CALCR	RefSeq_coding	3610	chr7	-	93053798	93189122		ACCACTGCTAAAAGTGAGGAGAGACACAGCTTTCATCATTGGGACTGCAGTTTATTTCAG	799	Hs.489127	GO:0032841|GO:0032841|GO:0004948|GO:0004948|GO:0005515|GO:0007189|GO:0007189|GO:0007202|GO:0007204|GO:0045762|GO:0051384|GO:0005887|GO:0005886|GO:0005886	NP_001733	Calcitonin receptor	129.477	57.3412	7.10074	5.75571
ASHG19A3A025387	3.65338	1.86923	3.65338	up	coding	NM_032456	PCDH7	RefSeq_coding	4921	chr4	+	30722036	30726957		ATGCAGATGTAGTACTAAGTCTGAGATATTGAAATACTGACTACTTTGATGAAACTGCTG	5099	Hs.479439	GO:0005509|GO:0007155|GO:0007156|GO:0005887|GO:0005886	NP_115833	Protocadherin 7	508.133	157.179	9.08487	7.21564
ASHG19A3A021466	3.03401	1.60123	3.03401	up	coding	NM_001099678	LRRC58	RefSeq_coding	7683	chr3	-	120043575	120068186		ATCTTCCTGGAAATCTTCTTAGATACTTGGGTTCAGCCAGCAATTGCCCAAACCCAAAGT	116064	Hs.518084		NP_001093148	Leucine rich repeat containing 58	275.418	101.159	8.19091	6.58968
ASHG19A3A003890	2.04842	1.03451	2.04842	up	coding	NM_001300	KLF6	RefSeq_coding	4679	chr10	-	3818188	3827473		AAAGCACACCAGCGGACGCACACAGGAGAAAAGCCTTACAGATGCTCATGGGAAGGGTGT	1316	Hs.4055	GO:0003677|GO:0003690|GO:0046872|GO:0003700|GO:0016563|GO:0008270|GO:0030183|GO:0045944|GO:0006355|GO:0042060|GO:0005622|GO:0005634	NP_001291	Kruppel-like factor 6	562.47	311.253	9.22992	8.19541
ASHG19A3A008490	3.22748	1.69041	3.22748	up	coding	NM_199262	SP6	RefSeq_coding	3794	chr17	-	45922279	45933240		TTTGAGGGGGTAGGAGGAGGGAGAAACAGCCTGTGTTTTTTATGCAATAAAGTCATCAAC	80320	Hs.253603	GO:0003677|GO:0046872|GO:0008270|GO:0008284|GO:0005622|GO:0005634	NP_954871	Sp6 transcription factor	2772.16	966.108	11.518	9.82756
ASHG19A3A001897	2.07819	1.05533	2.07819	up	coding	NM_001114094	BLNK	RefSeq_coding	1760	chr10	-	97951462	98031333		AGCAGTTCACCTCCACCTGAAAAAGGTCGAAACAGTGGGGCCTGGGAAACCAAGTCACCT	29760	Hs.665244	GO:0005070|GO:0005070|GO:0005068|GO:0030183|GO:0006959|GO:0006954|GO:0035556|GO:0007169|GO:0005737|GO:0005622|GO:0005886	NP_037446	B-cell linker	179.143	96.1934	7.571	6.51567
ASHG19A3A051699	2.65123	1.40666	2.65123	up	coding	NM_001145862	MTMR11	RefSeq_coding	2879	chr1	-	149900543	149908791		GCTCCAACTCTTGTCTTGCTTAGTTTCTACAAATATTTTTGCTTCTTGTCATTTGAAGGA	10903	Hs.425144	GO:0016791	NP_870988	Myotubularin related protein 11	2042.7	873.299	11.0868	9.68018
ASHG19A3A047845	2.29126	1.19614	2.29126	up	coding	NM_004664	LIN7A	RefSeq_coding	1235	chr12	-	81191170	81331694		AAGGAGCAAAATTCCCCCATTTATATCTCTCGCATAATTCCTGGAGGGGTGGCTGAAAGA	8825	Hs.144333	GO:0030165|GO:0005515|GO:0019904|GO:0006887|GO:0007269|GO:0006461|GO:0015031|GO:0048489|GO:0016323|GO:0030054|GO:0005886|GO:0014069|GO:0045211|GO:0045202|GO:0019717|GO:0005923	NP_004655	Lin-7 homolog A (C. elegans)	1322.41	653.89	10.4566	9.26051
ASHG19A3A036835	2.03969	1.02835	2.03969	up	coding	NM_001100117	RIMS2	RefSeq_coding	5592	chr8	+	104512975	105265451		TATTGCCAAACAAAGTTCTGTGCTCGTTGTGGAGGTCGAGTGTCATTACGCTCAAACAAG	9699	Hs.655271	GO:0017137|GO:0046872|GO:0005515|GO:0008270|GO:0006886|GO:0030054|GO:0005886|GO:0042734|GO:0045202	NP_055492	Regulating synaptic membrane exocytosis 2	175.076	95.5792	7.53518	6.50683
ASHG19A3A022204	2.37818	1.24986	2.37818	up	coding	NM_003670	BHLHE40	RefSeq_coding	3061	chr3	+	5021096	5026863		CAAACCTAATTGATCAGCAGCAGCAGAAAATCATTGCCCTGCAGAGTGGTTTACAAGCTG	8553	Hs.728782	GO:0003677|GO:0005515|GO:0003700|GO:0016564|GO:0007623|GO:0009649|GO:0045892|GO:0048168|GO:0006355|GO:0009416|GO:0006351|GO:0005794|GO:0005730|GO:0005634|GO:0005634	NP_003661	Basic helix-loop-helix family, member e40	119.639	56.4736	6.9848	5.73494
ASHG19A3A038904	2.72331	1.44536	2.72331	up	coding	NM_005226	S1PR3	RefSeq_coding	4221	chr9	+	91606361	91619924		GCTGCAGAGAAACTATGCATTAGGTCTCTTTTCAATTAGAAACCTTTACTATTTCCAATG	286223	Hs.585118	GO:0005576	NP_001135885	Chromosome 9 open reading frame 47	13279.7	5400	13.7652	12.3198
ASHG19A3A005546	2.93407	1.5529	2.93407	up	coding	NM_032831	ORAI2	RefSeq_coding	10660	chr7	+	102073995	102097268		GCCGGGCGGGGCGAGGGCAGCTCCGCCTGGCTCCCACCATGAGTGCTGAGCTTAACGTGC	80228	Hs.363308	GO:0005515|GO:0016021|GO:0016020	NP_116220	ORAI calcium release-activated calcium modulator 2	155.813	59.7179	7.36895	5.81605
ASHG19A3A006663	2.59164	1.37387	2.59164	up	coding	NM_182972	IRF2BP2	RefSeq_coding	4677	chr1	-	234740016	234745271		TTTCGAGGCCAACGGGGCCAACGGGTCTAAAGCAGTTGCAAGAACAGCAAGGAAAAGGAA	359948	Hs.350268	GO:0005634	NP_892017	Interferon regulatory factor 2 binding protein 2	327.167	142.5	8.44366	7.06979
ASHG19A3A038113	2.33775	1.22512	2.33775	up	coding	NM_004878	PTGES	RefSeq_coding	1787	chr9	-	132500615	132515344		TAGACCCGTGACCTGAGATGTGTGATTTTTAGTCATTAAATGGAAGTGTCTGCCAGCTGG	9536	Hs.146688	GO:0043295|GO:0016853|GO:0050220|GO:0001516|GO:0006693|GO:0007165|GO:0016021|GO:0016020|GO:0005624	NP_004869	Prostaglandin E synthase	20573.1	9801.21	14.407	13.1818
ASHG19A3A017705	2.29374	1.1977	2.29374	up	coding	NM_003064	SLPI	RefSeq_coding	598	chr20	-	43880878	43883206		TTCAAAGCTGGAGTCTGTCCTCCTAAGAAATCTGCCCAGTGCCTTAGATACAAGAAACCT	6590	Hs.517070	GO:0004866|GO:0004867|GO:0010951|GO:0031012|GO:0005576	NP_003055	Secretory leukocyte peptidase inhibitor	302.636	148.818	8.33334	7.13564
ASHG19A3A034632	3.52245	1.81658	3.52245	up	coding	NM_001001548	CD36	RefSeq_coding	4727	chr7	+	80267831	80308592		TTTGTATCAAATACATAAAAGGAATACTGCTTTTTCCTTTTGTGGCTCAAAGGTAGCTGC	948	Hs.120949	GO:0051636|GO:0051637|GO:0008035|GO:0008289|GO:0071813|GO:0070892|GO:0030169|GO:0005041|GO:0005041|GO:0070053|GO:0050431|GO:0043277|GO:0007596|GO:0019934|GO:0007155|GO:0071221|GO:0071222|GO:0071223|GO:0030301|GO:0050830|GO:0006629|GO:0019915|GO:0042953|GO:0042953|GO:0034383|GO:0044130|GO:0007263|GO:0006910|GO:0034381|GO:0015911|GO:0030168|GO:0002576|GO:0043123|GO:0043410|GO:0001954|GO:0010886|GO:…	NP_001120916	CD36 molecule (thrombospondin receptor)	228.312	72.5302	7.91561	6.09903
ASHG19A3A024202	2.27172	1.18379	2.27172	up	coding	NM_006681	NMU	RefSeq_coding	818	chr4	-	56461404	56502465		CTCTGTTGAAAATCCCTGTGTTGTCAATGTTCTCAGTTGTAACAATGTTGTAAATGTTCA	10874	Hs.418367	GO:0042922|GO:0005102|GO:0007186|GO:0007586|GO:0042755|GO:0001696|GO:0007218|GO:0009648|GO:0046887|GO:0045987|GO:0050806|GO:0006940|GO:0006950|GO:0019233|GO:0007165|GO:0005576|GO:0005576|GO:0043195	NP_006672	Neuromedin U	1527.8	757.068	10.6594	9.47561
ASHG19A3A022278	2.11428	1.08016	2.11428	up	coding	NM_004474	FOXD2	RefSeq_coding	4675	chr1	+	47901688	47906362		GAAAAATCTGTCTGCCGCCTATTTCCCATTGGTGTCGATTGAATAAATGTATGTGAACTT	2306	Hs.166188	GO:0008301|GO:0003690|GO:0010843|GO:0003700|GO:0003705|GO:0003704|GO:0016566|GO:0016563|GO:0008134|GO:0048846|GO:0051216|GO:0060678|GO:0009790|GO:0048484|GO:0050935|GO:0048937|GO:0030318|GO:0010553|GO:0001755|GO:0007389|GO:0007422|GO:0030513|GO:0090184|GO:0045944|GO:0051090|GO:0048485|GO:0006351|GO:0005634|GO:0005667	NP_004465	Forkhead box D2	807.346	432.54	9.74524	8.66508
ASHG19A3A049165	2.67441	1.41922	2.67441	up	coding	NM_006815	TMED2	RefSeq_coding	2126	chr12	+	124069075	124082681		ATGATCAATGAGCTAGCAGTGGCGATGACAGCTGTAAAGCACGAACAGGAATACATGGAA	10959	Hs.75914	GO:0005515|GO:0015031|GO:0016192|GO:0030663|GO:0005793|GO:0005794|GO:0000139|GO:0031410|GO:0030659|GO:0016021|GO:0043231|GO:0016020|GO:0005792|GO:0042589	NP_006806	Transmembrane emp24 domain trafficking protein 2	5340.31	2255.13	12.4642	11.045
ASHG19A3A024429	2.40583	1.26654	2.40583	up	coding	NM_001098540	HPSE	RefSeq_coding	1779	chr4	-	84216469	84256034		AAGGGCGCTGGGGCTCGGCGGGAGGAAGTGCTAGAGCTCTCGACTCTCCGCTGCGCGGCA	10855	Hs.44227	GO:0004566|GO:0043169|GO:0016798|GO:0005975|GO:0006029|GO:0005576|GO:0005765|GO:0016020	NP_006656	Heparanase	152.874	71.1386	7.34006	6.07353
ASHG19A3A001037	3.20849	1.6819	3.20849	up	coding	NM_001017529	PRR5	RefSeq_coding	1560	chr22	+	45064592	45133561		CGGCGGCGGCGGCGCGGGGACCGAGCATCCACAACGGGGTGATCGCCGTCTTCCAGCGCA	55615	Hs.102336	GO:0007049	NP_851850	Proline rich 5 (renal)	180.638	63.0314	7.58061	5.89871
ASHG19A3A021478	2.11728	1.08221	2.11728	up	coding	NM_001017928	CCDC58	RefSeq_coding	718	chr3	-	122078436	122102074		ACAGCTTCCTTTGCAGGGAAAATTGATGCCAGCCAAACCTGTAAACAACTTTATGAGTCT	131076	Hs.220594	GO:0005739	NP_001017928	Coiled-coil domain containing 58	434.419	232.908	8.85975	7.77753
ASHG19A3A031345	2.96103	1.5661	2.96103	up	coding	NM_002800	PSMB9	RefSeq_coding	1048	chr6	+	32821937	32827626	NM_148954,	AATATCAGCTATAAATATCGAGAGGACTTGTCTGCACATCTCATGGTAGCTGGCTGGGAC	5698	Hs.654585	GO:0008233|GO:0004298|GO:0006977|GO:0000082|GO:0000216|GO:0016070|GO:0000084|GO:0031145|GO:0031145|GO:0006915|GO:0000075|GO:0034641|GO:0044419|GO:0016071|GO:0000278|GO:0051436|GO:0051437|GO:0051603|GO:0042981|GO:0006521|GO:0051439|GO:0016032|GO:0005737|GO:0005634|GO:0000502|GO:0005839	NP_002791	Proteasome (prosome, macropain) subunit, beta type, 9 (large multifunctional peptidase 2)	800.083	305.148	9.73272	8.16662
ASHG19A3A026274	10.8241	3.43617	10.8241	up	coding	NM_006745	SC4MOL	RefSeq_coding	2214	chr4	+	166248817	166264224		GGGGATCCCTTATAGTTCATGAAGCCCTTTATTTCTTATTCTGTTTACCTGGATTTTTAT	6307	Hs.105269	GO:0000254|GO:0005506|GO:0016491|GO:0006695|GO:0006633|GO:0006631|GO:0055114|GO:0008202|GO:0005783|GO:0005789|GO:0016021|GO:0005886	NP_006736	Sterol-C4-methyl oxidase-like	1989.45	207.809	11.0516	7.61539
ASHG19A3A004411	4.9701	2.31327	4.9701	up	coding	NM_005532	IFI27	RefSeq_coding	656	chr14	+	94577078	94583033	NM_001130080,	TTCACATTCTCAGGAACTCTCCTTCTTTGGGTCTGGCTGAAGTTGAGGATCTCTTACTCT	3429	Hs.532634	GO:0003674|GO:0006919|GO:0008633|GO:0019221|GO:0008624|GO:0060337|GO:0016021|GO:0016020|GO:0005739	NP_005523	Interferon, alpha-inducible protein 27	975.779	220.542	10.0154	7.70214
ASHG19A3A053793	3.56122	1.83237	3.56122	up	coding	NM_001130100	KIFC3	RefSeq_coding	3411	chr16	-	57792130	57836439		GTGCGGGAGGGGCGCGAGCGGGCTGGCCGAGGAGGAGGCGGCGGCGTGGAGCTGCCTCCT	3801	Hs.23131	GO:0005524|GO:0003777|GO:0000166|GO:0090136|GO:0007018|GO:0007601|GO:0045218|GO:0005912|GO:0030054|GO:0005813|GO:0005737|GO:0031410|GO:0030659|GO:0005856|GO:0005871|GO:0016020|GO:0005874|GO:0005915	NP_005541	Kinesin family member C3	1027.3	324.765	10.0887	8.25628
ASHG19A3A025717	2.07562	1.05354	2.07562	up	coding	NM_005139	ANXA3	RefSeq_coding	1634	chr4	+	79472741	79531602		GATGACATTAGTTCCGAAACATCTGGTGACTTCCGGAAAGCTCTGTTGACTTTGGCAGAT	306	Hs.480042	GO:0005509|GO:0005544|GO:0019834|GO:0042742|GO:0021766|GO:0043312|GO:0031100|GO:0006909|GO:0051054|GO:0045766|GO:0010595|GO:0051091|GO:0051384|GO:0070848|GO:0030424|GO:0005737|GO:0030425|GO:0016020|GO:0043025|GO:0030670|GO:0005886|GO:0042581	NP_005130	Annexin A3	2935.87	1584.7	11.5999	10.5463
ASHG19A3A000928	2.94395	1.55775	2.94395	up	coding	NM_001010938	TNK2	RefSeq_coding	4222	chr3	-	195590235	195622432		GGCTGGGGGCGAGGAGGGACCGCAGAGGCTGGGAGGCGGCAGAATGCAGCCAGAGGAGGG	10188	Hs.518513	GO:0005524|GO:0005095|GO:0046872|GO:0004715|GO:0000166|GO:0005515|GO:0004713|GO:0016740|GO:0016310|GO:0050731|GO:0006468|GO:0016567|GO:0007264|GO:0005912|GO:0030424|GO:0030054|GO:0005737|GO:0030659|GO:0030425|GO:0005768|GO:0030426|GO:0043025|GO:0005634|GO:0005886	NP_005772	Tyrosine kinase, non-receptor, 2	230.031	87.4431	7.92898	6.37123
ASHG19A3A011886	2.07751	1.05485	2.07751	up	coding	NM_176820	NLRP9	RefSeq_coding	3484	chr19	-	56219798	56249768		ATTTTAGACATGGAAAATACCAGCCTTGATGATCCCTCCCTGGCGATTCTTTGCAAAGCG	338321	Hs.661568	GO:0005524|GO:0000166|GO:0005737	NP_789790	NLR family, pyrin domain containing 9	2182.14	1183.49	11.1821	10.1272
ASHG19A3A011948	2.05276	1.03757	2.05276	up	coding	NM_003433	ZNF132	RefSeq_coding	3048	chr19	-	58944181	58951589		CACATTGAAGAGCATGGTAACCTTTGAAGATGTGGCTGTATACTTCTCCCAAGAGGAGTG	7691	Hs.156169	GO:0003677|GO:0046872|GO:0003700|GO:0008270|GO:0006355|GO:0006351|GO:0005622|GO:0005634	NP_003424	Zinc finger protein 132	183.383	99.3902	7.60307	6.56551
ASHG19A3A004465	2.66688	1.41516	2.66688	up	coding	NM_006084	IRF9	RefSeq_coding	1699	chr14	+	24630421	24635772		TGGAGCTCTTCAGAACCGCCTACTTCTGCAGAGACTTGGTCAGGTACTTTCAGGGCCTGG	10379	Hs.1706	GO:0003677|GO:0042802|GO:0005515|GO:0003700|GO:0007166|GO:0019221|GO:0060333|GO:0006355|GO:0009615|GO:0006366|GO:0045351|GO:0060337|GO:0005737|GO:0005829|GO:0005829|GO:0005654|GO:0005654|GO:0005634	NP_006075	Interferon regulatory factor 9	2371.44	1001.45	11.2985	9.88335
ASHG19A3A002829	2.35603	1.23636	2.35603	up	coding	NM_001145448	ZNF200	RefSeq_coding	3303	chr16	-	3272324	3285456		AGCAAACGCTCAGGGGCTGCAGAGGCCCCGAGAGCTTGGCTCTCTGGCAGATTTCCTCTA	7752	Hs.632222	GO:0046872|GO:0003674|GO:0003676|GO:0008270|GO:0008150|GO:0005622|GO:0005634	NP_932354	Zinc finger protein 200	139.726	66.266	7.20845	5.97209
ASHG19A3A005236	4.55327	2.1869	4.55327	up	coding	NM_021940	SMAP1	RefSeq_coding	3263	chr6	+	71377478	71571714		TACGATAAAAATGCCATAGCTATTACAAATaaagaaaaggaaaaaaaaaaggaagagaaa	60682	Hs.485717	GO:0008060|GO:0046872|GO:0008270|GO:0045648|GO:0032312|GO:0005886	NP_068759	Small ArfGAP 1	1288.5	319.035	10.4178	8.23085
ASHG19A3A025388	2.62803	1.39398	2.62803	up	coding	NM_002589	PCDH7	RefSeq_coding	4646	chr4	+	30722036	30732838		GTTTGAGACTTTGTGTGAACAAAGGGAAATTCAGCCTCTTATGTCTTTGTCTTTAATACA	5099	Hs.479439	GO:0005509|GO:0007155|GO:0007156|GO:0005887|GO:0005886	NP_115833	Protocadherin 7	5629.62	2423.94	12.5458	11.1518
ASHG19A3A000598	2.11933	1.0836	2.11933	up	coding	NM_000611	CD59	RefSeq_coding	7635	chr11	-	33724557	33758025		TGGAAGAGGATCTTGGGCGCCGCCAGGTTCTGTGGACAATCACAATGGGAATCCAAGGAG	966	Hs.278573	GO:0005515|GO:0007596|GO:0007166|GO:0031362|GO:0031225|GO:0005576|GO:0005624|GO:0005886	NP_976076	CD59 molecule, complement regulatory protein	1611.49	859.346	10.7409	9.65725
ASHG19A3A029705	2.37925	1.2505	2.37925	up	coding	NM_021160	BAT5	RefSeq_coding	2019	chr6	-	31654727	31671137		TATTCTGGTCCATCTCTTATTACTCCTCTCCCTTCGCCTTCTTCTACTTGTACAGGAAAG	7920	Hs.388188	GO:0016787|GO:0005515|GO:0016021|GO:0016020	NP_066983	Abhydrolase domain containing 16A	3292.9	1548.5	11.7598	10.5093
ASHG19A3A029176	3.16119	1.66047	3.16119	up	coding	NM_002449	MSX2	RefSeq_coding	2224	chr5	+	174151574	174157901		CCTCCGGTATACCTTTATCCCTTTGAAAGGGTGCTTGTACAATTTGATATATTTTATTGA	4488	Hs.89404	GO:0003677|GO:0010843|GO:0005515|GO:0043565|GO:0003700|GO:0016564|GO:0030509|GO:0071392|GO:0071363|GO:0071445|GO:0030326|GO:0003007|GO:0007275|GO:0043066|GO:0008285|GO:0001649|GO:0043065|GO:0006355|GO:0001501|GO:0005737|GO:0005634	NP_002440	Msh homeobox 2	15326.5	5392.83	13.9777	12.3172
ASHG19A3A005238	2.09515	1.06705	2.09515	up	coding	NM_021952	ELAVL4	RefSeq_coding	2101	chr1	+	50574593	50667540		TTAATATGGCCTATGGCGTAAAGAGACTGATGTCTGGACCAGTCCCCCCTTCTGCTTGTC	1996	Hs.213050	GO:0017091|GO:0003723|GO:0003730|GO:0000166|GO:0006396|GO:0006397	NP_068771	ELAV (embryonic lethal, abnormal vision, Drosophila)-like 4 (Hu antigen D)	1901.55	1026.52	10.9871	9.92006
ASHG19A3A051622	2.78993	1.48023	2.78993	up	coding	NM_005252	FOS	RefSeq_coding	2158	chr14	+	75745480	75748935		GCATTGTTTGCTTATTGTTCCAAGACATTGTCAATAAAAGCATTTAAGTTGAATGCGACC	2353	Hs.728789	GO:0070412|GO:0003690|GO:0010843|GO:0005515|GO:0046983|GO:0003700|GO:0003704|GO:0006306|GO:0002755|GO:0002755|GO:0002756|GO:0002756|GO:0060395|GO:0008063|GO:0007568|GO:0031668|GO:0032870|GO:0034614|GO:0001661|GO:0007565|GO:0006954|GO:0045087|GO:0007399|GO:0045944|GO:0051090|GO:0006357|GO:0051591|GO:0009409|GO:0051412|GO:0034097|GO:0042493|GO:0009629|GO:0009416|GO:0032496|GO:0009612|GO:0014070|GO:…	NP_005243	FBJ murine osteosarcoma viral oncogene homolog	19902.5	7930.79	14.3602	12.88
ASHG19A3A012613	3.60015	1.84806	3.60015	up	coding	NM_144689	ZNF420	RefSeq_coding	2990	chr19	+	37569381	37620649		TAAGATAGGAACCCAGAAGAGGACTGATCATTTCTTGCAGCTCTAAAAACCATGGCTCGG	147923	Hs.444992	GO:0003677|GO:0046872|GO:0008270|GO:0006355|GO:0005622|GO:0005634	NP_653290	Zinc finger protein 420	347.297	107.988	8.5308	6.68275
ASHG19A3A046489	2.0891	1.06288	2.0891	up	coding	NM_001127392	C11orf9	RefSeq_coding	5926	chr11	+	61520120	61555989		CGGGCAGGCGGGACATGGAGGTGGTGGACGAGACGGAGGCGCTGCAGCGCTTCTTCGAAG	745	Hs.473109	GO:0003677|GO:0003700|GO:0030154|GO:0022010|GO:0014003|GO:0031643|GO:0045893|GO:0016021|GO:0016020|GO:0005634	NP_037411	Chromosome 11 open reading frame 9	109.921	58.8433	6.85805	5.79517
ASHG19A3A005867	2.00475	1.00343	2.00475	up	coding	NM_205846	PRELID2	RefSeq_coding	2104	chr5	-	145138581	145214867	NM_138492,	CGTGGTTCCAGAAATTTTAAGGAAGGTGAGCATTTTGAAAGTACCTAATATCCAATTAGA	153768	Hs.314261		NP_995318	PRELI domain containing 2	362.223	204.588	8.59675	7.59332
ASHG19A3A029681	4.42083	2.14432	4.42083	up	coding	NM_001264	CDSN	RefSeq_coding	2549	chr6	-	31082869	31088223		TCTCTTCTACCTTCCAGCTGCTCCCACAGAGGAGGAAGACAATAAATATTTGTTGAACTG	1041	Hs.556031	GO:0042803|GO:0007155|GO:0016337|GO:0008544|GO:0030216|GO:0005911|GO:0001533|GO:0030057|GO:0030057|GO:0005576	NP_001255	Corneodesmosin	3635.17	923.581	11.9053	9.76097
ASHG19A3A035387	2.65082	1.40644	2.65082	up	coding	NM_005542	INSIG1	RefSeq_coding	3020	chr7	+	155089485	155101942		TTTAAGAGAGAATGGGCCAGTGTCATGCGCTGCATAGCAGTTTTTGTTGGCATTAACCAC	3638	Hs.520819	GO:0005515|GO:0030967|GO:0008283|GO:0006695|GO:0060363|GO:0042472|GO:0008152|GO:0042474|GO:0045599|GO:0045717|GO:0010894|GO:0060021|GO:0006991|GO:0008202|GO:0006641|GO:0005783|GO:0005789|GO:0016021|GO:0016020	NP_938151	Insulin induced gene 1	2768.24	1170.6	11.5164	10.11
ASHG19A3A049790	2.21411	1.14673	2.21411	up	coding	NM_033132	ZIC5	RefSeq_coding	4607	chr13	-	100615274	100624178		GTATTTTACCATGCATAGGTTAACTCTTTGCCACAGATTTATTGGTTCTTGATACACCTA	85416	Hs.508570	GO:0003677|GO:0046872|GO:0008270|GO:0030154|GO:0007275|GO:0007399|GO:0005622|GO:0005634	NP_149123	Zic family member 5 (odd-paired homolog, Drosophila)	1934.22	987.739	11.0111	9.86441
ASHG19A3A016764	2.57304	1.36347	2.57304	up	coding	NM_025147	COQ10B	RefSeq_coding	1989	chr2	+	198318230	198339851		ATTTGGCGTTTTAGCCCAGGTCTTCCTGGCTACCCAAGAACTTGTACCTTGGATTTTTCA	80219	Hs.723979	GO:0016020|GO:0005743|GO:0005739	NP_079423	Coenzyme Q10 homolog B (S. cerevisiae)	513.635	226.27	9.10034	7.73686
ASHG19A3A053489	2.23775	1.16205	2.23775	up	coding	NM_001136472	LITAF	RefSeq_coding	2479	chr16	-	11641581	11680806	NM_001136473,	TCTCGGGGCGCCCGAGAGGCCAGCTCAGACCTCCCGGCTCGACAGGCGGCGCGGGCGGCG	9516	Hs.459940	GO:0003702|GO:0050699|GO:0004871|GO:0006915|GO:0043123|GO:0006357|GO:0007165|GO:0005794|GO:0005765|GO:0016020	NP_004853	Lipopolysaccharide-induced TNF factor	144.769	72.4387	7.25956	6.09751
ASHG19A3A042348	2.76357	1.46653	2.76357	up	coding	NM_004508	IDI1	RefSeq_coding	2150	chr10	-	1085965	1095061		TCAACCCCCAACTGAGGACCACTGTCCTACAGAGTCAGGAAATATTGTAGGGAGAAAAAA	3422	Hs.644603	GO:0016787|GO:0016853|GO:0004452|GO:0046872|GO:0016117|GO:0006695|GO:0008299|GO:0005829|GO:0005739|GO:0005777	NP_004499	Isopentenyl-diphosphate delta isomerase 1	54522.7	21193.9	15.754	14.2875
ASHG19A3A050034	2.12877	1.09002	2.12877	up	coding	NM_000059	BRCA2	RefSeq_coding	11386	chr13	+	32889616	32973809		AGACAGCAAGTTCGTGCTTTGCAAGATGGTGCAGAGCTTTATGAAGCAGTGAAGAATGCA	675	Hs.34012	GO:0003677|GO:0010484|GO:0010485|GO:0043015|GO:0004402|GO:0002020|GO:0005515|GO:0003697|GO:0016563|GO:0042771|GO:0006978|GO:0006310|GO:0006281|GO:0007420|GO:0007569|GO:0007049|GO:0033205|GO:0051298|GO:0043009|GO:0051276|GO:0006302|GO:0006302|GO:0000724|GO:0000724|GO:0008585|GO:0030097|GO:0043966|GO:0043967|GO:0031619|GO:0001833|GO:0007141|GO:0030879|GO:0035264|GO:0033600|GO:0006289|GO:0001556|GO:…	NP_000050	Breast cancer 2, early onset	199.393	104.487	7.72348	6.63347
ASHG19A3A001867	2.12182	1.0853	2.12182	up	coding	NM_001110303	USP20	RefSeq_coding	4334	chr9	+	132597695	132644107	NM_006676,	GGCGGCGGCGCAGTTGCGAGTGCAGGCTCCTTGCCAGAGGCCTCCACTCACTCCAGACCC	10868	Hs.5452	GO:0001664|GO:0004197|GO:0046872|GO:0008233|GO:0004221|GO:0008270|GO:0006897|GO:0071108|GO:0070536|GO:0016579|GO:0008277|GO:0006511|GO:0005575|GO:0005737|GO:0048471	NP_006667	Ubiquitin specific peptidase 20	154.48	81.4614	7.35505	6.26975
ASHG19A3A010077	2.5672	1.36019	2.5672	up	coding	NM_004207	SLC16A3	RefSeq_coding	2035	chr17	+	80186888	80197368		AGGCGGGCAGAGGCGGCGAGAGGCGGCGAGAGGCGGGCTGAGGCGGCCCAGCGGCGGCAG	9123	Hs.500761	GO:0008028|GO:0015355|GO:0015293|GO:0007596|GO:0050900|GO:0015718|GO:0015711|GO:0006090|GO:0055085|GO:0015629|GO:0005887|GO:0005624|GO:0031965|GO:0005886|GO:0005886|GO:0005886	NP_004198	Solute carrier family 16, member 3 (monocarboxylic acid transporter 4)	1066.22	469.616	10.1413	8.78108
ASHG19A3A052793	2.40017	1.26314	2.40017	up	coding	NM_024111	CHAC1	RefSeq_coding	1578	chr15	+	41245635	41248717		TCACCTTCTATCCCCAAGATGCTCCTGACCAACCACTGAAGGCATTGGCCTATGTGGCCA	79094	Hs.155569	GO:0005515|GO:0070059|GO:0006986|GO:0005737|GO:0005829	NP_077016	ChaC, cation transport regulator homolog 1 (E. coli)	178.782	83.5075	7.5679	6.30476
ASHG19A3A052314	3.20302	1.67943	3.20302	up	coding	NM_002963	S100A7	RefSeq_coding	450	chr1	-	153430219	153433137	NM_176823,	TCACAAATACACCAGACGTGATGACAAGATTGAGAAGCCAAGCCTGCTGACGATGATGAA	6278	Hs.112408	GO:0050786|GO:0005509|GO:0005515|GO:0008270|GO:0008270|GO:0001525|GO:0050829|GO:0008544|GO:0045087|GO:0030216|GO:0070374|GO:0010820|GO:0071624|GO:0090026|GO:0032496|GO:0000302|GO:0051238|GO:0005737|GO:0005737|GO:0005829|GO:0005783|GO:0005576|GO:0005576|GO:0005925|GO:0005634	NP_002954	S100 calcium binding protein A7	2674.76	943.047	11.4724	9.79294
ASHG19A3A006235	2.0594	1.04223	2.0594	up	coding	NM_153500	CAMKK2	RefSeq_coding	5448	chr12	-	121675495	121736111	NM_172226,	TGTCAGCGCCTGGAAACTTGCTCACGAAGCAAGGCAGCGAAGACAACCTCCAGGGCACCG	10645	Hs.297343	GO:0005524|GO:0005509|GO:0005516|GO:0004683|GO:0000166|GO:0004713|GO:0016740|GO:0000165|GO:0019722|GO:0046777|GO:0006468|GO:0045859|GO:0005737|GO:0005622	NP_757380	Calcium/calmodulin-dependent protein kinase kinase 2, beta	340.654	186.309	8.50067	7.45844
ASHG19A3A006780	2.58993	1.37291	2.58993	up	coding	NM_198337	INSIG1	RefSeq_coding	2728	chr7	+	155089485	155101942		CCTCCCTGCTGCGGGACAGCAGCTGGTATACATCCCCAGATTTCCTCTATATTCGTTCTT	3638	Hs.520819	GO:0005515|GO:0030967|GO:0008283|GO:0006695|GO:0060363|GO:0042472|GO:0008152|GO:0042474|GO:0045599|GO:0045717|GO:0010894|GO:0060021|GO:0006991|GO:0008202|GO:0006641|GO:0005783|GO:0005789|GO:0016021|GO:0016020	NP_938151	Insulin induced gene 1	3199.46	1381.86	11.7167	10.3438
ASHG19A3A010684	6.35612	2.66815	6.35612	up	coding	NM_001144966	NEDD4L	RefSeq_coding	8300	chr18	+	55888766	56068772		CGCTAGTCCAGCTGAACACTTTCCAGCCTTGTTTTTCAGCAGCTTTGAGGAAAAGTATAG	23327	Hs.185677	GO:0016881|GO:0016874|GO:0005515|GO:0019871|GO:0017080|GO:0004842|GO:0004842|GO:0006883|GO:0007588|GO:0044419|GO:0010766|GO:0045807|GO:0006464|GO:0016567|GO:0042787|GO:0042176|GO:0010038|GO:0006814|GO:0030104|GO:0005737|GO:0005622	NP_056092	Neural precursor cell expressed, developmentally down-regulated 4-like	470.688	83.4301	8.9717	6.30355
ASHG19A3A031498	2.0733	1.05193	2.0733	up	coding	NM_002965	S100A9	RefSeq_coding	586	chr1	+	153330329	153333502		ACCCTGAACCAGGGGGAATTCAAAGAGCTGGTGCGAAAAGATCTGCAAAATTTTCTCAAG	6280	Hs.112405	GO:0005509|GO:0005515|GO:0004871|GO:0007267|GO:0006935|GO:0006954|GO:0007165|GO:0005737|GO:0005856|GO:0005576|GO:0005730|GO:0005634|GO:0005886	NP_002956	S100 calcium binding protein A9	10480.8	5635.44	13.4291	12.3772
ASHG19A3A010850	2.55119	1.35117	2.55119	up	coding	NM_198532	C19orf35	RefSeq_coding	2570	chr19	-	2274630	2282181		TGGGACCTTAGACACCCAGCTCATCTCAGCGGGGTCTGGACTCACCTTCCCTAAAACAGT	374872	Hs.511803		NP_940934	Chromosome 19 open reading frame 35	212.391	93.0117	7.81652	6.46535
ASHG19A3A045607	2.22998	1.15703	2.22998	up	coding	NM_144665	SESN3	RefSeq_coding	1987	chr11	-	94906132	94964246		ATATTGAAGACCCTGGTTTTGGGTATGAAGACTTTGCCAGACGAGGAGAAGAGCATTTGC	143686	Hs.659934	GO:0007050|GO:0005634	NP_653266	Sestrin 3	205.8	103.022	7.77092	6.61389
ASHG19A3A025961	3.30652	1.72531	3.30652	up	coding	NM_001128933	SYNPO2	RefSeq_coding	9950	chr4	+	119809995	119959668		GTTCCAAATGTAAAGCTCCTTGTGTTTACCTCTGTTTATGTCATTCTTGACATGTTTATC	171024	Hs.655519	GO:0071889|GO:0003779|GO:0051371|GO:0030018|GO:0005737|GO:0005634	NP_597734	Synaptopodin 2	1718.97	590.916	10.8366	9.11127
ASHG19A3A045926	2.52435	1.33591	2.52435	up	coding	NM_001143993	RASSF7	RefSeq_coding	1746	chr11	+	560970	564024		CGCTGGGGGCGGCAGGTTGCGGCGGCGCCGGAGCGGGTCTCCAGGCTGGCGAGCGCCCAG	8045	Hs.72925	GO:0003677|GO:0005515|GO:0006355|GO:0007165|GO:0005634	NP_003466	Ras association (RalGDS/AF-6) domain family (N-terminal) member 7	232.005	102.402	7.94229	6.60638
ASHG19A3A040368	3.49912	1.80699	3.49912	up	coding	NM_001013628	DCAF12L2	RefSeq_coding	2612	chrX	-	125297483	125300080		GCTCAGAGTAGGTGTTGATTTTTTATTACTGTATACATGGATAATTCTGGATCCAGTATG	340578	Hs.181867		NP_001013650	DDB1 and CUL4 associated factor 12-like 2	358.027	115.144	8.57741	6.77041
ASHG19A3A047339	2.0509	1.03626	2.0509	up	coding	NM_005039	PRB1	RefSeq_coding	1173	chr12	-	11504756	11508524	NM_006248,	AAGGAGACAAGTCCCGAAGTTCCCAATCTCCTCCAGGAAAGCCACAAGGACCACCCCCAC	5542	Hs.631726	GO:0003674|GO:0008150|GO:0005576	NP_955386	Proline-rich protein BstNI subfamily 1	594.369	327.816	9.30745	8.27119

## Sheet: mRNAs_down
# Fold Change cut-off: 2.0 # Condition pairs: pcDNA3.1-PinX1 vs Empty Vector # Column A: ProbeName, it represents probe name. # Column B: Fold change, positive value indicates up-regulation and negative value indicates down-regulation. # Column C: Log Fold change, log2 value of absolute fold change. Positive value indicates up-regulation and negative value indicates down-regulation. # Column D: A…
pcDNA3.1-PinX1 vs Empty Vector 2.0 fold down regulated mRNAs
	Fold Change and Regulation				Annotations																Raw Intensities		Normalized Intensities
ProbeName	Fold change([pcDNA3.1-PinX1] vs [Empty Vector])	Log Fold change([pcDNA3.1-PinX1] vs [Empty Vector])	Absolute Fold change([pcDNA3.1-PinX1] vs [Empty Vector])	Regulation([pcDNA3.1-PinX1] vs [Empty Vector])	type	seqname	GeneSymbol	source	RNAlength	chrom	strand	txStart	txEnd	Xhyb	probeSeq	EntrezID	unigene	GO	ProteinAccession	product	[pcDNA3.1-PinX1](raw)	[Empty Vector](raw)	[pcDNA3.1-PinX1](normalized)	[Empty Vector](normalized)
ASHG19A3A047831	-2.22021	-1.15069	2.22021	down	coding	NM_001321	CSRP2	RefSeq_coding	901	chr12	-	77252495	77272799		AAGTGTTCCAGATGTGGGGATTCTGTATATGCTGCCGAGAAGATAATTGGAGCTGGAAAG	1466	Hs.530904	GO:0046872|GO:0003674|GO:0008270|GO:0030154|GO:0007275|GO:0045445|GO:0005634	NP_001312	Cysteine and glycine-rich protein 2	494.344	1247.61	9.04787	10.1986
ASHG19A3A019281	-2.49977	-1.3218	2.49977	down	coding	NM_178865	SERINC2	RefSeq_coding	2011	chr1	+	31885962	31907524		GACTTCGTGCCTTACTGAGTCTCTAAGACTTTTTCTAATAAACAAGCCAGTGCGTGTACC	347735	Hs.270655	GO:0016021|GO:0016020	NP_849196	Serine incorporator 2	2616.56	7355.92	11.444	12.7658
ASHG19A3A004858	-2.88191	-1.52703	2.88191	down	coding	NM_015938	NMD3	RefSeq_coding	2758	chr3	+	160939098	160969795		TCCAGGGCTGGTCTGGAGGCGCGAAAACTTAAGGCATACAGAACGATGGAGTATATGGCA	51068	Hs.598836	GO:0015031|GO:0005737|GO:0005730|GO:0005654|GO:0005634	NP_057022	NMD3 homolog (S. cerevisiae)	292.94	954.25	8.28162	9.80864
ASHG19A3A050410	-2.55138	-1.35128	2.55138	down	coding	NM_001001715	FARP1	RefSeq_coding	1321	chr13	+	98795433	98897556		CCTGAAAGGGTTTAGTTTTTAAAAGGAGTACCTCATTTACCATATTACTGTGTTCTGAGA	10160	Hs.403917	GO:0005089|GO:0005488|GO:0008092|GO:0005085|GO:0035023|GO:0005737|GO:0005856|GO:0019898|GO:0005622	NP_005757	FERM, RhoGEF (ARHGEF) and pleckstrin domain protein 1 (chondrocyte-derived)	94.3365	267.948	6.63347	7.98474
ASHG19A3A028924	-2.79622	-1.48348	2.79622	down	coding	NM_018939	PCDHB6	RefSeq_coding	3030	chr5	+	140529838	140532866		TTACTGAAGTGTCAACACATTAGTTTGTGAGCCTCATGTAAGAACATGATGGTCTTTTTT	56130	Hs.283085	GO:0005509|GO:0016339|GO:0007155|GO:0007156|GO:0007399|GO:0007416|GO:0007268|GO:0016021|GO:0005887|GO:0005886	NP_061762	Protocadherin beta 6	411.813	1308.05	8.77988	10.2634
ASHG19A3A022954	-2.31634	-1.21185	2.31634	down	coding	NM_001627	ALCAM	RefSeq_coding	4760	chr3	+	105085712	105295743		GGTTTTCCAAAGCCAGCCATTCAATGGACAATTACTGGCAGTGGAAGCGTCATAAACCAA	214	Hs.591293	GO:0005102|GO:0007411|GO:0007155|GO:0008045|GO:0007165|GO:0030424|GO:0009897|GO:0016021|GO:0016020|GO:0043025	NP_001618	Activated leukocyte cell adhesion molecule	199.927	524.379	7.72872	8.94057
ASHG19A3A029012	-5.00401	-2.32309	5.00401	down	coding	NM_032566	SPINK7	RefSeq_coding	566	chr5	+	147691989	147695479		AATCTTGACTGAATGGAGAAAGTTTCTGTGCTACCCCTACAAACCCATGCCTCACTGACA	84651	Hs.244569	GO:0030414|GO:0005515|GO:0004867|GO:0005576	NP_115955	Serine peptidase inhibitor, Kazal type 7 (putative)	489.385	2784.16	9.03274	11.3558
ASHG19A3A047702	-3.05431	-1.61085	3.05431	down	coding	NM_003920	TIMELESS	RefSeq_coding	5154	chr12	-	56810156	56843200		TTTTTGCACTGGCTGCAGTCAACCAAAAAGCCTTTGTGGAGCTGTTGTTCTGGAAGAACA	8914	Hs.118631	GO:0005515|GO:0046982|GO:0042803|GO:0048754|GO:0007049|GO:0051301|GO:0007623|GO:0009582|GO:0009790|GO:0030324|GO:0007067|GO:0002009|GO:0010553|GO:0033261|GO:0042127|GO:0006974|GO:0009628|GO:0000790|GO:0005634	NP_003911	Timeless homolog (Drosophila)	70.8562	242.432	6.22569	7.83653
ASHG19A3A002376	-2.29428	-1.19804	2.29428	down	coding	NM_001135954	UCK1	RefSeq_coding	2096	chr9	-	134399183	134406662		TCCGACGTCAGGCTGTCTCGAAGAGACAAAGAAGTATGCCGATGTGATCATCCCGCGAGG	83549	Hs.9597	GO:0005524|GO:0016301|GO:0019206|GO:0000166|GO:0016773|GO:0016740|GO:0004849|GO:0008152|GO:0055086|GO:0006206|GO:0043097|GO:0005829	NP_113620	Uridine-cytidine kinase 1	84.0581	215.073	6.46801	7.66605
ASHG19A3A001608	-2.88722	-1.52968	2.88722	down	coding	NM_001083585	RABEP1	RefSeq_coding	5322	chr17	+	5185557	5289131		AGAAAGAATAAAAGTGGAAAAAGGACAGGCTACCGTTGAACAACTAATGTTTGAAGAGAA	9135	Hs.592121	GO:0005096|GO:0008083|GO:0005515|GO:0042803|GO:0006915|GO:0006944|GO:0006897|GO:0015031|GO:0005813|GO:0005737|GO:0016023|GO:0005769|GO:0055037	NP_004694	Rabaptin, RAB GTPase binding effector protein 1	74.1845	240.032	6.29145	7.82114
ASHG19A3A002162	-2.78227	-1.47626	2.78227	down	coding	NM_001130147	CCDC77	RefSeq_coding	2359	chr12	+	498515	551804		AACGACTCCACGCAGCTCGCCCTTGGTTATTTGGACAAGAGGCACATTGACCCAATTTGG	84318	Hs.631656		NP_115734	Coiled-coil domain containing 77	103.973	324.052	6.77693	8.2532
ASHG19A3A034805	-2.02853	-1.02043	2.02853	down	coding	NM_019606	MEPCE	RefSeq_coding	2769	chr7	+	100027528	100031740		TTCCAGTATGGGAATTATTGCAAATACTATGGGTACCGCAATCCTTCCTGTGAGGATGGG	56257	Hs.178011	GO:0008168|GO:0016740	NP_062552	Methylphosphate capping enzyme	160.488	367.771	7.41205	8.43249
ASHG19A3A047575	-2.07741	-1.05479	2.07741	down	coding	NM_147190	LASS5	RefSeq_coding	1986	chr12	-	50523581	50561097		ATAAGAAAAGGCTGGAGGGCCTGTCAAAGCAGCTGGATTGGAATGTCCGAAAAATCCAAT	91012	Hs.270525	GO:0043565|GO:0003700|GO:0050291|GO:0050291|GO:0046513|GO:0008610|GO:0006355|GO:0030148|GO:0006665|GO:0005783|GO:0005789|GO:0016021|GO:0016020|GO:0005792|GO:0031965|GO:0005634	NP_671723	LAG1 homolog, ceramide synthase 5	137.145	320.082	7.18077	8.23556
ASHG19A3A022302	-2.1876	-1.12935	2.1876	down	coding	NM_001134368	SLC6A6	RefSeq_coding	1286	chr3	+	14444105	14489691		TAAAAATGATACAGTTTTCTTAATGTATTTTAGGAAAAAATATATTCTGTTATTGCACAG	6533	Hs.529488	GO:0015171|GO:0005328|GO:0015293|GO:0030977|GO:0005369|GO:0003333|GO:0006865|GO:0006520|GO:0034641|GO:0006811|GO:0006836|GO:0055085|GO:0006810|GO:0016021|GO:0005887|GO:0005886	NP_003034	Solute carrier family 6 (neurotransmitter transporter, taurine), member 6	66.4194	162.465	6.13263	7.26198
ASHG19A3A038304	-2.98641	-1.57841	2.98641	down	coding	NM_014827	ZC3H11A	RefSeq_coding	4795	chr1	+	203764750	203823255	ENST00000431766,ENST00000414090,	TCCAAGTCTCTTAAGGAGCGATTAGGCATGTCAGCTGATCCAGATAATGAGGATGCAACA	9877	Hs.532399	GO:0046872|GO:0003676|GO:0005515|GO:0008270	NP_055642	Zinc finger CCCH-type containing 11A	131.215	442.694	7.11891	8.69733
ASHG19A3A002251	-2.4067	-1.26705	2.4067	down	coding	NM_001134406	RUNDC3B	RefSeq_coding	3903	chr7	+	87257728	87461612		TAATTGTGGAGCTTCAAGATCAGCTGAAAAGTTATCAAAGTCTTGACCAGTTATCAGCAG	154661	Hs.411488		NP_612147	RUN domain containing 3B	75.5477	203.534	6.31805	7.5851
ASHG19A3A006122	-2.8747	-1.52341	2.8747	down	coding	NM_152298	NASP	RefSeq_coding	2306	chr1	+	46049716	46084567		GTAGAAAATAATGATAACATAGATGAAACTGAAGGCTCAGAAGAGGATGATAAAGAAAAT	4678	Hs.319334	GO:0051879|GO:0005515|GO:0006260|GO:0001824|GO:0007049|GO:0008283|GO:0043486|GO:0015031|GO:0005737|GO:0005634	NP_689511	Nuclear autoantigenic sperm protein (histone-binding)	329.225	1067.16	8.45288	9.97629
ASHG19A3A049046	-2.81285	-1.49204	2.81285	down	coding	NM_005475	SH2B3	RefSeq_coding	5425	chr12	+	111843751	111889426		CACATTGTGATAACATAAAGTGGATTCATCTTGTATCATTATAGGCAGAAGGTATTTGGC	10019	Hs.506784	GO:0004871|GO:0007596|GO:0030154|GO:0035162|GO:0035556|GO:0005829	NP_005466	SH2B adaptor protein 3	1063.63	3350.29	10.139	11.631
ASHG19A3A021655	-2.21699	-1.1486	2.21699	down	coding	NM_006219	PIK3CB	RefSeq_coding	3213	chr3	-	138374232	138478185		AAGTTGTGAGCACCTCTGAAACAATTGCTGACATTCAGCTGAACAGTAGCAATGTGGCTG	5291	Hs.239818	GO:0016303|GO:0005524|GO:0004428|GO:0043560|GO:0000166|GO:0046934|GO:0016773|GO:0007186|GO:0050852|GO:0000187|GO:0007596|GO:0006874|GO:0006935|GO:0040016|GO:0008543|GO:0007156|GO:0008286|GO:0050900|GO:0048011|GO:0046854|GO:0048015|GO:0030168|GO:0001952|GO:0007165|GO:0005829|GO:0005829|GO:0005942	NP_006210	Phosphoinositide-3-kinase, catalytic, beta polypeptide	281.228	703.958	8.22229	9.37089
ASHG19A3A019040	-2.89839	-1.53525	2.89839	down	coding	NM_174981	POTED	RefSeq_coding	1826	chr21	+	14982497	15013906	NR_027480,NM_207355,NM_001145442,NM_001137671,NM_001136213,NM_001099771,NM_001083538,NM_001005356,	TTCTCAAGATCTATCTGGACAGACGGCCAGAGAGTATGCTGTTTCTAGTCATCATCATGT	339010	Hs.442712		NP_997238	POTE ankyrin domain family, member B	373.377	1224.34	8.63734	10.1726
ASHG19A3A043544	-5.05005	-2.3363	5.05005	down	coding	NM_003739	AKR1C3	RefSeq_coding	1224	chr10	+	5136567	5149876	DQ269985,	TCACCAACAGATGAAAATGGAAAAGTAATATTTGACATAGTGGATCTCTGTACCACCTGG	8644	Hs.78183	GO:0004033|GO:0047026|GO:0047718|GO:0016491|GO:0047017|GO:0047045|GO:0050327|GO:0047115|GO:0055114|GO:0006693|GO:0005737|GO:0005622	NP_003730	Aldo-keto reductase family 1, member C3 (3-alpha hydroxysteroid dehydrogenase, type II)	416.802	2389.95	8.7974	11.1337
ASHG19A3A021131	-2.04318	-1.03082	2.04318	down	coding	NM_015426	POC1A	RefSeq_coding	2213	chr3	-	52109249	52188706	NM_001161581,	CCCCAGACACTGACTAGCACGCTGGAGCACATTGTGGGCCAGCTGGATGTCCTCACTCAG	25886	Hs.476306	GO:0042995|GO:0005814|GO:0005737|GO:0005856|GO:0005932	NP_056241	POC1 centriolar protein homolog A (Chlamydomonas)	114.513	261.731	6.91849	7.94931
ASHG19A3A046720	-2.58475	-1.37003	2.58475	down	coding	NM_016729	FOLR1	RefSeq_coding	982	chr11	+	71903172	71907366	NM_016725,NM_016724,NM_000802,	GCCTCTGACAGCCACTTTGAATAAACCAGACACCGCACATGTGTCTTGAGAATTATTTGG	2348	Hs.73769	GO:0005542|GO:0004872|GO:0008219|GO:0015884|GO:0006898|GO:0031225|GO:0005576|GO:0005887|GO:0005624|GO:0005886	NP_057941	Folate receptor 1 (adult)	90.664	260.59	6.57147	7.94149
ASHG19A3A046893	-4.40841	-2.14026	4.40841	down	coding	NM_020802	KIAA1377	RefSeq_coding	7043	chr11	+	101785745	101871791		AATCAGTTCCCTTATGGAAAAGAGGTCCTAATGTCCTGCATCAAAATAAGAGGGCTACAG	57562	Hs.156352	GO:0005515	NP_065853	KIAA1377	106.676	530.404	6.81529	8.95555
ASHG19A3A001864	-2.10493	-1.07377	2.10493	down	coding	NM_001110215	CENPM	RefSeq_coding	558	chr22	-	42334748	42336223		GTGGGACTTGCCTGGTGTGCTCAAGGTGGAAGGCTTTAGGGCCACCATGGCGCAGCGCCT	79019	Hs.208912	GO:0000087|GO:0000278|GO:0000236|GO:0000777|GO:0005737|GO:0005829|GO:0005634	NP_076958	Centromere protein M	170.204	404.496	7.49484	8.56861
ASHG19A3A036523	-2.1392	-1.09707	2.1392	down	coding	NM_001160008	NRG1	RefSeq_coding	2377	chr8	+	32405727	32618507		GCTTGCCCTCCACCCTATAGTATCTATTTTATGAAATTCCAAGAAGGGATGAATAAATAA	3084	Hs.453951	GO:0043125|GO:0043125|GO:0005125|GO:0008083|GO:0008083|GO:0005515|GO:0030296|GO:0005102|GO:0030971|GO:0003712|GO:0030297|GO:0030297|GO:0007219|GO:0007171|GO:0006916|GO:0055007|GO:0007154|GO:0008283|GO:0043624|GO:0009790|GO:0030879|GO:0010667|GO:0051048|GO:0007399|GO:0014032|GO:0060045|GO:0045785|GO:0030307|GO:0061098|GO:0051155|GO:0043497|GO:0043496|GO:0007169|GO:0055012|GO:0042060|GO:0042060|GO:…	NP_039258	Neuregulin 1	9375.86	22244.8	13.2654	14.3625
ASHG19A3A015211	-2.02801	-1.02006	2.02801	down	coding	NM_015148	PASK	RefSeq_coding	4530	chr2	-	242045514	242088878		ACACAGCCTGTGAATCTTGCTGACTATACATGGGAAGAGGTGTTTCGAGTAAACAAGCCA	23178	Hs.397891	GO:0005524|GO:0042802|GO:0000166|GO:0005515|GO:0004674|GO:0004871|GO:0016740|GO:0006468|GO:0006355|GO:0005794|GO:0005737	NP_055963	PAS domain containing serine/threonine kinase	1023.37	2343.5	10.0833	11.1033
ASHG19A3A027426	-2.18433	-1.12719	2.18433	down	coding	NM_001040158	H2AFY	RefSeq_coding	1937	chr5	-	134670070	134734928	NM_004893,	TTGAGGTGGAGGCCATAATCAATCCTACCAATGCTGACATTGACCTTAAAGATGACCTAG	9555	Hs.420272	GO:0003677|GO:0016568|GO:0007549|GO:0006334|GO:0001740|GO:0005694|GO:0000786|GO:0005634	NP_613258	H2A histone family, member Y	4662.24	11305.9	12.2672	13.3944
ASHG19A3A037009	-2.08676	-1.06126	2.08676	down	coding	NM_032272	MAF1	RefSeq_coding	1828	chr8	+	145159304	145162515		AAAGACATGAAGCTATTGGAGAACTCGAGCTTTGAAGCCATCAACTCACAGCTGACTGTG	84232	Hs.19673	GO:0030528|GO:0016480|GO:0005737|GO:0005622|GO:0005634	NP_115648	MAF1 homolog (S. cerevisiae)	143.471	336.615	7.24478	8.30604
ASHG19A3A048386	-2.18339	-1.12657	2.18339	down	coding	NM_001310	CREBL2	RefSeq_coding	3748	chr12	+	12764830	12798041		AATCTCAGCAGAACTCAAGCAGGCATACCAAGGCTGGGAAGACAGATGCTAATAGCAATT	1389	Hs.591156	GO:0046983|GO:0043565|GO:0003700|GO:0007049|GO:0006355|GO:0007165|GO:0006351|GO:0005634	NP_001301	CAMP responsive element binding protein-like 2	435.74	1078.71	8.86397	9.99054
ASHG19A3A024786	-2.39902	-1.26244	2.39902	down	coding	NM_015130	TBC1D9	RefSeq_coding	5507	chr4	-	141541936	141677471		AAGTGATATTCCAGTTGGCCCTAGCTGTGCTGGATGCAAATGTGGACAAACTGTTGAACT	23158	Hs.480819	GO:0005096|GO:0005097|GO:0005509|GO:0032313|GO:0005622	NP_055945	TBC1 domain family, member 9 (with GRAM domain)	142.328	383.823	7.23294	8.49538
ASHG19A3A047393	-5.86979	-2.55331	5.86979	down	coding	NM_004982	KCNJ8	RefSeq_coding	2381	chr12	-	21917889	21927747		TGGAGAAAAGTGGAATGGAGAAAAGTGGTTTGGAGTCCACTGTGTGTGTGACTAATGTCA	3764	Hs.102308	GO:0005524|GO:0015272|GO:0005242|GO:0005244|GO:0051607|GO:0007507|GO:0006811|GO:0001822|GO:0010107|GO:0006813|GO:0043330|GO:0032496|GO:0009268|GO:0042311|GO:0008282|GO:0016021|GO:0016020|GO:0005624|GO:0005792|GO:0005739|GO:0030016|GO:0042383|GO:0008076	NP_004973	Potassium inwardly-rectifying channel, subfamily J, member 8	744.111	4904.97	9.63053	12.1838
ASHG19A3A036735	-2.59406	-1.37521	2.59406	down	coding	NM_000067	CA2	RefSeq_coding	1666	chr8	+	86376130	86393721		TGGCAGCGCTAAACCGGGCCTTCAGAAAGTTGTTGATGTGCTGGATTCCATTAAAACAAA	760	Hs.155097	GO:0004089|GO:0016829|GO:0046872|GO:0008270|GO:0015670|GO:0001822|GO:0002009|GO:0042475|GO:0006730|GO:0045780|GO:0032849|GO:0045672|GO:0043627|GO:0010033|GO:0009268|GO:0006950|GO:0010043|GO:0046903|GO:0045177|GO:0030424|GO:0016323|GO:0005737|GO:0005829|GO:0005615|GO:0005902	NP_000058	Carbonic anhydrase II	6006.84	17289.7	12.6349	14.0101
ASHG19A3A047542	-2.13015	-1.09095	2.13015	down	coding	NM_004818	DDX23	RefSeq_coding	3288	chr12	-	49223539	49245957		AATCTTGGAGCAAGGCTTTGACCCACCCATCATTATTTTTGTCAACCAGAAGAAGGGCTG	9416	Hs.130098	GO:0005524|GO:0004004|GO:0008026|GO:0004386|GO:0016787|GO:0003676|GO:0000166|GO:0005515|GO:0008380|GO:0000375|GO:0000354|GO:0010467|GO:0000398|GO:0000398|GO:0005682|GO:0071013|GO:0005654|GO:0005634	NP_004809	DEAD (Asp-Glu-Ala-Asp) box polypeptide 23	526.469	1273.45	9.13656	10.2275
ASHG19A3A047194	-2.07542	-1.05341	2.07542	down	coding	NM_152640	DCP1B	RefSeq_coding	2105	chr12	-	2055213	2113677		TCTCGTGGTGTACAAAATGCTTCCAGAACTCAGAACCTGTTCGAGAAACTTCAGAGTACC	196513	Hs.130934	GO:0016787|GO:0005515|GO:0016070|GO:0043928|GO:0016071|GO:0000288|GO:0000184|GO:0005737|GO:0005829|GO:0005634	NP_689853	DCP1 decapping enzyme homolog B (S. cerevisiae)	101.258	234.674	6.73595	7.78935
ASHG19A3A044416	-2.16214	-1.11246	2.16214	down	coding	NM_004741	NOLC1	RefSeq_coding	3936	chr10	+	103911932	103923627		ATGAAGCTCCTTCTAAGCCAGCTGGTACCACCAAGAATTCTTCAAATAAGCCAGCTGTCA	9221	Hs.523238	GO:0005524|GO:0005525|GO:0034512|GO:0034513|GO:0008139|GO:0000166|GO:0005515|GO:0003700|GO:0033979|GO:0007049|GO:0007067|GO:0007000|GO:0008284|GO:0006364|GO:0042306|GO:0006970|GO:0015030|GO:0005737|GO:0005730|GO:0005654|GO:0005634	NP_004732	Nucleolar and coiled-body phosphoprotein 1	161.68	394.463	7.42125	8.53371
ASHG19A3A018498	-2.01329	-1.00956	2.01329	down	coding	NM_004738	VAPB	RefSeq_coding	3689	chr20	+	56964244	57021961		AACCTAAAGCTTGGCAACCCGACAGACCGAAATGTGTGTTTTAAGGTGAAGACTACAGCA	9217	Hs.182625	GO:0048487|GO:0019899|GO:0005515|GO:0046982|GO:0042803|GO:0005198|GO:0008219|GO:0030968|GO:0044419|GO:0045070|GO:0006665|GO:0019048|GO:0005794|GO:0012505|GO:0005783|GO:0005789|GO:0005789|GO:0005789|GO:0016021|GO:0005624|GO:0005886	NP_004729	VAMP (vesicle-associated membrane protein)-associated protein B and C	403.212	921.233	8.74828	9.75784
ASHG19A3A029416	-2.04963	-1.03536	2.04963	down	coding	NM_182966	NEDD9	RefSeq_coding	1329	chr6	-	11200606	11232915		TGTCCCCTGAATTCCTGTTTATCTTTGATTGTATGTGGGACATTGTATTTTCAGTACATT	4739	Hs.37982	GO:0005515|GO:0051017|GO:0007155|GO:0007049|GO:0051301|GO:0007010|GO:0007229|GO:0007067|GO:0040008|GO:0007165|GO:0005794|GO:0005938|GO:0030054|GO:0005737|GO:0005856|GO:0005925|GO:0030027|GO:0005634|GO:0005819	NP_892011	Neural precursor cell expressed, developmentally down-regulated 9	300.111	696.296	8.31963	9.35499
ASHG19A3A045113	-2.4856	-1.3136	2.4856	down	coding	NM_001008938	CKAP5	RefSeq_coding	6714	chr11	-	46765083	46867843		AAATTGGAGAAGGACGAGATCATCAAGTTGTATAGCTGTATCATTGGCAACATGATTTCG	9793	Hs.201253	GO:0005515|GO:0000086|GO:0000087|GO:0050658|GO:0051301|GO:0051297|GO:0030951|GO:0000278|GO:0000236|GO:0007051|GO:0005813|GO:0005829|GO:0005829|GO:0000930|GO:0015630	NP_055571	Cytoskeleton associated protein 5	825.42	2326.94	9.77995	11.0935
ASHG19A3A000632	-3.44697	-1.78533	3.44697	down	coding	NM_000933	PLCB4	RefSeq_coding	5425	chr20	+	9288446	9461460		AGAATTCCTAGAGAAACAGAATGAGCAGCTTTTGAAATCCTGTCATGCAGTGTCCCAAAC	5332	Hs.472101	GO:0005509|GO:0016787|GO:0004435|GO:0004629|GO:0005515|GO:0004871|GO:0035556|GO:0016042|GO:0005829	NP_877949	Phospholipase C, beta 4	210.599	818.86	7.80356	9.58888
ASHG19A3A031554	-2.2081	-1.14281	2.2081	down	coding	NM_032538	TTBK1	RefSeq_coding	7128	chr6	+	43211221	43255997		TGTCAATGATTAGATCGGGTCTCGGAAGGGAAGTAGCCATCACACCATTAAAAAGCCTGT	84630	Hs.485436	GO:0005524|GO:0000166|GO:0005515|GO:0004674|GO:0016740|GO:0006468|GO:0030054|GO:0005737|GO:0005634	NP_115927	Tau tubulin kinase 1	96.7888	238.339	6.66817	7.81098
ASHG19A3A017167	-2.31295	-1.20974	2.31295	down	coding	NM_001137551	LRRFIP1	RefSeq_coding	3599	chr2	+	238600806	238690288	NM_001137550,	TTCGATCTGAAGATGATGTCTTGGAAAACGGGACAGACATGCATGTAATGGACCTACAAA	9208	Hs.471779	GO:0003677|GO:0003725|GO:0005515|GO:0016564|GO:0006357|GO:0005737|GO:0005856|GO:0005634	NP_004726	Leucine rich repeat (in FLII) interacting protein 1	121.802	316.763	7.01066	8.2204
ASHG19A3A054853	-2.17971	-1.12414	2.17971	down	coding	NM_005153	USP10	RefSeq_coding	3399	chr16	+	84733554	84813525		AGAATGTAACCCTAATCCATAAACCAGTGTCGTTGCAACCCCGTGGGCTGATCAATAAAG	9100	Hs.136778	GO:0008234|GO:0042980|GO:0002039|GO:0008233|GO:0005515|GO:0004221|GO:0004843|GO:0004843|GO:0030330|GO:0006281|GO:0016579|GO:0016579|GO:0006511|GO:0005737|GO:0005769|GO:0045111|GO:0005634	NP_005144	Ubiquitin specific peptidase 10	512.12	1269.22	9.09664	10.2208
ASHG19A3A014336	-3.2994	-1.7222	3.2994	down	coding	NM_001099771	POTEF	RefSeq_coding	4337	chr2	-	130831107	130886795	NR_027480,NM_207355,NM_174981,NM_001145442,NM_001137671,NM_001136213,NM_001083538,NM_001005356,	TTCTCAAGATCTATCTGGACAGACGGCCAGAGAGTATGCTGTTTCTAGTCATCATCATGT	728378	Hs.580547	GO:0005524|GO:0005938|GO:0005737	NP_001093241	POTE ankyrin domain family, member F	315.818	1174.73	8.39405	10.1163
ASHG19A3A016404	-3.45514	-1.78874	3.45514	down	coding	NM_001172435	RAB3GAP1	RefSeq_coding	4939	chr2	+	135809834	135928277		TCAGCATGGGAAACTTACACTGCTGCATAATGGAGAACCTCTCTACATTCCAGTAACCCA	22930	Hs.306327	GO:0005096|GO:0005097|GO:0017137|GO:0046982|GO:0043087|GO:0005813|GO:0005737|GO:0005730|GO:0005634|GO:0005625	NP_036365	RAB3 GTPase activating protein subunit 1 (catalytic)	165.48	645.647	7.45317	9.24192
ASHG19A3A019092	-2.33073	-1.22078	2.33073	down	coding	NM_004540	NCAM2	RefSeq_coding	3699	chr21	+	22370632	22911214		TTATGTCTGCAGGGCCACAAATAAGGCAGGAGAAGATGAAAAGCAAGCTTTCCTCCAAGT	4685	Hs.473450	GO:0007155|GO:0007158|GO:0030424|GO:0016021|GO:0005886	NP_004531	Neural cell adhesion molecule 2	275.818	726.009	8.19266	9.41344
ASHG19A3A053083	-2.18027	-1.12451	2.18027	down	coding	NM_015492	C15orf39	RefSeq_coding	4443	chr15	+	75494220	75504508		ACCTTCCTATAGAAAGTCTTCGTGTGTCCTAGGACTTGGCTATCGTAGAGTGGTACCTTA	56905	Hs.17936		NP_056307	Chromosome 15 open reading frame 39	84.3168	205.191	6.4722	7.59671
ASHG19A3A016365	-3.2212	-1.6876	3.2212	down	coding	NM_001083538	POTEE	RefSeq_coding	3440	chr2	+	131975923	132022416	NR_027480,NM_207355,NM_174981,NM_001145442,NM_001137671,NM_001136213,NM_001099771,NM_001005356,	TTCTCAAGATCTATCTGGACAGACGGCCAGAGAGTATGCTGTTTCTAGTCATCATCATGT	445582	Hs.686146	GO:0005524	NP_001077007	POTE ankyrin domain family, member E	323.968	1175.3	8.42979	10.1174
ASHG19A3A025416	-2.04093	-1.02923	2.04093	down	coding	NM_015173	TBC1D1	RefSeq_coding	5688	chr4	+	37892719	38140793		TTTGCTTGTCTGATTAAGGAAGACGCTGTCCACCGGCAGAGTATCTGCTATGTGTTCAAA	23216	Hs.176503	GO:0005096|GO:0005097|GO:0032313|GO:0005622|GO:0005634	NP_055988	TBC1 (tre-2/USP6, BUB2, cdc16) domain family, member 1	122.451	280.774	7.02008	8.0493
ASHG19A3A031646	-3.08618	-1.62582	3.08618	down	coding	NM_014464	TINAG	RefSeq_coding	1804	chr6	+	54173202	54254950		TTAAATTTCGCCTTGGCACTTTGCCACCTAGTCCCATGCTCCTGAGCATGAATGAAATGA	27283	Hs.127011	GO:0004197|GO:0000166|GO:0030247|GO:0005044|GO:0007443|GO:0007155|GO:0006955|GO:0006508|GO:0005604|GO:0005576	NP_055279	Tubulointerstitial nephritis antigen	76.1204	262.964	6.32999	7.95581
ASHG19A3A012436	-2.56317	-1.35793	2.56317	down	coding	NM_031218	ZNF93	RefSeq_coding	2794	chr19	+	20011721	20046382		CTGGTTCTATTTTAATGTAGCACTGGAAGTGTGTGGCAGAAGAATTAGTCAAAGAAATAA	81931	Hs.301059	GO:0003677|GO:0046872|GO:0003700|GO:0008270|GO:0006355|GO:0006351|GO:0005622|GO:0005634	NP_112495	Zinc finger protein 93	1523.95	4344.12	10.6543	12.0122
ASHG19A3A050674	-14.7327	-3.88095	14.7327	down	coding	NM_021794	ADAM30	RefSeq_coding	2972	chr1	-	120436156	120439113		AAGGTATAGTCTTGTTTCTCAGAATCCCAGGGAACAAAGCAATTGTCTGCCTCTCCCTCT	11085	Hs.283011	GO:0046872|GO:0004222|GO:0008237|GO:0008233|GO:0008270|GO:0006508|GO:0016021|GO:0016020	NP_068566	ADAM metallopeptidase domain 30	341.591	5672.69	8.50541	12.3864
ASHG19A3A036191	-2.35861	-1.23794	2.35861	down	coding	NM_015193	ARC	RefSeq_coding	2985	chr8	-	143692409	143695833		CACCTTACCCCAGAGACAGACTCTTTTTGTAAGATTTTGTTAATAAAACACTGAAACTTC	23237	Hs.40888	GO:0009952|GO:0006897|GO:0007492|GO:0007612|GO:0007275|GO:0048168|GO:0001669|GO:0015629|GO:0030054|GO:0042995|GO:0005737|GO:0031410|GO:0043197|GO:0005768|GO:0005886|GO:0014069|GO:0045211|GO:0045202	NP_056008	Activity-regulated cytoskeleton-associated protein	159.701	425.757	7.40435	8.64229
ASHG19A3A046891	-2.08734	-1.06167	2.08734	down	coding	NM_032021	TMEM133	RefSeq_coding	1866	chr11	+	100862810	100864665		GTCGGATGTTAAGATATTATATTTCAGTACTAGGAGCTTCTTTGCAGTCATTAACATGAC	83935	Hs.44004	GO:0016021|GO:0016020	NP_114410	Transmembrane protein 133	532.53	1262.18	9.15256	10.2142
ASHG19A3A008500	-2.09242	-1.06517	2.09242	down	coding	NM_001075099	SKAP1	RefSeq_coding	1598	chr17	-	46210801	46507594		CTGGTTGTTCTGGCTGGTTTGAAAAGCACAAATAAACTTGGGATGTGGTTCCTTGCCATG	8631	Hs.316931	GO:0042169|GO:0005070|GO:0003823|GO:0005515|GO:0032403|GO:0019901|GO:0016563|GO:0050852|GO:0045944|GO:0005737|GO:0005634|GO:0005886	NP_003717	Src kinase associated phosphoprotein 1	295.294	698.314	8.29405	9.35922
ASHG19A3A008023	-2.11479	-1.08051	2.11479	down	coding	NM_004169	SHMT1	RefSeq_coding	2540	chr17	-	18231194	18266856	ENST00000419974,	AGACTGGCAAAGAGATTCTGTACAACCTGGAGTCTCTTATCAATTCTGCTGTGTTCCCTG	6470	Hs.513987	GO:0008732|GO:0016597|GO:0004372|GO:0004372|GO:0042803|GO:0030170|GO:0016740|GO:0006565|GO:0045329|GO:0034641|GO:0046655|GO:0046655|GO:0019264|GO:0006730|GO:0051289|GO:0051262|GO:0009113|GO:0006766|GO:0006767|GO:0005737|GO:0005829|GO:0005829|GO:0005739|GO:0005634	NP_683718	Serine hydroxymethyltransferase 1 (soluble)	413.476	989.484	8.78613	9.86664
ASHG19A3A018790	-3.4392	-1.78207	3.4392	down	coding	NM_014474	SMPDL3B	RefSeq_coding	1890	chr1	+	28261503	28285662		CAAGCATACTTCTTTTGCGTATTATGTTTAACTCACAAAACAAAGCTCATCATGCGTTTG	27293	Hs.123659	GO:0016798|GO:0004767|GO:0008152|GO:0006685|GO:0005576|GO:0005615	NP_055289	Sphingomyelin phosphodiesterase, acid-like 3B	460.178	1791.46	8.93982	10.7219
ASHG19A3A046620	-2.00525	-1.00378	2.00525	down	coding	NM_006842	SF3B2	RefSeq_coding	2902	chr11	+	65819815	65836382		AATTGACATCGACTACCAGAAACTGCATGATGCCTTCTTCAAGTGGCAGACCAAGCCAAA	10992	Hs.406423	GO:0003676|GO:0005515|GO:0008380|GO:0010467|GO:0044419|GO:0006397|GO:0000398|GO:0000398|GO:0005689|GO:0071013|GO:0005654|GO:0005634|GO:0005681	NP_006833	Splicing factor 3b, subunit 2, 145kDa	1680.18	3765.61	10.7994	11.8032
CUST_31_PI426249100	-2.51541	-1.33079	2.51541	down	coding	NM_002147_Exon2-	NM_002147	HOX cluster	1199	chr17	-	46668619	46669818	NM_002147,	TGATTCGCTTTTGGTATTTGTTTGTAGCTTTCCTGGAAGTCAAATAAATGTTTCCCCCAC						67.2776	189.558	6.15066	7.48145
ASHG19A3A017616	-2.28278	-1.19079	2.28278	down	coding	NM_006047	RBM12	RefSeq_coding	6640	chr20	-	34236887	34252838		AAAGCTGGATATTGTGGAAGATAGTATTTATATAGCTTATGGACCCAATGGGAAAGCAAC	8904	Hs.246413	GO:0005544|GO:0001786|GO:0005215|GO:0006629|GO:0016192	NP_690905	Copine I	87.8223	223.106	6.52677	7.71756
ASHG19A3A005443	-2.58633	-1.37091	2.58633	down	coding	NM_031203	HNRNPM	RefSeq_coding	2436	chr19	+	8509802	8553994		ACATGCCAGGAGAGCAATGCAAAAGGCTGGAAGACTTGGAAGCACAGTATTTGTAGCAAA	4670	Hs.465808	GO:0003723|GO:0000166|GO:0005515|GO:0019904|GO:0008380|GO:0000380|GO:0010467|GO:0000398|GO:0000398|GO:0071013|GO:0005887|GO:0016363|GO:0005730|GO:0005654|GO:0005654|GO:0005634|GO:0042382|GO:0005681	NP_112480	Heterogeneous nuclear ribonucleoprotein M	221.6	647.517	7.87468	9.24559
ASHG19A3A001043	-2.25421	-1.17262	2.25421	down	coding	NM_001017977	DCAF6	RefSeq_coding	3243	chr1	+	167905907	168045079		CTGGACACCACACACATCATCAGTCTGATAACAATAATGAAAAGCTGAGCCCCAAACCAG	55827	Hs.435741	GO:0030374|GO:0045944|GO:0016567|GO:0080008|GO:0005634	NP_060912	DDB1 and CUL4 associated factor 6	334.709	854.008	8.47491	9.64753
ASHG19A3A012224	-2.69908	-1.43247	2.69908	down	coding	NM_018230	NUP133	RefSeq_coding	4170	chr1	-	229577044	229644088		ATATTGGCAGAAGACTTGGAAGGGTCTTTAGCATCTTCAGTTGCTGGACCAAACAGTGAG	55746	Hs.12457	GO:0005487|GO:0005515|GO:0000087|GO:0005975|GO:0015758|GO:0008645|GO:0006406|GO:0000278|GO:0000236|GO:0006999|GO:0048339|GO:0015031|GO:0010827|GO:0055085|GO:0016032|GO:0031080|GO:0031080|GO:0000777|GO:0000940|GO:0005829|GO:0005635|GO:0005635|GO:0005643|GO:0005634	NP_060700	Nucleoporin 133kDa	87.9768	264.15	6.53033	7.9628
ASHG19A3A004800	-2.00875	-1.0063	2.00875	down	coding	NM_015200	PDS5A	RefSeq_coding	6726	chr4	-	39824483	39979483		ACGGACACAAGCGCACACACTCCCGGAAGATCGCTTACCCTCCGGGGGTAAAAGAGATCA						129.068	291.277	7.09705	8.10335
ASHG19A3A023630	-2.27604	-1.18652	2.27604	down	coding	NM_003907	EIF2B5	RefSeq_coding	2898	chr3	+	183852809	183863098	AK310207,	AACACTACAGCGGGGCAAAGAGGAGAACATTTCTTGTGACAATCTCGTCCTGGAAATCAA	8893	Hs.283551	GO:0005085|GO:0005085|GO:0005085|GO:0005515|GO:0016740|GO:0003743|GO:0003743|GO:0031369|GO:0016070|GO:0014002|GO:0048708|GO:0044267|GO:0051716|GO:0010467|GO:0042552|GO:0032057|GO:0014003|GO:0001541|GO:0045948|GO:0006417|GO:0009749|GO:0009408|GO:0009408|GO:0009408|GO:0043434|GO:0006950|GO:0006412|GO:0006413|GO:0006413|GO:0005737|GO:0005829|GO:0005851|GO:0005634	NP_003898	Eukaryotic translation initiation factor 2B, subunit 5 epsilon, 82kDa	820.804	2118.75	9.77134	10.9579
ASHG19A3A008953	-2.30598	-1.20538	2.30598	down	coding	NM_002945	RPA1	RefSeq_coding	4345	chr17	+	1733272	1802848		TACTGTTTCTAAGGCTTATGGTGCTTCAAAGACATTTGGAAAAGCTGCAGGTCCCAGCCT	6117	Hs.461925	GO:0003677|GO:0003682|GO:0046872|GO:0005515|GO:0003697|GO:0000730|GO:0006310|GO:0006281|GO:0006260|GO:0006271|GO:0006261|GO:0000082|GO:0000216|GO:0000084|GO:0000075|GO:0051276|GO:0006302|GO:0000724|GO:0030097|GO:0048873|GO:0001701|GO:0007126|GO:0000278|GO:0006289|GO:0000718|GO:0006297|GO:0008284|GO:0000723|GO:0000722|GO:0032201|GO:0006283|GO:0005662|GO:0016605|GO:0015629|GO:0000794|GO:0005737|GO:…	NP_002936	Replication protein A1, 70kDa	186.669	486.979	7.62707	8.83245
ASHG19A3A010906	-2.03581	-1.0256	2.03581	down	coding	NM_139159	DPP9	RefSeq_coding	4286	chr19	-	4675245	4723855		AATGAATGCAAGACCGGCTTCTGCCATTTGTACAAAGTCACCGCCGTTTTAAAATCCCAG	91039	Hs.515081	GO:0004177|GO:0008233|GO:0008236|GO:0006508|GO:0005737|GO:0005829|GO:0016020	NP_631898	Dipeptidyl-peptidase 9	102.257	232.899	6.75179	7.7774
ASHG19A3A010343	-2.15323	-1.1065	2.15323	down	coding	NM_005603	ATP8B1	RefSeq_coding	5949	chr18	-	55313660	55470327		TACATTTGGTTAACTATCATCCTGGCTGTTGCTGTGTGCTTACTACCCGTCGTTGCCATT	5205	Hs.216623	GO:0005524|GO:0016887|GO:0015662|GO:0016787|GO:0016820|GO:0000287|GO:0000166|GO:0004012|GO:0004012|GO:0006754|GO:0006200|GO:0015721|GO:0008206|GO:0034220|GO:0034220|GO:0015914|GO:0055085|GO:0016324|GO:0005887|GO:0005624|GO:0005886	NP_005594	ATPase, aminophospholipid transporter, class I, type 8B, member 1	805.7	1965.74	9.74221	10.8487
ASHG19A3A048018	-2.14461	-1.10071	2.14461	down	coding	NM_006768	BRAP	RefSeq_coding	4043	chr12	-	112079950	112123790		AATATGCGGCCACATAGGATGTGGACGGTATGTCAGTCGACATGCTTATAAGCACTTTGA	8315	Hs.530940	GO:0042802|GO:0016874|GO:0046872|GO:0008139|GO:0000166|GO:0005515|GO:0004842|GO:0008270|GO:0000165|GO:0007265|GO:0009968|GO:0016567|GO:0005737|GO:0000151	NP_006759	BRCA1 associated protein	92.4851	220.719	6.6026	7.70331
ASHG19A3A043615	-2.79451	-1.48259	2.79451	down	coding	NM_018706	DHTKD1	RefSeq_coding	5202	chr10	+	12110933	12165223		TTGAATACCAACGCCAGTTCCGCAAGGATGTGATTATTGATCTGTTGTGCTACAGGCAGT	55526	Hs.104980	GO:0016491|GO:0004591|GO:0030976|GO:0006096|GO:0055114|GO:0005739	NP_061176	Dehydrogenase E1 and transketolase domain containing 1	146.086	461.112	7.27262	8.75522
ASHG19A3A016140	-2.35319	-1.23462	2.35319	down	coding	NM_006588	SULT1C4	RefSeq_coding	1664	chr2	+	108994420	109004270		AACGGGCACCGACTCATCAACGATTTCCTTTCCTCGAAATGAAAATCCCATCCTTAGGAT	27233	Hs.312644	GO:0008146|GO:0008146|GO:0016740|GO:0050427|GO:0051923|GO:0006805|GO:0005575|GO:0005737|GO:0005829	NP_006579	Sulfotransferase family, cytosolic, 1C, member 4	65.3756	172.336	6.11005	7.34466
ASHG19A3A050578	-5.84609	-2.54747	5.84609	down	coding	NM_005407	SALL2	RefSeq_coding	4931	chr14	-	21989233	22005337		TGTCAAGAACAGACGGGAGATATTAGTGTCTTTCCCTCTATCATTAAAGGTGTTTTAACC	6297	Hs.416358	GO:0003677|GO:0046872|GO:0003700|GO:0008270|GO:0006355|GO:0006351|GO:0005622|GO:0005634	NP_005398	Sal-like 2 (Drosophila)	1153.69	7581.29	10.2613	12.8088
ASHG19A3A041798	-2.36553	-1.24216	2.36553	down	coding	NM_001173474	ASMTL	RefSeq_coding	2101	chrY	-	1472031	1521870	NM_004192,NM_001173473,	AAGGTGTTCGATTTGTTAAAAGATGAAGCACCCCAGAAGGCTGCGGATATTGCCAGCAAA	8623	Hs.533514	GO:0017096|GO:0030187|GO:0005575|GO:0005737	NP_004183	Acetylserotonin O-methyltransferase-like	159.01	425.161	7.39717	8.63933
CUST_5_PI418767722	-3.50047	-1.80755	3.50047	down	coding	NM_000841	GRM4	RefSeq_coding	3884	chr6	-	33989628	34101443		ACACAAAAAAGCCAAAACGAAAACAAATCTCGAGTGTGTTGCCAAGTGCTGCGTCCTCCT	2914	Hs.654847	GO:0004930|GO:0008066|GO:0004872|GO:0007186|GO:0000187|GO:0007196|GO:0007612|GO:0043526|GO:0007269|GO:0043410|GO:0007268|GO:0031410|GO:0005887|GO:0005622|GO:0005886	NP_000832	Glutamate receptor, metabotropic 4	103.52	407.703	6.77055	8.5781
ASHG19A3A051730	-2.51508	-1.33061	2.51508	down	coding	NM_001085	SERPINA3	RefSeq_coding	1629	chr14	+	95078713	95090389		AGAACATCTTCTTCATGAGCAAAGTCACCAATCCCAAGCAAGCCTAGAGCTTGCCATCAA	12	Hs.534293	GO:0003677|GO:0030414|GO:0005515|GO:0004867|GO:0004867|GO:0006953|GO:0006954|GO:0030277|GO:0010951|GO:0019216|GO:0030162|GO:0005576|GO:0005576|GO:0005622|GO:0005634	NP_001076	Serpin peptidase inhibitor, clade A (alpha-1 antiproteinase, antitrypsin), member 3	19109.8	51942.9	14.3007	15.6314
ASHG19A3A054926	-2.45743	-1.29715	2.45743	down	coding	NM_003119	SPG7	RefSeq_coding	3096	chr16	+	89574804	89624173		TGCCAAAAAGAGCAAGATCCTGTCCAAGGAAGAACAGAAAGTGGTTGCGTTTCATGAGTC	6687	Hs.185597	GO:0005524|GO:0046872|GO:0004222|GO:0017111|GO:0000166|GO:0008233|GO:0051082|GO:0008270|GO:0008089|GO:0008219|GO:0007005|GO:0007399|GO:0030163|GO:0006508|GO:0016021|GO:0016020|GO:0031966|GO:0005739	NP_955399	Spastic paraplegia 7 (pure and complicated autosomal recessive)	257.8	714.074	8.09344	9.39059
ASHG19A3A048272	-2.39227	-1.25838	2.39227	down	coding	NM_014865	NCAPD2	RefSeq_coding	4806	chr12	+	6603297	6641132		AAACTGTCAGATGAGTCCATCTTCAGTGCTTTTTTGTCAGTTGTAGGCAAGCTGCGACGT	9918	Hs.5719	GO:0042393|GO:0042393|GO:0005515|GO:0007049|GO:0051301|GO:0006886|GO:0007067|GO:0007076|GO:0007076|GO:0016192|GO:0000793|GO:0000796|GO:0000797|GO:0005737|GO:0005737|GO:0030117|GO:0000228|GO:0005634|GO:0045120	NP_055680	Non-SMC condensin I complex, subunit D2	1355.77	3628	10.4926	11.751
ASHG19A3A045947	-2.12596	-1.08811	2.12596	down	coding	NM_012305	AP2A2	RefSeq_coding	4616	chr11	+	925840	1012239		AAGAAGTTGATCCTAATCCTGCGAATTTCGTGGGAGCTGGAATCATCCACACGAAAACCA	161	Hs.19121	GO:0008289|GO:0003674|GO:0008565|GO:0007411|GO:0006897|GO:0007173|GO:0006886|GO:0042059|GO:0048011|GO:0050690|GO:0050690|GO:0007268|GO:0016032|GO:0030122|GO:0005905|GO:0005829|GO:0030666|GO:0030117|GO:0005886|GO:0005886	NP_036437	Adaptor-related protein complex 2, alpha 2 subunit	1281.7	3073.74	10.4115	11.4996
ASHG19A3A009715	-3.17737	-1.66783	3.17737	down	coding	NM_022827	SPATA20	RefSeq_coding	2640	chr17	+	48624561	48633211		ACTATGCCACCAATGGTGCCAAGTTCCTGAAGCGGCACATGTTTGATGTGGCCAGTGGCC	64847	Hs.103147	GO:0003824|GO:0004476|GO:0005515|GO:0030154|GO:0006013|GO:0007275|GO:0007283|GO:0005576	NP_073738	Spermatogenesis associated 20	107.002	381.992	6.82059	8.48842
ASHG19A3A041649	-3.88877	-1.95931	3.88877	down	coding	NM_016452	CAPN9	RefSeq_coding	2484	chr1	+	230883160	230937749		CTGACTTCCATGTAGCTCCAGTCATTGTGATCAGACATCCTTTATAAAACATGTTTTTAT	10753	Hs.498021	GO:0005509|GO:0004198|GO:0008233|GO:0007586|GO:0006508|GO:0005575|GO:0005622	NP_057536	Calpain 9	624.931	2744.84	9.37687	11.3362
ASHG19A3A051397	-2.15539	-1.10795	2.15539	down	coding	NM_005399	PRKAB2	RefSeq_coding	5431	chr1	-	146626686	146644129		AGGAGGTCTTCATCTCTGGGTCCTTCAACAATTGGAGCACCAAGATTCCACTGATTAAGA	5565	Hs.50732	GO:0005515|GO:0019901|GO:0006853|GO:0007050|GO:0044255|GO:0006112|GO:0008286|GO:0042304|GO:0046320|GO:0007165|GO:0031588|GO:0005952|GO:0005829|GO:0005829|GO:0005654	NP_005390	Protein kinase, AMP-activated, beta 2 non-catalytic subunit	107.348	259.073	6.82502	7.93297
ASHG19A3A054979	-2.20083	-1.13805	2.20083	down	coding	NM_006224	PITPNA	RefSeq_coding	3660	chr17	-	1421284	1466110		TACAAGGCAGAGGAAGACCCAGCAAAATTTAAATCTATCAAAACAGGCCGAGGACCCTTG	5306	Hs.429819	GO:0008525|GO:0008526|GO:0005543|GO:0005515|GO:0007411|GO:0006629|GO:0015914|GO:0006810|GO:0007601|GO:0005737|GO:0005622	NP_006215	Phosphatidylinositol transfer protein, alpha	352.651	880.949	8.55337	9.69142
ASHG19A3A045864	-2.64228	-1.40178	2.64228	down	coding	NM_145013	C11orf45	RefSeq_coding	3648	chr11	-	128769467	128775592		GCACAGTGATAATCCATTTTCTTCATTGTAACCCCACAGTGTATGTATTCCACATTAAAT	219833	Hs.351133	GO:0005576	NP_659450	Chromosome 11 open reading frame 45	357.739	1067.69	8.57502	9.9768
ASHG19A3A008139	-2.191	-1.13159	2.191	down	coding	NM_000386	BLMH	RefSeq_coding	2417	chr17	-	28575222	28619074		TACAACAACCAGCCCATTGACTTCCTGAAAAAGATGGTTGCTGCCTCCATCAAAGATGGA	642	Hs.371914	GO:0004177|GO:0004180|GO:0004197|GO:0008234|GO:0008233|GO:0005515|GO:0006508|GO:0042493|GO:0009636|GO:0005737|GO:0005634|GO:0005625	NP_000377	Bleomycin hydrolase	177.939	441.362	7.56156	8.69315
ASHG19A3A010160	-2.49319	-1.31799	2.49319	down	coding	NM_006796	AFG3L2	RefSeq_coding	2963	chr18	-	12329107	12377194		TTAATACAACAACAAATGTCGTCATTTTGGCCGGCACCAATCGACCAGATATCCTGGACC	10939	Hs.726355	GO:0005524|GO:0046872|GO:0004222|GO:0017111|GO:0000166|GO:0008233|GO:0051082|GO:0008270|GO:0007409|GO:0008219|GO:0048747|GO:0042552|GO:0021675|GO:0007528|GO:0030163|GO:0006508|GO:0040014|GO:0060013|GO:0016021|GO:0016020|GO:0005743|GO:0005739	NP_006787	AFG3 ATPase family gene 3-like 2 (S. cerevisiae)	206.335	583.99	7.77508	9.09307
ASHG19A3A000651	-3.01764	-1.59342	3.01764	down	coding	NM_001001390	CD44	RefSeq_coding	5001	chr11	+	35160416	35253946		AGCACAGACAGAATCCCTGCTACCAATATGGACTCCAGTCATAGTATAACGCTTCAGCCT	960	Hs.502328	GO:0005518|GO:0005540|GO:0005515|GO:0004888|GO:0016337|GO:0007160|GO:0019221|GO:0060333|GO:0043518|GO:0043066|GO:0070374|GO:0033138|GO:0050731|GO:0005794|GO:0009986|GO:0005737|GO:0005887|GO:0005886	NP_001189486	CD44 molecule (Indian blood group)	879.721	2992.89	9.86474	11.4582
ASHG19A3A004921	-2.10471	-1.07362	2.10471	down	coding	NM_016732	RALY	RefSeq_coding	1589	chr20	+	32581731	32668065		AAGAGAGCAGCATCTGCCATATACAGTGGCTACATCTTTGACTATGATTACTACCGGGAC	22913	Hs.136947	GO:0003723|GO:0000166|GO:0008380|GO:0000398|GO:0071013|GO:0030530|GO:0005634	NP_057951	RNA binding protein, autoantigenic (hnRNP-associated with lethal yellow homolog (mouse))	321.297	764.441	8.41674	9.49036
ASHG19A3A006867	-2.31644	-1.21191	2.31644	down	coding	NM_199259	TPTE	RefSeq_coding	2145	chr21	-	10906742	10990920		CCGAGGAGGCACCTGCGAAAGAAAGTGTGTTAGCACGACTTTCCAAGTTTGAAGTTGAAG	7179	Hs.122986	GO:0016787|GO:0005216|GO:0004725|GO:0008138|GO:0006811|GO:0006470|GO:0007165|GO:0055085|GO:0016021|GO:0016020	NP_954870	Transmembrane phosphatase with tensin homology	129.832	339.139	7.10394	8.31585
ASHG19A3A017829	-2.68109	-1.42282	2.68109	down	coding	NM_001719	BMP7	RefSeq_coding	4049	chr20	-	55743808	55841707		ATAAATAGACAAAATGAAAAGGGTTTGACCTTGCAATAAAAGGAGACGTTTGGTTCTGGC	655	Hs.473163	GO:0005125|GO:0008083|GO:0008201|GO:0005515|GO:0005515|GO:0030509|GO:0060395|GO:0048646|GO:0007411|GO:0060445|GO:0048754|GO:0051216|GO:0048468|GO:0048596|GO:0030326|GO:0009880|GO:0060272|GO:0030855|GO:0001837|GO:0001654|GO:0040007|GO:0048762|GO:0060485|GO:0001707|GO:0001823|GO:0072136|GO:0072133|GO:0001656|GO:0043407|GO:0045746|GO:0045786|GO:0060548|GO:0032582|GO:0072125|GO:0072040|GO:0045839|GO:…	NP_001710	Bone morphogenetic protein 7	10533	30879.6	13.4367	14.8595
ASHG19A3A029781	-2.04546	-1.03242	2.04546	down	coding	NM_005452	WDR46	RefSeq_coding	2363	chr6	-	33246879	33257304		ACCAAAAAATGCTTACATCTTAAAGAAGTCTCGGATCTCTAAGAAGCCTCAGGTCCCGAA	9277	Hs.520063	GO:0003674|GO:0008150|GO:0005575	NP_005443	WD repeat domain 46	93.5232	212.831	6.61959	7.65202
ASHG19A3A012223	-2.06183	-1.04393	2.06183	down	coding	NM_001128849	SMARCA4	RefSeq_coding	5589	chr19	+	11071807	11172959		TATCCATGACACAGCCAGCAGTGTGGCACGTGGGCTACAATTCCAGCGTGGCCTTCAGTT	6597	Hs.327527	GO:0005524|GO:0003677|GO:0008094|GO:0050681|GO:0004386|GO:0070577|GO:0016818|GO:0042802|GO:0000166|GO:0002039|GO:0047485|GO:0005515|GO:0016563|GO:0003714|GO:0006338|GO:0045749|GO:0060766|GO:0032582|GO:0010553|GO:0007399|GO:0010552|GO:0051091|GO:0045944|GO:0016514|GO:0071778|GO:0071565|GO:0071564|GO:0005634	NP_003063	SWI/SNF related, matrix associated, actin dependent regulator of chromatin, subfamily a, member 4	168.348	392.044	7.48001	8.52394
ASHG19A3A022608	-2.22207	-1.1519	2.22207	down	coding	NM_173546	KLHDC8B	RefSeq_coding	1993	chr3	+	49209067	49213918		AGGACACACATATGCTTACACCTACCTTTATCACCATTCGTTCATGAATCATGCCTAGCT	200942	Hs.13781	GO:0005737	NP_775817	Kelch domain containing 8B	298.285	750.545	8.30926	9.46116
ASHG19A3A010602	-2.38079	-1.25144	2.38079	down	coding	NM_018255	ELP2	RefSeq_coding	2494	chr18	+	33709886	33754607		ATCATTGCTCATGCTTTCCACGGAGCGTTGCACCTTTGGAAACAGAATACAGTTAACCCA	55250	Hs.8739	GO:0003677|GO:0016944|GO:0019901|GO:0046425|GO:0006357|GO:0016591|GO:0005794|GO:0005737|GO:0005737|GO:0005730|GO:0005634|GO:0008023	NP_060725	Elongation protein 2 homolog (S. cerevisiae)	3513.5	9277.25	11.8554	13.1068
ASHG19A3A016583	-2.5272	-1.33754	2.5272	down	coding	NM_015530	GORASP2	RefSeq_coding	2504	chr2	+	171785710	171823639		TTGGGAGTGAGCATTCGTTTCTGCAGCTTTGATGGGGCAAATGAAAATGTTTGGCATGTG	26003	Hs.431317	GO:0007030|GO:0005794|GO:0005797|GO:0000139|GO:0016020	NP_056345	Golgi reassembly stacking protein 2, 55kDa	212.576	609.076	7.81747	9.15501
ASHG19A3A028304	-3.80086	-1.92633	3.80086	down	coding	NM_181524	PIK3R1	RefSeq_coding	5823	chr5	+	67584251	67597647		TTTTTCATTGTCGGATACAGGCATTTCAAAGGGAAACCGTTGAAATGCATAACCTGCAAA	5295	Hs.132225	GO:0005545|GO:0046935|GO:0051117|GO:0043125|GO:0005516|GO:0030331|GO:0043559|GO:0005158|GO:0043560|GO:0005159|GO:0043548|GO:0035014|GO:0051219|GO:0005161|GO:0008022|GO:0005515|GO:0019904|GO:0019901|GO:0019903|GO:0030971|GO:0031625|GO:0030183|GO:0031295|GO:0050852|GO:0007596|GO:0071398|GO:0071445|GO:0007173|GO:0008543|GO:0006006|GO:0060396|GO:0008286|GO:0008286|GO:0048009|GO:0048009|GO:0044419|GO:…	NP_852665	Phosphoinositide-3-kinase, regulatory subunit 1 (alpha)	68.3797	290.909	6.17522	8.10154
ASHG19A3A045915	-2.20549	-1.1411	2.20549	down	coding	NM_025092	ATHL1	RefSeq_coding	3270	chr11	+	289137	295687		TTGCCAAAAAGGAACTTTTCATGTCATGCAGTTGAGGGGACTTAGTCTCAATCCCAGGCT	80162	Hs.353181	GO:0016798|GO:0005975	NP_079368	ATH1, acid trehalase-like 1 (yeast)	183.864	458.298	7.60643	8.74753
ASHG19A3A009792	-2.69511	-1.43034	2.69511	down	coding	NM_000717	CA4	RefSeq_coding	1165	chr17	+	58227301	58236904		TTCTTCTTCTCTGGCTACGATAAGAAGCAAACGTGGACTGTCCAAAATAACGGGCACTCA	762	Hs.89485	GO:0004089|GO:0016829|GO:0046872|GO:0005515|GO:0008270|GO:0015701|GO:0006730|GO:0048513|GO:0042493|GO:0048545|GO:0050896|GO:0007601|GO:0005793|GO:0005794|GO:0031362|GO:0016324|GO:0016323|GO:0031526|GO:0009986|GO:0005624|GO:0048471|GO:0044459|GO:0005791|GO:0042383|GO:0016529|GO:0030667|GO:0005802|GO:0030658	NP_000708	Carbonic anhydrase IV	75.6082	228.239	6.31914	7.74948
ASHG19A3A051652	-2.94029	-1.55596	2.94029	down	coding	NM_001010860	C14orf174	RefSeq_coding	2025	chr14	+	77843761	77857587		ATTTGAGCATCTTAATTGGGATCCAGAGGAAGTTGCAGAGTGGATTAGCCAGCTAGGCTT	161394	Hs.421961		NP_001010860	Sterile alpha motif domain containing 15	109.148	360.408	6.84831	8.40427
ASHG19A3A004916	-2.06908	-1.04899	2.06908	down	coding	NM_001077488	GNAS	RefSeq_coding	1586	chr20	+	57466768	57486249	NM_016592,	CGCAGGCTGCAAGGAGCAACAGCGATGGCAGTGAGAAGGCAACCAAAGTGCAGGACATCA	2778	Hs.125898	GO:0031683|GO:0005525|GO:0003924|GO:0003924|GO:0004016|GO:0019001|GO:0005085|GO:0042802|GO:0035255|GO:0003674|GO:0031852|GO:0000166|GO:0005515|GO:0004871|GO:0004871|GO:0007186|GO:0006184|GO:0006184|GO:0007190|GO:0007191|GO:0007191|GO:0007596|GO:0006171|GO:0051216|GO:0071377|GO:0048701|GO:0035116|GO:0001958|GO:0006112|GO:0007565|GO:0046907|GO:0030168|GO:0045669|GO:0045672|GO:0040032|GO:0009791|GO:…	NP_536351	GNAS complex locus	3541.21	8123.61	11.866	12.9149
ASHG19A3A034174	-2.49502	-1.31905	2.49502	down	coding	NM_001033605	BBS9	RefSeq_coding	4004	chr7	+	33169151	33645680		GAAGTTATACACCATCAGAATTGGAAGGAAATGCTGTTGTTTCTTATTCCAGACCAACAG	27241	Hs.372360	GO:0003674|GO:0005515|GO:0045444|GO:0050896|GO:0007601|GO:0034464|GO:0005929|GO:0060170|GO:0005737|GO:0005856|GO:0005815|GO:0005730|GO:0005634|GO:0005886	NP_940820	Bardet-Biedl syndrome 9	73.8184	206.117	6.2837	7.60275
ASHG19A3A048110	-2.65711	-1.40986	2.65711	down	coding	NM_016237	ANAPC5	RefSeq_coding	2625	chr12	-	121746049	121790265		AATGGGGTTGTGCACGCCAATGTGTTCGGCATCAAGGACTGGGTGACGCCGTACAAGATC	51433	Hs.7101	GO:0005488|GO:0004842|GO:0000086|GO:0031145|GO:0031145|GO:0000075|GO:0051301|GO:0000090|GO:0000278|GO:0007094|GO:0051436|GO:0051437|GO:0070979|GO:0016567|GO:0051439|GO:0006511|GO:0005680|GO:0005829|GO:0005829|GO:0005654|GO:0005654	NP_057321	Anaphase promoting complex subunit 5	159.371	479.228	7.40098	8.81083
ASHG19A3A033725	-2.10919	-1.07669	2.10919	down	coding	NM_207336	ZNF467	RefSeq_coding	2295	chr7	-	149461452	149470295		GCCTCAACCAGGGCAGGAAAGAGTGGTTATTTATGTACTTAAAGTTTCATTAAAGTTAAA	168544	Hs.726477	GO:0003677|GO:0046872|GO:0008270|GO:0005622|GO:0005634	NP_997219	Zinc finger protein 467	9961.16	23365.3	13.3551	14.4318
ASHG19A3A015090	-3.27279	-1.71052	3.27279	down	coding	NM_004238	TRIP12	RefSeq_coding	6428	chr2	-	230631929	230786655		TTAAAATGCCAGTTACAAAGGCATCCAGACTGTGCAAATGTGAAGCAGTGGAAGGGTGGA	9320	Hs.591633	GO:0016881|GO:0005488|GO:0016874|GO:0046966|GO:0004842|GO:0004842|GO:0006464|GO:0016567|GO:0042787|GO:0005575|GO:0005622|GO:0000502	NP_004229	Thyroid hormone receptor interactor 12	125.312	464.203	7.05327	8.76379
ASHG19A3A020107	-2.01936	-1.0139	2.01936	down	coding	NM_013373	ZDHHC8	RefSeq_coding	3520	chr22	+	20119364	20133958		CATGACAGCGTCTGCTTGCGTTGTGTCTGTTTTATGTTTTTATATCTACATCTATATATC	29801	Hs.63128	GO:0008415|GO:0046872|GO:0016740|GO:0008270|GO:0031410|GO:0030659|GO:0016021|GO:0016020	NP_037505	Zinc finger, DHHC-type containing 8	3923.96	8768.44	12.0107	13.0246
ASHG19A3A040490	-2.40841	-1.26808	2.40841	down	coding	NM_173078	SLITRK4	RefSeq_coding	8720	chrX	-	142715944	142723019		GAACTGGAATAATCCTTTTGATTTGTGGCATTGTAACAACTCCGTGTAAAGATTATCTGA	139065	Hs.272284	GO:0007409|GO:0016021|GO:0016020	NP_775101	SLIT and NTRK-like family, member 4	3006.46	8042.24	11.6325	12.9005
ASHG19A3A008747	-2.01508	-1.01084	2.01508	down	coding	NM_080282	ABCA10	RefSeq_coding	6348	chr17	-	67144147	67240956	NR_002451,ENST00000504019,	TGAAGATGTTCAAGCTGAAAGAGTCCAAGCAGCAAATGCACTCACTGCTCCAAACTTGGA	10349	Hs.25377	GO:0005524|GO:0016887|GO:0000166|GO:0006810|GO:0016021|GO:0016020	NP_525021	ATP-binding cassette, sub-family A (ABC1), member 10	121.374	274.144	7.00571	8.01655
ASHG19A3A017402	-2.45437	-1.29535	2.45437	down	coding	NM_021220	OVOL2	RefSeq_coding	1555	chr20	-	18004795	18038521		CGGAAGGAGAGGTATTTCTTAGAGAGATCATCATTTTATGGTGCCTTGAAATAAAAATAC	58495	Hs.710157	GO:0003677|GO:0046872|GO:0010843|GO:0008270|GO:0001525|GO:0009953|GO:0048557|GO:0060214|GO:0007507|GO:0001947|GO:0060347|GO:0060716|GO:0045746|GO:0008285|GO:0045617|GO:0010944|GO:0045892|GO:0001755|GO:0001842|GO:0045893|GO:0051726|GO:0010837|GO:0010837|GO:0005622|GO:0005634|GO:0005634	NP_067043	Ovo-like 2 (Drosophila)	1094.79	3025.6	10.182	11.4773
ASHG19A3A015513	-2.58543	-1.37041	2.58543	down	coding	NM_002631	PGD	RefSeq_coding	1937	chr1	+	10459084	10480200		AATCACAGCCAATATTCTCAAGTTCCAAGACACCGATGGCAAACACCTGCTGCCAAAGAT	5226	Hs.464071	GO:0050661|GO:0016491|GO:0004616|GO:0004616|GO:0005515|GO:0005975|GO:0055114|GO:0019322|GO:0006098|GO:0006098|GO:0009051|GO:0005737|GO:0005829	NP_002622	Phosphogluconate dehydrogenase	2783.33	8014.83	11.5237	12.8941
ASHG19A3A006470	-2.2449	-1.16665	2.2449	down	coding	NM_177987	TUBB8	RefSeq_coding	1504	chr10	-	92827	95178	NM_020040,HIT000336671,ENST00000436895,ENST00000422534,ENST00000417736,	GTGCGGGAATCAGATCGGCGCCAAGTTCTGGGAGGTGATCTCTGATGAACATGCCATCGA	347688	Hs.532659	GO:0005525|GO:0003924|GO:0000166|GO:0005198|GO:0007018|GO:0051258|GO:0005737|GO:0005856|GO:0005874	NP_817124	Tubulin, beta 8	456.257	1158.66	8.92813	10.0948
ASHG19A3A051175	-2.24031	-1.1637	2.24031	down	coding	NM_015316	PPP1R13B	RefSeq_coding	4976	chr14	-	104200087	104313927		ATGTTGTAGAATTTTGCAAGGAACCTGGAGAAGGCAGCTGCCATTTAGCTGAAGTGTGGA	23368	Hs.709297	GO:0005515|GO:0006915|GO:0006917|GO:0045786|GO:0005737|GO:0005737|GO:0005730|GO:0005634|GO:0005886	NP_056131	Protein phosphatase 1, regulatory (inhibitor) subunit 13B	83.9943	209.689	6.46637	7.63007
ASHG19A3A009490	-2.24209	-1.16485	2.24209	down	coding	NM_001254	CDC6	RefSeq_coding	3053	chr17	+	38444145	38459413		TGGGAAGGACATGATGAGGAAATTGGAAAAACATATGACTGCAGAGAAGGGCCCCATGAT	990	Hs.405958	GO:0005524|GO:0003682|GO:0019900|GO:0017111|GO:0000166|GO:0005515|GO:0006260|GO:0000076|GO:0000082|GO:0000216|GO:0000084|GO:0000075|GO:0051301|GO:0007067|GO:0000278|GO:0008156|GO:0008285|GO:0071777|GO:0051984|GO:0000079|GO:0090007|GO:0000083|GO:0007089|GO:0005737|GO:0005829|GO:0005654|GO:0005654|GO:0005634|GO:0051233|GO:0000922	NP_001245	Cell division cycle 6 homolog (S. cerevisiae)	114.635	287.991	6.92017	8.08502
ASHG19A3A051774	-2.05338	-1.038	2.05338	down	coding	NM_016337	EVL	RefSeq_coding	1853	chr14	+	100531750	100610572		AAAGAAGAGGCAACCACGTTCTCCAATGCAATGCTGTTTGCCCTGAACATCATGAATTCC	51466	Hs.125867	GO:0017124|GO:0003779|GO:0005522|GO:0005515|GO:0007015|GO:0008154|GO:0007411|GO:0007166|GO:0007399|GO:0009887|GO:0005737|GO:0005856|GO:0005829|GO:0005925|GO:0030027	NP_057421	Enah/Vasp-like	571.301	1328.32	9.25072	10.2887
ASHG19A3A008628	-2.10906	-1.0766	2.10906	down	coding	NM_004687	MTMR4	RefSeq_coding	5847	chr17	-	56566892	56595251		ATCACACTGCTATAACTGTGACTGTGAATTCTGGTTGGCCAAACGAAGACACCATTGCAG	9110	Hs.514373		NP_004678	Myotubularin related protein 4	135.934	321.985	7.1679	8.2445
ASHG19A3A009006	-3.27492	-1.71146	3.27492	down	coding	NM_004703	RABEP1	RefSeq_coding	5421	chr17	+	5185557	5289131		AGTCTTCAGGAAATAAAGATCAGTTTGGAAGAGCAGTTAAAGAAAGAGACTGCTGCTAAG	9135	Hs.592121	GO:0005096|GO:0008083|GO:0005515|GO:0042803|GO:0006915|GO:0006944|GO:0006897|GO:0015031|GO:0005813|GO:0005737|GO:0016023|GO:0005769|GO:0055037	NP_004694	Rabaptin, RAB GTPase binding effector protein 1	602.432	2242.56	9.32539	11.0369
ASHG19A3A051090	-2.32103	-1.21476	2.32103	down	coding	NM_020414	DDX24	RefSeq_coding	2967	chr14	-	94517268	94547558		AATCTAAAACAGGAGTTGGATGACAAAAGCGCCACCTGTAAGGCATATCCAAAGCGTCCT	57062	Hs.510328	GO:0005524|GO:0004004|GO:0003723|GO:0003724|GO:0016787|GO:0000166|GO:0005515|GO:0016070|GO:0005737|GO:0005730	NP_065147	DEAD (Asp-Glu-Ala-Asp) box polypeptide 24	303.311	797.602	8.33753	9.5523
ASHG19A3A026170	-2.68756	-1.4263	2.68756	down	coding	NM_033393	FHDC1	RefSeq_coding	6480	chr4	+	153864134	153900848		AAATTGGCAGACACAAAAGCAAACAAACCTGGGATGAATCTCCTGCACTTTGTTGCACAG	85462	Hs.132629	GO:0003779|GO:0030036|GO:0016043	NP_203751	FH2 domain containing 1	84.5671	253.376	6.47718	7.90348
ASHG19A3A035160	-2.08974	-1.06332	2.08974	down	coding	NM_016019	LUC7L2	RefSeq_coding	2725	chr7	+	139044633	139108198		AAATTGTTAGCCAAGGTGGAACAACTAGGAGCTGAAGGGAATGTGGAGGAATCCCAGAAA	51631	Hs.728191	GO:0019899|GO:0046872|GO:0005515	NP_057103	LUC7-like 2 (S. cerevisiae)	278.242	658.231	8.20702	9.27034
ASHG19A3A025233	-2.18285	-1.12622	2.18285	down	coding	NM_005980	S100P	RefSeq_coding	510	chr4	+	6695565	6698896		AATTATTCCCCTAGGCTGAGCCTGCTCATGTACCTCTGATTAATAAATGCTTATGAAATG	6286	Hs.2962	GO:0005509|GO:0048306|GO:0000287|GO:0005515|GO:0043542|GO:0005737|GO:0005737|GO:0005634	NP_005971	S100 calcium binding protein P	30913.8	70800.6	14.9685	16.0947
ASHG19A3A030314	-2.40772	-1.26767	2.40772	down	coding	NM_006828	ASCC3	RefSeq_coding	7598	chr6	-	100956608	101329224		AGGCTTTCCAGGTCAACATTACTGTCCTCGTATGGCTAGTATGAACAAGCCTGCATTTCA	10973	Hs.486031	GO:0005524|GO:0008026|GO:0004386|GO:0016787|GO:0003676|GO:0000166|GO:0005737|GO:0005622|GO:0015630	NP_071374	Activating signal cointegrator 1 complex subunit 3	109.336	294.971	6.85112	8.11879
ASHG19A3A024269	-31.2389	-4.96527	31.2389	down	coding	NM_001077	UGT2B17	RefSeq_coding	2099	chr4	-	69402904	69434245	NM_001076,	AGAAGCCAAATACTTTAGGTTCCAATACTCGACTGTATAAGTGGTTACCCCAGAATGACC	7367	Hs.575083	GO:0015020|GO:0001972|GO:0008152|GO:0008202|GO:0005783|GO:0005789|GO:0016021|GO:0016020|GO:0005624|GO:0005792	NP_001068	UDP glucuronosyltransferase 2 family, polypeptide B17	181.468	6379.76	7.58767	12.5529
ASHG19A3A021473	-2.49757	-1.32053	2.49757	down	coding	NM_199420	POLQ	RefSeq_coding	8787	chr3	-	121150273	121264853		TTAAACACTGGAGCTGATGTTTTCAGGAGCATTGCAGCAGAGTGGAAGATGATTGAGCCA	10721	Hs.241517	GO:0005524|GO:0008026|GO:0003887|GO:0003684|GO:0004386|GO:0000166|GO:0016779|GO:0016740|GO:0006281|GO:0006260|GO:0005654	NP_955452	Polymerase (DNA directed), theta	164.542	464.532	7.44451	8.76504
ASHG19A3A010792	-2.1231	-1.08617	2.1231	down	coding	NM_001136263	C2CD4C	RefSeq_coding	3124	chr19	-	405443	409170		CTCCCCAGCTGTGTTTGTTTATAAATGCTGTTTATAGTGCAATAAAGGTGTTTCGGGAAT	126567	Hs.223770		NP_001129735	C2 calcium-dependent domain containing 4C	448.842	1080.73	8.90805	9.99423
ASHG19A3A009840	-2.19313	-1.13299	2.19313	down	coding	NM_000727	CACNG1	RefSeq_coding	1266	chr17	+	65040705	65052909		CCTGGGAAGCATTTTTAACTGGGTAGAATCTGACTGTGGCTTGAAATAAAAAGCTCTCAG	786	Hs.147989	GO:0005245|GO:0005244|GO:0006811|GO:0006936|GO:0051925|GO:0006810|GO:0016021|GO:0016020|GO:0005891	NP_000718	Calcium channel, voltage-dependent, gamma subunit 1	125.375	309.145	7.05395	8.18694
ASHG19A3A023643	-2.54158	-1.34573	2.54158	down	coding	NM_002808	PSMD2	RefSeq_coding	2990	chr3	+	184017021	184026840		GCTTTTGGCCAAGACAAGCTGCTAACAGATGATGGCAACAAATGGCTTTACAAGAACAAG	5708	Hs.518464	GO:0030234|GO:0005515|GO:0006977|GO:0000082|GO:0000216|GO:0016070|GO:0000084|GO:0031145|GO:0031145|GO:0006915|GO:0000075|GO:0034641|GO:0016071|GO:0000278|GO:0051436|GO:0051437|GO:0042981|GO:0006521|GO:0042176|GO:0051439|GO:0016032|GO:0000502|GO:0005838	NP_002799	Proteasome (prosome, macropain) 26S subunit, non-ATPase, 2	285.741	819.768	8.24489	9.59062
ASHG19A3A018511	-2.15717	-1.10914	2.15717	down	coding	NM_198976	TH1L	RefSeq_coding	2263	chr20	+	57556310	57570186		ATTTTCAGGCAGGAGGGTCTCCAGAGAATGTTATCCAGCTCTTATCTGAAAACTACACCG	51497	Hs.517148	GO:0005515|GO:0010467|GO:0050434|GO:0006368|GO:0006366|GO:0016032|GO:0005654|GO:0005654|GO:0005634	NP_945327	TH1-like (Drosophila)	348.006	850.217	8.53333	9.64247
ASHG19A3A011541	-2.12422	-1.08693	2.12422	down	coding	NM_019108	C19orf61	RefSeq_coding	2371	chr19	-	44235300	44259142		AACCAGACCAGTGGCATCGACTTCTTTATTACCCAAGAACGGATTGTTTTCCTGGACACA	56006	Hs.466875	GO:0005515|GO:0000184|GO:0005622	NP_061981	Chromosome 19 open reading frame 61	95.7611	226.839	6.6537	7.74064
ASHG19A3A010061	-2.23336	-1.15922	2.23336	down	coding	NM_199287	CCDC137	RefSeq_coding	2109	chr17	+	79633760	79640934		ACCCAAGGTTTGGTTGGGGTGAAACATGATGACAACACATACACTTAAGAAGGTGGGAAC	339230	Hs.405942		NP_954981	Coiled-coil domain containing 137	306.97	776.351	8.35426	9.51348
ASHG19A3A003991	-2.56345	-1.35808	2.56345	down	coding	NM_031370	HNRNPD	RefSeq_coding	2257	chr4	-	83274466	83295149	NM_002138,	TGAAGCAGCGACGGCACAGCGGGAAGAATGGAAAATGTTTATAGGAGGCCTTAGCTGGGA	3184	Hs.480073	GO:0003677|GO:0003723|GO:0003723|GO:0000166|GO:0005515|GO:0042162|GO:0016563|GO:0006401|GO:0016070|GO:0006396|GO:0008380|GO:0010467|GO:0016071|GO:0048255|GO:0000398|GO:0006355|GO:0005737|GO:0005829|GO:0030530|GO:0005730|GO:0005654|GO:0005634|GO:0005634|GO:0030529	NP_112738	Heterogeneous nuclear ribonucleoprotein D (AU-rich element RNA binding protein 1, 37kDa)	941.204	2714.18	9.96071	11.3188
ASHG19A3A005483	-2.51837	-1.33249	2.51837	down	coding	NM_031935	HMCN1	RefSeq_coding	18212	chr1	+	185703682	186160085		ACACACAATGGAAAGACATGCCAAGATATCGATGAATGTCTGGAGCAGAATGTGCACTGT	83872	Hs.58877	GO:0005509|GO:0008218|GO:0018298|GO:0050896|GO:0007601|GO:0005604|GO:0005938|GO:0030054|GO:0005576	NP_114141	Hemicentin 1	447.741	1282.77	8.90525	10.2377
ASHG19A3A037975	-2.44234	-1.28827	2.44234	down	coding	NM_001080497	MEGF9	RefSeq_coding	6297	chr9	-	123363090	123476612		ATTATGGCTTTAGTAAGAATGGCTGCTTGCCCTGCCAATGCAATAATCGGTCTGCCAGTT	1955	Hs.726061	GO:0005488|GO:0005509|GO:0004872|GO:0008150|GO:0005575|GO:0016021|GO:0016020	NP_001073966	Multiple EGF-like-domains 9	280.018	772.767	8.2168	9.50506
ASHG19A3A037681	-4.57928	-2.19512	4.57928	down	coding	NM_017594	DIRAS2	RefSeq_coding	4107	chr9	-	93372113	93405108		CCAGTGATGTTCTGGAAATAATGGGAGATATTACAATAAAGCTACAGTTATGACACCCTG	54769	Hs.165636	GO:0005525|GO:0003924|GO:0000166|GO:0007165|GO:0007264|GO:0005622|GO:0005886	NP_060064	DIRAS family, GTP-binding RAS-like 2	857.857	4396.55	9.83309	12.0282
ASHG19A3A029853	-2.34167	-1.22754	2.34167	down	coding	NM_006099	PIAS3	RefSeq_coding	2902	chr1	+	145575987	145586546		TTGTGATGAGATCCAATTCATGGAAGATGGATCCTGGTGCCCAATGAAACCCAAGAAGGA	10401	Hs.435761	GO:0019789|GO:0019899|GO:0046872|GO:0003676|GO:0015459|GO:0008022|GO:0047485|GO:0005515|GO:0008270|GO:0010628|GO:0045838|GO:0033235|GO:0016925|GO:0009725|GO:0030425|GO:0016607|GO:0005634|GO:0045202	NP_006090	Protein inhibitor of activated STAT, 3	79.4942	208.161	6.39041	7.61795
ASHG19A3A021160	-2.29498	-1.19848	2.29498	down	coding	NM_018403	DCP1A	RefSeq_coding	6025	chr3	-	53317446	53381654		TTTGGAACCTCTTTGCCAAAGGAACAACCAGCAGTTGTGGGTCTGGATTCAGAAGAAATG	55802	Hs.476353	GO:0016787|GO:0005515|GO:0016070|GO:0043928|GO:0016071|GO:0000288|GO:0000184|GO:0005737|GO:0000932|GO:0005829|GO:0043231|GO:0005634	NP_060873	DCP1 decapping enzyme homolog A (S. cerevisiae)	73.599	188.936	6.27872	7.47721
ASHG19A3A045697	-2.07066	-1.05009	2.07066	down	coding	NM_001009881	ZCCHC11	RefSeq_coding	5845	chr1	-	52888947	53018743		TGCATCAAAACTTCATGCATCAGGGAAATGCCCGATTCCAGCCCAACAAACCTTTCTATA	23318	Hs.655407	GO:0050265|GO:0046872|GO:0003676|GO:0016779|GO:0005515|GO:0016740|GO:0008270|GO:0031123|GO:0001816|GO:0031047|GO:0071044|GO:0010587|GO:0010586|GO:0032088|GO:0031054|GO:0031664|GO:0019827|GO:0005737|GO:0005730|GO:0005634	NP_056084	Zinc finger, CCHC domain containing 11	261.958	615.675	8.11887	9.16896
ASHG19A3A027458	-2.02791	-1.02	2.02791	down	coding	NM_004134	HSPA9	RefSeq_coding	3506	chr5	-	137891024	137911115		TTATGCTACCAAGCGTCTCATTGGCCGGCGATATGATGATCCTGAAGTACAGAAAGACAT	3313	Hs.184233	GO:0005524|GO:0019899|GO:0000166|GO:0005515|GO:0051082|GO:0006916|GO:0006611|GO:0006457|GO:0009986|GO:0005737|GO:0042645|GO:0005739|GO:0005739	NP_004125	Heat shock 70kDa protein 9 (mortalin)	1259.01	2895.16	10.3853	11.4053
ASHG19A3A016553	-2.06509	-1.0462	2.06509	down	coding	NM_203463	LASS6	RefSeq_coding	6259	chr2	+	169312834	169631152		TGGACCACAAATTGCTCCGCCCAATGCCATTCTGGAAAAGGTCTTCACTGCAATTACAAA	253782	Hs.724377	GO:0043565|GO:0003700|GO:0050291|GO:0008610|GO:0006355|GO:0006665|GO:0005783|GO:0005789|GO:0016021|GO:0016020|GO:0031965|GO:0005634	NP_982288	LAG1 homolog, ceramide synthase 6	216.008	506.335	7.83994	8.88614
ASHG19A3A021054	-2.7613	-1.46535	2.7613	down	coding	NM_005051	QARS	RefSeq_coding	2437	chr3	-	49133365	49142171		TTACAAAGTCACATATGCGTCTGACTATTTTGACCAGCTATATGCGTGGGCTGTGGAGCT	5859	Hs.79322	GO:0005524|GO:0004819|GO:0016874|GO:0000166|GO:0005515|GO:0010467|GO:0006425|GO:0006418|GO:0005737|GO:0005829|GO:0005759	NP_005042	Glutaminyl-tRNA synthetase	151.97	474.806	7.3318	8.79714
ASHG19A3A048678	-2.28298	-1.19092	2.28298	down	coding	NM_058173	MUCL1	RefSeq_coding	500	chr12	+	55248298	55252172		TGAAGCATTTTTGTCTGTGCTCCCTGATCTTCAGGTCACCACCATGAAGTTCTTAGCAGT	118430	Hs.348419	GO:0005576|GO:0016020	NP_477521	Mucin-like 1	320.794	828.127	8.41418	9.60511
ASHG19A3A014533	-2.28953	-1.19505	2.28953	down	coding	NM_013450	BAZ2B	RefSeq_coding	8145	chr2	-	160175491	160473059		AAATTGTGCAAGGAGCATGATGGAGAATTTACTGGCGAAGACGAAAGCAGTGCACATGCA	29994	Hs.470369	GO:0003677|GO:0046872|GO:0005515|GO:0030528|GO:0008270|GO:0006355|GO:0005634	NP_038478	Bromodomain adjacent to zinc finger domain, 2B	122.457	315.776	7.02025	8.2153
ASHG19A3A051889	-3.5893	-1.8437	3.5893	down	coding	NM_207355	POTEB	RefSeq_coding	2132	chr15	-	21040700	21071977	NM_174981,NM_001137671,	GAAGTAGTACAACTCCTGCTGGACAGACGATGTCAACTTAACGTCCTTGACAACAAAAAA	339010	Hs.442712		NP_997238	POTE ankyrin domain family, member B	92.7211	372.285	6.60654	8.45024
ASHG19A3A002200	-2.07369	-1.0522	2.07369	down	coding	NM_001130847	AIFM1	RefSeq_coding	2418	chrX	-	129263339	129299808		AACTGGCCTGTGCTCTTGGCAGAAAGGATATATGAAATCAGGGCATCTTTTCAGGAGGAT	9131	Hs.424932	GO:0003677|GO:0009055|GO:0050660|GO:0016491|GO:0005515|GO:0008630|GO:0006309|GO:0006919|GO:0070059|GO:0045454|GO:0055114|GO:0005737|GO:0005829|GO:0016020|GO:0005743|GO:0005758|GO:0005739|GO:0005634|GO:0048471	NP_665812	Apoptosis-inducing factor, mitochondrion-associated, 1	163.07	380.766	7.43197	8.48417
ASHG19A3A019401	-2.09933	-1.06993	2.09933	down	coding	NM_006559	KHDRBS1	RefSeq_coding	2685	chr1	+	32479490	32509471		TCAAAAGACTGCAGGAAGAGACTGGTGCAAAGATCTCTGTATTGGGAAAGGGCTCAATGA	10657	Hs.445893	GO:0003677|GO:0003723|GO:0017124|GO:0005070|GO:0005515|GO:0016564|GO:0000086|GO:0007049|GO:0007050|GO:0008283|GO:0007166|GO:0006397|GO:0046831|GO:0007165|GO:0016020|GO:0005634	NP_006550	KH domain containing, RNA binding, signal transduction associated 1	510.298	1212.58	9.09068	10.1606
ASHG19A3A010083	-2.98539	-1.57792	2.98539	down	coding	NM_207459	TEX19	RefSeq_coding	1903	chr17	+	80317123	80321619		CTGGTTTTAAATGTTGGCCGTTGATGCAATTTAACCATTTAATTCCTGTTGCTCTATATG	400629	Hs.231897	GO:0005634	NP_997342	Testis expressed 19	211.354	712.8	7.80957	9.38749
ASHG19A3A028682	-2.45169	-1.29378	2.45169	down	coding	NM_005509	DMXL1	RefSeq_coding	11173	chr5	+	118407083	118584822		AGTTTGTCTGCAGGTCCTGCAATTCTTCGCCACAAAGCTTTACTGGAACCTACAAACACT	1657	Hs.181042		NP_005500	Dmx-like 1	93.5961	255.256	6.62086	7.91464
ASHG19A3A003737	-2.07461	-1.05284	2.07461	down	coding	NM_001174068	SYTL4	RefSeq_coding	3767	chrX	-	99929490	99986522		TCTGGCGTTGGCCAGTCAGCCACAGGCAACTCTGGTAGCTCTCCTTGTCTGGTTGTTTTG	94121	Hs.592224	GO:0017137|GO:0046872|GO:0042043|GO:0005543|GO:0005215|GO:0008270|GO:0006887|GO:0006886|GO:0046676|GO:0031410|GO:0019898|GO:0005886|GO:0030141|GO:0008021|GO:0030658	NP_542775	Synaptotagmin-like 4	274.717	644.74	8.18714	9.23998
ASHG19A3A001421	-3.26317	-1.70628	3.26317	down	coding	NM_001042467	MLPH	RefSeq_coding	3687	chr2	+	238395877	238463960		AGGCCGGGCGTCTTCTGAGAGTCAGGGTCTAGGTGCTGGAGTGCGCACGGAGGCCGATGT	79083	Hs.102406	GO:0017137|GO:0003779|GO:0046872|GO:0051010|GO:0031489|GO:0008270|GO:0030318|GO:0032400|GO:0043473|GO:0006605|GO:0015629|GO:0005737	NP_077006	Melanophilin	856.188	3145.23	9.83009	11.5364
ASHG19A3A054229	-3.03211	-1.60032	3.03211	down	coding	NM_153028	ZNF75A	RefSeq_coding	2141	chr16	+	3355432	3368574		ACAGATTCTAGCTTTTCCTGAGCAAACAAACACCAAAGACTGGACAGTGACACCTGAGCA	7627	Hs.513292	GO:0003677|GO:0046872|GO:0003674|GO:0008270|GO:0008150|GO:0006355|GO:0005622|GO:0005634	NP_694573	Zinc finger protein 75a	136.152	466.262	7.17052	8.77085
ASHG19A3A001781	-2.48996	-1.31612	2.48996	down	coding	NM_001100424	SPATS2L	RefSeq_coding	6128	chr2	+	201170984	201346982		TCAAAGGCACTTCGTGGGGTCACAGGCCCAAATATTGAGAAATCAGTGAAGGATTTGCAA	26010	Hs.120323		NP_056350	Spermatogenesis associated, serine-rich 2-like	251.955	707.504	8.06105	9.37717
ASHG19A3A044938	-2.06065	-1.0431	2.06065	down	coding	NM_001418	EIF4G2	RefSeq_coding	3911	chr11	-	10818593	10830582	NM_001172705,	AGGACAGTCGAAGGATATGCCACCTCGGTTTTCTAAGAAAGGACAGCTTAATGCAGATGA	1982	Hs.183684	GO:0005515|GO:0008135|GO:0003743|GO:0016070|GO:0007050|GO:0008219|GO:0006446|GO:0006412|GO:0006412|GO:0006413|GO:0016281	NP_001409	Eukaryotic translation initiation factor 4 gamma, 2	1581.59	3639.15	10.7118	11.7549
ASHG19A3A052974	-4.46391	-2.15831	4.46391	down	coding	NM_024798	SNX22	RefSeq_coding	3614	chr15	+	64443915	64449680		CTGGAGAGTCAAAGCCTCTTAACAAGGAATGAACAGGAATAAAAGACAGCTGTGAGTGTG	79856	Hs.708268	GO:0035091|GO:0007154|GO:0015031|GO:0030659	NP_079074	Sorting nexin 22	82.6079	414.79	6.44229	8.6006
ASHG19A3A033239	-2.20006	-1.13754	2.20006	down	coding	NM_001185	AZGP1	RefSeq_coding	1278	chr7	-	99564351	99573735		ATTTGGAGACCGAAGACTGGGATGCCTGTCTTGAGTAGACTTGGACCCAAAAAATCATCT	563	Hs.546239	GO:0005504|GO:0008320|GO:0004540|GO:0019882|GO:0007155|GO:0007155|GO:0006955|GO:0016042|GO:0008285|GO:0042612|GO:0005576|GO:0016020	NP_001176	Alpha-2-glycoprotein 1, zinc-binding	310.509	773.68	8.36972	9.50726
ASHG19A3A006889	-2.32316	-1.21609	2.32316	down	coding	NM_199443	USP4	RefSeq_coding	3979	chr3	-	49314576	49377536		GGCCCAGGCAGACCTTGCAGTCAAATGGATCTGGCTTTTCTGCTTCGTATAATTGTCAGG	7375	Hs.77500	GO:0031685|GO:0008234|GO:0008233|GO:0005515|GO:0004221|GO:0004843|GO:0031397|GO:0016579|GO:0034394|GO:0031647|GO:0006511|GO:0005737|GO:0005764|GO:0005634	NP_955475	Ubiquitin specific peptidase 4 (proto-oncogene)	113.878	296.322	6.9103	8.12639
ASHG19A3A046025	-2.31354	-1.2101	2.31354	down	coding	NM_001033	RRM1	RefSeq_coding	3234	chr11	+	4115923	4160105		ATCCTGGCAGCCAGGATCGCTGTCTCTAACTTGCACAAAGAAACAAAGAAAGTGTTCAGT	6240	Hs.445705	GO:0005524|GO:0016491|GO:0017076|GO:0004748|GO:0004748|GO:0006260|GO:0009263|GO:0015949|GO:0055086|GO:0055114|GO:0051290|GO:0051259|GO:0005737|GO:0005829|GO:0005654|GO:0005971	NP_001024	Ribonucleotide reductase M1	247.482	647.457	8.03499	9.24509
ASHG19A3A029383	-3.03317	-1.60083	3.03317	down	coding	NM_030810	TXNDC5	RefSeq_coding	2970	chr6	-	7881753	7911041		TACACGGCCGACATGTTCACGCACGGGATCCAGAGCGCCGCGCACTTCGTCATGTTCTTC	81567	Hs.150837	GO:0009055|GO:0016853|GO:0015035|GO:0006916|GO:0045454|GO:0016044|GO:0006662|GO:0006892|GO:0005783|GO:0005788|GO:0043202	NP_110437	Thioredoxin domain containing 5 (endoplasmic reticulum)	75.4888	255.858	6.31689	7.91772
ASHG19A3A047538	-2.39783	-1.26173	2.39783	down	coding	NM_017822	C12orf41	RefSeq_coding	2402	chr12	-	49046994	49076035		AAAGAACGAGAGAACTTAAAGCGATTAAAATGTCTGCGACGATACCGCCAGCGCTATGGA	54934	Hs.505412		NP_060292	Chromosome 12 open reading frame 41	319.639	868.072	8.40937	9.6711
ASHG19A3A020434	-2.13038	-1.09111	2.13038	down	coding	NM_016091	EIF3L	RefSeq_coding	1970	chr22	+	38245369	38284637		TGTCCTTCATTCCCTGGTAGACAAATCCAACATCAACCGACAGTTGGAGGTATACACAAG	51386	Hs.446852	GO:0005515|GO:0003743|GO:0003743|GO:0006413|GO:0006413|GO:0005737|GO:0005852|GO:0001650|GO:0005730|GO:0005654	NP_057175	Eukaryotic translation initiation factor 3, subunit L	2852.46	6810.8	11.5606	12.6518
ASHG19A3A008613	-2.08131	-1.0575	2.08131	down	coding	NM_017949	CUEDC1	RefSeq_coding	2193	chr17	-	55940336	55980750		AATACGAATCCCAGAAATCTAAATCCAGCAGCGTGGCTGTCGGAAACGACTTTGGCTTTT	404093	Hs.46679		NP_060419	CUE domain containing 1	103.996	242.176	6.77761	7.83511
ASHG19A3A006826	-3.64128	-1.86445	3.64128	down	coding	NM_198902	TSPAN3	RefSeq_coding	3796	chr15	-	77336361	77363570		GGAAAGTCGCTGTGGACTTGCCACGGTGGAAAATGAGGTTGATCGCAGCATTCAGAAAGT	10099	Hs.728882	GO:0016021|GO:0016020	NP_944492	Tetraspanin 3	68.6188	280.058	6.18019	8.04464
ASHG19A3A018777	-2.24937	-1.16952	2.24937	down	coding	NM_003253	TIAM1	RefSeq_coding	7218	chr21	-	32490735	32931290		AAATCTCGAGCAGTTCCAAATGGACCTGTTTCGTTTCCGCTGTTATTTAGCCAGCCTTCA	7074	Hs.517228	GO:0005089|GO:0046875|GO:0005085|GO:0005543|GO:0005057|GO:0006915|GO:0048013|GO:0008624|GO:0048011|GO:0050772|GO:0035023|GO:0051056|GO:0007264|GO:0005911|GO:0005829|GO:0005829|GO:0005622|GO:0005886	NP_003244	T-cell lymphoma invasion and metastasis 1	107.237	269.562	6.82333	7.99285
ASHG19A3A041405	-2.1312	-1.09167	2.1312	down	coding	NM_021205	RHOU	RefSeq_coding	4369	chr1	+	228870868	228882409		CCAAGTTGTGCTTTTCTGTTTTCAAGTGTAAATGATGTTGAGCAGAATGTTGTACTTGAA	58480	Hs.647774	GO:0005525|GO:0003924|GO:0046872|GO:0000166|GO:0005515|GO:0000082|GO:0016601|GO:0030036|GO:0008360|GO:0051056|GO:0007264|GO:0005794|GO:0000139|GO:0030054|GO:0042995|GO:0005829|GO:0005925|GO:0005622|GO:0005886|GO:0002102	NP_067028	Ras homolog gene family, member U	4577.96	10815.5	12.2383	13.33
ASHG19A3A040174	-6.50869	-2.70237	6.50869	down	coding	NM_001129896	SYTL4	RefSeq_coding	3888	chrX	-	99929490	99987135		CTCCCTTGAAACCGGCACTGGGACTTCTCGATCTCTGGAGGCACCTGTTGCAAGTGACAG	94121	Hs.592224	GO:0017137|GO:0046872|GO:0042043|GO:0005543|GO:0005215|GO:0008270|GO:0006887|GO:0006886|GO:0046676|GO:0031410|GO:0019898|GO:0005886|GO:0030141|GO:0008021|GO:0030658	NP_542775	Synaptotagmin-like 4	483.121	3536.79	9.01211	11.7145
ASHG19A3A046267	-2.43388	-1.28326	2.43388	down	coding	NM_005898	CAPRIN1	RefSeq_coding	5562	chr11	+	34073229	34124157		GGCTCATCTTCATACCTTTTTCCATTTTGAATCCTACAAAAATACTGCAAAAGACTAGTG	4076	Hs.471818	GO:0003723|GO:0005515|GO:0030154|GO:0017148|GO:0050775|GO:0061003|GO:0042995|GO:0005737|GO:0000932|GO:0005829|GO:0030425|GO:0005887|GO:0010494	NP_976240	Cell cycle associated protein 1	376.88	1036.93	8.65117	9.93442
ASHG19A3A009760	-2.02858	-1.02047	2.02858	down	coding	NM_003488	AKAP1	RefSeq_coding	3968	chr17	+	55162552	55198709		AACAGCATGGATTCCGTGGATAGCTGTTGCAGTCTCAAGAAGACTGAGAGCTTCCAAAAT	8165	Hs.463506	GO:0003723|GO:0048487|GO:0008017|GO:0005515|GO:0032947|GO:0019904|GO:0034237|GO:0019901|GO:0030346|GO:0007596|GO:0070887|GO:0032869|GO:0051534|GO:0010614|GO:0035308|GO:0005829|GO:0016021|GO:0005811|GO:0030061|GO:0005759|GO:0005741|GO:0005739|GO:0031594|GO:0045211	NP_003479	A kinase (PRKA) anchor protein 1	147.052	335.894	7.28313	8.3036
ASHG19A3A040477	-2.1196	-1.08379	2.1196	down	coding	NM_005634	SOX3	RefSeq_coding	2074	chrX	-	139585151	139587225		GGAGGGGCTACTTTGTTTCAGGGTTTTCAAGCTTTTACTCTTAATTCCTAAATGAGATCA	6658	Hs.157429	GO:0003677|GO:0007417|GO:0030900|GO:0009887|GO:0048515|GO:0005634	NP_005625	SRY (sex determining region Y)-box 3	11956.8	27717.3	13.6127	14.6965
ASHG19A3A019642	-2.04587	-1.03271	2.04587	down	coding	NM_002430	MN1	RefSeq_coding	7569	chr22	-	28144265	28197486		GCAGTCTTCTGTATTCCTGCATATTGTATATACCTGTATATGTTTTCCTGAGCAGTTAAA	4330	Hs.268515	GO:0005488|GO:0003674|GO:0008150|GO:0001957|GO:0005575	NP_002421	Meningioma (disrupted in balanced translocation) 1	234.381	542.536	7.95569	8.9884
ASHG19A3A009927	-2.22908	-1.15645	2.22908	down	coding	NM_024844	NUP85	RefSeq_coding	2311	chr17	+	73201596	73231854		TTGTCAGCAATGGAGCTCATCTGGAACCTGTGTGAGATTCTTTTTATTGAAGTGGCCCCA	79902	Hs.362817	GO:0005515|GO:0000087|GO:0005975|GO:0006935|GO:0015758|GO:0008645|GO:0030032|GO:0051028|GO:0048246|GO:0000278|GO:0000236|GO:0015031|GO:0010827|GO:0055085|GO:0016032|GO:0031080|GO:0031080|GO:0000777|GO:0005737|GO:0005856|GO:0005829|GO:0000776|GO:0016020|GO:0005635|GO:0005635|GO:0031965|GO:0005634|GO:0005819	NP_079120	Nucleoporin 85kDa	223.46	564.419	7.88609	9.04255
ASHG19A3A046136	-4.46149	-2.15753	4.46149	down	coding	NM_001124	ADM	RefSeq_coding	1449	chr11	+	10326641	10328923		AGGAAACACCGAGTCTCTGTATAATCTATTTACATAAAATGGGTGATATGCGAACAGCAA	133	Hs.441047	GO:0031700|GO:0005179|GO:0005102|GO:0007568|GO:0008209|GO:0008015|GO:0060670|GO:0006171|GO:0019933|GO:0055074|GO:0007267|GO:0048589|GO:0007204|GO:0007565|GO:0007507|GO:0046879|GO:0008285|GO:0045906|GO:0001843|GO:0031102|GO:0042475|GO:0031100|GO:0045768|GO:0008284|GO:0010460|GO:0045909|GO:0006701|GO:0002026|GO:0009409|GO:0051384|GO:0001666|GO:0032868|GO:0032496|GO:0010033|GO:0042594|GO:0009611|GO:…	NP_001115	Adrenomedullin	380.664	1921.52	8.66365	10.8212
ASHG19A3A001461	-4.84436	-2.27631	4.84436	down	coding	NM_001044392	MUC1	RefSeq_coding	873	chr1	-	155158301	155162700	NM_001044391,	GCTGCAGAGAGACATTTCTGAAATGGCTGTCTGTCAGTGCCGCCGAAAGAACTACGGGCA	4582	Hs.89603	GO:0005515|GO:0016324|GO:0005737|GO:0005576|GO:0005887|GO:0005634|GO:0005886	NP_002447	Mucin 1, cell surface associated	785.971	4260.04	9.70707	11.9834
ASHG19A3A038415	-2.40303	-1.26486	2.40303	down	coding	NM_002393	MDM4	RefSeq_coding	10073	chr1	+	204485510	204527247		CAGACTCTCGCTCTCGCACAGGATCACAGTATGGATATTCCAAGTCAAGACCAACTGAAG	4194	Hs.497492	GO:0019899|GO:0046872|GO:0005515|GO:0008270|GO:0045023|GO:0006915|GO:0008283|GO:0043066|GO:0071157|GO:0008285|GO:0042177|GO:0000122|GO:0006461|GO:0050821|GO:0005622|GO:0005634	NP_002384	Mdm4 p53 binding protein homolog (mouse)	91.4424	244.948	6.58502	7.84987
ASHG19A3A020207	-2.04973	-1.03543	2.04973	down	coding	NM_005940	MMP11	RefSeq_coding	2276	chr22	+	24115035	24126502		CTATCCTCCAAAGCCATTGTAAATGTGTGTACAGTGTGTATAAACCTTCTTCTTCTTTTT	4320	Hs.143751	GO:0005509|GO:0004222|GO:0008233|GO:0008270|GO:0030574|GO:0007275|GO:0006508|GO:0005576|GO:0005578	NP_005931	Matrix metallopeptidase 11 (stromelysin 3)	185.075	428.801	7.61557	8.65101
ASHG19A3A016011	-2.5259	-1.3368	2.5259	down	coding	NM_015341	NCAPH	RefSeq_coding	4495	chr2	+	97001483	97041274		AAGACTGCCAAAAAGATGGACATGAAGAAACTGAAGCAGAGCATGTGGAGTCTGCTGACA	23397	Hs.308045	GO:0007049|GO:0051301|GO:0007067|GO:0007076|GO:0005694|GO:0000796|GO:0005737|GO:0015630|GO:0005634	NP_056156	Non-SMC condensin I complex, subunit H	579.957	1660.38	9.27218	10.609
ASHG19A3A042557	-2.46262	-1.30019	2.46262	down	coding	NM_173496	MPP7	RefSeq_coding	5207	chr10	-	28339922	28571067		TTCTTCAGATTATGAGCCAAGATGATGCAACTTGGTGGCAAGCGAAACACGAAGCTGATG	143098	Hs.499159	GO:0005515|GO:0032947|GO:0019904|GO:0046982|GO:0035591|GO:0035591|GO:0030010|GO:0031334|GO:0031334|GO:0071896|GO:0070830|GO:0005912|GO:0030054|GO:0016020|GO:0043234|GO:0005923	NP_775767	Membrane protein, palmitoylated 7 (MAGUK p55 subfamily member 7)	254.925	708.595	8.07854	9.37873
ASHG19A3A031438	-2.34753	-1.23115	2.34753	down	coding	NM_003017	SFRS3	RefSeq_coding	3144	chr6	+	36562089	36572243		GGATCAAGGTGTTCACTAGAAGTCACTGTTACTAATACTTGATGACAATGTAAAGAAACA	6428	Hs.405144	GO:0003723|GO:0000166|GO:0005515|GO:0008380|GO:0010467|GO:0031124|GO:0006406|GO:0000398|GO:0006369|GO:0006366|GO:0005654|GO:0005634	NP_003008	Serine/arginine-rich splicing factor 3	151.85	402.286	7.3308	8.56195
ASHG19A3A046793	-2.12163	-1.08518	2.12163	down	coding	NM_003251	THRSP	RefSeq_coding	1207	chr11	+	77774906	77779396		CGACCACTGATGAGATCAACAACAGGTGAACTATAAACCTATTATTTATTGCAGAACTAA	7069	Hs.591969	GO:0005515|GO:0006629|GO:0046890|GO:0005737|GO:0005829|GO:0005634	NP_003242	Thyroid hormone responsive	89.1133	210.139	6.54812	7.63329
ASHG19A3A037154	-2.15564	-1.10812	2.15564	down	coding	NM_001122	PLIN2	RefSeq_coding	2010	chr9	-	19115759	19127573		ATGGGTAGAGTGGAAAAGGAGCATTGGATATGATGATACTGATGAGTCCCACTGTGCTGA	123	Hs.3416	GO:0044255|GO:0019915|GO:0015909|GO:0042493|GO:0014070|GO:0005737|GO:0005783|GO:0005576|GO:0005811|GO:0005634|GO:0005886	NP_001113	Perilipin 2	345.055	843.638	8.52149	9.6296
ASHG19A3A035742	-2.77389	-1.47191	2.77389	down	coding	NM_003101	SOAT1	RefSeq_coding	3407	chr1	+	179263016	179324452		TTTTTTGCCTTTTTGCACTGCTGGCTCAATGCCTTTGCTGAGATGTTACGCTTTGGTGAC	6646	Hs.496383	GO:0034736|GO:0034736|GO:0015485|GO:0000062|GO:0004607|GO:0004772|GO:0004772|GO:0016740|GO:0033344|GO:0034435|GO:0034435|GO:0042632|GO:0008203|GO:0008203|GO:0010878|GO:0010742|GO:0010742|GO:0010742|GO:0042986|GO:0008202|GO:0034379|GO:0005783|GO:0005789|GO:0016021|GO:0016020|GO:0005792	NP_003092	Sterol O-acyltransferase 1	319.949	1001.13	8.41093	9.88284
ASHG19A3A005554	-2.13315	-1.09299	2.13315	down	coding	NM_032926	TCEAL3	RefSeq_coding	1142	chrX	+	102862833	102864854		ACAGGCCTGTCCCGGGTCCCGGCAGGTCTGCGCGTCTGTTCCCAGCGCTCTGCGAGGCCT	85012	Hs.311776	GO:0005634	NP_116315	Transcription elongation factor A (SII)-like 3	500.174	1211.23	9.06413	10.1571
ASHG19A3A030218	-2.05222	-1.03719	2.05222	down	coding	NM_153816	SNX14	RefSeq_coding	3505	chr6	-	86215216	86303629		GATGAACTGAGAATAACATTACGTTTTTTTGCATCTGTCTTAATAAGAAGGATTCACAAG	57231	Hs.485871	GO:0035091|GO:0004871|GO:0007154|GO:0015031|GO:0016021|GO:0016020	NP_722523	Sorting nexin 14	149.694	347.594	7.31147	8.34865
ASHG19A3A002097	-2.70703	-1.43671	2.70703	down	coding	NM_001128845	SMARCA4	RefSeq_coding	5329	chr19	+	11094827	11172959		ACAGCGACTCACTGACGGAGAAGCAGTGGCTCAAGACCCTGAAGGCCATCGAGGAGGGCA	6597	Hs.327527	GO:0005524|GO:0003677|GO:0008094|GO:0050681|GO:0004386|GO:0070577|GO:0016818|GO:0042802|GO:0000166|GO:0002039|GO:0047485|GO:0005515|GO:0016563|GO:0003714|GO:0006338|GO:0045749|GO:0060766|GO:0032582|GO:0010553|GO:0007399|GO:0010552|GO:0051091|GO:0045944|GO:0016514|GO:0071778|GO:0071565|GO:0071564|GO:0005634	NP_003063	SWI/SNF related, matrix associated, actin dependent regulator of chromatin, subfamily a, member 4	241.777	737.665	7.99948	9.43619
ASHG19A3A000652	-2.33539	-1.22366	2.33539	down	coding	NM_001001391	CD44	RefSeq_coding	4605	chr11	+	35160416	35253946		AGCACAGACAGAATCCCTGCTACCAGAGACCAAGACACATTCCACCCCAGTGGGGGGTCC	960	Hs.502328	GO:0005518|GO:0005540|GO:0005515|GO:0004888|GO:0016337|GO:0007160|GO:0019221|GO:0060333|GO:0043518|GO:0043066|GO:0070374|GO:0033138|GO:0050731|GO:0005794|GO:0009986|GO:0005737|GO:0005887|GO:0005886	NP_001189486	CD44 molecule (Indian blood group)	1389.99	3627.04	10.5269	11.7506
ASHG19A3A031534	-2.00698	-1.00503	2.00698	down	coding	NM_015607	C1orf77	RefSeq_coding	1293	chr1	+	153606524	153617979		TTTACTAATATGCTGAAGAACAAACAGCCGACGCCAGTGAATATTCGGGCTTCGATGCAG	26097	Hs.728799	GO:0003723|GO:0005515|GO:0043231|GO:0005730|GO:0005634	NP_056422	Chromosome 1 open reading frame 77	1004.49	2277.32	10.0577	11.0627
ASHG19A3A047790	-2.5801	-1.36743	2.5801	down	coding	NM_017440	MDM1	RefSeq_coding	2976	chr12	-	68688345	68726161		TCCTCAACCACAAGCTCAGAAGGAACCGTTAGTAGCAACATCAGAGCATTAGATCTTGCT	56890	Hs.655702	GO:0005634	NP_064513	Mdm1 nuclear protein homolog (mouse)	96.1455	276.344	6.65966	8.02709
ASHG19A3A033005	-2.09939	-1.06997	2.09939	down	coding	NM_181471	RFC2	RefSeq_coding	1715	chr7	-	73645833	73668738		ACAAAAAGTCACTCTTCCCAAAGGCCGACATAAGATCATCATTCTGGATGAAGCAGACAG	5982	Hs.647062	GO:0005524|GO:0003689|GO:0017111|GO:0000166|GO:0005515|GO:0006281|GO:0006260|GO:0006271|GO:0000084|GO:0000075|GO:0000278|GO:0006289|GO:0006297|GO:0000723|GO:0000722|GO:0032201|GO:0006283|GO:0005663|GO:0005654|GO:0005654|GO:0005634	NP_852136	Replication factor C (activator 1) 2, 40kDa	521.152	1240.32	9.12048	10.1905
ASHG19A3A044431	-3.84666	-1.94361	3.84666	down	coding	NM_178858	SFXN2	RefSeq_coding	2562	chr10	+	104474297	104498946		GTCCAACAGATATCACTGTGAATTGAATAAATTTGTTGAAAGAGCACACAGGCACACATA	118980	Hs.44070	GO:0008324|GO:0006826|GO:0055085|GO:0016021|GO:0016020|GO:0005743|GO:0005739	NP_849189	Sideroflexin 2	6473.41	27537.2	12.7381	14.6817
ASHG19A3A005176	-2.54824	-1.3495	2.54824	down	coding	NM_020865	DHX36	RefSeq_coding	3625	chr3	-	153993457	154042286		ATGTCACAAGTAATGTTTAAATCAGATAAATTTTTAATTATACCTTTACATTCACTGATG	170506	Hs.446270	GO:0005524|GO:0008026|GO:0004386|GO:0016787|GO:0003676|GO:0000166|GO:0005515|GO:0005737|GO:0005634	NP_065916	DEAH (Asp-Glu-Ala-His) box polypeptide 36	84.4212	240.554	6.47418	7.82368
ASHG19A3A027411	-3.50606	-1.80985	3.50606	down	coding	NM_020775	KIAA1324	RefSeq_coding	7032	chr1	+	109656584	109749401		ACGTTGCCAAGATCTACTCCATCAATGTCACCAATGTTATGAATGGTGTGGCCTCCTACT	57535	Hs.708190	GO:0003674|GO:0008150|GO:0005575|GO:0016021|GO:0016020	NP_065826	KIAA1324	833.575	3285.02	9.79134	11.6012
ASHG19A3A005661	-2.80451	-1.48775	2.80451	down	coding	NM_052817	MID2	RefSeq_coding	7255	chrX	+	107069083	107174865		TTCACTGGCCAGGCTAACTTCATCAGCCTGTATAATTCAGTAGACAGCTGGATGATTGTT	11043	Hs.12256	GO:0016874|GO:0046872|GO:0003674|GO:0008270|GO:0008150|GO:0005813|GO:0005737|GO:0005856|GO:0005622|GO:0005874	NP_438112	Midline 2	146.638	464.845	7.27825	8.766
ASHG19A3A015401	-2.80887	-1.48999	2.80887	down	coding	NM_003743	NCOA1	RefSeq_coding	6895	chr2	+	24807345	24993568		AGCAACTGCTCCTGTTGGCATCAATATGAGATCAGGCATGCAACAGCAAATTACACCTCA	8648	Hs.596314		NP_671766	Nuclear receptor coactivator 1	132.187	420.345	7.12878	8.61877
ASHG19A3A042601	-4.07685	-2.02746	4.07685	down	coding	NM_144569	SPOCD1	RefSeq_coding	3888	chr1	-	32256024	32281580		CTGCCCTGTTTGAACTTCCTGTTTGACAATGTTTGCTGTTGATTTTTTGTTCAATAAAGA	90853	Hs.62604		NP_653170	SPOC domain containing 1	505.305	2349.35	9.07852	11.106
ASHG19A3A041634	-2.50592	-1.32534	2.50592	down	coding	NM_005626	SFRS4	RefSeq_coding	2535	chr1	-	29474250	29508637		ACTGAAGTCAATGGGAGAAAAATCAGATTAGTTGAAGACAAGCCAGGTTCCAGACGACGC	6429	Hs.469970	GO:0003723|GO:0000166|GO:0008380|GO:0000375|GO:0010467|GO:0031124|GO:0006406|GO:0006397|GO:0000398|GO:0006369|GO:0006366|GO:0016607|GO:0005654|GO:0005634	NP_005617	Serine/arginine-rich splicing factor 4	103.092	288.934	6.76469	8.09003
ASHG19A3A049532	-5.32102	-2.4117	5.32102	down	coding	NM_025113	C13orf18	RefSeq_coding	3993	chr13	-	46916138	46961635		TGTGGGACTTCAAGAAGTACTACGTCAGCAATTTCTCCAAACAGCTGCTCGACAGCATAT	80183	Hs.98117		NP_079389	Chromosome 13 open reading frame 18	133.468	798.171	7.14199	9.55369
ASHG19A3A012782	-3.15654	-1.65834	3.15654	down	coding	NM_005178	BCL3	RefSeq_coding	1864	chr19	+	45251977	45263300		CGGGCACGGATCACGATGTAAATTATTAAGCATTTTGGTTGGATTTCTTTTGTAATAAAC	602	Hs.31210	GO:0005515|GO:0030674|GO:0003700|GO:0008134|GO:0030528|GO:0030330|GO:0042771|GO:0007249|GO:0042088|GO:0045064|GO:0019730|GO:0042742|GO:0042832|GO:0030198|GO:0002268|GO:0002467|GO:0002455|GO:0051457|GO:0002315|GO:0043066|GO:0045415|GO:0042536|GO:0032729|GO:0045082|GO:0045944|GO:0045727|GO:0000060|GO:0051101|GO:0042345|GO:0042981|GO:0006974|GO:0010225|GO:0009615|GO:0048536|GO:0032996|GO:0033257|GO:…	NP_005169	B-cell CLL/lymphoma 3	13352.1	45501.1	13.7736	15.4319
ASHG19A3A008112	-3.11868	-1.64094	3.11868	down	coding	NM_014680	KIAA0100	RefSeq_coding	7456	chr17	-	26941458	26972173		ATACATTGAAGCAAAAGACATCCTGGACTTGCCTCTTGGATGGCATGCAGTACTTTGCCA	9703	Hs.151761	GO:0005576	NP_055495	KIAA0100	85.9499	299.136	6.49803	8.13897
ASHG19A3A049742	-2.74467	-1.45663	2.74467	down	coding	NM_001105515	ABCC4	RefSeq_coding	3077	chr13	-	95748024	95953687		TAATGCTTATCTTTTTAGCCCTGTAATATTGTGTTTTCATAAACATACTTATCAATCTTT	10257	Hs.508423	GO:0016404|GO:0005524|GO:0016887|GO:0015662|GO:0042626|GO:0005254|GO:0000166|GO:0008150|GO:0007596|GO:0006811|GO:0030168|GO:0002576|GO:0055085|GO:0016021|GO:0005624|GO:0005886|GO:0031088|GO:0031088	NP_005836	ATP-binding cassette, sub-family C (CFTR/MRP), member 4	77.7422	239.37	6.36083	7.81747
ASHG19A3A051353	-2.13759	-1.09598	2.13759	down	coding	NM_007077	AP4S1	RefSeq_coding	1797	chr14	+	31494682	31555007		CCAGGCCCCACAAATATAGGCTAGAATCCGGAATGTTTTCTTGATTTAAAGACATCTTTA	11154	Hs.293411	GO:0008565|GO:0005215|GO:0006810|GO:0005794|GO:0005905|GO:0016020	NP_009008	Adaptor-related protein complex 4, sigma 1 subunit	83.4976	199.425	6.45739	7.55338
ASHG19A3A004522	-2.11281	-1.07916	2.11281	down	coding	NM_001025596	CELF1	RefSeq_coding	4474	chr11	-	47487490	47510576	NM_198700,NM_006560,	CCTGCTGACAGTGAGAAGAACAATGCAGTGGAAGACAGGAAGCTGTTTATTGGTATGATT	10658	Hs.595333	GO:0042835|GO:0003723|GO:0003729|GO:0000166|GO:0005515|GO:0031369|GO:0000900|GO:0016246|GO:0009790|GO:0007281|GO:0006397|GO:0006376|GO:0040018|GO:0043484|GO:0007286|GO:0005737|GO:0005634|GO:0030529|GO:0005625	NP_941989	CUGBP, Elav-like family member 1	83.1311	195.902	6.45098	7.53014
ASHG19A3A035294	-2.29045	-1.19563	2.29045	down	coding	NM_032534	KRBA1	RefSeq_coding	4020	chr7	+	149412147	149431662		CCTGGTCTAAGCTGGACTTACCTCTGTGGATTCTGAAATTAAAGAAGTGAGTTGCTAAGG	84626	Hs.299560	GO:0003674|GO:0008150|GO:0005575	NP_115923	KRAB-A domain containing 1	592.778	1539.44	9.30437	10.5
ASHG19A3A034131	-2.77093	-1.47037	2.77093	down	coding	NM_152793	C7orf41	RefSeq_coding	5814	chr7	+	30174551	30202381		GACCTCATCCGACCATGTAATTACCATTCGCTTGCTATTAAAGAGCCTTTCAAACTCTGG	222166	Hs.200100		NP_690006	Chromosome 7 open reading frame 41	2899.23	8931.72	11.5815	13.0518
ASHG19A3A004166	-2.44618	-1.29053	2.44618	down	coding	NM_003600	AURKA	RefSeq_coding	2346	chr20	-	54944444	54967351		ATACTGCTTGTTACTTATTACAGCTAGAGGCATCATGGACCGATCTAAAGAAAACTGCAT	6790	Hs.250822	GO:0005524|GO:0000166|GO:0005515|GO:0004672|GO:0019901|GO:0004674|GO:0031625|GO:0031145|GO:0007049|GO:0051301|GO:0007067|GO:0000278|GO:0048015|GO:0006468|GO:0031647|GO:0032355|GO:0007051|GO:0005737|GO:0005856|GO:0005829|GO:0005634|GO:0048471|GO:0005819|GO:0005876|GO:0031616	NP_940839	Aurora kinase A	112.338	308.358	6.89131	8.18183
ASHG19A3A048125	-3.57477	-1.83785	3.57477	down	coding	NM_006018	GPR109B	RefSeq_coding	2152	chr12	-	123199303	123201439		AGGATAGAAAGCTGTTTCCCACCTGTTTGCTTTTACCATTAAAAGGGAAACGTGCCTCTG	8843	Hs.458425	GO:0004930|GO:0045028|GO:0004872|GO:0007186|GO:0005887|GO:0005886|GO:0005886	NP_006009	G protein-coupled receptor 109B	199.461	802.808	7.72427	9.56212
ASHG19A3A009680	-5.2382	-2.38907	5.2382	down	coding	NM_007225	NXPH3	RefSeq_coding	5553	chr17	+	47653297	47661169		ATTGTAGAGACACAATGAAACAGTTGCTCTGTGTTGGGAAGTGATCCAGTGTCATCGCTG	11248	Hs.55069	GO:0003674|GO:0005515|GO:0005102|GO:0007218|GO:0005576	NP_009156	Neurexophilin 3	98.8624	582.269	6.70031	9.08938
ASHG19A3A020946	-2.4432	-1.28877	2.4432	down	coding	NM_001905	CTPS	RefSeq_coding	3217	chr1	+	41445006	41478231		TCTGTCATTAAGGCTCTGGAGCATTCTGCACTGGCCATCAACCACAAATTGGAAATCAAG	1503	Hs.473087	GO:0005524|GO:0003883|GO:0003883|GO:0003883|GO:0016874|GO:0000166|GO:0005515|GO:0006241|GO:0006541|GO:0015949|GO:0055086|GO:0006139|GO:0006221|GO:0042493|GO:0005575|GO:0005829	NP_001896	CTP synthase	240.855	663.807	7.99357	9.28234
ASHG19A3A046682	-3.01384	-1.5916	3.01384	down	coding	NM_138768	MYEOV	RefSeq_coding	2305	chr11	+	69061621	69064753		GAGCAGGCCGGATGTAAGTTATCAACTATAAATAAAACCAAGACTTCCGTTCTGGCTCTC	26579	Hs.523848		NP_620123	Myeloma overexpressed (in a subset of t(11;14) positive multiple myelomas)	132.682	450.814	7.13367	8.72528
ASHG19A3A019073	-2.46548	-1.30187	2.46548	down	coding	NM_001338	CXADR	RefSeq_coding	2492	chr21	+	18885329	18939264		CCAGCAAATCAAGCTGAGCTTTGAAAAAGTTTGTCTTAGTTTTGTGAAGGTGATTTATTC	1525	Hs.634837	GO:0004872|GO:0007596|GO:0048739|GO:0007155|GO:0045216|GO:0007507|GO:0044419|GO:0050900|GO:0007005|GO:0060044|GO:0050776|GO:0005912|GO:0016323|GO:0030054|GO:0005911|GO:0005737|GO:0005576|GO:0005887|GO:0005634|GO:0005886|GO:0005886|GO:0005923	NP_001329	Coxsackie virus and adenovirus receptor	327.728	914.371	8.44624	9.74811
ASHG19A3A028760	-5.04724	-2.33549	5.04724	down	coding	NM_133638	ADAMTS19	RefSeq_coding	5089	chr5	+	128796102	129074376		TGCTGATGAACAATGCCAGATCCTTTTTGGGCCATTGGCTTCTTTTTGTCAGGAGATGCA	171019	Hs.23751	GO:0046872|GO:0004222|GO:0008233|GO:0008270|GO:0006508|GO:0005576|GO:0005578	NP_598377	ADAM metallopeptidase with thrombospondin type 1 motif, 19	220.453	1254.45	7.86906	10.2046
ASHG19A3A043938	-5.09936	-2.35032	5.09936	down	coding	NM_002443	MSMB	RefSeq_coding	572	chr10	+	51549552	51562590		GCAGACTGACAACTGTGAGACATGCACTTGCTACGAAACAGAAATTTCATGTTGCACCCT	4477	Hs.255462	GO:0003674|GO:0008150|GO:0005576|GO:0005615|GO:0005634	NP_619540	Microseminoprotein, beta-	1763.41	10067.9	10.8749	13.2252
ASHG19A3A001101	-2.12491	-1.0874	2.12491	down	coding	NM_018261	EXOC1	RefSeq_coding	3426	chr4	+	56719815	56771244	NM_001024924,	AAAGTGCTGTCAAACAGGAAACAGAGAGTCTTCATGGAAGTTCGGGGAAATTAACTGGAT	55763	Hs.269665	GO:0006887|GO:0015031|GO:0000145	NP_839955	Exocyst complex component 1	321.528	773.253	8.41877	9.50617
ASHG19A3A054076	-2.13705	-1.09562	2.13705	down	coding	NM_000135	FANCA	RefSeq_coding	5460	chr16	-	89803958	89883065		TTTGCGATTCAACAAGTCAGGGAAGAAAACATCAGGAAGCAGCTAAAGAAGCTGGACTGC	2175	Hs.290154	GO:0005515|GO:0006281|GO:0008585|GO:0008584|GO:0007140|GO:0006461|GO:0042127|GO:0005737|GO:0005654|GO:0005634	NP_001018122	Fanconi anemia, complementation group A	202.085	490.005	7.74399	8.83961
ASHG19A3A042682	-4.73851	-2.24443	4.73851	down	coding	NM_000609	CXCL12	RefSeq_coding	3545	chr10	-	44865606	44880545		GGCCAATTCCTATACGCAGCGTGCTTTAAAAAATAAATAAGAAACAACTCTTTGAGAAAC	6387	Hs.522891	GO:0008009|GO:0008083|GO:0005102|GO:0004871|GO:0007186|GO:0008015|GO:0007155|GO:0006874|GO:0006935|GO:0006955|GO:0090026|GO:0008064|GO:0009615|GO:0007165|GO:0005576|GO:0005576|GO:0005615	NP_954637	Chemokine (C-X-C motif) ligand 12	2601.75	13802.3	11.4376	13.682
ASHG19A3A039044	-2.87005	-1.52108	2.87005	down	coding	NM_197977	ZNF189	RefSeq_coding	3280	chr9	+	104161162	104172942		ATTTGTGAGTTCTCCAGGTGAAGCACCATTTTTGACCTTCCCTTGTGTCTTCTGTTCCTG	7743	Hs.50123	GO:0003677|GO:0046872|GO:0003700|GO:0008270|GO:0000122|GO:0006355|GO:0006351|GO:0005622|GO:0005634	NP_932094	Zinc finger protein 189	107.485	347.569	6.82724	8.34831
ASHG19A3A038321	-2.18512	-1.12771	2.18512	down	coding	NM_005772	RCL1	RefSeq_coding	2169	chr9	+	4792833	4861064		ATGAAGCACCCGTTAAAAATAGTTCTACGAGGAGTGACCAATGATCAGGTTGACCCTTCA	10171	Hs.194121	GO:0003963|GO:0003824|GO:0006396|GO:0008150|GO:0042254|GO:0005730|GO:0005634	NP_005763	RNA terminal phosphate cyclase-like 1	532.938	1323.53	9.15356	10.2813
ASHG19A3A003877	-2.10891	-1.0765	2.10891	down	coding	NM_001211	BUB1B	RefSeq_coding	3749	chr15	+	40453209	40513335		TCAGCAAGAAAGAACAGGTGATCAGCAAGAAGAGACGATGCCTACAAAGGAGACAACTAA	56924	Hs.513645	GO:0005524|GO:0000166|GO:0005515|GO:0004674|GO:0006468	NP_064553	P21 protein (Cdc42/Rac)-activated kinase 6	133.3	315.99	7.13989	8.21639
ASHG19A3A003708	-3.20147	-1.67873	3.20147	down	coding	NM_001173463	KIF21A	RefSeq_coding	6542	chr12	-	39687030	39837192		GCTTTACTAGGCCATGCTTTACAAGAAAATGTAGAGGATAGTACTGATGAGGATGCTCCT	55605	Hs.374201	GO:0005524|GO:0003777|GO:0000166|GO:0007018|GO:0005737|GO:0005856|GO:0005874	NP_060111	Kinesin family member 21A	91.1901	325.252	6.57985	8.25858
ASHG19A3A023169	-2.94106	-1.55633	2.94106	down	coding	NM_004637	RAB7A	RefSeq_coding	2240	chr3	+	128444978	128533641		TTGAAGGATGACCTCTAGGAAGAAAGTGTTGCTGAAGGTTATCATCCTGGGAGATTCTGG	7879	Hs.728150	GO:0019003|GO:0005525|GO:0003924|GO:0000166|GO:0005515|GO:0006184|GO:0006184|GO:0006897|GO:0008333|GO:0007174|GO:0015031|GO:0007264|GO:0005794|GO:0031410|GO:0043231|GO:0005770|GO:0005770|GO:0005764|GO:0005764|GO:0042470|GO:0045335	NP_004628	RAB7A, member RAS oncogene family	676.018	2255.92	9.48898	11.0453
ASHG19A3A009408	-2.58181	-1.36838	2.58181	down	coding	NM_144975	SLFN5	RefSeq_coding	4660	chr17	+	33570085	33594754		AAATATGTCCTTAACTTCCTTGAAGTGCATGATAAGGGGGCCCTCCGTGGATATGTCTGT	162394	Hs.709347	GO:0005524|GO:0000166|GO:0030154|GO:0005634	NP_659412	Schlafen family member 5	65.0477	188.297	6.1036	7.47198
ASHG19A3A004360	-3.50562	-1.80967	3.50562	down	coding	NM_005040	PRCP	RefSeq_coding	2161	chr11	-	82535409	82611557		CTATTCGGTTCTCTACTTCCAACAGAAGGTTGATCATTTTGGATTTAATACTGTGAAAAC	5547	Hs.523936	GO:0008233|GO:0005515|GO:0004185|GO:0008236|GO:0007596|GO:0007597|GO:0006508|GO:0005764|GO:0005886	NP_955450	Prolylcarboxypeptidase (angiotensinase C)	155.618	619.379	7.36705	9.17672
ASHG19A3A048464	-2.0156	-1.01121	2.0156	down	coding	NM_015000	STK38L	RefSeq_coding	5110	chr12	+	27397077	27478888		CACCAGTTGGGTTTCATCCATCGGGATATTAAGCCAGACAACCTTTTATTGGATGCCAAG	23012	Hs.184523	GO:0005524|GO:0003779|GO:0000287|GO:0000166|GO:0005515|GO:0004674|GO:0007243|GO:0006468|GO:0051128|GO:0015629|GO:0005737	NP_055815	Serine/threonine kinase 38 like	194.416	442.119	7.68459	8.69579
ASHG19A3A024087	-3.26154	-1.70556	3.26154	down	coding	NM_002913	RFC1	RefSeq_coding	4925	chr4	-	39289075	39367995		ATGAAAAAGCACCTGATGCTTTTAAGCAGAGCAGCAGACAGCATATGCGATGGTGACCTA	5981	Hs.507475	GO:0005524|GO:0003689|GO:0008047|GO:0017111|GO:0000166|GO:0005515|GO:0006281|GO:0006271|GO:0006261|GO:0000084|GO:0000278|GO:0006289|GO:0006297|GO:0000723|GO:0000722|GO:0032201|GO:0007004|GO:0006283|GO:0005663|GO:0005622|GO:0005654|GO:0005654|GO:0005634	NP_002904	Replication factor C (activator 1) 1, 145kDa	75.6894	276.218	6.32099	8.02654
ASHG19A3A040208	-2.09843	-1.06931	2.09843	down	coding	NM_021992	TMSB15A	RefSeq_coding	666	chrX	-	101768610	101771699		TCCATTGCTTCATAATCTTCATGAAGTTGCATGCTTTTGCAGCTTTTCACAGTTTATTTG	11013	Hs.56145	GO:0003779|GO:0030036|GO:0042989|GO:0005737|GO:0005856	NP_068832	Thymosin beta 15a	276.416	656.915	8.19735	9.26666
ASHG19A3A033587	-2.16968	-1.11748	2.16968	down	coding	NM_001008225	CNOT4	RefSeq_coding	2808	chr7	-	135072763	135194851		TGCCTAGTATACCAGGAAATGCCTCAAAAACAGAACTTCAGTTTATAGTTGACTTATCTG	4850	Hs.490224	GO:0003723|GO:0016874|GO:0046872|GO:0000166|GO:0005515|GO:0004842|GO:0008270|GO:0016070|GO:0016071|GO:0000288|GO:0000289|GO:0051865|GO:0005737|GO:0005829|GO:0005634	NP_037448	CCR4-NOT transcription complex, subunit 4	341.793	840.423	8.50603	9.62351
ASHG19A3A037601	-8.05581	-3.01003	8.05581	down	coding	NM_004297	GNA14	RefSeq_coding	2492	chr9	-	80037995	80263232		ATTATTTTCTTGGTTGCTCTGAGTGAATATGACCAGGTCCTGGCTGAGTGTGACAACGAG	9630	Hs.657795	GO:0031683|GO:0001664|GO:0005525|GO:0003924|GO:0019001|GO:0000166|GO:0004871|GO:0007186|GO:0007188|GO:0006184|GO:0006184|GO:0060158|GO:0007596|GO:0030168|GO:0006471|GO:0007165|GO:0031234|GO:0005834|GO:0005886|GO:0005886	NP_004288	Guanine nucleotide binding protein (G protein), alpha 14	193.025	1742.83	7.6758	10.6858
ASHG19A3A042778	-2.52301	-1.33514	2.52301	down	coding	NM_003631	PARG	RefSeq_coding	4276	chr10	-	51026326	51371331	uc010qhh.1,NR_029388,ENST00000456092,	ACACGATTGCATGTCACTTACGAAGGTACCATAGAAGAAAATGGCCAAGGCATGCTACAG	8505	Hs.499594	GO:0003682|GO:0016787|GO:0004649|GO:0005975|GO:0016045|GO:0045739|GO:0006974|GO:0000785|GO:0005737|GO:0005829|GO:0043231|GO:0005792|GO:0005730|GO:0005634|GO:0005625	NP_003622	Poly (ADP-ribose) glycohydrolase	105.825	298.922	6.80269	8.13783
ASHG19A3A044633	-2.08229	-1.05817	2.08229	down	coding	NM_078469	BCCIP	RefSeq_coding	2373	chr10	+	127512103	127531375		TGCCAGATAATCTAAGTCTTCCAATGCCTGCATCAAACTTTCTGGTGCTAGGAAAGGAAA	56647	Hs.715543	GO:0019207|GO:0005515|GO:0006281|GO:0007049|GO:0061101|GO:0000079|GO:0019908|GO:0005634	NP_510869	BRCA2 and CDKN1A interacting protein	157.153	369.452	7.3801	8.43827
ASHG19A3A013385	-2.25846	-1.17534	2.25846	down	coding	NM_175630	DNMT3A	RefSeq_coding	1808	chr2	-	25504321	25565459		ATGGATCCAACCTAATGTTCATGCAGGATAGAGAACATTTCCAGAATACAAATTTCCAAA	1788	Hs.515840	GO:0003886|GO:0003677|GO:0003682|GO:0046872|GO:0008168|GO:0005515|GO:0016740|GO:0008270|GO:0090116|GO:0006306|GO:0043045|GO:0043046|GO:0016568|GO:0006346|GO:0000122|GO:0006349|GO:0007283|GO:0000775|GO:0005737|GO:0000791|GO:0005720|GO:0016363|GO:0005634	NP_783329	DNA (cytosine-5-)-methyltransferase 3 alpha	118.08	299.487	6.96517	8.14051
ASHG19A3A029812	-4.83679	-2.27405	4.83679	down	coding	NM_012391	SPDEF	RefSeq_coding	1894	chr6	-	34505579	34524091		AGTTGCTACTCAAGCCCCACAGCTATGGCCGCTTCATTAGGTGGCTCAACAAGGAGAAGG	25803	Hs.485158	GO:0043565|GO:0003700|GO:0007275|GO:0010553|GO:0008634|GO:0043065|GO:0006355|GO:0005634	NP_036523	SAM pointed domain containing ets transcription factor	269.791	1468.8	8.16168	10.4357
ASHG19A3A018921	-3.2994	-1.7222	3.2994	down	coding	NM_003226	TFF3	RefSeq_coding	1054	chr21	-	43731777	43735706		CTCGCTACTGTTCAATACTTGTACTATTCCTGGGTTTTGTTTCTTTGTACAGTAAACATT	7033	Hs.82961	GO:0003674|GO:0006952|GO:0007586|GO:0043434|GO:0032579|GO:0005576|GO:0005578|GO:0030141	NP_003217	Trefoil factor 3 (intestinal)	174.031	649.2	7.52765	9.24985
ASHG19A3A050851	-2.27641	-1.18676	2.27641	down	coding	NM_005982	SIX1	RefSeq_coding	2687	chr14	-	61111417	61116155		GCCTGGGGCAAAATGATGTATCTTCTGTATTTAGCTTTTAAAATTAGTGAAACAAATGGC	6495	Hs.713114	GO:0003677|GO:0003682|GO:0010843|GO:0005515|GO:0043565|GO:0003700|GO:0030528|GO:0001658|GO:0048704|GO:0030855|GO:0048699|GO:0048839|GO:0042472|GO:0001822|GO:0051451|GO:0043524|GO:0001759|GO:0007389|GO:0045944|GO:0034504|GO:0045664|GO:0006355|GO:0007519|GO:0048538|GO:0030878|GO:0006351|GO:0001657|GO:0005730|GO:0005634|GO:0005667	NP_005973	SIX homeobox 1	775.695	2004.17	9.69038	10.8771
ASHG19A3A026800	-5.47398	-2.45259	5.47398	down	coding	NM_176895	PPAP2A	RefSeq_coding	1641	chr5	-	54720684	54830873		TTTCTGTAAAGACAACAGCATCAACTATCCGTACCATGACAGTACCGTCACATCCACTGT	8611	Hs.696231	GO:0016787|GO:0008195|GO:0008195|GO:0042392|GO:0007205|GO:0030521|GO:0008354|GO:0006629|GO:0008285|GO:0046839|GO:0019216|GO:0006665|GO:0030518|GO:0005887|GO:0005624|GO:0005886	NP_795714	Phosphatidic acid phosphatase type 2A	89.2985	549.074	6.55168	9.00427
ASHG19A3A011691	-2.63885	-1.39991	2.63885	down	coding	NM_017916	PIH1D1	RefSeq_coding	1256	chr19	-	49949549	49955115		TAGTCTTAGGCCAGTCTTAGGTTTTTGAACAGGATAGTAGGTATCCGGAGTCGATTGAGG	55011	Hs.5245	GO:0000492|GO:0070761	NP_060386	PIH1 domain containing 1	157.353	470.101	7.38215	8.78206
ASHG19A3A022495	-2.10724	-1.07536	2.10724	down	coding	NM_014965	TRAK1	RefSeq_coding	4630	chr3	+	42201660	42254107		CAGAGCCTGCTGTCCCATGGAGAAAAAGTTTTAAGCACTGAAAAAATTTGATTAATGTAT	22906	Hs.535711	GO:0050811|GO:0005515|GO:0008333|GO:0006493|GO:0006605|GO:0006357|GO:0005737|GO:0005769|GO:0005739|GO:0005634	NP_055780	Trafficking protein, kinesin binding 1	1770.66	4194.73	10.8802	11.9555
ASHG19A3A051101	-2.24541	-1.16698	2.24541	down	coding	NM_173849	GSC	RefSeq_coding	1217	chr14	-	95234560	95236499		CCCCACCGTAGTATTTATAGTTAAATTAAGGGTGACAGTACAATAAAGTGATGGCGATGT	145258	Hs.440438	GO:0003677|GO:0043565|GO:0003700|GO:0030528|GO:0009653|GO:0021904|GO:0043583|GO:0048704|GO:0030900|GO:0007369|GO:0042474|GO:0007275|GO:0048644|GO:0030178|GO:0000122|GO:0006355|GO:0005634|GO:0005667	NP_776248	Goosecoid homeobox	2217.11	5613.94	11.2063	12.3733
ASHG19A3A001447	-3.06068	-1.61385	3.06068	down	coding	NM_001042618	PARP2	RefSeq_coding	1865	chr14	+	20811772	20826062		TAATAAGGACAGGACAGAAGACAAGCAAGATGAATCTGTGAAGGCCTTGCTGTTAAAGGG	10038	Hs.409412	GO:0003677|GO:0003950|GO:0016757|GO:0006281|GO:0006284|GO:0006471|GO:0005730|GO:0005654|GO:0005634	NP_005475	Poly (ADP-ribose) polymerase 2	88.2168	300.861	6.53376	8.14762
ASHG19A3A025138	-2.56175	-1.35713	2.56175	down	coding	NM_001127178	PIGG	RefSeq_coding	3266	chr4	+	492988	533319		TTTCTCTGCTCTTTTATTTGGTGATCCTGGTTCTTTCGGCCGTTCACGTCATTGTGTGCA	54872	Hs.7099	GO:0051267|GO:0016780|GO:0016740|GO:0006501|GO:0006506|GO:0044267|GO:0043687|GO:0016254|GO:0005783|GO:0005789|GO:0016021|GO:0016020	NP_060203	Phosphatidylinositol glycan anchor biosynthesis, class G	93.4177	266.286	6.61803	7.97516
ASHG19A3A033953	-4.34947	-2.12084	4.34947	down	coding	NM_138426	GLCCI1	RefSeq_coding	4762	chr7	+	8008422	8128707		AAGGAGAAAGATCGCCAGTCACCTCTTCATGGCAACCATATAACAATCAGTCACACTCAG	113263	Hs.131673	GO:0005737	NP_612435	Glucocorticoid induced transcript 1	356.406	1748.21	8.56893	10.6898
ASHG19A3A021623	-2.18135	-1.12522	2.18135	down	coding	NM_001005861	RYK	RefSeq_coding	2942	chr3	-	133875977	133969586		ATTCCAAGTGGACAATGTTTTGGCAATGGATATGCCCCAGGTCAACATTTCTGTTCAGGG	6259	Hs.654562	GO:0005524|GO:0042813|GO:0017147|GO:0000166|GO:0005515|GO:0004713|GO:0016740|GO:0004888|GO:0004714|GO:0016055|GO:0007411|GO:0071679|GO:0022038|GO:0050919|GO:0048843|GO:0030182|GO:0031175|GO:0043410|GO:0006468|GO:0007165|GO:0048705|GO:0005737|GO:0016021|GO:0005887|GO:0016020|GO:0005624|GO:0005634|GO:0005886	NP_002949	RYK receptor-like tyrosine kinase	67.4214	164.46	6.1542	7.27942
ASHG19A3A004279	-2.34591	-1.23015	2.34591	down	coding	NM_004404	SEPT2	RefSeq_coding	3311	chr2	+	242255280	242293439		CGCCTGTTCTCGGGCTGTTTGGCGGACGAAGCTTCACAAAAGATGTCTAAGGTAAGATCA	4735	Hs.728805	GO:0005525|GO:0030234|GO:0000166|GO:0005515|GO:0032947|GO:0007049|GO:0051301|GO:0007067|GO:0031175|GO:0002036|GO:0032880|GO:0015629|GO:0005938|GO:0042995|GO:0009986|GO:0032154|GO:0000777|GO:0005737|GO:0000145|GO:0030496|GO:0005730|GO:0005634|GO:0048471|GO:0005886|GO:0031105|GO:0005819|GO:0019717	NP_006146	Septin 2	130.09	344.99	7.10739	8.33753
ASHG19A3A023102	-2.16646	-1.11534	2.16646	down	coding	NM_006810	PDIA5	RefSeq_coding	1873	chr3	+	122785855	122880953		AAGACTTTGACCAGTTTGTGAAGGAACACTCCTCTGTCCTCGTCATGTTCCACGCCCCAT	10954	Hs.477352	GO:0009055|GO:0016853|GO:0016491|GO:0003756|GO:0015035|GO:0045454|GO:0006662|GO:0055114|GO:0006457|GO:0006950|GO:0005783|GO:0005788	NP_006801	Protein disulfide isomerase family A, member 5	620.331	1515.53	9.3654	10.4807
ASHG19A3A020087	-2.28948	-1.19502	2.28948	down	coding	NM_003504	CDC45	RefSeq_coding	1938	chr22	+	19467415	19508134	NM_001178010,	TTCTTTGTGTGTGACACCCATAGGCCAGTCAATGTCGTCAATGTATACAACGATACCCAG	8318	Hs.474217	GO:0005515|GO:0006260|GO:0000076|GO:0006271|GO:0006270|GO:0000082|GO:0000216|GO:0000084|GO:0000075|GO:0000278|GO:0000083|GO:0005813|GO:0005737|GO:0005654|GO:0005654|GO:0005634	NP_003495	Cell division cycle 45 homolog (S. cerevisiae)	234.003	606.652	7.95344	9.14846
ASHG19A3A039657	-2.33774	-1.22511	2.33774	down	coding	NM_006243	PPP2R5A	RefSeq_coding	3145	chr1	+	212458878	212535204		ACACTTCCTCCAAGTGATAATCCAGATTTTGATCCAGAAGAGGATGAACCCACGCTTGAG	5525	Hs.497684	GO:0019900|GO:0005515|GO:0008601|GO:0090005|GO:0090219|GO:0035307|GO:0007165|GO:0000775|GO:0005737|GO:0005624|GO:0005634|GO:0000159	NP_006234	Protein phosphatase 2, regulatory subunit B', alpha	237.464	627.835	7.9726	9.19772
ASHG19A3A043477	-3.13527	-1.64859	3.13527	down	coding	NM_198472	C10orf125	RefSeq_coding	768	chr10	-	135168657	135171529		ACGAGTATCCCTGATTTGTGAAAATGATGGAAAAACGTTCAGTCTCAAGAGTCCAATTCC	282969	Hs.155823	GO:0016857|GO:0008643	NP_940874	Chromosome 10 open reading frame 125	946.129	3311.05	9.96858	11.6172
ASHG19A3A038148	-3.2442	-1.69786	3.2442	down	coding	NM_007344	TTF1	RefSeq_coding	3137	chr9	-	135250938	135282221		AGCACAATCAAGCGGATGTACCGGGACGACTTGGAACGGTTTAAGGAATTTAAAGCACAA	7270	Hs.54780	GO:0003677|GO:0003716|GO:0003682|GO:0003715|GO:0006338|GO:0008156|GO:0006363|GO:0006360|GO:0006361|GO:0006353|GO:0005730|GO:0005654|GO:0005654|GO:0005634	NP_031370	Transcription termination factor, RNA polymerase I	149.4	549.75	7.30843	9.00629
ASHG19A3A000587	-2.55785	-1.35493	2.55785	down	coding	NM_000532	PCCB	RefSeq_coding	1825	chr3	+	135969166	136049015		GAAGATTGGTTTATGTCTTCAGTCAGGATTTTACAGTTTTTGGAGGCAGTCTGTCAGGAG	5096	Hs.63788	GO:0005524|GO:0016874|GO:0000166|GO:0004658|GO:0044255|GO:0006635|GO:0005759|GO:0005739	NP_001171485	Propionyl CoA carboxylase, beta polypeptide	559.289	1625.15	9.22371	10.5786
ASHG19A3A051085	-2.34633	-1.2304	2.34633	down	coding	NM_018167	BTBD7	RefSeq_coding	2568	chr14	-	93753975	93799385		CCAAGGAAAGAGGTGTCTCGGAAGAAATCAATTACTTTCAATGTTTGAACATTAAATAGC	55727	Hs.525549		NP_060637	BTB (POZ) domain containing 7	1393.19	3654.81	10.5301	11.7605
ASHG19A3A013563	-2.54683	-1.3487	2.54683	down	coding	NM_001101330	LOC728819	RefSeq_coding	1170	chr2	-	43902291	43903461		TTTCTTGCCTCCAGTTGGTTCAGAAAATGACTGAGGCCTGGAGAATAATAGACCTGTGCT	728819	Hs.602756		NP_001094800	HCG1645220	146.257	421.531	7.27456	8.62327
ASHG19A3A019534	-2.03809	-1.02722	2.03809	down	coding	NM_002745	MAPK1	RefSeq_coding	5916	chr22	-	22113948	22221970		TCAGAGCAAGAAGTCATAAAGATAGGATTTCTTGGACATTTGGTTCTTATCAATATTGGG	5594	Hs.431850	GO:0005524|GO:0003677|GO:0004707|GO:0008353|GO:0016301|GO:0016301|GO:0031435|GO:0000166|GO:0019902|GO:0001784|GO:0005515|GO:0004674|GO:0008134|GO:0050853|GO:0070371|GO:0000189|GO:0000165|GO:0002755|GO:0002755|GO:0002756|GO:0002756|GO:0007265|GO:0050852|GO:0008063|GO:0000187|GO:0000186|GO:0007411|GO:0007596|GO:0007049|GO:0006935|GO:0019858|GO:0007173|GO:0006917|GO:0045087|GO:0008286|GO:0044419|GO:…	NP_620407	Mitogen-activated protein kinase 1	210.13	485.457	7.80039	8.82761
ASHG19A3A050384	-2.27649	-1.18681	2.27649	down	coding	NM_005708	GPC6	RefSeq_coding	7114	chr13	+	93879077	95060267		TGGAAGAGACAAGCCATTTTGTGCGCACCACTTTTGTGTCCAGGCATAAGAAATTTGACG	10082	Hs.444329	GO:0043395|GO:0031225|GO:0005576|GO:0005615|GO:0005887|GO:0005886|GO:0005578	NP_005699	Glypican 6	134.533	345.454	7.15294	8.33975
ASHG19A3A007012	-2.20214	-1.13891	2.20214	down	coding	NM_206928	SYTL2	RefSeq_coding	4759	chr11	-	85405266	85437511	NM_001162951,	AGAAGAATTAGTGCGTAGTGCTGAAGATGTTTCCACAGTGCCTACACAACCTGATAATCC	54843	Hs.369520	GO:0017137|GO:0042043|GO:0005546|GO:0001786|GO:0005515|GO:0008270|GO:0006887|GO:0006886|GO:0006904|GO:0016192|GO:0005737|GO:0070382|GO:0019897|GO:0042470|GO:0005624|GO:0005886	NP_996813	Synaptotagmin-like 2	854.445	2131.86	9.82716	10.9661
ASHG19A3A051520	-2.19346	-1.13321	2.19346	down	coding	NM_005956	MTHFD1	RefSeq_coding	3466	chr14	+	64854758	64926727		AGACATTGGAATGGAAAAGTTTTTTAACATCAAATGCCGGTATTCCGGCCTCTGCCCCCA	4522	Hs.652308	GO:0005524|GO:0004329|GO:0016787|GO:0016874|GO:0004477|GO:0004488|GO:0004486|GO:0000166|GO:0016491|GO:0005515|GO:0008652|GO:0046655|GO:0009396|GO:0000105|GO:0009086|GO:0006730|GO:0055114|GO:0006164|GO:0006766|GO:0006767|GO:0005737|GO:0005829|GO:0005739	NP_005947	Methylenetetrahydrofolate dehydrogenase (NADP+ dependent) 1, methenyltetrahydrofolate cyclohydrolase, formyltetrahydrofolate synthetase	909.899	2256.86	9.91249	11.0457
ASHG19A3A029481	-3.23221	-1.69252	3.23221	down	coding	NM_016356	DCDC2	RefSeq_coding	4708	chr6	-	24171983	24358280		AATCAGTGGGATCATGTACTACAAATGGTCACAGAAAAAATCACTCTGAGGAGCGGGGCT	51473	Hs.61345	GO:0006968|GO:0035556|GO:0007399|GO:0001764|GO:0001764	NP_057440	Doublecortin domain containing 2	158.411	580.279	7.39227	9.0848
ASHG19A3A001460	-6.1864	-2.6291	6.1864	down	coding	NM_001044390	MUC1	RefSeq_coding	1005	chr1	-	155158301	155162700		GTTTTCTGGGCCTCTCCAATATTAAGTTCAGTGAGTGATGTGCCATTTCCTTTCTCTGCC	4582	Hs.89603	GO:0005515|GO:0016324|GO:0005737|GO:0005576|GO:0005887|GO:0005634|GO:0005886	NP_002447	Mucin 1, cell surface associated	537.105	3742.55	9.16556	11.7947
ASHG19A3A043102	-2.76473	-1.46714	2.76473	down	coding	NM_005398	PPP1R3C	RefSeq_coding	2646	chr10	-	93388200	93392858		TCACTCTCCTCTAGCTATCCTTGATGAGCTTCTCACTTTAAGAATAAATGTGTTTGATAT	5507	Hs.303090	GO:0019899|GO:0005515|GO:0004722|GO:0005975|GO:0005979|GO:0005981|GO:0042587|GO:0005792|GO:0005625	NP_005389	Protein phosphatase 1, regulatory (inhibitor) subunit 3C	9392.23	28419.2	13.2669	14.734
ASHG19A3A021033	-2.1183	-1.08291	2.1183	down	coding	NM_003365	UQCRC1	RefSeq_coding	1636	chr3	-	48636431	48647098		CGTTTTGAGACTGAGAAGAATAATGGGGCAGGCTACTTTTTGGAGCATCTGGCTTTCAAG	7384	Hs.119251	GO:0003824|GO:0046872|GO:0004222|GO:0005515|GO:0032403|GO:0008121|GO:0008270|GO:0009060|GO:0006122|GO:0055114|GO:0006119|GO:0006508|GO:0022904|GO:0014823|GO:0043279|GO:0006810|GO:0016020|GO:0005743|GO:0005746|GO:0005750|GO:0005739	NP_003356	Ubiquinol-cytochrome c reductase core protein I	129.469	308.693	7.10051	8.18342
ASHG19A3A034282	-5.2158	-2.38289	5.2158	down	coding	NM_005856	RAMP3	RefSeq_coding	1376	chr7	+	45197366	45223847		CTTGTGGCCTCTATCTGCTACCATCTGTGTTTTATCTGAGTAAAGTTACCTTACTTCTGG	10268	Hs.25691	GO:0015026|GO:0008565|GO:0006886|GO:0015031|GO:0006898|GO:0008277|GO:0005887|GO:0005764|GO:0005886|GO:0005886	NP_005847	Receptor (G protein-coupled) activity modifying protein 3	8832.67	49930.1	13.1878	15.5707
ASHG19A3A047257	-3.3352	-1.73777	3.3352	down	coding	NM_016546	C1RL	RefSeq_coding	3398	chr12	-	7247146	7261869		GAGGTGGTTTTATTGATAAGATTTTGGCTGTTTGGTTTTCCACTATTCTCTATTGGCTAA	51279	Hs.631730	GO:0008233|GO:0004252|GO:0006958|GO:0045087|GO:0006508|GO:0005576|GO:0005615	NP_057630	Complement component 1, r subcomponent-like	94.1653	351.907	6.62985	8.36762
ASHG19A3A041133	-2.14147	-1.0986	2.14147	down	coding	NM_001005609	EDA	RefSeq_coding	5290	chrX	+	68835910	69259319		GGGATGTAAGTTTGTGTAAATTAATGGTTTATTCTTTGCAAATAAAACGCTTTCCCCGTC	1896	Hs.105407	GO:0005515|GO:0005102|GO:0005164|GO:0030154|GO:0007398|GO:0006955|GO:0007275|GO:0051092|GO:0007165|GO:0005856|GO:0005576|GO:0016021|GO:0005624|GO:0005886	NP_001390	Ectodysplasin A	1231.94	2984.62	10.3546	11.4532
ASHG19A3A018899	-4.09165	-2.03268	4.09165	down	coding	NM_001389	DSCAM	RefSeq_coding	7110	chr21	-	41384342	42219039		TCCTGCCATGCTATTAATTCTTATGGGGAGGACCGTGGAATAATTCAGCTCACAGTGCAA	1826	Hs.397800	GO:0005515|GO:0007155|GO:0048813|GO:0070593|GO:0007626|GO:0007162|GO:0007399|GO:0048842|GO:0042327|GO:0060060|GO:0030424|GO:0005576|GO:0030426|GO:0005887|GO:0005624|GO:0005886|GO:0005886|GO:0005886	NP_001380	Down syndrome cell adhesion molecule	134.25	621.347	7.14966	9.18234
ASHG19A3A024703	-2.78958	-1.48005	2.78958	down	coding	NM_020337	ANKRD50	RefSeq_coding	8802	chr4	-	125585205	125633887		TCTGCAAAGCCCAGGACTCTGATACTTTGTGTGTTGGAGGGTTTATTAGAGGTCTAGTAG	57182	Hs.480694		NP_065070	Ankyrin repeat domain 50	138.128	435.154	7.19283	8.67288
ASHG19A3A044485	-2.0451	-1.03217	2.0451	down	coding	NM_005445	SMC3	RefSeq_coding	4131	chr10	+	112327448	112364390		AAAGACTCTTATTTGTCGTAGCATGGAAGTTTCAACCCAGCTGGCCCGTGCTTTCACTAT	9126	Hs.24485	GO:0005524|GO:0045502|GO:0003777|GO:0000166|GO:0005515|GO:0046982|GO:0009294|GO:0006281|GO:0000087|GO:0051301|GO:0007126|GO:0007067|GO:0000278|GO:0007091|GO:0000236|GO:0007052|GO:0032876|GO:0006275|GO:0007165|GO:0007062|GO:0007062|GO:0005604|GO:0000785|GO:0005694|GO:0000775|GO:0008278|GO:0005737|GO:0000800|GO:0030893|GO:0016363|GO:0005654|GO:0005634|GO:0000922	NP_005436	Structural maintenance of chromosomes 3	490.12	1138.07	9.03454	10.0667
ASHG19A3A033814	-2.92272	-1.54731	2.92272	down	coding	NM_022458	LMBR1	RefSeq_coding	4909	chr7	-	156473570	156685902		ATTGGAAATTGTGTGTCCATCTTGGTTTTGAGCTCTGCTCTGCCTGTGATGTCGAGAACA	64327	Hs.209989	GO:0004872|GO:0042733|GO:0016021|GO:0016020	NP_071903	Limb region 1 homolog (mouse)	1507.09	4910.59	10.6382	12.1855
ASHG19A3A010091	-2.00888	-1.00639	2.00888	down	coding	NM_004514	FOXK2	RefSeq_coding	5262	chr17	+	80477593	80562481		AGGTCAACACCAGCTACCAATAAAAACTGTAACACAAAACGGCACTCACGTGGCATCAGT	3607	Hs.591140	GO:0008301|GO:0003702|GO:0003690|GO:0000287|GO:0010843|GO:0043565|GO:0003700|GO:0003705|GO:0003704|GO:0016566|GO:0016563|GO:0008134|GO:0009790|GO:0010553|GO:0007389|GO:0051090|GO:0006357|GO:0006355|GO:0009888|GO:0006351|GO:0043231|GO:0005730|GO:0005634|GO:0005634|GO:0005667	NP_004505	Forkhead box K2	237.51	538.74	7.97287	8.97927
ASHG19A3A003362	-2.15692	-1.10897	2.15692	down	coding	NM_001166270	HAUS4	RefSeq_coding	1514	chr14	-	23415437	23426351		CCTTGAGAGCTTCAGCTGCCCCAGGATTAGAATCCCAAGAAAATCAAATGGCATCCGGGG	54930	Hs.442782	GO:0003674|GO:0007049|GO:0051301|GO:0051297|GO:0007067|GO:0051225|GO:0070652|GO:0005737|GO:0005856|GO:0005874|GO:0005815|GO:0005819	NP_060285	HAUS augmin-like complex, subunit 4	187.764	457.009	7.63466	8.74363
ASHG19A3A004032	-2.83625	-1.50399	2.83625	down	coding	NM_002456	MUC1	RefSeq_coding	1209	chr1	-	155158301	155162700		GCCCAGCTCTACTGAGAAGAATGCTTTGTCTACTGGGGTCTCTTTCTTTTTCCTGTCTTT	4582	Hs.89603	GO:0005515|GO:0016324|GO:0005737|GO:0005576|GO:0005887|GO:0005634|GO:0005886	NP_002447	Mucin 1, cell surface associated	359.513	1153.92	8.58422	10.0882
ASHG19A3A005526	-2.0944	-1.06654	2.0944	down	coding	NM_032485	MCM8	RefSeq_coding	3704	chr20	+	5931297	5975829		GTCAAAGTCTCAAATGCGGAAGAAGGTTCTCGAAATAAGAATGACAAGTGTATGTTCCTT	84515	Hs.597484	GO:0005524|GO:0003677|GO:0017111|GO:0000166|GO:0006260|GO:0006271|GO:0000082|GO:0000216|GO:0000084|GO:0000075|GO:0000278|GO:0005654|GO:0005654|GO:0005634	NP_877954	Minichromosome maintenance complex component 8	146.88	347.327	7.28084	8.34738
ASHG19A3A000881	-2.33407	-1.22284	2.33407	down	coding	NM_001008660	PICALM	RefSeq_coding	3734	chr11	-	85668485	85780108		AACCGCTTGGAATGCTGCAACAATGAATGGCATGCATTTTCCACAATACGTAAGTGACCA	8301	Hs.163893	GO:0005545|GO:0030276|GO:0032050|GO:0005543|GO:0005515|GO:0007409|GO:0048268|GO:0048813|GO:0016197|GO:0030097|GO:0048261|GO:0006461|GO:0031623|GO:0006898|GO:0030100|GO:0032880|GO:0016192|GO:0030122|GO:0005794|GO:0030132|GO:0030136|GO:0005905|GO:0031410|GO:0005622|GO:0043231|GO:0005634|GO:0048471|GO:0045211|GO:0042734	NP_009097	Phosphatidylinositol binding clathrin assembly protein	687.907	1808.39	9.51331	10.7362
ASHG19A3A050241	-3.81567	-1.93194	3.81567	down	coding	NM_005599	NHLH2	RefSeq_coding	2512	chr1	-	116379000	116383747		TTTTCACCAACCTTTCTCCAAGCATCTCCAAGCCACTGACTATATATATTTTGCTACAAG	4808	Hs.46296	GO:0003677|GO:0030528|GO:0030154|GO:0007417|GO:0007617|GO:0007275|GO:0042698|GO:0005634	NP_005590	Nescient helix loop helix 2	75.1331	321.324	6.30993	8.24186
ASHG19A3A040236	-2.20834	-1.14296	2.20834	down	coding	NM_024709	C1orf115	RefSeq_coding	2990	chr1	+	220863627	220872499		GACCAAGAGACTTCTTTTGTATCCTTTTCTTGTCCTATGATGTAAATAAAAGCCTCGATT	79762	Hs.519839	GO:0016021|GO:0016020	NP_078985	Chromosome 1 open reading frame 115	1700.95	4213.25	10.8182	11.9612
ASHG19A3A039232	-2.66665	-1.41503	2.66665	down	coding	NM_182487	OLFML2A	RefSeq_coding	6556	chr9	+	127539436	127577157		GCTGAGATATCTGTTTTGCAACAAGATGGGCTATATCTAAATAAAGACATGATCAAAGGT	169611	Hs.357004	GO:0050840|GO:0042803|GO:0030198|GO:0031012|GO:0005576	NP_872293	Olfactomedin-like 2A	898.254	2696.91	9.89427	11.3093
ASHG19A3A046803	-3.14706	-1.65401	3.14706	down	coding	NM_002227	JAK1	RefSeq_coding	5053	chr1	-	65298905	65432187		TTCATGCACCGGAAAAGCGATGTCCTTACCACACCATGGAAATTCAAAGTTGCCAAACAG	3716	Hs.207538	GO:0005524|GO:0005131|GO:0004715|GO:0000166|GO:0005515|GO:0004713|GO:0004713|GO:0019221|GO:0007167|GO:0060333|GO:0007243|GO:0035556|GO:0018108|GO:0006468|GO:0060334|GO:0060338|GO:0046677|GO:0060337|GO:0005737|GO:0005856|GO:0005829|GO:0005829|GO:0012505|GO:0016020|GO:0005634	NP_002218	Janus kinase 1	65.675	231.801	6.11691	7.77092
ASHG19A3A054678	-2.09724	-1.06849	2.09724	down	coding	NM_000696	ALDH9A1	RefSeq_coding	2500	chr1	-	165631448	165667900		TTAAAATATGGAGTCAAAAATCTGGCATGGAGCGTTGCCGAATCCTTTTGGAGGCTGCCA	223	Hs.2533	GO:0004028|GO:0047105|GO:0051287|GO:0004029|GO:0043176|GO:0019145|GO:0016491|GO:0042803|GO:0045329|GO:0006081|GO:0034641|GO:0042445|GO:0001822|GO:0001889|GO:0042136|GO:0055114|GO:0005737|GO:0005737|GO:0005829|GO:0005739|GO:0005886	NP_000687	Aldehyde dehydrogenase 9 family, member A1	119.453	281.046	6.98198	8.05046
ASHG19A3A032022	-2.16799	-1.11636	2.16799	down	coding	NM_181795	PKIB	RefSeq_coding	1909	chr6	+	122931376	123047517	NM_181794,	AGTTTATCAGAATTTTTTAAACCTGTCTCAGAAATAACAACATATTTTAATCAGAGATTT	5570	Hs.726217	GO:0004862|GO:0004860|GO:0006469	NP_861460	Protein kinase (cAMP-dependent, catalytic) inhibitor beta	2312.16	5652.94	11.2654	12.3818
ASHG19A3A049595	-2.20862	-1.14315	2.20862	down	coding	NM_000677	ADORA3	RefSeq_coding	2261	chr1	-	112042052	112046743		GGGGACTTAAACTGCTGAATTCACCTGTGGATGTTTTTGAGTAAATAAAAGCTAATAGCT	140	Hs.281342	GO:0001609|GO:0004872|GO:0007190|GO:0006954|GO:0008016|GO:0009611|GO:0007165|GO:0005887|GO:0005886|GO:0005886	NP_065734	Adenosine A3 receptor	83.3917	205.416	6.45554	7.59869
ASHG19A3A001813	-2.08053	-1.05695	2.08053	down	coding	NM_001102397	HNRNPR	RefSeq_coding	2585	chr1	-	23636276	23670853		TTGGAAGAATTCAGTAAAGTCACAGAGGGTTTGGTGGACGTTATTCTCTATCATCAACCC	10236	Hs.373763	GO:0003723|GO:0000166|GO:0005515|GO:0008380|GO:0010467|GO:0006397|GO:0000398|GO:0000398|GO:0071013|GO:0005737|GO:0030530|GO:0005654|GO:0005634|GO:0030529	NP_005817	Heterogeneous nuclear ribonucleoprotein R	813.561	1912.8	9.7575	10.8145
ASHG19A3A006273	-2.6647	-1.41397	2.6647	down	coding	NM_170709	SGK3	RefSeq_coding	4059	chr8	+	67687461	67774255		TACCACATTTTGTGGGACACCAGAGCCTCCTTTTTATTGCCGAGATGTTGCTGAAATGTA	23678	Hs.613417		NP_733827	Serum/glucocorticoid regulated kinase family, member 3	495.082	1501.6	9.05135	10.4653
ASHG19A3A010695	-2.50502	-1.32483	2.50502	down	coding	NM_021127	PMAIP1	RefSeq_coding	1954	chr18	+	57567191	57571538		GTCTTAATGTAGGTTGTAGTCACTTTAGATGGAAAATTACCTCACATCTGTTTTCTTCAG	5366	Hs.96	GO:0005515|GO:0006919|GO:0008633|GO:0006915|GO:0006915|GO:0006921|GO:0042149|GO:0006917|GO:0008629|GO:0043065|GO:0010907|GO:0090200|GO:0046902|GO:0001836|GO:0043331|GO:0072332|GO:0006926|GO:0005829|GO:0005829|GO:0005741|GO:0005739|GO:0005634	NP_066950	Phorbol-12-myristate-13-acetate-induced protein 1	2273.06	6422.81	11.2404	12.5652
ASHG19A3A040124	-2.02889	-1.02069	2.02889	down	coding	NM_018060	IARS2	RefSeq_coding	3549	chr1	+	220267454	220321376		TCTCCTCTTTTACCTGCAAATCATGTGACCATGGCAAAAGGAACGGGATTGGTTCACACA	55699	Hs.262823	GO:0005524|GO:0004822|GO:0016874|GO:0000166|GO:0010467|GO:0006428|GO:0006418|GO:0005737|GO:0005759|GO:0005739	NP_060530	Isoleucyl-tRNA synthetase 2, mitochondrial	370.231	853.773	8.62663	9.64732
ASHG19A3A055039	-2.38371	-1.25321	2.38371	down	coding	NM_014389	PELP1	RefSeq_coding	3688	chr17	-	4574679	4607632		CCAGCCCTGGAAGAGGATTTGACAGTTATTAATATCAACAGCAGTGATGAAGAGGAGGAG	27043	Hs.513883	GO:0005515|GO:0071339|GO:0005737|GO:0005634	NP_055204	Proline, glutamate and leucine rich protein 1	77.1968	206.215	6.35045	7.60366
ASHG19A3A011681	-2.93857	-1.55512	2.93857	down	coding	NM_006179	NTF4	RefSeq_coding	999	chr19	-	49564398	49567124		TGGAGGTTGAATAGGAGTTCTCCTGGAGCAACTTGAGGGTAATAATGATGATGATATAAT	4909	Hs.266902	GO:0008083|GO:0008344|GO:0008544|GO:0007402|GO:0007616|GO:0008052|GO:0005788|GO:0005576	NP_006170	Neurotrophin 4	122.516	406.912	7.02077	8.57588
ASHG19A3A001219	-2.31123	-1.20866	2.31123	down	coding	NM_013257	SGK3	RefSeq_coding	4155	chr8	+	67687461	67774255	NM_170709,NM_001033578,	ACCTGGGACCGTCTGGAAATCCTCATGCCAAACCAACTGACTTTGATTTCTTAAAAGTTA	23678	Hs.613417		NP_733827	Serum/glucocorticoid regulated kinase family, member 3	483.885	1271.26	9.015	10.2237
ASHG19A3A010627	-5.61512	-2.48932	5.61512	down	coding	NM_213602	SIGLEC15	RefSeq_coding	1523	chr18	+	43405544	43422521		TGTTCCCTTGCCCTTTCTTACCTAGAACACCTGCTATAGTAAAGCAGACAGGAAACTGTT	284266	Hs.287692	GO:0016021|GO:0016020	NP_998767	Sialic acid binding Ig-like lectin 15	561.313	3540.46	9.22735	11.7167
ASHG19A3A004660	-2.34426	-1.22914	2.34426	down	coding	NM_012485	HMMR	RefSeq_coding	3096	chr5	+	162887516	162918949		CAGCTAGAAAAGTTAAGTCTTCGGAATCAAAGATTCGTGTTCTTCTACAGGAACGTGGTG	3161	Hs.728200	GO:0005540|GO:0009986|GO:0005737	NP_036617	Hyaluronan-mediated motility receptor (RHAMM)	128.882	340.981	7.09447	8.3236
ASHG19A3A011077	-2.90546	-1.53877	2.90546	down	coding	NM_001080821	ZNF799	RefSeq_coding	2549	chr19	-	12500830	12512034	NM_005815,	AATGAAATGGAAAGACCAGAACATTGAAGATCAATATAGATATCCCAGGAAAAATCTAAG	90576	Hs.546637	GO:0003677|GO:0046872|GO:0008270|GO:0006355|GO:0005622|GO:0005634	NP_001074290	Zinc finger protein 799	82.0954	265.857	6.43497	7.97374
ASHG19A3A001473	-2.00596	-1.00429	2.00596	down	coding	NM_001048218	SCYL1	RefSeq_coding	2616	chr11	+	65292547	65306182		ATTCCCCAAAGACCCACGCCTGAAGGCCACTGGGAGACGCAGGAGGAGGACAAGGACACA	57410	Hs.238839	GO:0005524|GO:0003677|GO:0005488|GO:0004713|GO:0006468|GO:0006890|GO:0016192|GO:0030126|GO:0005793|GO:0005794|GO:0005801|GO:0005737|GO:0005737|GO:0005856|GO:0005815|GO:0005634	NP_065731	SCY1-like 1 (S. cerevisiae)	194.607	440.591	7.68632	8.69061
ASHG19A3A004650	-2.47068	-1.30491	2.47068	down	coding	NM_012341	GTPBP4	RefSeq_coding	2537	chr10	+	1034348	1063704		GGATTATAAGTATCTACGTTGGCAGGTTGTAGACACTCCTGGGATCCTGGACCACCCTCT	23560	Hs.215766	GO:0005525|GO:0003924|GO:0000166|GO:0005515|GO:0006184|GO:0008156|GO:0030336|GO:0008285|GO:0022408|GO:0033342|GO:0031397|GO:0050821|GO:0000079|GO:0042254|GO:0005737|GO:0005730|GO:0005634|GO:0048471	NP_036473	GTP binding protein 4	346.327	968.811	8.52664	9.83155
ASHG19A3A054777	-2.16752	-1.11604	2.16752	down	coding	NM_014761	KIAA0174	RefSeq_coding	2377	chr16	+	71929445	71962906		TTCAATGGACTGCCAATGGGGACTTATCAGGCCTTTCCCAATATTCATCCACCTCAGATA	9798	Hs.232194	GO:0005515|GO:0007049|GO:0051301|GO:0005793|GO:0016023	NP_055576	KIAA0174	879.476	2155.01	9.86416	10.9802
ASHG19A3A009953	-2.23958	-1.16323	2.23958	down	coding	NM_001113324	C17orf106	RefSeq_coding	1007	chr17	+	73975300	73996665		AGAAACTGCCCTGCTGGGCGTCCGGGGAGTGGGAAAATAAAGCACTTTTTGTATCCCGCC	100134934	Hs.593566	GO:0003677|GO:0005515|GO:0070188|GO:0000784|GO:0005634	NP_001106795	Chromosome 17 open reading frame 106	68.252	171.188	6.17257	7.3358
ASHG19A3A000731	-2.00312	-1.00225	2.00312	down	coding	NM_001002876	CENPM	RefSeq_coding	855	chr22	-	42334748	42343148		TTGGGGAAGGTGTGTTTCCTCGCCACAGGTGGTGGAAGGCTTTAGGGCCACCATGGCGCA	79019	Hs.208912	GO:0000087|GO:0000278|GO:0000236|GO:0000777|GO:0005737|GO:0005829|GO:0005634	NP_076958	Centromere protein M	344.971	782.414	8.521	9.52325
ASHG19A3A001546	-4.6607	-2.22055	4.6607	down	coding	NM_001079539	XBP1	RefSeq_coding	1810	chr22	-	29190548	29196560		GTGGCCGGGTCTGCTGAGTCCGCAGCAGGTGCAGGCCCAGTTGTCACCCCTCCAGAACAT	7494	Hs.437638	GO:0003677|GO:0046983|GO:0043565|GO:0003700|GO:0006955|GO:0006355|GO:0006351|GO:0005634	NP_005071	X-box binding protein 1	4002.2	20843.1	12.0436	14.2642
ASHG19A3A050447	-3.66256	-1.87285	3.66256	down	coding	NM_000123	ERCC5	RefSeq_coding	4100	chr13	+	103498173	103528347		TTAGCACAGCAGAATTCACTGAAAGCTCAAAAACAGCAGCAAGAACGGATCGCTGCTACT	2073	Hs.258429	GO:0003677|GO:0000405|GO:0003690|GO:0004520|GO:0004519|GO:0046872|GO:0047485|GO:0005515|GO:0042803|GO:0003697|GO:0006281|GO:0009650|GO:0008340|GO:0035264|GO:0043066|GO:0006289|GO:0000718|GO:0006295|GO:0006295|GO:0009411|GO:0009411|GO:0010225|GO:0006283|GO:0006283|GO:0016591|GO:0005675|GO:0005654|GO:0005654|GO:0005634	NP_000114	Excision repair cross-complementing rodent repair deficiency, complementation group 5	103.048	424.659	6.76422	8.63707
ASHG19A3A019896	-2.21464	-1.14707	2.21464	down	coding	NM_014570	ARFGAP3	RefSeq_coding	2851	chr22	-	43192531	43253408		TGACACCAATGCCAAGTACAACAGTCGTGCTGCTCAGCTCTATAGGGAGAAAATCAAATC	26286	Hs.685225	GO:0008060|GO:0046872|GO:0008565|GO:0008270|GO:0006886|GO:0009306|GO:0032312|GO:0016192|GO:0005794|GO:0000139|GO:0005737|GO:0005829|GO:0016020	NP_055385	ADP-ribosylation factor GTPase activating protein 3	90.8824	223.921	6.5758	7.72288
ASHG19A3A010360	-2.08819	-1.06225	2.08819	down	coding	NM_004869	VPS4B	RefSeq_coding	3396	chr18	-	61056426	61089752		AATTTTGGTTCTGGGAGCTACAAATATACCCTGGGTTCTGGATTCTGCCATTAGGCGAAG	9525	Hs.126550	GO:0005524|GO:0016887|GO:0016887|GO:0042623|GO:0000166|GO:0008022|GO:0005515|GO:0006200|GO:0006200|GO:0007049|GO:0051301|GO:0016044|GO:0007032|GO:0032510|GO:0016197|GO:0016197|GO:0016197|GO:0032367|GO:0006813|GO:0015031|GO:0033993|GO:0005737|GO:0005829|GO:0005829|GO:0005769|GO:0005768|GO:0010008|GO:0005770|GO:0031902|GO:0005764|GO:0016020|GO:0005634|GO:0005774	NP_004860	Vacuolar protein sorting 4 homolog B (S. cerevisiae)	153.202	360.747	7.34393	8.40618
ASHG19A3A044169	-4.26907	-2.09392	4.26907	down	coding	NM_005729	PPIF	RefSeq_coding	2213	chr10	+	81107219	81115084		AATCCTATTTTCTATGGAAGACTGGTACCTGGTTTCTGGAAGAGGGGTCTGTGACTTGGA	10105	Hs.381072	GO:0016018|GO:0016853|GO:0003755|GO:0006457|GO:0042981|GO:0046902|GO:0005624|GO:0005743|GO:0005759|GO:0005739	NP_005720	Peptidylprolyl isomerase F	516.425	2510.14	9.10839	11.2023
ASHG19A3A047089	-2.03036	-1.02174	2.03036	down	coding	NM_001126181	NRGN	RefSeq_coding	1238	chr11	+	124609828	124617102		TGATCTCCGTGTGTGCATGTGACTGTGCTGGGTTGGAATGTGAACAATAAAGAGGAATGT	4900	Hs.524116	GO:0005516|GO:0007399|GO:0007165	NP_006167	Neurogranin (protein kinase C substrate, RC3)	2485.71	5676.02	11.3666	12.3883
ASHG19A3A009758	-2.4539	-1.29508	2.4539	down	coding	NM_021626	SCPEP1	RefSeq_coding	1952	chr17	+	55055467	55084127		ATTTGGAAACTTTGAGGAAATTGGGCCCCTTGACAGTGATCTCAAACCACGGAAAACCAC	59342	Hs.514950	GO:0008233|GO:0004185|GO:0006508|GO:0042573|GO:0005829|GO:0005576	NP_067639	Serine carboxypeptidase 1	173.485	481.361	7.5226	8.81768
ASHG19A3A039274	-3.80391	-1.92748	3.80391	down	coding	NM_005564	LCN2	RefSeq_coding	840	chr9	+	130911731	130915734		ATGCCACCATCTATGAGCTGAAAGAAGACAAGAGCTACAATGTCACCTCCGTCCTGTTTA	3934	Hs.204238	GO:0005488|GO:0005506|GO:0002020|GO:0042803|GO:0005215|GO:0070301|GO:0071347|GO:0071222|GO:0031669|GO:0071445|GO:0071356|GO:0045087|GO:0006811|GO:0006826|GO:0031346|GO:0010628|GO:0070207|GO:0042981|GO:0009617|GO:0042493|GO:0009635|GO:0006979|GO:0009615|GO:0015891|GO:0005829|GO:0005576|GO:0005615	NP_005555	Lipocalin 2	1371.99	5873.96	10.5094	12.4368
ASHG19A3A042623	-2.20149	-1.13848	2.20149	down	coding	NM_031866	FZD8	RefSeq_coding	3186	chr10	-	35927176	35930362		AATTCCCCTTAGGCCTTGTTATTTATCCTGCATGGTATCACTAAAGGTTTCAAAACCCTG	8325	Hs.302634	GO:0004930|GO:0030165|GO:0042813|GO:0042813|GO:0017147|GO:0033077|GO:0007409|GO:0007420|GO:0060070|GO:0009790|GO:0008406|GO:0030182|GO:0001934|GO:0010551|GO:0007165|GO:0001944|GO:0005794|GO:0042995|GO:0005737|GO:0016021|GO:0005886	NP_114072	Frizzled homolog 8 (Drosophila)	640.375	1592.04	9.41317	10.5516
ASHG19A3A000633	-2.44649	-1.29071	2.44649	down	coding	NM_000935	PLOD2	RefSeq_coding	4009	chr3	-	145787227	145879282		GCTCTTTGCCGAAATGCTAGAGAAATGGGTGTATTTATGTACATTTCTAATAGACATGAA	5352	Hs.477866	GO:0031418|GO:0005506|GO:0046872|GO:0016705|GO:0016702|GO:0008475|GO:0005515|GO:0055114|GO:0006464|GO:0001666|GO:0005783|GO:0016020|GO:0030867	NP_891988	Procollagen-lysine, 2-oxoglutarate 5-dioxygenase 2	641.22	1767.77	9.41488	10.7056
ASHG19A3A007875	-2.03609	-1.0258	2.03609	down	coding	NM_004217	AURKB	RefSeq_coding	1253	chr17	-	8108049	8113883		AATTGATGACTTTGAGATTGGGCGTCCTCTGGGCAAAGGCAAGTTTGGAAACGTGTACTT	9212	Hs.442658	GO:0005524|GO:0046872|GO:0000166|GO:0005515|GO:0004674|GO:0000087|GO:0007568|GO:0031145|GO:0008283|GO:0000910|GO:0000278|GO:0000236|GO:0034501|GO:0006468|GO:0005694|GO:0032133|GO:0000779|GO:0000780|GO:0005737|GO:0005856|GO:0005829|GO:0030496|GO:0005634|GO:0005819	NP_004208	Aurora kinase B	253.502	585.101	8.07035	9.09615
ASHG19A3A006202	-2.28929	-1.1949	2.28929	down	coding	NM_001135629	KLRAQ1	RefSeq_coding	3186	chr2	+	48667907	48742524	NM_152994,	ACAAGCAAATTCTGCAGCTTTAAAGGAGCAACTGAAAATGAAGGATCAGTCATTGAGAAA	129285	Hs.654619		NP_694539	KLRAQ motif containing 1	89.7232	228.88	6.55796	7.75286
ASHG19A3A012836	-2.42466	-1.27778	2.42466	down	coding	NM_005500	SAE1	RefSeq_coding	2538	chr19	+	47634079	47713892	NR_027280,	ATACGAAATGATGTGCTTGACTCACTGGGTATTAGTCCTGACCTGCTTCCTGAGGACTTT	10055	Hs.515500	GO:0043008|GO:0019948|GO:0008047|GO:0016874|GO:0008022|GO:0005515|GO:0046982|GO:0046982|GO:0004839|GO:0006464|GO:0016925|GO:0016567|GO:0005634	NP_005491	SUMO1 activating enzyme subunit 1	1602.11	4331.94	10.7306	12.0084
ASHG19A3A035586	-2.21559	-1.14769	2.21559	down	coding	NM_025232	REEP4	RefSeq_coding	1731	chr8	-	21995532	21999448		ATGCTGTGTCCAGCTTATGCTTCCTATAAGGCTGTGAAGACCAAGAACATTCGTGAATAT	80346	Hs.289063	GO:0016021|GO:0016020	NP_079508	Receptor accessory protein 4	94.9062	234.494	6.64035	7.78804
ASHG19A3A014870	-2.00043	-1.00031	2.00043	down	coding	NM_020919	ALS2	RefSeq_coding	6935	chr2	-	202564986	202645895		TTTTGCCAACCACGAAAGATGCTTGTTTTGCCTCAGCAGTAGAATGTCTGCAGCAGATCA	57679	Hs.471096	GO:0017137|GO:0017137|GO:0017112|GO:0030676|GO:0005087|GO:0005085|GO:0042803|GO:0043539|GO:0008219|GO:0007032|GO:0007032|GO:0048812|GO:0032855|GO:0035022|GO:0045860|GO:0071902|GO:0035023|GO:0051036|GO:0005813|GO:0005829|GO:0030425|GO:0005769|GO:0030426|GO:0005622|GO:0030027|GO:0043234|GO:0001726|GO:0042598	NP_065970	Amyotrophic lateral sclerosis 2 (juvenile)	113.208	253.119	6.90204	7.90235
ASHG19A3A029746	-2.07401	-1.05243	2.07401	down	coding	NM_004557	NOTCH4	RefSeq_coding	6762	chr6	-	32162620	32191844		CACTGCTATCGCTATTTAAGAACCCTAAATCTGTCACCCATAATAAAGCTGATTTGAAGT	4855	Hs.436100	GO:0005509|GO:0005515|GO:0046982|GO:0004872|GO:0007220|GO:0007219|GO:0030154|GO:0001709|GO:0009790|GO:0001886|GO:0010467|GO:0030097|GO:0030879|GO:0001763|GO:0045596|GO:0045602|GO:0001569|GO:0045893|GO:0050793|GO:0005796|GO:0009986|GO:0005829|GO:0005788|GO:0005576|GO:0005887|GO:0005654|GO:0005634|GO:0005886	NP_004548	Notch 4	262.879	619.22	8.12362	9.17605
ASHG19A3A004430	-2.11933	-1.08361	2.11933	down	coding	NM_005724	TSPAN3	RefSeq_coding	3871	chr15	-	77336361	77363570		GGAAAGTCGCTGTGGACTTGCCACGTTTGTCATCATCCTGCTCTTGGTTTTTGTCACAGA	10099	Hs.728882	GO:0016021|GO:0016020	NP_944492	Tetraspanin 3	661.728	1584.02	9.46083	10.5444
ASHG19A3A009643	-2.01628	-1.01169	2.01628	down	coding	NM_033413	LRRC46	RefSeq_coding	1444	chr17	+	45909099	45914690		GAAGAAACCAGTGAAAGCTCCAGGAAACAAAATACAGAGCTCAGTGAGCCACCTGATTCT	90506	Hs.130767		NP_219481	Leucine rich repeat containing 46	288.509	658.419	8.25918	9.27088
ASHG19A3A024737	-8.54401	-3.09491	8.54401	down	coding	NM_001114734	PABPC4L	RefSeq_coding	4944	chr4	-	135117490	135122903		GTCTGCTGTGTAGTTACCTGCTTACATGTACAGCCATTTCAATAAATGTATTCTTTTAAC	132430	Hs.49889	GO:0003723|GO:0000166	NP_001108206	Poly(A) binding protein, cytoplasmic 4-like	1436.09	13686.1	10.5746	13.6695
ASHG19A3A054982	-2.1621	-1.11243	2.1621	down	coding	NM_006996	SLC19A2	RefSeq_coding	3655	chr1	-	169433150	169455208		AGTATTTGGTGTAAATACCTTCATTGCCCTGGCACTGCAGACGCTGCTCACTCTAATTGT	10560	Hs.30246	GO:0005542|GO:0008517|GO:0008518|GO:0015234|GO:0015403|GO:0015884|GO:0071934|GO:0015888|GO:0042723|GO:0006810|GO:0006766|GO:0006767|GO:0016021|GO:0005886	NP_008927	Solute carrier family 19 (thiamine transporter), member 2	313.01	765.344	8.38	9.49243
ASHG19A3A025168	-2.25879	-1.17555	2.25879	down	coding	NM_133334	WHSC1	RefSeq_coding	8390	chr4	+	1902352	1950545		AGTGGAAACGTGCTAACTTTTTCTGTAAATCTGAAATAAAAGGTGCTGTTCCTTCCTCTG	7468	Hs.113876	GO:0003677|GO:0003682|GO:0018024|GO:0046872|GO:0008168|GO:0016740|GO:0008270|GO:0009653|GO:0003289|GO:0003290|GO:0060348|GO:0016568|GO:0003149|GO:0000122|GO:0005694|GO:0005737|GO:0031965|GO:0005730|GO:0005634	NP_579890	Wolf-Hirschhorn syndrome candidate 1	1706.14	4306.74	10.8233	11.9988
ASHG19A3A030584	-2.16816	-1.11647	2.16816	down	coding	NM_005923	MAP3K5	RefSeq_coding	5215	chr6	-	136878187	137113656		AATGGCCACAGGAAAACCCCCATTTTATGAACTGGGAGAACCACAAGCAGCTATGTTCAA	4217	Hs.186486	GO:0005524|GO:0004709|GO:0008656|GO:0042802|GO:0000287|GO:0000166|GO:0005515|GO:0042803|GO:0019903|GO:0004674|GO:0000165|GO:0007257|GO:0000186|GO:0006915|GO:0008624|GO:0044419	NP_005914	Mitogen-activated protein kinase kinase kinase 5	93.0309	225.076	6.61251	7.72898
ASHG19A3A043845	-2.14956	-1.10404	2.14956	down	coding	NM_020975	RET	RefSeq_coding	5629	chr10	+	43572516	43625795		CCCATCCTTATTAGCTCTACTGGAATTTTCATACACGTAAATGCAGAAGTTACTAAGTAT	5979	Hs.350321	GO:0005524|GO:0005509|GO:0000166|GO:0004713|GO:0004872|GO:0016740|GO:0004714|GO:0000165|GO:0001838|GO:0048484|GO:0007156|GO:0007399|GO:0001755|GO:0042551|GO:0007497|GO:0006468|GO:0007165|GO:0007169|GO:0001657|GO:0016021|GO:0016020	NP_066124	Ret proto-oncogene	13973.3	32866.7	13.841	14.945
ASHG19A3A015402	-2.28161	-1.19005	2.28161	down	coding	NM_052960	RBP7	RefSeq_coding	704	chr1	+	10057254	10076077		TTGGTTATCTGGGACAATGACAGGCTCACCTGTATCCAGAAGGGAGAAAAGAAGAACAGA	116362	Hs.422688	GO:0008289|GO:0016918|GO:0019841|GO:0005215|GO:0005737	NP_443192	Retinol binding protein 7, cellular	270.785	697.572	8.16753	9.35758
ASHG19A3A015107	-2.5915	-1.37379	2.5915	down	coding	NM_005381	NCL	RefSeq_coding	2732	chr2	-	232319459	232329205		ACTACACCAGCCAAAGGAAAGAAAGCTGCAAAAGTTGTTCCTGTGAAAGCCAAGAACGTG	4691	Hs.79110	GO:0003677|GO:0003723|GO:0000166|GO:0008022|GO:0005515|GO:0042162|GO:0001525|GO:0005938|GO:0005737|GO:0005730|GO:0005654|GO:0005634|GO:0030529	NP_005372	Nucleolin	743.339	2191.5	9.62832	11.0021
ASHG19A3A023091	-2.28257	-1.19066	2.28257	down	coding	NM_014367	FAM162A	RefSeq_coding	838	chr3	+	122103022	122128960		ATTTGAAGAGAATAAATGGATTTTGCACAAAACCACAGGAAAGTCCCGGAGCTCCATCCC	26355	Hs.584881	GO:0016021|GO:0016020|GO:0005739	NP_055182	Family with sequence similarity 162, member A	3351.98	8461	11.7819	12.9725
ASHG19A3A004773	-4.39921	-2.13725	4.39921	down	coding	NM_014861	ATP2C2	RefSeq_coding	3403	chr16	+	84402132	84497792		CAACGCCTTGACCTGCCGCTCTCAGACCAAGCTGATATTTGAGATCGGCTTTCTCAGGAA	9914	Hs.6168	GO:0005524|GO:0005388|GO:0016787|GO:0016820|GO:0046872|GO:0000166|GO:0005515|GO:0006754|GO:0006816|GO:0006812|GO:0034220|GO:0034220|GO:0055085|GO:0000139|GO:0016021|GO:0016020	NP_055676	ATPase, Ca++ transporting, type 2C, member 2	417.204	2090.1	8.79948	10.9367
ASHG19A3A041322	-2.02682	-1.01922	2.02682	down	coding	NM_052843	OBSCN	RefSeq_coding	20431	chr1	+	228395860	228548950		ACAGGGTCTGTGTGTGGGCAGCAGCCCCTGTCTCTCAGCAAGAATAAAGCAGCTTCCTGT	84033	Hs.656999	GO:0005524|GO:0005089|GO:0005085|GO:0046872|GO:0000166|GO:0005515|GO:0004674|GO:0004713|GO:0008307|GO:0031432|GO:0016740|GO:0006915|GO:0030154|GO:0008624|GO:0007275|GO:0048011|GO:0006468|GO:0035023|GO:0051056|GO:0007264|GO:0031430|GO:0030018|GO:0005737|GO:0005829|GO:0005829|GO:0005622|GO:0030016|GO:0030017	NP_443075	Obscurin, cytoskeletal calmodulin and titin-interacting RhoGEF	307.34	705.658	8.35549	9.37471
ASHG19A3A023090	-3.3243	-1.73305	3.3243	down	coding	NM_005213	CSTA	RefSeq_coding	838	chr3	+	122044010	122060813		TTCACTTTGGTTCCAGCATCCTGTCCAGCAAAGAAGCAATCAGCCAAAATGATACCTGGA	1475	Hs.518198	GO:0004869|GO:0002020|GO:0030674|GO:0005198|GO:0030216|GO:0010466|GO:0018149|GO:0001533|GO:0005737|GO:0005622|GO:0005634	NP_005204	Cystatin A (stefin A)	164.53	619.437	7.44428	9.17733
ASHG19A3A021649	-2.51056	-1.32801	2.51056	down	coding	NM_016216	DBR1	RefSeq_coding	2667	chr3	-	137879852	137893773		AAACCTACTTATTGGTTTTCTGCCCACCTTCATGTGAAGTTTGCCGCCTTGATGCAGCAT	51163	Hs.477700	GO:0008419|GO:0016788|GO:0046872|GO:0000375|GO:0000398|GO:0005634	NP_057300	Debranching enzyme homolog 1 (S. cerevisiae)	247.48	700.249	8.03478	9.36279
ASHG19A3A013212	-2.20444	-1.14041	2.20444	down	coding	NM_003310	TSSC1	RefSeq_coding	1732	chr2	-	3192740	3381653		AATCATTTCCTTGGCTGATAACCATATCCTGCTGTGGGATTTACAGGAAAGCTCGAGCCA	7260	Hs.502770	GO:0005515	NP_003301	Tumor suppressing subtransferable candidate 1	584.095	1455.32	9.28234	10.4227
ASHG19A3A047307	-2.21471	-1.14712	2.21471	down	coding	NM_197954	CLEC7A	RefSeq_coding	519	chr12	-	10279923	10282868		CGGAGCTGAAGAAGAAAGTACAATATGGTGCTGTCTTCCTAATGAAATAAATTCACTAAA	64581	Hs.143929	GO:0001874|GO:0042287|GO:0005488|GO:0001846|GO:0008329|GO:0005529|GO:0042110|GO:0009756|GO:0008037|GO:0002752|GO:0016337|GO:0042832|GO:0001879|GO:0006954|GO:0045087|GO:0002221|GO:0006911|GO:0006910|GO:0050766|GO:0032760|GO:0002238|GO:0005737|GO:0009897|GO:0016021|GO:0016020	NP_922945	C-type lectin domain family 7, member A	65.6806	162.757	6.11698	7.2641
ASHG19A3A012848	-2.57181	-1.36278	2.57181	down	coding	NM_015710	GLTSCR2	RefSeq_coding	1523	chr19	+	48248792	48260323		TTGTTGTCAGAGGCCCCAAATGAAAAACTCTTCTTCGTGGACACTGGCTCCAAGGAAAAA	29997	Hs.421907	GO:0003674|GO:0008150|GO:0005622|GO:0043231|GO:0005730|GO:0005634	NP_056525	Glioma tumor suppressor candidate region gene 2	417.283	1214.81	8.80011	10.1629
ASHG19A3A018554	-3.4378	-1.78149	3.4378	down	coding	NM_001853	COL9A3	RefSeq_coding	2485	chr20	+	61448413	61472510		GTTGTGTACAACTCCACGAGGTGAAAAATATTCAGTAACTTGTTTACATAGCATTTGTGT	1299	Hs.716639	GO:0030020|GO:0007411|GO:0005594|GO:0005576|GO:0005578	NP_001844	Collagen, type IX, alpha 3	414.475	1616.17	8.78907	10.5706
ASHG19A3A001052	-2.06902	-1.04895	2.06902	down	coding	NM_001018055	BRCC3	RefSeq_coding	2839	chrX	+	154299709	154351348		CCATACAGGCCCAAAAGAGTTCAGAGTATGAGAGAATCGAAATCCCAATCCATATTGTAC	79184	Hs.558537	GO:0030234|GO:0046872|GO:0008237|GO:0008233|GO:0031593|GO:0005515|GO:0004221|GO:0004843|GO:0031572|GO:0016568|GO:0006302|GO:0070537|GO:0070537|GO:0045739|GO:0070536|GO:0050790|GO:0006974|GO:0010165|GO:0010212|GO:0070531|GO:0070552|GO:0000152|GO:0005634|GO:0000151	NP_077308	BRCA1/BRCA2-containing complex, subunit 3	154.58	360.469	7.35591	8.40486
ASHG19A3A030862	-2.48147	-1.3112	2.48147	down	coding	NM_005618	DLL1	RefSeq_coding	3366	chr6	-	170591295	170599697		ACTCCGGCTTCAACTGTGAGAAGAAAATTGACTACTGCAGCTCTTCACCCTGTTCTAATG	28514	Hs.379912	GO:0005112|GO:0005509|GO:0005515|GO:0007220|GO:0007219|GO:0007219|GO:0007154|GO:0030154|GO:0001709|GO:0007386|GO:0007368|GO:0030097|GO:0048839|GO:0007275|GO:0045608|GO:0045596|GO:0030155|GO:0001757|GO:0031410|GO:0005576|GO:0005887|GO:0005886	NP_005609	Delta-like 1 (Drosophila)	93.8047	259.552	6.62433	7.93552
ASHG19A3A015427	-3.53817	-1.823	3.53817	down	coding	NM_020134	DPYSL5	RefSeq_coding	5225	chr2	+	27070968	27173218		CTAAACAGCCCGACACGTTGTGTTCTGGTGCAGGTTTGTATTAAACTGTAGCTACTTCTC	56896	Hs.299315	GO:0016810|GO:0007411|GO:0007399|GO:0007165|GO:0005737|GO:0005829	NP_064519	Dihydropyrimidinase-like 5	183.631	733.825	7.60513	9.42813
ASHG19A3A044880	-2.98146	-1.57602	2.98146	down	coding	NM_012402	ARFIP2	RefSeq_coding	2596	chr11	-	6496927	6502595		TCGGGGCATTGCTGGAGAAAAGTTTGACATCGTCAAGAAATGGGGCATCAACACCTATAA	23647	Hs.75139	GO:0005525|GO:0030742|GO:0030742|GO:0048365|GO:0005515|GO:0030036|GO:0006928|GO:0030032|GO:0031529|GO:0007264|GO:0005938|GO:0005737|GO:0005886|GO:0001726|GO:0005625	NP_036534	ADP-ribosylation factor interacting protein 2	137.361	462.799	7.1834	8.75942
ASHG19A3A041581	-2.04745	-1.03383	2.04745	down	coding	NM_001145036	COG2	RefSeq_coding	2974	chr1	+	230778201	230829730		AAGATCATCCAGGATTTAAGTGACTCTTGCTTCGGTTTCCTAAAAAGCGCCCTGGAGGTT	22796	Hs.211800	GO:0005515|GO:0008565|GO:0007030|GO:0006891|GO:0006886|GO:0009312|GO:0006486|GO:0015031|GO:0005794|GO:0000139|GO:0005795|GO:0017119|GO:0017119|GO:0016020	NP_031383	Component of oligomeric golgi complex 2	549.802	1279.01	9.19939	10.2332
ASHG19A3A048568	-2.66774	-1.41562	2.66774	down	coding	NM_023071	SPATS2	RefSeq_coding	3796	chr12	+	49760687	49921207		TTACAAGTGCTAACAAGAAAAACTTTGCACCGGGAGAGACTCCTGCAGCCATAGCAAACT	65244	Hs.654826	GO:0005737	NP_075559	Spermatogenesis associated, serine-rich 2	307.216	929.935	8.35505	9.77067
ASHG19A3A017595	-2.5416	-1.34574	2.5416	down	coding	NM_000178	GSS	RefSeq_coding	1918	chr20	-	33516236	33543601		ACGAACATTTGAAGATATCTCTGAAAAGGGGTCTCTGGACCAAGACCGAAGGCTGTTTGT	2937	Hs.82327	GO:0005524|GO:0043295|GO:0004363|GO:0016594|GO:0016874|GO:0000287|GO:0000166|GO:0042803|GO:0007568|GO:0006520|GO:0006750|GO:0007399|GO:0043200|GO:0046686|GO:0031667|GO:0006979|GO:0034612|GO:0009410|GO:0006805|GO:0005829|GO:0005625	NP_000169	Glutathione synthetase	264.152	757.024	8.12982	9.47556
ASHG19A3A009437	-2.02066	-1.01483	2.02066	down	coding	NM_001488	TADA2A	RefSeq_coding	1886	chr17	+	35767311	35837224	NM_001166105,	TCCGAAGGGAAATCAAGAGGCTCCAAGAATACAGGACAGCAGGCATTACCAATTTTTGTA	6871	Hs.500066	GO:0003677|GO:0004402|GO:0003700|GO:0003712|GO:0008270|GO:0043966|GO:0006366|GO:0000125|GO:0005694|GO:0005634	NP_597683	Transcriptional adaptor 2A	74.346	168.269	6.29464	7.30946
ASHG19A3A004614	-3.67903	-1.87932	3.67903	down	coding	NM_007363	NONO	RefSeq_coding	3114	chrX	+	70503041	70521016		TTTGCTGTCTGCAATCGAAGTTGAGGGTGCAAAAATGCAGAGTAATAAAACTTTTAACTT	4841	Hs.533282	GO:0003677|GO:0003723|GO:0042802|GO:0000166|GO:0005515|GO:0006310|GO:0006281|GO:0008380|GO:0006397|GO:0016363|GO:0005634|GO:0042382	NP_031389	Non-POU domain containing, octamer-binding	100.067	414.318	6.71954	8.59886
ASHG19A3A009848	-2.37703	-1.24916	2.37703	down	coding	NM_182641	BPTF	RefSeq_coding	10914	chr17	+	65821779	65980493		GAAATTAAGCGTGAACACACCCTCCAAGCTTCTAATCAAAGTGAAATCATTCAGAAACAG	2186	Hs.444200	GO:0008094|GO:0046872|GO:0005515|GO:0043565|GO:0043565|GO:0008134|GO:0030528|GO:0008270|GO:0007420|GO:0006338|GO:0000122|GO:0043193|GO:0016589|GO:0005737|GO:0005730|GO:0005634	NP_872579	Bromodomain PHD finger transcription factor	227.349	610.806	7.91052	9.15968
ASHG19A3A031543	-2.07199	-1.05102	2.07199	down	coding	NM_057161	KLHDC3	RefSeq_coding	1879	chr6	+	42981976	42989029		TTTGGTGGTTATAATGCAAGGCTGAACCGGCACTTCCATGACCTCTGGAAGTTTAATCCT	116138	Hs.412468	GO:0003682|GO:0005515|GO:0007126|GO:0007131|GO:0005737|GO:0000790	NP_476502	Kelch domain containing 3	282.76	663.571	8.23013	9.28115
ASHG19A3A041630	-6.03085	-2.59236	6.03085	down	coding	NM_145662	SPANXA2	RefSeq_coding	420	chrX	+	140677834	140678898	NM_145665,NM_032417,NM_022661,NM_013453,	AAAGTAGCAAGAAGCTACATCTCTCAACCTTGGGCAATGAAAATAAAGTTTGAGAAGCTG	728712	Hs.711784	GO:0007283|GO:0005737|GO:0005634	NP_663695	SPANX family, member A2	93.0101	630.644	6.61193	9.20429
ASHG19A3A048641	-3.1468	-1.65389	3.1468	down	coding	NM_012291	ESPL1	RefSeq_coding	6641	chr12	+	53662082	53687427		ATGTCCTGAACCCTCACAATAACCTGTCAAGCACAGAGGAGCAATTTCGAGCCAATTTCA	9700	Hs.153479	GO:0003824|GO:0008234|GO:0008233|GO:0005515|GO:0006915|GO:0007059|GO:0000910|GO:0040001|GO:0008152|GO:0000070|GO:0045875|GO:0045842|GO:0006508|GO:0005813|GO:0005737|GO:0005634	NP_036423	Extra spindle pole bodies homolog 1 (S. cerevisiae)	1074.93	3774.78	10.154	11.8079
ASHG19A3A032038	-2.37934	-1.25056	2.37934	down	coding	NM_012259	HEY2	RefSeq_coding	2672	chr6	+	126070731	126082414		CTGAAATATTGCAAATGACAGTGGATCATTTGAAGATGCTTCAGGCAACAGGGGGTAAAG	23493	Hs.144287	GO:0003677|GO:0042826|GO:0003700|GO:0016564|GO:0007275|GO:0045746|GO:0010629|GO:0010553|GO:0000122|GO:0007399|GO:0009887|GO:0060045|GO:0006355|GO:0006351|GO:0001570|GO:0005634	NP_036391	Hairy/enhancer-of-split related with YRPW motif 2	70.6798	188.345	6.22206	7.47263
ASHG19A3A004132	-2.62016	-1.38966	2.62016	down	coding	NM_003315	DNAJC7	RefSeq_coding	2096	chr17	-	40128438	40169715		TGCTCGACGACCAAGAGGCGAAGAGGGAAGCAGAGACTTTCAAGGAACAAGGAAATGCAT	7266	Hs.500156	GO:0005488|GO:0031072|GO:0051082|GO:0070389|GO:0006457|GO:0005737|GO:0005856|GO:0005730|GO:0005634	NP_003306	DnaJ (Hsp40) homolog, subfamily C, member 7	86.5793	252.199	6.50789	7.89755
CUST_8_PI426249100	-2.46805	-1.30337	2.46805	down	coding	NM_017409_Exon2+	NM_017409	HOX cluster	1108	chr12	+	54382952	54384060	NM_017409,	TCCCTGTCTGGGAGTTGTGTTATTTAAAGATATTCTGTATGTTGTATCTTTTGCATGTAG						516.819	1447.49	9.10902	10.4124
ASHG19A3A047472	-2.42189	-1.27613	2.42189	down	coding	NM_005748	YAF2	RefSeq_coding	4096	chr12	-	42550908	42632050		GGTAAATGGTCTAGAAGTTTTCGTTTCCACTGAGGCTTCCGCCACTCGCTTTTTTAAACT	10138	Hs.708084	GO:0046872|GO:0005515|GO:0003713|GO:0003714|GO:0008270|GO:0005737|GO:0005622|GO:0005730|GO:0005634	NP_005739	YY1 associated factor 2	91.498	246.863	6.58622	7.86236
ASHG19A3A003495	-2.00013	-1.00009	2.00013	down	coding	NM_001169106	FAM21C	RefSeq_coding	4531	chr10	+	46222647	46288411		TTCAGCTCTGCCAAGTCCCAGCCTTTGGCAAATTTAGCGATCAACCCAGCGGCCTTGCTG	253725	Hs.365286	GO:0005515|GO:0042147|GO:0006810|GO:0071203|GO:0005769|GO:0031901|GO:0005886	NP_056077	Family with sequence similarity 21, member C	193.813	437.614	7.68157	8.68166
ASHG19A3A001725	-2.32008	-1.21418	2.32008	down	coding	NM_001099406	SLC39A6	RefSeq_coding	1681	chr18	-	33690962	33709357		CGTGGGACAACGAGGCCGCGGAGACTGTTTCAATGCATCAAAGCTACTGACATCTCATGG	25800	Hs.729034	GO:0046873|GO:0005385|GO:0006811|GO:0055085|GO:0071577|GO:0071577|GO:0005783|GO:0016021|GO:0031258|GO:0005886|GO:0005886	NP_036451	Solute carrier family 39 (zinc transporter), member 6	1187.76	3098.59	10.3018	11.516
ASHG19A3A046146	-2.30046	-1.20192	2.30046	down	coding	NM_014633	CTR9	RefSeq_coding	4324	chr11	+	10772810	10801291		TTCTATAAGCACCAAAACACTGAAGTTGTACTCTATTTGGCCCGGGCCCTCTTCAAGTGT	9646	Hs.725151	GO:0042169|GO:0005515|GO:0033523|GO:0010390|GO:0016593|GO:0016607|GO:0005634	NP_055448	Ctr9, Paf1/RNA polymerase II complex component, homolog (S. cerevisiae)	68.2394	175.955	6.17241	7.37433
CUST_20_PI426249100	-2.09053	-1.06387	2.09053	down	coding	NM_014620_Exon4+	NM_014620	HOX cluster	1180	chr12	+	54448633	54449813	NM_153633,NM_014620,	ATTTTAGTGTCGATGTGAAATGCCCCGTGATCAATAATAAACCAGTGGATGTGAATTAGT						813.311	1920.59	9.75693	10.8208
ASHG19A3A012399	-2.05392	-1.03838	2.05392	down	coding	NM_004864	GDF15	RefSeq_coding	1220	chr19	+	18496967	18499986		GCTGGTCTGATGGAACTGTGTATTTATTTAAAACTCTGGTGATAAAAATAAAGCTGTCTG	9518	Hs.616962	GO:0005125|GO:0008083|GO:0007267|GO:0007165|GO:0007179|GO:0005576|GO:0005615	NP_004855	Growth differentiation factor 15	13738.5	30861.6	13.8207	14.859
ASHG19A3A012349	-3.35338	-1.74562	3.35338	down	coding	NM_032855	HSH2D	RefSeq_coding	2369	chr19	+	16244837	16269375		ATAAAGATGTTTTTGGGGTCTGTTCCTGCACTCACCCATGGGGTGAGCTGGTTATTTTAG	84941	Hs.631617	GO:0005070|GO:0042110|GO:0005737|GO:0005634	NP_116244	Hematopoietic SH2 domain containing	645.636	2459.17	9.42645	11.1721
ASHG19A3A013065	-2.24531	-1.16691	2.24531	down	coding	NM_001136137	RPL28	RefSeq_coding	682	chr19	+	55897299	55899087		GCAGCTTTCTGGCATGAGAAAGGAGTGTTTTCATGGTGGACAGAATTGGGCTATGAGTGT	6158	Hs.652114	GO:0003723|GO:0005515|GO:0003735|GO:0044267|GO:0031018|GO:0010467|GO:0006412|GO:0006414|GO:0006415|GO:0019058|GO:0016032|GO:0019083|GO:0005829|GO:0005829|GO:0022625|GO:0005622|GO:0005840	NP_001129609	Ribosomal protein L28	407.983	1036.7	8.76715	9.93406
ASHG19A3A053197	-2.92578	-1.54882	2.92578	down	coding	NM_002605	PDE8A	RefSeq_coding	3931	chr15	+	85525204	85682370		GGGCTATCAGTCAGGTGAATTAATAGGGAAGGAGTTAGGAGAAGTGCCTATAAATGAAAA	5151	Hs.9333	GO:0004115|GO:0004114|GO:0016787|GO:0046872|GO:0008081|GO:0000156|GO:0009187|GO:0006355|GO:0005575|GO:0005829	NP_775656	Phosphodiesterase 8A	69.5803	228.17	6.20037	7.74919
ASHG19A3A040060	-2.10898	-1.07655	2.10898	down	coding	NM_001166420	HDAC8	RefSeq_coding	1125	chrX	-	71787432	71792953		CTGACTCTTTCCTTGAGTCAGTTTCTCAGTTATGTAAACTCTTATGCTTATTGTATTGAC	55869	Hs.310536	GO:0032041|GO:0046969|GO:0046970|GO:0004407|GO:0034739|GO:0016787|GO:0046872|GO:0008134|GO:0006333|GO:0016568|GO:0016575|GO:0000122|GO:0005737|GO:0000118|GO:0000228|GO:0005634	NP_060956	Histone deacetylase 8	146.155	347.788	7.27333	8.34988
ASHG19A3A046875	-3.45074	-1.7869	3.45074	down	coding	NM_002033	FUT4	RefSeq_coding	6063	chr11	+	94277016	94283062		CATGTCAAGATGTCAAGTCATTTTTGAATGTGTCTCAGGGATTTCTATGCTACACATTCT	2526	Hs.390420	GO:0046920|GO:0008417|GO:0016757|GO:0042355|GO:0005975|GO:0006486|GO:0005794|GO:0032580|GO:0009986|GO:0016021|GO:0016020|GO:0005624	NP_002024	Fucosyltransferase 4 (alpha (1,3) fucosyltransferase, myeloid-specific)	956.678	3683.16	9.98659	11.7735
ASHG19A3A017009	-2.54688	-1.34873	2.54688	down	coding	NM_001173476	SPEG	RefSeq_coding	1449	chr2	+	220325533	220331583		GAGCGTGGAGAAATTTGGAAACACCTATTTCTTAACTCAAATAAAGTCCAGTTTGTACCT	10290	Hs.21639	GO:0005524|GO:0000166|GO:0004674|GO:0016740|GO:0042692|GO:0007517|GO:0008285|GO:0006468|GO:0005634	NP_005867	SPEG complex locus	903.204	2593.23	9.90249	11.2512
ASHG19A3A035057	-2.15436	-1.10726	2.15436	down	coding	NM_020704	FAM40B	RefSeq_coding	5115	chr7	+	129074273	129128237		CCAGTCTCCAATGGTGATTACTTTTACTACATAGAAAAACATTTTAGTGACTTACAGAGG	57464	Hs.489988	GO:0003674|GO:0008150|GO:0005575	NP_065755	Family with sequence similarity 40, member B	344.254	841.045	8.51771	9.62497
ASHG19A3A048815	-2.1209	-1.08468	2.1209	down	coding	NM_018448	CAND1	RefSeq_coding	5956	chr12	+	67663060	67708388		AAGTTGGCTATGTGACCCTGATGCAATGGAGCAGGGAGAAACACCTTTAACAATGCTTCA	55832	Hs.546407	GO:0017025|GO:0005515|GO:0016563|GO:0030154|GO:0043086|GO:0045899|GO:0016567|GO:0005634|GO:0000151	NP_060918	Cullin-associated and neddylation-dissociated 1	468.907	1125.18	8.96708	10.0518
ASHG19A3A022034	-2.07771	-1.05499	2.07771	down	coding	NM_001025266	C3orf70	RefSeq_coding	5901	chr3	-	184795839	184870802		CTACAGACAGCTCAACTTTCCTTGATATGTAACACTTTAGGAAAATAACTGCCTTGTAAA	285382	Hs.380048		NP_001020437	Chromosome 3 open reading frame 70	359.772	848.744	8.58521	9.64021
ASHG19A3A054334	-2.35525	-1.23588	2.35525	down	coding	NM_016946	F11R	RefSeq_coding	4830	chr1	-	160965001	160991133	AF191495,	ACCTTCTGAATACACCTGGTTCAAAGATGGGATAGTGATGCCTACGAATCCCAAAAGCAC	50848	Hs.517293	GO:0007596|GO:0007155|GO:0034329|GO:0045216|GO:0030855|GO:0006954|GO:0044419|GO:0050900|GO:0070830|GO:0005911|GO:0016021|GO:0005886|GO:0005886|GO:0005923	NP_058642	F11 receptor	445.545	1189.8	8.89755	10.1334
ASHG19A3A031026	-2.10998	-1.07723	2.10998	down	coding	NM_001143942	RBM24	RefSeq_coding	2467	chr6	+	17281808	17294097		ACACGACCCAGAAGGACACGACGTACACCAAGATCTTCGTCGGGGGGCTGCCCTACCACA	221662	Hs.726008	GO:0003723|GO:0003730|GO:0000166|GO:0043488|GO:0010830|GO:0005737|GO:0005634	NP_694565	RNA binding motif protein 24	68.3224	161.118	6.17385	7.25108
ASHG19A3A032437	-2.27226	-1.18413	2.27226	down	coding	NM_001134335	EIF2AK1	RefSeq_coding	4462	chr7	-	6061879	6098860		TCAGCACCCCAATATTGTTGGCTATCACACCGCGTGGATAGAACATGTTCATGTGATTCA	27102	Hs.728827	GO:0005524|GO:0004694|GO:0020037|GO:0000166|GO:0042803|GO:0016740|GO:0008285|GO:0046986|GO:0017148|GO:0045993|GO:0046777|GO:0046501|GO:0010999|GO:0009605|GO:0006950|GO:0005737	NP_055228	Eukaryotic translation initiation factor 2-alpha kinase 1	358.613	924.543	8.57946	9.7636
ASHG19A3A045661	-2.25932	-1.17589	2.25932	down	coding	NM_004153	ORC1L	RefSeq_coding	3180	chr1	-	52838501	52870131		AGCCCACTCAATGGAAGCTGTGGATGAGATGTTTTCATCATCATACATCACGGCCATCAA	4998	Hs.17908	GO:0005524|GO:0003677|GO:0017111|GO:0000166|GO:0005515|GO:0006260|GO:0006270|GO:0000082|GO:0000216|GO:0000084|GO:0000075|GO:0000278|GO:0000083|GO:0005737|GO:0005829|GO:0005664|GO:0005730|GO:0005654|GO:0005654|GO:0005634|GO:0000808|GO:0005886	NP_004144	Origin recognition complex, subunit 1	237.747	607.378	7.97474	9.15063
ASHG19A3A047729	-2.47765	-1.30897	2.47765	down	coding	NM_006400	DCTN2	RefSeq_coding	1757	chr12	-	57924093	57940978		ATTGTCAATCCTAATGCTGCCTATGACAAGTTCAAGGACAAGAGAGTGGGGACAAAGGGA	10540	Hs.289123	GO:0003774|GO:0005515|GO:0000086|GO:0008283|GO:0007017|GO:0007067|GO:0000278|GO:0007052|GO:0005813|GO:0005737|GO:0005856|GO:0005829|GO:0005869|GO:0030286|GO:0030426|GO:0000776|GO:0016020|GO:0005874	NP_006391	Dynactin 2 (p50)	508.992	1433.51	9.0876	10.3966
ASHG19A3A045293	-2.67088	-1.41732	2.67088	down	coding	NM_000738	CHRM1	RefSeq_coding	2863	chr11	-	62676151	62689012		TGTTCTTTCCTTTCATCCTCAGCAAGTGCTGAGTCTGTGAATAAAGCCACATAACCAGCG	1128	Hs.632119	GO:0004930|GO:0008144|GO:0004981|GO:0004435|GO:0005515|GO:0004872|GO:0007186|GO:0007207|GO:0007205|GO:0008283|GO:0007213|GO:0007399|GO:0007274|GO:0008284|GO:0006464|GO:0040012|GO:0007165|GO:0032279|GO:0043679|GO:0030054|GO:0030425|GO:0005887|GO:0005624|GO:0005886|GO:0005886|GO:0014069|GO:0045211	NP_000729	Cholinergic receptor, muscarinic 1	83.0024	247.536	6.44907	7.86638
ASHG19A3A005511	-3.32083	-1.73154	3.32083	down	coding	NM_032295	SLC37A3	RefSeq_coding	3033	chr7	-	140033553	140098311		CATTTGGTACGACGTTGGAGGGATCATAGTATTTAGTGTCTCTGATCCGGGACAAGCTAG	84255	Hs.446021	GO:0008643|GO:0055085|GO:0016021|GO:0016020	NP_996996	Solute carrier family 37 (glycerol-3-phosphate transporter), member 3	109.976	411.625	6.85935	8.5909
ASHG19A3A047958	-2.04898	-1.0349	2.04898	down	coding	NM_001135570	C12orf73	RefSeq_coding	1720	chr12	-	104343980	104350993		GCACCTCAGTGTTTCTTGGAGAACCAAATCTGTAACATATATGCATTAAAAATTAAAGGC	728568	Hs.42547	GO:0005576	NP_001129042	Chromosome 12 open reading frame 73	101.942	233.517	6.74624	7.78114
ASHG19A3A005038	-2.49797	-1.32075	2.49797	down	coding	NM_018442	DCAF6	RefSeq_coding	3303	chr1	+	167905907	168045079		GATCCATGTCACTTGACGAGCAACAGGATAACAATAATGAAAAGCTGAGCCCCAAACCAG	55827	Hs.435741	GO:0030374|GO:0045944|GO:0016567|GO:0080008|GO:0005634	NP_060912	DDB1 and CUL4 associated factor 6	115.983	325.185	6.93761	8.25836
ASHG19A3A015303	-2.05769	-1.04102	2.05769	down	coding	NM_198182	GRHL1	RefSeq_coding	3610	chr2	+	10091791	10142411		TCAGAAGAAGTCTTTGATGCCCTGATGCTCAAAACCCCATCTTTGAAGGGCTTGATGGAA	29841	Hs.418493	GO:0003677|GO:0044255|GO:0007275|GO:0005794|GO:0005737|GO:0005634	NP_937825	Grainyhead-like 1 (Drosophila)	169.94	394.473	7.49271	8.53373
ASHG19A3A014195	-2.51288	-1.32934	2.51288	down	coding	NM_004336	BUB1	RefSeq_coding	3509	chr2	-	111395410	111435684		TTCTTTTCACACAACTCCAAACACATCACTGGGAATGGTTCAGGCAACGCCATCCAAAGT	699	Hs.469649	GO:0005524|GO:0000166|GO:0005515|GO:0004672|GO:0004674|GO:0000087|GO:0006915|GO:0051301|GO:0009790|GO:0044419|GO:0000278|GO:0007093|GO:0007094|GO:0000236|GO:0006468|GO:0051983|GO:0007063|GO:0071173|GO:0071173|GO:0000777|GO:0000780|GO:0005829|GO:0000776|GO:0005634	NP_004327	Budding uninhibited by benzimidazoles 1 homolog (yeast)	272.625	773.269	8.17688	9.50622
ASHG19A3A043546	-4.34093	-2.11801	4.34093	down	coding	NM_001818	AKR1C4	RefSeq_coding	1194	chr10	+	5238797	5260910		TCCCCAGTTCTTTTGGAGGACCCAGTTCTTTGTGCCTTAGCAAAGAAACACAAACAAACC	1109	Hs.567245	GO:0004033|GO:0047042|GO:0015125|GO:0047743|GO:0009055|GO:0016491|GO:0008209|GO:0015721|GO:0006699|GO:0008206|GO:0055114|GO:0008202|GO:0005737|GO:0005829	NP_001809	Aldo-keto reductase family 1, member C4 (chlordecone reductase; 3-alpha hydroxysteroid dehydrogenase, type I; dihydrodiol dehydrogenase 4)	698.711	3401.67	9.53729	11.6553
ASHG19A3A031321	-2.2791	-1.18846	2.2791	down	coding	NM_001710	CFB	RefSeq_coding	2646	chr6	+	31913720	31919860		TTGTGCTGACAGCAGCACATTGTTTCACTGTGGATGACAAGGAACACTCAATCAAGGTCA	629	Hs.69771	GO:0001848|GO:0008233|GO:0004252|GO:0006956|GO:0006957|GO:0006957|GO:0045087|GO:0006508|GO:0005576|GO:0005576|GO:0005886|GO:0005886	NP_001701	Complement factor B	1048.39	2686.48	10.1156	11.3041
ASHG19A3A027706	-4.36549	-2.12614	4.36549	down	coding	NM_003714	STC2	RefSeq_coding	5361	chr5	-	172741725	172756506		ATTCGGGGCTTACATGGGATTTGCATGACTTTTCTGCACAACGCTGGAAAATTTGATGCC	8614	Hs.233160	GO:0005179|GO:0007166|GO:0007267|GO:0071456|GO:0046697|GO:0007566|GO:0007584|GO:0043434|GO:0033280|GO:0005576	NP_003705	Stanniocalcin 2	277.15	1365.17	8.20177	10.3279
ASHG19A3A000568	-2.41831	-1.274	2.41831	down	coding	NM_000373	UMPS	RefSeq_coding	6738	chr3	+	124449212	124468117		GTCTCGACCGCGTCTTCTGAGTCAGGTTGCAGATATTTTATTCCAAACTGCCCAAAATGC	7372	Hs.2057	GO:0016829|GO:0004588|GO:0004588|GO:0004590|GO:0004590|GO:0016757|GO:0044205|GO:0006207|GO:0006222|GO:0055086|GO:0009116|GO:0006206|GO:0046134|GO:0006221|GO:0005737|GO:0005829|GO:0005634	NP_000364	Uridine monophosphate synthetase	507.814	1395.03	9.08418	10.3582
ASHG19A3A041719	-2.01947	-1.01398	2.01947	down	coding	NM_001080485	ZNF275	RefSeq_coding	6418	chrX	+	152599612	152618383		TGTTTTCTGGCACTCACTATAATCAGCCTTGCACTAGAGCTGTTTGTGGACTTGGCTTCA	10838	Hs.348963	GO:0003677|GO:0046872|GO:0008270|GO:0005622|GO:0005634	NP_001073954	Zinc finger protein 275	1196.65	2725.78	10.3122	11.3262
ASHG19A3A032572	-2.13307	-1.09293	2.13307	down	coding	NM_002137	HNRNPA2B1	RefSeq_coding	3666	chr7	-	26229556	26240413		TGCAAGACCTCATTCAATTGATGGGAGAGTAGTTGAGCCAAAACGTGCTGTAGCAAGAGA	3181	Hs.487774	GO:0003723|GO:0000166|GO:0005515|GO:0043047|GO:0008380|GO:0050658|GO:0010467|GO:0006397|GO:0000398|GO:0000398|GO:0071013|GO:0005737|GO:0030530|GO:0005730|GO:0005654|GO:0005634|GO:0030529|GO:0005681	NP_112533	Heterogeneous nuclear ribonucleoprotein A2/B1	6466.18	15329.7	12.7361	13.829
ASHG19A3A028759	-2.83687	-1.5043	2.83687	down	coding	NM_016048	ISOC1	RefSeq_coding	1942	chr5	+	128430441	128449717		GTAGAAGCGGCATTAGCAGAGATTCCCGGAGTCAGGAGTGTTGTATTATTTGGAGTAGAA	51015	Hs.483296	GO:0003824|GO:0005777	NP_057132	Isochorismatase domain containing 1	11208.5	34761.3	13.5313	15.0356
ASHG19A3A017554	-2.06401	-1.04545	2.06401	down	coding	NM_080616	C20orf112	RefSeq_coding	6005	chr20	-	31030863	31071288		CCATGGTATTACTTGCTAAATGCACTGATTTCATAAGTATGTGGAATCCTTTTCCTTTTG	140688	Hs.516978		NP_542183	Chromosome 20 open reading frame 112	3983.85	9096.45	12.035	13.0804
ASHG19A3A045619	-3.20142	-1.67871	3.20142	down	coding	NM_000926	PGR	RefSeq_coding	13037	chr11	-	100900354	101000544		ATCGTTGATAAAATCCGCAGAAAAAACTGCCCAGCATGTCGCCTTAGAAAGTGCTGTCAG	5241	Hs.32405	GO:0003677|GO:0019899|GO:0042562|GO:0046872|GO:0005515|GO:0005102|GO:0043565|GO:0003700|GO:0005496|GO:0003707|GO:0016563|GO:0008270|GO:0007267|GO:0002070|GO:0010467|GO:0030879|GO:0045892|GO:0001542|GO:0045893|GO:0050847|GO:0050678|GO:0034339|GO:0007165|GO:0043401|GO:0060748|GO:0005737|GO:0043231|GO:0043005|GO:0005730|GO:0005654|GO:0005634	NP_001189403	Progesterone receptor	288.684	1040.58	8.26011	9.93882
ASHG19A3A029732	-2.28802	-1.1941	2.28802	down	coding	NM_006472	TXNIP	RefSeq_coding	2953	chr1	+	145438461	145442626		AAGACAGCCCTATCTTTATGTATGCCCCTGAGTTCAAGTTCATGCCACCACCGACTTATA	10628	Hs.533977	GO:0004857|GO:0005515|GO:0031625|GO:0007049|GO:0030216|GO:0000122|GO:0048008|GO:0043065|GO:0006606|GO:0042127|GO:0051592|GO:0042493|GO:0032355|GO:0009749|GO:0042542|GO:0009612|GO:0006979|GO:0032570|GO:0005737|GO:0005758|GO:0005634	NP_006463	Thioredoxin interacting protein	4196.7	10617.7	12.108	13.3021
ASHG19A3A017756	-2.78942	-1.47996	2.78942	down	coding	NM_183047	ZMYND8	RefSeq_coding	4652	chr20	-	45838380	45985474		AGCAAAAGGTGTGACAAGCAACCTGCCTATGCCCCAACCACCACAGACCACCAGCCGCAC	23613	Hs.446240	GO:0046872|GO:0005515|GO:0008270	NP_898869	Zinc finger, MYND-type containing 8	1274.92	3989.86	10.4038	11.8838
ASHG19A3A026717	-2.17977	-1.12418	2.17977	down	coding	NM_033312	CDC14A	RefSeq_coding	2453	chr1	+	100818022	100965021		AACTGTCTATGCACTACATTCTGCTAGCTCCTCTTCAAGTAAACGCCAAGTCACAACTGG	8556	Hs.127411	GO:0016787|GO:0004721|GO:0005515|GO:0004725|GO:0008138|GO:0007049|GO:0051301|GO:0008283|GO:0006470|GO:0005737|GO:0005856|GO:0005815|GO:0005730|GO:0005634|GO:0005819	NP_201570	CDC14 cell division cycle 14 homolog A (S. cerevisiae)	89.8984	217.696	6.56041	7.68459
ASHG19A3A047901	-3.4622	-1.79169	3.4622	down	coding	NM_020698	TMCC3	RefSeq_coding	5867	chr12	-	94960899	95044324		GTAGATCTTCACCCCATTGTGGTGTCATCAATGAATCCAAAGCAGGTGCCATTATTTTTT	57458	Hs.370410	GO:0016021|GO:0016020	NP_065749	Transmembrane and coiled-coil domain family 3	438.111	1719.1	8.872	10.6637
ASHG19A3A010183	-2.82576	-1.49864	2.82576	down	coding	NM_001137671	POTEC	RefSeq_coding	2243	chr18	-	14511737	14543599	NR_027480,NM_207355,NM_174981,NM_001145442,NM_001136213,NM_001099771,NM_001083538,NM_001005356,	TTCTCAAGATCTATCTGGACAGACGGCCAGAGAGTATGCTGTTTCTAGTCATCATCATGT	388468	Hs.454726		NP_001131143	POTE ankyrin domain family, member C	322.271	1026.98	8.42182	9.92045
ASHG19A3A018193	-2.03643	-1.02604	2.03643	down	coding	NM_001172132	HCK	RefSeq_coding	2234	chr20	+	30639990	30689655		CCGCTGTCATGAGTTACAGTCCTTCCAGGATGTGCCTCTGAAAATGGATTGCATATAAAT	3055	Hs.655210	GO:0005524|GO:0004715|GO:0000166|GO:0005515|GO:0004713|GO:0016740|GO:0050830|GO:0044419|GO:0007498|GO:0006909|GO:0006468|GO:0050690|GO:0016032|GO:0005901|GO:0005737|GO:0005829|GO:0016020	NP_002101	Hemopoietic cell kinase	118.629	270.665	6.97211	7.99815
ASHG19A3A031392	-2.63308	-1.39675	2.63308	down	coding	NM_020804	PACSIN1	RefSeq_coding	4282	chr6	+	34433904	34502998		GCTGTGGTCTCAGCAATGCACCTGTTTTGTACATGATTGTGTAATTTAAAGGTATATAAA	29993	Hs.520087	GO:0008092|GO:0005515|GO:0004672|GO:0007010|GO:0006897|GO:0045806|GO:0030137|GO:0005737|GO:0005737	NP_065855	Protein kinase C and casein kinase substrate in neurons 1	3023.89	8843.43	11.6401	13.0368
ASHG19A3A051502	-2.20507	-1.14082	2.20507	down	coding	NM_001530	HIF1A	RefSeq_coding	4082	chr14	+	62162118	62214977		GATGCAAATCTAGTGAACAGAATGGAATGGAGCAAAAGACAATTATTTTAATACCCTCTG	3091	Hs.597216	GO:0051879|GO:0035035|GO:0005515|GO:0046982|GO:0046982|GO:0043565|GO:0003700|GO:0003700|GO:0003705|GO:0003705|GO:0004871|GO:0008134|GO:0030528|GO:0032963|GO:0002248|GO:0051541|GO:0001837|GO:0042789|GO:0032364|GO:0045766|GO:0032722|GO:0001938|GO:0010634|GO:0045648|GO:0043193|GO:0045821|GO:0046886|GO:0051000|GO:0045944|GO:0030949|GO:0010575|GO:0010468|GO:0043619|GO:0006355|GO:0032909|GO:0001666|GO:…	NP_851397	Hypoxia inducible factor 1, alpha subunit (basic helix-loop-helix transcription factor)	4357.99	10623.5	12.1633	13.3041
ASHG19A3A003411	-2.50684	-1.32587	2.50684	down	coding	NM_001167617	MLH1	RefSeq_coding	2473	chr3	+	37035267	37092335		AGTATTTCTACCTATGGCTTTCGAGGCTTTGGCCAGCATAAGCCATGTGGCTCATGTTAC	4292	Hs.195364	GO:0005524|GO:0016887|GO:0032407|GO:0032137|GO:0030983|GO:0005515|GO:0005515|GO:0003697|GO:0006200|GO:0008630|GO:0007049|GO:0006303|GO:0045190|GO:0007060|GO:0043060|GO:0006298|GO:0045950|GO:0000289|GO:0048477|GO:0000239|GO:0007131|GO:0000712|GO:0016446|GO:0007283|GO:0051257|GO:0032389|GO:0032390|GO:0005712|GO:0001673|GO:0005634|GO:0000795	NP_001161091	MutL homolog 1, colon cancer, nonpolyposis type 2 (E. coli)	87.0007	243.162	6.51509	7.84096
ASHG19A3A035646	-8.86821	-3.14864	8.86821	down	coding	NM_173833	SCARA5	RefSeq_coding	3643	chr8	-	27727752	27850198		GTATGCATATATAAACATAGCACTTTTTACTACATAGCTCAGCACATTGCAAGGTTTGCA	286133	Hs.591833	GO:0070287|GO:0004872|GO:0005044|GO:0006879|GO:0034605|GO:0006897|GO:0006811|GO:0034755|GO:0070207|GO:0009986|GO:0005887|GO:0005886	NP_776194	Scavenger receptor class A, member 5 (putative)	160.981	1608.68	7.41538	10.564
ASHG19A3A021040	-2.1229	-1.08604	2.1229	down	coding	NM_001005909	IP6K2	RefSeq_coding	1809	chr3	-	48725436	48754706		AAACATCATGTCTTAGAAACAGAAAAGACCCCTAAGGACTGGGTGCGTCAGCACCGTAAA	51447	Hs.595983	GO:0005524|GO:0000832|GO:0004428|GO:0008440|GO:0000166|GO:0016740|GO:0019221|GO:0030308|GO:0046854|GO:0043065|GO:0060337|GO:0045111|GO:0043231|GO:0005634	NP_057375	Inositol hexakisphosphate kinase 2	330.982	795.038	8.46055	9.54659
ASHG19A3A009371	-2.05743	-1.04084	2.05743	down	coding	NM_015355	SUZ12	RefSeq_coding	4477	chr17	+	30264043	30328057		TGCTTTTAGTCGCAACGGACCAGTTAAGAGAACACCTATCACACATATTCTTGTGTGCAG	23512	Hs.462732	GO:0003682|GO:0042054|GO:0046872|GO:0035064|GO:0005515|GO:0008270|GO:0016568|GO:0016571|GO:0016574|GO:0045596|GO:0000122|GO:0008284|GO:0035098|GO:0035098|GO:0005622|GO:0005634|GO:0001739	NP_056170	Suppressor of zeste 12 homolog (Drosophila)	210.871	492.873	7.80575	8.84659
ASHG19A3A006792	-2.16825	-1.11653	2.16825	down	coding	NM_198435	AURKA	RefSeq_coding	2135	chr20	-	54944444	54967351		TTGGGTCGCAGGTGGGAGCCGACGGGCATCATGGACCGATCTAAAGAAAACTGCATTTCA	6790	Hs.250822	GO:0005524|GO:0000166|GO:0005515|GO:0004672|GO:0019901|GO:0004674|GO:0031625|GO:0031145|GO:0007049|GO:0051301|GO:0007067|GO:0000278|GO:0048015|GO:0006468|GO:0031647|GO:0032355|GO:0007051|GO:0005737|GO:0005856|GO:0005829|GO:0005634|GO:0048471|GO:0005819|GO:0005876|GO:0031616	NP_940839	Aurora kinase A	161.171	394.583	7.41748	8.53401
ASHG19A3A026040	-4.38759	-2.13343	4.38759	down	coding	NM_032961	PCDH10	RefSeq_coding	5384	chr4	+	134070469	134112731		TAGTAAGCTCTAAGGACAGTGGTCATGGAGACAGTGAACAGGGAGATAGTGATCATGATG	57575	Hs.192859	GO:0005509|GO:0007155|GO:0007156|GO:0016021|GO:0005886	NP_116586	Protocadherin 10	114.824	570.041	6.92265	9.05608
ASHG19A3A011603	-2.03175	-1.02272	2.03175	down	coding	NM_005091	PGLYRP1	RefSeq_coding	972	chr19	-	46522411	46526556		TATGTGCTCAAAGGACACCGGGATGTGCAGCGTACACTCTCTCCAGGCAACCAGCTCTAC	8993	Hs.137583	GO:0008745|GO:0051635|GO:0042834|GO:0016019|GO:0008270|GO:0050830|GO:0016045|GO:0006955|GO:0045087|GO:0009253|GO:0045187|GO:0005576	NP_005082	Peptidoglycan recognition protein 1	102.697	233.462	6.75813	7.78085
ASHG19A3A004586	-2.03524	-1.0252	2.03524	down	coding	NM_007103	NDUFV1	RefSeq_coding	1631	chr11	+	67374322	67380012		CGCGGGTATCTGTGCGTTTCAGCGGCGACACGACAGCACCCAAGAAAACCTCATTTGGCT	4723	Hs.7744	GO:0051539|GO:0010181|GO:0051287|GO:0008137|GO:0003954|GO:0046872|GO:0006120|GO:0006120|GO:0022904|GO:0006810|GO:0016020|GO:0005743|GO:0005743|GO:0005747|GO:0005747|GO:0005747|GO:0005739|GO:0070469	NP_009034	NADH dehydrogenase (ubiquinone) flavoprotein 1, 51kDa	102.691	233.778	6.75801	7.7832
ASHG19A3A011718	-3.79649	-1.92466	3.79649	down	coding	NM_001080457	LRRC4B	RefSeq_coding	2958	chr19	-	51020151	51071302		TTTTGATACTGAAGGGAGGTTTGCGTCAACGACTACCTGCTCTGTAATTACTTTAAAAAA	94030	Hs.120873	GO:0030054|GO:0016021|GO:0005886|GO:0042734|GO:0045202	NP_001073926	Leucine rich repeat containing 4B	80.2614	342.107	6.40257	8.32724
ASHG19A3A051752	-2.1862	-1.12843	2.1862	down	coding	NM_032632	PAPOLA	RefSeq_coding	4539	chr14	+	96968719	97033446		ATAACAGCATGTCTGTGCCTTCACCTACTAGTGCTACGAAGACCAGTCCATTGAACAGTT	10914	Hs.728889	GO:0005524|GO:0003723|GO:0000166|GO:0016779|GO:0004652|GO:0016740|GO:0008380|GO:0010467|GO:0031124|GO:0006378|GO:0006397|GO:0000398|GO:0006369|GO:0006366|GO:0005737|GO:0005730|GO:0005654|GO:0005634|GO:0005634	NP_116021	Poly(A) polymerase alpha	925.473	2281.7	9.93764	11.0661
ASHG19A3A049224	-2.027	-1.01934	2.027	down	coding	NM_138575	PGAM5	RefSeq_coding	1194	chr12	+	133287392	133295750		GTTACATGCCTGAAACAGTCAGAAGGGTTGGCCAAATCTCACTAAATGCAAATTTGAAAC	192111	Hs.102558	GO:0016787|GO:0004721|GO:0016021|GO:0016020|GO:0005741|GO:0005739	NP_612642	Phosphoglycerate mutase family member 5	73.4057	166.245	6.27499	7.29433
ASHG19A3A046301	-2.17727	-1.12252	2.17727	down	coding	NM_001145033	AG2	RefSeq_coding	1361	chr11	+	43964105	43965432		TGGATATGTCTGTGAGGCTCCTGAAAGGAGACAAATAAAGTCAATATATTTGCACAGTGC	387763	Hs.714890		NP_001138505	Chromosome 11 open reading frame 96	164.583	404.159	7.44503	8.56755
ASHG19A3A005009	-2.11707	-1.08207	2.11707	down	coding	NM_018193	FANCI	RefSeq_coding	4569	chr15	+	89787193	89860362		CCAGTCTTCTCACTGCTCTTTTCAGAGTCTTGCTATGGAGATACACTTCAATTCCTACTT	55215	Hs.513126	GO:0005515|GO:0006281|GO:0007049|GO:0005654|GO:0005654|GO:0005634	NP_060663	Fanconi anemia, complementation group I	529.317	1271.72	9.14388	10.2259
ASHG19A3A026494	-2.16458	-1.11408	2.16458	down	coding	NM_017755	NSUN2	RefSeq_coding	3089	chr5	-	6599354	6633157		AACACGGGGATCAAAGTCTGGTGTAGAAATAACAGCGGTGAAGAGTTTGACTGTGCTTTC	54888	Hs.481526	GO:0008168|GO:0016428|GO:0000049|GO:0016740|GO:0030488|GO:0008033|GO:0005737|GO:0005730|GO:0005634	NP_060225	NOP2/Sun domain family, member 2	636.924	1558.31	9.40538	10.5195
ASHG19A3A018422	-2.08934	-1.06305	2.08934	down	coding	NM_001316	CSE1L	RefSeq_coding	3579	chr20	+	47662837	47713484		AGTGGCCATTAAAGCCAACATAGTGCACTTGATGCTTAGCAGCCCAGAGCAAATTCAGAA	1434	Hs.90073	GO:0008262|GO:0005515|GO:0006915|GO:0008283|GO:0006886|GO:0005737|GO:0005634	NP_001307	CSE1 chromosome segregation 1-like (yeast)	1453.76	3405.13	10.5935	11.6565
ASHG19A3A053352	-4.2726	-2.09511	4.2726	down	coding	NM_022773	LMF1	RefSeq_coding	2620	chr16	-	903634	1020984	NR_033646,	ACACGGGCACCTTCTGGCTGACCCGGATCGTGCTCCTGAAGGCCCTAGCCTTCGTGTACT	64788	Hs.71912	GO:0009306|GO:0005783|GO:0005789|GO:0016021|GO:0016020	NP_073610	Lipase maturation factor 1	80.0677	383.693	6.39981	8.49492
ASHG19A3A031577	-2.46322	-1.30054	2.46322	down	coding	NM_007355	HSP90AB1	RefSeq_coding	2567	chr6	+	44214848	44221614		TGGGTATCGGAAAGCAAGCCTACGTTGCTCACTATTACGTATAATCCTTTTCTTTTCAAG	3326	Hs.509736	GO:0005524|GO:0030911|GO:0030235|GO:0000166|GO:0005515|GO:0051082|GO:0007411|GO:0032435|GO:0001890|GO:0045429|GO:0006457|GO:0060334|GO:0060338|GO:0006986|GO:0005737|GO:0005829|GO:0005622|GO:0042470|GO:0005739	NP_031381	Heat shock protein 90kDa alpha (cytosolic), class B member 1	522.459	1457.23	9.12407	10.4246
ASHG19A3A045103	-7.48781	-2.90454	7.48781	down	coding	NM_003654	CHST1	RefSeq_coding	2735	chr11	-	45670426	45687172		TGAGCTTCTGATTGATCTCGGGGTCCATCTGTGATATTTCTTTGTGCCAAAAAGAAAAAA	8534	Hs.104576	GO:0045130|GO:0008146|GO:0016740|GO:0006012|GO:0006954|GO:0042339|GO:0005976|GO:0006790|GO:0005794|GO:0000139|GO:0016021|GO:0016020	NP_003645	Carbohydrate (keratan sulfate Gal-6) sulfotransferase 1	329.424	2788.42	8.45387	11.3584
ASHG19A3A004965	-3.10565	-1.6349	3.10565	down	coding	NM_017724	LRRFIP2	RefSeq_coding	2863	chr3	-	37094116	37217851		AGACACTTCATTAAGTGAATTGCGGGAATCTTTGTCTGAAGTGGAAGAAAAATACAAGAA	9209	Hs.475319	GO:0030275|GO:0005515|GO:0016055|GO:0008150|GO:0005575	NP_060194	Leucine rich repeat (in FLII) interacting protein 2	115.131	401.894	6.9256	8.56049
ASHG19A3A039350	-2.01455	-1.01046	2.01455	down	coding	NM_031426	AIF1L	RefSeq_coding	3406	chr9	+	133971911	133998539		AGTGTGCGTGGACTGGGATATCATCTCTACAGCCTGCAAATAAACCAGACAAACTTACCA	83543	Hs.4944	GO:0051015|GO:0005509|GO:0015629|GO:0005884|GO:0042995|GO:0005737|GO:0005925|GO:0005886|GO:0032587	NP_113614	Allograft inflammatory factor 1-like	20723.1	45360.2	14.4171	15.4276
ASHG19A3A019409	-2.80404	-1.48751	2.80404	down	coding	NM_001136213	POTEH	RefSeq_coding	2037	chr22	-	16256331	16287937	NR_027480,NM_207355,NM_174981,NM_001145442,NM_001137671,NM_001099771,NM_001083538,NM_001005356,	TTCTCAAGATCTATCTGGACAGACGGCCAGAGAGTATGCTGTTTCTAGTCGTCATAATGT	23784	Hs.581075		NP_001129685	POTE ankyrin domain family, member H	296.528	939.834	8.29894	9.78645
ASHG19A3A049842	-2.5343	-1.34159	2.5343	down	coding	NM_017664	ANKRD10	RefSeq_coding	2495	chr13	-	111530887	111567416		ATGGCGACACAGAAGACGATGCTGACAAAATGCACGTTGATAGGGAGTTTGCTGTTGTAA	55608	Hs.525163		NP_060134	Ankyrin repeat domain 10	197.126	566.6	7.7057	9.04729
ASHG19A3A021226	-2.2778	-1.18764	2.2778	down	coding	NM_004742	MAGI1	RefSeq_coding	6178	chr3	-	65344945	66024509		TTTGAGTGTTGCCTTAGACTGTCTGACTGGACAAATAAACTCTCTTTGCCCTATGTTAAC	9223	Hs.651939	GO:0005524|GO:0000166|GO:0008022|GO:0005515|GO:0007155|GO:0007166|GO:0006461|GO:0005911|GO:0005886|GO:0005923	NP_056335	Membrane associated guanylate kinase, WW and PDZ domain containing 1	111.555	284.573	6.8807	8.06834
ASHG19A3A045567	-2.18803	-1.12963	2.18803	down	coding	NM_012193	FZD4	RefSeq_coding	7391	chr11	-	86656721	86666433		GCATCGATGTCTGTACTGTAAATTTCTAATTTATCACTGTACAAAGAAAACCCCTTGCTA	8322	Hs.591968	GO:0004930|GO:0030165|GO:0030165|GO:0030165|GO:0042813|GO:0017147|GO:0019955|GO:0005515|GO:0046982|GO:0042803|GO:0016055|GO:0007223|GO:0007420|GO:0060070|GO:0060070|GO:0007166|GO:0071300|GO:0009790|GO:0035426|GO:0031987|GO:0010812|GO:0030182|GO:0051091|GO:0042701|GO:0010551|GO:0030947|GO:0061299|GO:0007605|GO:0007165|GO:0034446|GO:0001570|GO:0042995|GO:0009986|GO:0005737|GO:0005887|GO:0005886	NP_036325	Frizzled homolog 4 (Drosophila)	2532.98	6274.68	11.4007	12.5304
ASHG19A3A000650	-2.5764	-1.36536	2.5764	down	coding	NM_001001389	CD44	RefSeq_coding	5619	chr11	+	35160416	35253946		AGCACAGACAGAATCCCTGCTACCAGTACGTCTTCAAATACCATCTCAGCAGGCTGGGAG	960	Hs.502328	GO:0005518|GO:0005540|GO:0005515|GO:0004888|GO:0016337|GO:0007160|GO:0019221|GO:0060333|GO:0043518|GO:0043066|GO:0070374|GO:0033138|GO:0050731|GO:0005794|GO:0009986|GO:0005737|GO:0005887|GO:0005886	NP_001189486	CD44 molecule (Indian blood group)	1068.82	3085.21	10.1447	11.51
ASHG19A3A030581	-3.52649	-1.81823	3.52649	down	coding	NM_014739	BCLAF1	RefSeq_coding	7277	chr6	-	136578000	136610989	NM_001077440,ENST00000505813,	TTACTTCAGTGATAAAGAGTCTGGAAAACAAAAGTTTAATGATTCAGAAGGGGATGACAC	9774	Hs.486542	GO:0003677|GO:0005515|GO:0016564|GO:0016564|GO:0006917|GO:0043065|GO:0005737|GO:0005730|GO:0005634|GO:0005634	NP_055554	BCL2-associated transcription factor 1	77.1611	305.351	6.34983	8.16806
ASHG19A3A050881	-2.69296	-1.42919	2.69296	down	coding	NM_002083	GPX2	RefSeq_coding	1024	chr14	-	65405871	65409531		AAGTTGCCATATAGATGTGAACTGCTCAACACACAGATCTCCTACTCCATCCAGTCCTGA	2877	Hs.2704	GO:0009055|GO:0004602|GO:0016491|GO:0051702|GO:0002862|GO:0055114|GO:0006979|GO:0009609|GO:0001659|GO:0005737	NP_002074	Glutathione peroxidase 2 (gastrointestinal)	872.681	2653.84	9.85472	11.2839
ASHG19A3A035266	-2.77743	-1.47375	2.77743	down	coding	NM_005435	ARHGEF5	RefSeq_coding	5505	chr7	+	144052488	144077724	ENST00000378112,	AGTATGCGACGGACAGAGGAACTAATCTACCTGAGCCAGAAGATTGAGTTTGAGTGCAAA	7984	Hs.334	GO:0005525|GO:0005089|GO:0005085|GO:0005515|GO:0035556|GO:0035023|GO:0005622	NP_005426	Rho guanine nucleotide exchange factor (GEF) 5	74.2511	231.109	6.29307	7.76682
ASHG19A3A029466	-4.47695	-2.16252	4.47695	down	coding	NM_001080480	MBOAT1	RefSeq_coding	3275	chr6	-	20100934	20212670		ATGTCCGGCATGCGGTTGCCACCATTTTTGGCATCTATTTTGTCATCTTTTGTTTCGGCT	154141	Hs.377830	GO:0008415|GO:0016740|GO:0008654|GO:0016021|GO:0016020	NP_001073949	Membrane bound O-acyltransferase domain containing 1	79.4064	399.683	6.38881	8.55132
ASHG19A3A051168	-2.35363	-1.23489	2.35363	down	coding	NM_001823	CKB	RefSeq_coding	1431	chr14	-	103985995	103989170		TTTGATGGCTAAGATACTGCTGATGCTGAAATAAACTAGGGTTTTGGCCTGCCTGCGTCT	1152	Hs.173724	GO:0005524|GO:0004111|GO:0000166|GO:0007420|GO:0030644|GO:0034641|GO:0006600|GO:0005737|GO:0005829|GO:0005739	NP_001814	Creatine kinase, brain	19750	50321.8	14.3504	15.5853
ASHG19A3A053896	-2.01925	-1.01382	2.01925	down	coding	NM_138383	MTSS1L	RefSeq_coding	4977	chr16	-	70695107	70719954		CTGCTACAAGTAACAGATGCACTGTGAAGATTCCAGTATTAATAAAGGTGTACTGTAATT	92154	Hs.432387	GO:0017124|GO:0003779|GO:0008093|GO:0046847|GO:0007165	NP_612392	Metastasis suppressor 1-like	25555	54412.4	14.7032	15.717
ASHG19A3A017205	-4.73821	-2.24434	4.73821	down	coding	NM_001001666	ANO7	RefSeq_coding	916	chr2	+	242127923	242135581		TGACACTACCTTTGCCATTCACCTGTCCCGTCTCCAACATTAAAGCTTTTGGGTAGGCGT	50636	Hs.163909	GO:0005254|GO:0005216|GO:0006811|GO:0030054|GO:0034707|GO:0005737|GO:0005829|GO:0016021|GO:0005886	NP_001001891	Anoctamin 7	231.672	1235.27	7.94048	10.1848
ASHG19A3A017979	-2.94467	-1.55811	2.94467	down	coding	NM_001110514	EBF4	RefSeq_coding	2931	chr20	+	2673523	2740753		ACATTCTGCTCTGCTAAGTTTGGAGAAAACAGAACAATAAACCAGATGCAGGTGGTGCCC	57593	Hs.471955	GO:0003677|GO:0046872|GO:0030528|GO:0007275|GO:0006355|GO:0005634	NP_001103984	Early B-cell factor 4	251.913	837.492	8.06045	9.61856
ASHG19A3A031602	-2.13018	-1.09098	2.13018	down	coding	NM_012120	CD2AP	RefSeq_coding	5425	chr6	+	47445524	47594994		TCAGAAAACTTGCTTCATCTCACTGCAAATAGACCAAAGATGCCTGGAAGAAGGTTGCCG	23607	Hs.485518	GO:0017124|GO:0005515|GO:0005200|GO:0007049|GO:0051301|GO:0007067|GO:0006461|GO:0007165|GO:0006930|GO:0015629|GO:0005737|GO:0031941|GO:0005730|GO:0005886|GO:0001726	NP_036252	CD2-associated protein	310.578	750.614	8.37029	9.46127
ASHG19A3A003412	-2.2793	-1.18859	2.2793	down	coding	NM_001167619	MLH1	RefSeq_coding	2386	chr3	+	37035267	37092335		TGGCAATCAAGGGACCCAGATCACGGTATTCAGTACACAATGCAGGCATTAGTTTCTCAG	4292	Hs.195364	GO:0005524|GO:0016887|GO:0032407|GO:0032137|GO:0030983|GO:0005515|GO:0005515|GO:0003697|GO:0006200|GO:0008630|GO:0007049|GO:0006303|GO:0045190|GO:0007060|GO:0043060|GO:0006298|GO:0045950|GO:0000289|GO:0048477|GO:0000239|GO:0007131|GO:0000712|GO:0016446|GO:0007283|GO:0051257|GO:0032389|GO:0032390|GO:0005712|GO:0001673|GO:0005634|GO:0000795	NP_001161091	MutL homolog 1, colon cancer, nonpolyposis type 2 (E. coli)	149.205	383.642	7.30581	8.4944
ASHG19A3A005844	-3.08969	-1.62746	3.08969	down	coding	NM_001134405	RUNDC3B	RefSeq_coding	4050	chr7	+	87257728	87461612	NM_138290,NM_001134406,	ATGCTTCTAGGACTCAATGCTATTGATTTCAGTTTCTGCCTAAAGGGAGAGGGGCTGGAT	154661	Hs.411488		NP_612147	RUN domain containing 3B	73.626	254.022	6.27934	7.90681
ASHG19A3A020552	-3.91295	-1.96826	3.91295	down	coding	NM_015038	KIAA0754	RefSeq_coding	6979	chr1	+	39875175	39882154		TGTACAAAGTGAAGACAGTAGGTCAACAACAGAGCCATTCTTGATAATACAGAATATTTC	643314	Hs.658760		NP_055853	KIAA0754	362.314	1611.25	8.59753	10.5658
ASHG19A3A001519	-2.00577	-1.00415	2.00577	down	coding	NM_001077489	GNAS	RefSeq_coding	1881	chr20	+	57466424	57486249		GGATCCTGCATGTTAATGGGTTTAATGGAGATGAGAAGGCAACCAAAGTGCAGGACATCA	2778	Hs.125898	GO:0031683|GO:0005525|GO:0003924|GO:0003924|GO:0004016|GO:0019001|GO:0005085|GO:0042802|GO:0035255|GO:0003674|GO:0031852|GO:0000166|GO:0005515|GO:0004871|GO:0004871|GO:0007186|GO:0006184|GO:0006184|GO:0007190|GO:0007191|GO:0007191|GO:0007596|GO:0006171|GO:0051216|GO:0071377|GO:0048701|GO:0035116|GO:0001958|GO:0006112|GO:0007565|GO:0046907|GO:0030168|GO:0045669|GO:0045672|GO:0040032|GO:0009791|GO:…	NP_536351	GNAS complex locus	9438.36	21012.3	13.2721	14.2763
ASHG19A3A032506	-2.90897	-1.54051	2.90897	down	coding	NM_176813	AGR3	RefSeq_coding	763	chr7	-	16899030	16921613		CTTCCAACCTTGCCATTGCAATAAAAAAGGAAAAGAGGCCTCCTCAGACACTCTCAAGAG	155465	Hs.100686	GO:0005576	NP_789783	Anterior gradient homolog 3 (Xenopus laevis)	2068.56	6780.58	11.1066	12.6471
CUST_23_PI426249100	-2.41227	-1.27039	2.41227	down	coding	NM_002145_Exon2-	NM_002145	HOX cluster	1089	chr17	-	46620020	46621109	NM_002145,	GGAATAATTAAACTCTAGGGGGACTTTCTTAAAAATAACTAGAGGGACCTATTTTCCTCT						157.113	428.316	7.37964	8.65003
ASHG19A3A043121	-2.05558	-1.03954	2.05558	down	coding	NM_013451	MYOF	RefSeq_coding	6860	chr10	-	95066186	95242074		TCCTGCAAAATCACCAGAGAAATGCAGATTGGACATGATTCCGGACCTCAAAGCCATGAA	26509	Hs.602086	GO:0005543|GO:0005543|GO:0005515|GO:0008015|GO:0006936|GO:0001778|GO:0005901|GO:0031410|GO:0030659|GO:0016021|GO:0043231|GO:0005635|GO:0031965|GO:0005634|GO:0005886	NP_579899	Myoferlin	4063.01	9245.89	12.0632	13.1028
ASHG19A3A004563	-2.06575	-1.04666	2.06575	down	coding	NM_006924	SFRS1	RefSeq_coding	5468	chr17	-	56078281	56084707		TAACACTAAGTTTAGATCTCATGAGGGAGAAACTGCCTACATCCGGGTTAAAGTTGATGG	6426	Hs.68714	GO:0003723|GO:0050733|GO:0000166|GO:0005515|GO:0008380|GO:0060048|GO:0010467|GO:0001701|GO:0031124|GO:0006406|GO:0006397|GO:0006376|GO:0000398|GO:0000398|GO:0006369|GO:0006366|GO:0071013|GO:0005737|GO:0016607|GO:0005654|GO:0005634	NP_008855	Serine/arginine-rich splicing factor 1	3548.1	8137.13	11.8706	12.9173
ASHG19A3A003425	-2.18561	-1.12804	2.18561	down	coding	NM_001167871	ATP5SL	RefSeq_coding	1655	chr19	-	41937223	41945843	NM_001167870,	TGTACAAGGTGCATGAGAAAAATCGGTTTCGAGACAAGGAGTGGATCAGGCCAGATAAGT	55101	Hs.728825	GO:0005739	NP_060505	ATP5S-like	106.016	259.155	6.80562	7.93366
ASHG19A3A028908	-2.23462	-1.16003	2.23462	down	coding	NM_031852	PCDHA7	RefSeq_coding	2370	chr5	+	140213968	140216336	NM_018910,	TGTCAACGTGTACCTGATCATCGCCATCTGCGCGGTGTCCAGTCTGTTGGTGCTTACCCT	56117	Hs.199343			Protocadherin alpha cluster, complex locus	337.753	854.704	8.4889	9.64893
ASHG19A3A052144	-2.18875	-1.13011	2.18875	down	coding	NM_138792	LEO1	RefSeq_coding	2162	chr15	-	52230224	52263958		AAACGCAAGAATGCGATTGCATCTGATTCAGAAGCGGATAGTGACACTGAGGTGCCAAAA	123169	Hs.567662	GO:0005515|GO:0033523|GO:0010390|GO:0016593|GO:0005634	NP_620147	Leo1, Paf1/RNA polymerase II complex component, homolog (S. cerevisiae)	1429.75	3496.36	10.5691	11.6992
ASHG19A3A006097	-2.28833	-1.19429	2.28833	down	coding	NM_148918	SHMT1	RefSeq_coding	2423	chr17	-	18231194	18266856		GCTGGCATGATCTTCTACAGGAAAGGGGTTGCTGTGGCACTGAAGCAAGCTATGACTCTG	6470	Hs.513987	GO:0008732|GO:0016597|GO:0004372|GO:0004372|GO:0042803|GO:0030170|GO:0016740|GO:0006565|GO:0045329|GO:0034641|GO:0046655|GO:0046655|GO:0019264|GO:0006730|GO:0051289|GO:0051262|GO:0009113|GO:0006766|GO:0006767|GO:0005737|GO:0005829|GO:0005829|GO:0005739|GO:0005634	NP_683718	Serine hydroxymethyltransferase 1 (soluble)	344.192	891.263	8.51718	9.71148
ASHG19A3A019578	-2.54322	-1.34665	2.54322	down	coding	NM_004964	HDAC1	RefSeq_coding	2091	chr1	+	32757707	32799224		TACATTAAATTCTTGCGCTCCATCCGTCCAGATAACATGTCGGAGTACAGCAAGCAGATG	3065	Hs.88556	GO:0032041|GO:0046969|GO:0046970|GO:0019899|GO:0004407|GO:0004407|GO:0004407|GO:0034739|GO:0042826|GO:0016787|GO:0042802|GO:0005515|GO:0033558|GO:0033558|GO:0003700|GO:0016566|GO:0016563|GO:0008134|GO:0008134|GO:0006916|GO:0007596|GO:0016568|GO:0006338|GO:0042733|GO:0009913|GO:0061029|GO:0061198|GO:0060789|GO:0070932|GO:0070933|GO:0016575|GO:0044419|GO:0043922|GO:0043066|GO:0045786|GO:0010553|GO:…	NP_004955	Histone deacetylase 1	395.712	1138.03	8.71958	10.0662
ASHG19A3A027735	-2.23942	-1.16313	2.23942	down	coding	NM_006621	AHCYL1	RefSeq_coding	4024	chr1	+	110527307	110566363		AATTTCTGTGTGAAGAACATCAAGCAGGCAGAATTTGGACGCCGGGAGATTGAGATTGCA	10768	Hs.725986	GO:0004013|GO:0016787|GO:0006730|GO:0005783	NP_006612	Adenosylhomocysteinase-like 1	91.3707	227.706	6.58295	7.74608
ASHG19A3A001969	-4.63524	-2.21264	4.63524	down	coding	NM_001126132	TNNT1	RefSeq_coding	1011	chr19	-	55644161	55660606	NM_001126133,	TGACTACATGGGGGAGGAACAGCTCCGGGAGAAAGCCCAGGAGCTGTCGGACTGGATCCA	7138	Hs.631558	GO:0005523|GO:0031014|GO:0030049|GO:0045932|GO:0003009|GO:0031444|GO:0005829|GO:0005861|GO:0005861	NP_003274	Troponin T type 1 (skeletal, slow)	231.248	1203.5	7.93745	10.1501
ASHG19A3A043575	-2.03622	-1.02589	2.03622	down	coding	NM_013285	GNL2	RefSeq_coding	2419	chr1	-	38032413	38061586		TATCCAACACTTGCTTTCCATGCAAGCCTTACTAACCCGTTTGGCAAGGGAGCATTCATT	29889	Hs.75528	GO:0005525|GO:0005525|GO:0003924|GO:0000166|GO:0005515|GO:0006184|GO:0008150|GO:0042254|GO:0005622|GO:0005730|GO:0005634	NP_037417	Guanine nucleotide binding protein-like 2 (nucleolar)	368.69	854.519	8.62228	9.64817
ASHG19A3A026924	-2.27285	-1.18451	2.27285	down	coding	NM_015084	MRPS27	RefSeq_coding	2797	chr5	-	71515237	71616084	BC030521,	GCCTAAAACAAAAGAACTCAGTGGGTTTCAGTTCCCAGTTGTATGGCTATGCACTTCTTG	23107	Hs.482491	GO:0005739|GO:0005840	NP_055899	Mitochondrial ribosomal protein S27	164.54	422.492	7.44443	8.62894
ASHG19A3A002102	-2.09079	-1.06405	2.09079	down	coding	NM_001128918	MARK3	RefSeq_coding	3546	chr14	+	103851700	103970164		TATGAGAGGAACGGGAGATATGAGGGCTCAAGTCGCAATGTATCTGCTGAGCAAAAAGAT	4140	Hs.35828	GO:0005524|GO:0000166|GO:0005515|GO:0004674|GO:0016740|GO:0006468	NP_002367	MAP/microtubule affinity-regulating kinase 3	459.611	1088.74	8.93858	10.0026
ASHG19A3A003483	-2.10469	-1.07361	2.10469	down	coding	NM_001168412	TSPAN3	RefSeq_coding	3679	chr15	-	77336361	77363570		GCTGGTCTTTCTCAACCTCATCTTCTGGTTTGTCATCATCCTGCTCTTGGTTTTTGTCAC	10099	Hs.728882	GO:0016021|GO:0016020	NP_944492	Tetraspanin 3	585.663	1396.24	9.28596	10.3596
ASHG19A3A020814	-2.35379	-1.23499	2.35379	down	coding	NM_001068	TOP2B	RefSeq_coding	5189	chr3	-	25639474	25705788		AGAGGAATGATAAACGTGAAGTAAAAGTTGCCCAGTTGGCTGGCTCTGTTGCTGAGATGT	7155	Hs.475733	GO:0005524|GO:0003918|GO:0008094|GO:0003682|GO:0042826|GO:0000166|GO:0008022|GO:0046982|GO:0005080|GO:0003700|GO:0006265|GO:0006261|GO:0070683|GO:0006312|GO:0006355|GO:0000712|GO:0000819|GO:0009330|GO:0071778|GO:0005694|GO:0005737|GO:0005829|GO:0000792|GO:0005730|GO:0005654|GO:0005634|GO:0000795	NP_001059	Topoisomerase (DNA) II beta 180kDa	292.391	776.347	8.27833	9.51331
ASHG19A3A005872	-2.33707	-1.2247	2.33707	down	coding	NM_138564	KLK15	RefSeq_coding	1054	chr19	-	51328545	51334779		CCAGCCCGCACGCCTGAACCCCCAGGGTGACTCTGGGGGACCCCTGGTCTGTGGGGGCAT	55554	Hs.567535	GO:0008233|GO:0004252|GO:0008236|GO:0006508|GO:0005576	NP_612631	Kallikrein-related peptidase 15	132.91	350.279	7.13601	8.3607
ASHG19A3A046575	-2.31768	-1.21268	2.31768	down	coding	NM_013265	C11orf2	RefSeq_coding	2546	chr11	+	64863682	64879180		AATATCCAGAAGCTATTCTCTGAACGTATTGATGTGTTCAGCCCTGTGGAGTTCAACAAG	738	Hs.277517	GO:0003674|GO:0008150|GO:0006869|GO:0015031|GO:0005794|GO:0016021	NP_037397	Chromosome 11 open reading frame 2	2538.34	6654.39	11.4041	12.6168
ASHG19A3A050642	-3.66104	-1.87225	3.66104	down	coding	NM_005518	HMGCS2	RefSeq_coding	2477	chr1	-	120290619	120311555		ATGCCATGGTGGTCTGTGGAGACATTGCCGTCTATCCCAGTGGTAATGCTCGTCCCACAG	3158	Hs.59889	GO:0004421|GO:0016740|GO:0043441|GO:0060612|GO:0007420|GO:0046950|GO:0044255|GO:0071230|GO:0071398|GO:0071385|GO:0032870|GO:0032869|GO:0071222|GO:0071407|GO:0071445|GO:0006695|GO:0008299|GO:0046951|GO:0001822|GO:0001889|GO:0030324|GO:0007494|GO:0033555|GO:0009617|GO:0051591|GO:0042493|GO:0045471|GO:0033762|GO:0060416|GO:0070543|GO:0010038|GO:0034284|GO:0007584|GO:0034696|GO:0042594|GO:0009266|GO:…	NP_005509	3-hydroxy-3-methylglutaryl-CoA synthase 2 (mitochondrial)	76.5553	314.978	6.33989	8.21214
ASHG19A3A043551	-2.82746	-1.49951	2.82746	down	coding	NM_005863	NET1	RefSeq_coding	3297	chr10	+	5488545	5500424		CCTATTAAAAGGACCATACGAGTCCTAGATGTCAATAACCAGTCCTTCAGAGAACAAGAG	10276	Hs.25155	GO:0005089|GO:0005085|GO:0006915|GO:0008624|GO:0048011|GO:0035023|GO:0001558|GO:0051056|GO:0007165|GO:0007264|GO:0005737|GO:0005829|GO:0005829|GO:0005622|GO:0005634	NP_005854	Neuroepithelial cell transforming 1	124.671	397.73	7.04555	8.54505
ASHG19A3A002104	-2.43311	-1.2828	2.43311	down	coding	NM_001128921	MARK3	RefSeq_coding	3264	chr14	+	103851700	103970164		AAACGGATCGTACATCGAGACCTCAAGGAACTGAGAGAGAGAGTATTAAGAGGGAAATAC	4140	Hs.35828	GO:0005524|GO:0000166|GO:0005515|GO:0004674|GO:0016740|GO:0006468	NP_002367	MAP/microtubule affinity-regulating kinase 3	102.189	277.681	6.75045	8.03326
ASHG19A3A034794	-3.19247	-1.67467	3.19247	down	coding	NM_152755	CNPY4	RefSeq_coding	1547	chr7	+	99717264	99723126		TTTGTAGACGGCGCTTTGTCATGGGACCTGTGCGGTTGGGAATATTGCTTTTCCTTTTTT	245812	Hs.632293	GO:0005102|GO:0005576	NP_689968	Canopy 4 homolog (zebrafish)	95.2262	340.246	6.64546	8.32014
ASHG19A3A043541	-3.8853	-1.95803	3.8853	down	coding	NM_001353	AKR1C1	RefSeq_coding	1384	chr10	+	5005453	5020157	NM_205845,NM_001354,	AGAGGAGATGAAAGCCATAGATGGCCTAAACAGAAATGTGCGATATTTGACCCTTGATAT	1645	Hs.460260	GO:0047006|GO:0004033|GO:0047042|GO:0032052|GO:0031406|GO:0047718|GO:0016491|GO:0047115|GO:0015721|GO:0008206|GO:0042632|GO:0007586|GO:0030299|GO:0055114|GO:0051260|GO:0046683|GO:0006805|GO:0005737|GO:0005829	NP_001344	Aldo-keto reductase family 1, member C1 (dihydrodiol dehydrogenase 1; 20-alpha (3-alpha)-hydroxysteroid dehydrogenase)	10803.6	45399.5	13.4706	15.4286
ASHG19A3A018396	-2.535	-1.34198	2.535	down	coding	NM_030777	SLC2A10	RefSeq_coding	4241	chr20	+	45338278	45364983		AAGAGCTAAAATAGATCCTAGGTGCTGGATGCTTTGTCATCCATGCGTGCACATATGGGT	81031	Hs.305971	GO:0055056|GO:0022891|GO:0005351|GO:0008643|GO:0015758|GO:0055085|GO:0005737|GO:0012505|GO:0016021|GO:0048471|GO:0005886	NP_110404	Solute carrier family 2 (facilitated glucose transporter), member 10	2364.83	6745.63	11.2952	12.6372
ASHG19A3A011721	-2.34009	-1.22657	2.34009	down	coding	NM_014698	TMEM63A	RefSeq_coding	4469	chr1	-	226033233	226070420		AGCGCACGCTCATGTCACTGAGTTCCAGCCGCTTTTAGAGTAAAGTCGTTTATCATCAAA	9725	Hs.119387	GO:0000166|GO:0016021|GO:0005765|GO:0016020	NP_055513	Transmembrane protein 63A	3273.06	8482.32	11.7503	12.9768
ASHG19A3A008223	-2.67532	-1.41971	2.67532	down	coding	NM_001033580	MYO19	RefSeq_coding	2256	chr17	-	34868917	34891305		CTACCGCCTTGCTTGTCTAGTACATTAAAACTTACAAGTCATGTTCACACTTCTCTGCTC	80179	Hs.302051	GO:0005524|GO:0003779|GO:0003774|GO:0000166|GO:0005737|GO:0005856|GO:0016020|GO:0005741|GO:0005739|GO:0016459	NP_079385	Myosin XIX	3361.15	9940.51	11.7892	13.2089
ASHG19A3A004761	-2.79777	-1.48428	2.79777	down	coding	NM_014756	CKAP5	RefSeq_coding	6534	chr11	-	46765083	46867843		CACAAGTATCCAAGCTCTGACACAGCTGTTTCAGATAGAGAGCCTTGCCCGGGAGGCCTC	9793	Hs.201253	GO:0005515|GO:0000086|GO:0000087|GO:0050658|GO:0051301|GO:0051297|GO:0030951|GO:0000278|GO:0000236|GO:0007051|GO:0005813|GO:0005829|GO:0005829|GO:0000930|GO:0015630	NP_055571	Cytoskeleton associated protein 5	178.197	566.67	7.56359	9.04787
ASHG19A3A013159	-2.20884	-1.14329	2.20884	down	coding	NM_014480	ZNF544	RefSeq_coding	3512	chr19	+	58740069	58775006		ATACTTTCCTTATTCAACATGAGAAAGCTCATGGGCAAGAAACTCTATGAATAACCAAGA	27300	Hs.438994	GO:0003677|GO:0046872|GO:0008270|GO:0006355|GO:0005622|GO:0005634	NP_055295	Zinc finger protein 544	708.164	1758.77	9.55464	10.6979
ASHG19A3A010999	-2.72129	-1.44429	2.72129	down	coding	NM_001005192	OR7G1	RefSeq_coding	1002	chr19	-	9225273	9226439		ACCCCTTCATCTACAGCCTGAGAAATAAGGAGATGAAGAAAGCTTTGAGGAAACTTATTG	125962	Hs.553576	GO:0004984|GO:0004872|GO:0050896|GO:0007608|GO:0016021|GO:0005886	NP_001005192	Olfactory receptor, family 7, subfamily G, member 1	159.85	493.74	7.40545	8.84974
ASHG19A3A023157	-2.13155	-1.09191	2.13155	down	coding	NM_013336	SEC61A1	RefSeq_coding	3656	chr3	+	127771211	127790525		TTGCAACTAACATCTGTGAAACCATCGTATGGAAGGCATTCAGCCCCACTACTGTCAACA	29927	Hs.518236	GO:0015450|GO:0005515|GO:0043022|GO:0045047|GO:0015031|GO:0055085|GO:0005783|GO:0005789|GO:0030176|GO:0016021|GO:0016020	NP_037468	Sec61 alpha 1 subunit (S. cerevisiae)	167.02	402.028	7.46908	8.56098
ASHG19A3A037041	-2.02176	-1.01561	2.02176	down	coding	NM_207305	FOXD4	RefSeq_coding	2208	chr9	-	116234	118417	NM_199135,NM_012184,NM_001085476,	CCTTGGAACTGGAAGTATTATTCCTAAGTCTAGTGCAAAATGCTTCTACTCTCTGTGTCT	2298	Hs.584759	GO:0008301|GO:0003690|GO:0010843|GO:0043565|GO:0003700|GO:0003705|GO:0003704|GO:0016566|GO:0016563|GO:0008134|GO:0048846|GO:0051216|GO:0060678|GO:0009790|GO:0048484|GO:0050935|GO:0048937|GO:0030318|GO:0007275|GO:0010553|GO:0001755|GO:0007389|GO:0007422|GO:0030513|GO:0090184|GO:0045944|GO:0051090|GO:0006355|GO:0048485|GO:0006351|GO:0005730|GO:0005634|GO:0005634|GO:0005667	NP_997188	Forkhead box D4	781.365	1783.97	9.69998	10.7156
ASHG19A3A009785	-2.15621	-1.1085	2.15621	down	coding	NM_001165994	GDPD1	RefSeq_coding	1171	chr17	+	57297827	57350381		CCACAAATGAGGACCTTAAGCTCTTCCTTACACTTAGCAATAAAGCATTGGCATTTCTGG	284161	Hs.631744	GO:0008889|GO:0016787|GO:0046872|GO:0006071|GO:0006629|GO:0005737|GO:0016021|GO:0016020	NP_872375	Glycerophosphodiester phosphodiesterase domain containing 1	73.026	176.213	6.2683	7.3768
ASHG19A3A021872	-3.7762	-1.91694	3.7762	down	coding	NM_001040100	C3orf57	RefSeq_coding	2306	chr3	-	161062580	161089871		AATTAATCACCGGAATTAGCCAGGTAGAATTTGAGTTTTAGCAAGAGTCCTGAGGGCGGG	165679	Hs.369104	GO:0005515|GO:0004758|GO:0030148|GO:0005783|GO:0005789|GO:0016021|GO:0016020|GO:0017059	NP_001035189	Chromosome 3 open reading frame 57	312.952	1335.58	8.37973	10.2967
ASHG19A3A037774	-2.09864	-1.06945	2.09864	down	coding	NM_001333	CTSL2	RefSeq_coding	1496	chr9	-	99794939	99801539		TGTTTCTTGATCTTCCCAAATCTGTGGATTGGAGAAAGAAAGGCTACGTGACGCCAGTGA	1515	Hs.621851	GO:0004177|GO:0004197|GO:0008234|GO:0030984|GO:0008233|GO:0042277|GO:0005515|GO:0032403|GO:0060008|GO:0048102|GO:0007154|GO:0009267|GO:0046697|GO:0010259|GO:0021675|GO:0006508|GO:0051384|GO:0009749|GO:0034698|GO:0014070|GO:0051789|GO:0007283|GO:0045177|GO:0005737|GO:0009897|GO:0005764|GO:0005902|GO:0043005|GO:0043204|GO:0005625|GO:0030141|GO:0005773	NP_001324	Cathepsin L2	598.053	1421.98	9.31666	10.3861
ASHG19A3A027139	-2.06594	-1.0468	2.06594	down	coding	NM_012081	ELL2	RefSeq_coding	6063	chr5	-	95220803	95297775		AGCAGCTGTGGTTGCCCCTGTTCTACACCAATTTCAGTTCAATAAAAATGTTAACTTTGC	22936	Hs.192221	GO:0016944|GO:0003702|GO:0006368|GO:0005634|GO:0008023	NP_036213	Elongation factor, RNA polymerase II, 2	476.399	1116.07	8.99204	10.0388
ASHG19A3A052264	-2.03116	-1.02231	2.03116	down	coding	NM_194272	RBPMS2	RefSeq_coding	2019	chr15	-	65032097	65067770		GCGGCTGTTGTCATTGCTGATCCTGTGAGAATGTGAAACTGGATAATATATGAAATGCAA	348093	Hs.436518	GO:0003676|GO:0000166	NP_919248	RNA binding protein with multiple splicing 2	321.707	740.601	8.41987	9.44218
ASHG19A3A025332	-2.28127	-1.18983	2.28127	down	coding	NM_022346	NCAPG	RefSeq_coding	4682	chr4	+	17812524	17846485		AAAGACTTTGCCAAAAATTGTAGGGCGCACCAAGGATGTGAAAGAGGCTGTCAGAAAGCT	64151	Hs.567567	GO:0005515|GO:0007049|GO:0051301|GO:0007067|GO:0007076|GO:0007076|GO:0005694|GO:0000796|GO:0005737|GO:0005634	NP_071741	Non-SMC condensin I complex, subunit G	176.656	456.362	7.55139	8.74122
ASHG19A3A043015	-2.32747	-1.21876	2.32747	down	coding	NM_153367	ZCCHC24	RefSeq_coding	4933	chr10	-	81142084	81205383		TGTATACGGCTCGCCTATAGAAATATAGCCTCTTCATGCTGTATTAAAAGGACTTTTAAA	219654	Hs.523080	GO:0046872|GO:0003676|GO:0008270	NP_699198	Zinc finger, CCHC domain containing 24	1669.52	4331.2	10.7894	12.0082
ASHG19A3A046828	-2.20678	-1.14194	2.20678	down	coding	NM_007173	PRSS23	RefSeq_coding	3806	chr11	+	86511490	86522271		GCCTTATGATTTTCTACCAAAAGTAAAAAGGGTTGTATTAAGTCAGAGGAAGATGCCTCT	11098	Hs.728981	GO:0008233|GO:0004252|GO:0006508|GO:0005576|GO:0005634	NP_009104	Protease, serine, 23	13623.7	32941	13.8058	14.9477
ASHG19A3A008711	-2.22831	-1.15595	2.22831	down	coding	NM_004396	DDX5	RefSeq_coding	3769	chr17	-	62494373	62502484		TTGCTCTAAGTGGATTGGATATGGTTGGAGTGGCACAGACTGGATCTGGGAAAACATTGT	1655	Hs.279806	GO:0005524|GO:0008026|GO:0003723|GO:0003724|GO:0016787|GO:0016818|GO:0000166|GO:0005515|GO:0003712|GO:0008380|GO:0016049|GO:0000398|GO:0071013|GO:0005730|GO:0005634|GO:0005634|GO:0030529	NP_004387	DEAD (Asp-Glu-Ala-Asp) box polypeptide 5	7227.95	17787.4	12.8933	14.0493
ASHG19A3A047719	-2.02752	-1.01972	2.02752	down	coding	NM_001130963	TMEM194A	RefSeq_coding	5632	chr12	-	57449426	57472574		CCTGCCTCAAAGTTGAGATTATAGAGAAGGACACCAAGTACAGTGTCATTGTGATCCGGA	23306	Hs.591040	GO:0003674|GO:0008150|GO:0016021|GO:0016020	NP_056072	Transmembrane protein 194A	72.4849	164.31	6.25847	7.27819
ASHG19A3A017086	-2.22088	-1.15113	2.22088	down	coding	NM_025139	ARMC9	RefSeq_coding	2235	chr2	+	232063341	232209912		AAACTGAAGAAGGATTTGATTTTGGGGAGTGACCGCTTGAAAGCCTTCTTGTTGCAGGCT	80210	Hs.471610	GO:0005488	NP_079415	Armadillo repeat containing 9	160.077	401.523	7.40787	8.55899
ASHG19A3A036328	-2.05509	-1.0392	2.05509	down	coding	NM_002293	LAMC1	RefSeq_coding	7889	chr1	+	182992594	183114726		AACACAGAGCGGTTGATTGAAATCGCATCCAGAGAACTTGAGAAAGCAAAAGTCGCTGCT	3915	Hs.609663	GO:0005201|GO:0043208|GO:0007411|GO:0007155|GO:0016477|GO:0007492|GO:0022617|GO:0031581|GO:0031175|GO:0050679|GO:0006461|GO:0034446|GO:0005605|GO:0005604|GO:0031012|GO:0005576|GO:0005576|GO:0005615|GO:0005606|GO:0005606|GO:0043259|GO:0043260	NP_002284	Laminin, gamma 1 (formerly LAMB2)	120.67	278.537	6.99826	8.03746
ASHG19A3A030569	-2.75763	-1.46343	2.75763	down	coding	NM_001134832	AHI1	RefSeq_coding	3674	chr6	-	135708921	135818903		CTTCGGATAAATGTCTCCACATTTCCTACTTCATAGAATTGTCAGAATCAACACAATACA	54806	Hs.386684	GO:0005912|GO:0030054|GO:0005929|GO:0005737|GO:0005856|GO:0005932	NP_060121	Abelson helper integration site 1	137.999	429.733	7.19137	8.6548
ASHG19A3A006090	-2.1198	-1.08393	2.1198	down	coding	NM_024586	OSBPL9	RefSeq_coding	2919	chr1	+	52082763	52254136	NM_148906,	GGAGAAGCACGCAGATGGAATGATAAGTACTATTAATCCCGTAGATGCAATATATCAACC	114883	Hs.21938	GO:0008289|GO:0006869|GO:0006810	NP_683707	Oxysterol binding protein-like 9	107.51	254.759	6.8275	7.91142
ASHG19A3A003199	-2.46743	-1.30301	2.46743	down	coding	NM_001164194	PLIN3	RefSeq_coding	2304	chr19	-	4838345	4867780		CGAGAAGGAGCCGCCCAAGCCAGAGCAGGTCGAGTCCCGGGCGCTCACCATGTTCCGGGA	10226	Hs.140452	GO:0005515|GO:0016192|GO:0005794|GO:0005737|GO:0005768|GO:0010008|GO:0043231|GO:0005811|GO:0016020	NP_005808	Perilipin 3	102.224	281.743	6.751	8.05401
ASHG19A3A040191	-2.6468	-1.40425	2.6468	down	coding	NM_000169	GLA	RefSeq_coding	1418	chrX	-	100652778	100663001		TTTTAACCAGGAGAGAATTGTTGATGTTGCTGGACCAGGGGGTTGGAATGACCCAGATAT	2717	Hs.69089	GO:0004557|GO:0004557|GO:0003824|GO:0043169|GO:0016787|GO:0004553|GO:0005515|GO:0042803|GO:0005102|GO:0016139|GO:0046479|GO:0046477|GO:0045019|GO:0051001|GO:0009311|GO:0005794|GO:0005737|GO:0005576|GO:0005576|GO:0005764|GO:0005764	NP_000160	Galactosidase, alpha	8452.01	24621.7	13.1159	14.5201
ASHG19A3A023330	-2.08787	-1.06203	2.08787	down	coding	NM_001080415	SR140	RefSeq_coding	7464	chr3	+	142720371	142779567		AAGGCAGATTAAGTCGATTTGAACCTCCTCAGTCAGATTCTGATGGTCAGCGTCGTTCTA	23350	Hs.596572	GO:0003723|GO:0000166|GO:0006396|GO:0005634	NP_001073884	U2-associated SR140 protein	252.111	595.917	8.06204	9.12407
ASHG19A3A003057	-2.28236	-1.19052	2.28236	down	coding	NM_001160234	ATP1A1	RefSeq_coding	3587	chr1	+	116925991	116947394		gttagtaacttgcctaaggatacactgctgGTTGGACGTGATAAGTATGAGCCTGCAGCT	476	Hs.371889	GO:0005524|GO:0015662|GO:0016787|GO:0016820|GO:0046872|GO:0015077|GO:0000166|GO:0005515|GO:0005391|GO:0006754|GO:0034220|GO:0034220|GO:0006813|GO:0006814|GO:0055085|GO:0016021|GO:0042470|GO:0005624|GO:0005886|GO:0005886|GO:0005890	NP_001153706	ATPase, Na+/K+ transporting, alpha 1 polypeptide	66.7399	170.512	6.13917	7.32969
ASHG19A3A053806	-2.18778	-1.12947	2.18778	down	coding	NM_002080	GOT2	RefSeq_coding	2473	chr16	-	58741034	58768246		CAAAAAGATGAATCTGGGAGTTGGTGCCTACCGGGATGATAATGGAAAGCCTTACGTTCT	2806	Hs.599470	GO:0004069|GO:0004069|GO:0004069|GO:0005515|GO:0030170|GO:0006103|GO:0006532|GO:0006533|GO:0006531|GO:0009058|GO:0005975|GO:0008652|GO:0034641|GO:0015908|GO:0006094|GO:0006006|GO:0019551|GO:0019550|GO:0006536|GO:0006107|GO:0045471|GO:0006810|GO:0005743|GO:0005759|GO:0005739|GO:0005739|GO:0005886	NP_002071	Glutamic-oxaloacetic transaminase 2, mitochondrial (aspartate aminotransferase 2)	144.723	356.906	7.25906	8.38853
ASHG19A3A009071	-3.85832	-1.94797	3.85832	down	coding	NM_001406	EFNB3	RefSeq_coding	3236	chr17	+	7608519	7614691		TGGCGGGGTATGCCGTCACCTCAGTAGTTTTACTGTAAAAGGGAAATTTGAACAACAAAA	1949	Hs.26988	GO:0046875|GO:0005005|GO:0007628|GO:0016198|GO:0030154|GO:0007267|GO:0048013|GO:0044419|GO:0007275|GO:0007399|GO:0005887|GO:0016020	NP_001397	Ephrin-B3	553.467	2432.38	9.20905	11.157
ASHG19A3A004065	-2.04249	-1.03033	2.04249	down	coding	NM_002733	PRKAG1	RefSeq_coding	1707	chr12	-	49396055	49412592		GGTTGTATTTGATACGTCCCTGCAGGTGAAGAAAGCTTTTTTTGCTTTGGTGACTAACGG	5571	Hs.530862	GO:0016208|GO:0004691|GO:0008603|GO:0005515|GO:0019901|GO:0007050|GO:0006633|GO:0008286|GO:0045860|GO:0051291|GO:0006468|GO:0050790|GO:0046320|GO:0006110|GO:0007165|GO:0007283|GO:0031588|GO:0005829|GO:0005829|GO:0005634	NP_002724	Protein kinase, AMP-activated, gamma 1 non-catalytic subunit	441.714	1022.31	8.88431	9.91464
ASHG19A3A001053	-3.08049	-1.62316	3.08049	down	coding	NM_001018056	VLDLR	RefSeq_coding	3562	chr9	+	2621792	2654485		AATGTAGAGGAAAATGGCCGAGACTGTCAAAGGATCAATGTGACCACAGCAGTATCAGAG	7436	Hs.370422	GO:0034185|GO:0005509|GO:0005041|GO:0005515|GO:0004872|GO:0030229|GO:0008203|GO:0006897|GO:0006869|GO:0007613|GO:0007399|GO:0007165|GO:0008202|GO:0006810|GO:0034447|GO:0005905|GO:0016021|GO:0005624|GO:0005886|GO:0034361	NP_003374	Very low density lipoprotein receptor	454.31	1585.35	8.92396	10.5471
ASHG19A3A046754	-2.12095	-1.08471	2.12095	down	coding	NM_006591	POLD3	RefSeq_coding	3430	chr11	+	74303628	74353765		CAGGCCTGAAAAAATCCAGCAAAAAAGCAGAGCCTGTTAAGGTGCTGCAGAAGGAAAAAA	10714	Hs.82502	GO:0003887|GO:0016779|GO:0005515|GO:0016740|GO:0006281|GO:0006271|GO:0000731|GO:0000084|GO:0006284|GO:0006298|GO:0000278|GO:0006289|GO:0006297|GO:0006297|GO:0000723|GO:0000722|GO:0032201|GO:0006283|GO:0043625|GO:0005654|GO:0005654|GO:0005634	NP_006582	Polymerase (DNA-directed), delta 3, accessory subunit	84.0483	199.286	6.4678	7.55251
ASHG19A3A038201	-2.14447	-1.10062	2.14447	down	coding	NM_015447	CAMSAP1	RefSeq_coding	7650	chr9	-	138700333	138799005		AACAAGCCGATTATTCACAATGCCATATCCCATTGCTGCCTGGCTGGAAAAGTGAACGAA	157922	Hs.522493	GO:0005737|GO:0005856|GO:0005874	NP_056262	Calmodulin regulated spectrin-associated protein 1	222.666	539.764	7.88127	8.9819
ASHG19A3A052041	-2.08789	-1.06205	2.08789	down	coding	NM_002651	PI4KB	RefSeq_coding	3471	chr1	-	151264412	151298724		ATAGTGGCATGATTGAACCAGTGGTCAATGCTGTGTCCATCCATCAGGTGAAGAAACAGT	5298	Hs.632465	GO:0004430|GO:0005524|GO:0000166|GO:0005515|GO:0016740|GO:0006661|GO:0046854|GO:0048015|GO:0006898|GO:0007165|GO:0005794|GO:0005737|GO:0012505|GO:0005783|GO:0005768|GO:0016020|GO:0005741|GO:0005739|GO:0048471|GO:0030867	NP_002642	Phosphatidylinositol 4-kinase, catalytic, beta	486.313	1152.92	9.02435	10.0864
ASHG19A3A053151	-2.73462	-1.45134	2.73462	down	coding	NM_021214	FAM108C1	RefSeq_coding	2408	chr15	+	80987651	81047960		TTGTGTACTGTTGCTTGGATGCGGCACAGTGGTTGGTAATGGAATAAAGGATGCATGGAT	58489	Hs.459072	GO:0016787|GO:0008236|GO:0006508	NP_067037	Family with sequence similarity 108, member C1	10812.5	32344.2	13.473	14.9243
ASHG19A3A000861	-3.19919	-1.67771	3.19919	down	coding	NM_001007468	SMARCB1	RefSeq_coding	1690	chr22	+	24129149	24176704		AAGAGAGGAAGAAAATAGTTGCATCGTCACATGATCACGGATACACGACTCTAGCCACCA	6598	Hs.534350	GO:0002039|GO:0005515|GO:0015074|GO:0007049|GO:0006338|GO:0044419|GO:0007399|GO:0010552|GO:0051091|GO:0006357|GO:0045090|GO:0016514|GO:0016585|GO:0071565|GO:0071564|GO:0000228|GO:0005730|GO:0005730|GO:0005654|GO:0005634	NP_003064	SWI/SNF related, matrix associated, actin dependent regulator of chromatin, subfamily b, member 1	140.449	508.308	7.21466	8.89236
ASHG19A3A024624	-2.62582	-1.39277	2.62582	down	coding	NM_052864	TIFA	RefSeq_coding	3090	chr4	-	113196782	113207059		GGGCCAGAAAAATCTTGTACAGAATAATGATTTCTCCTAATGTAAATCTTGGAAAGGGTT	92610	Hs.310640	GO:0005515|GO:0007249	NP_443096	TRAF-interacting protein with forkhead-associated domain	1044.08	3076.4	10.1107	11.5035
ASHG19A3A044061	-2.91281	-1.54241	2.91281	down	coding	NM_005376	MYCL1	RefSeq_coding	2038	chr1	-	40365285	40367687		TTGCTTTCTACACCAAGAGTTTATGTTTGTTTAATGGCTGGAAAGAGAATCTTGAGATCA	4610	Hs.437922	GO:0003677|GO:0003677|GO:0003700|GO:0030528|GO:0006355|GO:0006351|GO:0005634	NP_005367	V-myc myelocytomatosis viral oncogene homolog 1, lung carcinoma derived (avian)	74.3828	242.593	6.29535	7.83776
ASHG19A3A026799	-4.93477	-2.30298	4.93477	down	coding	NM_003711	PPAP2A	RefSeq_coding	1638	chr5	-	54720684	54830873		GAAGACACCATACCTTATGCGTTATTAGGTGGAATAATCATTCCATTCAGTATTATCGTT	8611	Hs.696231	GO:0016787|GO:0008195|GO:0008195|GO:0042392|GO:0007205|GO:0030521|GO:0008354|GO:0006629|GO:0008285|GO:0046839|GO:0019216|GO:0006665|GO:0030518|GO:0005887|GO:0005624|GO:0005886	NP_795714	Phosphatidic acid phosphatase type 2A	319.171	1775.64	8.40729	10.7103
ASHG19A3A052194	-3.05712	-1.61217	3.05712	down	coding	NM_001110	ADAM10	RefSeq_coding	3927	chr15	-	58888509	59042177		CTTCGATGCAAATCAACCAGAGGGAAGAAAATGCAAACTGAAACCTGGGAAACAGTGCAG	102	Hs.578508	GO:0017124|GO:0004175|GO:0005178|GO:0046872|GO:0004222|GO:0008237|GO:0008237|GO:0008237|GO:0008233|GO:0005515|GO:0042803|GO:0019901|GO:0005102|GO:0008270|GO:0007220|GO:0007219|GO:0007219|GO:0051088|GO:0007267|GO:0051089|GO:0007173|GO:0001701|GO:0007229|GO:0006509|GO:0006509|GO:0042117|GO:0007162|GO:0007162|GO:0010820|GO:0030307|GO:0030335|GO:0008284|GO:0006468|GO:0006508|GO:0034612|GO:0005794|GO:…	NP_001101	ADAM metallopeptidase domain 10	108.969	374.496	6.84694	8.45911
ASHG19A3A053365	-2.11853	-1.08306	2.11853	down	coding	NM_015327	SMG5	RefSeq_coding	4577	chr1	-	156219016	156252620		AGCCAAAATGTACCACCAACTGAAGAAGTGTGAGACTCGGAAACTGTCTCCTGGCAAAAA	23381	Hs.516837	GO:0005515|GO:0051721|GO:0006406|GO:0000184|GO:0035303|GO:0005737|GO:0005634	NP_056142	Smg-5 homolog, nonsense mediated mRNA decay factor (C. elegans)	88.4282	208.45	6.53705	7.62012
ASHG19A3A042849	-3.38433	-1.75887	3.38433	down	coding	NM_178505	TMEM26	RefSeq_coding	5155	chr10	-	63166400	63213208		TTTGTGGGGACAGCGGCTGACATACTGGAATTCACAAGTGAGACCCTAGAAGAACAAAAT	219623	Hs.623955	GO:0016021|GO:0016020	NP_848600	Transmembrane protein 26	160.626	617.596	7.41308	9.17196
ASHG19A3A017492	-2.81496	-1.49311	2.81496	down	coding	NM_020531	C20orf3	RefSeq_coding	2251	chr20	-	24943580	24973425		ACAGGCAGAAAGGCTGTTTGAAAATCAACTTGTTGGACCGGAGTCCATAGCACATATTGG	57136	Hs.472330	GO:0004064|GO:0016844|GO:0008150|GO:0009058|GO:0009986|GO:0016021|GO:0016020	NP_065392	Chromosome 20 open reading frame 3	175.585	561.089	7.54143	9.03454
ASHG19A3A050544	-3.86213	-1.9494	3.86213	down	coding	NM_001145442	P704P	RefSeq_coding	6666	chr14	-	19983953	20020272	NR_027480,NM_207355,NM_174981,NM_001137671,NM_001136213,NM_001099771,NM_001083538,NM_001005356,	TTCTCAAGATCTATCTGGACAGACGGCCAGAGAGTATGCTGTTTCTAGTCGTCATAATGT	641455	Hs.654289		NP_001138914	POTE ankyrin domain family, member M	263.995	1146.3	8.12894	10.0783
ASHG19A3A010064	-3.35906	-1.74806	3.35906	down	coding	NM_012140	SLC25A10	RefSeq_coding	1960	chr17	+	79679370	79688041		TTTTGTGTTTCTGGAACAGCTACGCAAAAACTTTGGCATCAAAGTGCCATCCTGACCAGC	1468	Hs.548187	GO:0015297|GO:0005310|GO:0015140|GO:0015114|GO:0005515|GO:0015141|GO:0015116|GO:0015117|GO:0005975|GO:0006835|GO:0006094|GO:0006006|GO:0006839|GO:0006810|GO:0016021|GO:0016020|GO:0005743|GO:0005739|GO:0005730|GO:0005634	NP_036272	Solute carrier family 25 (mitochondrial carrier; dicarboxylate transporter), member 10	69.4361	261.144	6.19663	7.94468
ASHG19A3A010822	-2.59498	-1.37572	2.59498	down	coding	NM_000156	GAMT	RefSeq_coding	1086	chr19	-	1397088	1401552		AGCTTCTCTGTGAGGGTCACTGCTGCCCACTGCAGGGTCCCTGAGGTGAAGTAAACGCCG	2593	Hs.81131	GO:0030731|GO:0008168|GO:0016740|GO:0034641|GO:0006601|GO:0006600|GO:0032259|GO:0032259|GO:0006936|GO:0005829	NP_620279	Guanidinoacetate N-methyltransferase	188.362	553.134	7.63928	9.015
ASHG19A3A014047	-2.46614	-1.30226	2.46614	down	coding	NM_004418	DUSP2	RefSeq_coding	1708	chr2	-	96808916	96811179		GGCAGGGGTTGGAAACTTAGCACTTTATATTTATACAGAACATTCAGGATATGTCAATAA	1844	Hs.1183	GO:0017017|GO:0016787|GO:0051019|GO:0004725|GO:0008330|GO:0001706|GO:0000188|GO:0006470|GO:0042981|GO:0005654|GO:0005634	NP_004409	Dual specificity phosphatase 2	2287.07	6375.36	11.2489	12.5512
ASHG19A3A005833	-2.27847	-1.18807	2.27847	down	coding	NM_134441	RLN2	RefSeq_coding	788	chr9	-	5299867	5304580	NM_006911,	CCTCAGACACCTAGACCAGTGGCAGAAATTGTGCCATCCTTCATCAACAAAGATACAGAA	6019	Hs.127032	GO:0005179|GO:0007565|GO:0005576|GO:0005576	NP_604390	Relaxin 2	245.52	633.669	8.02295	9.21101
ASHG19A3A030460	-7.6771	-2.94056	7.6771	down	coding	NM_005907	MAN1A1	RefSeq_coding	4139	chr6	-	119499266	119670926		GAAAAACCACAAGGCCTTTATCCTAACTATCTGAATCCCAGTAGTGGACAGTGGGGTCAA	4121	Hs.102788	GO:0005509|GO:0016798|GO:0015923|GO:0004571|GO:0044267|GO:0008152|GO:0043687|GO:0018279|GO:0005793|GO:0005794|GO:0000139|GO:0005783|GO:0016021|GO:0016020|GO:0005624	NP_005898	Mannosidase, alpha, class 1A, member 1	203.074	1749.76	7.75097	10.6915
ASHG19A3A002454	-2.16472	-1.11418	2.16472	down	coding	NM_001137559	ANAPC5	RefSeq_coding	2364	chr12	-	121746049	121792012		GAAGGCAGTACATTTTGGGTTACCGAGAGCTTTTGCTGGGAAGACGGCAAACAAGCTGAT	51433	Hs.7101	GO:0005488|GO:0004842|GO:0000086|GO:0031145|GO:0031145|GO:0000075|GO:0051301|GO:0000090|GO:0000278|GO:0007094|GO:0051436|GO:0051437|GO:0070979|GO:0016567|GO:0051439|GO:0006511|GO:0005680|GO:0005829|GO:0005829|GO:0005654|GO:0005654	NP_057321	Anaphase promoting complex subunit 5	901.743	2208	9.90112	11.0153
ASHG19A3A031231	-2.21197	-1.14533	2.21197	down	coding	NM_004091	E2F2	RefSeq_coding	5273	chr1	-	23832921	23857713		GCACCATGTAAGCCTCCTTGTATTGAGATAATTGGGCATTAAACATTAAACTGCAGCTCT	1870	Hs.194333	GO:0003677|GO:0003702|GO:0005515|GO:0003700|GO:0008134|GO:0000080|GO:0006915|GO:0000278|GO:0051726|GO:0006355|GO:0006367|GO:0006351|GO:0005654|GO:0005634|GO:0005667	NP_004082	E2F transcription factor 2	3993.01	9825.49	12.0385	13.1838
ASHG19A3A004666	-2.35713	-1.23703	2.35713	down	coding	NM_013269	CLEC2D	RefSeq_coding	5167	chr12	+	9822308	9852039		AATGGATAAATGGTACTGAATGGACAAGACAGTTTCCTATCCTGGGAGCAGGAGAGTGTG	29121	Hs.268326	GO:0005488|GO:0005529|GO:0004888|GO:0007166|GO:0009986|GO:0005783|GO:0005887|GO:0005624|GO:0005886	NP_037401	C-type lectin domain family 2, member D	280.298	747.563	8.21812	9.45515
ASHG19A3A039505	-2.59032	-1.37313	2.59032	down	coding	NM_024757	EHMT1	RefSeq_coding	5123	chr9	+	140513443	140730576		TCAGACTCAGAAGCCGACGTTCGAGAGGAAGATTCTTACCTCTTTGATCTCGACAATAAG	79813	Hs.495511	GO:0046976|GO:0046974|GO:0018024|GO:0046872|GO:0008168|GO:0002039|GO:0016279|GO:0016740|GO:0008270|GO:0006306|GO:0016568|GO:0009790|GO:0070734|GO:0051567|GO:0034968|GO:0016571|GO:0018027|GO:0018026|GO:0005694|GO:0005634|GO:0005634	NP_079033	Euchromatic histone-lysine N-methyltransferase 1	108.944	316.565	6.84641	8.21954
ASHG19A3A003009	-2.00145	-1.00104	2.00145	down	coding	NM_001159629	SLC27A2	RefSeq_coding	2249	chr15	+	50474392	50528588		CCTTATACATTTATACTTCTGGAACCACAGGTGCTACTCTTGCCTTGCGGACTAAATTTT	11001	Hs.11729	GO:0005524|GO:0015245|GO:0016874|GO:0004467|GO:0000166|GO:0050197|GO:0070251|GO:0031957|GO:0006699|GO:0008206|GO:0044255|GO:0001561|GO:0001676|GO:0042760|GO:0000038|GO:0005783|GO:0005789|GO:0016021|GO:0016020|GO:0005792|GO:0005739|GO:0005782|GO:0005778|GO:0005777	NP_003636	Solute carrier family 27 (fatty acid transporter), member 2	208.098	471.891	7.78693	8.78798
CUST_41_PI426249100	-2.19463	-1.13398	2.19463	down	coding	NM_024017_Exon2-	NM_024017	HOX cluster	1972	chr17	-	46698525	46700497	NM_024017,	TTTCTTTGGGGGTGATTGTCTCGCTTGTTTTCAGTTGTCGATTATATGGGAGGGTTCTGG						80.4456	197.32	6.40591	7.53989
ASHG19A3A033828	-3.7156	-1.8936	3.7156	down	coding	NM_017760	NCAPG2	RefSeq_coding	3950	chr7	-	158424002	158497520		TTGGAAAATATGTCCCATGGAGCACATTCTGGTTCGTCTGGAAACTGATTCTCGACCTGT	54892	Hs.18616	GO:0005488|GO:0035064|GO:0007049|GO:0051301|GO:0030261|GO:0007067|GO:0005730|GO:0005634	NP_060230	Non-SMC condensin II complex, subunit G2	88.0485	365.651	6.53109	8.42469
ASHG19A3A046730	-2.33753	-1.22499	2.33753	down	coding	NM_033388	ATG16L2	RefSeq_coding	2160	chr11	+	72525450	72540678		ATCAATGTCCTTTCCTACTGTAATGACGTGGTGTGTGGGGACCATATCATCATTAGTGGC	89849	Hs.653186	GO:0005515|GO:0006914|GO:0015031|GO:0005737	NP_203746	ATG16 autophagy related 16-like 2 (S. cerevisiae)	336.657	889.68	8.48382	9.70881
ASHG19A3A010059	-2.95991	-1.56555	2.95991	down	coding	NM_031945	TSPAN10	RefSeq_coding	1613	chr17	+	79609348	79615778		GGGGAGATAGTAAATGTTTTATTCGGGTGTATCATTCATACAGTAAAGACACCAATCTTC	83882	Hs.208219	GO:0016021|GO:0016020	NP_114151	Tetraspanin 10	643.781	2168.46	9.42309	10.9886
ASHG19A3A011688	-2.69305	-1.42924	2.69305	down	coding	NM_178449	PTH2	RefSeq_coding	459	chr19	-	49925670	49926698		TGGTGTTGGATGCGCCCTGAGCGCGCTGCCCGTCCCCATCTTAATAAAGACCATGCCCTG	113091	Hs.339845	GO:0007218|GO:0005576|GO:0005576	NP_848544	Parathyroid hormone 2	498.415	1525.42	9.05938	10.4886
ASHG19A3A024249	-2.08074	-1.05709	2.08074	down	coding	NM_001812	CENPC1	RefSeq_coding	3349	chr4	-	68337988	68411256		TGTCACGAAAAGTCGAAGAATTTCCAGGCGTCCATCTGATTGGTGGGTGGTAAAATCAGA	1060	Hs.479867	GO:0003677|GO:0000087|GO:0000278|GO:0000236|GO:0000777|GO:0000780|GO:0005829|GO:0000776|GO:0005634	NP_001803	Centromere protein C 1	396.708	936.782	8.72328	9.78038
ASHG19A3A014838	-2.07257	-1.05142	2.07257	down	coding	NM_152387	KCTD18	RefSeq_coding	2959	chr2	-	201353685	201374792		AGGACTCCATGTTGGCATCTATGTTCAGTGGTCGCTTTCCTCTAAAAACAGATGAGTCAG	130535	Hs.605775	GO:0005249|GO:0006813|GO:0016020|GO:0008076	NP_689600	Potassium channel tetramerisation domain containing 18	132.2	307.922	7.129	8.18042
ASHG19A3A048064	-2.46866	-1.30373	2.46866	down	coding	NM_015002	FBXO21	RefSeq_coding	4227	chr12	-	117581585	117628300		TTGATTCGCAGAACAGGAATCCCAATCAGCATGTCTCTGCTCTATTTGACAATTGCTCGG	23014	Hs.728146	GO:0004842|GO:0016567|GO:0006511|GO:0000151	NP_296373	F-box protein 21	93.7426	257.715	6.62299	7.92671
ASHG19A3A022174	-2.01546	-1.01111	2.01546	down	coding	NM_004930	CAPZB	RefSeq_coding	1728	chr1	-	19665266	19812066		ATCCTCATAAAGAAGGCTGGAGATGGATCAAAGAAGATCAAAGGCTGCTGGGATTCCATC	832	Hs.432760	GO:0003779|GO:0005515|GO:0030036|GO:0051693|GO:0007596|GO:0006928|GO:0008290|GO:0071203|GO:0015629|GO:0005737|GO:0005856|GO:0005829	NP_004921	Capping protein (actin filament) muscle Z-line, beta	1438.71	3256.35	10.5775	11.5886
ASHG19A3A016604	-2.03945	-1.02818	2.03945	down	coding	NM_015001	SPEN	RefSeq_coding	12227	chr1	+	16174358	16266950		AAAGATGAGCCCCGTAAAAGTTTTGGCATCAAGGTCCAGAATCTTCCAGTACGCTCTACA	23013	Hs.725959	GO:0003677|GO:0003723|GO:0000166|GO:0005515|GO:0003700|GO:0003697|GO:0016563|GO:0003714|GO:0016564|GO:0007219|GO:0044419|GO:0045892|GO:0006357|GO:0005730|GO:0005634	NP_055816	Spen homolog, transcriptional regulator (Drosophila)	138.831	318.401	7.19963	8.22781
ASHG19A3A052316	-2.91434	-1.54317	2.91434	down	coding	NM_014624	S100A6	RefSeq_coding	683	chr1	-	153507075	153508717		CCCTCTGGGGGTCCTCTCTGAGTCAAATCCAGTGGTGGGTAATTGTACAATAAATTTTTT	6277	Hs.275243	GO:0048154|GO:0005509|GO:0005509|GO:0048306|GO:0015075|GO:0005515|GO:0042803|GO:0042803|GO:0005523|GO:0008270|GO:0007409|GO:0048146|GO:0007165|GO:0005737|GO:0005737|GO:0005829|GO:0031234|GO:0005635|GO:0005635|GO:0005634|GO:0048471|GO:0005886|GO:0001726	NP_055439	S100 calcium binding protein A6	33039.7	98614.5	15.0575	16.6007
ASHG19A3A018643	-2.37774	-1.24959	2.37774	down	coding	NM_003489	NRIP1	RefSeq_coding	7556	chr21	-	16333555	16437126		TTCAACAGCCTTCTCAATTTTCTTTCTCAGAAAGCAGAGGCTCAGAGCTTGGAGACAGAC	8204	Hs.155017	GO:0050681|GO:0030331|GO:0035259|GO:0042826|GO:0035257|GO:0005515|GO:0005102|GO:0046965|GO:0003713|GO:0003713|GO:0003714|GO:0030521|GO:0019915|GO:0000122|GO:0001543|GO:0030728|GO:0045944|GO:0045893|GO:0000118|GO:0005634	NP_003480	Nuclear receptor interacting protein 1	350.058	942.044	8.54211	9.7917
ASHG19A3A030049	-2.75824	-1.46375	2.75824	down	coding	NM_001498	GCLC	RefSeq_coding	3717	chr6	-	53362139	53409831		TAAGCCGGATCATATTTACATGGATGCCATGGGATTTGGAATGGGCAATTGCTGTCTCCA	2729	Hs.654465	GO:0043531|GO:0005524|GO:0050662|GO:0016595|GO:0004357|GO:0004357|GO:0016874|GO:0000287|GO:0000166|GO:0046982|GO:0019852|GO:0006916|GO:0045454|GO:0006534|GO:0006536|GO:0006750|GO:0006750|GO:0006750|GO:0043524|GO:0031397|GO:0032436|GO:0050880|GO:0051900|GO:0046685|GO:0009408|GO:0009725|GO:0051409|GO:0006979|GO:0009410|GO:0006805|GO:0005737|GO:0005829|GO:0017109	NP_001489	Glutamate-cysteine ligase, catalytic subunit	139.538	434.189	7.2067	8.67045
ASHG19A3A024549	-2.33086	-1.22086	2.33086	down	coding	NM_005908	MANBA	RefSeq_coding	3311	chr4	-	103552643	103682151		AATTGCTGAGGAGATGTGGGAATTGCACACGGGAAAGCTGTGTGGTTTCCTTTTACCTTT	4126	Hs.480415	GO:0004567|GO:0043169|GO:0004553|GO:0005537|GO:0005975|GO:0006516|GO:0006464|GO:0005764|GO:0005625	NP_005899	Mannosidase, beta A, lysosomal	671.197	1761.64	9.47893	10.6998
ASHG19A3A001041	-2.56839	-1.36086	2.56839	down	coding	NM_001017958	OS9	RefSeq_coding	2824	chr12	+	58087737	58115338	NM_001017957,	TGCTTCCGTCAGACCGAGACCGGCTCCGTTCGGAGACAGAGAAAGAGCTGGACCCAGATG	10956	Hs.527861	GO:0001948|GO:0005515|GO:0005529|GO:0030433|GO:0006621|GO:0016567|GO:0042787|GO:0034976|GO:0000836|GO:0005783|GO:0005788	NP_006803	Osteosarcoma amplified 9, endoplasmic reticulum lectin	249.023	722.087	8.04496	9.40582
ASHG19A3A031581	-2.16965	-1.11746	2.16965	down	coding	NM_001253	CDC5L	RefSeq_coding	3012	chr6	+	44355301	44414779		AGTGGTCTAGGATTGCCTCATTGCTGCATAGAAAATCAGCAAAGCAGTGCAAAGCCAGAT	988	Hs.485471	GO:0003677|GO:0003723|GO:0005515|GO:0019904|GO:0008380|GO:0007049|GO:0000398|GO:0006355|GO:0071013|GO:0005737|GO:0016607|GO:0005730|GO:0005730|GO:0005634|GO:0005634	NP_001244	CDC5 cell division cycle 5-like (S. pombe)	80.1798	194.393	6.40127	7.51873
ASHG19A3A004023	-2.75341	-1.46122	2.75341	down	coding	NM_002388	MCM3	RefSeq_coding	3143	chr6	-	52128811	52149582		GAGGCTACACCTCTGGGACCTTCAGGACTGTCCTGATTGCCTGTAATGTTAAGCAGATGA	4172	Hs.179565	GO:0005524|GO:0003677|GO:0017111|GO:0000166|GO:0005515|GO:0006260|GO:0006271|GO:0006270|GO:0000082|GO:0000216|GO:0000084|GO:0000075|GO:0000278|GO:0042555|GO:0005658|GO:0005813|GO:0005737|GO:0043231|GO:0005730|GO:0005654|GO:0005654|GO:0005634|GO:0048471	NP_002379	Minichromosome maintenance complex component 3	103.169	318.241	6.76576	8.22698
ASHG19A3A017376	-3.53518	-1.82178	3.53518	down	coding	NM_017714	TASP1	RefSeq_coding	2368	chr20	-	13370036	13619583		AGTTGGAAACAAAGCAGTCCTATAAAGAGAAACGAGGAGGCTTTGTGTTGGTGCATGCAG	55617	Hs.348297	GO:0008233|GO:0004298|GO:0033345|GO:0045893|GO:0051604	NP_060184	Taspase, threonine aspartase, 1	162.513	649.038	7.42774	9.24952
ASHG19A3A014999	-2.0585	-1.04159	2.0585	down	coding	NM_022152	TMBIM1	RefSeq_coding	2375	chr2	-	219138916	219157280		TGGGGGCAGAAATCAAATCAGCCCAAGGATATAGTTAGGATTAATTACTTAATAGAGAAA	64114	Hs.591605	GO:0016021|GO:0016020	NP_071435	Transmembrane BAX inhibitor motif containing 1	144.387	334.056	7.25505	8.29664
ASHG19A3A006457	-2.31102	-1.20853	2.31102	down	coding	NM_177534	SULT1A1	RefSeq_coding	1598	chr16	-	28616917	28620649	NM_177530,NM_177529,NM_001055,	TTGAGTTCAAAGCCCCAGGGATTCCCTCAGGGATGGAGACTCTGAAAGACACACCGGCCC	6817	Hs.567342	GO:0004062|GO:0047894|GO:0008146|GO:0016740|GO:0050427|GO:0009308|GO:0006584|GO:0009812|GO:0008202|GO:0051923|GO:0006805|GO:0006805|GO:0005737|GO:0005829	NP_803880	Sulfotransferase family, cytosolic, 1A, phenol-preferring, member 1	71.0329	183.616	6.22958	7.43811
ASHG19A3A016375	-2.15985	-1.11093	2.15985	down	coding	NM_138770	CCDC74A	RefSeq_coding	1472	chr2	+	132285491	132291237	NM_207310,	ACACGATGAAGCAGGTATCGCCTTACCTGTTGAAACTGAAAATAAAGCTTGTTTATTTCC	90557	Hs.351461		NP_620125	Coiled-coil domain containing 74A	14959.7	34945.1	13.932	15.0429
ASHG19A3A006881	-2.05088	-1.03625	2.05088	down	coding	NM_199413	PRC1	RefSeq_coding	3091	chr15	-	91509273	91537804		TTGCCAGCACCTATTCTGAGTTTGCGCGAGAACTTTCAAAGGCTTCCAAATCTGATGCTA	9055	Hs.366401	GO:0005515|GO:0007049|GO:0000910|GO:0000022|GO:0005737|GO:0005856|GO:0005634|GO:0005876|GO:0000922	NP_955446	Protein regulator of cytokinesis 1	2504.85	5785.4	11.38	12.4162
ASHG19A3A004891	-2.11489	-1.08058	2.11489	down	coding	NM_016325	ZNF274	RefSeq_coding	2743	chr19	+	58694395	58724927		AACTACAGGAACCTGGTCTCAGTGGAGTATCCTGAGCTCCAGCTGGACCCTAAATTGGAT	10782	Hs.83761	GO:0046872|GO:0005515|GO:0043565|GO:0003700|GO:0003714|GO:0008270|GO:0006355|GO:0006351|GO:0016032|GO:0005813|GO:0005737|GO:0005622|GO:0005730|GO:0005634	NP_598009	Zinc finger protein 274	73.4328	173.615	6.27543	7.35601
ASHG19A3A005879	-5.56197	-2.47559	5.56197	down	coding	NM_138634	MSMB	RefSeq_coding	466	chr10	+	51549552	51562590		AGGGAGTTCCAGGAGATTCAACCAGGATGTTTCTACACCTGTGGGTTATGACAAAGACAA	4477	Hs.255462	GO:0003674|GO:0008150|GO:0005576|GO:0005615|GO:0005634	NP_619540	Microseminoprotein, beta-	612.67	3821.27	9.34773	11.8233
ASHG19A3A003945	-2.05086	-1.03623	2.05086	down	coding	NM_001793	CDH3	RefSeq_coding	4276	chr16	+	68678150	68732957		TGGACGGCAGAGGTCAACGAGGAAGGTGACACAGTGGTCTTGTCCCTGAAGAAGTTCCTG	1001	Hs.191842	GO:0005509|GO:0034332|GO:0007155|GO:0034329|GO:0045216|GO:0007156|GO:0050896|GO:0007601|GO:0005913|GO:0016021|GO:0005886|GO:0005886	NP_001784	Cadherin 3, type 1, P-cadherin (placental)	74.7624	171.648	6.30326	7.33949
ASHG19A3A010870	-2.20621	-1.14157	2.20621	down	coding	NM_174983	C19orf28	RefSeq_coding	2138	chr19	-	3544197	3557571		AGGAAGTAGGAATCCCAGAAGGGTCTGGGGGAACCCTAACCCTGAGCTCAGTCCAGTTCA	126321	Hs.656901	GO:0055085|GO:0016021|GO:0016020	NP_778148	Chromosome 19 open reading frame 28	153.098	380.817	7.34277	8.48434
ASHG19A3A020515	-2.4645	-1.3013	2.4645	down	coding	NM_001002034	FAM109B	RefSeq_coding	2369	chr22	+	42470254	42475441		CCTTTCTCTTATTGCTACAGTGTTTTGTACACGGTTAAAACACTAGTAAAGCTTTTTCGT	150368	Hs.368312	GO:0005794|GO:0030136|GO:0031410|GO:0005769|GO:0055037	NP_001002034	Family with sequence similarity 109, member B	201.323	563.533	7.73833	9.03963
ASHG19A3A011064	-2.14862	-1.10341	2.14862	down	coding	NM_001080493	ZNF823	RefSeq_coding	2414	chr19	-	11832079	11849760		AATGAAATGGGAGGACCAGAACATTGGAGATCAGTGCCAAAATGCCAAGAGAAATCTAAG	55552	Hs.142167	GO:0003677|GO:0046872|GO:0008270|GO:0006355|GO:0005622|GO:0005634	NP_001073962	Zinc finger protein 823	96.0981	230.345	6.65903	7.76245
ASHG19A3A018612	-2.00927	-1.00667	2.00927	down	coding	NM_182484	BAGE5	RefSeq_coding	1840	chr21	-	11020841	11098925	NM_182482,NM_182481,NM_181704,NM_170606,	ATATGTGTGTAGTTTGTGGCAGTTTTGGCCAAGGAGCAGAAGGAAGACTACTTGCCTGTT	574	Hs.545789	GO:0005576	NP_001178	B melanoma antigen	65.3683	146.965	6.1098	7.11647
ASHG19A3A000653	-3.95219	-1.98265	3.95219	down	coding	NM_001001392	CD44	RefSeq_coding	3985	chr11	+	35160416	35253946		TGAGCATCGGATTTGAGACCTGCAGTTTGCATTGCAGTCAACAGTCGAAGAAGGTAAGGG	960	Hs.502328	GO:0005518|GO:0005540|GO:0005515|GO:0004888|GO:0016337|GO:0007160|GO:0019221|GO:0060333|GO:0043518|GO:0043066|GO:0070374|GO:0033138|GO:0050731|GO:0005794|GO:0009986|GO:0005737|GO:0005887|GO:0005886	NP_001189486	CD44 molecule (Indian blood group)	835.978	3694.66	9.79501	11.7777
ASHG19A3A008247	-2.70118	-1.43359	2.70118	down	coding	NM_017748	CWC25	RefSeq_coding	2347	chr17	-	36957446	36981589		AACTCTCTGCAGAGGAATTAGAGCGAAAACGGCAAGAGATGATGGAAAACGCCAAATGGA	54883	Hs.406223		NP_060218	CWC25 spliceosome-associated protein homolog (S. cerevisiae)	91.9073	276.302	6.59318	8.02677
ASHG19A3A003218	-3.9198	-1.97078	3.9198	down	coding	NM_001164385	STAU2	RefSeq_coding	3982	chr8	-	74461843	74659162		TCTGCAAAGTGTCCCCGGCAAGAAGATGTTCTCAGTGCAGCTGAGTCTTGGTGAGCAGAC	27067	Hs.561815	GO:0003725|GO:0006810|GO:0005737|GO:0005783|GO:0005622|GO:0005874|GO:0005730|GO:0005634	NP_055208	Staufen, RNA binding protein, homolog 2 (Drosophila)	72.244	317.764	6.25386	8.22465
ASHG19A3A036807	-4.00006	-2.00002	4.00006	down	coding	NM_024915	GRHL2	RefSeq_coding	5231	chr8	+	102504667	102681950		TGAACCTTTCCCTAAATCAAGATCACCTGGAGAATTCCAAGCGGGAACAGTACAGCATCA	79977	Hs.661088	GO:0003677|GO:0003700|GO:0005737|GO:0005730|GO:0005634	NP_079191	Grainyhead-like 2 (Drosophila)	215.934	974.558	7.8394	9.83942
ASHG19A3A007075	-2.76272	-1.46609	2.76272	down	coding	NM_014154	ARMC8	RefSeq_coding	3178	chr3	+	137906147	137965728	NM_213654,NM_015396,	TTCGAGCTGTCCGACTCTGAGAATGGAAGTAACAGCTAGCAGTCGCCACTATGTTGACAG	25852	Hs.266826	GO:0005488	NP_998819	Armadillo repeat containing 8	107.397	333.169	6.82565	8.29174
ASHG19A3A000805	-2.40046	-1.26331	2.40046	down	coding	NM_001005735	CHEK2	RefSeq_coding	1991	chr22	-	29083730	29137822		CTTCAGGATGGATTTGCCAATCTTGAGACAGAGTCTGGCCATGTTACCCAATCTGATCTT	11200	Hs.291363	GO:0005524|GO:0016301|GO:0046872|GO:0000166|GO:0005515|GO:0004674|GO:0016740|GO:0000077|GO:0008630|GO:0007049|GO:0000075|GO:0016310|GO:0006468|GO:0090399|GO:0006974|GO:0042770|GO:0016605|GO:0000781|GO:0005654|GO:0005634	NP_665861	CHK2 checkpoint homolog (S. pombe)	222.361	604.187	7.8797	9.14301
ASHG19A3A005095	-2.5797	-1.3672	2.5797	down	coding	NM_019012	PLEKHA5	RefSeq_coding	4334	chr12	+	19282647	19529331		GCAGCAAAGAGGTACTACAGAAATAGGTATGATAGGATCAAAGCCTTTCTCAACAGTTAA	54477	Hs.188614	GO:0005545|GO:0005515|GO:0008150|GO:0005575	NP_061885	Pleckstrin homology domain containing, family A member 5	183.582	535.56	7.60464	8.97185
CUST_25_PI426249100	-2.23714	-1.16166	2.23714	down	coding	NM_002146_Exon4-	NM_002146	HOX cluster	2311	chr17	-	46626232	46628543	nc-HOXB2-164-,NM_002146,	GGAACTTTCTTTGTTCTTCAGTAGTTACTTTTTTCCTTACCTAAAAGGGTTGTCTGTCAA						187.562	474.126	7.63316	8.79482
ASHG19A3A028503	-4.56902	-2.19188	4.56902	down	coding	NM_020190	OLFML3	RefSeq_coding	1852	chr1	+	114522029	114524875		GGAACAGGACTTTCTCCACATTGTTTTGTATTGCAACATTTTGCATTAAAAGGAAAATCC	56944	Hs.9315	GO:0007275|GO:0005576	NP_064575	Olfactomedin-like 3	70.7177	362.816	6.22247	8.41435
ASHG19A3A020287	-4.8455	-2.27665	4.8455	down	coding	NM_173510	CCDC117	RefSeq_coding	3999	chr22	+	29168661	29185282		ATTTGTGAAGAAATGGATCAGACAACTGGAGAACCACAGTGTGAAGTTGCCCGAAGGAAG	150275	Hs.406460		NP_775781	Coiled-coil domain containing 117	99.1642	539.811	6.70558	8.98222
ASHG19A3A044922	-3.50775	-1.81055	3.50775	down	coding	NM_001170690	SCUBE2	RefSeq_coding	4058	chr11	-	9041049	9113150		TTCCAAAATGAGGAAGGACAAATGACTTGTGAACCATGCCCAAGACCAGGAAATTCTGGG	57758	Hs.523468	GO:0005509|GO:0005576	NP_066025	Signal peptide, CUB domain, EGF-like 2	198.356	784.845	7.71635	9.52689
ASHG19A3A015339	-2.30707	-1.20606	2.30707	down	coding	NM_145175	FAM84A	RefSeq_coding	6366	chr2	+	14772809	14780166		GGGCTTAAGGCTAATTTGAGTTGAAGGGTATTTGTAATATTTGATTTGCTTTTAGCAGAG	151354	Hs.260855		NP_660158	Family with sequence similarity 84, member A	312.49	815.419	8.37802	9.58408
ASHG19A3A027750	-2.42658	-1.27892	2.42658	down	coding	NM_024872	DOK3	RefSeq_coding	1747	chr5	-	176930751	176936858		ATAGTGTGCAGACTCACAGATAATAAAGCTCAGAGCAGCTCCCGGCAGGGGCACTCACGG	79930	Hs.720849	GO:0005158|GO:0005737|GO:0005886	NP_079148	Docking protein 3	140.497	383.513	7.21509	8.49401
ASHG19A3A004552	-2.64512	-1.40333	2.64512	down	coding	NM_006812	OS9	RefSeq_coding	2869	chr12	+	58087737	58115338	NM_001017956,	GGAACTGGAAAACATCATCCAGGAGACAGAGAAAGAGCTGGACCCAGATGGGCTGAAGAA	10956	Hs.527861	GO:0001948|GO:0005515|GO:0005529|GO:0030433|GO:0006621|GO:0016567|GO:0042787|GO:0034976|GO:0000836|GO:0005783|GO:0005788	NP_006803	Osteosarcoma amplified 9, endoplasmic reticulum lectin	318.243	952.088	8.40316	9.80649
ASHG19A3A041605	-3.01879	-1.59397	3.01879	down	coding	NM_003413	ZIC3	RefSeq_coding	3939	chrX	+	136648345	136654257		GGGCAATGCTCTAGGTTTTTGGTGGCAGTCAATTTGGTATTATATATGATCATTTTCAAT	7547	Hs.111227	GO:0046872|GO:0005515|GO:0043565|GO:0003700|GO:0016563|GO:0008270|GO:0009952|GO:0007368|GO:0001947|GO:0007389|GO:0045944|GO:0006351|GO:0005737|GO:0005622|GO:0005634	NP_003404	Zic family member 3 (odd-paired homolog, Drosophila)	95.5464	322.039	6.65076	8.24473
ASHG19A3A048598	-2.12423	-1.08694	2.12423	down	coding	NM_000110	DPYD	RefSeq_coding	4451	chr1	-	97543301	98386615		TTTTTTGCCAAGCTGACCCCAAATGTCACTGATATTGTGAGCATCGCAAGAGCTGCAAAG	1806	Hs.335034	GO:0051539|GO:0050661|GO:0004158|GO:0017113|GO:0017113|GO:0017113|GO:0017113|GO:0009055|GO:0050660|GO:0046872|GO:0016491|GO:0042803|GO:0042803|GO:0006207|GO:0006222|GO:0055086|GO:0055114|GO:0006145|GO:0006208|GO:0006208|GO:0006206|GO:0046135|GO:0006214|GO:0006210|GO:0006212|GO:0005737|GO:0005829|GO:0005829	NP_001153773	Dihydropyrimidine dehydrogenase	136.064	324.762	7.1693	8.25623
ASHG19A3A004139	-2.09993	-1.07034	2.09993	down	coding	NM_003343	UBE2G2	RefSeq_coding	2919	chr21	-	46188955	46221738		TCAAGAGGCTGATGGCCGAGTACAAACAATTAACACTGAATCCTCCGGAAGGAATTGTAG	7327	Hs.529420	GO:0005524|GO:0016881|GO:0016874|GO:0000166|GO:0005515|GO:0004842|GO:0043687|GO:0070936|GO:0006511|GO:0005829	NP_872630	Ubiquitin-conjugating enzyme E2G 2 (UBC7 homolog, yeast)	100.623	235.954	6.72637	7.79671
ASHG19A3A010898	-2.16668	-1.11548	2.16668	down	coding	NM_001013706	PLIN5	RefSeq_coding	2445	chr19	-	4522545	4535208		ATACTCGCTTGCTTTGCTGTTTGGGATTTGCCTCCAGAATAAAGGTCCTTTTTGTTGTTG	440503	Hs.131034	GO:0005811	NP_001013728	Perilipin 5	535.246	1317.24	9.15871	10.2742
ASHG19A3A013833	-13.1834	-3.72066	13.1834	down	coding	NM_019885	CYP26B1	RefSeq_coding	4534	chr2	-	72356366	72374963		TTTTGGAAATACTCAATGTGGCTCTTCTATAGGCTTCTAGAATAAACCGTGGGGACCCGC	56603	Hs.91546	GO:0009055|GO:0020037|GO:0046872|GO:0008401|GO:0008401|GO:0001972|GO:0001709|GO:0030326|GO:0007140|GO:0048387|GO:0055114|GO:0009954|GO:0034653|GO:0007283|GO:0006805|GO:0005783|GO:0005789|GO:0016020|GO:0005792	NP_063938	Cytochrome P450, family 26, subfamily B, polypeptide 1	108.616	1608.47	6.84288	10.5635
ASHG19A3A009867	-3.2844	-1.71563	3.2844	down	coding	NM_002758	MAP2K6	RefSeq_coding	1879	chr17	+	67410837	67538462		TGGCTACTTGGTGGACTCTGTTGCTAAAACAATTGATGCAGGTTGCAAACCATACATGGC	5608	Hs.463978	GO:0005524|GO:0004708|GO:0000166|GO:0005515|GO:0004674|GO:0004713|GO:0016740|GO:0006975|GO:0002755|GO:0002755|GO:0002756|GO:0002756|GO:0008063|GO:0000187|GO:0060048|GO:0007050|GO:0045087|GO:0042692|GO:0043065|GO:0051149|GO:0042493|GO:0007165|GO:0051403|GO:0034130|GO:0034134|GO:0034138|GO:0034142|GO:0002224|GO:0005829|GO:0005829|GO:0005654	NP_002749	Mitogen-activated protein kinase kinase 6	72.8244	267.346	6.26516	7.98079
ASHG19A3A048778	-2.4173	-1.2734	2.4173	down	coding	NM_004731	SLC16A7	RefSeq_coding	3575	chr12	+	60083125	60175407		TTTTGGCCTTGGATTTGGGAGTGTTAGCAGTGTTCTCTTTGAAACTCTCATGGACCTCGT	9194	Hs.439643	GO:0008028|GO:0005477|GO:0015355|GO:0015293|GO:0006848|GO:0055085|GO:0005887|GO:0005624|GO:0005886	NP_004722	Solute carrier family 16, member 7 (monocarboxylic acid transporter 2)	126.945	347.019	7.07304	8.34643
ASHG19A3A008604	-2.38994	-1.25698	2.38994	down	coding	NM_001085430	C17orf67	RefSeq_coding	829	chr17	-	54869274	54893250		TGTTCAGAGTAGTGAAGCATACCACTTGGGGTTGCTGAGTTGTTTTGTCCTCTATTTTTT	339210	Hs.658949	GO:0005576	NP_001078899	Chromosome 17 open reading frame 67	380.019	1025.76	8.66193	9.91891
ASHG19A3A028851	-2.38434	-1.25359	2.38434	down	coding	NM_005733	KIF20A	RefSeq_coding	3471	chr5	+	137514416	137523403		ATCTCCGAGATGAAATTTGCAATGAGATGGTAGAACAGATGCAACAGCGGGAACAGTGGT	10112	Hs.718626	GO:0005524|GO:0003777|GO:0000166|GO:0005515|GO:0005215|GO:0000087|GO:0000910|GO:0007018|GO:0000278|GO:0015031|GO:0016192|GO:0005794|GO:0005737|GO:0005856|GO:0005874|GO:0005654	NP_005724	Kinesin family member 20A	1214.63	3253.54	10.3333	11.5869
ASHG19A3A047874	-2.68059	-1.42255	2.68059	down	coding	NM_003774	GALNT4	RefSeq_coding	5360	chr12	-	89913191	89918535		GTAAGTTCCTGCATATTCATTATAAGATGGCAAATCAAACTTTTCTAGGATGAAGACAGC	282809	Hs.25130	GO:0030030|GO:0042995|GO:0005814|GO:0005737|GO:0005856|GO:0005932	NP_758440	POC1 centriolar protein homolog B (Chlamydomonas)	3958.91	11763.1	12.0244	13.447
ASHG19A3A027981	-2.33823	-1.22542	2.33823	down	coding	NM_019018	FAM105A	RefSeq_coding	7064	chr5	+	14581890	14616285		TTGGCAGTTTCATTTCTGGTGGCTGCCATCTGCTACTTCCGGAGGCTACATTTATATTCA	54491	Hs.155085		NP_061891	Family with sequence similarity 105, member A	69.8531	182.716	6.20575	7.43116
ASHG19A3A052900	-2.78443	-1.47738	2.78443	down	coding	NM_002748	MAPK6	RefSeq_coding	4225	chr15	+	52311410	52358461		CCTTTTGATGCCAGTTTTCTTCCTTGTTTACACAAGTTCAATTTGAAAGGAAAAGGCAAT	5597	Hs.411847	GO:0005524|GO:0004707|GO:0000166|GO:0004674|GO:0007049|GO:0006468|GO:0007165|GO:0005737	NP_002739	Mitogen-activated protein kinase 6	97.9924	304.587	6.68688	8.16426
ASHG19A3A054419	-3.07533	-1.62074	3.07533	down	coding	NM_000418	IL4R	RefSeq_coding	3678	chr16	+	27325250	27376098		CTGAGGAGAGTGGAACAGAAGGGGTGGAGTTTTGTATAAATAAAGTTTCTTTGTCTCTTT	3566	Hs.513457	GO:0042802|GO:0043560|GO:0004913|GO:0005515|GO:0004872|GO:0005057|GO:0006955|GO:0045626|GO:0045630|GO:0002532|GO:0042127|GO:0007165|GO:0005576|GO:0005615|GO:0005887|GO:0005886	NP_001008699	Interleukin 4 receptor	1109.42	3822.1	10.2031	11.8239
ASHG19A3A005488	-2.01276	-1.00917	2.01276	down	coding	NM_032013	NDRG3	RefSeq_coding	2964	chr20	-	35280169	35374481		AGAAACTTCCAGGACTTTGACTGTCAGGAACATGATATAGAAACAACTCATGGTGTGGTC	57446	Hs.437338	GO:0003674|GO:0030154|GO:0030308|GO:0007283|GO:0005737	NP_114402	NDRG family member 3	209.417	476.977	7.79532	8.8045
ASHG19A3A037973	-2.30498	-1.20476	2.30498	down	coding	NM_018249	CDK5RAP2	RefSeq_coding	6230	chr9	-	123151147	123342437		TAGAAAGGAGCATCGAAACCAGCAGCACTCTGCAGAGCAGGCTCAAGGAACAGCTGGCAA	55755	Hs.269560	GO:0005516|GO:0008017|GO:0042808|GO:0010843|GO:0005515|GO:0015631|GO:0000086|GO:0007420|GO:0051297|GO:0007059|GO:0001578|GO:0000226|GO:0000278|GO:0045664|GO:0090231|GO:0005794|GO:0005813|GO:0005737|GO:0005856|GO:0005829|GO:0005874|GO:0000242|GO:0048471|GO:0000922	NP_060719	CDK5 regulatory subunit associated protein 2	268.042	697.179	8.15215	9.35691
ASHG19A3A021565	-2.13212	-1.09229	2.13212	down	coding	NM_020701	ISY1	RefSeq_coding	1775	chr3	-	128848234	128880029		CTGAATGATGAAATTAACAAGCTGCTAAGGGAGAAAGGACACTGGGAGGTCCGGATAAAG	57461	Hs.512661	GO:0008380|GO:0000398|GO:0071013|GO:0005730|GO:0005634	NP_065752	ISY1 splicing factor homolog (S. cerevisiae)	273.511	659.972	8.18216	9.27445
ASHG19A3A038114	-2.00651	-1.00469	2.00651	down	coding	NM_000113	TOR1A	RefSeq_coding	2117	chr9	-	132575221	132586441		ACAGTGACTATGTCCACCTGTTTGTGGCCACATTGCACTTTCCACATGCTTCAAACATCA	1861	Hs.534312	GO:0005524|GO:0019894|GO:0000166|GO:0005515|GO:0004252|GO:0051082|GO:0051085|GO:0006457|GO:0006979|GO:0006986|GO:0005737|GO:0030659|GO:0005783|GO:0005788|GO:0016020|GO:0005792|GO:0043005|GO:0031965|GO:0005634|GO:0005625	NP_000104	Torsin family 1, member A (torsin A)	1189.99	2698.14	10.3053	11.31
ASHG19A3A054610	-3.2035	-1.67965	3.2035	down	coding	NM_138736	GNAO1	RefSeq_coding	6229	chr16	+	56225250	56382110		ATTGGCTGCCATAATGTATTTATTAGTCGCCTACCGTTAATAAAAAGTGCCCGCTTTCCT	2775	Hs.644524	GO:0031683|GO:0005525|GO:0003924|GO:0003924|GO:0019001|GO:0031821|GO:0031852|GO:0000166|GO:0004871|GO:0007188|GO:0006184|GO:0006184|GO:0007568|GO:0009987|GO:0007212|GO:0030900|GO:0007626|GO:0006936|GO:0051926|GO:0031175|GO:0043547|GO:0008016|GO:0034097|GO:0042493|GO:0042542|GO:0043278|GO:0014070|GO:0010243|GO:0031234|GO:0005834|GO:0005622|GO:0005886|GO:0005886|GO:0019717	NP_620073	Guanine nucleotide binding protein (G protein), alpha activating activity polypeptide O	67.7316	243.172	6.16135	7.841
ASHG19A3A011505	-2.36208	-1.24006	2.36208	down	coding	NM_198477	CXCL17	RefSeq_coding	870	chr19	-	42932695	42947136		AAGAAAATTCATGACAGTGTCTGGGCTGCCAAAGAAGCAGTGCCCCTGTGATCATTTCAA	284340	Hs.445586	GO:0001525|GO:0030154|GO:0006935|GO:0007275|GO:0005576	NP_940879	Chemokine (C-X-C motif) ligand 17	130.464	348.049	7.11067	8.35072
ASHG19A3A050665	-2.17347	-1.12	2.17347	down	coding	NM_001039771	CBLN3	RefSeq_coding	2360	chr14	-	24895741	24898731		GGGTGTTACAGGTACAAGTAGGTATGTTGCAGAGGAAAATAAATATCAAACTGTATACTA	643866	Hs.207603	GO:0030054|GO:0005576|GO:0045202	NP_001034860	Cerebellin 3 precursor	735.699	1803.53	9.61157	10.7316
ASHG19A3A016155	-2.50919	-1.32722	2.50919	down	coding	NM_023016	ANKRD57	RefSeq_coding	4681	chr2	+	110371910	110376563		CTTGGAGTCTAGGTTGCCTTGTCTCTCCTATTTTTAAATAAGTGAAATTTGGGAGATTGT	65124	Hs.355455		NP_075392	Ankyrin repeat domain 57	1769.67	5001.17	10.8797	12.2069
ASHG19A3A012720	-2.3524	-1.23414	2.3524	down	coding	NM_002483	CEACAM6	RefSeq_coding	2631	chr19	+	42259397	42276113		TTTTCAGAGTTGGACTTCTAGACTCACCTGTTCTCACTCCCTGTTTTAATTCAACCCAGC	4680	Hs.466814	GO:0007267|GO:0007165|GO:0031225|GO:0005887|GO:0005886	NP_002474	Carcinoembryonic antigen-related cell adhesion molecule 6 (non-specific cross reacting antigen)	898.922	2385.37	9.89599	11.1301
ASHG19A3A026718	-3.54433	-1.82551	3.54433	down	coding	NM_003672	CDC14A	RefSeq_coding	4287	chr1	+	100818022	100985832		CACATGTGCCTACATAGACACACCAAGAAGTGGATGTATATAATATAGAAAGTATATAGC	8556	Hs.127411	GO:0016787|GO:0004721|GO:0005515|GO:0004725|GO:0008138|GO:0007049|GO:0051301|GO:0008283|GO:0006470|GO:0005737|GO:0005856|GO:0005815|GO:0005730|GO:0005634|GO:0005819	NP_201570	CDC14 cell division cycle 14 homolog A (S. cerevisiae)	1711.52	6826.12	10.8301	12.6556
ASHG19A3A004639	-2.39129	-1.25779	2.39129	down	coding	NM_012229	NT5C2	RefSeq_coding	5361	chr10	-	104845939	104953056		tcggcctcccaaagttctgggattacaagtAATACAAAATACAGTTAAAATAAAATGTCA	22978	Hs.97439	GO:0008253|GO:0016787|GO:0046872|GO:0000166|GO:0005515|GO:0055086|GO:0009117|GO:0006144|GO:0006195|GO:0005737|GO:0005829	NP_036361	5'-nucleotidase, cytosolic II	83.9546	224.014	6.46566	7.72344
ASHG19A3A049149	-2.06442	-1.04574	2.06442	down	coding	NM_014708	KNTC1	RefSeq_coding	6965	chr12	+	123011808	123110946		TTTGCAGCAGTCCTAAAGAAGGAATGATTAAGGGTCTGTGGAAAAACCACAGCCACGAGT	9735	Hs.300559	GO:0005515|GO:0000087|GO:0051301|GO:0000278|GO:0007093|GO:0000236|GO:0006461|GO:0007096|GO:0000777|GO:0005737|GO:0005856|GO:0005829|GO:0005828|GO:0005634|GO:0000922	NP_055523	Kinetochore associated 1	1896.13	4397.03	10.9826	12.0283
ASHG19A3A048845	-2.36603	-1.24247	2.36603	down	coding	NM_014505	KCNMB4	RefSeq_coding	1631	chr12	+	70760061	70824977		TGCTGAAGTCTGAACCTTACTGTGTAACCCTCAGTTTCCACTATTAAAGAGTATCTTTTG	27345	Hs.525529	GO:0015269|GO:0005216|GO:0005515|GO:0007596|GO:0005513|GO:0006811|GO:0030168|GO:0006813|GO:0001508|GO:0019228|GO:0046928|GO:0019229|GO:0007268|GO:0005887|GO:0016020|GO:0008076	NP_055320	Potassium large conductance calcium-activated channel, subfamily M, beta member 4	682.998	1825.81	9.50421	10.7467
ASHG19A3A032998	-2.48799	-1.31498	2.48799	down	coding	NM_012453	TBL2	RefSeq_coding	3041	chr7	-	72983278	72993013		ACATATCTTGCATGGACTTTAGCAGCAATGGCAAATACCTGGCTACCTGTGCAGATGATC	26608	Hs.647044	GO:0003674|GO:0008150|GO:0005575	NP_036585	Transducin (beta)-like 2	67.4533	188.073	6.15476	7.46974
ASHG19A3A011865	-2.40002	-1.26305	2.40002	down	coding	NM_178837	C19orf51	RefSeq_coding	2210	chr19	-	55670030	55678018		ATTGTTCTCTCAGAATTCCAAATTCCACTTCTGAGGCTCTAAGCCCAGCCTAGGATCTGA	352909	Hs.351582		NP_849159	Chromosome 19 open reading frame 51	571.625	1553.2	9.25155	10.5146
ASHG19A3A045252	-2.76733	-1.46849	2.76733	down	coding	NM_004200	SYT7	RefSeq_coding	4609	chr11	-	61282787	61348298		GGGAATGGGCCCTGCTTTTTGTGGCAAGGCCTGTTCTGATTAATAAAGGATCGTGAAAAA	9066	Hs.502730	GO:0005509|GO:0005215|GO:0017158|GO:0050796|GO:0030054|GO:0031410|GO:0016021|GO:0016020|GO:0005624|GO:0045202|GO:0030672	NP_004191	Synaptotagmin VII	5588.25	17187.1	12.5324	14.0009
ASHG19A3A006519	-2.18712	-1.12903	2.18712	down	coding	NM_181054	HIF1A	RefSeq_coding	3955	chr14	+	62162118	62214977		ATGGTTCACTTTTTCAAGCAGTAGGAATTATTTAGCATGTAGACTGCTGGGGCAATCAAT	3091	Hs.597216	GO:0051879|GO:0035035|GO:0005515|GO:0046982|GO:0046982|GO:0043565|GO:0003700|GO:0003700|GO:0003705|GO:0003705|GO:0004871|GO:0008134|GO:0030528|GO:0032963|GO:0002248|GO:0051541|GO:0001837|GO:0042789|GO:0032364|GO:0045766|GO:0032722|GO:0001938|GO:0010634|GO:0045648|GO:0043193|GO:0045821|GO:0046886|GO:0051000|GO:0045944|GO:0030949|GO:0010575|GO:0010468|GO:0043619|GO:0006355|GO:0032909|GO:0001666|GO:…	NP_851397	Hypoxia inducible factor 1, alpha subunit (basic helix-loop-helix transcription factor)	1156.17	2871.09	10.2651	11.3941
ASHG19A3A045057	-2.33846	-1.22556	2.33846	down	coding	NM_001326	CSTF3	RefSeq_coding	2846	chr11	-	33106134	33183037		ATTTGGTATGAAGCTGCCCAGTATCTTGAGCAGTCAAGTAAACTGCTCGCAGAAAAGGGA	1479	Hs.44402	GO:0003723|GO:0005515|GO:0008380|GO:0010467|GO:0031124|GO:0006379|GO:0006378|GO:0006397|GO:0000398|GO:0006369|GO:0006366|GO:0005622|GO:0005654|GO:0005634	NP_001317	Cleavage stimulation factor, 3' pre-RNA, subunit 3, 77kDa	198.172	524.234	7.71463	8.94019
ASHG19A3A052347	-4.63264	-2.21184	4.63264	down	coding	NM_182470	PKM2	RefSeq_coding	2674	chr15	-	72491369	72523684		ATGCAGTGGAGCTCAGAGAGAGGAGAACGGCTCCTCACGCCTGGGGCCTGCTCTTCAGAA	5315	Hs.534770	GO:0005524|GO:0000287|GO:0000166|GO:0030955|GO:0005515|GO:0004743|GO:0016740|GO:0005975|GO:0006006|GO:0006096|GO:0006096|GO:0012501|GO:0005737|GO:0005829|GO:0005829|GO:0005634|GO:0005886	NP_872271	Pyruvate kinase, muscle	78.6157	410.664	6.37528	8.58712
ASHG19A3A040482	-6.57876	-2.71781	6.57876	down	coding	NM_022661	SPANXC	RefSeq_coding	425	chrX	-	140335596	140336646	NM_145665,NM_145662,NM_032417,NM_013453,	AAAGTAGCAAGAAGCTACATCTCTCAACCTTGGGCAATGAAAATAAAGTTTGAGAAGCTG	64663	Hs.558533	GO:0003674|GO:0008150|GO:0005737|GO:0005634	NP_073152	SPANX family, member C	74.1455	550.342	6.29059	9.00841
ASHG19A3A013266	-2.27908	-1.18845	2.27908	down	coding	NM_020738	KIDINS220	RefSeq_coding	7361	chr2	-	8868986	8977755		ATGCTGACAGAAGAGTTTCACAGAACAGCCTTGGGGAGATGACAAAACTTGGTAGCAAGA	57498	Hs.9873	GO:0000186|GO:0048011|GO:0005829|GO:0016021|GO:0016020	NP_065789	Kinase D-interacting substrate, 220kDa	229.343	590.953	7.92358	9.11204
ASHG19A3A041030	-2.49708	-1.32024	2.49708	down	coding	NM_018969	GPR173	RefSeq_coding	4265	chrX	+	53078505	53109794		CGTACGTCCTTCCAATCCACCGTTCATGTGTTTATTTACATATATGTGTATCTGTGAAAA	54328	Hs.193011	GO:0004930|GO:0004872|GO:0007186|GO:0007165|GO:0016021|GO:0005886	NP_061842	G protein-coupled receptor 173	144.652	407.811	7.25846	8.5787
ASHG19A3A033249	-2.74336	-1.45595	2.74336	down	coding	NM_152742	GPC2	RefSeq_coding	2666	chr7	-	99767229	99774990		CCTTCACAAACTCCATGTTTCAGTGTTTGAGTCCATGTTTATTCTGCAAATAAATGGTAA	221914	Hs.211701	GO:0043395|GO:0030182|GO:0031225|GO:0005783|GO:0005576|GO:0005615|GO:0005886|GO:0005578	NP_689955	Glypican 2	377.352	1169.53	8.65309	10.109
ASHG19A3A008952	-2.79503	-1.48286	2.79503	down	coding	NM_002615	SERPINF1	RefSeq_coding	1542	chr17	+	1665258	1680867		AATTTGACCTTGATAGAGGAGAGCCTCACCTCCGAGTTCATTCATGACATAGACCGAGAA	5176	Hs.532768	GO:0004867|GO:0007568|GO:0008283|GO:0001822|GO:0007275|GO:0016525|GO:0010951|GO:0060770|GO:0050728|GO:0050769|GO:0030162|GO:0051384|GO:0032526|GO:0007614|GO:0031012|GO:0005576|GO:0005615|GO:0042470	NP_002606	Serpin peptidase inhibitor, clade F (alpha-2 antiplasmin, pigment epithelium derived factor), member 1	194.827	616.626	7.68753	9.17039
ASHG19A3A044418	-2.04256	-1.03038	2.04256	down	coding	NM_004193	GBF1	RefSeq_coding	6376	chr10	+	104005308	104142649		TTACATCATTCAAGGGGAGATTAACATTGTGGTTGGGGCCATCAAACGAAATGCCCGATG	8729	Hs.290243	GO:0005086|GO:0005086|GO:0005515|GO:0048205|GO:0016044|GO:0006892|GO:0032012|GO:0006890|GO:0000139|GO:0000139|GO:0005622	NP_004184	Golgi brefeldin A resistant guanine nucleotide exchange factor 1	136.234	312.812	7.17154	8.20192
ASHG19A3A005732	-2.2138	-1.14652	2.2138	down	coding	NM_080632	UPF3B	RefSeq_coding	2381	chrX	-	118967988	118986968		TCTGTTACAAGCTGTGAATCAGAAAAATCTGCTCAAGAAGCCAGAAAAAGGAGATGAAAA	65109	Hs.103832	GO:0003723|GO:0005487|GO:0000166|GO:0005515|GO:0008380|GO:0010467|GO:0031124|GO:0006406|GO:0000398|GO:0000184|GO:0000184|GO:0006913|GO:0006369|GO:0006366|GO:0006810|GO:0005737|GO:0005737|GO:0005829|GO:0005654|GO:0005634	NP_542199	UPF3 regulator of nonsense transcripts homolog B (yeast)	116.615	289.27	6.94616	8.09268
ASHG19A3A051002	-7.28093	-2.86412	7.28093	down	coding	NM_174976	ZDHHC22	RefSeq_coding	3408	chr14	-	77597613	77608134		GTAGCATTTGTACACATGGCCCTGTATTGTCCTTGAAGAACATCAATAAAATATATGGTT	283576	Hs.525485	GO:0008415|GO:0046872|GO:0016740|GO:0008270|GO:0016021|GO:0016020	NP_777636	Zinc finger, DHHC-type containing 22	210.915	1724.44	7.80596	10.6701
ASHG19A3A045003	-2.32358	-1.21635	2.32358	down	coding	NM_147199	MRGPRX1	RefSeq_coding	1190	chr11	-	18955360	18956549	NM_054031,	TGTTCATCTAGTTTCTATTTTCCTGTCCGCTCTTAACAGCAGTGCCAACCCCATCATTTA	259249	Hs.711459	GO:0004930|GO:0004872|GO:0006953|GO:0016021|GO:0005886	NP_671732	MAS-related GPR, member X1	102.825	266.423	6.76007	7.97643
ASHG19A3A047206	-3.39412	-1.76304	3.39412	down	coding	NM_001144959	EFCAB4B	RefSeq_coding	2246	chr12	-	3749554	3862366		ACAATTTGGGAGCCAAATCTCTGCAATAGTGGTTGGCCTGTTGGTTCCTCAGAATGGAAT	84766	Hs.504534	GO:0005509|GO:0005515|GO:0032237|GO:0006811|GO:0051928|GO:0002115|GO:0005737	NP_116069	EF-hand calcium binding domain 4B	475.806	1832.65	8.99008	10.7531
ASHG19A3A030878	-2.16331	-1.11324	2.16331	down	coding	NM_001453	FOXC1	RefSeq_coding	3452	chr6	+	1610680	1614127		CTTAAGCAGTAATTGCTGTTGCTTGTTGTCAAAATTTGATCATTGTTAAAGGATTGCTGC	2296	Hs.348883	GO:0008301|GO:0003677|GO:0031490|GO:0003690|GO:0010843|GO:0005515|GO:0043565|GO:0003700|GO:0003705|GO:0003704|GO:0016566|GO:0016563|GO:0016563|GO:0008134|GO:0007219|GO:0006916|GO:0048844|GO:0001568|GO:0001974|GO:0007420|GO:0043010|GO:0060038|GO:0030199|GO:0035050|GO:0001654|GO:0008354|GO:0030203|GO:0007507|GO:0003007|GO:0001701|GO:0032808|GO:0001946|GO:0048762|GO:0001656|GO:0010553|GO:0045930|GO:…	NP_001444	Forkhead box C1	2187.21	5330.81	11.1872	12.3005
ASHG19A3A000935	-2.54149	-1.34568	2.54149	down	coding	NM_001011649	CDK5RAP2	RefSeq_coding	5993	chr9	-	123151147	123342437		GATGAAGAGCACAGGAGACTGAGAGATGGTGACAAATATCCCATGGAAAGTGATAATTCA	55755	Hs.269560	GO:0005516|GO:0008017|GO:0042808|GO:0010843|GO:0005515|GO:0015631|GO:0000086|GO:0007420|GO:0051297|GO:0007059|GO:0001578|GO:0000226|GO:0000278|GO:0045664|GO:0090231|GO:0005794|GO:0005813|GO:0005737|GO:0005856|GO:0005829|GO:0005874|GO:0000242|GO:0048471|GO:0000922	NP_060719	CDK5 regulatory subunit associated protein 2	139.248	398.967	7.20358	8.54926
ASHG19A3A041338	-2.34825	-1.23159	2.34825	down	coding	NM_014380	NGFRAP1	RefSeq_coding	891	chrX	+	102632108	102632999		TAAAAAATCCTTTGATATCAGGGCTCTGAATCCTGCTGGTCAGAGCACCAAGCATTCAGT	27018	Hs.448588	GO:0043028|GO:0046872|GO:0005515|GO:0006915|GO:0008624|GO:0007275|GO:0048011|GO:0043281|GO:0005737|GO:0005829|GO:0005634	NP_996800	Nerve growth factor receptor (TNFRSF16) associated protein 1	91.573	239.675	6.58766	7.81925
ASHG19A3A048565	-2.64707	-1.4044	2.64707	down	coding	NM_024902	DNAJC22	RefSeq_coding	1854	chr12	+	49741040	49745683		TTGTCCCAAATCTAGCTTTGCCCACGAATGGCATCCCAACAGAGTTAAAGAAACTGCTTG	79962	Hs.659300	GO:0031072|GO:0051082|GO:0006457|GO:0016021|GO:0016020	NP_079178	DnaJ (Hsp40) homolog, subfamily C, member 22	377.914	1131.82	8.65459	10.059
ASHG19A3A049751	-2.90148	-1.53679	2.90148	down	coding	NM_020121	UGGT2	RefSeq_coding	4947	chr13	-	96453837	96705736		TGTCCTCTGTGCCTAAGCGTGCATCTCGATATGATGTCACATTTCTTAGGGAGAATCACA	55757	Hs.193226	GO:0003980|GO:0003980|GO:0016757|GO:0044267|GO:0043687|GO:0018279|GO:0006457|GO:0006486|GO:0005793|GO:0005783|GO:0005788|GO:0005788	NP_064506	UDP-glucose glycoprotein glucosyltransferase 2	115.828	377.575	6.93533	8.47212
ASHG19A3A029327	-2.03127	-1.02238	2.03127	down	coding	NM_004568	SERPINB6	RefSeq_coding	1665	chr6	-	2948393	2972090	BC004948,	ATGTTGGCAAGGAACTGAATATGATCATCATGCTTCCGGACGAGACCACTGACTTGAGAA	5269	Hs.519523	GO:0030414|GO:0002020|GO:0004867|GO:0004867|GO:0010951|GO:0010951|GO:0030162|GO:0005813|GO:0005737|GO:0005829|GO:0043234	NP_004559	Serpin peptidase inhibitor, clade B (ovalbumin), member 6	4638.95	10436.9	12.2573	13.2796
ASHG19A3A044478	-3.18335	-1.67055	3.18335	down	coding	NM_016824	ADD3	RefSeq_coding	4454	chr10	+	111767710	111895320		CTGTTTCACAAATTCAGTCTCAAACTCAGTCACCGCAAAATGTCCCTGAAAAATTAGAAG	120	Hs.501012	GO:0003779|GO:0005516|GO:0046872|GO:0005080|GO:0005200|GO:0042493|GO:0005938|GO:0005911|GO:0000794|GO:0005737|GO:0005856|GO:0016020|GO:0005886|GO:0005625	NP_063968	Adducin 3 (gamma)	170.735	616.568	7.4997	9.17024
ASHG19A3A004017	-2.06936	-1.04919	2.06936	down	coding	NM_002376	MARK3	RefSeq_coding	3474	chr14	+	103851700	103970164	NM_001128920,	TAGTAAATTAACTTCAAAACTCACAAGGAGTCGCAATGTATCTGCTGAGCAAAAAGATGA	4140	Hs.35828	GO:0005524|GO:0000166|GO:0005515|GO:0004674|GO:0016740|GO:0006468	NP_002367	MAP/microtubule affinity-regulating kinase 3	3888.82	8907.25	11.9986	13.0478
ASHG19A3A046142	-2.94292	-1.55725	2.94292	down	coding	NM_001025390	AMPD3	RefSeq_coding	4473	chr11	+	10477480	10529126		ACTCATATTTCATATTCACGAGAGAATTTCCAGCCCAGGCTTTTCCTGCTCTGGCTCACT	272	Hs.501890	GO:0003876|GO:0016787|GO:0046872|GO:0006196|GO:0055086|GO:0009117|GO:0006144|GO:0009168|GO:0043101|GO:0005829	NP_001165902	Adenosine monophosphate deaminase 3	73.2621	241.475	6.27279	7.83004
ASHG19A3A017159	-5.25012	-2.39235	5.25012	down	coding	NM_024101	MLPH	RefSeq_coding	3771	chr2	+	238395877	238463960		TTTGAGCTGAATAAGCATATTTCAGCTGTGGAATGCCTGCTGACCTACCTGGAGAACACA	79083	Hs.102406	GO:0017137|GO:0003779|GO:0046872|GO:0051010|GO:0031489|GO:0008270|GO:0030318|GO:0032400|GO:0043473|GO:0006605|GO:0015629|GO:0005737	NP_077006	Melanophilin	258.495	1526.68	8.09729	10.4896
ASHG19A3A049740	-3.10135	-1.6329	3.10135	down	coding	NM_005845	ABCC4	RefSeq_coding	5843	chr13	-	95672083	95953687		CAAAATAAAGAGAGCCTATTTTACAAGATGGTGCAACAACTGGGCAAGGCAGAAGCCGCT	10257	Hs.508423	GO:0016404|GO:0005524|GO:0016887|GO:0015662|GO:0042626|GO:0005254|GO:0000166|GO:0008150|GO:0007596|GO:0006811|GO:0030168|GO:0002576|GO:0055085|GO:0016021|GO:0005624|GO:0005886|GO:0031088|GO:0031088	NP_005836	ATP-binding cassette, sub-family C (CFTR/MRP), member 4	79.3517	275.109	6.38796	8.02086
ASHG19A3A024272	-36.9036	-5.20569	36.9036	down	coding	NM_001076	UGT2B15	RefSeq_coding	2144	chr4	-	69512315	69536374	NM_001077,	CAAGAAGCCAAATACTTTAGGTTCCAATACTCGACTGTACAAGTGGTTACCCCAGAATGA	7366	Hs.150207	GO:0015020|GO:0001972|GO:0008152|GO:0008202|GO:0006805|GO:0005783|GO:0005789|GO:0016021|GO:0016020|GO:0005792	NP_001067	UDP glucuronosyltransferase 2 family, polypeptide B15	178.686	7393.77	7.56724	12.7729
ASHG19A3A011127	-2.24538	-1.16696	2.24538	down	coding	NM_001145028	PALM3	RefSeq_coding	2260	chr19	-	14164178	14169971		CCCTGGCCTCCTTCTGCGATGAAGCCTTTATACTTGAAAATAAAATGTGAAAGCACTCAA	342979	Hs.444298	GO:0005524|GO:0000166|GO:0005737|GO:0005886	NP_001138500	Paralemmin 3	1895.7	4784.05	10.9823	12.1492
ASHG19A3A028860	-3.30939	-1.72657	3.30939	down	coding	NM_001903	CTNNA1	RefSeq_coding	3778	chr5	+	138089106	138270722		CGGTTGCTGATTTTGGCTGACATGGCAGATGTCTACAAATTACTTGTTCAGCTGAAAGTT	1495	Hs.445981	GO:0051015|GO:0008013|GO:0045296|GO:0045295|GO:0005515|GO:0005198|GO:0017166|GO:0034332|GO:0007568|GO:0043297|GO:0031103|GO:0007155|GO:0034329|GO:0045216|GO:0071681|GO:0007163|GO:0016264|GO:0008584|GO:0042692|GO:0043066|GO:0007406|GO:0042475|GO:0001541|GO:0051149|GO:0045880|GO:0051291|GO:0042127|GO:0043627|GO:0014070|GO:0001669|GO:0015629|GO:0016342|GO:0005911|GO:0005737|GO:0005829|GO:0030027|GO:…	NP_001894	Catenin (cadherin-associated protein), alpha 1, 102kDa	81.3042	300.929	6.42149	8.14806
ASHG19A3A016944	-2.10737	-1.07544	2.10737	down	coding	NM_021141	XRCC5	RefSeq_coding	3448	chr2	+	216974019	217071014		AGAGTCTGAGAAAACTGTGCGTCTTCAAGAAAATTGAGAGGCATTCCATTCACTGGCCCT	7520	Hs.388739	GO:0051575|GO:0005524|GO:0004003|GO:0003677|GO:0003690|GO:0003691|GO:0004386|GO:0016817|GO:0000166|GO:0010843|GO:0008022|GO:0005515|GO:0042162|GO:0006310|GO:0006281|GO:0008283|GO:0006302|GO:0006303|GO:0006303|GO:0060218|GO:0019059|GO:0043066|GO:0050769|GO:0019047|GO:0000723|GO:0016032|GO:0043564|GO:0005694|GO:0005737|GO:0070419|GO:0000784|GO:0000783|GO:0005730|GO:0005654|GO:0005654|GO:0005634	NP_066964	X-ray repair complementing defective repair in Chinese hamster cells 5 (double-strand-break rejoining)	2433.3	5752.4	11.3347	12.4101
ASHG19A3A000863	-2.93042	-1.5511	2.93042	down	coding	NM_007158	CSDE1	RefSeq_coding	4041	chr1	-	115259537	115300624	NM_001007553,	AGTGCAATATTTGAGTATCACTGCGAGATGAGCTTTGATCCAAACCTTCTCCACAACAAT	7812	Hs.69855	GO:0003677|GO:0003723|GO:0005515|GO:0008584|GO:0006355|GO:0005737	NP_009089	Cold shock domain containing E1, RNA-binding	3558.15	11576.7	11.875	13.4261
ASHG19A3A009935	-2.14284	-1.09953	2.14284	down	coding	NM_001015002	LLGL2	RefSeq_coding	1440	chr17	+	73521782	73560804		TTCGGGAGTGGGTGCCCAGGGTTAGGTGTGGGAGGCATGGGGCAGGACCATCAGTAAAGA	3993	Hs.514477	GO:0030165|GO:0005515|GO:0007049|GO:0051301|GO:0006887|GO:0032878|GO:0005737|GO:0043231	NP_004515	Lethal giant larvae homolog 2 (Drosophila)	3387.55	8047.48	11.8019	12.9015
ASHG19A3A006882	-2.26716	-1.18088	2.26716	down	coding	NM_199414	PRC1	RefSeq_coding	3011	chr15	-	91509273	91537804		CCTGGAGCTCAACGGCAGCATCCTGAGTGCGAGAACTTTCAAAGGCTTCCAAATCTGATG	9055	Hs.366401	GO:0005515|GO:0007049|GO:0000910|GO:0000022|GO:0005737|GO:0005856|GO:0005634|GO:0005876|GO:0000922	NP_955446	Protein regulator of cytokinesis 1	2182.16	5567.5	11.1823	12.3632
ASHG19A3A048123	-2.34051	-1.22682	2.34051	down	coding	NM_198261	RSRC2	RefSeq_coding	2352	chr12	-	122989274	123011546		GACTGAACTGAAGACGCTGCAGACTCAGATAGCAAAATAATAAGCCTACTTCATGATAAG						123.265	324.822	7.03	8.25682
ASHG19A3A017933	-2.28009	-1.18909	2.28009	down	coding	NM_017859	UCKL1	RefSeq_coding	1833	chr20	-	62571190	62587768		AAACACTGTATGGTGCAAACGTCATCATCTTTGAGGGCATCATGGCCTTTGCTGACAAGA	54963	Hs.504998	GO:0005524|GO:0016301|GO:0000166|GO:0016773|GO:0005515|GO:0016740|GO:0004849|GO:0044419|GO:0008152|GO:0005737|GO:0005783|GO:0005634	NP_060329	Uridine-cytidine kinase 1-like 1	225.226	580.644	7.89668	9.08577
ASHG19A3A009582	-7.47628	-2.90232	7.47628	down	coding	NM_025104	DBF4B	RefSeq_coding	2553	chr17	+	42785975	42810245		AGTTTCATGCTCAGTGAGGATGATGGTCACCGTGTTTGTTGTGTACTTACTGTGCTGAGA	80174	Hs.728986	GO:0046872|GO:0003676|GO:0008270|GO:0007049|GO:0005634	NP_663696	DBF4 homolog B (S. cerevisiae)	69.302	585.348	6.19455	9.09687
ASHG19A3A017057	-2.14565	-1.10141	2.14565	down	coding	NM_001135187	AGFG1	RefSeq_coding	8750	chr2	+	228336887	228425938		ACAGTCTAGTGGTTCGAGTAATTTTGGAGGTTTCCCCACAGCAAGTCACTCTCCTTTTCA	3267	Hs.352962	GO:0008060|GO:0003677|GO:0003723|GO:0046872|GO:0005515|GO:0008270|GO:0030154|GO:0006406|GO:0007275|GO:0032312|GO:0007283|GO:0006810|GO:0005794|GO:0016023|GO:0043231|GO:0005643|GO:0005634	NP_004495	ArfGAP with FG repeats 1	708.057	1706.58	9.55446	10.6559
ASHG19A3A053215	-2.01258	-1.00905	2.01258	down	coding	NM_001113378	FANCI	RefSeq_coding	4749	chr15	+	89787193	89860362		ATGTGAGTGGCCCTGATGGCCAAAACCCAGAAAAGATCTTTCAGAACCTCTGTGACATAA	55215	Hs.513126	GO:0005515|GO:0006281|GO:0007049|GO:0005654|GO:0005654|GO:0005634	NP_060663	Fanconi anemia, complementation group I	907.114	2060.03	9.90839	10.9174
ASHG19A3A012762	-2.00149	-1.00107	2.00149	down	coding	NM_006300	ZNF230	RefSeq_coding	4132	chr19	+	44507076	44518072		GCAAACTTATTAACGTTAATCACTTACCTACCAGGACTCAGAATCTCAGAATAAAATTGC	7773	Hs.193583	GO:0003677|GO:0046872|GO:0008270|GO:0006355|GO:0005622|GO:0005634	NP_006291	Zinc finger protein 230	117.164	262.462	6.95197	7.95304
ASHG19A3A010253	-2.77554	-1.47277	2.77554	down	coding	NM_012319	SLC39A6	RefSeq_coding	3637	chr18	-	33688494	33709357		TCTGTGAGTGAGCCCCGAAAAGGCTTTATGTATTCCAGAAACACAAATGAAAATCCTCAG	25800	Hs.729034	GO:0046873|GO:0005385|GO:0006811|GO:0055085|GO:0071577|GO:0071577|GO:0005783|GO:0016021|GO:0031258|GO:0005886|GO:0005886	NP_036451	Solute carrier family 39 (zinc transporter), member 6	2893.24	8927.39	11.5784	13.0511
ASHG19A3A048142	-2.13292	-1.09283	2.13292	down	coding	NM_001414	EIF2B1	RefSeq_coding	1886	chr12	-	124105570	124118323		TGAATACTTTAAGTCTCAGATGAAAGAAGATCCTGACATGGCCTCAGCAGTGGCTGCCAT	1967	Hs.728874	GO:0005525|GO:0030234|GO:0005085|GO:0005515|GO:0003743|GO:0044237|GO:0044267|GO:0051716|GO:0010467|GO:0032057|GO:0014003|GO:0006446|GO:0009749|GO:0009408|GO:0009408|GO:0043434|GO:0006412|GO:0006413|GO:0005737|GO:0005829|GO:0005850|GO:0005851|GO:0005624|GO:0005886|GO:0005625	NP_001405	Eukaryotic translation initiation factor 2B, subunit 1 alpha, 26kDa	344.384	831.698	8.51843	9.61126
ASHG19A3A030415	-2.69623	-1.43094	2.69623	down	coding	NM_153612	HS3ST5	RefSeq_coding	2744	chr6	-	114376750	114384041		GTCTAGTGATTTGATGGTGAACTTTTCTAAATAAATAGCCCTTTCCCCTCCGGTGTCGGT	222537	Hs.645477	GO:0050656|GO:0008467|GO:0005515|GO:0008146|GO:0016740|GO:0015015|GO:0050819|GO:0006477|GO:0046596|GO:0005794|GO:0000139|GO:0016021|GO:0016020	NP_705840	Heparan sulfate (glucosamine) 3-O-sulfotransferase 5	1433.82	4320.64	10.5728	12.0038
ASHG19A3A028896	-2.62832	-1.39414	2.62832	down	coding	NM_012208	HARS2	RefSeq_coding	2508	chr5	+	140071017	140078889		ATTCTTGATTTGGTTATCAGCTGCTTTAAACGTCATGGAGCAAAGGGGATGGACACCCCA	23438	Hs.432560	GO:0005524|GO:0004821|GO:0004821|GO:0016874|GO:0000166|GO:0010467|GO:0006427|GO:0006418|GO:0006412|GO:0005737|GO:0005759|GO:0005739	NP_036340	Histidyl-tRNA synthetase 2, mitochondrial (putative)	84.1864	247.114	6.47011	7.86426
ASHG19A3A051775	-2.09668	-1.0681	2.09668	down	coding	NM_016022	APH1A	RefSeq_coding	2213	chr1	-	150237798	150241532		ACTACCTCCAGGGTTTTGCTTTGTCCTTTTGTGACCGTTAGTCTCTAAGCTTTACCAGGA	51107	Hs.108408	GO:0005515|GO:0007220|GO:0007220|GO:0007219|GO:0042987|GO:0042987|GO:0006915|GO:0008624|GO:0006509|GO:0031293|GO:0031293|GO:0048011|GO:0043085|GO:0016485|GO:0005794|GO:0032580|GO:0005783|GO:0005789|GO:0005887|GO:0005886|GO:0005886	NP_057106	Anterior pharynx defective 1 homolog A (C. elegans)	796.962	1884.17	9.72615	10.7943
ASHG19A3A048715	-2.7238	-1.44562	2.7238	down	coding	NM_001005915	ERBB3	RefSeq_coding	1050	chr12	+	56473891	56479400		GCTGGAGTCAGAGCTGGATCTGTTAACCGTTTTTCTAATTTCAAAGTACAGTGTACCGGA	2065	Hs.118681	GO:0005524|GO:0019838|GO:0019838|GO:0000166|GO:0005515|GO:0046982|GO:0046982|GO:0042803|GO:0030296|GO:0004713|GO:0004716|GO:0016740|GO:0004888|GO:0004714|GO:0014037|GO:0007409|GO:0032869|GO:0007623|GO:0021545|GO:0007507|GO:0060056|GO:0007162|GO:0043524|GO:0051048|GO:0009968|GO:0051402|GO:0042476|GO:0007422|GO:0014065|GO:0046326|GO:0014068|GO:0061098|GO:0006468|GO:0042127|GO:0042493|GO:0007165|GO:…	NP_001973	V-erb-b2 erythroblastic leukemia viral oncogene homolog 3 (avian)	544.596	1678.7	9.1854	10.631
ASHG19A3A001463	-2.45604	-1.29634	2.45604	down	coding	NM_001044393	MUC1	RefSeq_coding	973	chr1	-	155158301	155162700		TTCTGGGCCTCTCCAATATTAAGTTCAGTCTGGGGCTGGGGTGCCAGGCTGGGGCATCGC	4582	Hs.89603	GO:0005515|GO:0016324|GO:0005737|GO:0005576|GO:0005887|GO:0005634|GO:0005886	NP_002447	Mucin 1, cell surface associated	367.166	1021.69	8.61751	9.91385
ASHG19A3A014813	-2.2046	-1.14052	2.2046	down	coding	NM_012433	SF3B1	RefSeq_coding	4314	chr2	-	198256699	198299771		AACAGCTAGCAGAAAAAGCTAAAGCTGGAGAACTAAAAGTCGTCAATGGAGCAGCAGCGT	23451	Hs.632554	GO:0003682|GO:0005515|GO:0008380|GO:0000375|GO:0009952|GO:0010467|GO:0000398|GO:0000398|GO:0000398|GO:0005689|GO:0071013|GO:0016607|GO:0005654|GO:0005634|GO:0005681	NP_036565	Splicing factor 3b, subunit 1, 155kDa	78.7631	194.287	6.37758	7.5181
ASHG19A3A019648	-4.36512	-2.12602	4.36512	down	coding	NM_005080	XBP1	RefSeq_coding	1820	chr22	-	29190548	29196560	NM_001079539,	AAACTGAAAAACAGAGTAGCAGCTCAGACTGCCAGAGATCGAAAGAAGGCTCGAATGAGT	7494	Hs.437638	GO:0003677|GO:0046983|GO:0043565|GO:0003700|GO:0006955|GO:0006355|GO:0006351|GO:0005634	NP_005071	X-box binding protein 1	5538.49	26915.7	12.5218	14.6478
