# Supplementary material for: The Role of PinX1 in Growth Control of Breast Cancer Cells and Its Potential Molecular Mechanism by mRNA and lncRNA Expression Profiles Screening
Source: Biomed Res Int. 2014 Feb 3;2014:978984. doi: 10.1155/2014/978984 (PMC3929369; doi:10.1155/2014/978984)
Supplement: Supplementary file 1 — Human LncRNA Array V2.0 was applied for screening the alterations of lncRNA and mRNA expression profile between PinX1 overexpressed and control MCF-7 cells. After the quantile normalization and data filtering steps, the mRNA expression profile data qualified for fold-change comparison was listed in Tables S1, and lncRNA expression profile data was listed in Table S2. The differentially expressed mRNAs was listed in Tables S3 and differentially expressed lncRNAs was listed in Tables S4. GO analysis of the differentially expressed mRNAs by biological processes, cellular components and molecular functions was showed in Table S5. Profiling data of enhancer-like lncRNAs was listed in Table S6. The enhancer-like lncRNAs and their adjacent coding gene pairs was listed in Table S7. Profiling data of the Rinn lincRNAs was listed in Table S8. The Rinn lincRNAs and their adjacent coding gene pairs was listed in Table S9. Profiling data of the Hox clusters was listed in Table S10. [file 978984.f1.zip › 978984.f1/Table S4.xls]

## Sheet: lncRNAs_up
# Fold Change cut-off: 2.0 # Condition pairs: pcDNA3.1-PinX1 vs Empty Vector # Column A: ProbeName, it represents probe name. # Column B: Fold change, positive value indicates up-regulation and negative value indicates down-regulation. # Column C: Log Fold change, log2 value of absolute fold change. Positive value indicates up-regulation and negative value indicates down-regulation. # Column D: A…
pcDNA3.1-Pinx1 vs Empty Vector 2.0 fold up regulated LncRNAs
	Fold Change and Regulation				Annotations																		Raw Intensities		Normalized Intensities
ProbeName	Fold change([pcDNA3.1-PinX1] vs [Empty Vector])	Log Fold change([pcDNA3.1-PinX1] vs [Empty Vector])	Absolute Fold change([pcDNA3.1-PinX1] vs [Empty Vector])	Regulation([pcDNA3.1-PinX1] vs [Empty Vector])	type	seqname	GeneSymbol	source	RNAlength	chrom	strand	txStart	txEnd	Xhyb	probeSeq	relationship	Associated_gene_acc	Associated_gene_name	Associated_protein_name	Associated_gene_strand	Associated_gene_start	Associated_gene_end	[pcDNA3.1-PinX1](raw)	[Empty Vector](raw)	[pcDNA3.1-PinX1](normalized)	[Empty Vector](normalized)
ASHG19A3A053659	2.17457	1.12073	2.17457	up	noncoding	ENST00000379752	RP11-110J1.2	Ensembl	1532	chr1	-	157029022	157030554	NM_018225,	GCATCCTCTGATGGCACTGTAAAGATCTGGAATATGAAGACCACAGAATGTTCAGATACC	intergenic							947.118	493.613	9.97028	8.84955
ASHG19A3A037844	2.00589	1.00424	2.00589	up	noncoding	ENST00000457720	RP11-217B7.3	Ensembl	606	chr9	-	107753076	107754062		TTTTTAACTGGCAAGGTTTCGAGTTCCCAACCACAGCACCCTCAGTGATGGTTTTCAGAA	intergenic							126.689	70.7164	7.07	6.06577
ASHG19A3A008459	2.09814	1.06911	2.09814	up	noncoding	BC018035		NRED	458	chr17	-	43921245	43972139		GGCGAGGACGGGAGAGGACAGCGGAGGAGGAGAAGGTGGCTGTGGTGGCGGCGGCAGAAG	natural antisense	NM_001203251	MAPT	microtubule-associated protein tau isoform 7	+	43971747	44105699	704.848	379.891	9.54949	8.48038
ASHG19A3A008459	2.09814	1.06911	2.09814	up	noncoding	BC018035		NRED	458	chr17	-	43921245	43972139		GGCGAGGACGGGAGAGGACAGCGGAGGAGGAGAAGGTGGCTGTGGTGGCGGCGGCAGAAG	natural antisense	NM_005910	MAPT	microtubule-associated protein tau isoform 2	+	43971747	44105699	704.848	379.891	9.54949	8.48038
ASHG19A3A008459	2.09814	1.06911	2.09814	up	noncoding	BC018035		NRED	458	chr17	-	43921245	43972139		GGCGAGGACGGGAGAGGACAGCGGAGGAGGAGAAGGTGGCTGTGGTGGCGGCGGCAGAAG	natural antisense	NM_016841	MAPT	microtubule-associated protein tau isoform 4	+	43971747	44105699	704.848	379.891	9.54949	8.48038
ASHG19A3A008459	2.09814	1.06911	2.09814	up	noncoding	BC018035		NRED	458	chr17	-	43921245	43972139		GGCGAGGACGGGAGAGGACAGCGGAGGAGGAGAAGGTGGCTGTGGTGGCGGCGGCAGAAG	natural antisense	NM_016835	MAPT	microtubule-associated protein tau isoform 1	+	43971747	44105699	704.848	379.891	9.54949	8.48038
ASHG19A3A008459	2.09814	1.06911	2.09814	up	noncoding	BC018035		NRED	458	chr17	-	43921245	43972139		GGCGAGGACGGGAGAGGACAGCGGAGGAGGAGAAGGTGGCTGTGGTGGCGGCGGCAGAAG	natural antisense	NM_001203252	MAPT	microtubule-associated protein tau isoform 8	+	43971747	44105699	704.848	379.891	9.54949	8.48038
ASHG19A3A008459	2.09814	1.06911	2.09814	up	noncoding	BC018035		NRED	458	chr17	-	43921245	43972139		GGCGAGGACGGGAGAGGACAGCGGAGGAGGAGAAGGTGGCTGTGGTGGCGGCGGCAGAAG	natural antisense	NM_001123066	MAPT	microtubule-associated protein tau isoform 6	+	43971747	44105699	704.848	379.891	9.54949	8.48038
ASHG19A3A008459	2.09814	1.06911	2.09814	up	noncoding	BC018035		NRED	458	chr17	-	43921245	43972139		GGCGAGGACGGGAGAGGACAGCGGAGGAGGAGAAGGTGGCTGTGGTGGCGGCGGCAGAAG	natural antisense	NM_016834	MAPT	microtubule-associated protein tau isoform 3	+	43971747	44105699	704.848	379.891	9.54949	8.48038
ASHG19A3A008459	2.09814	1.06911	2.09814	up	noncoding	BC018035		NRED	458	chr17	-	43921245	43972139		GGCGAGGACGGGAGAGGACAGCGGAGGAGGAGAAGGTGGCTGTGGTGGCGGCGGCAGAAG	natural antisense	NM_001123067	MAPT	microtubule-associated protein tau isoform 5	+	43971747	44105699	704.848	379.891	9.54949	8.48038
ASHG19A3A008459	2.09814	1.06911	2.09814	up	noncoding	BC018035		NRED	458	chr17	-	43921245	43972139		GGCGAGGACGGGAGAGGACAGCGGAGGAGGAGAAGGTGGCTGTGGTGGCGGCGGCAGAAG	intronic antisense	NM_175882	IMP5	signal peptide peptidase-like 2C precursor	+	43922255	43924438	704.848	379.891	9.54949	8.48038
ASHG19A3A051733	3.05679	1.61202	3.05679	up	noncoding	NR_015340	SERPINA13	RefSeq_NR	1718	chr14	+	95107061	95113330		CAGTAATTACCATTGAGCAAACACCTACTATGTACCAAATGCTTTCTATCTCTTATCTCA	intergenic							156.161	57.5184	7.37163	5.75961
ASHG19A3L0002225	2.2231	1.15257	2.2231	up	noncoding	BC036853	lincRNA-PDCD1LG2-2	lincRNA	1660	chr9	-	5357968	5630071	NM_018465,	GGAGGTGCTCTAAATAACTTTTAGATTTCCTCTCTCTGTGTGCATTACCAATATCTAAGT	exon sense-overlapping	NM_018465	C9orf46	transmembrane protein C9orf46	-	5357966	5437937	9967.34	4990.64	13.3566	12.204
ASHG19A3L0002225	2.2231	1.15257	2.2231	up	noncoding	BC036853	lincRNA-PDCD1LG2-2	lincRNA	1660	chr9	-	5357968	5630071	NM_018465,	GGAGGTGCTCTAAATAACTTTTAGATTTCCTCTCTCTGTGTGCATTACCAATATCTAAGT	intronic antisense	NM_025239	PDCD1LG2	programmed cell death 1 ligand 2 precursor	+	5510544	5571282	9967.34	4990.64	13.3566	12.204
ASHG19A3L0002225	2.2231	1.15257	2.2231	up	noncoding	BC036853	lincRNA-PDCD1LG2-2	lincRNA	1660	chr9	-	5357968	5630071	NM_018465,	GGAGGTGCTCTAAATAACTTTTAGATTTCCTCTCTCTGTGTGCATTACCAATATCTAAGT	intronic antisense	NM_001135920	KIAA1432	protein RIC1 homolog isoform b	+	5629118	5769454	9967.34	4990.64	13.3566	12.204
ASHG19A3L0002225	2.2231	1.15257	2.2231	up	noncoding	BC036853	lincRNA-PDCD1LG2-2	lincRNA	1660	chr9	-	5357968	5630071	NM_018465,	GGAGGTGCTCTAAATAACTTTTAGATTTCCTCTCTCTGTGTGCATTACCAATATCTAAGT	intronic antisense	NM_001206557	KIAA1432	protein RIC1 homolog isoform c	+	5629118	5776556	9967.34	4990.64	13.3566	12.204
ASHG19A3L0002225	2.2231	1.15257	2.2231	up	noncoding	BC036853	lincRNA-PDCD1LG2-2	lincRNA	1660	chr9	-	5357968	5630071	NM_018465,	GGAGGTGCTCTAAATAACTTTTAGATTTCCTCTCTCTGTGTGCATTACCAATATCTAAGT	intronic antisense	NM_020829	KIAA1432	protein RIC1 homolog isoform a	+	5629118	5776556	9967.34	4990.64	13.3566	12.204
ASHG19A3L0002225	2.2231	1.15257	2.2231	up	noncoding	BC036853	lincRNA-PDCD1LG2-2	lincRNA	1660	chr9	-	5357968	5630071	NM_018465,	GGAGGTGCTCTAAATAACTTTTAGATTTCCTCTCTCTGTGTGCATTACCAATATCTAAGT	intronic antisense	NM_014143	CD274	programmed cell death 1 ligand 1 precursor	+	5450502	5470567	9967.34	4990.64	13.3566	12.204
ASHG19A3L0002292	2.2645	1.17919	2.2645	up	noncoding	chrX:38863681-38944131-	lincRNA-MID1IP1-2	lincRNA	80451	chrX	-	38863681	38944131		TTAATTAGGTGCCTAACCTTGATTGCAGGGAGTCAGGATATCTCTCCAACTCCACCTTCT	intergenic							242.879	119.946	8.00627	6.82708
ASHG19A3A024990	2.08409	1.05942	2.08409	up	noncoding	ENST00000513791	RP11-485C11.1	Ensembl	460	chr4	-	173301178	173301638		ATCCATTAGCAAATGATGCAGAGGAGCAGTGGAAACACCAACGAAGCCCAAGCCATATAA	intronic antisense	NM_001034845	GALNTL6	polypeptide	+	172734574	173961558	2202.02	1193.4	11.1963	10.1369
ASHG19A3A042061	2.18409	1.12703	2.18409	up	noncoding	ENST00000457163	AC006156.5	Ensembl	923	chrY	+	9385716	9388290		TTCTCATTCCACTCCAATTGATTGGTATCCAGATTATGAAGTGGAGGCCTATCGCCGCAA	intergenic							201.966	103.141	7.74295	6.61592
ASHG19A3A016770	2.66842	1.41599	2.66842	up	noncoding	uc010fsr.1	AK096649	UCSC_knowngene	2600	chr2	+	200323330	200325930		CTTCCGATTTAAAGGAGAGTTCTAGGAAGTTTTGTGATCTATGTCCGGTGTGGGTTTTTG	natural antisense	NM_001172517	SATB2	DNA-binding protein SATB2	-	200134222	200329831	2009.81	853.566	11.063	9.64702
ASHG19A3A016770	2.66842	1.41599	2.66842	up	noncoding	uc010fsr.1	AK096649	UCSC_knowngene	2600	chr2	+	200323330	200325930		CTTCCGATTTAAAGGAGAGTTCTAGGAAGTTTTGTGATCTATGTCCGGTGTGGGTTTTTG	natural antisense	NM_015265	SATB2	DNA-binding protein SATB2	-	200134222	200335989	2009.81	853.566	11.063	9.64702
ASHG19A3A016770	2.66842	1.41599	2.66842	up	noncoding	uc010fsr.1	AK096649	UCSC_knowngene	2600	chr2	+	200323330	200325930		CTTCCGATTTAAAGGAGAGTTCTAGGAAGTTTTGTGATCTATGTCCGGTGTGGGTTTTTG	bidirectional	NM_001172509	SATB2	DNA-binding protein SATB2	-	200134222	200322819	2009.81	853.566	11.063	9.64702
ASHG19A3A053205	24.3352	4.60497	24.3352	up	noncoding	NR_026869	NCRNA00052	RefSeq_NR	1786	chr15	+	88120159	88122917		CTCTAAGACTCAGAAGAACTTTCTCAGGCATTCATTTTCCTATCTATTTTGAGCCATTTT	intergenic							13001.7	600.168	13.7382	9.1332
ASHG19A3A009606	2.03548	1.02537	2.03548	up	noncoding	ENST00000514828	AC091132.1	Ensembl	429	chr17	+	43594141	43594671	uc010wkm.1,ENST00000510581,ENST00000508811,	ATGCCAAGATGAGTTTGTCAGTATAGCCGTATCCTGGAACTTCTTTTGTGAGCTAAAAAA	intergenic							8514.88	4627.43	13.128	12.1026
ASHG19A3A012995	3.89782	1.96267	3.89782	up	noncoding	uc001hyk.1	BC133032	UCSC_knowngene	316	chr1	-	237167402	237167718	NM_005951,ENST00000464121,	AGTGCAAAAAGTGCAAATGCACCTCCTGCAAGAAGAGCTGCTGCTCCTGTTGCCCCCTGG	intergenic							20767.7	5962.62	14.4201	12.4575
ASHG19A3A014042	3.17323	1.66595	3.17323	up	noncoding	uc002sva.1	DKFZp667P0924	UCSC_knowngene	2442	chr2	-	96523056	96610442	NM_025190,NM_025190,NM_001164315,NM_001164315,	AGAAAGTTTCTCTTTTGAATATTGCCACAAGAATAACGGGCGGTGGGAAATCTGGAACAG	intergenic							2981.23	1048.25	11.6174	9.95146
ASHG19A3A023200	2.01642	1.01179	2.01642	up	noncoding	ENST00000419531	RP4-794H19.2	Ensembl	2273	chr1	+	59250831	59366668		CCAATTCTGATCACTGCTCTTATGGTTTGTAATACATTATTTTGGGTTTGGATGATCCTG	intergenic							392.355	219.566	8.70768	7.69589
ASHG19A3A034440	2.00277	1.002	2.00277	up	noncoding	ENST00000453697	RP11-321E8.1	Ensembl	763	chr7	+	63894207	63894970	NR_029404,	AGGTCTTGCTCTCAAATTTTTCTGTATTCTACTACGAAATTCTTAATTCCCCTGACCATG	intergenic							730.613	414.478	9.60147	8.59947
ASHG19A3A019003	2.9094	1.54072	2.9094	up	noncoding	ENST00000446475	BX322563.3	Ensembl	552	chr21	-	46827300	46829980		CTGAAATTCAAAACTATCTTCCAAAGTCCTTGCATCTGAATCCTGAAGACTCCCCAGTGG	intronic antisense	NM_130445	COL18A1	collagen alpha-1(XVIII) chain isoform 2	+	46825096	46933634	583.768	226.928	9.28174	7.74102
ASHG19A3A009423	2.4907	1.31655	2.4907	up	noncoding	AK022182		misc_RNA	2893	chr17	+	34604166	34620584		AAGCCTGTGCCAAATACCAACGCTGCAGCATTAAGGAATGTGATAGAAAAGATTCTGAAT	intergenic							177.167	79.7696	7.55536	6.2388
ASHG19A3A011200	2.06425	1.04561	2.06425	up	noncoding	uc002ngr.2	BC039402	UCSC_knowngene	624	chr19	-	17555634	17559116		TCTATTTAGCAGGTGTGTGCTGGAATAGAACGTGGGGCATGGGACCCTGGGCTGGGTAGA	exon sense-overlapping	NM_001190844	TMEM221	transmembrane protein 221	-	17546317	17559376	97.0655	52.3537	6.67228	5.62666
ASHG19A3L0000845	2.79394	1.4823	2.79394	up	noncoding	BF850330	lincRNA-MESDC2	lincRNA	177	chr15	+	81260381	81260482		ATAAATTTCCATGTACCAGCAAGCAGCATGGTCATATTGCAGTCTCCTGCTAGACCGCTT	intergenic							144.62	58.0858	7.25798	5.77568
ASHG19A3A053582	2.58735	1.37147	2.58735	up	noncoding	AK097966		misc_RNA	1908	chr16	-	22424506	22427098		TCAGGTAATTACCCCCGCTCAAAACTAAAAACTGTCCAGTCGCCATTTTTTCTGTTTTTT	intergenic							165.893	71.7444	7.45658	6.08511
ASHG19A3A045517	2.21334	1.14623	2.21334	up	noncoding	AF074986		misc_RNA	627	chr11	-	76493622	76494248		TCTGGTTAGAGTTCTAAGAAGGGAAACTGGCGTGTGAGTAGGCAGCAGTTTCAGTCTATT	bidirectional	NM_015516	TSKU	tsukushin precursor	+	76494284	76509198	192.157	96.5567	7.66874	6.52252
ASHG19A3A023407	2.98438	1.57743	2.98438	up	noncoding	ENST00000460407	RP11-38P22.2	Ensembl	2050	chr3	+	152557178	152559228		TCATAATTGTGGTCACTAGAACTGTACTTACCATGGACAGTTAAAACTGAAAAAGACTCA	intergenic							205.768	77.3524	7.7706	6.19317
ASHG19A3A040306	2.55697	1.35444	2.55697	up	noncoding	ENST00000428194	RP11-232D9.2	Ensembl	957	chrX	-	115803777	115814271	NM_007231,	CTGGATGGGGCATTTTAATTGCAGCTGTGCTGGAGCTAGTTGGAATCATCTGGATTTATG	intergenic							11989.2	5176.64	13.6151	12.2607
ASHG19A3A024604	2.38487	1.25391	2.38487	up	noncoding	uc003hzj.3	BC009800	UCSC_knowngene	953	chr4	-	110351122	110354973		TATGGCATTCCAGTTGAGTTTCACCACGCATTATCATGAGAATAAATAATTTCACTGACT	natural antisense	NM_006323	SEC24B	protein transport protein Sec24B isoform a	+	110354970	110461615	155.012	72.8294	7.36064	6.10673
ASHG19A3A024604	2.38487	1.25391	2.38487	up	noncoding	uc003hzj.3	BC009800	UCSC_knowngene	953	chr4	-	110351122	110354973		TATGGCATTCCAGTTGAGTTTCACCACGCATTATCATGAGAATAAATAATTTCACTGACT	natural antisense	NM_001042734	SEC24B	protein transport protein Sec24B isoform b	+	110354970	110461615	155.012	72.8294	7.36064	6.10673
ASHG19A3H0000127	2.11112	1.07801	2.11112	up	noncoding	nc-HOXC5-253-	nc-HOXC5-253	HOX cluster	278	chr12	+	54425091	54425369		ACAAAATTCCTTCTTCATTACAGCTCCAGCCGGGCTGGTTCCTTACTTTTCTCTCCTCAA	intron sense-overlapping	NM_014620	HOXC4	homeobox protein Hox-C4	+	54410641	54449814	304.721	162.925	8.34354	7.26553
ASHG19A3A045233	5.16674	2.36925	5.16674	up	noncoding	ENST00000450983	RP4-669L17.2	Ensembl	607	chr1	-	453632	460480		CAATCCTGGGGCAGGGAGGGGAGGCCCAGCTGAGTTTGGATCATAATCCTGAAAGACACA	intergenic							807.161	176.047	9.74451	7.37526
ASHG19A3A026261	2.20999	1.14404	2.20999	up	noncoding	ENST00000513444	RP11-366M4.4	Ensembl	1419	chr4	+	165836716	165838135		GAGCACTTTGGCCTTATTTTTATACTGGAACTGACTCAAAACCTCTTAAAATTTCTACAG	intergenic							553.87	284.054	9.20991	8.06588
ASHG19A3A021440	2.34162	1.2275	2.34162	up	noncoding	uc003ebh.1	BC016962	UCSC_knowngene	1794	chr3	-	114033681	114035475		GTGACAGTATCCTTACCTGCCATTTAATATTAGCCTCGTATTTTTCTCACGTATATTTAC	intergenic							283.085	135.972	8.2321	7.00459
ASHG19A3A000261	2.63976	1.40041	2.63976	up	noncoding	ENST00000441071	RP5-1073O3.7	Ensembl	571	chr1	-	114466621	114471940		TCTGGGTAGAACAGATCCTGCTCAGAATGTATAAACCAGGAAAAGTTGTTCTGGCCCCTC	bidirectional	NM_198268	HIPK1	homeodomain-interacting protein kinase 1 isoform	+	114471995	114520491	484.649	208.089	9.01787	7.61746
ASHG19A3A000261	2.63976	1.40041	2.63976	up	noncoding	ENST00000441071	RP5-1073O3.7	Ensembl	571	chr1	-	114466621	114471940		TCTGGGTAGAACAGATCCTGCTCAGAATGTATAAACCAGGAAAAGTTGTTCTGGCCCCTC	bidirectional	NM_152696	HIPK1	homeodomain-interacting protein kinase 1 isoform	+	114471995	114514698	484.649	208.089	9.01787	7.61746
ASHG19A3A029712	2.25238	1.17145	2.25238	up	noncoding	ENST00000419679	XXbac-BPG32J3.18	Ensembl	461	chr6	-	31732086	31733365		TTTAGCTGTTGAGTTAAGAAACAGAAAAAGGAGCCTGGGGCTTCTGACTCTTTCACCAGG	natural antisense	NM_001039651	C6orf26	protein G7d	+	31730772	31732624	362.147	182.179	8.59619	7.42473
ASHG19A3L0002508	2.36466	1.24163	2.36466	up	noncoding	CN413083	lincRNA-UFC1	lincRNA	687	chr1	+	161106389	161107075		TTTTGTAAAACCTCCCAGGATGATAGTAAGAGTTGGCACAAAAAGAGGTTAATAGGTGCT	intergenic							196.717	92.7362	7.70281	6.46118
ASHG19A3A014064	3.99641	1.9987	3.99641	up	noncoding	ENST00000421314	MTL1	Ensembl	186	chr1	-	16567707	16567893	NM_005952,	AATGAAAAGAGTGCACATGCACCTCCTGCAAGAAGAGCTGCTGCTCCTGCTGCCCTGTGG	intergenic							23960.5	6636.12	14.6119	12.6132
ASHG19A3A008285	2.93098	1.55138	2.93098	up	noncoding	ENST00000422603	RP4-652L8.2	Ensembl	519	chr1	-	176585403	176585922		GAAGATGCAGTACAATTCATAGGACAAAAGCGGAGTGGAGCTTTTAAAAGCAAGCAACTT	intronic antisense	NM_020318	PAPPA2	pappalysin-2 isoform 1	+	176432306	176811970	1124.58	434.819	10.2235	8.67213
ASHG19A3A008285	2.93098	1.55138	2.93098	up	noncoding	ENST00000422603	RP4-652L8.2	Ensembl	519	chr1	-	176585403	176585922		GAAGATGCAGTACAATTCATAGGACAAAAGCGGAGTGGAGCTTTTAAAAGCAAGCAACTT	intronic antisense	NM_021936	PAPPA2	pappalysin-2 isoform 2	+	176432306	176660341	1124.58	434.819	10.2235	8.67213
ASHG19A3A026148	4.62501	2.20946	4.62501	up	noncoding	ENST00000505168	RP11-588F18.1	Ensembl	528	chr4	+	151948241	151948769		TGACCCTACATTTACACACTTTTCTCGAACAAGATCACACCTATTCAGTCCAAAGAAGCA	intergenic							525.162	128.214	9.13249	6.92303
ASHG19A3A031877	2.1135	1.07964	2.1135	up	noncoding	ENST00000406773	RP1-121G13.3	Ensembl	777	chr6	+	100978151	100978928		AGTACAGTGATTGCAAATCACGTGTCTAATTATGATGAAGGAGCATGGCCTGTTCTTATT	intronic antisense	NM_006828	ASCC3	activating signal cointegrator 1 complex subunit	-	100956607	101329224	281.756	149.825	8.22543	7.1458
ASHG19A3A009002	2.57989	1.36731	2.57989	up	noncoding	ENST00000413077	AC012146.7	Ensembl	474	chr17	+	5015226	5017672		ATTCATAGGGCTTTTCTCCACTATGAATTCTATGATGTCGAATAAAGTGTGAGCTCTGAT	natural antisense	NM_014519	ZNF232	zinc finger protein 232	-	5009030	5026397	3870.83	1675.43	11.9929	10.6255
ASHG19A3A039217	2.10504	1.07385	2.10504	up	noncoding	ENST00000411924	RP11-417B4.3	Ensembl	246	chr9	+	126521498	126522054		GACTTTGTCAAGATGGACTAGAAGAGGTCACTGAGTTTGAAATCACACCAGAAGGAAGAA	intronic antisense	NM_020946	DENND1A	DENN domain-containing protein 1A isoform 1	-	126141932	126692417	4939.88	2643.22	12.3505	11.2767
ASHG19A3A039217	2.10504	1.07385	2.10504	up	noncoding	ENST00000411924	RP11-417B4.3	Ensembl	246	chr9	+	126521498	126522054		GACTTTGTCAAGATGGACTAGAAGAGGTCACTGAGTTTGAAATCACACCAGAAGGAAGAA	intronic antisense	NM_024820	DENND1A	DENN domain-containing protein 1A isoform 2	-	126163869	126692417	4939.88	2643.22	12.3505	11.2767
ASHG19A3A026667	2.01765	1.01267	2.01765	up	noncoding	ENST00000507566	CTD-2024P10.1	Ensembl	407	chr5	-	34656516	34657355		TCGAGGCGGCGGCGGCGCTCCCCGGACCCAGCTGGCTGCTCCACCCCGCCCGCCGCTTCC	natural antisense	NM_015577	RAI14	ankycorbin isoform a	+	34656432	34832717	1157.46	650.501	10.2663	9.25363
ASHG19A3A026667	2.01765	1.01267	2.01765	up	noncoding	ENST00000507566	CTD-2024P10.1	Ensembl	407	chr5	-	34656516	34657355		TCGAGGCGGCGGCGGCGCTCCCCGGACCCAGCTGGCTGCTCCACCCCGCCCGCCGCTTCC	natural antisense	NM_001145522	RAI14	ankycorbin isoform b	+	34656432	34832717	1157.46	650.501	10.2663	9.25363
ASHG19A3A026667	2.01765	1.01267	2.01765	up	noncoding	ENST00000507566	CTD-2024P10.1	Ensembl	407	chr5	-	34656516	34657355		TCGAGGCGGCGGCGGCGCTCCCCGGACCCAGCTGGCTGCTCCACCCCGCCCGCCGCTTCC	natural antisense	NM_001145520	RAI14	ankycorbin isoform a	+	34656595	34832717	1157.46	650.501	10.2663	9.25363
ASHG19A3A030722	3.17671	1.66753	3.17671	up	noncoding	ENST00000416894	RP11-54A4.8	Ensembl	566	chr1	+	150488232	150490508		CTCTTAATGTATTTCTGCACTCTACACTAGCAGCCTATTACACAGGACACTTGGATGTCT	intergenic							262.32	92.1846	8.12034	6.4528
ASHG19A3A027282	2.32886	1.21963	2.32886	up	noncoding	ENST00000504479	RP11-950K24.1	Ensembl	192	chr5	-	118468385	118468577		ATAGCCAGCAGCAATGCCAATATAGGACTAATTGTCAACCCAGAAAAGGGACTTGCTCCA	intronic antisense	NM_005509	DMXL1	dmX-like protein 1	+	118407083	118584822	487.862	238.016	9.02856	7.80893
ASHG19A3A020677	2.05686	1.04045	2.05686	up	noncoding	uc003brm.2	BC036698	UCSC_knowngene	3252	chr3	-	9391373	9438338		ATGACCACATGTGGGACTATTTCAACTGCCACGAGAAATCCCAGAAGGATTATTGTTTTG	intronic antisense	NM_001114092	THUMPD3	THUMP domain-containing protein 3	+	9404716	9428475	435.625	240.411	8.86341	7.82296
ASHG19A3A020677	2.05686	1.04045	2.05686	up	noncoding	uc003brm.2	BC036698	UCSC_knowngene	3252	chr3	-	9391373	9438338		ATGACCACATGTGGGACTATTTCAACTGCCACGAGAAATCCCAGAAGGATTATTGTTTTG	intronic antisense	NM_015453	THUMPD3	THUMP domain-containing protein 3	+	9404716	9428475	435.625	240.411	8.86341	7.82296
ASHG19A3A009460	2.06322	1.0449	2.06322	up	noncoding	AK096059		misc_RNA	2036	chr17	+	37705193	37707229		TTACATGCAAAATGGCATGCAAATGAGGCCTGGTGCCTTTTGGGGTATGAATCGTAGAAC	intergenic							137.854	74.6834	7.18885	6.14395
ASHG19A3A040726	2.18787	1.12953	2.18787	up	noncoding	ENST00000416049	RP5-958B3.2	Ensembl	131	chrX	+	18359335	18359466		GGAGAACACCCTGCTGACCAAAGAGGCCATTGAGCAGGAGAAGCGGGTGAAATTTCCTAA	intronic antisense	NM_006089	SCML2	sex comb on midleg-like protein 2	-	18257432	18372844	45354.9	22450.4	15.5069	14.3773
ASHG19A3L0000239	2.89492	1.53352	2.89492	up	noncoding	EL585127	lincRNA-ZNF37A-2	lincRNA	805	chr10	-	38779976	39150281		GATCCTATTCAAATCCCTTTACCTCCCATTTAATTTCCATTCCATTTCGGGTTGGTTCCA	intergenic							2424.7	944.722	11.3301	9.79655
ASHG19A3A050879	2.12614	1.08824	2.12614	up	noncoding	uc001ejp.3	FLJ39739	UCSC_knowngene	2387	chr1	-	143647638	143744587	uc001eql.2,	GAGAGGTACCAAATCACATTCCAGTTTATTTCTCAACTCTAATAATGTCCCTTTCTTCAT	intergenic							148.953	78.475	7.30296	6.21472
ASHG19A3A033296	2.06931	1.04915	2.06931	up	noncoding	ENST00000468165	RP11-514P8.2	Ensembl	541	chr7	-	102067264	102075227		TAGTACTAATGGCCAGAAATGGCTACAGGACATGTCCTGCCTAAATATCATCTCCTGCAC	intronic antisense	NM_032831	ORAI2	protein orai-2	+	102073995	102097268	211.387	114.305	7.80974	6.76059
ASHG19A3A033296	2.06931	1.04915	2.06931	up	noncoding	ENST00000468165	RP11-514P8.2	Ensembl	541	chr7	-	102067264	102075227		TAGTACTAATGGCCAGAAATGGCTACAGGACATGTCCTGCCTAAATATCATCTCCTGCAC	intronic antisense	NM_001126340	ORAI2	protein orai-2	+	102073995	102097268	211.387	114.305	7.80974	6.76059
CUST_516_PI426073487	2.23355	1.15934	2.23355	up	noncoding	uc.37-	uc.37	UCR	202	chr1	-	115280052	115280254		GTATGCTACGAACGTAATGGGGTAAACTTGTGTATTTTTCTTAAACCTTTGCCTGATCCA	exon sense-overlapping	NM_001007553	CSDE1	cold shock domain-containing protein E1 isoform	-	115259537	115300624	493.317	250.422	9.04511	7.88578
CUST_516_PI426073487	2.23355	1.15934	2.23355	up	noncoding	uc.37-	uc.37	UCR	202	chr1	-	115280052	115280254		GTATGCTACGAACGTAATGGGGTAAACTTGTGTATTTTTCTTAAACCTTTGCCTGATCCA	intron sense-overlapping	NM_007158	CSDE1	cold shock domain-containing protein E1 isoform	-	115259536	115300624	493.317	250.422	9.04511	7.88578
CUST_516_PI426073487	2.23355	1.15934	2.23355	up	noncoding	uc.37-	uc.37	UCR	202	chr1	-	115280052	115280254		GTATGCTACGAACGTAATGGGGTAAACTTGTGTATTTTTCTTAAACCTTTGCCTGATCCA	intron sense-overlapping	NM_001130523	CSDE1	cold shock domain-containing protein E1 isoform	-	115259537	115300671	493.317	250.422	9.04511	7.88578
ASHG19A3A025932	18.6939	4.2245	18.6939	up	noncoding	ENST00000504097	RP11-397D21.1	Ensembl	155	chr4	+	114761205	114761392		GTAGATTCACTTTCACCTGAGAATCCTCTGCAAGAACCATTTTAAAATGCGTGGAACTAT	intergenic							977.624	58.7487	10.0171	5.79256
ASHG19A3A040026	2.53892	1.34422	2.53892	up	noncoding	ENST00000453086	RP5-1091N2.3	Ensembl	375	chrX	-	70236380	70236755		TAAAGAACATCAACGATGCTTTCACCAATGACATGTTCAGGCTTGCCCTGCACAACTTCG	intergenic							1722.91	767.359	10.841	9.49681
ASHG19A3A028220	2.34455	1.22931	2.34455	up	noncoding	ENST00000454560	RP5-965F6.1	Ensembl	304	chr1	+	112905902	112906206		TGGGCTCCAGTTTTTGGAGCTAATAAGGAAAAACTTGAAGCCACCATTAATAAATTGGTC	intergenic							285.06	136.654	8.24141	7.0121
ASHG19A3A045653	2.53243	1.34052	2.53243	up	noncoding	AK098142		misc_RNA	2364	chr11	-	106555150	106557515		AATGTACTACCCTGTATCTTCTTTGTGGACCTTAATCATTAGGTAACATTGGCCATAATA	intergenic							130.638	57.9662	7.11212	5.7716
ASHG19A3A030477	2.26765	1.1812	2.26765	up	noncoding	ENST00000431104	RP11-510H23.3	Ensembl	484	chr6	-	125329900	125330635		AATTATACAACAGCTTTGATTCTCCTACTCTTTATCTTTACTCAAGTGCTGGCAATGGAC	natural antisense	NM_152553	RNF217	probable E3 ubiquitin-protein ligase RNF217	+	125304513	125404661	253.308	125.05	8.06926	6.88806
ASHG19A3A033857	2.26432	1.17908	2.26432	up	noncoding	ENST00000423008	AC091729.9	Ensembl	1401	chr7	+	1200009	1204903		CGCAGCCGGGCGGGCGAGGAGCGGGGAAGCTGACTCAGGGCTGCGGCCGGGGTCCTGCGG	bidirectional	NM_182491	ZFAND2A	AN1-type zinc finger protein 2A	-	1192542	1199855	176.668	87.4831	7.55148	6.3724
ASHG19A3L0000818	2.04574	1.03262	2.04574	up	noncoding	chr15:56580983-56592133-	lincRNA-RFX7	lincRNA	11151	chr15	-	56580983	56592133		TCACATTCTGTTACCAATGAGGTGGCAGGGGTGCCTGCTCCCTGGGCACCAATGCCATTA	intergenic							162.14	88.6491	7.42536	6.39274
ASHG19A3A013505	4.40699	2.13979	4.40699	up	noncoding	AK055915		RNAdb	2192	chr2	-	37869086	37871279		GCATCATGTGGAAGAATGGGAACTATGCTTACTTTATGAAGTGATGTATAACACAATGAA	exon sense-overlapping	NM_006449	CDC42EP3	cdc42 effector protein 3	-	37870742	37899326	216.016	55.1653	7.83997	5.70017
ASHG19A3A025962	8.80054	3.13759	8.80054	up	noncoding	AK021986		NRED	1914	chr4	+	119963178	119965092		TGCACAGGTTTGATGCCATGTGGTCAATGAATGACTGATCTGTTCATTGTATTTTGTTTG	intron sense-overlapping	NM_133477	SYNPO2	synaptopodin-2 isoform a	+	119809995	119982402	529.6	67.9787	9.14544	6.00784
ASHG19A3A035937	2.42268	1.2766	2.42268	up	noncoding	ENST00000504145	AF117829.2	Ensembl	1572	chr8	-	90729655	90769939		GCCCGGGTCGCGCAGCGGAGGCCGAGGGCTGGGACGGGCGGCTGGGAAGTGGGAAAGGGA	bidirectional	NM_003821	RIPK2	receptor-interacting serine/threonine-protein	+	90769974	90803292	186.387	86.1398	7.62508	6.34848
ASHG19A3A053898	2.13173	1.09203	2.13173	up	noncoding	ENST00000437157	RP3-510D11.1	Ensembl	548	chr1	-	9228326	9262678	AK123145,	ATCCGCCCTTTCGTTTTGCGCAGGTGGAGATCTCGCGGGCCCAGTTCGGAGTCCTGCAAA	intergenic							118.757	62.3471	6.97394	5.88191
ASHG19A3A038095	2.91488	1.54344	2.91488	up	noncoding	uc004bvv.1	Y16709	UCSC_knowngene	154	chr9	-	131457267	131457421		TACAGAGAAAGGAGGAAAAAAGCTAGAATTCTATGCACTACTACACAGGGGCCTAGCACC	natural antisense	NM_003011	SET	protein SET isoform 2	+	131451508	131458675	1867.3	726.502	10.9579	9.41443
ASHG19A3A038095	2.91488	1.54344	2.91488	up	noncoding	uc004bvv.1	Y16709	UCSC_knowngene	154	chr9	-	131457267	131457421		TACAGAGAAAGGAGGAAAAAAGCTAGAATTCTATGCACTACTACACAGGGGCCTAGCACC	natural antisense	NM_001122821	SET	protein SET isoform 1	+	131445933	131458675	1867.3	726.502	10.9579	9.41443
ASHG19A3A036866	2.04572	1.03261	2.04572	up	noncoding	BC047094		misc_RNA	1101	chr8	+	117800241	117801325		TCAAAAACGTTTCATGGGCATGTTTGTAGGAGCGTGGATCAATCCAGTGAGTGTGGATCA	intergenic							231.441	126.711	7.93909	6.90649
ASHG19A3L0000775	4.7825	2.25776	4.7825	up	noncoding	AB208948	lincRNA-STON2-2	lincRNA	4302	chr14	-	81726999	81893748	BX648249,	CTGTAGAGGTGAGGTTTTGTTTTTAGTTGTTCTACTGATTATATCCTTTTCTGAGCTATG	exon sense-overlapping	NM_033104	STON2	stonin-2	-	81736908	81864927	3198.3	749.324	11.7162	9.45843
ASHG19A3A041509	2.01915	1.01375	2.01915	up	noncoding	ENST00000416086	RP5-1032F13.1	Ensembl	1285	chrX	+	127848483	127849768		AGGATAGTGGACCACAAAGTGGTGTCCGAAACCAATGAAACCAAAGTTCTGAGACATTGA	intergenic							233.733	129.556	7.95128	6.93753
ASHG19A3A022244	2.86192	1.51698	2.86192	up	noncoding	AK022202		NRED	2491	chr3	+	10011656	10014146		GTGACTCCCATTCTGAATTCCATTCCCTAGAGGAAATCACAAGTGTTGGTGTGTTCCATA	natural antisense	NM_018447	TMEM111	transmembrane protein 111	-	10005635	10028522	841.98	332.378	9.80585	8.28887
ASHG19A3A009654	2.62512	1.39238	2.62512	up	noncoding	ENST00000480386	RP11-357H14.4	Ensembl	566	chr17	+	46706036	46712294		CCAAATTCTCTACTAGGCCTCCGAACCAAAACGAAGGAAAATCCGTTTTCTTCTTGGGCT	intergenic							123.786	53.0235	7.03549	5.64311
ASHG19A3A018599	2.05938	1.04221	2.05938	up	noncoding	ENST00000455524	RP13-152O15.5	Ensembl	188	chr20	+	62688155	62688437		GGGGCTCGGCCCCCGGTGAGGCTGGCTGCAGGTGACCACAGAGACCTAGCCTGGTGTCGT	intergenic							102.57	55.6588	6.7564	5.71419
ASHG19A3L0001002	2.24322	1.16557	2.24322	up	noncoding	DA829587	lincRNA-ZNF516-2	lincRNA	815	chr18	+	73178827	73179640		TGTATCTCCTTTTCAATCTGCCTAAAATGACAGCTGGGCTTCCGACAGTGGGTTTCTTAT	intergenic							248.776	124.156	8.04325	6.87768
ASHG19A3A023971	2.91326	1.54264	2.91326	up	noncoding	uc003gnd.3	BC070495	UCSC_knowngene	1273	chr4	-	14472091	14473364		GGCCAGTTTTCAACATTCGGTCTGAAATTGAGGAGTTGCTGTATGAAAAGTGAATTTATT	intergenic							651.959	252.152	9.43946	7.89682
ASHG19A3A024839	2.13325	1.09305	2.13325	up	noncoding	ENST00000504437	RP11-655B23.1	Ensembl	649	chr4	-	149447644	149448293		ATGGACTGGGAAGTGCATAAAGTCAAACAGGCCTCGGCTTGAAATTTGCTGAGCTGATAT	intergenic							552.559	293.883	9.20687	8.11382
ASHG19A3A021283	2.77183	1.47084	2.77183	up	noncoding	BC017743		RNAdb	2299	chr3	-	78870333	78872608		CAGAAACGATGGGAAAATGTGATGAAGAGCATCCCAAGAGCTGAAAATGCATTGGCAAAA	intron sense-overlapping	NM_133631	ROBO1	roundabout homolog 1 isoform b	-	78646387	79068609	1132.39	463.531	10.2325	8.76164
ASHG19A3A021283	2.77183	1.47084	2.77183	up	noncoding	BC017743		RNAdb	2299	chr3	-	78870333	78872608		CAGAAACGATGGGAAAATGTGATGAAGAGCATCCCAAGAGCTGAAAATGCATTGGCAAAA	intron sense-overlapping	NM_002941	ROBO1	roundabout homolog 1 isoform a precursor	-	78646387	79817059	1132.39	463.531	10.2325	8.76164
ASHG19A3A021283	2.77183	1.47084	2.77183	up	noncoding	BC017743		RNAdb	2299	chr3	-	78870333	78872608		CAGAAACGATGGGAAAATGTGATGAAGAGCATCCCAAGAGCTGAAAATGCATTGGCAAAA	intron sense-overlapping	NM_001145845	ROBO1	roundabout homolog 1 isoform d	-	78646387	79068609	1132.39	463.531	10.2325	8.76164
ASHG19A3A055310	2.2068	1.14196	2.2068	up	noncoding	uc010zaz.1	LOC150776	UCSC_knowngene	1304	chr2	+	132250385	132273977		CTCTGAAGCGGGCGACGCTATGGGTCCCACAGGAGCTGCACACCATCTTCCCATGGCTGG	bidirectional	NM_001085365	MZT2A	mitotic-spindle organizing protein 2A	-	132241532	132250064	328.606	168.161	8.45024	7.30828
ASHG19A3A013734	2.06011	1.04272	2.06011	up	noncoding	ENST00000448204	AC114752.1	Ensembl	289	chr2	-	64557619	64559265		TGCCCTTTACTCTGCGGAGCCCAGCTTCCTACTGCAGTAAACTCTCACATGGCCAAGAAG	intergenic							179.748	97.1671	7.57452	6.5318
ASHG19A3A000502	2.15952	1.11071	2.15952	up	noncoding	ENST00000513560	RP11-159F24.1	Ensembl	1040	chr5	-	43575424	43603206		agaagaatctagacagacaggcctttctaggctgtacaagaagcatgatgccagcatctg	natural antisense	NM_012343	NNT	"NAD(P) transhydrogenase, mitochondrial"	+	43602790	43705668	138.384	71.7227	7.19515	6.08444
ASHG19A3A000502	2.15952	1.11071	2.15952	up	noncoding	ENST00000513560	RP11-159F24.1	Ensembl	1040	chr5	-	43575424	43603206		agaagaatctagacagacaggcctttctaggctgtacaagaagcatgatgccagcatctg	bidirectional	NM_182977	NNT	"NAD(P) transhydrogenase, mitochondrial"	+	43603228	43705668	138.384	71.7227	7.19515	6.08444
ASHG19A3A028474	2.89884	1.53547	2.89884	up	noncoding	ENST00000512479	CTC-447O6.1	Ensembl	322	chr5	+	85383343	85383665		CTGGTTGATGTATTGCTATTCATTGTGTTGCAGGCCTTCAGAGAGCTCCAATACTTGTTG	intergenic							636.12	247.603	9.40245	7.86698
ASHG19A3A000042	2.04756	1.03391	2.04756	up	noncoding	BC052961		NRED	4283	chr3	-	9430536	9438342		ATCAAATTTGAATGGATGAGGAGTTGCTTTTTAGGTTGCTCCTTGAGGGCAGGACAGTTC	intergenic							1465.62	808.556	10.6054	9.57153
ASHG19A3A014204	2.17469	1.12081	2.17469	up	noncoding	NR_024373	LOC541471	RefSeq_NR	557	chr2	-	112186889	112252692	NR_024206,NR_024205,NR_024204,	TGGCCAGTCTCTGTGTGTCTTAATCCCTTGTCCTTCATTAAAAGCAAAACTAAAGAAAAC	intergenic							17635.8	8986.42	14.1836	13.0628
ASHG19A3A028512	4.43057	2.14749	4.43057	up	noncoding	CR624187		RNAdb	2237	chr5	+	90664552	90666786		AGTAGACAATTCTGAGCATGTGCATACGCAGGTAAAGTCCAGGCTATATTAAATAAAAAA	natural antisense	NM_020801	ARRDC3	arrestin domain-containing protein 3	-	90664540	90679149	3679.97	934.57	11.9243	9.77684
ASHG19A3A021522	2.42151	1.2759	2.42151	up	noncoding	ENST00000506660	RP11-71E19.5	Ensembl	986	chr3	-	126111874	126113694		GCGGGCCGCGGGACAGGGAGGGCGCGGGGCCGGGCTGCTGGGTCCGAGCTCTGGGCACGA	bidirectional	NM_182628	CCDC37	coiled-coil domain-containing protein 37	+	126113781	126155398	461.081	215.171	8.94307	7.66716
ASHG19A3A008323	3.13389	1.64796	3.13389	up	noncoding	ENST00000508151	AC006070.12	Ensembl	193	chr17	-	39343195	39343388		GTGAGTTCAGTTGCTACCATCCAGTCTGCTGCCAGACCACCAATCTGTGGATCCTGTTGT	intergenic							235.533	84.0311	7.96219	6.31423
ASHG19A3A045283	2.19729	1.13572	2.19729	up	noncoding	AK001998		NRED	1768	chr11	-	62553024	62554791		TCAGTTCAAACAATCTGCATAAAAACAACCAACCAGAGACTTGGACTCTGATTATACAAT	bidirectional	NM_199337	TMEM179B	transmembrane protein 179B	+	62554873	62557872	180.922	91.8284	7.58285	6.44713
ASHG19A3A045283	2.19729	1.13572	2.19729	up	noncoding	AK001998		NRED	1768	chr11	-	62553024	62554791		TCAGTTCAAACAATCTGCATAAAAACAACCAACCAGAGACTTGGACTCTGATTATACAAT	natural antisense	NM_006473	TAF6L	TAF6-like RNA polymerase II p300/CBP-associated	+	62538774	62554813	180.922	91.8284	7.58285	6.44713
ASHG19A3A045006	2.08448	1.05968	2.08448	up	noncoding	ENST00000506599	RP11-322N21.2	Ensembl	395	chr1	-	46641157	46642150		AGGGCCATGGGTATCAACAACACCCACACTGACACCACCATAGTGTGGATCTTCCCACCT	intronic antisense	NM_005727	TSPAN1	tetraspanin-1	+	46640748	46651634	115.798	62.0794	6.93462	5.87494
ASHG19A3A043590	2.05478	1.03898	2.05478	up	noncoding	ENST00000456526	RP11-428L9.2	Ensembl	677	chr10	+	9012087	9015431		TAGATATATAGGAGGTTGTGGCTGCTCCAGCAGCTTGGATTCAGAGTGAGAAGGCATAAA	intergenic							438.529	242.018	8.87328	7.8343
ASHG19A3A021452	2.84896	1.51044	2.84896	up	noncoding	ENST00000482142	RP11-384F7.1	Ensembl	787	chr3	-	117723665	118276515		AAATTAAGCTGGAGTGCACTTTGGTCCCAGCTCCACTACAACACTATTTTGTGACCACAG	intergenic							223.197	87.5785	7.88468	6.37425
ASHG19A3L0003517	5.78551	2.53244	5.78551	up	noncoding	BC150253	lincRNA-SEMA6D-3	lincRNA	5955	chr15	+	47476402	48066417	NM_153618,NM_020858,	CGGCATAAAAAGTAACCCTCAAGTGAAGTGTCTCTATACTGTTTTATAGAGTACTTTAAC	exon sense-overlapping	NM_001198999	SEMA6D	semaphorin-6D isoform 1 precursor	+	47476402	48066420	1372.49	266.615	10.5098	7.97738
ASHG19A3L0003517	5.78551	2.53244	5.78551	up	noncoding	BC150253	lincRNA-SEMA6D-3	lincRNA	5955	chr15	+	47476402	48066417	NM_153618,NM_020858,	CGGCATAAAAAGTAACCCTCAAGTGAAGTGTCTCTATACTGTTTTATAGAGTACTTTAAC	exon sense-overlapping	NM_024966	SEMA6D	semaphorin-6D isoform 6 precursor	+	48010685	48057677	1372.49	266.615	10.5098	7.97738
ASHG19A3L0003517	5.78551	2.53244	5.78551	up	noncoding	BC150253	lincRNA-SEMA6D-3	lincRNA	5955	chr15	+	47476402	48066417	NM_153618,NM_020858,	CGGCATAAAAAGTAACCCTCAAGTGAAGTGTCTCTATACTGTTTTATAGAGTACTTTAAC	exon sense-overlapping	NM_020858	SEMA6D	semaphorin-6D isoform 1 precursor	+	48010685	48066420	1372.49	266.615	10.5098	7.97738
ASHG19A3L0003517	5.78551	2.53244	5.78551	up	noncoding	BC150253	lincRNA-SEMA6D-3	lincRNA	5955	chr15	+	47476402	48066417	NM_153618,NM_020858,	CGGCATAAAAAGTAACCCTCAAGTGAAGTGTCTCTATACTGTTTTATAGAGTACTTTAAC	exon sense-overlapping	NM_153618	SEMA6D	semaphorin-6D isoform 4 precursor	+	48010685	48066420	1372.49	266.615	10.5098	7.97738
ASHG19A3L0003517	5.78551	2.53244	5.78551	up	noncoding	BC150253	lincRNA-SEMA6D-3	lincRNA	5955	chr15	+	47476402	48066417	NM_153618,NM_020858,	CGGCATAAAAAGTAACCCTCAAGTGAAGTGTCTCTATACTGTTTTATAGAGTACTTTAAC	exon sense-overlapping	NM_153617	SEMA6D	semaphorin-6D isoform 3 precursor	+	48010685	48066420	1372.49	266.615	10.5098	7.97738
ASHG19A3L0003517	5.78551	2.53244	5.78551	up	noncoding	BC150253	lincRNA-SEMA6D-3	lincRNA	5955	chr15	+	47476402	48066417	NM_153618,NM_020858,	CGGCATAAAAAGTAACCCTCAAGTGAAGTGTCTCTATACTGTTTTATAGAGTACTTTAAC	exon sense-overlapping	NM_153616	SEMA6D	semaphorin-6D isoform 2 precursor	+	48010685	48066420	1372.49	266.615	10.5098	7.97738
ASHG19A3L0003517	5.78551	2.53244	5.78551	up	noncoding	BC150253	lincRNA-SEMA6D-3	lincRNA	5955	chr15	+	47476402	48066417	NM_153618,NM_020858,	CGGCATAAAAAGTAACCCTCAAGTGAAGTGTCTCTATACTGTTTTATAGAGTACTTTAAC	exon sense-overlapping	NM_153619	SEMA6D	semaphorin-6D isoform 5 precursor	+	48010685	48066420	1372.49	266.615	10.5098	7.97738
ASHG19A3A042421	2.47224	1.30582	2.47224	up	noncoding	AB073357		misc_RNA	1840	chr10	-	8107688	8109159		TATGAGTTATCTCCAGTGCTCAGATATCCGGCAGCTTTTTCCTAGGAAGTCAGCTTTGCA	intronic antisense	NM_002051	GATA3	trans-acting T-cell-specific transcription	+	8096666	8117164	2370.82	1079.65	11.2981	9.99226
ASHG19A3A042421	2.47224	1.30582	2.47224	up	noncoding	AB073357		misc_RNA	1840	chr10	-	8107688	8109159		TATGAGTTATCTCCAGTGCTCAGATATCCGGCAGCTTTTTCCTAGGAAGTCAGCTTTGCA	intronic antisense	NM_001002295	GATA3	trans-acting T-cell-specific transcription	+	8096666	8117164	2370.82	1079.65	11.2981	9.99226
ASHG19A3A018684	2.48745	1.31467	2.48745	up	noncoding	ENST00000433524	AP000705.8	Ensembl	1386	chr21	-	23507017	23508403		GGTAAGTGTTGTGCCAGTCTAGAGATTCTGGAAGGTAAATTCTTCCTTTTGTTTGCCTCC	intergenic							139.927	62.9048	7.21029	5.89562
ASHG19A3A014101	2.40457	1.26578	2.40457	up	noncoding	ENST00000443030	AC092168.4	Ensembl	236	chr2	-	101338682	101339344		ACAACATCCCGACTCCATTCCAGAGCAGCTGGGAGCCTACAGCAGCCTAGGAATCTCCAT	intergenic							387.165	182.069	8.68985	7.42408
ASHG19A3L0003183	2.03971	1.02836	2.03971	up	noncoding	chr13:99325739-99331929-	lincRNA-STK24	lincRNA	6191	chr13	-	99325739	99331929		CTATGTAAAGTGCTTGGACTTGGCTCATTGAAGTGCTCTTAGATGCTCCAATGATAGTAT	intergenic							95.98	52.4468	6.65718	5.62882
ASHG19A3A037734	2.33871	1.22571	2.33871	up	noncoding	ENST00000454651	RP11-134G8.7	Ensembl	340	chr1	+	201476368	201502736		GCCACCGCGGAAAACGTCTTGCACGTGCGAGGGGCATTTCAGGAGTTTCCTGTCTGTCAG	natural antisense	NM_004078	CSRP1	cysteine and glycine-rich protein 1 isoform 1	-	201452657	201476387	189.911	90.5188	7.65042	6.42471
ASHG19A3A037734	2.33871	1.22571	2.33871	up	noncoding	ENST00000454651	RP11-134G8.7	Ensembl	340	chr1	+	201476368	201502736		GCCACCGCGGAAAACGTCTTGCACGTGCGAGGGGCATTTCAGGAGTTTCCTGTCTGTCAG	bidirectional	NM_001193571	CSRP1	cysteine and glycine-rich protein 1 isoform 1	-	201452657	201475967	189.911	90.5188	7.65042	6.42471
ASHG19A3A037734	2.33871	1.22571	2.33871	up	noncoding	ENST00000454651	RP11-134G8.7	Ensembl	340	chr1	+	201476368	201502736		GCCACCGCGGAAAACGTCTTGCACGTGCGAGGGGCATTTCAGGAGTTTCCTGTCTGTCAG	natural antisense	NM_001193570	CSRP1	cysteine and glycine-rich protein 1 isoform 3	-	201452657	201476387	189.911	90.5188	7.65042	6.42471
ASHG19A3A034263	3.19024	1.67367	3.19024	up	noncoding	ENST00000441052	AC017116.8	Ensembl	2590	chr7	+	44079121	44081905		ATTCTTAACCTTAAAGGGCTCTCAATATGGAGATAGAACACTGGAGTCGAAGTCCCAGCC	intergenic							496.16	176.588	9.05384	7.38017
ASHG19A3A013223	2.20209	1.13887	2.20209	up	noncoding	ENST00000335179	AC010907.3	Ensembl	210	chr2	-	3665137	3665347	uc002qyd.1,NM_183049,NM_021109,ENST00000415187,	GAAAAATCCACTGCCTTCCAAAGAAACGACTGAACAGGAGAAGCAAGCAGGCAAATCGTA	intronic antisense	NM_024027	COLEC11	collectin-11 isoform a	+	3642636	3692047	92846.6	42780	16.4802	15.3413
ASHG19A3A013223	2.20209	1.13887	2.20209	up	noncoding	ENST00000335179	AC010907.3	Ensembl	210	chr2	-	3665137	3665347	uc002qyd.1,NM_183049,NM_021109,ENST00000415187,	GAAAAATCCACTGCCTTCCAAAGAAACGACTGAACAGGAGAAGCAAGCAGGCAAATCGTA	intronic antisense	NM_199235	COLEC11	collectin-11 isoform b	+	3642636	3692047	92846.6	42780	16.4802	15.3413
ASHG19A3A046112	2.06053	1.04302	2.06053	up	noncoding	AK057956		misc_RNA	2122	chr11	+	8018915	8021037		CTCATGACCATAGTGTGGTGTTATTACTTAGCGTTATTCTAGACTTATTAGCCATTGTAT	intergenic							330.513	181.001	8.45823	7.41521
ASHG19A3A019393	2.04537	1.03236	2.04537	up	noncoding	BC062773		misc_RNA	859	chr1	+	32320889	32321713		GGCCCCAGACTACGTCCTTCAGATGCTGTAAAAGTGATAAAAATTATATTTATCTCGTGG	intergenic							113.763	62.1214	6.90859	5.87623
ASHG19A3A016841	2.00133	1.00096	2.00133	up	noncoding	HIT000095376		H-invDB	421	chr1	+	17028041	17032104		TGCAGACAGCCTTTCCCCCAAGAATGAGACTCTCCACCACCTGGAAACAACTTGCCGAGG	intergenic							1538.02	865.927	10.6684	9.66746
ASHG19A3A052502	2.33623	1.22418	2.33623	up	noncoding	AL109959		misc_RNA	1237	chr15	-	85165252	85166468		TATACGGGACTTGACTCAGACCACTAAAATGACAGTGTCCTGGAAATGAGGATGAGCAAG	natural antisense	NM_181877	ZSCAN2	zinc finger and SCAN domain-containing protein 2	+	85144248	85166947	161.651	77.4843	7.42095	6.19677
ASHG19A3A021377	5.80478	2.53724	5.80478	up	noncoding	AY831680		misc_RNA	1267	chr3	-	107749849	107751108		CGTCTGCTGGTGATAAGATCAGATTAACCTATTTCAACTTGATAGCTAGATTCTGACACA	intergenic							2051.75	400.915	11.0931	8.55584
ASHG19A3A037624	9.8882	3.30571	9.8882	up	noncoding	CR597008		misc_RNA	479	chr9	-	85158634	85159111		CCACAGGAATCTGCTCTTTGATGCCAAGTGTATAGATTTCATGATCAAATAAAATGTTTG	intergenic							705.328	80.0813	9.55037	6.24466
ASHG19A3L0000871	3.20586	1.68071	3.20586	up	noncoding	AA782034	lincRNA-CDH11-3	lincRNA	196	chr16	-	65808988	65809184		AATTCCGTGCACCATTAAGCTTCAAAACCCATTCCATTCGCACTGAGCAGGTGTGGTTTT	intergenic							2251.33	794.839	11.2268	9.54609
ASHG19A3L0002753	2.21057	1.14442	2.21057	up	noncoding	BG977395	lincRNA-PSTPIP1	lincRNA	207	chr15	+	77271788	77271888		TTCATCTCAGAGATCTCAGTCTTTGTGCGCCGCAGGTCATCCCCTGTGCTTCCCATGCCA	intergenic							1620.47	827.889	10.7491	9.60471
ASHG19A3A027392	2.12813	1.08959	2.12813	up	noncoding	BC040980		NRED	3380	chr5	-	132157834	132166361		ACCCCTACATCTACTCCCTGCAAATCTGTTATTTCCCTTGACATTCAGCAAATATTTGGG	exon sense-overlapping	NM_001172700	SHROOM1	protein Shroom1 isoform 1	-	132157832	132166590	610.229	324.162	9.34336	8.25377
ASHG19A3A027392	2.12813	1.08959	2.12813	up	noncoding	BC040980		NRED	3380	chr5	-	132157834	132166361		ACCCCTACATCTACTCCCTGCAAATCTGTTATTTCCCTTGACATTCAGCAAATATTTGGG	exon sense-overlapping	NM_133456	SHROOM1	protein Shroom1 isoform 2	-	132157832	132162002	610.229	324.162	9.34336	8.25377
ASHG19A3A052914	2.77388	1.4719	2.77388	up	noncoding	AK022018		NRED	2187	chr15	+	57364370	57366558		TAAAAGAGACCCCCAGAACAGTTATTTCTACTTGTGCAGGACTTGAAGGACAGAGTCACT	intron sense-overlapping	NM_207036	TCF12	transcription factor 12 isoform a	+	57210832	57580714	228.933	91.9508	7.92065	6.44874
ASHG19A3A052914	2.77388	1.4719	2.77388	up	noncoding	AK022018		NRED	2187	chr15	+	57364370	57366558		TAAAAGAGACCCCCAGAACAGTTATTTCTACTTGTGCAGGACTTGAAGGACAGAGTCACT	intron sense-overlapping	NM_207037	TCF12	transcription factor 12 isoform a	+	57210832	57580714	228.933	91.9508	7.92065	6.44874
ASHG19A3A052914	2.77388	1.4719	2.77388	up	noncoding	AK022018		NRED	2187	chr15	+	57364370	57366558		TAAAAGAGACCCCCAGAACAGTTATTTCTACTTGTGCAGGACTTGAAGGACAGAGTCACT	intron sense-overlapping	NM_207038	TCF12	transcription factor 12 isoform b	+	57210832	57580714	228.933	91.9508	7.92065	6.44874
ASHG19A3A052914	2.77388	1.4719	2.77388	up	noncoding	AK022018		NRED	2187	chr15	+	57364370	57366558		TAAAAGAGACCCCCAGAACAGTTATTTCTACTTGTGCAGGACTTGAAGGACAGAGTCACT	intron sense-overlapping	NM_003205	TCF12	transcription factor 12 isoform b	+	57210832	57580714	228.933	91.9508	7.92065	6.44874
ASHG19A3A017915	2.30887	1.20719	2.30887	up	noncoding	uc002yew.1	AK056267	UCSC_knowngene	3039	chr20	-	62023922	62026961		TGTTCACCTTGCCTGTGTCACACATGAGAAGACTGAGACTCAGTGAGGGCCCAGCAGAGC	intergenic							282.044	137.513	8.22681	7.01962
ASHG19A3A038742	3.01641	1.59283	3.01641	up	noncoding	ENST00000500756	AC119673.2	Ensembl	977	chr1	+	205685227	205719310		TGGGAGCAGCATTTAACATATTCCTAGTCAAGGACAGGATGGGAAGTAAGTGAAGAATAG	natural antisense	NM_022731	NUCKS1	nuclear ubiquitous casein and cyclin-dependent	-	205681946	205719372	330.686	123.108	8.45904	6.86621
ASHG19A3A019403	2.16786	1.11627	2.16786	up	noncoding	ENST00000448070	LA16c-4G1.4	Ensembl	121	chr22	-	16076051	16076172	ENST00000442207,ENST00000431077,ENST00000425632,AK126828,	TGCCATCCTCCTCCTGTATCTGCCAGAGGAAGACACCTTCTGGGCACTGGATCAGCTGAT	intergenic							534.053	279.156	9.15623	8.03996
ASHG19A3A033493	2.35386	1.23503	2.35386	up	noncoding	ENST00000490314	AC073934.6	Ensembl	495	chr7	-	127284738	127292066		GTAACAGCAAACTAGATTAACCATGGCATAAACATACAGAAGTCCCCCCTTATCTGAAAG	bidirectional	NM_014390	SND1	staphylococcal nuclease domain-containing	+	127292201	127732659	2393.01	1146.16	11.3125	10.0775
ASHG19A3A043674	2.29028	1.19553	2.29028	up	noncoding	ENST00000434717	RP11-288D15.2	Ensembl	398	chr10	+	19340383	19341099		ACATTTACAAGACGGACAGGAATGATAATTGGACCTCCAAGAACAATTTATGAAAACCGA	intergenic							329.913	162.225	8.45584	7.26031
CUST_43_PI426073487	4.39719	2.13658	4.39719	up	noncoding	uc.45+	uc.45	UCR	203	chr1	+	245016685	245016888		TGACTCACAATTTCATTAGCTTACAAAGATGGTGGAGTTAACTACTACAAGCACACTAGT	natural antisense	NM_004501	HNRNPU	heterogeneous nuclear ribonucleoprotein U	-	245013601	245027827	305.579	78.3044	8.34826	6.21167
CUST_43_PI426073487	4.39719	2.13658	4.39719	up	noncoding	uc.45+	uc.45	UCR	203	chr1	+	245016685	245016888		TGACTCACAATTTCATTAGCTTACAAAGATGGTGGAGTTAACTACTACAAGCACACTAGT	natural antisense	NM_031844	HNRNPU	heterogeneous nuclear ribonucleoprotein U	-	245013601	245027827	305.579	78.3044	8.34826	6.21167
ASHG19A3A018247	2.39395	1.2594	2.39395	up	noncoding	NR_028046	ACSS2	RefSeq_NR	2864	chr20	+	33462765	33515769		TAGATATTTAAGAATCCTTCCTGCCTTGACAGCCAGTCTGTGAAATGATGGTGAGGTGGG	exon sense-overlapping	NM_018677	ACSS2	"acetyl-coenzyme A synthetase, cytoplasmic"	+	33464327	33515769	142.858	66.6433	7.23904	5.97964
ASHG19A3A018247	2.39395	1.2594	2.39395	up	noncoding	NR_028046	ACSS2	RefSeq_NR	2864	chr20	+	33462765	33515769		TAGATATTTAAGAATCCTTCCTGCCTTGACAGCCAGTCTGTGAAATGATGGTGAGGTGGG	exon sense-overlapping	NM_001076552	ACSS2	"acetyl-coenzyme A synthetase, cytoplasmic"	+	33464327	33515769	142.858	66.6433	7.23904	5.97964
ASHG19A3A042410	2.69599	1.43081	2.69599	up	noncoding	AK057130		misc_RNA	3156	chr10	-	7200571	7203727		GACGAAGGGCATGCTTTTGGTTTGCTGTAAGATTGTATTCTGTATATATGTTTTCATGTA	exon sense-overlapping	NM_001018039	SFMBT2	scm-like with four MBT domains protein 2	-	7200585	7451303	1754.84	738.488	10.8686	9.43781
ASHG19A3A042410	2.69599	1.43081	2.69599	up	noncoding	AK057130		misc_RNA	3156	chr10	-	7200571	7203727		GACGAAGGGCATGCTTTTGGTTTGCTGTAAGATTGTATTCTGTATATATGTTTTCATGTA	exon sense-overlapping	NM_001029880	SFMBT2	scm-like with four MBT domains protein 2	-	7200585	7453448	1754.84	738.488	10.8686	9.43781
ASHG19A3A051206	2.02736	1.0196	2.02736	up	noncoding	uc001ysv.2	BC042994	UCSC_knowngene	2071	chr14	-	106576815	106598011		AGGAGGTGCATTTCGATGGAACTTTGGTGAAAACCTTGGTCTTTATCCCATTTCCTCTGG	intergenic							104.809	57.8627	6.7886	5.76899
ASHG19A3A051486	2.67363	1.4188	2.67363	up	noncoding	AK022120		NRED	1901	chr14	+	60563761	60565662		GCGGGGTGCTTACCATATAACTTGTAAACCAAAGCATGAAATATATGTTTCTGTTTAAAC	intron sense-overlapping	NM_022495	C14orf135	pecanex-like protein C14orf135	+	60558628	60601532	205.547	86.2418	7.76915	6.35035
ASHG19A3A012534	2.6527	1.40746	2.6527	up	noncoding	ENST00000509942	AC008555.5	Ensembl	3105	chr19	+	35414102	35417732		TTTGTTTTTGCTTTTTCTGACCTGGTGTGTTAATGCCCTGGGTTGGCCCTCTAAGAAGCT	intergenic							340.589	144.807	8.50052	7.09306
ASHG19A3A040613	2.37516	1.24802	2.37516	up	noncoding	ENST00000415016	RP13-228J13.9	Ensembl	335	chrX	-	154441198	154441916		TTAAATTTGTACAGCCGGGAACCGACAACAACTCTCACTCCATCTTTGCCTGGAAGCTTT	intergenic							148.319	69.8287	7.29522	6.0472
ASHG19A3L0002626	2.09061	1.06393	2.09061	up	noncoding	BF445802	lincRNA-NR2F2-3	lincRNA	375	chr15	+	96787623	96787999		ACCATTTGGGTTTCTCTCCTCTAGTTCCTGAATCCCACTGGAGAAGCCATAGTTTTTCTT	intergenic							140.265	74.9431	7.21304	6.14911
ASHG19A3A033056	2.01724	1.01239	2.01724	up	noncoding	NR_003262	FDPSL2A	RefSeq_NR	4981	chr7	-	76099337	76104317		GAGACTGCAAGGGCGGGGAGAGAAGGCTCTCAATAAGTAAATTATTGTGTAAAATAAATA	intronic antisense	NM_001102595	DTX2	protein deltex-2 isoform a	+	76090971	76135312	7102.16	3914.63	12.8714	11.859
ASHG19A3A033056	2.01724	1.01239	2.01724	up	noncoding	NR_003262	FDPSL2A	RefSeq_NR	4981	chr7	-	76099337	76104317		GAGACTGCAAGGGCGGGGAGAGAAGGCTCTCAATAAGTAAATTATTGTGTAAAATAAATA	natural antisense	NM_020892	DTX2	protein deltex-2 isoform a	+	76090971	76135312	7102.16	3914.63	12.8714	11.859
ASHG19A3A033056	2.01724	1.01239	2.01724	up	noncoding	NR_003262	FDPSL2A	RefSeq_NR	4981	chr7	-	76099337	76104317		GAGACTGCAAGGGCGGGGAGAGAAGGCTCTCAATAAGTAAATTATTGTGTAAAATAAATA	intronic antisense	NM_001102594	DTX2	protein deltex-2 isoform a	+	76090971	76135312	7102.16	3914.63	12.8714	11.859
ASHG19A3H0000089	2.76185	1.46564	2.76185	up	noncoding	nc-HOXB2-163-	nc-HOXB2-163	HOX cluster	208	chr17	-	46625816	46626024		GGACTCTTGGATGCTCTCTGTAGGTTTTTCTGTTTGGCCTGTATGCCTCTAGGTTTTTCA	intergenic							155.197	62.9493	7.36242	5.89679
ASHG19A3A053055	3.02553	1.59719	3.02553	up	noncoding	AK125505		misc_RNA	2050	chr1	-	155284586	155286601		ATCTTGTTTCAGCCACCACCACTCAACCATGATGGTCTCCAAGATAATTAATTCCATGGC	intronic antisense	NM_001135821	FDPS	farnesyl pyrophosphate synthase isoform a	+	155278704	155290457	372.725	139.245	8.6356	7.03841
ASHG19A3A053055	3.02553	1.59719	3.02553	up	noncoding	AK125505		misc_RNA	2050	chr1	-	155284586	155286601		ATCTTGTTTCAGCCACCACCACTCAACCATGATGGTCTCCAAGATAATTAATTCCATGGC	intronic antisense	NM_002004	FDPS	farnesyl pyrophosphate synthase isoform a	+	155278538	155290457	372.725	139.245	8.6356	7.03841
ASHG19A3A053055	3.02553	1.59719	3.02553	up	noncoding	AK125505		misc_RNA	2050	chr1	-	155284586	155286601		ATCTTGTTTCAGCCACCACCACTCAACCATGATGGTCTCCAAGATAATTAATTCCATGGC	intronic antisense	NM_001135822	FDPS	farnesyl pyrophosphate synthase isoform b	+	155278538	155290457	372.725	139.245	8.6356	7.03841
ASHG19A3A046873	2.54316	1.34662	2.54316	up	noncoding	ENST00000424138	RP11-397C12.1	Ensembl	456	chr1	-	66508182	66516401		GAGCTCTGGCCATGCCTTATACTTTCTTTTAACTTATTGTTCTGCCCTTTGAATTCAATA	intronic antisense	NM_002600	PDE4B	"cAMP-specific 3',5'-cyclic phosphodiesterase 4B"	+	66258855	66840262	145.31	63.8867	7.26549	5.91887
ASHG19A3A046873	2.54316	1.34662	2.54316	up	noncoding	ENST00000424138	RP11-397C12.1	Ensembl	456	chr1	-	66508182	66516401		GAGCTCTGGCCATGCCTTATACTTTCTTTTAACTTATTGTTCTGCCCTTTGAATTCAATA	intronic antisense	NM_001037340	PDE4B	"cAMP-specific 3',5'-cyclic phosphodiesterase 4B"	+	66458389	66840262	145.31	63.8867	7.26549	5.91887
ASHG19A3A046873	2.54316	1.34662	2.54316	up	noncoding	ENST00000424138	RP11-397C12.1	Ensembl	456	chr1	-	66508182	66516401		GAGCTCTGGCCATGCCTTATACTTTCTTTTAACTTATTGTTCTGCCCTTTGAATTCAATA	intronic antisense	NM_001037341	PDE4B	"cAMP-specific 3',5'-cyclic phosphodiesterase 4B"	+	66258192	66840262	145.31	63.8867	7.26549	5.91887
ASHG19A3A011345	2.2719	1.1839	2.2719	up	noncoding	NR_024562	LOC100128675	RefSeq_NR	1124	chr19	-	35549963	35597208		AACTTTTAACCACGTGGTTTGTTATGCATGTCACACCCACAGGCCACTTCAAACTTGCAG	natural antisense	NM_002151	HPN	serine protease hepsin	+	35531409	35557477	110.865	54.6776	6.87059	5.68669
ASHG19A3A011345	2.2719	1.1839	2.2719	up	noncoding	NR_024562	LOC100128675	RefSeq_NR	1124	chr19	-	35549963	35597208		AACTTTTAACCACGTGGTTTGTTATGCATGTCACACCCACAGGCCACTTCAAACTTGCAG	natural antisense	NM_182983	HPN	serine protease hepsin	+	35531409	35557477	110.865	54.6776	6.87059	5.68669
ASHG19A3A032731	2.61954	1.38931	2.61954	up	noncoding	ENST00000457315	AC004692.4	Ensembl	355	chr7	-	43278664	43288867		TCACCAGGACAGTTTTATTTCTGTGCTGAGCTTGCTGCTTCCTGCTGGGAAAATGTTAGT	intronic antisense	NM_015052	HECW1	E3 ubiquitin-protein ligase HECW1	+	43152197	43602938	149.508	63.9265	7.30933	5.92002
ASHG19A3A035058	2.21838	1.1495	2.21838	up	noncoding	uc003voy.2	BC035417	UCSC_knowngene	1034	chr7	+	129142319	129152772		CGGCAAGAAACACTGGGTTTCCTTAGGAACATTCCTCTCTTGGGCACCATTTCCTTTTTT	exon sense-overlapping	NM_001195243	LOC100287482	hypothetical protein LOC100287482	+	129142319	129152773	2584.8	1320.85	11.4282	10.2787
ASHG19A3A007334	2.00763	1.00549	2.00763	up	noncoding	NR_024531	RPL23AP7	RefSeq_NR	529	chr2	-	114379304	114384715		GAAGTGGATTTGGGAGACATTTAGGAGAAGAATCCCAGTCTTCTTAGAGAACCCAGTGAC	bidirectional	NM_007082	RABL2A	rab-like protein 2A	+	114384816	114400975	594.429	335.386	9.30768	8.30219
ASHG19A3A007334	2.00763	1.00549	2.00763	up	noncoding	NR_024531	RPL23AP7	RefSeq_NR	529	chr2	-	114379304	114384715		GAAGTGGATTTGGGAGACATTTAGGAGAAGAATCCCAGTCTTCTTAGAGAACCCAGTGAC	bidirectional	NM_013412	RABL2A	rab-like protein 2A	+	114384816	114400975	594.429	335.386	9.30768	8.30219
ASHG19A3A038311	2.23028	1.15722	2.23028	up	noncoding	ENST00000427722	RP11-509J21.3	Ensembl	537	chr9	+	3674545	3691814		GCCAGAATTATTCATATGTCTCACTACAGGATGGGCCGGGAGTGTACCTTCATTATGTAG	intergenic							289.213	145.931	8.26253	7.10531
ASHG19A3A027321	2.43039	1.28119	2.43039	up	noncoding	ENST00000509010	RP11-395P13.6	Ensembl	602	chr5	-	124731071	124731673		TTATGCTCTGCTCAGGGCTGCTGCTGAATGCAATGGCACTGGCTTACTCAAAATAATAAT	intergenic							114.87	52.9908	6.92326	5.64207
ASHG19A3A047778	2.88726	1.5297	2.88726	up	noncoding	ENST00000417216	RBMS1P1	Ensembl	1122	chr12	-	66627852	66628974	NM_002897,	TGTATCTGCCTACCAGGTGCAAAGTCCTTCTTGGACGCAACCTCAACCATATATTCTACA	intronic antisense	NM_001142523	IRAK3	interleukin-1 receptor-associated kinase 3	+	66582977	66648394	801.71	313.558	9.73557	8.20587
ASHG19A3A047778	2.88726	1.5297	2.88726	up	noncoding	ENST00000417216	RBMS1P1	Ensembl	1122	chr12	-	66627852	66628974	NM_002897,	TGTATCTGCCTACCAGGTGCAAAGTCCTTCTTGGACGCAACCTCAACCATATATTCTACA	intronic antisense	NM_007199	IRAK3	interleukin-1 receptor-associated kinase 3	+	66582977	66648394	801.71	313.558	9.73557	8.20587
ASHG19A3A047457	4.51767	2.17558	4.51767	up	noncoding	ENST00000438686	AC022080.2	Ensembl	672	chr12	-	31768701	31769373	NM_203464,NM_013410,NM_001005353,ENST00000505168,	CCCTACGTTTACACACTTTTCTCAAACAAGATCACACCTATTCAGTCCAAAGAAGCATAT	intergenic							616.454	153.49	9.35643	7.18085
ASHG19A3A021843	2.06585	1.04674	2.06585	up	noncoding	ENST00000488999	RP11-290K4.2	Ensembl	716	chr3	-	157734004	157806772		AGCCATCCCATCATCCCATGCTTCTCTTCCTACCTAATTGGGTACAGAATGAGAAAAACA	intergenic							289.068	157.156	8.26213	7.21539
ASHG19A3A041633	3.36525	1.75071	3.36525	up	noncoding	ENST00000430109	RP4-758J18.10	Ensembl	510	chr1	-	1365918	1369953		TTGCCTAAAAAAGGAAGCAGCAGGCTGAGGCTGAGGAGCTGGCGGCAGGAACAAGGGAGA	bidirectional	NM_022834	VWA1	von Willebrand factor A domain-containing	+	1370902	1378262	166.796	55.7223	7.4668	5.71609
ASHG19A3A041633	3.36525	1.75071	3.36525	up	noncoding	ENST00000430109	RP4-758J18.10	Ensembl	510	chr1	-	1365918	1369953		TTGCCTAAAAAAGGAAGCAGCAGGCTGAGGCTGAGGAGCTGGCGGCAGGAACAAGGGAGA	bidirectional	NM_199121	VWA1	von Willebrand factor A domain-containing	+	1370902	1378262	166.796	55.7223	7.4668	5.71609
ASHG19A3A035088	2.1947	1.13402	2.1947	up	noncoding	ENST00000457638	AC093106.4	Ensembl	1053	chr7	+	131350338	131812561		TTTTTATAAGCAAGATGGGCTGTGGCTCTGGATACCTGGCTCAAATTTCTCAGTCCCCAA	natural antisense	NM_020911	PLXNA4	plexin-A4 isoform 1	-	131808090	132261323	161.81	82.5081	7.42256	6.28854
ASHG19A3L0003431	2.12875	1.09001	2.12875	up	noncoding	chr2:121182275-121194039+	lincRNA-GLI2-3	lincRNA	11765	chr2	+	121182275	121194039		ATTTTACCACTCAGCTTCTCTTTTTCTTTTCTGCAAGGTGAGGGTAACTCTCCTGCCCAG	intergenic							196.004	102.513	7.69777	6.60776
ASHG19A3A023439	3.66645	1.87438	3.66645	up	noncoding	ENST00000480817	RP11-555M1.3	Ensembl	320	chr3	+	156881240	156886922		ATTTGTGAAGATCTGAGCCCTCAGGTCCTCAATGGTCTTGAAATAATGGCTCCAGTCTCT	intergenic							471.637	145.428	8.97455	7.10017
ASHG19A3A010001	3.17286	1.66578	3.17286	up	noncoding	AK057984		misc_RNA	1767	chr17	+	75559449	75564777		ATCTCCTTCCCAGCTCTCCTTTTCTGTAAGACTTCACAGAACAGGTTCAAAATCCATTTG	intergenic							4141.52	1456.11	12.0894	10.4236
ASHG19A3L0000388	2.25039	1.17018	2.25039	up	noncoding	DA706379	lincRNA-C1QTNF4	lincRNA	574	chr11	-	47629926	47630498		TTTAAACAAGACTAATTCCATCATCTCCCCCAATCGAACTTTGAAATTTCTGTCCACCTT	intergenic							15041.2	7422.9	13.9481	12.7779
ASHG19A3A007260	3.40499	1.76765	3.40499	up	noncoding	NR_024178	LOC284100	RefSeq_NR	2455	chr17	-	36202572	36244363		CTGGCAAGTCCAAGGTTTTCTATTATGAAATGAAAGGGGTCTACCACAGGTATCTGGCAG	intergenic							276.511	90.8412	8.19772	6.43007
ASHG19A3A036687	2.00007	1.00005	2.00007	up	noncoding	NR_033651	LOC100132891	RefSeq_NR	4207	chr8	+	72756350	72968546		CCCGTGGACATCCCGTTGTCCCCCTTGCCCACACGCGTCCTCTTTCCTCCCCCCTGGCCA	natural antisense	NM_005098	MSC	musculin	-	72753776	72756731	8981.58	4990.97	13.2044	12.2043
ASHG19A3A036687	2.00007	1.00005	2.00007	up	noncoding	NR_033651	LOC100132891	RefSeq_NR	4207	chr8	+	72756350	72968546		CCCGTGGACATCCCGTTGTCCCCCTTGCCCACACGCGTCCTCTTTCCTCCCCCCTGGCCA	natural antisense	NM_007332	TRPA1	transient receptor potential cation channel	-	72933485	72987819	8981.58	4990.97	13.2044	12.2043
ASHG19A3A007182	2.22428	1.15334	2.22428	up	noncoding	NR_015389	LOC339290	RefSeq_NR	3979	chr18	+	5238098	5246503		AGGCCCTGGCCACTACCAGGAAAAAATCCTTTGCACATGGCCTGCTATCAACAATCCTCT	intergenic							281.891	142.816	8.22637	7.07304
ASHG19A3A009864	2.22515	1.1539	2.22515	up	noncoding	AF119885		misc_RNA	1269	chr17	+	67144320	67146580		GTTGTATCAATTTTATCATCAACATTTCCCAGCTCCTGCTCTTTACAGAGTTCTAAGAAT	natural antisense	NM_080282	ABCA10	ATP-binding cassette sub-family A member 10	-	67144147	67240956	145.512	73.1727	7.26765	6.11375
ASHG19A3A035475	2.03184	1.02279	2.03184	up	noncoding	uc003wqw.1	AF355799	UCSC_knowngene	496	chr8	-	6844699	6847243	ENST00000453669,	CTCCTGTACCTTGTCCTCCATTTCCTTTTCTCATCCAAAATAAATACCTTGTTGCAAGAT	intergenic							302.134	168.095	8.33028	7.30749
ASHG19A3A043851	2.13644	1.09521	2.13644	up	noncoding	ENST00000442526	RP11-517P14.2	Ensembl	303	chr10	+	43916046	43917254		GAAGCTGTTTCTACACTCTCCTGAATGACCATTTTATAGATGCTGGGAAAAAATTGTATT	intergenic							493.59	261.989	9.04582	7.95061
ASHG19A3A053923	2.11995	1.08403	2.11995	up	noncoding	ENST00000493458	AC009120.3	Ensembl	463	chr16	-	74346506	74347288		TTTGTGAGAACAGGGAAAACGAACCCAAGCTGCTGGAACCCAATCCTCTTGAATTAATGG	intergenic							692.177	369.919	9.52373	8.4397
CUST_824_PI426073487	2.24529	1.1669	2.24529	up	noncoding	uc.345-	uc.345	UCR	301	chr12	-	54447599	54447900		GTCGTTTTTCTGCTCCATAAAGCCCTCCTACTAGCTAGCGACCCTGTAAAGTTACTTTCA	natural antisense	NM_014620	HOXC4	homeobox protein Hox-C4	+	54410641	54449814	262.789	131.273	8.12287	6.95597
CUST_824_PI426073487	2.24529	1.1669	2.24529	up	noncoding	uc.345-	uc.345	UCR	301	chr12	-	54447599	54447900		GTCGTTTTTCTGCTCCATAAAGCCCTCCTACTAGCTAGCGACCCTGTAAAGTTACTTTCA	natural antisense	NM_153633	HOXC4	homeobox protein Hox-C4	+	54447660	54449814	262.789	131.273	8.12287	6.95597
ASHG19A3A028514	2.84087	1.50633	2.84087	up	noncoding	ENST00000504259	CTD-2061E19.5	Ensembl	737	chr5	+	90676213	90734902		AGAAGACACCTGTATAAAAGGAAGAGGTCCCTATGAAGTGGTGATGGTCCATGAGGAAGA	intronic antisense	NM_020801	ARRDC3	arrestin domain-containing protein 3	-	90664540	90679149	149.88	59.3412	7.31316	5.80683
ASHG19A3A015926	2.09421	1.06641	2.09421	up	noncoding	ENST00000419718	AC111200.10	Ensembl	243	chr2	+	87098453	87098696	uc010fgu.1,NM_022662,	TGAATTATGGTCTTCTAATGGTGCTGCTGGCTTTGTGGGATCCCTTCAGGAGGTTACAAT	intergenic							689.845	372.441	9.51758	8.45117
ASHG19A3A016224	2.06648	1.04718	2.06648	up	noncoding	ENST00000445745	AC016683.6	Ensembl	2570	chr2	+	113993813	114024587	NR_015377,	GAGGCGCGACCCCTGGGCCCACCTGGCGGCCCGGCCGGCACAGCCCGCCTCTCCTCTCCA	intronic antisense	NM_013992	PAX8	paired box protein Pax-8 isoform PAX8E	-	113973573	114036498	405.935	222.362	8.76018	7.713
ASHG19A3A016224	2.06648	1.04718	2.06648	up	noncoding	ENST00000445745	AC016683.6	Ensembl	2570	chr2	+	113993813	114024587	NR_015377,	GAGGCGCGACCCCTGGGCCCACCTGGCGGCCCGGCCGGCACAGCCCGCCTCTCCTCTCCA	natural antisense	NM_003466	PAX8	paired box protein Pax-8 isoform PAX8A	-	113973573	114036498	405.935	222.362	8.76018	7.713
ASHG19A3A016224	2.06648	1.04718	2.06648	up	noncoding	ENST00000445745	AC016683.6	Ensembl	2570	chr2	+	113993813	114024587	NR_015377,	GAGGCGCGACCCCTGGGCCCACCTGGCGGCCCGGCCGGCACAGCCCGCCTCTCCTCTCCA	intronic antisense	NM_013953	PAX8	paired box protein Pax-8 isoform PAX8D	-	113973573	114036498	405.935	222.362	8.76018	7.713
ASHG19A3A016224	2.06648	1.04718	2.06648	up	noncoding	ENST00000445745	AC016683.6	Ensembl	2570	chr2	+	113993813	114024587	NR_015377,	GAGGCGCGACCCCTGGGCCCACCTGGCGGCCCGGCCGGCACAGCCCGCCTCTCCTCTCCA	natural antisense	NM_013952	PAX8	paired box protein Pax-8 isoform PAX8C	-	113973573	114036498	405.935	222.362	8.76018	7.713
ASHG19A3A050889	2.21422	1.1468	2.21422	up	noncoding	NR_024334	LOC645431	RefSeq_NR	2026	chr14	-	65877312	65879335		TGAGATACCCAAGTACAAAGCTTTACATTTGCCTAAAAATTCCATTTTTGTCTGGTGTTC	natural antisense	NM_004480	FUT8	"alpha-(1,6)-fucosyltransferase isoform b"	+	65877309	66210839	2011.9	1024.18	11.0641	9.91726
ASHG19A3A050889	2.21422	1.1468	2.21422	up	noncoding	NR_024334	LOC645431	RefSeq_NR	2026	chr14	-	65877312	65879335		TGAGATACCCAAGTACAAAGCTTTACATTTGCCTAAAAATTCCATTTTTGTCTGGTGTTC	natural antisense	NM_178156	FUT8	"alpha-(1,6)-fucosyltransferase isoform a"	+	65877309	66210839	2011.9	1024.18	11.0641	9.91726
ASHG19A3A050889	2.21422	1.1468	2.21422	up	noncoding	NR_024334	LOC645431	RefSeq_NR	2026	chr14	-	65877312	65879335		TGAGATACCCAAGTACAAAGCTTTACATTTGCCTAAAAATTCCATTTTTGTCTGGTGTTC	natural antisense	NM_178155	FUT8	"alpha-(1,6)-fucosyltransferase isoform a"	+	65877309	66210839	2011.9	1024.18	11.0641	9.91726
ASHG19A3A038543	2.1937	1.13337	2.1937	up	noncoding	AK054925		NRED	2782	chr9	+	35862730	35865511	NR_024006,	GCTTAGAGACTAAAAATCATCCTTCAATAAAGCAGCAGAAGTTGCAAAGTTTCCTATGAT	intergenic							251.208	128.281	8.0574	6.92403
ASHG19A3A027912	3.11602	1.63971	3.11602	up	noncoding	ENST00000502001	RP11-480D4.3	Ensembl	1005	chr5	+	8457605	8460776		TGATTGGCCCCAGCTACCCTCGGACCGAGATTCCTATTGGTCCCAGGTGTCGAGCATGCG	intergenic							212.334	76.4379	7.81611	6.1764
ASHG19A3A053217	2.89527	1.5337	2.89527	up	noncoding	CR596660		misc_RNA	1537	chr15	+	89902071	89903608		AAGAATCATCCGAGGCTGCACCGTGACCAGCCCCTCAAGACAGAGCGAGACCCAAATAAC	intergenic							238.368	91.6985	7.97853	6.44483
ASHG19A3A007453	3.03016	1.5994	3.03016	up	noncoding	ENST00000443573	AL139139.2	Ensembl	231	chr1	+	87597768	87598403	NR_026985,	AGCGGCATCATTACAAGGGTGTGGGGTCGCGGCTCCTTTGTCCAGGACTACGCAGGGGCT	intergenic							157.763	58.4689	7.38528	5.78588
ASHG19A3A035682	2.0931	1.06564	2.0931	up	noncoding	AL137475		NRED	5418	chr8	-	35529682	35567838		ATAAAATGAAGACAATGCAAAGGCCTCTCCCATAAGCAAGCCTGGGTACAACGAGCCTAA	intronic antisense	NM_080872	UNC5D	netrin receptor UNC5D precursor	+	35092974	35652181	222.179	118.686	7.87862	6.81298
ASHG19A3A035550	2.19102	1.13161	2.19102	up	noncoding	ENST00000506768	RP11-235P11.1	Ensembl	649	chr8	-	15546422	15547071		AGAAAGGCAAACTACAGGGCAGAAGATTTTGTAAATGACATTGACGAGTCATCCCCCTGC	intronic antisense	NM_006765	TUSC3	tumor suppressor candidate 3 isoform a	+	15397595	15624158	231.455	118.235	7.93914	6.80753
ASHG19A3A035550	2.19102	1.13161	2.19102	up	noncoding	ENST00000506768	RP11-235P11.1	Ensembl	649	chr8	-	15546422	15547071		AGAAAGGCAAACTACAGGGCAGAAGATTTTGTAAATGACATTGACGAGTCATCCCCCTGC	intronic antisense	NM_178234	TUSC3	tumor suppressor candidate 3 isoform b	+	15397595	15624158	231.455	118.235	7.93914	6.80753
ASHG19A3A014779	2.03275	1.02343	2.03275	up	noncoding	AK123493		RNAdb	2175	chr2	-	191825248	191827423		CATTTCTTGCAAGCTAACAGCTGAACCAACAAAACCCAAGCCCTAATTTTAAAAAAGATA	intronic antisense	NM_014905	GLS	"glutaminase kidney isoform, mitochondrial"	+	191745546	191829776	831.942	464.661	9.78904	8.76561
ASHG19A3A042234	2.26773	1.18125	2.26773	up	noncoding	ENST00000400943	RP11-438O11.1	Ensembl	1458	chr1	+	240136086	240137544		ATTCAAACACAGTAACTGATCATATTCCAAGCCCTGCTAAGACAGTGCCAAGACTCCCTG	intergenic							165.903	81.7141	7.45668	6.27543
ASHG19A3A046228	2.11392	1.07992	2.11392	up	noncoding	NR_033314	BDNFOS	RefSeq_NR	1478	chr11	+	27528398	27699348	NR_002832,	TATTGGGGGATACTGAGGTGAGCAGGGTATAAGTGGGGCAAGACTTTTCAGTGTAAACTT	natural antisense	NM_001143811	BDNF	brain-derived neurotrophic factor isoform a	-	27676441	27722600	115.354	61.1297	6.93002	5.8501
ASHG19A3A046228	2.11392	1.07992	2.11392	up	noncoding	NR_033314	BDNFOS	RefSeq_NR	1478	chr11	+	27528398	27699348	NR_002832,	TATTGGGGGATACTGAGGTGAGCAGGGTATAAGTGGGGCAAGACTTTTCAGTGTAAACTT	natural antisense	NM_001143814	BDNF	brain-derived neurotrophic factor isoform a	-	27676441	27722035	115.354	61.1297	6.93002	5.8501
ASHG19A3A046228	2.11392	1.07992	2.11392	up	noncoding	NR_033314	BDNFOS	RefSeq_NR	1478	chr11	+	27528398	27699348	NR_002832,	TATTGGGGGATACTGAGGTGAGCAGGGTATAAGTGGGGCAAGACTTTTCAGTGTAAACTT	natural antisense	NM_001143807	BDNF	brain-derived neurotrophic factor isoform a	-	27676441	27741294	115.354	61.1297	6.93002	5.8501
ASHG19A3A046228	2.11392	1.07992	2.11392	up	noncoding	NR_033314	BDNFOS	RefSeq_NR	1478	chr11	+	27528398	27699348	NR_002832,	TATTGGGGGATACTGAGGTGAGCAGGGTATAAGTGGGGCAAGACTTTTCAGTGTAAACTT	natural antisense	NM_170735	BDNF	brain-derived neurotrophic factor isoform a	-	27676441	27681196	115.354	61.1297	6.93002	5.8501
ASHG19A3A046228	2.11392	1.07992	2.11392	up	noncoding	NR_033314	BDNFOS	RefSeq_NR	1478	chr11	+	27528398	27699348	NR_002832,	TATTGGGGGATACTGAGGTGAGCAGGGTATAAGTGGGGCAAGACTTTTCAGTGTAAACTT	natural antisense	NM_170732	BDNF	brain-derived neurotrophic factor isoform a	-	27676441	27742326	115.354	61.1297	6.93002	5.8501
ASHG19A3A046228	2.11392	1.07992	2.11392	up	noncoding	NR_033314	BDNFOS	RefSeq_NR	1478	chr11	+	27528398	27699348	NR_002832,	TATTGGGGGATACTGAGGTGAGCAGGGTATAAGTGGGGCAAGACTTTTCAGTGTAAACTT	natural antisense	NM_001143813	BDNF	brain-derived neurotrophic factor isoform a	-	27676441	27722035	115.354	61.1297	6.93002	5.8501
ASHG19A3A046228	2.11392	1.07992	2.11392	up	noncoding	NR_033314	BDNFOS	RefSeq_NR	1478	chr11	+	27528398	27699348	NR_002832,	TATTGGGGGATACTGAGGTGAGCAGGGTATAAGTGGGGCAAGACTTTTCAGTGTAAACTT	natural antisense	NM_001143810	BDNF	brain-derived neurotrophic factor isoform e	-	27676441	27722600	115.354	61.1297	6.93002	5.8501
ASHG19A3A046228	2.11392	1.07992	2.11392	up	noncoding	NR_033314	BDNFOS	RefSeq_NR	1478	chr11	+	27528398	27699348	NR_002832,	TATTGGGGGATACTGAGGTGAGCAGGGTATAAGTGGGGCAAGACTTTTCAGTGTAAACTT	natural antisense	NM_170733	BDNF	brain-derived neurotrophic factor isoform a	-	27676441	27723180	115.354	61.1297	6.93002	5.8501
ASHG19A3A046228	2.11392	1.07992	2.11392	up	noncoding	NR_033314	BDNFOS	RefSeq_NR	1478	chr11	+	27528398	27699348	NR_002832,	TATTGGGGGATACTGAGGTGAGCAGGGTATAAGTGGGGCAAGACTTTTCAGTGTAAACTT	natural antisense	NM_001143816	BDNF	brain-derived neurotrophic factor isoform a	-	27676441	27681196	115.354	61.1297	6.93002	5.8501
ASHG19A3A046228	2.11392	1.07992	2.11392	up	noncoding	NR_033314	BDNFOS	RefSeq_NR	1478	chr11	+	27528398	27699348	NR_002832,	TATTGGGGGATACTGAGGTGAGCAGGGTATAAGTGGGGCAAGACTTTTCAGTGTAAACTT	natural antisense	NM_001143806	BDNF	brain-derived neurotrophic factor isoform a	-	27676441	27742326	115.354	61.1297	6.93002	5.8501
ASHG19A3A046228	2.11392	1.07992	2.11392	up	noncoding	NR_033314	BDNFOS	RefSeq_NR	1478	chr11	+	27528398	27699348	NR_002832,	TATTGGGGGATACTGAGGTGAGCAGGGTATAAGTGGGGCAAGACTTTTCAGTGTAAACTT	natural antisense	NM_170734	BDNF	brain-derived neurotrophic factor isoform c	-	27676441	27721214	115.354	61.1297	6.93002	5.8501
ASHG19A3A046228	2.11392	1.07992	2.11392	up	noncoding	NR_033314	BDNFOS	RefSeq_NR	1478	chr11	+	27528398	27699348	NR_002832,	TATTGGGGGATACTGAGGTGAGCAGGGTATAAGTGGGGCAAGACTTTTCAGTGTAAACTT	natural antisense	NM_001143809	BDNF	brain-derived neurotrophic factor isoform d	-	27676441	27722600	115.354	61.1297	6.93002	5.8501
ASHG19A3A046228	2.11392	1.07992	2.11392	up	noncoding	NR_033314	BDNFOS	RefSeq_NR	1478	chr11	+	27528398	27699348	NR_002832,	TATTGGGGGATACTGAGGTGAGCAGGGTATAAGTGGGGCAAGACTTTTCAGTGTAAACTT	natural antisense	NM_170731	BDNF	brain-derived neurotrophic factor isoform b	-	27676441	27743605	115.354	61.1297	6.93002	5.8501
ASHG19A3A046228	2.11392	1.07992	2.11392	up	noncoding	NR_033314	BDNFOS	RefSeq_NR	1478	chr11	+	27528398	27699348	NR_002832,	TATTGGGGGATACTGAGGTGAGCAGGGTATAAGTGGGGCAAGACTTTTCAGTGTAAACTT	natural antisense	NM_001709	BDNF	brain-derived neurotrophic factor isoform a	-	27676441	27722035	115.354	61.1297	6.93002	5.8501
ASHG19A3A046228	2.11392	1.07992	2.11392	up	noncoding	NR_033314	BDNFOS	RefSeq_NR	1478	chr11	+	27528398	27699348	NR_002832,	TATTGGGGGATACTGAGGTGAGCAGGGTATAAGTGGGGCAAGACTTTTCAGTGTAAACTT	bidirectional	NM_018362	LIN7C	protein lin-7 homolog C	-	27515964	27528326	115.354	61.1297	6.93002	5.8501
ASHG19A3A046228	2.11392	1.07992	2.11392	up	noncoding	NR_033314	BDNFOS	RefSeq_NR	1478	chr11	+	27528398	27699348	NR_002832,	TATTGGGGGATACTGAGGTGAGCAGGGTATAAGTGGGGCAAGACTTTTCAGTGTAAACTT	natural antisense	NM_001143808	BDNF	brain-derived neurotrophic factor isoform a	-	27676441	27722600	115.354	61.1297	6.93002	5.8501
ASHG19A3A046228	2.11392	1.07992	2.11392	up	noncoding	NR_033314	BDNFOS	RefSeq_NR	1478	chr11	+	27528398	27699348	NR_002832,	TATTGGGGGATACTGAGGTGAGCAGGGTATAAGTGGGGCAAGACTTTTCAGTGTAAACTT	natural antisense	NM_001143812	BDNF	brain-derived neurotrophic factor isoform a	-	27676441	27722447	115.354	61.1297	6.93002	5.8501
ASHG19A3A046228	2.11392	1.07992	2.11392	up	noncoding	NR_033314	BDNFOS	RefSeq_NR	1478	chr11	+	27528398	27699348	NR_002832,	TATTGGGGGATACTGAGGTGAGCAGGGTATAAGTGGGGCAAGACTTTTCAGTGTAAACTT	natural antisense	NM_001143805	BDNF	brain-derived neurotrophic factor isoform a	-	27676441	27742326	115.354	61.1297	6.93002	5.8501
ASHG19A3A010154	2.02929	1.02098	2.02929	up	noncoding	AK024867		NRED	4413	chr1	-	204626980	204631521		TCTAAAAATACTGGTAGTTGGACAAGTGATGATATTTGGGAGACCCCCTTCCTCTCAGTT	intron sense-overlapping	NM_006338	LRRN2	leucine-rich repeat neuronal protein 2	-	204586302	204654481	474.065	264.036	8.98317	7.96219
ASHG19A3A010154	2.02929	1.02098	2.02929	up	noncoding	AK024867		NRED	4413	chr1	-	204626980	204631521		TCTAAAAATACTGGTAGTTGGACAAGTGATGATATTTGGGAGACCCCCTTCCTCTCAGTT	intron sense-overlapping	NM_201630	LRRN2	leucine-rich repeat neuronal protein 2	-	204586302	204654597	474.065	264.036	8.98317	7.96219
ASHG19A3L0001163	2.08329	1.05886	2.08329	up	noncoding	chr2:235518511-235598161-	lincRNA-ARL4C-6	lincRNA	79651	chr2	-	235518511	235598161		AACATACAGGCAGCCAAACTTATTCAGGCCTCACTCCCGTTTCAATTACACTGTTGTTGA	intergenic							295.853	159.602	8.29631	7.23744
ASHG19A3A033553	2.43328	1.2829	2.43328	up	noncoding	AK129699		misc_RNA	1999	chr7	-	130614967	130616965		CCACCTGCCAAACAGTTAACCCTGAACAAGTCATGTCAATTTATTTTGCTTTTAAAAAAG	intergenic							503.379	234.668	9.0721	7.7892
ASHG19A3A016327	2.03826	1.02734	2.03826	up	noncoding	ENST00000450840	AC079776.3	Ensembl	2398	chr2	+	130680749	130704276		CGACCACTACATGCAACATTATGGATGAAAATACAATTGCGGAAAGACATTTTCTCAAAA	intergenic							100.298	54.9873	6.72194	5.69459
ASHG19A3A049382	3.9248	1.97262	3.9248	up	noncoding	uc001usr.2	CR592782	UCSC_knowngene	2567	chr13	-	30677365	30683005		TTGGAATGCATCCTCCACTTTAGCAAAAGAATTATGTGTTTTGTTTGCTCTTCATCATGT	intergenic							492.951	142.631	9.04354	7.07092
ASHG19A3A008477	2.22653	1.1548	2.22653	up	noncoding	uc010wkm.1	CR624169	UCSC_knowngene	416	chr17	-	45128651	45129168	ENST00000514828,ENST00000510581,ENST00000508811,	ATGCCAAGATGAGTTTGTCAGTATAGCCATATCCTGGAACTTATTTTGTGAGCTAAAAAA	intergenic							3102.74	1556.86	11.6731	10.5183
ASHG19A3L0003307	3.87587	1.95452	3.87587	up	noncoding	chr2:238206264-238224402+	lincRNA-COL6A3-4	lincRNA	18139	chr2	+	238206264	238224402		AATAAGTACAGGGATTTGAGCCGATTGTTCCATTGCATTCCGGTCGTCTCAGGAAAAGAG	intergenic							1428.9	419.119	10.5686	8.61409
CUST_264_PI426073487	5.11364	2.35435	5.11364	up	noncoding	uc.266+	uc.266	UCR	243	chr9	+	109378291	109378534	uc004bcy.1,	TTCTGCATGAAACATCTGCATCAAGGCTCTCTTTGATGTATTCCACTTGGCTCTGTCTAC	intergenic							294.134	64.5518	8.28812	5.93377
ASHG19A3A009770	2.64812	1.40497	2.64812	up	noncoding	NR_002307	MSX2P1	RefSeq_NR	2162	chr17	+	56234319	56236478		GTATGCCTTTACCCCTTTGAAAGGGTGCCTTGTACAATTGTATATATTTTATTGAAGAGT	intergenic							1237.49	530.832	10.3614	8.95644
ASHG19A3A016748	10.8458	3.43906	10.8458	up	noncoding	ENST00000413290	AC064834.1	Ensembl	989	chr2	+	196313255	196343649		GGACTTGGAAAGGCAGAAGAGAAGCAAGAGCCAGCATCCTCATCTTATAAACAGAAAAGC	intergenic							581.076	60.4769	9.27414	5.83508
ASHG19A3A017999	2.78026	1.47522	2.78026	up	noncoding	uc002wjr.2	BC042140	UCSC_knowngene	705	chr20	+	3789140	3793080		TTCAGTAGAAGATTTCAGTAGAGGCTGAAATCTACTGATATGTACACCTCCAAGGACACA	intergenic							133.403	53.8311	7.14097	5.66575
ASHG19A3A045606	2.26034	1.17654	2.26034	up	noncoding	uc001pfj.2	CR603982	UCSC_knowngene	5264	chr11	-	94898705	94903969		GGAACTGTTAGTGAGTCAAGACAAACACATCTGAAATAAAGGAACTGTGTATTAACATGT	intergenic							6482.02	3208.24	12.7405	11.564
ASHG19A3A014229	2.46401	1.30101	2.46401	up	noncoding	uc002tjx.3	AY343891	UCSC_knowngene	536	chr2	-	114297629	114300242	NR_015423,ENST00000420855,ENST00000416700,AK098218,	AACCACTGAAGCCGTCAGTTGAAACCTGCTGGGACTTTTTAGCCATTCTCTTCAACATAA	intergenic							126.879	57.9448	7.07223	5.77122
ASHG19A3A051623	2.10381	1.07301	2.10381	up	noncoding	uc001xrp.2	BC038216	UCSC_knowngene	376	chr14	+	75761216	75763109		CCAGCAAGGGAGTTTTTCTGTATTCACTTTGGTGGAAATAGCAAAACTTGACAGAAAAAA	intergenic							153.758	81.7279	7.34858	6.27558
ASHG19A3L0001891	2.45866	1.29787	2.45866	up	noncoding	DB061937	lincRNA-SHH-4	lincRNA	564	chr7	-	155855748	155856312		GGGACTCCTGATAAAGACAGCAGCCTGTCTGGAGAGACCCGTCTCACGCTCTCACTTTTT	intergenic							134.471	61.3019	7.15233	5.85446
ASHG19A3A025365	2.22466	1.15358	2.22466	up	noncoding	ENST00000506450	RP11-302F12.2	Ensembl	503	chr4	+	25624398	25625223		ATACCAAAACTGACTTTACTGGAGGAAGCCCAGATACCCAAAGAGAACCAGTGGTGTGAA	intergenic							5112.17	2587.37	12.4009	11.2473
ASHG19A3L0000783	2.72729	1.44747	2.72729	up	noncoding	CD365395	lincRNA-FLRT2-3	lincRNA	757	chr14	-	86450289	86596122		AAAGCACAATCTCCACTTGCAAAATGATGATCCAAAAAAGAGATGATGGTCAAAAATCTG	intergenic							155.599	63.8946	7.36652	5.91905
ASHG19A3A024446	2.24955	1.16963	2.24955	up	noncoding	ENST00000430398	KRT8P21	Ensembl	1486	chr1	+	73570474	73571960		ATCGAGAAGGATGTGGATGAAGCTTACACGAACAAAGTGGAGATAGAGTCTCACCTGGAA	intergenic							129.442	64.413	7.10017	5.93053
CUST_683_PI426073487	2.15137	1.10526	2.15137	up	noncoding	uc.204-	uc.204	UCR	202	chr7	-	1265903	1266105		TAGAGAGTAAATCTAGGATCCTTTCCCTCCGCAGTTCAGACACTAATTAACTAACCAAGA	intergenic							286.129	149.461	8.24725	7.14199
ASHG19A3A027662	3.0002	1.58506	3.0002	up	noncoding	ENST00000458002	RP11-541P9.3	Ensembl	448	chr5	-	162439270	162864299		GTTTGTTCTGTGGGGTTTAGGAGTTCTACAGTGGTTCTGCCCCATCTTTCTAAAAATACA	bidirectional	NM_199246	CCNG1	cyclin-G1	+	162864576	162872022	190.593	70.9955	7.65578	6.07072
ASHG19A3A027662	3.0002	1.58506	3.0002	up	noncoding	ENST00000458002	RP11-541P9.3	Ensembl	448	chr5	-	162439270	162864299		GTTTGTTCTGTGGGGTTTAGGAGTTCTACAGTGGTTCTGCCCCATCTTTCTAAAAATACA	bidirectional	NM_004060	CCNG1	cyclin-G1	+	162864576	162872022	190.593	70.9955	7.65578	6.07072
ASHG19A3A052723	4.99489	2.32045	4.99489	up	noncoding	uc001zgs.1	BC037839	UCSC_knowngene	1279	chr15	+	32828914	32872810		AATCACCGTGTGTTACTGGCACAGATGCATCGGCTAGTGAAGAAAGAAGACATTCAAACT	intergenic							446.585	100.436	8.90159	6.58114
ASHG19A3L0000209	2.01944	1.01396	2.01944	up	noncoding	AK097728	lincRNA-PRLHR-1	lincRNA	1798	chr10	-	120433633	120514558	NM_153810,	CTCAGGAGCTCTGTCACAAAGCTGTTCATGGAAGAGGATGTTGGACTTCTTACTTGCTTT	exon sense-overlapping	NM_153810	C10orf46	chromosome 10 open reading frame 46	-	120440493	120514758	3167.34	1746.67	11.7023	10.6884
ASHG19A3A014449	3.35813	1.74766	3.35813	up	noncoding	AF086434		misc_RNA	662	chr2	-	144702501	144703153		GCTTCATAGTGGCTAAGATACTCCACACACAACTAGTACCCATAGATCTTTTCTCACTGA	intergenic							219.84	73.3708	7.86536	6.1177
ASHG19A3A053140	2.61104	1.38462	2.61104	up	noncoding	AL109713		misc_RNA	561	chr15	+	79705699	79706227		AGTGGCAGGTCTGATTTGGTTATAGAACTGGATACATCAGACAGTTTTAACTTTATGCTA	intergenic							179.149	76.9821	7.5711	6.18648
ASHG19A3A018598	2.21595	1.14792	2.21595	up	noncoding	NR_027687	NCRNA00176	RefSeq_NR	5234	chr20	+	62665696	62671314		GCCGCGCGTCCCGGGGCTCCACGGCCCTAGGCTGAAGTCGGGCTGGGTCGCGTCTCCCTT	intergenic							133.307	67.2952	7.14004	5.99212
ASHG19A3A012020	2.29751	1.20007	2.29751	up	noncoding	ENST00000452067	CTD-2090I13.2	Ensembl	703	chr1	-	227598317	227599020		AAGAACAAGAAGAGGATGAGACACCCTTCCAGGAGAATTCCAGCAGCAATGAAGATTTCC	intergenic							278.605	136.367	8.2088	7.00873
ASHG19A3L0002908	2.26492	1.17946	2.26492	up	noncoding	AA628127	lincRNA-PRDM14	lincRNA	354	chr8	+	70946291	70947002		GAAAAACGTTATTTTAAATATACGGAATTTGCTCCTCTCCAAATCCACTCTCCCTTTCGC	intergenic							820.129	411.316	9.76904	8.58958
ASHG19A3A034172	2.05246	1.03735	2.05246	up	noncoding	ENST00000434504	AC083863.7	Ensembl	538	chr7	+	33055670	33056504		ATGTCAGTTCTAACTCACTTCTTTTTCCAACTATGAATGTTAAGGCTTCAAAGTTGCTGC	intronic antisense	NM_001002010	NT5C3	cytosolic 5'-nucleotidase 3 isoform 1	-	33053741	33102409	137.979	75.2049	7.19096	6.15361
ASHG19A3A034172	2.05246	1.03735	2.05246	up	noncoding	ENST00000434504	AC083863.7	Ensembl	538	chr7	+	33055670	33056504		ATGTCAGTTCTAACTCACTTCTTTTTCCAACTATGAATGTTAAGGCTTCAAAGTTGCTGC	intronic antisense	NM_016489	NT5C3	cytosolic 5'-nucleotidase 3 isoform 2	-	33053741	33080522	137.979	75.2049	7.19096	6.15361
ASHG19A3A034172	2.05246	1.03735	2.05246	up	noncoding	ENST00000434504	AC083863.7	Ensembl	538	chr7	+	33055670	33056504		ATGTCAGTTCTAACTCACTTCTTTTTCCAACTATGAATGTTAAGGCTTCAAAGTTGCTGC	intronic antisense	NM_001166118	NT5C3	cytosolic 5'-nucleotidase 3 isoform 3	-	33053741	33080521	137.979	75.2049	7.19096	6.15361
ASHG19A3A048871	2.57239	1.36311	2.57239	up	noncoding	AF086474		misc_RNA	501	chr12	+	76965096	76965587		TTGGCAGCCCTTACCAATTGGCAACTTCTTTGTCTCTTGGTTTGCTTTTGGGCAAAAATT	intergenic							314.859	138.214	8.39015	7.02704
ASHG19A3A009264	4.09309	2.03319	4.09309	up	noncoding	uc002gyd.1	CR620692	UCSC_knowngene	1529	chr17	+	20691383	20692912		TCTCCAAAAAATTGAATGAATCCATTGGAGAAGCAGTGGATTAACTAGCCAGACAAAATT	intergenic							20960.5	5729.39	14.4367	12.4035
ASHG19A3A007937	3.07675	1.62141	3.07675	up	noncoding	BC034700		misc_RNA	1723	chr1	-	172500900	172502606		AGTTCCACTTATCTGCTGATGCCACTCTTAGTATATGACAATAAAATCCTTTCATCTGTC	natural antisense	NM_014283	C1orf9	protein osteopotentia homolog isoform 1	+	172502259	172580973	525.021	193.243	9.13187	7.51046
ASHG19A3A007937	3.07675	1.62141	3.07675	up	noncoding	BC034700		misc_RNA	1723	chr1	-	172500900	172502606		AGTTCCACTTATCTGCTGATGCCACTCTTAGTATATGACAATAAAATCCTTTCATCTGTC	natural antisense	NM_016227	C1orf9	protein osteopotentia homolog isoform 2	+	172502316	172580973	525.021	193.243	9.13187	7.51046
ASHG19A3A028322	2.64759	1.40468	2.64759	up	noncoding	ENST00000458353	RP11-426L16.7	Ensembl	381	chr1	+	113290716	113291097		TTCCTATTAAAGAACATCAACGATGGCTTTTGCGCCAATGACATGTTCAGGTTTGCCCTG	intergenic							262.442	110.76	8.12116	6.71648
ASHG19A3H0000207	2.21718	1.14872	2.21718	up	noncoding	nc-HOXC9-133-	nc-HOXC9-133	HOX cluster	108	chr12	+	54387975	54388083		GAAGAAGACGGCGGCAGCGGGGACTGGGGGCTTCGGGTGGGAACGCCAGGGCTCAGGGCT	intergenic							173.663	87.6586	7.52401	6.37528
ASHG19A3A051810	2.75138	1.46015	2.75138	up	noncoding	ENST00000499705	AL356356.3	Ensembl	1992	chr1	-	150583858	150587960		GACTCTGGCAGTGGTGAGTAGCAATTCTTGCTAGGACCTGCATTTTTCTTCCTCTTAATT	intergenic							689.035	282.108	9.51606	8.0559
ASHG19A3A018941	2.6088	1.38339	2.6088	up	noncoding	ENST00000424933	AP001631.9	Ensembl	422	chr21	-	44560632	44561202		CTCATCTCCAGACCTGGAGCAGCTGCCTGCCCCAGGGCAGAAGCCACTGCCCGCAGCTAG	intergenic							174.88	74.9986	7.53374	6.15035
ASHG19A3A009263	2.90342	1.53775	2.90342	up	noncoding	ENST00000455244	SCDP1	Ensembl	1083	chr17	+	20687957	20689040	NM_005063,	AGATATCGTCCTTATGACAAGAACATTAGCCTCCGGGAGAATATCCTGGTTTCACTTGGA	intergenic							874.932	340.161	9.85752	8.31977
ASHG19A3A020718	2.31822	1.21302	2.31822	up	noncoding	AK094210		RNAdb	1936	chr3	-	12190146	12192082		TCTCCAAAAACCCAGAAAGACTCACGGAATTTCAGATAGACTGGCAGCAATAAACGGTGG	intronic antisense	NM_003178	SYN2	synapsin-2 isoform IIb	+	12045861	12227226	174.843	84.395	7.53331	6.32029
ASHG19A3A020718	2.31822	1.21302	2.31822	up	noncoding	AK094210		RNAdb	1936	chr3	-	12190146	12192082		TCTCCAAAAACCCAGAAAGACTCACGGAATTTCAGATAGACTGGCAGCAATAAACGGTGG	intronic antisense	NM_133625	SYN2	synapsin-2 isoform IIa	+	12045861	12233532	174.843	84.395	7.53331	6.32029
ASHG19A3A035931	7.96281	2.99328	7.96281	up	noncoding	uc010mak.1	DKFZp761D112	UCSC_knowngene	2547	chr8	-	89044243	89046790		CCTAGGGAAGGGTTAAATGGCTTTTTATACTATTGCATCTTCTGTATTTACCATCAATTC	intergenic							8907.37	1252.73	13.1965	10.2032
ASHG19A3A040460	2.13606	1.09495	2.13606	up	noncoding	ENST00000439143	RP11-308D16.1	Ensembl	386	chrX	-	136029906	136030292		CATAGTTGCTAACAGCAGAGAGTCAGGAATTACATTACTCCCAAATTAACCAGGATGCAG	intergenic							154.332	80.8933	7.35392	6.25897
ASHG19A3L0002666	2.18473	1.12746	2.18473	up	noncoding	DB462076	lincRNA-NMBR-4	lincRNA	481	chr6	-	142399786	142468245	NM_002511,	GATGAATTACATCCAAAGATTCATTCAGTGCTCATTTTCTTGGTCTATTTCCTCATACCA	exon sense-overlapping	NM_002511	NMBR	neuromedin-B receptor	-	142396744	142409936	214.351	109.521	7.82942	6.70196
ASHG19A3L0002666	2.18473	1.12746	2.18473	up	noncoding	DB462076	lincRNA-NMBR-4	lincRNA	481	chr6	-	142399786	142468245	NM_002511,	GATGAATTACATCCAAAGATTCATTCAGTGCTCATTTTCTTGGTCTATTTCCTCATACCA	bidirectional	NM_016485	VTA1	vacuolar protein sorting-associated protein VTA1	+	142468409	142542085	214.351	109.521	7.82942	6.70196
ASHG19A3A007422	2.05402	1.03845	2.05402	up	noncoding	NR_026838	DSCR8	RefSeq_NR	825	chr21	+	39493544	39528604		ATGGTTAAATTAAAAAAAAAAAAGAGCACGgctggagtgcagtggttcaatcacggatca	bidirectional	NM_005867	DSCR4	Down syndrome critical region protein 4	-	39426312	39493454	628.657	347.273	9.38561	8.34716
ASHG19A3A049079	2.0147	1.01056	2.0147	up	noncoding	NR_027345	NCRNA00173	RefSeq_NR	1597	chr12	+	116971226	116973326		TTATGTCCTGTGTAGCAGCAGGTAGTGTGGCTTTGAGAAAATAAAATGGCCACCTTGCTC	intergenic							1590.82	891.025	10.7208	9.71021
ASHG19A3A013945	2.67193	1.41788	2.67193	up	noncoding	ENST00000503254	AL669831.1	Ensembl	1509	chr1	+	465693	688071		AGGACACAACCACAGCACAAGAAAAACATGTGATAATTAAGTTTACACATGTGTGTTACT	intronic antisense	NM_001005277	OR4F16	olfactory receptor 4F3/4F16/4F29	-	621095	622034	703.915	297.113	9.54811	8.13023
ASHG19A3A013945	2.67193	1.41788	2.67193	up	noncoding	ENST00000503254	AL669831.1	Ensembl	1509	chr1	+	465693	688071		AGGACACAACCACAGCACAAGAAAAACATGTGATAATTAAGTTTACACATGTGTGTTACT	intronic antisense	NM_001005224	OR4F3	olfactory receptor 4F3/4F16/4F29	-	621095	622034	703.915	297.113	9.54811	8.13023
ASHG19A3A013945	2.67193	1.41788	2.67193	up	noncoding	ENST00000503254	AL669831.1	Ensembl	1509	chr1	+	465693	688071		AGGACACAACCACAGCACAAGAAAAACATGTGATAATTAAGTTTACACATGTGTGTTACT	intronic antisense	NM_001005221	OR4F29	olfactory receptor 4F3/4F16/4F29	-	621095	622034	703.915	297.113	9.54811	8.13023
ASHG19A3A021323	2.42495	1.27795	2.42495	up	noncoding	ENST00000478252	RP13-503K1.1	Ensembl	1264	chr3	-	93794755	93796019		CAGAGAACATTTATAATGATGAAGACCCTGAAGGAATATGGATCCAGAAGGACAAGGGTC	intronic antisense	NM_022072	NSUN3	putative methyltransferase NSUN3	+	93781854	93845630	210.74	96.7693	7.80426	6.52631
ASHG19A3A036636	4.98046	2.31628	4.98046	up	noncoding	AK021798		NRED	1799	chr8	+	59010100	59011913		GATTTCTTAGTTGAAAACTGGTGTAATACCTCAAGGGATGTAGACAAATACTCAAGGTTA	intron sense-overlapping	NM_147189	FAM110B	hypothetical protein LOC90362	+	58907112	59062277	266.047	60.0226	8.14122	5.82495
ASHG19A3A053683	2.43092	1.28151	2.43092	up	noncoding	NR_024348	NCRNA00095	RefSeq_NR	3951	chr16	-	30930639	30934590		TCCAGCTTCTCTTGAAAAGTCCTGAAATCTAGTCCAGGACCGTGGATTGTATTTAAAAAA	intergenic							695.935	323.422	9.53157	8.25007
ASHG19A3A051006	2.87929	1.52571	2.87929	up	noncoding	uc001elu.1	AX747132	UCSC_knowngene	896	chr1	-	144833912	144834808		CCTATATATTGAAGACTACCAAGTACTGCTTAGAGCAGTTAAAGACCTTTGGAATAGAAA	intergenic							521.693	205.188	9.12238	7.59667
CUST_252_PI426073487	3.71587	1.8937	3.71587	up	noncoding	uc.254+	uc.254	UCR	279	chr9	+	23496724	23497003		ATTGAAGCCTCTGAACAAAGAAAATCATTTCCATTCCATCACTATGGTTACACTTTCTTC	intergenic							1201.53	365.484	10.3175	8.4238
ASHG19A3A035154	2.48326	1.31224	2.48326	up	noncoding	AK098800		misc_RNA	1431	chr7	+	138730647	138732074		CTGCAATTACAGAAAATTTAGAAATCAGCCTTTACCAGTTACATCTGAGACAAGGTAAAC	natural antisense	NM_020119	ZC3HAV1	zinc finger CCCH-type antiviral protein 1	-	138728265	138794465	1219.68	559	10.3407	9.0285
ASHG19A3A015144	2.02278	1.01634	2.02278	up	noncoding	uc002vvo.1	AF279775	UCSC_knowngene	723	chr2	-	235791851	235797446		GAAAGTGTTGAAAATTGACATCTATGTTTACATATCACAGCAACACAAAGTGCCAGCAAA	intergenic							128.212	71.0052	7.08755	6.07121
ASHG19A3A022647	2.27696	1.18711	2.27696	up	noncoding	AF074992		misc_RNA	512	chr3	+	50625965	50626476		CCCAGAACTTTGGAGCTCATTCTTTCAAAGTACATTTCATGTGCAACTGAAATACATATT	intergenic							494.912	246.958	9.05021	7.8631
ASHG19A3A026765	2.4062	1.26676	2.4062	up	noncoding	ENST00000505706	RP11-473L15.3	Ensembl	584	chr5	-	44495719	44510342		TTAGCAACCTCAAAAACTCTGGAAAAGGCTTCATTTTCTCCAGTCTCCTGGGAGAGGAGA	intergenic							141.627	65.7068	7.2261	5.95934
ASHG19A3A034488	3.18257	1.67019	3.18257	up	noncoding	ENST00000423746	RP11-458F8.2	Ensembl	351	chr7	+	66345694	66347968		ATTTTCTACTTGCCTCCTGGAATGGCTAACAAAATAAACACTAAAGGTAGAAGATTACCT	intergenic							353.154	124.844	8.55541	6.88522
ASHG19A3A016486	2.07581	1.05367	2.07581	up	noncoding	AK026384		misc_RNA	1486	chr2	+	155713374	155714864		TCCACACATGCGTGGGAAAGGTATGATTTCTGCATGTAATTGCAGTTTAACCCTTATTTC	intergenic							1681.44	913.831	10.8011	9.74745
ASHG19A3A050469	6.02012	2.58979	6.02012	up	noncoding	ENST00000455487	RP11-54H7.2	Ensembl	698	chr13	+	109934320	109940081		TAAAAGGAAGCAACTCTGGAGAACAGAATGAGAAATCAGAAAGCAAGGCCCTGTCCTCTG	intergenic							300.798	56.4228	8.32288	5.73309
ASHG19A3A020575	2.07194	1.05098	2.07194	up	noncoding	AK027101		RNAdb	1299	chr22	+	46638411	46639653	NM_001001928,	CCTACTGTAAGACTGATGAATGTACAGAGTTAATTTCAGGGTACAGTTTTGCCTTAATGG	exon sense-overlapping	NM_001001928	PPARA	peroxisome proliferator-activated receptor	+	46546498	46639653	2472.54	1347.09	11.3587	10.3077
ASHG19A3A020575	2.07194	1.05098	2.07194	up	noncoding	AK027101		RNAdb	1299	chr22	+	46638411	46639653	NM_001001928,	CCTACTGTAAGACTGATGAATGTACAGAGTTAATTTCAGGGTACAGTTTTGCCTTAATGG	exon sense-overlapping	NM_005036	PPARA	peroxisome proliferator-activated receptor	+	46546498	46639653	2472.54	1347.09	11.3587	10.3077
ASHG19A3A025603	3.10421	1.63423	3.10421	up	noncoding	ENST00000294916	RP11-4I17.1	Ensembl	186	chr4	+	69242040	69242226	NM_005953,NM_005952,NM_005950,	AAATGCACCTCCTGCAAGAAAAGCTGCTGCTCCTGCTGTCCTGTGGGCTGTGCCAAGTGT	intergenic							45533	15807.2	15.5118	13.8775
ASHG19A3A017844	2.42187	1.27612	2.42187	up	noncoding	NR_003505	PPP4R1L	RefSeq_NR	2398	chr20	-	56807832	56884495		TTGAAGACTATGGTACAGATTGCGACAACATGAGAGTAACGGCCTTCTTGGACATTCCAG	bidirectional	NM_020673	RAB22A	ras-related protein Rab-22A	+	56884770	56942563	146.883	67.8586	7.28102	6.0049
ASHG19A3A055302	2.01377	1.0099	2.01377	up	noncoding	uc010oxw.1	AF161426	UCSC_knowngene	477	chr1	+	144175658	144212182	uc001ekp.3,NM_001039703,	AAGACCAAGACCCATCATGCCCCAGGCTCAGCAGGGAGCTGCTGGAGGTAGTAGAGCCTG	intergenic							3670.91	2049.16	11.9205	10.9106
ASHG19A3A033029	3.56943	1.83569	3.56943	up	noncoding	ENST00000442338	AC006014.5	Ensembl	1069	chr7	-	74973233	74988765	uc003uui.2,NR_003613,ENST00000506558,ENST00000423426,	TGACAGAGCCACTAGGCGAAAAGGAGAGACGGGAAGTATTTTTTCCGCCCCGCCCGGAAA	natural antisense	NM_018991	STAG3L1	STAG3-like protein 1 isoform 1	+	74988446	74996990	255.969	80.3503	8.08474	6.24905
ASHG19A3A033029	3.56943	1.83569	3.56943	up	noncoding	ENST00000442338	AC006014.5	Ensembl	1069	chr7	-	74973233	74988765	uc003uui.2,NR_003613,ENST00000506558,ENST00000423426,	TGACAGAGCCACTAGGCGAAAAGGAGAGACGGGAAGTATTTTTTCCGCCCCGCCCGGAAA	natural antisense	NM_001002840	STAG3L1	STAG3-like protein 1 isoform 2	+	74988446	74996990	255.969	80.3503	8.08474	6.24905
ASHG19A3A038816	2.15429	1.10721	2.15429	up	noncoding	ENST00000448540	RP11-111E2.1	Ensembl	384	chr9	+	80195160	80195544		TAAAGAATATCAGTGAAGCTTGGGTTTGCACCAATGACATGTTCAGGCTTGCCCTGCTCA	intronic antisense	NM_004297	GNA14	guanine nucleotide-binding protein subunit	-	80037994	80263232	2706.38	1416.07	11.4867	10.3795
ASHG19A3L0000671	2.41945	1.27468	2.41945	up	noncoding	chr13:73819474-73846199+	lincRNA-KLF12-10	lincRNA	26726	chr13	+	73819474	73846199		AAGCCATCCCAAAATATCTCCTTTAGGCTTTAGACAGTCCTAGCTTTCCTATTACTTTGG	intergenic							243.416	112.19	8.01024	6.73556
ASHG19A3A038021	2.27448	1.18554	2.27448	up	noncoding	ENST00000453529	RP11-85O21.2	Ensembl	589	chr9	-	126769953	126771516		AAAGAGGCGAGAACGTCTCCCTAACCTTGAAGCAGAAAGGACTGTGTTCTTAAAGCTGTT	intergenic							223.971	109.688	7.88952	6.70398
ASHG19A3A025735	3.46763	1.79395	3.46763	up	noncoding	ENST00000512502	RP11-100N20.1	Ensembl	782	chr4	+	82086093	82114549		AACTAAGTAGGTGAATCTGAAGTCTGCGCTGCTTCCATTCCATCCCATTGTCTCTTCTGA	intronic antisense	NM_006259	PRKG2	cGMP-dependent protein kinase 2	-	82009836	82126215	1389.52	453.143	10.5257	8.73178
ASHG19A3A048079	2.12093	1.0847	2.12093	up	noncoding	NR_024246	LOC144742	RefSeq_NR	2291	chr12	-	119721629	119741185		TTTCTACTCCTTTCAGGTGGGATGCTTCTAAGACACCTCCATTCCAGTTTCTGCACATCT	intergenic							278.244	147.598	8.20703	7.12233
ASHG19A3L0001458	8.85308	3.14618	8.85308	up	noncoding	AK021484	lincRNA-SYNPO2	lincRNA	3422	chr4	+	119672345	119956974	NM_001128933,	TGAGAATTATCACATAGCCTAAATTCTAGCCTGGCAGCAAGAGTCACATCTGAGATGTCC	intron sense-overlapping	NM_001128934	SYNPO2	synaptopodin-2 isoform c	+	119809995	119959669	12505.6	1573.77	13.6802	10.534
ASHG19A3L0001458	8.85308	3.14618	8.85308	up	noncoding	AK021484	lincRNA-SYNPO2	lincRNA	3422	chr4	+	119672345	119956974	NM_001128933,	TGAGAATTATCACATAGCCTAAATTCTAGCCTGGCAGCAAGAGTCACATCTGAGATGTCC	exon sense-overlapping	NM_001128933	SYNPO2	synaptopodin-2 isoform b	+	119809995	119959669	12505.6	1573.77	13.6802	10.534
ASHG19A3L0001458	8.85308	3.14618	8.85308	up	noncoding	AK021484	lincRNA-SYNPO2	lincRNA	3422	chr4	+	119672345	119956974	NM_001128933,	TGAGAATTATCACATAGCCTAAATTCTAGCCTGGCAGCAAGAGTCACATCTGAGATGTCC	intron sense-overlapping	NM_133477	SYNPO2	synaptopodin-2 isoform a	+	119809995	119982402	12505.6	1573.77	13.6802	10.534
ASHG19A3L0001458	8.85308	3.14618	8.85308	up	noncoding	AK021484	lincRNA-SYNPO2	lincRNA	3422	chr4	+	119672345	119956974	NM_001128933,	TGAGAATTATCACATAGCCTAAATTCTAGCCTGGCAGCAAGAGTCACATCTGAGATGTCC	intronic antisense	NM_014822	SEC24D	protein transport protein Sec24D	-	119643977	119757326	12505.6	1573.77	13.6802	10.534
ASHG19A3A015003	2.07851	1.05555	2.07851	up	noncoding	ENST00000425481	AC021016.6	Ensembl	529	chr2	-	219231388	219232045		TCAAGATGGGCATCTTGGTGATGATGCAGCACCCTGGGGAGCCCACCTGTATTCTCTTGG	natural antisense	NM_198559	C2orf62	hypothetical protein LOC375307	+	219221578	219232817	204.542	109.864	7.76132	6.70577
ASHG19A3A010653	2.02576	1.01846	2.02576	up	noncoding	ENST00000496512	RP11-54A1.1	Ensembl	544	chr18	+	48349946	48350490		TATTTACACACAAGAAAAAGGTATCCCACAAGAAACTGAAGAAACAACATGGCCTAGGAA	intronic antisense	NM_001127174	MRO	protein maestro isoform b	-	48321489	48351754	122.243	67.5578	7.01672	5.99826
ASHG19A3A020014	2.92404	1.54796	2.92404	up	noncoding	uc002zll.1	CR605662	UCSC_knowngene	1732	chr22	+	16373080	16377057		CCTGTTCCACATCTATGCATTCCCCATCTATCTAATGTATATTCAGACACAAATGTATAT	intergenic							475.628	184.124	8.98975	7.44179
ASHG19A3A026837	4.19798	2.0697	4.19798	up	noncoding	U43604		NRED	1677	chr5	-	59277982	59279648		TAAATAGTTTCCTGCTTAGAATCCTTAGGAGGAATTAGGATCTCCTTTCAGCCCTATCTT	intron sense-overlapping	NM_001165899	PDE4D	"cAMP-specific 3',5'-cyclic phosphodiesterase 4D"	-	58264865	59783925	258.522	68.9024	8.09739	6.0277
ASHG19A3A022374	2.17477	1.12086	2.17477	up	noncoding	ENST00000425396	AC093416.3	Ensembl	228	chr3	+	25728386	25728614		AGCACGAAAGCAAGCCCTACTGCAACCACTTGCTATGCCGCCATGTTTGGGCAAAAAGGC	intergenic							209.67	107.466	7.79767	6.6768
CUST_492_PI426073487	2.77181	1.47083	2.77181	up	noncoding	uc.12-	uc.12	UCR	201	chr1	-	35650226	35650427		ACGAACGTTGACTACGGAACCTTCTAAAATATTTACTTAACACACATGGACATCAACTAC	intron sense-overlapping	NM_005066	SFPQ	"splicing factor, proline- and glutamine-rich"	-	35649200	35658743	194.789	78.5504	7.68737	6.21654
ASHG19A3A033681	2.63497	1.39779	2.63497	up	noncoding	BC073825		misc_RNA	2641	chr7	-	143079922	143088204		TGACAGCCACATTCTGCCTCTGAGGATGCTCCATGTCCTGCATTAGCTGCTGGGTCAGCT	natural antisense	NM_001010972	ZYX	zyxin	+	143078359	143088206	253.466	107.163	8.07006	6.67228
ASHG19A3A033681	2.63497	1.39779	2.63497	up	noncoding	BC073825		misc_RNA	2641	chr7	-	143079922	143088204		TGACAGCCACATTCTGCCTCTGAGGATGCTCCATGTCCTGCATTAGCTGCTGGGTCAGCT	natural antisense	NM_003461	ZYX	zyxin	+	143078359	143088206	253.466	107.163	8.07006	6.67228
ASHG19A3A054281	2.00521	1.00375	2.00521	up	noncoding	AK094351		NRED	1912	chr16	+	9198704	9200618		GAAAGCAAACTCAGTTCCTCTTCATGTCCTATGTATTTAAGAGAGGACAGTTTTCCCTCA	intron sense-overlapping	NM_014117	C16orf72	hypothetical protein LOC29035	+	9185536	9213555	151.304	84.5177	7.32606	6.32231
ASHG19A3H0000023	2.70287	1.43449	2.70287	up	noncoding	nc-HOXA4-61-	nc-HOXA4-61	HOX cluster	158	chr7	-	27170427	27170585		GGGGCGCTGCACGTGGGGCACGGGGCGGGGCGCGCGCTGGGCTGGGGAGGAGCGGCTCGA	intergenic							362.29	151.609	8.59734	7.16285
CUST_216_PI426073487	2.18536	1.12787	2.18536	up	noncoding	uc.218+	uc.218	UCR	286	chr7	+	69802974	69803260		AATTTCAATGTTTTGATTACTATAGCAGATTTGACAGAGTAAGTGCCCCTCTAGTAGAGG	intron sense-overlapping	NM_015570	AUTS2	autism susceptibility gene 2 protein isoform 1	+	69063905	70257885	409.64	211.661	8.77197	7.6441
CUST_216_PI426073487	2.18536	1.12787	2.18536	up	noncoding	uc.218+	uc.218	UCR	286	chr7	+	69802974	69803260		AATTTCAATGTTTTGATTACTATAGCAGATTTGACAGAGTAAGTGCCCCTCTAGTAGAGG	intron sense-overlapping	NM_001127231	AUTS2	autism susceptibility gene 2 protein isoform 2	+	69063904	70257475	409.64	211.661	8.77197	7.6441
ASHG19A3L0002170	2.2287	1.1562	2.2287	up	noncoding	AK301414	lincRNA-PLEKHF2	lincRNA	1474	chr8	+	96037295	96088396		CCCTGGTTATATCATAAAAGGGCTCAATTTTTACATGAGGTCTCAATGGTCTTTTTACTT	exon sense-overlapping	NM_152416	C8orf38	phytoene synthase-like precursor	+	96037220	96070938	181.929	91.1718	7.59099	6.43479
ASHG19A3A033007	2.00817	1.00588	2.00817	up	noncoding	AY927482		RNAdb	973	chr7	-	73794353	73803479		TGATCGTCTCCTCTGAAATGTCATTCGACTCAATCATCTGCAAAAAGAGCCCCTGTAAGG	natural antisense	NM_032421	CLIP2	CAP-Gly domain-containing linker protein 2	+	73703804	73820273	132.929	74.031	7.13636	6.13048
ASHG19A3A033007	2.00817	1.00588	2.00817	up	noncoding	AY927482		RNAdb	973	chr7	-	73794353	73803479		TGATCGTCTCCTCTGAAATGTCATTCGACTCAATCATCTGCAAAAAGAGCCCCTGTAAGG	natural antisense	NM_003388	CLIP2	CAP-Gly domain-containing linker protein 2	+	73703804	73820273	132.929	74.031	7.13636	6.13048
ASHG19A3A014894	17.9293	4.16425	17.9293	up	noncoding	ENST00000430003	AC125238.2	Ensembl	1440	chr2	-	204499299	204500739		ATATATCTGGAAGACAGAAGGGCACGGTTACCTAGAGATCAACATAATCTTCCTCTGCAA	intergenic							1392.72	87.1417	10.5298	6.36552
ASHG19A3A023218	2.25021	1.17006	2.25021	up	noncoding	ENST00000470499	RP11-64K7.1	Ensembl	1310	chr3	+	131894245	131895555		CACGGTGAAAAATTGCTACTGAGAAGGATCTCTTGGAGAAGGATCTCTTGGAAGCTGTAA	intergenic							168.074	83.6737	7.47754	6.30748
ASHG19A3A037258	2.63266	1.39652	2.63266	up	noncoding	NR_003667	SUGT1P1	RefSeq_NR	699	chr9	-	33219069	33511047		CGGGGAGATCCTCTTACGAGGAAAAACTCCAAGATTACATCCCTGTTATCTTTCCTCCAA	intronic antisense	NM_014471	SPINK4	serine protease inhibitor Kazal-type 4	+	33240195	33248565	142.766	60.753	7.2381	5.84158
ASHG19A3A037258	2.63266	1.39652	2.63266	up	noncoding	NR_003667	SUGT1P1	RefSeq_NR	699	chr9	-	33219069	33511047		CGGGGAGATCCTCTTACGAGGAAAAACTCCAAGATTACATCCCTGTTATCTTTCCTCCAA	intron sense-overlapping	NM_001172415	BAG1	BAG family molecular chaperone regulator 1	-	33252469	33264759	142.766	60.753	7.2381	5.84158
ASHG19A3A037258	2.63266	1.39652	2.63266	up	noncoding	NR_003667	SUGT1P1	RefSeq_NR	699	chr9	-	33219069	33511047		CGGGGAGATCCTCTTACGAGGAAAAACTCCAAGATTACATCCCTGTTATCTTTCCTCCAA	intron sense-overlapping	NM_139235	NOL6	nucleolar protein 6 gamma isoform	-	33461350	33473941	142.766	60.753	7.2381	5.84158
ASHG19A3A037258	2.63266	1.39652	2.63266	up	noncoding	NR_003667	SUGT1P1	RefSeq_NR	699	chr9	-	33219069	33511047		CGGGGAGATCCTCTTACGAGGAAAAACTCCAAGATTACATCCCTGTTATCTTTCCTCCAA	intron sense-overlapping	NM_004323	BAG1	BAG family molecular chaperone regulator 1	-	33252469	33264759	142.766	60.753	7.2381	5.84158
ASHG19A3A037258	2.63266	1.39652	2.63266	up	noncoding	NR_003667	SUGT1P1	RefSeq_NR	699	chr9	-	33219069	33511047		CGGGGAGATCCTCTTACGAGGAAAAACTCCAAGATTACATCCCTGTTATCTTTCCTCCAA	intron sense-overlapping	NM_004925	AQP3	aquaporin-3	-	33441159	33447590	142.766	60.753	7.2381	5.84158
ASHG19A3A037258	2.63266	1.39652	2.63266	up	noncoding	NR_003667	SUGT1P1	RefSeq_NR	699	chr9	-	33219069	33511047		CGGGGAGATCCTCTTACGAGGAAAAACTCCAAGATTACATCCCTGTTATCTTTCCTCCAA	intronic antisense	NM_147133	NFX1	transcriptional repressor NF-X1 isoform 2	+	33290417	33365168	142.766	60.753	7.2381	5.84158
ASHG19A3A037258	2.63266	1.39652	2.63266	up	noncoding	NR_003667	SUGT1P1	RefSeq_NR	699	chr9	-	33219069	33511047		CGGGGAGATCCTCTTACGAGGAAAAACTCCAAGATTACATCCCTGTTATCTTTCCTCCAA	intronic antisense	NM_016410	CHMP5	charged multivesicular body protein 5 isoform 1	+	33264876	33282067	142.766	60.753	7.2381	5.84158
ASHG19A3A037258	2.63266	1.39652	2.63266	up	noncoding	NR_003667	SUGT1P1	RefSeq_NR	699	chr9	-	33219069	33511047		CGGGGAGATCCTCTTACGAGGAAAAACTCCAAGATTACATCCCTGTTATCTTTCCTCCAA	intron sense-overlapping	NM_022917	NOL6	nucleolar protein 6 alpha isoform	-	33461350	33473941	142.766	60.753	7.2381	5.84158
ASHG19A3A037258	2.63266	1.39652	2.63266	up	noncoding	NR_003667	SUGT1P1	RefSeq_NR	699	chr9	-	33219069	33511047		CGGGGAGATCCTCTTACGAGGAAAAACTCCAAGATTACATCCCTGTTATCTTTCCTCCAA	intronic antisense	NM_002504	NFX1	transcriptional repressor NF-X1 isoform 1	+	33290417	33371155	142.766	60.753	7.2381	5.84158
ASHG19A3A037258	2.63266	1.39652	2.63266	up	noncoding	NR_003667	SUGT1P1	RefSeq_NR	699	chr9	-	33219069	33511047		CGGGGAGATCCTCTTACGAGGAAAAACTCCAAGATTACATCCCTGTTATCTTTCCTCCAA	intronic antisense	NM_001195536	CHMP5	charged multivesicular body protein 5 isoform 2	+	33264876	33282067	142.766	60.753	7.2381	5.84158
ASHG19A3A037258	2.63266	1.39652	2.63266	up	noncoding	NR_003667	SUGT1P1	RefSeq_NR	699	chr9	-	33219069	33511047		CGGGGAGATCCTCTTACGAGGAAAAACTCCAAGATTACATCCCTGTTATCTTTCCTCCAA	intron sense-overlapping	NM_001170	AQP7	aquaporin-7	-	33384947	33402517	142.766	60.753	7.2381	5.84158
ASHG19A3A037258	2.63266	1.39652	2.63266	up	noncoding	NR_003667	SUGT1P1	RefSeq_NR	699	chr9	-	33219069	33511047		CGGGGAGATCCTCTTACGAGGAAAAACTCCAAGATTACATCCCTGTTATCTTTCCTCCAA	intronic antisense	NM_147134	NFX1	transcriptional repressor NF-X1 isoform 3	+	33290417	33348721	142.766	60.753	7.2381	5.84158
ASHG19A3A050118	3.93272	1.97553	3.93272	up	noncoding	ENST00000325496	RP11-5G9.4	Ensembl	2775	chr13	+	44542559	44545335	NM_201533,NM_201532,NM_003646,NM_001105540,	AAGAGCTGATTGAGGCTGCCAAGAGGAACGACTTCTGTAAGCTCCAGGAGCTGCACCGAG	intergenic							229.265	65.1256	7.92311	5.94758
ASHG19A3A049294	2.2936	1.19761	2.2936	up	noncoding	ENST00000419683	RP11-149B7.4	Ensembl	341	chr13	-	22057972	22058313		CCGCATCTCTTCCAAGGCCATTCGTTAATGACATCGTTGAGGGCATCGCGGGCGAGTCTT	intergenic							319.224	156.696	8.40777	7.21016
ASHG19A3A042364	3.00343	1.58661	3.00343	up	noncoding	uc001ihe.3	LOC100216001	UCSC_knowngene	2553	chr10	-	4621443	4720262		TGACACAGACTTCCTTAGATGTGTTGTCTTCCTGTCACTGGTGCATTCCTTATCAATGTG	intergenic							422.209	158.451	8.81495	7.22834
ASHG19A3A050330	2.04526	1.03229	2.04526	up	noncoding	ENST00000429803	RP11-388E20.1	Ensembl	370	chr13	+	78996957	78997327		GAAGATGAAGATTCACTAAACATAGGTAAATATTGGTTACCTATGTGCTTGTCACCACTT	intergenic							117.491	64.1747	6.95659	5.92431
ASHG19A3A008469	2.16131	1.11191	2.16131	up	noncoding	ENST00000510581	AC138645.1	Ensembl	428	chr17	-	44627758	44628278	uc010wkm.1,ENST00000514828,ENST00000508811,	TTAATGCCAAGATGAGTTTGTCAGTATAGCCATATCCTGGAACTTCTTTTTTGAGCTAAA	natural antisense	NM_001006607	LRRC37A2	leucine-rich repeat-containing protein 37A2	+	44590075	44633014	2709.17	1413.91	11.4881	10.3762
ASHG19A3A008469	2.16131	1.11191	2.16131	up	noncoding	ENST00000510581	AC138645.1	Ensembl	428	chr17	-	44627758	44628278	uc010wkm.1,ENST00000514828,ENST00000508811,	TTAATGCCAAGATGAGTTTGTCAGTATAGCCATATCCTGGAACTTCTTTTTTGAGCTAAA	intron sense-overlapping	NM_016632	ARL17A	ADP-ribosylation factor-like 17-like isoform b	-	44594067	44657088	2709.17	1413.91	11.4881	10.3762
ASHG19A3A037739	2.01496	1.01075	2.01496	up	noncoding	AK125873		misc_RNA	3583	chr9	-	97792028	97795781		TTGCTTTCCTGGGACATGTACCTTCTGATCATGCCCCTTTCCATGTTATGGTTAATGTAA	intronic antisense	NM_032823	C9orf3	aminopeptidase O isoform 2	+	97488950	97849500	140.91	78.1148	7.21914	6.20839
ASHG19A3A037739	2.01496	1.01075	2.01496	up	noncoding	AK125873		misc_RNA	3583	chr9	-	97792028	97795781		TTGCTTTCCTGGGACATGTACCTTCTGATCATGCCCCTTTCCATGTTATGGTTAATGTAA	intronic antisense	NM_001193329	C9orf3	aminopeptidase O isoform 1	+	97521930	97849500	140.91	78.1148	7.21914	6.20839
ASHG19A3A037157	2.30113	1.20234	2.30113	up	noncoding	AK022061		NRED	1427	chr9	-	19228914	19230326		CCCCCTGGAAACTATCTTTGACATTGACAATCCGAAGAGCAAAAGTTTAAGAAAGGATCT	intergenic							203.245	98.4609	7.75261	6.55026
ASHG19A3A013655	2.01499	1.01077	2.01499	up	noncoding	ENST00000421406	RP11-488L18.4	Ensembl	1465	chr1	-	247353152	247372795		CCTTTAATACCTGCTCATGTCTTACTCAGGACCAGAGTTCATATTGAACTAAAGAATTAT	intergenic							160.111	88.9539	7.40855	6.39778
ASHG19A3A040769	2.1047	1.07362	2.1047	up	noncoding	NR_003007	SCARNA23	RefSeq_NR	130	chrX	+	24762557	24762687		AGTAGCTTTCTGTTCTTCCTTTGCAAGTAAAAAGGGTGGGTCGTTCCACTACTGACATTT	intron sense-overlapping	NM_016937	POLA1	DNA polymerase alpha catalytic subunit	+	24712063	25015102	224.302	119.12	7.89142	6.8178
ASHG19A3A049368	2.193	1.1329	2.193	up	noncoding	ENST00000419457	RP11-97E23.3	Ensembl	1499	chr13	-	29296522	29298158	NM_001146152,NM_000786,	TTACTCTTGGCAGGGCAGCATTCATCCTCAACTACTAGTGCTTGGATGGACTTCTTTTTG	intergenic							1225.24	634.887	10.3468	9.21386
ASHG19A3A007700	2.11616	1.08145	2.11616	up	noncoding	NR_030672	KIAA1324L	RefSeq_NR	6613	chr7	-	86506224	86669550		actccgtgggcgtaggaccctccgagccagAAAGATTATCACTTTGAATATACGGAATGT	exon sense-overlapping	NM_152748	KIAA1324L	estrogen-induced gene 121-like protein isoform	-	86506222	86595291	2572.33	1376.96	11.4199	10.3384
ASHG19A3A007700	2.11616	1.08145	2.11616	up	noncoding	NR_030672	KIAA1324L	RefSeq_NR	6613	chr7	-	86506224	86669550		actccgtgggcgtaggaccctccgagccagAAAGATTATCACTTTGAATATACGGAATGT	exon sense-overlapping	NM_001142749	KIAA1324L	estrogen-induced gene 121-like protein isoform	-	86506222	86689014	2572.33	1376.96	11.4199	10.3384
ASHG19A3L0001177	2.38878	1.25627	2.38878	up	noncoding	AW177676	lincRNA-CAPN13	lincRNA	119	chr2	-	31124660	31124765		AAGATTTAGACCTCAAACCATGCTTGGAGAATCATCACCCTAGAGCAGTCTCACCATCCT	intergenic							176.949	83.0601	7.55351	6.29724
ASHG19A3A052787	2.66194	1.41248	2.66194	up	noncoding	BC029383		NRED	1431	chr1	-	8440420	8441820		GTGTTGAAAAGTTTCTGAAGCTTTCTGCAGCTGGAAAATCAAGCTTTTAAAAAAGCTCTT	intron sense-overlapping	NM_001042682	RERE	arginine-glutamic acid dipeptide repeats protein	-	8412463	8483747	146.268	61.6217	7.27478	5.8623
ASHG19A3A052787	2.66194	1.41248	2.66194	up	noncoding	BC029383		NRED	1431	chr1	-	8440420	8441820		GTGTTGAAAAGTTTCTGAAGCTTTCTGCAGCTGGAAAATCAAGCTTTTAAAAAAGCTCTT	intron sense-overlapping	NM_001042681	RERE	arginine-glutamic acid dipeptide repeats protein	-	8412463	8877699	146.268	61.6217	7.27478	5.8623
ASHG19A3A052787	2.66194	1.41248	2.66194	up	noncoding	BC029383		NRED	1431	chr1	-	8440420	8441820		GTGTTGAAAAGTTTCTGAAGCTTTCTGCAGCTGGAAAATCAAGCTTTTAAAAAAGCTCTT	intron sense-overlapping	NM_012102	RERE	arginine-glutamic acid dipeptide repeats protein	-	8412463	8877699	146.268	61.6217	7.27478	5.8623
ASHG19A3A011923	2.78606	1.47823	2.78606	up	noncoding	ENST00000513808	AC010326.1	Ensembl	2130	chr19	-	58373300	58376612		ATTTCTCAAGTGCCATGCCTTTAGGTGCCTATACATCATGCTATCATAGGATTTCTAGGG	natural antisense	NM_001204817	ZNF587	zinc finger protein 587 isoform 2	+	58361180	58376491	368.404	149.52	8.62135	7.14313
ASHG19A3A011923	2.78606	1.47823	2.78606	up	noncoding	ENST00000513808	AC010326.1	Ensembl	2130	chr19	-	58373300	58376612		ATTTCTCAAGTGCCATGCCTTTAGGTGCCTATACATCATGCTATCATAGGATTTCTAGGG	natural antisense	NM_032828	ZNF587	zinc finger protein 587 isoform 1	+	58361180	58376491	368.404	149.52	8.62135	7.14313
ASHG19A3A055309	3.77754	1.91745	3.77754	up	noncoding	uc010vhg.1	MTE	UCSC_knowngene	242	chr16	+	56710043	56711675		TGGACCCCAATTGCTCCTGCTCCACTACTCCTGCAAATGCAGAGAGTGCAAATGCACCTC	intergenic							2172.95	653.712	11.1773	9.25982
ASHG19A3A038429	2.38488	1.25392	2.38488	up	noncoding	uc010miw.1	CDKN2BAS	UCSC_knowngene	2660	chr9	+	21994789	22077889		GAGAATGATACCTGCTTCTCTATCTTGTTGGGTTTTACAGATGATGTATTGAAAGTTCAA	intronic antisense	NM_078487	CDKN2B	cyclin-dependent kinase 4 inhibitor B isoform 2	-	22002901	22009312	807.415	382.809	9.74582	8.4919
ASHG19A3A038429	2.38488	1.25392	2.38488	up	noncoding	uc010miw.1	CDKN2BAS	UCSC_knowngene	2660	chr9	+	21994789	22077889		GAGAATGATACCTGCTTCTCTATCTTGTTGGGTTTTACAGATGATGTATTGAAAGTTCAA	bidirectional	NM_058195	CDKN2A	cyclin-dependent kinase inhibitor 2A isoform	-	21967750	21994490	807.415	382.809	9.74582	8.4919
ASHG19A3A038429	2.38488	1.25392	2.38488	up	noncoding	uc010miw.1	CDKN2BAS	UCSC_knowngene	2660	chr9	+	21994789	22077889		GAGAATGATACCTGCTTCTCTATCTTGTTGGGTTTTACAGATGATGTATTGAAAGTTCAA	intronic antisense	NM_004936	CDKN2B	cyclin-dependent kinase 4 inhibitor B isoform 1	-	22002901	22009312	807.415	382.809	9.74582	8.4919
ASHG19A3A047060	2.09658	1.06804	2.09658	up	noncoding	NR_027288	LOC341056	RefSeq_NR	2046	chr11	+	122888273	122890318		GCGGGGCTGGCGGGCAGTTGGCATGAGCGGGACCGAAGCTGAGGCAGGAAGAGCCGGCAC	intergenic							173.018	92.0709	7.51907	6.45103
ASHG19A3A012499	3.05132	1.60943	3.05132	up	noncoding	ENST00000422383	RP4-680D5.4	Ensembl	225	chr1	-	15941137	15941362		CTGCAGTCAACTGCCAGTCTCCTCATGGTCTTGCTTTCTCTTCTATATTTCTACTGTTAA	intergenic							4530	1664.48	12.2215	10.612
ASHG19A3A009500	10.4872	3.39055	10.4872	up	noncoding	ENST00000418393	AC004231.2	Ensembl	815	chr17	+	39077681	39132178		AGAAAGGAAATGAACCGGCTTTGACAATCAGAAGGCTGGATTGCCATGTTGATTGGCAGT	intronic antisense	NM_213656	KRT39	"keratin, type I cytoskeletal 39"	-	39114668	39123144	490.659	53.1264	9.03679	5.64624
ASHG19A3A009500	10.4872	3.39055	10.4872	up	noncoding	ENST00000418393	AC004231.2	Ensembl	815	chr17	+	39077681	39132178		AGAAAGGAAATGAACCGGCTTTGACAATCAGAAGGCTGGATTGCCATGTTGATTGGCAGT	natural antisense	NM_015515	KRT23	"keratin, type I cytoskeletal 23"	-	39078951	39093836	490.659	53.1264	9.03679	5.64624
ASHG19A3A039112	3.26298	1.70619	3.26298	up	noncoding	AK098037		misc_RNA	2204	chr9	+	114453496	114455701		GTATGTTAGGACTGTTTGGAAGAGGTAACGTAAATACATGTGAATAGGGTATATAACTGA	natural antisense	NM_173521	C9orf84	hypothetical protein LOC158401 isoform 1	-	114448900	114545779	588.75	203.873	9.29368	7.58749
ASHG19A3A039112	3.26298	1.70619	3.26298	up	noncoding	AK098037		misc_RNA	2204	chr9	+	114453496	114455701		GTATGTTAGGACTGTTTGGAAGAGGTAACGTAAATACATGTGAATAGGGTATATAACTGA	natural antisense	NM_001080551	C9orf84	hypothetical protein LOC158401 isoform 2	-	114448900	114521813	588.75	203.873	9.29368	7.58749
ASHG19A3A030624	2.68994	1.42757	2.68994	up	noncoding	ENST00000445585	RP5-899B16.2	Ensembl	786	chr6	-	140177240	140198528		CACATACACACACTAGAGAACAAGAAGGAATAGTAAACAGTTCCCTCCACTGCTAGAGGG	intergenic							964.372	405.473	9.99917	8.57159
ASHG19A3A049291	2.41751	1.27352	2.41751	up	noncoding	BC036362		misc_RNA	3774	chr13	-	21931801	21935559		GATAATTCATACTTCTCATGGTTCACACCCACCACAAACATGGATCTGCACAAGAGCACA	intergenic							152.7	70.6795	7.33816	6.06464
ASHG19A3A037698	2.65669	1.40963	2.65669	up	noncoding	NR_024020	NOL8	RefSeq_NR	4440	chr9	-	95059640	95087876		TAACTCAGCAGGTTTAGGTCCATTCCATTTGGCATCAGCAGACATGGTAGCACTTTACTG	natural antisense	NM_001012267	CENPP	centromere protein P	+	95087740	95377437	523.693	223.198	9.12794	7.71831
ASHG19A3A037698	2.65669	1.40963	2.65669	up	noncoding	NR_024020	NOL8	RefSeq_NR	4440	chr9	-	95059640	95087876		TAACTCAGCAGGTTTAGGTCCATTCCATTTGGCATCAGCAGACATGGTAGCACTTTACTG	exon sense-overlapping	NM_017948	NOL8	nucleolar protein 8	-	95059639	95087876	523.693	223.198	9.12794	7.71831
ASHG19A3A048981	3.49094	1.80362	3.49094	up	noncoding	BC038193		RNAdb	687	chr12	+	104235228	104238438		ACTGCCTCAATCATGACGTGATGACAAGAGTCACTTGCCAATAAATGACCTGCTAGATAT	bidirectional	NM_001031701	NT5DC3	5'-nucleotidase domain-containing protein 3	-	104166080	104234975	248.285	79.6885	8.04094	6.23732
ASHG19A3A033870	10.6452	3.41213	10.6452	up	noncoding	uc003slj.1	AK127048	UCSC_knowngene	4481	chr7	+	1884935	1889567		TGTTCTGCAGCTGATTTGCTCCTTGGCCCCAAGAATGGAATACAGATAATCTGCTCACAT	intronic antisense	NM_001013836	MAD1L1	mitotic spindle assembly checkpoint protein	-	1855427	2272583	876.547	91.8611	9.85967	6.44754
ASHG19A3A033870	10.6452	3.41213	10.6452	up	noncoding	uc003slj.1	AK127048	UCSC_knowngene	4481	chr7	+	1884935	1889567		TGTTCTGCAGCTGATTTGCTCCTTGGCCCCAAGAATGGAATACAGATAATCTGCTCACAT	intronic antisense	NM_001013837	MAD1L1	mitotic spindle assembly checkpoint protein	-	1855427	2272583	876.547	91.8611	9.85967	6.44754
ASHG19A3A033870	10.6452	3.41213	10.6452	up	noncoding	uc003slj.1	AK127048	UCSC_knowngene	4481	chr7	+	1884935	1889567		TGTTCTGCAGCTGATTTGCTCCTTGGCCCCAAGAATGGAATACAGATAATCTGCTCACAT	intronic antisense	NM_003550	MAD1L1	mitotic spindle assembly checkpoint protein	-	1855427	2272583	876.547	91.8611	9.85967	6.44754
ASHG19A3L0002024	3.3173	1.73001	3.3173	up	noncoding	DB340248	lincRNA-KCNK9-1	lincRNA	555	chr8	+	140120891	140121447		ATCTTGTCTGACTTTGATTCCATTCCTTTTATGTCAATCATGGGGCACATTACCTTTCAT	intergenic							1051.03	356.987	10.1188	8.38878
ASHG19A3A036375	4.05078	2.0182	4.05078	up	noncoding	ENST00000398202	AC009898.1	Ensembl	651	chr8	+	14166528	14167183		TTTTAAAAACGAAAAAAGCAAAACTTGGCAAGCAAACCTGCTGCGGCTGATCTCTAAGTT	intronic antisense	NM_139167	SGCZ	zeta-sarcoglycan	-	13947372	15095792	579.015	161.196	9.26982	7.25162
ASHG19A3A055072	2.21328	1.14619	2.21328	up	noncoding	uc001ekv.2	LOC728855	UCSC_knowngene	304	chr1	-	144339562	144340773	uc009wlc.2,ENST00000417554,	AGTCCAGAGCTGAGGACTGCCTGTTTGCAGATTTCAGATACTCAGACTCCACCTTTACTT	intergenic							265.744	134.983	8.13954	6.99335
ASHG19A3A034433	2.18173	1.12547	2.18173	up	noncoding	ENST00000415181	RP11-3N2.2	Ensembl	719	chr7	+	63545937	63546954		CATCAGGTCCTAAGGCAACTCAGCTTCTGCTAGTAGTAAAATCCAGTAAGATTGGTATTT	intergenic							333.808	172.528	8.47172	7.34625
ASHG19A3A054216	2.34296	1.22833	2.34296	up	noncoding	uc002csr.1	AK098017	UCSC_knowngene	2216	chr16	+	3039054	3043505		TTCCCCCTGAACCCCACAGGCTTAGGGAGCCCAAATGGCTACAGATCTGGTAAAGCTGGT	intergenic							166.857	79.7965	7.46784	6.23951
ASHG19A3A018253	3.0746	1.6204	3.0746	up	noncoding	ENST00000421424	C20orf127	Ensembl	177	chr20	+	33805811	33805988	uc002ejo.1,NR_001447,NM_176870,NM_175617,NM_005949,NM_005946,	AAGTGCAAAGAGTGCAAATGCACCTCCTGCAAGAAGAGCTGCTGCTCCTGCTGCCCCATG	intergenic							26045.2	9290.81	14.7299	13.1095
ASHG19A3A042093	3.05405	1.61072	3.05405	up	noncoding	ENST00000400275	AC010877.1	Ensembl	741	chrY	+	15398517	15399258	NM_002791,	AGGATTCTTACAGAAGCAGAGATTGATGCTCATCTTGTTGCTCTAGCAGAGAGAGACTAA	intronic antisense	NM_007125	UTY	histone demethylase UTY isoform 3	-	15360262	15592550	55783.3	19530.6	15.7873	14.1766
ASHG19A3A034014	4.78264	2.25781	4.78264	up	noncoding	HIT000325634		H-invDB	635	chr7	+	19154851	19155484		GATGCCTTTCCTTTCAGTGGCTGATTGGCACGACCTCTTGAGAATGCATGCATGAAAAAA	natural antisense	NM_000474	TWIST1	twist-related protein 1	-	19155090	19157295	406.673	95.4404	8.76259	6.50478
ASHG19A3A053303	2.17973	1.12415	2.17973	up	noncoding	ENST00000431060	AC015712.1	Ensembl	3893	chr15	+	101390035	101404487		CTGAAAAATGAAGACGTTCCCACCAGTTCCAGAAAACAGGGCTAACTTAAAATGCAGCCC	intergenic							224.485	115.035	7.89274	6.76859
ASHG19A3A010732	2.03562	1.02547	2.03562	up	noncoding	ENST00000430751	RP3-434O14.8	Ensembl	591	chr1	-	209960323	209961038		ATAGGTTGTCAGGCATTTACCTTATTACCACTCAAATACCAGTGTGTGTGTGTTGGGGGG	exon sense-overlapping	NM_006147	IRF6	interferon regulatory factor 6 isoform 1	-	209958967	209979520	706.179	392.55	9.55156	8.52609
ASHG19A3A010732	2.03562	1.02547	2.03562	up	noncoding	ENST00000430751	RP3-434O14.8	Ensembl	591	chr1	-	209960323	209961038		ATAGGTTGTCAGGCATTTACCTTATTACCACTCAAATACCAGTGTGTGTGTGTTGGGGGG	exon sense-overlapping	NM_001206696	IRF6	interferon regulatory factor 6 isoform 2	-	209958967	209979520	706.179	392.55	9.55156	8.52609
ASHG19A3A017320	2.25908	1.17574	2.25908	up	noncoding	uc010gbl.1	BC048109	UCSC_knowngene	1564	chr20	-	5412655	5426394		TTAACATTCAGAAGCCTTCATCTCCCATCTGCAAAATGGGCATGTCCAACTCAGAAGCTG	intergenic							586.644	293.823	9.28913	8.11339
ASHG19A3A041432	2.24769	1.16844	2.24769	up	noncoding	ENST00000435496	ASSP5	Ensembl	1239	chrX	+	114899214	114900453	NM_054012,NM_000050,ENST00000429695,ENST00000405226,	AACATCAATTCCCTCAGGCTGAAGGAATATCATCATCTCCAGAGCAAGGTCACTGCCAAA	intergenic							7308.47	3601.74	12.9082	11.7397
ASHG19A3A007269	2.27101	1.18333	2.27101	up	noncoding	NR_024206	NCRNA00152	RefSeq_NR	518	chr2	+	87754973	87821028	NR_024373,	AGGTGGAGCCACCAGCCTCTCCTTGAATAACTGGGAGATGAAACAGGAAGCTCTATGACA	intergenic							1717.8	856.339	10.836	9.65268
CUST_165_PI426073487	2.31048	1.20819	2.31048	up	noncoding	uc.167+	uc.167	UCR	201	chr5	+	88179623	88179824		TGGTGAATCAATCTTTCCATTCCTGACATTTTGCTAATTTTAGTTTTACGGTGGGGTAAT	intronic antisense	NM_001131005	MEF2C	myocyte-specific enhancer factor 2C isoform 2	-	88014057	88199922	139.514	67.5478	7.206	5.99781
CUST_165_PI426073487	2.31048	1.20819	2.31048	up	noncoding	uc.167+	uc.167	UCR	201	chr5	+	88179623	88179824		TGGTGAATCAATCTTTCCATTCCTGACATTTTGCTAATTTTAGTTTTACGGTGGGGTAAT	intronic antisense	NM_001193347	MEF2C	myocyte-specific enhancer factor 2C isoform 3	-	88014057	88199922	139.514	67.5478	7.206	5.99781
CUST_165_PI426073487	2.31048	1.20819	2.31048	up	noncoding	uc.167+	uc.167	UCR	201	chr5	+	88179623	88179824		TGGTGAATCAATCTTTCCATTCCTGACATTTTGCTAATTTTAGTTTTACGGTGGGGTAAT	bidirectional	NM_001193350	MEF2C	myocyte-specific enhancer factor 2C isoform 1	-	88014057	88179283	139.514	67.5478	7.206	5.99781
CUST_165_PI426073487	2.31048	1.20819	2.31048	up	noncoding	uc.167+	uc.167	UCR	201	chr5	+	88179623	88179824		TGGTGAATCAATCTTTCCATTCCTGACATTTTGCTAATTTTAGTTTTACGGTGGGGTAAT	bidirectional	NM_002397	MEF2C	myocyte-specific enhancer factor 2C isoform 1	-	88014057	88179283	139.514	67.5478	7.206	5.99781
ASHG19A3A021971	2.28559	1.19257	2.28559	up	noncoding	uc003fjb.1	AF279780	UCSC_knowngene	1768	chr3	-	178243274	178578185		ACTTGGTACACACGTTCACACTCACAGACACATACACAAACGTTGGATAGGAAAAGGCTG	intronic antisense	NM_005832	KCNMB2	calcium-activated potassium channel subunit	+	178276617	178562217	257.406	126.155	8.09197	6.8994
ASHG19A3A021971	2.28559	1.19257	2.28559	up	noncoding	uc003fjb.1	AF279780	UCSC_knowngene	1768	chr3	-	178243274	178578185		ACTTGGTACACACGTTCACACTCACAGACACATACACAAACGTTGGATAGGAAAAGGCTG	intronic antisense	NM_181361	KCNMB2	calcium-activated potassium channel subunit	+	178254223	178562217	257.406	126.155	8.09197	6.8994
ASHG19A3A046231	2.37308	1.24676	2.37308	up	noncoding	HIT000195378		H-invDB	1277	chr11	+	27911648	27912921		TGATGATCAATGACATCAACTGGGCAATTTCTGCCTGAAAGGCGAATGTCTCAACCTCCT	intergenic							251.314	118.542	8.05779	6.81103
ASHG19A3A008651	4.57897	2.19502	4.57897	up	noncoding	uc002iyl.2	AF086204	UCSC_knowngene	445	chr17	-	58160928	58165654	NR_030732,	GGGGATATGGGAGGCAGGGAAGAGGGGTTGTTTCTTTTAATAAATCATCATTGTTAAAAG	intergenic							1788.77	443.163	10.8942	8.69919
ASHG19A3A028327	2.33481	1.22331	2.33481	up	noncoding	HIT000327966_11		H-invDB	368	chr5	+	68942596	68942963		CATGATTTTGAAGTCAAAAGAGAGAGAATATTTGCCAAGGAGGGGTGAGTTATAGTATGT	intergenic							301.583	145.822	8.32762	7.10431
ASHG19A3A027196	3.28895	1.71762	3.28895	up	noncoding	ENST00000503650	RP11-313L6.3	Ensembl	777	chr5	-	103819904	104728671		AACAGTGGAATCAGCAGGAATGTGTCCCCTAAAGTCCCTTAAACTAAGTTGGAACACAAC	intergenic							861.266	295.586	9.83963	8.12201
ASHG19A3A000370	2.36118	1.23951	2.36118	up	noncoding	ENST00000457758	RP11-152N13.5	Ensembl	548	chr10	+	75012789	75014102		GCTTTTGCCGTGCTGTGATCCAGGGCAGAGCTCCAGGCTTCATACGGTAAAACTCTCTGG	bidirectional	NM_016065	MRPS16	"28S ribosomal protein S16, mitochondrial"	-	75008600	75012451	288.82	137.741	8.26116	7.02165
ASHG19A3A000370	2.36118	1.23951	2.36118	up	noncoding	ENST00000457758	RP11-152N13.5	Ensembl	548	chr10	+	75012789	75014102		GCTTTTGCCGTGCTGTGATCCAGGGCAGAGCTCCAGGCTTCATACGGTAAAACTCTCTGG	natural antisense	NM_145170	TTC18	tetratricopeptide repeat protein 18	-	75013515	75118617	288.82	137.741	8.26116	7.02165
ASHG19A3A019762	2.20628	1.14162	2.20628	up	noncoding	NR_033531	IFT27	RefSeq_NR	777	chr22	-	37168446	37172172		GCTACTTGTTCTGGTTCTGGAGAAGAAAGAAAACAACATTTGACATTGATCTGTATTTTG	exon sense-overlapping	NM_006860	IFT27	intraflagellar transport protein 27 homolog	-	37154245	37172172	140.93	71.3652	7.2193	6.07768
ASHG19A3A019762	2.20628	1.14162	2.20628	up	noncoding	NR_033531	IFT27	RefSeq_NR	777	chr22	-	37168446	37172172		GCTACTTGTTCTGGTTCTGGAGAAGAAAGAAAACAACATTTGACATTGATCTGTATTTTG	exon sense-overlapping	NM_001177701	IFT27	intraflagellar transport protein 27 homolog	-	37154245	37172172	140.93	71.3652	7.2193	6.07768
ASHG19A3A021823	2.2343	1.15982	2.2343	up	noncoding	ENST00000490318	RP11-118D22.3	Ensembl	1060	chr3	-	155893640	155894700		TGACTAGCCCTTCATTATCTCAGCATCGAGTGACAAGAGACTGTTGGGATATGGAATGGA	intronic antisense	NM_003471	KCNAB1	voltage-gated potassium channel subunit beta-1	+	155860750	156256927	1296.72	656.305	10.4249	9.26504
ASHG19A3A021823	2.2343	1.15982	2.2343	up	noncoding	ENST00000490318	RP11-118D22.3	Ensembl	1060	chr3	-	155893640	155894700		TGACTAGCCCTTCATTATCTCAGCATCGAGTGACAAGAGACTGTTGGGATATGGAATGGA	intronic antisense	NM_172160	KCNAB1	voltage-gated potassium channel subunit beta-1	+	155838336	156256927	1296.72	656.305	10.4249	9.26504
ASHG19A3A043299	2.11718	1.08214	2.11718	up	noncoding	NR_024140	NCRNA00081	RefSeq_NR	2383	chr10	-	112658487	112679124		TACCAGGATTTGCATATCCTTCAAGATGCCTGAAGACAATCGGAGGGGTATACAAGCAAG	exon sense-overlapping	NM_001195307	BBIP1	non-protein coding RNA 81 isoform 3	-	112658487	112679124	168.542	89.0497	7.48202	6.39988
ASHG19A3A043299	2.11718	1.08214	2.11718	up	noncoding	NR_024140	NCRNA00081	RefSeq_NR	2383	chr10	-	112658487	112679124		TACCAGGATTTGCATATCCTTCAAGATGCCTGAAGACAATCGGAGGGGTATACAAGCAAG	bidirectional	NM_007373	SHOC2	leucine-rich repeat protein SHOC-2	+	112679300	112773425	168.542	89.0497	7.48202	6.39988
ASHG19A3A043299	2.11718	1.08214	2.11718	up	noncoding	NR_024140	NCRNA00081	RefSeq_NR	2383	chr10	-	112658487	112679124		TACCAGGATTTGCATATCCTTCAAGATGCCTGAAGACAATCGGAGGGGTATACAAGCAAG	exon sense-overlapping	NM_001195304	BBIP1	non-protein coding RNA 81 isoform 1	-	112658487	112679124	168.542	89.0497	7.48202	6.39988
ASHG19A3A043299	2.11718	1.08214	2.11718	up	noncoding	NR_024140	NCRNA00081	RefSeq_NR	2383	chr10	-	112658487	112679124		TACCAGGATTTGCATATCCTTCAAGATGCCTGAAGACAATCGGAGGGGTATACAAGCAAG	exon sense-overlapping	NM_001195306	BBIP1	non-protein coding RNA 81 isoform 2	-	112658487	112678694	168.542	89.0497	7.48202	6.39988
ASHG19A3A043299	2.11718	1.08214	2.11718	up	noncoding	NR_024140	NCRNA00081	RefSeq_NR	2383	chr10	-	112658487	112679124		TACCAGGATTTGCATATCCTTCAAGATGCCTGAAGACAATCGGAGGGGTATACAAGCAAG	natural antisense	NM_014456	PDCD4	programmed cell death protein 4 isoform 1	+	112631552	112659764	168.542	89.0497	7.48202	6.39988
ASHG19A3A043299	2.11718	1.08214	2.11718	up	noncoding	NR_024140	NCRNA00081	RefSeq_NR	2383	chr10	-	112658487	112679124		TACCAGGATTTGCATATCCTTCAAGATGCCTGAAGACAATCGGAGGGGTATACAAGCAAG	natural antisense	NM_001199492	PDCD4	programmed cell death protein 4 isoform 3	+	112631552	112659764	168.542	89.0497	7.48202	6.39988
ASHG19A3A043299	2.11718	1.08214	2.11718	up	noncoding	NR_024140	NCRNA00081	RefSeq_NR	2383	chr10	-	112658487	112679124		TACCAGGATTTGCATATCCTTCAAGATGCCTGAAGACAATCGGAGGGGTATACAAGCAAG	natural antisense	NM_145341	PDCD4	programmed cell death protein 4 isoform 2	+	112631552	112659764	168.542	89.0497	7.48202	6.39988
ASHG19A3A043299	2.11718	1.08214	2.11718	up	noncoding	NR_024140	NCRNA00081	RefSeq_NR	2383	chr10	-	112658487	112679124		TACCAGGATTTGCATATCCTTCAAGATGCCTGAAGACAATCGGAGGGGTATACAAGCAAG	exon sense-overlapping	NM_001195305	BBIP1	non-protein coding RNA 81 isoform 2	-	112658487	112679124	168.542	89.0497	7.48202	6.39988
ASHG19A3A046728	2.57443	1.36425	2.57443	up	noncoding	ENST00000500163	AP003065.3	Ensembl	1816	chr11	+	72411518	72416644		ACAGCCCTGCCCAGGACCTCAGTTTACACATCTATTCAATGGATGACAGTGAAATTAGAT	natural antisense	NM_015242	ARAP1	"arf-GAP with Rho-GAP domain, ANK repeat and PH"	-	72396113	72433403	187.571	81.4003	7.6332	6.26894
ASHG19A3A046728	2.57443	1.36425	2.57443	up	noncoding	ENST00000500163	AP003065.3	Ensembl	1816	chr11	+	72411518	72416644		ACAGCCCTGCCCAGGACCTCAGTTTACACATCTATTCAATGGATGACAGTGAAATTAGAT	intronic antisense	NM_001135190	ARAP1	"arf-GAP with Rho-GAP domain, ANK repeat and PH"	-	72396113	72433403	187.571	81.4003	7.6332	6.26894
ASHG19A3A046728	2.57443	1.36425	2.57443	up	noncoding	ENST00000500163	AP003065.3	Ensembl	1816	chr11	+	72411518	72416644		ACAGCCCTGCCCAGGACCTCAGTTTACACATCTATTCAATGGATGACAGTGAAATTAGAT	natural antisense	NM_001040118	ARAP1	"arf-GAP with Rho-GAP domain, ANK repeat and PH"	-	72396113	72463434	187.571	81.4003	7.6332	6.26894
ASHG19A3A023910	2.3581	1.23763	2.3581	up	noncoding	ENST00000504402	RP11-367J11.3	Ensembl	292	chr4	-	7096297	7105056		GCCTCAGCCAAGTGAAATGGGAATCAGGACCATTACAAAGAAATTCAATTAAAATAAAAG	intergenic							260.975	123.972	8.11303	6.8754
ASHG19A3A040652	2.20653	1.14178	2.20653	up	noncoding	ENST00000439462	ASS1P4	Ensembl	1234	chrX	+	3285189	3286423		TTCATCACCATCAGTTCCCTTAGGCTGAAGGAATATCATCATCTCCAGAGCAACGTCACT	intergenic							2995.96	1519.31	11.6265	10.4847
ASHG19A3A021577	2.50384	1.32414	2.50384	up	noncoding	ENST00000434244	RP5-1198O20.4	Ensembl	2644	chr1	+	44509599	44570647		GATTCTCCATCTCTGTACGCTTATTGATCTCATCCTCGTACTTGTTCTTGAAGTCCTCCA	intergenic							2242.42	1010.17	11.2207	9.89658
ASHG19A3A053406	2.01577	1.01133	2.01577	up	noncoding	uc002cri.1	LOC100128788	UCSC_knowngene	1778	chr16	-	2787076	2800811		TCTGAACTGCTTAAAACTCTTCCAGACACCCTCAGGTTGACATCACAACTCCTTTGTTGG	intergenic							226.773	125.837	7.90707	6.89574
ASHG19A3A007598	3.26907	1.70888	3.26907	up	noncoding	NR_027932	CLLU1	RefSeq_NR	2831	chr12	+	92815306	92824778		atcatgggacttcttggcctccataattgtGGGCAAAAAGGAAAGAGACAAAACAGCATG	intronic antisense	NM_001025232	CLLU1OS	putative chronic lymphocytic leukemia	-	92813869	92821924	179.113	61.605	7.57072	5.86184
ASHG19A3A007598	3.26907	1.70888	3.26907	up	noncoding	NR_027932	CLLU1	RefSeq_NR	2831	chr12	+	92815306	92824778		atcatgggacttcttggcctccataattgtGGGCAAAAAGGAAAGAGACAAAACAGCATG	exon sense-overlapping	NM_001025233	CLLU1	chronic lymphocytic leukemia up-regulated	+	92817734	92824730	179.113	61.605	7.57072	5.86184
ASHG19A3A050039	2.05027	1.03581	2.05027	up	noncoding	U50537		misc_RNA	682	chr13	+	33106335	33107014		GGGGGTAAGAAAGATCCCACTGTTTTACTCATTCTCTCAAATTACTTTTAAAAACCTCTA	intronic antisense	NM_033111	N4BP2L2	NEDD4-binding protein 2-like 2 isoform 1	-	33006929	33112936	108.293	59.1559	6.83851	5.8027
ASHG19A3A050039	2.05027	1.03581	2.05027	up	noncoding	U50537		misc_RNA	682	chr13	+	33106335	33107014		GGGGGTAAGAAAGATCCCACTGTTTTACTCATTCTCTCAAATTACTTTTAAAAACCTCTA	intronic antisense	NM_014887	N4BP2L2	NEDD4-binding protein 2-like 2 isoform 2	-	33091029	33112932	108.293	59.1559	6.83851	5.8027
ASHG19A3A019306	2.34352	1.22868	2.34352	up	noncoding	AK097961		misc_RNA	2064	chr1	+	31989983	31992045		GGATGGTCCTTGTTTCTGTTATATCTCCCTGCTTCCTCTTTTCAGTTCTCTGAATATATG	intergenic							5932.03	2857.9	12.6181	11.3894
ASHG19A3A008536	2.83976	1.50577	2.83976	up	noncoding	ENST00000422816	AC004797.1	Ensembl	654	chr17	-	47501630	47502284	NM_001968,NM_001130679,NM_001130678,	ATAGGGAGGGTATACAAGGAAAGGTTAGGACTTCCTCCAAAGATAGTGATTGGTTATCAG	intergenic							5270.03	2095.9	12.4467	10.9409
ASHG19A3A028802	2.03041	1.02177	2.03041	up	noncoding	ENST00000508950	CTB-49A3.4	Ensembl	264	chr5	+	132592183	132611669		CGTGAGCGCTGATTTAGTTTCAGGAAAACAATAACACTTTGTCCCATTAAATTAATGTTG	intronic antisense	NM_015082	FSTL4	follistatin-related protein 4 precursor	-	132532151	132948223	183.906	100.833	7.60726	6.58549
ASHG19A3A049750	2.13136	1.09177	2.13136	up	noncoding	AF339816		misc_RNA	1516	chr13	-	96445761	96447234		TGGCTAGGGTACGCCTCTCTGATTTCACTTTTCCTGAAAGAGCCATAAAGGTTACCTGAT	natural antisense	NM_006260	DNAJC3	dnaJ homolog subfamily C member 3 precursor	+	96329392	96447243	1904.02	1010.56	10.9886	9.89687
ASHG19A3H0000028	2.40492	1.26599	2.40492	up	noncoding	nc-HOXA4-66-	nc-HOXA4-66	HOX cluster	307	chr7	-	27180687	27180994		TAATTAATGCTGTTGTAGAGGTGACTTGATGAGACACAACTTGTTCGACGTGTAGTGACT	exon sense-overlapping	NM_019102	HOXA5	homeobox protein Hox-A5	-	27180670	27183287	300.246	140.889	8.32045	7.05446
ASHG19A3A047843	2.26686	1.1807	2.26686	up	noncoding	uc001szi.3	CR613944	UCSC_knowngene	3386	chr12	-	81186299	81189685		GTGGTTCAACCTGACCAAAGTGGTATTATGCTGCTGGGAAGTAAAAGTATTAGACACCAA	intergenic							6585.1	3239.27	12.7622	11.5815
ASHG19A3A037744	2.43949	1.28658	2.43949	up	noncoding	uc009wzz.1	AK055590	UCSC_knowngene	2329	chr1	+	201487830	201499602		GTCTCTCATGGAAAGAAAAGTATTAAACCCATGATGATTACATCTTAGTCTAAGGGGAAT	intergenic							201.682	92.2866	7.74102	6.45444
ASHG19A3A028988	2.18449	1.12729	2.18449	up	noncoding	ENST00000507235	ASS1P10	Ensembl	1244	chr5	+	144608373	144609617		ATCAACTCCCTCAGACTGAAGGAATACCATTGTCTCCAGAGTAAGTTCACTGCCAGATAG	intergenic							2191.92	1134.26	11.1897	10.0624
ASHG19A3A034143	2.21181	1.14523	2.21181	up	noncoding	CR617239		RNAdb	491	chr7	+	30725896	30726384		TGTGTGTGTGTTGCATTGAGGAATTATTTCAAGGTATCTTTGAATCCATTCGGATTCTTG	intronic antisense	NM_001202475	CRHR2	corticotropin-releasing factor receptor 2	-	30691558	30739719	616.929	315.014	9.35758	8.21235
ASHG19A3A034143	2.21181	1.14523	2.21181	up	noncoding	CR617239		RNAdb	491	chr7	+	30725896	30726384		TGTGTGTGTGTTGCATTGAGGAATTATTTCAAGGTATCTTTGAATCCATTCGGATTCTTG	natural antisense	NM_001202481	CRHR2	corticotropin-releasing factor receptor 2	-	30691558	30739719	616.929	315.014	9.35758	8.21235
ASHG19A3A024500	4.17768	2.0627	4.17768	up	noncoding	uc003hto.2	CR610949	UCSC_knowngene	5090	chr4	-	96083660	96088750		CTTGGTTTGTAAATTGCCTGCATTTATTCTGTCAGCCAACATGTACAAAATGTAAGAAAG	exon sense-overlapping	NM_003728	UNC5C	netrin receptor UNC5C precursor	-	96083655	96470361	804.746	216.901	9.74082	7.67812
ASHG19A3A028023	2.46888	1.30386	2.46888	up	noncoding	ENST00000502928	RP11-811J10.1	Ensembl	141	chr5	+	21196828	21196969		TTAACCACATTCTTCATTGATTGCATGGCTGCCCTCAGTCTGGACTATGACCGGAAGAAA	intergenic							1568.53	715.943	10.6976	9.39378
ASHG19A3A039696	3.05457	1.61097	3.05457	up	noncoding	ENST00000420305	GS1-309P15.1	Ensembl	455	chrX	-	27445893	27446348		GTTTTGGGTGAGCTCCAGTTGCTAGTTGCCCTAGCTTTAATTGAAGGTGGAATGAAATAT	intergenic							839.27	309.476	9.79924	8.18827
ASHG19A3A038819	2.27625	1.18666	2.27625	up	noncoding	ENST00000418694	RP11-336N8.2	Ensembl	1250	chr9	+	80793178	80794428		ATTGATGCCATCAGGTTCATCAACATCAATTCCCTCACGCTGAGGGAATATCATCGTCTC	intergenic							2509.19	1247	11.3846	10.1979
ASHG19A3L0000750	2.03345	1.02393	2.03345	up	noncoding	AI902766	lincRNA-GPHN-1	lincRNA	416	chr14	+	66313475	66313886		GGAGACTTGCTTCATATCACCAGCTTCTACTTTGTCCCCAGAGACATTTCTACTTCTACT	intergenic							103.243	56.8051	6.76664	5.74271
ASHG19A3H0000063	2.11293	1.07925	2.11293	up	noncoding	nc-HOXB9-186-	nc-HOXB9-186	HOX cluster	168	chr17	-	46715352	46715520		TGCACATATTCACACACACACTCACACACAGGAATGCTGACACATACAGACCCGACTTTA	intergenic							114.339	60.5696	6.91627	5.83702
ASHG19A3A050970	2.54683	1.3487	2.54683	up	noncoding	AK094156		NRED	3302	chr1	-	144516418	144519720		TCAGAGTGGCAGTTAACATCTTGCTATTCTGCCTTGTGGACTTGAGGTGGAAAGGTTCAT	intergenic							267.145	117.331	8.14642	6.79772
ASHG19A3A018251	3.33039	1.73569	3.33039	up	noncoding	NR_026685	PDIK1L	RefSeq_NR	4287	chr1	+	26437655	26452024		AACTGCACCGCCCGCAAACATGGCTCAGTGACTCGGAGAAAAGCTGCAGTCTCCCTCCCG	exon sense-overlapping	NM_152835	PDIK1L	serine/threonine-protein kinase PDIK1L	+	26438267	26452026	4247.27	1428	12.1268	10.3911
ASHG19A3A049578	2.253	1.17185	2.253	up	noncoding	AF086440		misc_RNA	492	chr13	-	51928000	51928472		CAGGGACAAGGCATTTAAAAATTTACTGTTGAAGGATACTTTAAAAGGGCTGCTGATATT	intronic antisense	NM_001101320	SERPINE3	serpin E3 precursor	+	51915167	51936239	474.172	238.408	8.98354	7.8117
ASHG19A3L0001794	2.17937	1.12391	2.17937	up	noncoding	chr6:3775751-3789451-	lincRNA-C6orf145-2	lincRNA	13701	chr6	-	3775751	3789451		TAGAAAGGCCTGATTGTCCCCAAAATATCTTCCCCTGCTAAACTTGTCATCACATCTGAA	intergenic							1317.43	683.492	10.4504	9.32645
ASHG19A3A054590	3.24619	1.69875	3.24619	up	noncoding	CR622027		misc_RNA	1452	chr16	+	54154369	54155821		TTTATAAGTCAGTAAAACACAGCGGCTTCATACTCTGTGCTTATTACCCAGAAGCCCCGG	intergenic							395.107	137.41	8.71755	7.0188
ASHG19A3A030677	2.62737	1.39362	2.62737	up	noncoding	ENST00000433442	RP11-162J8.3	Ensembl	130	chr6	-	149348835	149353709		AGAGAGAGGGATGGAAATTGTGACCAGAGAGTTGGAGTTGGGACCCCTGTCTTGATCACT	intronic antisense	NM_005715	UST	uronyl 2-sulfotransferase	+	149068270	149398126	326.913	140.324	8.4428	7.04918
ASHG19A3A055091	2.4354	1.28416	2.4354	up	noncoding	uc001lvb.1	H19	UCSC_knowngene	1652	chr11	-	2016405	2019057		TGGACGAGGGGAGCTGGTGGGCAGGGGTCTGGTGCGGAGAGGGCCCACAGTGGACTTGGT	intergenic							292.812	135.286	8.28055	6.99639
ASHG19A3A026618	2.00581	1.00418	2.00581	up	noncoding	ENST00000507887	CTD-2306M5.1	Ensembl	638	chr5	-	25413547	25446034		GTTTATTTACAACCAACATCTCATTTCCCCGTAAGTCTCCATTTCTTCTCATATGCACTG	intergenic							313.307	176.225	8.38119	7.377
ASHG19A3A024781	2.23002	1.15705	2.23002	up	noncoding	ENST00000512692	RP11-425I13.3	Ensembl	1985	chr4	-	141204879	141294514		AAACCTGAGAATTGGAGTGAGAATCCCAGTGTGGAAAATCAGGAAAGAGGCTGGTATGAG	intronic antisense	NM_001153585	SCOC	short coiled-coil protein isoform 4	+	141264614	141303710	186.898	93.4582	7.62861	6.47156
ASHG19A3A024781	2.23002	1.15705	2.23002	up	noncoding	ENST00000512692	RP11-425I13.3	Ensembl	1985	chr4	-	141204879	141294514		AAACCTGAGAATTGGAGTGAGAATCCCAGTGTGGAAAATCAGGAAAGAGGCTGGTATGAG	intronic antisense	NM_001153635	SCOC	short coiled-coil protein isoform 5	+	141264596	141303710	186.898	93.4582	7.62861	6.47156
ASHG19A3A024781	2.23002	1.15705	2.23002	up	noncoding	ENST00000512692	RP11-425I13.3	Ensembl	1985	chr4	-	141204879	141294514		AAACCTGAGAATTGGAGTGAGAATCCCAGTGTGGAAAATCAGGAAAGAGGCTGGTATGAG	bidirectional	NM_001153552	SCOC	short coiled-coil protein isoform 3	+	141294663	141303710	186.898	93.4582	7.62861	6.47156
ASHG19A3A024781	2.23002	1.15705	2.23002	up	noncoding	ENST00000512692	RP11-425I13.3	Ensembl	1985	chr4	-	141204879	141294514		AAACCTGAGAATTGGAGTGAGAATCCCAGTGTGGAAAATCAGGAAAGAGGCTGGTATGAG	bidirectional	NM_001153484	SCOC	short coiled-coil protein isoform 1	+	141294663	141303710	186.898	93.4582	7.62861	6.47156
ASHG19A3A024781	2.23002	1.15705	2.23002	up	noncoding	ENST00000512692	RP11-425I13.3	Ensembl	1985	chr4	-	141204879	141294514		AAACCTGAGAATTGGAGTGAGAATCCCAGTGTGGAAAATCAGGAAAGAGGCTGGTATGAG	bidirectional	NM_001153663	SCOC	short coiled-coil protein isoform 2	+	141294663	141303710	186.898	93.4582	7.62861	6.47156
ASHG19A3A024781	2.23002	1.15705	2.23002	up	noncoding	ENST00000512692	RP11-425I13.3	Ensembl	1985	chr4	-	141204879	141294514		AAACCTGAGAATTGGAGTGAGAATCCCAGTGTGGAAAATCAGGAAAGAGGCTGGTATGAG	intronic antisense	NM_001153690	SCOC	short coiled-coil protein isoform 6	+	141264614	141303710	186.898	93.4582	7.62861	6.47156
ASHG19A3A024781	2.23002	1.15705	2.23002	up	noncoding	ENST00000512692	RP11-425I13.3	Ensembl	1985	chr4	-	141204879	141294514		AAACCTGAGAATTGGAGTGAGAATCCCAGTGTGGAAAATCAGGAAAGAGGCTGGTATGAG	intronic antisense	NM_001153446	SCOC	short coiled-coil protein isoform 4	+	141264596	141303710	186.898	93.4582	7.62861	6.47156
ASHG19A3A024781	2.23002	1.15705	2.23002	up	noncoding	ENST00000512692	RP11-425I13.3	Ensembl	1985	chr4	-	141204879	141294514		AAACCTGAGAATTGGAGTGAGAATCCCAGTGTGGAAAATCAGGAAAGAGGCTGGTATGAG	intronic antisense	NM_032547	SCOC	short coiled-coil protein isoform 4	+	141178439	141303710	186.898	93.4582	7.62861	6.47156
ASHG19A3A028976	2.03914	1.02796	2.03914	up	noncoding	ENST00000508349	CTC-463A16.1	Ensembl	2621	chr5	+	141545331	141547952		GTACGTGCATTTGACCTATATTGCTATGTCTTTAATAAAAGCATCTGAGGAATAGTTCCT	intergenic							429.211	239.022	8.84314	7.81519
ASHG19A3A021297	2.46742	1.303	2.46742	up	noncoding	ENST00000492267	RP11-657G2.1	Ensembl	1507	chr3	-	82855665	82857172	NM_001146152,NM_000786,	TGATCGCTACTTATAGGATAACCCAGCATCAAGGGAAAAGTTTGCCTATGTGCCATTTGG	intergenic							2994.28	1358.84	11.6246	10.3216
ASHG19A3A033337	2.04673	1.03332	2.04673	up	noncoding	uc003vcq.1	AF520792	UCSC_knowngene	413	chr7	-	104754024	104754437		GTATTGCATTTTTATACCTAAGATGCATTCACAGAACTGCTGCTGACAGGAAAGAAAAAA	natural antisense	NM_182931	MLL5	histone-lysine N-methyltransferase MLL5	+	104654636	104754532	427.795	237.115	8.8378	7.80448
ASHG19A3A033337	2.04673	1.03332	2.04673	up	noncoding	uc003vcq.1	AF520792	UCSC_knowngene	413	chr7	-	104754024	104754437		GTATTGCATTTTTATACCTAAGATGCATTCACAGAACTGCTGCTGACAGGAAAGAAAAAA	natural antisense	NM_018682	MLL5	histone-lysine N-methyltransferase MLL5	+	104654636	104754532	427.795	237.115	8.8378	7.80448
ASHG19A3A009769	3.04005	1.60409	3.04005	up	noncoding	ENST00000432896	AC005962.2	Ensembl	114	chr17	+	56234808	56234926	NR_002307,	TTGCAGAGGGTGCGGACTTCTCCAGCTCTCCGAACCTCACGGAGACTCAGGTCAAAATCT	intergenic							292.155	107.183	8.2767	6.67261
ASHG19A3A054996	3.23955	1.69579	3.23955	up	noncoding	ENST00000514273	AL450226.1	Ensembl	1625	chr17	-	2207755	2211342		GTGTCTTCGTTAATGCCACCAACAAATATCTTTTCCATAGTTAAGTGGGCATCTGGTCTT	intronic antisense	NM_021947	SRR	serine racemase	+	2207247	2228553	179.251	62.1119	7.57168	5.87588
ASHG19A3A053204	29.8756	4.9009	29.8756	up	noncoding	ENST00000448445	NCRNA00052	Ensembl	408	chr15	+	88121334	88121746	NR_026869,	GTTTTAAACAGCACACTCACTTTACTCTGAACTATACCTCACATGCACACGAGCTTTCTG	intergenic							9763.37	365.583	13.3251	8.42421
ASHG19A3A048604	2.77099	1.4704	2.77099	up	noncoding	AK124576		NRED	4983	chr12	+	51904564	51909547		CTGCCCAGATTTTTGTGTGCTCACCTCAATGGGTGAAAAATAAAGTCTGTGTAAACTGTT	intergenic							1730.7	709.086	10.8499	9.37948
ASHG19A3A020134	2.53071	1.33954	2.53071	up	noncoding	NR_027051	FLJ39582	RefSeq_NR	2632	chr22	+	21356210	21364662	ENST00000452284,	AGAATGTTCCAGGGTCGTGTAGGTGGTCAGGATGGAGTTGTAGGGCTCCGTCATGGCCAT	natural antisense	NM_001008695	THAP7	THAP domain-containing protein 7 isoform 2	-	21354060	21356404	164.704	72.8354	7.44637	6.10683
ASHG19A3A020134	2.53071	1.33954	2.53071	up	noncoding	NR_027051	FLJ39582	RefSeq_NR	2632	chr22	+	21356210	21364662	ENST00000452284,	AGAATGTTCCAGGGTCGTGTAGGTGGTCAGGATGGAGTTGTAGGGCTCCGTCATGGCCAT	natural antisense	NM_030573	THAP7	THAP domain-containing protein 7 isoform 1	-	21354060	21356404	164.704	72.8354	7.44637	6.10683
CUST_12_PI426075208	2.14325	1.0998	2.14325	up	noncoding	nc-HOXA13-100+	nc-HOXA13-100	HOX cluster	916	chr7	+	27245788	27246704		ACTTATTAGTGGGTAAATGACTATATTTCATTTCAGCACAACTTCTCCCCTGGTAGAAAC	intergenic							2439.31	1283.54	11.3383	10.2385
ASHG19A3A036378	2.23209	1.15839	2.23209	up	noncoding	AK022085		misc_RNA	2076	chr8	+	15633531	15635608		TTCAATCAGAGACTCTGCCTTCAATCTGAGTGACATCAGACTCAGAGCCCACACTTTAAG	intergenic							136.657	68.3798	7.176	6.01761
ASHG19A3A021965	2.09371	1.06606	2.09371	up	noncoding	ENST00000423174	ASS1P7	Ensembl	1226	chr3	-	177014948	177016174		TTCATCAACATCAATTCCCTCAGGCTGAAGGAATATCACCGTGTCCAGAACAAGGTCACT	intergenic							3722.51	2004.35	11.9433	10.8772
ASHG19A3A041438	2.72917	1.44846	2.72917	up	noncoding	ENST00000424402	RP11-232D9.4	Ensembl	301	chrX	+	115822837	115824153		GGAGTTGCTCTAGGCTGGTGTATAATAATTTTCTACATTATTTGGATTCCAATTATGGCT	intergenic							3649.77	1499.31	11.9119	10.4634
ASHG19A3A040661	2.30173	1.20272	2.30173	up	noncoding	BC131500		misc_RNA	441	chrX	+	6983504	6983935		GCTACTTATGGGTCACGTGTTCTCTGTATTCAATACACCATTCTCCTCCAATCGCAGTGA	intronic antisense	NM_001178135	HDHD1	pseudouridine-5'-monophosphatase isoform c	-	6975626	7066231	731.465	359.539	9.60332	8.4006
ASHG19A3A040661	2.30173	1.20272	2.30173	up	noncoding	BC131500		misc_RNA	441	chrX	+	6983504	6983935		GCTACTTATGGGTCACGTGTTCTCTGTATTCAATACACCATTCTCCTCCAATCGCAGTGA	intronic antisense	NM_001178136	HDHD1	pseudouridine-5'-monophosphatase isoform d	-	6966960	7066231	731.465	359.539	9.60332	8.4006
ASHG19A3A040661	2.30173	1.20272	2.30173	up	noncoding	BC131500		misc_RNA	441	chrX	+	6983504	6983935		GCTACTTATGGGTCACGTGTTCTCTGTATTCAATACACCATTCTCCTCCAATCGCAGTGA	intronic antisense	NM_001135565	HDHD1	pseudouridine-5'-monophosphatase isoform a	-	6966960	7066231	731.465	359.539	9.60332	8.4006
ASHG19A3A040661	2.30173	1.20272	2.30173	up	noncoding	BC131500		misc_RNA	441	chrX	+	6983504	6983935		GCTACTTATGGGTCACGTGTTCTCTGTATTCAATACACCATTCTCCTCCAATCGCAGTGA	intronic antisense	NM_012080	HDHD1	pseudouridine-5'-monophosphatase isoform b	-	6966960	7066231	731.465	359.539	9.60332	8.4006
ASHG19A3A046290	2.72841	1.44806	2.72841	up	noncoding	NR_024625	API5	RefSeq_NR	3844	chr11	+	43333504	43366080		TCATCCATCTCCCCCAACTCAAAAATGAAACAAAGATGGAGGGAGAACGGAATTGGGAAG	exon sense-overlapping	NM_006595	API5	apoptosis inhibitor 5 isoform b	+	43333504	43366080	2377.58	982.077	11.3023	9.85429
ASHG19A3A046290	2.72841	1.44806	2.72841	up	noncoding	NR_024625	API5	RefSeq_NR	3844	chr11	+	43333504	43366080		TCATCCATCTCCCCCAACTCAAAAATGAAACAAAGATGGAGGGAGAACGGAATTGGGAAG	exon sense-overlapping	NM_001142930	API5	apoptosis inhibitor 5 isoform a	+	43333504	43366080	2377.58	982.077	11.3023	9.85429
ASHG19A3A046290	2.72841	1.44806	2.72841	up	noncoding	NR_024625	API5	RefSeq_NR	3844	chr11	+	43333504	43366080		TCATCCATCTCCCCCAACTCAAAAATGAAACAAAGATGGAGGGAGAACGGAATTGGGAAG	exon sense-overlapping	NM_001142931	API5	apoptosis inhibitor 5 isoform c	+	43333504	43366080	2377.58	982.077	11.3023	9.85429
ASHG19A3L0002933	2.21729	1.1488	2.21729	up	noncoding	BX956284	lincRNA-MYO1B-2	lincRNA	566	chr2	-	192295237	192295802		AGTATTAAAAAAGCCAAACAAAGATACCAACTCCACTTCTGGCACCATCTGGCCTCATCT	intergenic							186.941	94.0079	7.62888	6.48008
ASHG19A3A050985	2.23007	1.15709	2.23007	up	noncoding	BX647685		RNAdb	4077	chr14	-	75890386	75894444		ATGGGAAGGCTTCTCTTCCAATGACCACCAATGAGAATGTTATAAAATATGTCTAAAGGT	bidirectional	NM_001135047	JDP2	jun dimerization protein 2 isoform a	+	75894508	75939404	256.443	128.829	8.08657	6.92948
ASHG19A3A050985	2.23007	1.15709	2.23007	up	noncoding	BX647685		RNAdb	4077	chr14	-	75890386	75894444		ATGGGAAGGCTTCTCTTCCAATGACCACCAATGAGAATGTTATAAAATATGTCTAAAGGT	bidirectional	NM_001135048	JDP2	jun dimerization protein 2 isoform a	+	75894919	75939404	256.443	128.829	8.08657	6.92948
ASHG19A3A050985	2.23007	1.15709	2.23007	up	noncoding	BX647685		RNAdb	4077	chr14	-	75890386	75894444		ATGGGAAGGCTTCTCTTCCAATGACCACCAATGAGAATGTTATAAAATATGTCTAAAGGT	bidirectional	NM_130469	JDP2	jun dimerization protein 2 isoform a	+	75895059	75939404	256.443	128.829	8.08657	6.92948

## Sheet: lncRNAs_down
# Fold Change cut-off: 2.0 # Condition pairs: pcDNA3.1-PinX1 vs Empty Vector # Column A: ProbeName, it represents probe name. # Column B: Fold change, positive value indicates up-regulation and negative value indicates down-regulation. # Column C: Log Fold change, log2 value of absolute fold change. Positive value indicates up-regulation and negative value indicates down-regulation. # Column D: A…
pcDNA3.1-PinX1 vs Empty Vector 2.0 fold down regulated LncRNAs
	Fold Change and Regulation				Annotations																		Raw Intensities		Normalized Intensities
ProbeName	Fold change([pcDNA3.1-PinX1] vs [Empty Vector])	Log Fold change([pcDNA3.1-PinX1] vs [Empty Vector])	Absolute Fold change([pcDNA3.1-PinX1] vs [Empty Vector])	Regulation([pcDNA3.1-PinX1] vs [Empty Vector])	type	seqname	GeneSymbol	source	RNAlength	chrom	strand	txStart	txEnd	Xhyb	probeSeq	relationship	Associated_gene_acc	Associated_gene_name	Associated_protein_name	Associated_gene_strand	Associated_gene_start	Associated_gene_end	[pcDNA3.1-PinX1](raw)	[Empty Vector](raw)	[pcDNA3.1-PinX1](normalized)	[Empty Vector](normalized)
ASHG19A3A032313	-2.35027	-1.23283	2.35027	down	noncoding	ENST00000435810	RP11-252P19.1	Ensembl	1122	chr6	+	166167676	166189268		GAAACATCTTCCCAGAAAACAGACTACAACAAATCATTTCCCTGGTATGAAGGAATGAAG	intergenic							100.88	264.086	6.7296	7.96243
ASHG19A3A042659	-3.22426	-1.68897	3.22426	down	noncoding	ENST00000431395	RP11-124O11.2	Ensembl	500	chr10	-	43474464	43476955		CCCAGGTAGGAACTGCAGCTATTTTTAAACTGAGATTTCCTACAAATTAAAATTGCTTTG	intergenic							79.5306	286.913	6.39102	8.07999
ASHG19A3A026824	-2.06123	-1.04351	2.06123	down	noncoding	ENST00000510053	CTD-2516K3.3	Ensembl	2025	chr5	-	56613815	56615847		TAATTAAATCCCAAAAGGACCCAGACATGGCAATAGAGATTTGTGCTATGGATACTGTCG	intergenic							80.691	185.735	6.41072	7.45423
ASHG19A3A052113	-2.38532	-1.25419	2.38532	down	noncoding	AK021664		RNAdb	1800	chr15	-	48426829	48428628	uc001zwf.1,	ATAGCAGGTATTACGCCGTGCTGCAAGGTTATGGTTCTCCAGATGGACACCATTACATTT	natural antisense	NM_205850	SLC24A5	sodium/potassium/calcium exchanger 5 precursor	+	48413168	48434589	87.9665	233.914	6.52976	7.78395
ASHG19A3A016888	-2.28532	-1.19239	2.28532	down	noncoding	AK091534		RNAdb	2937	chr2	+	208467341	208470282	NM_004379,	ACGGGCCTGACATCAAATGGAAAGGAAGGATAATGTCCAGGAGTTGGAATGTTATCCTTG	exon sense-overlapping	NM_004379	CREB1	cyclic AMP-responsive element-binding protein 1	+	208394615	208470284	69.7086	178.568	6.20317	7.39556
ASHG19A3A016888	-2.28532	-1.19239	2.28532	down	noncoding	AK091534		RNAdb	2937	chr2	+	208467341	208470282	NM_004379,	ACGGGCCTGACATCAAATGGAAAGGAAGGATAATGTCCAGGAGTTGGAATGTTATCCTTG	exon sense-overlapping	NM_134442	CREB1	cyclic AMP-responsive element-binding protein 1	+	208394615	208470284	69.7086	178.568	6.20317	7.39556
ASHG19A3A046591	-2.35999	-1.23878	2.35999	down	noncoding	uc010rog.1	NEAT1	UCSC_knowngene	17357	chr11	+	65190268	65207625	NR_028272,CR591879,	AATCTTAAAAAGTCCACAGCAGATGCATCCGGCTCGAGGGGCCATCAGCTTTGAATAAAT	intergenic							608.132	1622.88	9.33867	10.5775
ASHG19A3A010099	-2.16788	-1.11629	2.16788	down	noncoding	NR_029406	FLJ43681	RefSeq_NR	2256	chr17	+	81174665	81188573	ENST00000441866,ENST00000417636,	TCCTGATTAATGGCCGATGAATTTCTCCTTAAGGCCCTGAAACTGCCTACTCAGAACCAA	intergenic							66.1914	160.252	6.12806	7.24434
ASHG19A3A051762	-2.23327	-1.15916	2.23327	down	noncoding	ENST00000448875	AL162151.3	Ensembl	158	chr14	+	99439650	99439808	NM_001033853,NM_000967,ENST00000417878,ENST00000413027,ENST00000396745,	TAAGGATGACCCGTCCAAGCCGGTCCACCTCACAGCCTTCCTGGGATACAAGGCTGGCAT	intergenic							5434.34	13485	12.488	13.6472
ASHG19A3A049421	-2.91836	-1.54516	2.91836	down	noncoding	ENST00000454681	RP11-141M1.3	Ensembl	844	chr13	-	33929342	34250905		TAAAAATGTAATGGAATTGCAGAGTTGTTGGCATTCAGATGTGTAGGTGGTGGGTGGCAA	intergenic							167.802	555.521	7.47532	9.02048
ASHG19A3A049051	-3.28809	-1.71725	3.28809	down	noncoding	ENST00000424240	ADAM1	Ensembl	2129	chr12	+	112337066	112339195		ACGTGTAATGGGAAGGGAGTTTGTAATGATTTAGGGCACTGCCACTGTAATGAAGGGCAT	intergenic							110.443	409.032	6.86503	8.58228
ASHG19A3A031631	-2.19201	-1.13225	2.19201	down	noncoding	AL049354		NRED	1275	chr6	+	52532698	52533951	NR_024405,NR_024403,	ACTTCACAGAAATGGAAGGTAACCTCTTTAGACGTGTGCCTGCAAGATGGCTGTCATTGT	intergenic							378.475	940.776	8.65677	9.78902
ASHG19A3A013545	-2.60097	-1.37905	2.60097	down	noncoding	AK126362		misc_RNA	2241	chr2	-	42558384	42560624		GCCCAAAAGAGTAGGATAGCCACATTAGACTTACAAGACTTACAGCAACTCCACCAGAAA	natural antisense	NM_001145076	EML4	echinoderm microtubule-associated protein-like 4	+	42396489	42559688	252.213	740.24	8.06243	9.44148
ASHG19A3A013545	-2.60097	-1.37905	2.60097	down	noncoding	AK126362		misc_RNA	2241	chr2	-	42558384	42560624		GCCCAAAAGAGTAGGATAGCCACATTAGACTTACAAGACTTACAGCAACTCCACCAGAAA	natural antisense	NM_019063	EML4	echinoderm microtubule-associated protein-like 4	+	42396489	42559688	252.213	740.24	8.06243	9.44148
ASHG19A3A053034	-2.08474	-1.05987	2.08474	down	noncoding	AK022441		NRED	3537	chr15	+	71595109	71598646		TGTGAAGATAACTTTTTCCCTCAAACGATTGTAAAGAGCTTAAAGGCATTAAGATGAGAG	intron sense-overlapping	NM_024817	THSD4	thrombospondin type-1 domain-containing protein	+	71433787	72075722	1450.47	3393.07	10.5901	11.65
ASHG19A3A019406	-2.2011	-1.13823	2.2011	down	noncoding	uc002zkr.3	BC016035	UCSC_knowngene	1174	chr22	-	16124263	16193004	uc001vvq.1,	CATATATGCAACTATGACAGGAGGTACTAAAAGCCTTAGATAAGCATGGTGTATCTTTTT	intergenic							144.45	358.321	7.25579	8.39402
ASHG19A3A046173	-2.19411	-1.13363	2.19411	down	noncoding	ENST00000333752	AC116533.3	Ensembl	264	chr11	+	17073577	17073845	BC008657,	AACAACAGATGTCTCAATATTCCTCGTCCTAGAACTCTCAGAGGATCCAGAACTACAGCC	intergenic							376.628	937.87	8.64959	9.78323
ASHG19A3L0000524	-6.16753	-2.62469	6.16753	down	noncoding	BG898852	lincRNA-RAB3IP	lincRNA	605	chr12	-	70474248	70474753		AGATTTCATTAGGCACACACACACCTACACACATTACAGAAGGAAACTAAAATATTTCAG	intergenic							84.4095	585.965	6.47391	9.09861
ASHG19A3A051165	-2.02662	-1.01908	2.02662	down	noncoding	CR606271		misc_RNA	1189	chr1	-	145590668	145591854		TATTAGGGGTGCTACAGTAGAAGAGTAAACACTATGTACAGAGAGGCCAGAAAGGGAAAA	intergenic							135.673	308.762	7.16505	8.18413
ASHG19A3L0001378	-2.70914	-1.43784	2.70914	down	noncoding	AJ493605	lincRNA-C3orf35	lincRNA	981	chr3	+	37427759	37459039	NM_178342,	AAGGTGATTGCATGCTGGTGTCTTTAGCTAAAAATAAAGTTAATGTCTTTGGGGCAATCA	exon sense-overlapping	NM_178342	C3orf35	AP20 region protein 1 isoform E	+	37440967	37459865	141.722	432.281	7.22673	8.66457
ASHG19A3L0001378	-2.70914	-1.43784	2.70914	down	noncoding	AJ493605	lincRNA-C3orf35	lincRNA	981	chr3	+	37427759	37459039	NM_178342,	AAGGTGATTGCATGCTGGTGTCTTTAGCTAAAAATAAAGTTAATGTCTTTGGGGCAATCA	exon sense-overlapping	NM_178339	C3orf35	AP20 region protein 1 isoform B	+	37440967	37476988	141.722	432.281	7.22673	8.66457
ASHG19A3A028673	-4.19705	-2.06938	4.19705	down	noncoding	uc003kry.2	BC045192	UCSC_knowngene	3084	chr5	+	116751207	116915432		CTTCTGCAGATCCCATCTAAAATTACATTTCCAGGCATTCCACATAACCGGAGGAAAAAA	intergenic							146.136	691.259	7.27317	9.34254
ASHG19A3A031052	-3.02881	-1.59875	3.02881	down	noncoding	AL117559		misc_RNA	1654	chr6	+	22221009	22222616		TCAAACGCTAATCCAAGTTCCCTGCAAAACCTGTTCTGTTTTATATAACATTTACTCGTT	intergenic							87.9366	296.653	6.52912	8.12787
ASHG19A3A016377	-3.67616	-1.8782	3.67616	down	noncoding	ENST00000431979	AC093838.7	Ensembl	3516	chr2	+	132394597	132407188		TTGCTTGAGAAAATCAGATAATTGCTTGAGAAAATTAGGACATTGCTTGAGGAAGTTAGG	intergenic							314.452	1310.29	8.38759	10.2658
ASHG19A3A040525	-2.12632	-1.08836	2.12632	down	noncoding	AK025525		misc_RNA	2225	chrX	-	150574867	150577076		CAAGTCAATTGGTTGTTTCTTTTGGCAAAGCTGATGACATTTTCATGATGAAAATGTTCC	natural antisense	NM_001017980	VMA21	vacuolar ATPase assembly integral membrane	+	150565656	150577836	166.676	400.323	7.46525	8.55361
ASHG19A3A033806	-7.91036	-2.98374	7.91036	down	noncoding	AY927455		RNAdb	678	chr7	-	155592733	155601766		CCAGCCTCCCTCATGACTAAATGCATATCTATTCCTGTCAAAACGTGTATCACAATGTAC	exon sense-overlapping	NM_000193	SHH	sonic hedgehog protein preproprotein	-	155595557	155604967	3638.7	31549.8	11.9077	14.8914
ASHG19A3A051413	-2.1549	-1.10762	2.1549	down	noncoding	BC043427		misc_RNA	2224	chr14	+	50795992	50798152		GGCCTGTTGTGCTACCTGGGTCACATATGATGGAGAATAAAACATTAATTTTGTAACTGT	natural antisense	NM_004196	CDKL1	cyclin-dependent kinase-like 1	-	50796719	50862617	227.08	553.916	7.90917	9.01679
ASHG19A3A042008	-2.21067	-1.14448	2.21067	down	noncoding	NR_026710	NCRNA00105	RefSeq_NR	1789	chrY	+	1469423	1482478		GGGGGCGCATGTAGCTGCACGCCCCTCTGTAATTGCTGAAATAAAAAGATGGTCTGCTGT	natural antisense	NM_001173473	ASMTL	N-acetylserotonin O-methyltransferase-like	-	1472031	1522655	351.134	880.908	8.54678	9.69126
ASHG19A3A042008	-2.21067	-1.14448	2.21067	down	noncoding	NR_026710	NCRNA00105	RefSeq_NR	1789	chrY	+	1469423	1482478		GGGGGCGCATGTAGCTGCACGCCCCTCTGTAATTGCTGAAATAAAAAGATGGTCTGCTGT	natural antisense	NM_001173474	ASMTL	N-acetylserotonin O-methyltransferase-like	-	1472031	1521870	351.134	880.908	8.54678	9.69126
ASHG19A3A042008	-2.21067	-1.14448	2.21067	down	noncoding	NR_026710	NCRNA00105	RefSeq_NR	1789	chrY	+	1469423	1482478		GGGGGCGCATGTAGCTGCACGCCCCTCTGTAATTGCTGAAATAAAAAGATGGTCTGCTGT	natural antisense	NM_004192	ASMTL	N-acetylserotonin O-methyltransferase-like	-	1472031	1521870	351.134	880.908	8.54678	9.69126
ASHG19A3A050664	-2.04803	-1.03423	2.04803	down	noncoding	AK054752		misc_RNA	2151	chr14	-	24893094	24895245		ATGGTATGTGTCCCTTACCAAAATGAAGCTTTTAGAGAAACTGACATATTAGTGATTCAG	intergenic							143.265	329.145	7.24226	8.2765
ASHG19A3A020005	-2.14799	-1.10299	2.14799	down	noncoding	ENST00000398242	LA16c-60H5.7	Ensembl	1049	chr22	+	16122719	16123768	NM_001128917,NM_001128916,ENST00000436000,ENST00000392943,	ATGTCTCTAGCTGGGAAATACACATTGAACAACTGGTTGGCAACGTTAACGTTGAGCCAG	intergenic							338.571	821.907	8.4919	9.59489
ASHG19A3A055082	-2.88553	-1.52884	2.88553	down	noncoding	uc001ihn.3	truncated AKR	UCSC_knowngene	543	chr10	-	4927673	4934216	ENST00000432950,	TGACACAGTGGGTCTCTGCAGCACATGGGAGGCCCTGGAGAAGTGTAAGGATGCAGGATT	intergenic							309.022	1006.86	8.36326	9.89209
ASHG19A3A035994	-4.46744	-2.15945	4.46744	down	noncoding	AK123324		misc_RNA	2568	chr8	-	100967686	100970254		CACTGCTCATCTAAGAAAGTTCAGTGCAATGCTATTCATAAAAATGTGCCATTAGTAGTC	intergenic							6737.65	33105.3	12.7963	14.9557
ASHG19A3A013739	-2.64211	-1.40169	2.64211	down	noncoding	BC035180		misc_RNA	1919	chr2	-	64749323	64751227		CCCATCGTTTAATGTAAAACCTTAATTTTAATTGGCTGCTTAGTAGTCAATGGAATGACC	bidirectional	NM_203437	AFTPH	aftiphilin isoform a	+	64751438	64820138	95.0435	279.926	6.64245	8.04414
ASHG19A3A013739	-2.64211	-1.40169	2.64211	down	noncoding	BC035180		misc_RNA	1919	chr2	-	64749323	64751227		CCCATCGTTTAATGTAAAACCTTAATTTTAATTGGCTGCTTAGTAGTCAATGGAATGACC	bidirectional	NM_001002243	AFTPH	aftiphilin isoform c	+	64751438	64820138	95.0435	279.926	6.64245	8.04414
ASHG19A3A013739	-2.64211	-1.40169	2.64211	down	noncoding	BC035180		misc_RNA	1919	chr2	-	64749323	64751227		CCCATCGTTTAATGTAAAACCTTAATTTTAATTGGCTGCTTAGTAGTCAATGGAATGACC	bidirectional	NM_017657	AFTPH	aftiphilin isoform b	+	64751438	64820138	95.0435	279.926	6.64245	8.04414
ASHG19A3A021268	-2.13364	-1.09332	2.13364	down	noncoding	ENST00000504027	RP11-803B1.1	Ensembl	895	chr3	-	75419598	75420493	ENST00000479200,ENST00000463158,ENST00000445529,ENST00000437705,ENST00000426212,ENST00000416521,	GTTTACTGATTTTATGGAACAGGCTTTGGAGGGTACCTCAGTTCAGATGTGTCATCTTCC	intergenic							157.516	378.699	7.38316	8.47648
ASHG19A3A025271	-2.56407	-1.35844	2.56407	down	noncoding	ENST00000510480	RP11-1396O13.18	Ensembl	949	chr4	+	9470745	9471694	ENST00000463158,ENST00000418098,ENST00000398413,ENST00000344740,	TGTTTGCTGATTTTATGGAACAGGCGTTGGAGGGTATCTCGGTTCAGATGTGTCATCTTC	intergenic							149.831	434.401	7.31257	8.671
ASHG19A3A021162	-2.74972	-1.45929	2.74972	down	noncoding	AF088004		misc_RNA	637	chr3	-	53847126	53847760		GATCAGAGTAAGAATGTCTTAAGAAGAGGTTTGTAAGGTCTTCATAACAAAGTGGTGTTT	intergenic							2244.41	6928.28	11.2222	12.6815
ASHG19A3A037421	-2.36704	-1.24309	2.36704	down	noncoding	ENST00000421857	BX649597.4	Ensembl	1324	chr9	-	43425718	43427042	ENST00000396485,	AGAAGATTGTGTCCTGGCTGGAATATGTCTAGTTTTTCCAATGAGGAAGCACAGAAGGCA	intergenic							1758.3	4664.77	10.8711	12.1142
ASHG19A3A014880	-2.31977	-1.21398	2.31977	down	noncoding	ENST00000405197	AC064836.3	Ensembl	704	chr2	-	203200746	203201450	NM_019013,	CTGTCCCAAGAGCTAGATGAAGCCATTATGGCGGAAGAGAGTGGTGACATCATCTCTCTC	intergenic							247.846	649.945	8.03757	9.25155
ASHG19A3A012607	-2.03265	-1.02336	2.03265	down	noncoding	BC026294		misc_RNA	1697	chr19	+	37323123	37324791		CCCTCACGACACAAAAATCAATTCCAGGTTTATATACCTACATGTGACAGATAAATATAG	intronic antisense	NM_206894	ZNF790	zinc finger protein 790	-	37308330	37329284	291.622	670.623	8.27395	9.29731
ASHG19A3A029164	-3.62113	-1.85644	3.62113	down	noncoding	NR_027109	LOC285593	RefSeq_NR	1412	chr5	+	173006656	173008612		GGGACATTAAAAGGAGGACTTCCACGTTTAATTCTGAATGGTCTATTTTATTTGTGCAAT	intergenic							404.06	1659.39	8.75191	10.6083
ASHG19A3A046092	-2.70238	-1.43423	2.70238	down	noncoding	G65604		misc_RNA	191	chr11	+	6615208	6615399		GATTAGAAATAAAAGATTCATTGATGGGAATCTTTAGGAATAGGGATAACTTCTCCCTGC	intergenic							68.9039	208.54	6.18648	7.62071
ASHG19A3A023478	-3.7285	-1.89859	3.7285	down	noncoding	AK054953		misc_RNA	2228	chr3	+	160981722	160983945		TCTACACATTACAGGTTTTACTGGTTTTAATAGTACTCTGGAAGGTGGCTTGAGGTGGAG	intergenic							88.9241	370.527	6.54508	8.44367
ASHG19A3L0001430	-2.03906	-1.0279	2.03906	down	noncoding	AX747038	lincRNA-BANK1-2	lincRNA	3544	chr4	+	102341117	102995967	NM_017935,NM_001127507,NM_001083907,	CAGAGTTCCAGTCATTATTGTTACATCATGTTTGCAGAAACCTTGTCTTATTTAGTGTCT	exon sense-overlapping	NM_001127507	BANK1	B-cell scaffold protein with ankyrin repeats	+	102711763	102995969	237.672	548.098	7.97366	9.00157
ASHG19A3L0001430	-2.03906	-1.0279	2.03906	down	noncoding	AX747038	lincRNA-BANK1-2	lincRNA	3544	chr4	+	102341117	102995967	NM_017935,NM_001127507,NM_001083907,	CAGAGTTCCAGTCATTATTGTTACATCATGTTTGCAGAAACCTTGTCTTATTTAGTGTCT	exon sense-overlapping	NM_017935	BANK1	B-cell scaffold protein with ankyrin repeats	+	102711763	102995969	237.672	548.098	7.97366	9.00157
ASHG19A3L0001430	-2.03906	-1.0279	2.03906	down	noncoding	AX747038	lincRNA-BANK1-2	lincRNA	3544	chr4	+	102341117	102995967	NM_017935,NM_001127507,NM_001083907,	CAGAGTTCCAGTCATTATTGTTACATCATGTTTGCAGAAACCTTGTCTTATTTAGTGTCT	exon sense-overlapping	NM_001083907	BANK1	B-cell scaffold protein with ankyrin repeats	+	102734982	102995969	237.672	548.098	7.97366	9.00157
ASHG19A3A041781	-2.19273	-1.13273	2.19273	down	noncoding	AK095886		misc_RNA	2394	chrX	+	154354849	154357244		AATTTGATGGGGTGGCCTATGCTCCTGAGAATTCTTAGCTAGCTATTTGAAAAGTGAGGG	intergenic							140.936	348.524	7.21954	8.35227
ASHG19A3A013499	-2.14133	-1.0985	2.14133	down	noncoding	ENST00000426536	RP11-690C23.3	Ensembl	280	chr1	-	246691863	246692143		CCTCCTCAAATCTGGCTCTTTATTGATACCATTCCTACAAAGAGGCATCACGGTTCGTCA	intergenic							101.785	243.405	6.74374	7.84224
ASHG19A3A047701	-2.32694	-1.21844	2.32694	down	noncoding	BC001489		misc_RNA	1339	chr12	-	56805728	56807039		TTTTTGGCAAGCTGTATATGTGGTGTTCAGAATCCAAAATAAACATCACCTGATATCCAC	intergenic							196.84	518.639	7.70367	8.92211
ASHG19A3A017655	-2.40157	-1.26398	2.40157	down	noncoding	uc002xig.3	LOC388796	UCSC_knowngene	2149	chr20	-	37049238	37063962		CTTTCTGTTAGGATTTTTTATTTGGTGTGCGTGAATGAGGAGCTTCGCCCTGCTTGAATG	intergenic							188.496	513.008	7.64012	8.90409
ASHG19A3A041002	-2.81476	-1.49301	2.81476	down	noncoding	BC007286		NRED	1257	chr1	+	227848938	227850161	NR_033184,NM_178549,	TTCTGTTTGGAAAGAATACACAGAGCAAGATGATTTACAATAAACCTTTTGACCTAACGC	exon sense-overlapping	NM_178549	ZNF678	zinc finger protein 678	+	227751219	227850164	505.619	1617.72	9.07939	10.5724
ASHG19A3A016424	-2.28882	-1.19461	2.28882	down	noncoding	ENST00000453636	AC092620.3	Ensembl	680	chr2	+	139362079	139370737		GTGGAACTGTATTCTCTAATCAATATTAGCACATACATATTGCCCCAGACTGTACCTCCT	intergenic							108.512	278.18	6.8414	8.036
ASHG19A3A024489	-2.20149	-1.13848	2.20149	down	noncoding	ENST00000508114	RP11-562F9.1	Ensembl	1576	chr4	-	93103627	93105203		AGAAATGGTAGAAATCACCACAAAGGAGTTTATTTTAATGGGCGGAACCGTGGACGCGGT	intergenic							349.677	872.243	8.53991	9.67839
ASHG19A3A034165	-2.02282	-1.01637	2.02282	down	noncoding	uc003tcz.1	AK127989	UCSC_knowngene	3639	chr7	+	32798897	32802536		GTCTGAAGAACTTCCCGTGATTTAATTCTTTTCTTCGAGTTTAGTCTTAGCTTTGACATT	intergenic							416.533	956.829	8.79655	9.81292
ASHG19A3A023476	-3.05698	-1.61211	3.05698	down	noncoding	AK092378		RNAdb	3256	chr3	+	160793431	160796687	uc003fdu.2,	CTATCTCTGATCCTGTGGTGTTGTATAAAAATGAACAGCTAAAAATTTACCCATGACAAG	intergenic							743.628	2577.92	9.62945	11.2416
ASHG19A3A042290	-4.70823	-2.23518	4.70823	down	noncoding	ENST00000433897	RP11-397A15.4	Ensembl	105	chr1	+	246981377	246981482	NM_001135248,NM_001135247,	TGTCGGGACAAGTTCTCCAAATGTGGCGTGATGGCCAGCAGCGGCCTGTGCCAATCCGTG	intergenic							73.7216	389.874	6.28135	8.51654
ASHG19A3A032180	-2.08187	-1.05788	2.08187	down	noncoding	ENST00000401504	RP11-361F15.3	Ensembl	1317	chr6	+	147728023	147729340		ATGACTTCCTGAACAACGTGGATGAGATGGATACAGGTGATACTATCAACCAAAGCACCT	intergenic							275.835	649.699	8.19308	9.25096
ASHG19A3A045996	-2.97526	-1.57301	2.97526	down	noncoding	NR_024627	KCNQ1DN	RefSeq_NR	1109	chr11	+	2891262	2893333		TTCTTGAACTTTTCCACCAAGGATGTTGCTGCTGTTTGTAGCGTCGGATCCTGGAAAATC	intergenic							69.4475	231.662	6.19696	7.76997
ASHG19A3L0003390	-2.74134	-1.45488	2.74134	down	noncoding	CR627150		misc_RNA	3251	chr5	-	117686667	117897812		GTGATGTTCAATCTCTGTAAAGCTGTGTAATGGGGGATAAACATTAAAGTTGTTTCACAT	intergenic							67.306	206.525	6.15108	7.60596
ASHG19A3A014844	-2.26588	-1.18007	2.26588	down	noncoding	NR_027856	CLK1	RefSeq_NR	3333	chr2	-	201717731	201729467		TGAATTTCGTATTCTGCCCTGAATTCACTCGGGTATATTGATTGGCTGGATGATCTTGGT	exon sense-overlapping	NM_004071	CLK1	dual specificity protein kinase CLK1 isoform 1	-	201717731	201729467	311.359	798.029	8.37339	9.55346
ASHG19A3A014844	-2.26588	-1.18007	2.26588	down	noncoding	NR_027856	CLK1	RefSeq_NR	3333	chr2	-	201717731	201729467		TGAATTTCGTATTCTGCCCTGAATTCACTCGGGTATATTGATTGGCTGGATGATCTTGGT	exon sense-overlapping	NM_001162407	CLK1	dual specificity protein kinase CLK1 isoform 2	-	201717731	201729284	311.359	798.029	8.37339	9.55346
ASHG19A3A027982	-2.32387	-1.21653	2.32387	down	noncoding	AK125648		NRED	3751	chr5	+	14611947	14615694	NM_019018,	TGTGCCTTATCATTTGTCAGCAAACTTACTGGGCCAAACACAAATGGCTGAGACACTCCT	exon sense-overlapping	NM_019018	FAM105A	hypothetical protein LOC54491	+	14581890	14616287	66.4286	172.84	6.13285	7.34938
ASHG19A3A032359	-2.26339	-1.17848	2.26339	down	noncoding	AJ420589		misc_RNA	1540	chr6	+	170714645	170716159		TGCCACAAGTGAATGGCACGTTTGTTCCTCTTTATCTCTGAGCATTGAAGGACTTTTGGT	intergenic							547.897	1411.14	9.19477	10.3733
ASHG19A3A021650	-2.05838	-1.04151	2.05838	down	noncoding	G43503		misc_RNA	130	chr3	-	137964381	137964511		GAACAATATACAATAGAGATTTGAATTTCTCAATAGCATTGGAAGGTATTTCCATAAATA	natural antisense	NM_014154	ARMC8	armadillo repeat-containing protein 8 isoform 1	+	137906147	137965729	484.495	1131.75	9.01734	10.0588
ASHG19A3A021650	-2.05838	-1.04151	2.05838	down	noncoding	G43503		misc_RNA	130	chr3	-	137964381	137964511		GAACAATATACAATAGAGATTTGAATTTCTCAATAGCATTGGAAGGTATTTCCATAAATA	natural antisense	NM_213654	ARMC8	armadillo repeat-containing protein 8 isoform 3	+	137906147	137965729	484.495	1131.75	9.01734	10.0588
ASHG19A3A021650	-2.05838	-1.04151	2.05838	down	noncoding	G43503		misc_RNA	130	chr3	-	137964381	137964511		GAACAATATACAATAGAGATTTGAATTTCTCAATAGCATTGGAAGGTATTTCCATAAATA	intronic antisense	NM_015396	ARMC8	armadillo repeat-containing protein 8 isoform 2	+	137906147	138016219	484.495	1131.75	9.01734	10.0588
ASHG19A3A014641	-2.00139	-1.001	2.00139	down	noncoding	AK023489		misc_RNA	1772	chr2	-	174765506	174767283		AACTGTTTCCCTGCTGTTCATTTTATCCAACGGCTGGGGATATAGGCTACTGCACATGAT	intergenic							172.665	389.846	7.51544	8.51644
ASHG19A3A052321	-2.19102	-1.1316	2.19102	down	noncoding	NR_026808	C15orf28	RefSeq_NR	3281	chr15	-	69096159	69099440		CTTCTCTGTTATAAAATCTGCTACATTTCTTTTCCTGGGAAAGCGAAATAGATTATGCCA	intron sense-overlapping	NM_006305	ANP32A	acidic leucine-rich nuclear phosphoprotein 32	-	69070874	69113261	253.057	628.515	8.06745	9.19905
ASHG19A3A018219	-2.55739	-1.35467	2.55739	down	noncoding	ENST00000417727	SOCS2P1	Ensembl	557	chr20	+	31775196	31776098		AAGTATGGTTTCATCTGATTGACTGCTATGTTCAGATGTGTAAGGATGAGCAGACGGGTG	intergenic							146.237	422.434	7.27416	8.62883
ASHG19A3A049853	-2.79484	-1.48276	2.79484	down	noncoding	AK125472		misc_RNA	3590	chr13	-	113257141	113260731		ACACCAGACTATAATGCAGGTCTTGCTTTGGGAATATTTACATGGTAATCTTATAGTCAC	intergenic							726.649	2298.65	9.59361	11.0764
ASHG19A3A007690	-2.397	-1.26123	2.397	down	noncoding	NR_029415	SHMT2	RefSeq_NR	2097	chr12	+	57624110	57628717		ATCTTCTTCGAGTCTATGCCCTATAAGCTCAACGGCTTTAGCTGTTTGTGTGTCTGTCCA	natural antisense	NM_020142	NDUFA4L2	NADH dehydrogenase [ubiquinone] 1 alpha	-	57628685	57634475	277.343	751.999	8.20299	9.46422
ASHG19A3A007690	-2.397	-1.26123	2.397	down	noncoding	NR_029415	SHMT2	RefSeq_NR	2097	chr12	+	57624110	57628717		ATCTTCTTCGAGTCTATGCCCTATAAGCTCAACGGCTTTAGCTGTTTGTGTGTCTGTCCA	exon sense-overlapping	NM_005412	SHMT2	"serine hydroxymethyltransferase, mitochondrial"	+	57623355	57628718	277.343	751.999	8.20299	9.46422
ASHG19A3A007690	-2.397	-1.26123	2.397	down	noncoding	NR_029415	SHMT2	RefSeq_NR	2097	chr12	+	57624110	57628717		ATCTTCTTCGAGTCTATGCCCTATAAGCTCAACGGCTTTAGCTGTTTGTGTGTCTGTCCA	exon sense-overlapping	NM_001166359	SHMT2	"serine hydroxymethyltransferase, mitochondrial"	+	57624110	57628718	277.343	751.999	8.20299	9.46422
ASHG19A3A007690	-2.397	-1.26123	2.397	down	noncoding	NR_029415	SHMT2	RefSeq_NR	2097	chr12	+	57624110	57628717		ATCTTCTTCGAGTCTATGCCCTATAAGCTCAACGGCTTTAGCTGTTTGTGTGTCTGTCCA	exon sense-overlapping	NM_001166357	SHMT2	"serine hydroxymethyltransferase, mitochondrial"	+	57624142	57628718	277.343	751.999	8.20299	9.46422
ASHG19A3A007690	-2.397	-1.26123	2.397	down	noncoding	NR_029415	SHMT2	RefSeq_NR	2097	chr12	+	57624110	57628717		ATCTTCTTCGAGTCTATGCCCTATAAGCTCAACGGCTTTAGCTGTTTGTGTGTCTGTCCA	exon sense-overlapping	NM_001166358	SHMT2	"serine hydroxymethyltransferase, mitochondrial"	+	57623827	57628718	277.343	751.999	8.20299	9.46422
ASHG19A3A007690	-2.397	-1.26123	2.397	down	noncoding	NR_029415	SHMT2	RefSeq_NR	2097	chr12	+	57624110	57628717		ATCTTCTTCGAGTCTATGCCCTATAAGCTCAACGGCTTTAGCTGTTTGTGTGTCTGTCCA	exon sense-overlapping	NM_001166356	SHMT2	"serine hydroxymethyltransferase, mitochondrial"	+	57623355	57628718	277.343	751.999	8.20299	9.46422
ASHG19A3A050483	-3.18885	-1.67304	3.18885	down	noncoding	AF131777		NRED	1995	chr13	+	111552426	111554396		TTAACAACCGGAAAATAGCCAAGACCAGACAAGTCTGCTGTGGGGACAATTAGATAAAAG	intronic antisense	NM_017664	ANKRD10	ankyrin repeat domain-containing protein 10	-	111530886	111567416	71.8532	256.043	6.2455	7.91854
ASHG19A3L0000844	-2.50999	-1.32768	2.50999	down	noncoding	BC009210	lincRNA-KIAA1199	lincRNA	2959	chr15	-	81239669	81282169		GAGGGTGAGACTAAGCCACTTTTCTTATGATACTTTTGTTGAATAAAGGGCCACTTTCCA	exon sense-overlapping	NM_015154	MESDC2	LDLR chaperone MESD	-	81268094	81282205	341.817	970.14	8.50612	9.8338
ASHG19A3L0000844	-2.50999	-1.32768	2.50999	down	noncoding	BC009210	lincRNA-KIAA1199	lincRNA	2959	chr15	-	81239669	81282169		GAGGGTGAGACTAAGCCACTTTTCTTATGATACTTTTGTTGAATAAAGGGCCACTTTCCA	natural antisense	NM_018689	KIAA1199	KIAA1199 precursor	+	81071711	81243999	341.817	970.14	8.50612	9.8338
ASHG19A3A044135	-2.11332	-1.07951	2.11332	down	noncoding	AK130741		misc_RNA	1985	chr10	+	77246999	77248984		AAAGAGTTAGGACATCTCACTGTACAGCAGTCACCCCATTGTGGGCAAAACTATGTCAAC	intergenic							759.874	1814.94	9.65983	10.7393
ASHG19A3A055056	-2.04989	-1.03554	2.04989	down	noncoding	U79272		NRED	1302	chrX	+	67695109	67757119	uc004dwz.2,	GAGCCTTTGTACTTTGCCATCACTGCTAGTAATTTCTTGGTCCTTTTCAATACTCCATTT	exon sense-overlapping	NM_173834	YIPF6	protein YIPF6 isoform A	+	67718623	67757127	2998.44	6870.33	11.6294	12.665
ASHG19A3A055056	-2.04989	-1.03554	2.04989	down	noncoding	U79272		NRED	1302	chrX	+	67695109	67757119	uc004dwz.2,	GAGCCTTTGTACTTTGCCATCACTGCTAGTAATTTCTTGGTCCTTTTCAATACTCCATTT	exon sense-overlapping	NM_001195214	YIPF6	protein YIPF6 isoform B	+	67718623	67757127	2998.44	6870.33	11.6294	12.665
ASHG19A3A034903	-2.11404	-1.08	2.11404	down	noncoding	ENST00000454597	AC007567.1	Ensembl	3625	chr7	+	107986093	107993512		TCAACAGAATAATGGTGGTTAATTTTTCCTGAAAATCAACTTTCATTCCCACTTGGGGGA	intronic antisense	NM_001193583	NRCAM	neuronal cell adhesion molecule isoform E	-	107788070	108096841	376.825	902.93	8.65052	9.73052
ASHG19A3A034903	-2.11404	-1.08	2.11404	down	noncoding	ENST00000454597	AC007567.1	Ensembl	3625	chr7	+	107986093	107993512		TCAACAGAATAATGGTGGTTAATTTTTCCTGAAAATCAACTTTCATTCCCACTTGGGGGA	intronic antisense	NM_001193584	NRCAM	neuronal cell adhesion molecule isoform F	-	107788070	108096841	376.825	902.93	8.65052	9.73052
ASHG19A3A034903	-2.11404	-1.08	2.11404	down	noncoding	ENST00000454597	AC007567.1	Ensembl	3625	chr7	+	107986093	107993512		TCAACAGAATAATGGTGGTTAATTTTTCCTGAAAATCAACTTTCATTCCCACTTGGGGGA	intronic antisense	NM_001193582	NRCAM	neuronal cell adhesion molecule isoform D	-	107788070	108096841	376.825	902.93	8.65052	9.73052
ASHG19A3A034903	-2.11404	-1.08	2.11404	down	noncoding	ENST00000454597	AC007567.1	Ensembl	3625	chr7	+	107986093	107993512		TCAACAGAATAATGGTGGTTAATTTTTCCTGAAAATCAACTTTCATTCCCACTTGGGGGA	intronic antisense	NM_005010	NRCAM	neuronal cell adhesion molecule isoform B	-	107788070	108096841	376.825	902.93	8.65052	9.73052
CUST_173_PI426075208	-2.1996	-1.13724	2.1996	down	noncoding	nc-HOXD11-5+	nc-HOXD11-5	HOX cluster	228	chr2	-	176968692	176968920		ATGAATATTTACAACGGTTCCAGATTTCTCTTCCACCCGCCGGCATCCCGGAAGCCTCCT	intergenic							345.749	862.167	8.52439	9.66163
CUST_628_PI426073487	-2.3982	-1.26195	2.3982	down	noncoding	uc.149-	uc.149	UCR	204	chr4	-	151494192	151494396		ACTTAAAAGGTCAGGTTTCTACAGGCAAGCCTAGTCAAAGCCTAATTGATGAGGAGGGCA	intron sense-overlapping	NM_001199282	LRBA	lipopolysaccharide-responsive and beige-like	-	151185595	151936436	294.214	797.132	8.28868	9.55063
CUST_628_PI426073487	-2.3982	-1.26195	2.3982	down	noncoding	uc.149-	uc.149	UCR	204	chr4	-	151494192	151494396		ACTTAAAAGGTCAGGTTTCTACAGGCAAGCCTAGTCAAAGCCTAATTGATGAGGAGGGCA	intron sense-overlapping	NM_006726	LRBA	lipopolysaccharide-responsive and beige-like	-	151185595	151936649	294.214	797.132	8.28868	9.55063
ASHG19A3A043014	-2.13643	-1.09521	2.13643	down	noncoding	uc009xrv.1	BC128552	UCSC_knowngene	1439	chr10	-	80928942	80930381		ATTATTTATAGGTTCTAGTGCATCAAAGTCCTCCTGGCTCAATCCTTGACCACGCTGGAG	intronic antisense	NM_020338	ZMIZ1	zinc finger MIZ domain-containing protein 1	+	80828791	81076285	127.487	306.693	7.07937	8.17457
ASHG19A3A036706	-2.0924	-1.06516	2.0924	down	noncoding	CR595807		misc_RNA	1249	chr8	+	79516252	79517501		TCTCTGAAGTCATTTGTGAGCTTGTATGACTTTTGTATTTAGCAATGTTGCATGCTCACA	exon sense-overlapping	NM_006823	PKIA	cAMP-dependent protein kinase inhibitor alpha	+	79428335	79517502	509.459	1207.79	9.08893	10.1541
ASHG19A3A036706	-2.0924	-1.06516	2.0924	down	noncoding	CR595807		misc_RNA	1249	chr8	+	79516252	79517501		TCTCTGAAGTCATTTGTGAGCTTGTATGACTTTTGTATTTAGCAATGTTGCATGCTCACA	exon sense-overlapping	NM_181839	PKIA	cAMP-dependent protein kinase inhibitor alpha	+	79428335	79517502	509.459	1207.79	9.08893	10.1541
ASHG19A3A018644	-4.44992	-2.15378	4.44992	down	noncoding	ENST00000449602	AJ006998.2	Ensembl	1000	chr21	-	16742840	16774624		TTGCTATAAAGAGTAGGCAAATGGAAATCTTTCCCCAAAGGGCACACTGGGATTGTTAGG	intergenic							70.5757	353.205	6.21981	8.37359
ASHG19A3L0002708	-2.19292	-1.13285	2.19292	down	noncoding	chr16:74903295-74907270-	lincRNA-FA2H-2	lincRNA	3976	chr16	-	74903295	74907270		CTTAAACATGTAAGTGCTTACACCAAAATGTGCTGTTGGCCTCCGAGGAAAGAAGGAACT	intergenic							130.567	321.955	7.11149	8.24434
ASHG19A3A048533	-7.43709	-2.89474	7.43709	down	noncoding	AF116620		misc_RNA	2270	chr12	+	46752133	46754394		TAAATAGCCAGAGGATTGGAGGAGCTTCCTCACATTAATTTGCTGTAGAGAAAAGAATTT	natural antisense	NM_018976	SLC38A2	sodium-coupled neutral amino acid transporter 2	-	46751970	46766645	235.911	1978.82	7.96441	10.8592
ASHG19A3A039763	-2.94941	-1.56043	2.94941	down	noncoding	ENST00000424288	RP11-169L17.5	Ensembl	719	chrX	-	40691096	40691815	NR_027761,	ATACTGGAATAGCAGATTCTCGCTTACAAGGATGACTTCATGTCAGAAAGGGCAGATCGG	intergenic							85.317	280.519	6.48785	8.04828
ASHG19A3A037656	-2.07526	-1.05329	2.07526	down	noncoding	ENST00000437925	RP11-276H19.4	Ensembl	991	chr9	-	89699075	89700066		TCAATTGGATTTTCTCATCGATATTGTTCTAAGAGATGAACTGAAACCTCCAAAGTGTCA	intergenic							125.58	292.791	7.05652	8.10982
ASHG19A3A041051	-2.2896	-1.1951	2.2896	down	noncoding	AK128277		NRED	3069	chrX	+	54590646	54593720		CTCATTCTGTAAACGGTGTCTTTTTTTCATTATGGGAAAGCTTTATTGACACATTTGTTT	exon sense-overlapping	NM_001184819	GNL3L	guanine nucleotide-binding protein-like 3-like	+	54556643	54593720	88.6415	226.1	6.54034	7.73543
ASHG19A3A041051	-2.2896	-1.1951	2.2896	down	noncoding	AK128277		NRED	3069	chrX	+	54590646	54593720		CTCATTCTGTAAACGGTGTCTTTTTTTCATTATGGGAAAGCTTTATTGACACATTTGTTT	exon sense-overlapping	NM_019067	GNL3L	guanine nucleotide-binding protein-like 3-like	+	54556643	54593720	88.6415	226.1	6.54034	7.73543
ASHG19A3A045618	-2.5489	-1.34988	2.5489	down	noncoding	uc010rul.1	AK124326	UCSC_knowngene	1865	chr11	-	100554892	100558686		TGAGGTTAAGTTCAAGCCTGGTAAGAGATGACTAAACAGAAACCAAGTGTTTCTTCTTGG	natural antisense	NM_152432	ARHGAP42	rho GTPase-activating protein 42	+	100558406	100861656	72.5424	206.949	6.25948	7.60936
ASHG19A3A047644	-2.17209	-1.11908	2.17209	down	noncoding	ENST00000514702	AC012531.14	Ensembl	368	chr12	-	54377734	54379303	nc-HOXC10-127+,	GGGAGCATGTTTGAAAGAAGACAGACCAGTCTATTTTTGTGGTTGTTTTTAAATAAAAGG	natural antisense	NM_017409	HOXC10	homeobox protein Hox-C10	+	54378945	54384062	91.4331	220.786	6.58467	7.70375
ASHG19A3A021666	-2.71491	-1.4409	2.71491	down	noncoding	AF070618		NRED	1211	chr3	-	139072787	139073966		CTCCCAGTAAGCATGAATTGCTTCAGATGTAAAGCTTACATGTGATGAGTAATACTATAA	intronic antisense	NM_020191	MRPS22	"28S ribosomal protein S22, mitochondrial"	+	139062860	139075887	1067.96	3247.3	10.1437	11.5846
ASHG19A3A053355	-2.04501	-1.03211	2.04501	down	noncoding	NR_027242	LOC146336	RefSeq_NR	2948	chr16	-	1114083	1128731		GATTTGTTTGCCTCATCAACTTTTCAATCAATAAAAAAGTGCATTTTGCTCATCGGATGC	intronic antisense	NM_001172560	SSTR5	somatostatin receptor type 5	+	1122755	1131454	94.008	214.062	6.62786	7.65997
ASHG19A3A053355	-2.04501	-1.03211	2.04501	down	noncoding	NR_027242	LOC146336	RefSeq_NR	2948	chr16	-	1114083	1128731		GATTTGTTTGCCTCATCAACTTTTCAATCAATAAAAAAGTGCATTTTGCTCATCGGATGC	bidirectional	NM_001053	SSTR5	somatostatin receptor type 5	+	1128780	1131454	94.008	214.062	6.62786	7.65997
ASHG19A3A050094	-2.80018	-1.48552	2.80018	down	noncoding	NR_002163	OR7E37P	RefSeq_NR	664	chr13	+	42017059	42017723	ENST00000421076,ENST00000419933,	TGTTTGCTGAGTTTATGGAACAGGCGTTGGAGGTTACCTCAGTTCAGATGATGTGTCATC	intergenic							94.6897	295.806	6.63766	8.12317
ASHG19A3A033810	-2.22498	-1.1538	2.22498	down	noncoding	ENST00000447933	AC073871.2	Ensembl	766	chr7	-	156264939	156398458		TTAAAATCCTCAAGAATAAGGAACATAGGCATGTGTCGTAACGGTCTCCACAGTGGGGGA	intergenic							454.499	1146.26	8.92449	10.0783
ASHG19A3A025442	-2.10063	-1.07082	2.10063	down	noncoding	CR620977		misc_RNA	1134	chr4	+	40168294	40169428		GGGAAGATGATGAGTGAACAATAAGCCTTGTAATATACATGGGTATGTATCTTAATGTAC	intergenic							570.407	1357.86	9.24876	10.3196
ASHG19A3A045578	-4.77849	-2.25655	4.77849	down	noncoding	AK002107		misc_RNA	2714	chr1	-	52373627	52376341		ACACAGTAGCAAAAGAGAAGATCTCATTTACAAATATCTATGGTGTTTCCTTGTTCTGTG	exon sense-overlapping	NM_002867	RAB3B	ras-related protein Rab-3B	-	52373627	52456436	99.8512	536.013	6.71659	8.97314
ASHG19A3A008615	-5.93757	-2.56987	5.93757	down	noncoding	uc002ivh.1	AK126318	UCSC_knowngene	4722	chr17	-	56066404	56072211		TCAGAGCTTATGTGCAGAGTTCCAAGCCCCAAAGTTAATCTAGAACCACTCGATAACACC	intergenic							248.036	1660.03	8.03883	10.6087
CUST_172_PI426073487	-2.33237	-1.2218	2.33237	down	noncoding	uc.174+	uc.174	UCR	260	chr5	+	138643653	138643913	NM_199189,NM_018834,	ATAAATTTGACAGTGAGTATGAGAGAATGGGACGTGGTCCTGGCCCCTTACAAGAGAGAT	intron sense-overlapping	NM_001194956	MATR3	matrin-3 isoform b	+	138629438	138667366	625.858	1652.06	9.38026	10.6021
CUST_172_PI426073487	-2.33237	-1.2218	2.33237	down	noncoding	uc.174+	uc.174	UCR	260	chr5	+	138643653	138643913	NM_199189,NM_018834,	ATAAATTTGACAGTGAGTATGAGAGAATGGGACGTGGTCCTGGCCCCTTACAAGAGAGAT	exon sense-overlapping	NM_199189	MATR3	matrin-3 isoform a	+	138609440	138667366	625.858	1652.06	9.38026	10.6021
CUST_172_PI426073487	-2.33237	-1.2218	2.33237	down	noncoding	uc.174+	uc.174	UCR	260	chr5	+	138643653	138643913	NM_199189,NM_018834,	ATAAATTTGACAGTGAGTATGAGAGAATGGGACGTGGTCCTGGCCCCTTACAAGAGAGAT	exon sense-overlapping	NM_018834	MATR3	matrin-3 isoform a	+	138629332	138667366	625.858	1652.06	9.38026	10.6021
CUST_172_PI426073487	-2.33237	-1.2218	2.33237	down	noncoding	uc.174+	uc.174	UCR	260	chr5	+	138643653	138643913	NM_199189,NM_018834,	ATAAATTTGACAGTGAGTATGAGAGAATGGGACGTGGTCCTGGCCCCTTACAAGAGAGAT	exon sense-overlapping	NM_001194954	MATR3	matrin-3 isoform a	+	138609440	138667366	625.858	1652.06	9.38026	10.6021
CUST_172_PI426073487	-2.33237	-1.2218	2.33237	down	noncoding	uc.174+	uc.174	UCR	260	chr5	+	138643653	138643913	NM_199189,NM_018834,	ATAAATTTGACAGTGAGTATGAGAGAATGGGACGTGGTCCTGGCCCCTTACAAGAGAGAT	exon sense-overlapping	NM_001194955	MATR3	matrin-3 isoform a	+	138629438	138667366	625.858	1652.06	9.38026	10.6021
ASHG19A3A016520	-2.32899	-1.2197	2.32899	down	noncoding	ENST00000429684	AC009299.4	Ensembl	717	chr2	+	162138412	162139129		TGTCACACTCTTGCCAGCAGAAGAGGCCCCTGTAATGGCCGATATCACCGCCCAGTCTAT	intergenic							94.3058	245.341	6.63266	7.85236
ASHG19A3A027434	-2.02758	-1.01976	2.02758	down	noncoding	ENST00000504694	AC011431.1	Ensembl	280	chr5	-	135078144	135082167		AAATCTTGGTATTGTTTGGGAAAGGCAGTGTTGGGAAAAGCACATTCAGTGCCCACCTTG	intergenic							296.562	680.84	8.29943	9.31919
ASHG19A3A019300	-3.51278	-1.81261	3.51278	down	noncoding	uc002zau.2	AL355711	UCSC_knowngene	1815	chr21	+	43719103	43720918		GCCAGGCGGGGGAGGCGCAGAGCGTATAAATATAAAGTTAGATACTTATAAAGAATAAAG	intergenic							98.9781	389.227	6.70219	8.51481
ASHG19A3A019842	-2.11926	-1.08356	2.11926	down	noncoding	ENST00000420537	RP1-85F18.5	Ensembl	457	chr22	-	41570594	41593460		CAAACCCTGAGAGGAATTACTCTTCAATTCTCCTGGCTTTCGTTATCAATTATATGATAT	intronic antisense	NM_001429	EP300	histone acetyltransferase p300	+	41488613	41576081	71.7178	170.168	6.2425	7.32606
ASHG19A3A008787	-2.02163	-1.01552	2.02163	down	noncoding	BC002811		NRED	1686	chr17	-	73161681	73163344		CACTGCCATTTTATAGATGAGAAAGCCAAGTTCCAGAAAAGTTGTGAAATAGACGGTGAC	intergenic							665.539	1519.28	9.4683	10.4838
ASHG19A3A041291	-2.02573	-1.01844	2.02573	down	noncoding	ENST00000414579	RP3-347M6.2	Ensembl	1881	chrX	+	100056165	100058046		TGTCAGCTAATACCAGAGTTAGAACTTCTGCCAGAAAAAGAGAATGAGAAAGAAAAGGGG	intergenic							1521.19	3430.69	10.6512	11.6697
ASHG19A3A015841	-2.41191	-1.27017	2.41191	down	noncoding	ENST00000498882	AC073263.1	Ensembl	2915	chr2	+	74378364	74381319		AGGCAAACCTTGGGCATGGGGAGATAAAAGTGAGAAGAGTCAAAAAGATTGATTTCTATA	intergenic							489.107	1341.46	9.03163	10.3018
ASHG19A3A052155	-2.27722	-1.18727	2.27722	down	noncoding	AK129542		misc_RNA	1576	chr15	-	53042222	53043800		CTTCGCTACTGTTCTCACTTTATGCCGTGCAATATCATCTGCTGTGTTTGCTAAGCAAAA	intergenic							156.399	401.982	7.37353	8.56081
ASHG19A3A050543	-7.11637	-2.83114	7.11637	down	noncoding	uc001vvw.1	P775P	UCSC_knowngene	1988	chr14	-	19935902	19970058	uc001vvi.2,	ATGGTGGGTAGAGGAGGGTCTGTTTTTCTTGCCTTTAAGTCACTAATTGTCACTTTGGGG	intergenic							1577.56	12519.5	10.7056	13.5367
ASHG19A3A019069	-2.77468	-1.47232	2.77468	down	noncoding	NR_027790	C21orf34	RefSeq_NR	3475	chr21	+	17442841	17982094		CCTTTGAATTAGCTTTCCCTAGGCCATGAGTCAACATTAGTAGTTTATACATCCAAATTG	intergenic							95.4317	295.357	6.64869	8.12101
ASHG19A3A052430	-2.428	-1.27977	2.428	down	noncoding	NR_026998	LOC91450	RefSeq_NR	1016	chr15	-	78285575	78286567		CCAAGATGAAGTCATGCTGTGCTTTGGAATGGTAGATGCTCATTTATGTAAAATCATAAT	intergenic							99.1788	268.128	6.70573	7.9855
ASHG19A3A046691	-2.35422	-1.23525	2.35422	down	noncoding	NR_024371	FLJ42875	RefSeq_NR	658	chr1	-	2980635	2984289		TCTGCAACGGGGAGCTCCCCCGCCGCTGGGGGCAATAAACGGAATCGGTTTCACACGCTT	intergenic							99.3365	260.845	6.70808	7.94334
ASHG19A3A031863	-2.78671	-1.47856	2.78671	down	noncoding	ENST00000413107	RP11-758C21.1	Ensembl	738	chr6	+	99622619	99623357	NM_020139,	CAAGAAAGAATACAAGCCAGAGGAAATCCTGAAGAGGCACGGAATGATTTCCTGAAGAGA	intergenic							1050.38	3274.96	10.1183	11.5969
ASHG19A3A052196	-2.16281	-1.11291	2.16281	down	noncoding	NR_002927	HSP90AB4P	RefSeq_NR	1518	chr15	-	58983301	58985324		ATCATGTGTGGATCATGGACAGCTTTGATGATTTGATGCCAGAGTATGTCGGCTTTGTCC	intron sense-overlapping	NM_001110	ADAM10	disintegrin and metalloproteinase	-	58888509	59042177	145.819	355.513	7.27057	8.38348
ASHG19A3A015834	-3.03365	-1.60105	3.03365	down	noncoding	AK023768		misc_RNA	4078	chr2	+	74090215	74094293		TGGAGAAGCTCTATGTCACCTTGTAGGAAGCCATCTGAATTTGACTCAGCATCATATGCT	intergenic							73.3122	248.55	6.27349	7.87455
ASHG19A3A040839	-3.31159	-1.72752	3.31159	down	noncoding	ENST00000449263	AL121578.2	Ensembl	710	chrX	+	37765399	37808658		TTCATTCTCTGCGAGGTAGCAGATGTTTTACTGTAGCCTGAGTTGGGATCTTGGAACAAC	intergenic							115.969	432.488	6.9374	8.66492
ASHG19A3A051221	-6.39464	-2.67686	6.39464	down	noncoding	uc001vvi.2	P775P	UCSC_knowngene	2006	chr14	+	19605327	19639483	uc001vvw.1,	ATGGTGGGTAGAGGAGGGTCTGTTTTTCTTGCCTTTAAGTCACTAATTGTCACTTTGGGG	intergenic							1760.79	12609.7	10.8733	13.5501
ASHG19A3A048354	-2.15189	-1.1056	2.15189	down	noncoding	ENST00000442004	AC010186.1	Ensembl	429	chr12	+	9794774	9795203		TATGCCAAGAACATGGGCTTATATTGTGAGCGTGTAGGAGCCTTCACTGTAGTATGCAAA	intergenic							470.645	1146.09	8.97161	10.0772
ASHG19A3A017329	-3.21592	-1.68523	3.21592	down	noncoding	AK026099		misc_RNA	1569	chr20	-	6018021	6019573		GAGGTGTCAATTCTGCCCATGCTCTGGACTATGTTTTTAAAAAACATACAAAAAAGACTG	natural antisense	NM_001127458	CRLS1	cardiolipin synthase isoform 2	+	5987897	6020697	79.0428	284.332	6.38198	8.06721
ASHG19A3A017329	-3.21592	-1.68523	3.21592	down	noncoding	AK026099		misc_RNA	1569	chr20	-	6018021	6019573		GAGGTGTCAATTCTGCCCATGCTCTGGACTATGTTTTTAAAAAACATACAAAAAAGACTG	natural antisense	NM_019095	CRLS1	cardiolipin synthase isoform 1	+	5986738	6020697	79.0428	284.332	6.38198	8.06721
ASHG19A3A045640	-2.00214	-1.00155	2.00214	down	noncoding	uc001phs.2	CASP12	UCSC_knowngene	614	chr11	-	104756441	104758028		GCTCAGCTGTCCACCTTTTCAAATACCAGGCTAAAATCAATCTCATATTTTTGCTAAATT	exon sense-overlapping	NM_001191016	CASP12	inactive caspase-12	-	104756444	104769397	68.0682	152.336	6.16833	7.16988
ASHG19A3A008480	-2.11142	-1.07821	2.11142	down	noncoding	uc002ilc.1	CR602880	UCSC_knowngene	2080	chr17	-	45132466	45177627		TGTGTTTTCTGAAATACAGTCCCGCAGAGGGCAGTCTTGGGAAATTACTGTTCTCACACA	intergenic							178.178	425.59	7.56338	8.64159
ASHG19A3A031098	-2.61136	-1.3848	2.61136	down	noncoding	uc010jqf.1	HFE	UCSC_knowngene	442	chr6	+	26096614	26097056		GCTTCAGGATACCATATACAGCTCAGAAGTTTCTTCTTTAGGCATTAAATTTTAGCAAAG	intergenic							199.433	589.942	7.72395	9.10875
ASHG19A3A042265	-4.32893	-2.11401	4.32893	down	noncoding	ENST00000440148	RP11-278H7.3	Ensembl	567	chr1	+	244270666	244272313		TAAAATATCTGGCAATTATTCTACAGGACATCGATCTAAATCCGCAACTAGCCTGCAAAG	intergenic							75.7635	369.053	6.32231	8.43632
ASHG19A3A047061	-2.26385	-1.17878	2.26385	down	noncoding	ENST00000392776	AP003040.1	Ensembl	1020	chr11	+	122888346	122889372	NR_027288,	AAACGATGTGCTTGACTCACTGGGTATTATTCCTGACCCGCGCTTTATCACGTACTTCTT	intergenic							786.357	2014.75	9.70766	10.8864
ASHG19A3A014425	-2.01574	-1.01131	2.01574	down	noncoding	ENST00000419201	AC023468.2	Ensembl	1315	chr2	-	139659002	139660317		TGATGTGGAAATGGATGTCAAGTGGCTCAACAAGAACACTGTGGAGAAGGTGAACGTCAA	intergenic							135.373	306.442	7.16225	8.17355
ASHG19A3A051568	-2.41026	-1.26919	2.41026	down	noncoding	uc001erc.3	AG10	UCSC_knowngene	3395	chr1	-	148251112	148346929	NM_183372,NM_017940,NM_001101663,NM_001037675,	AACAAACAGCAGTTCGGAAACCTCAAAGAGAGATGTTTTGTAACTCAACTGGCCGGCTTC	intergenic							95.4395	255.963	6.64906	7.91825
ASHG19A3A040158	-3.17765	-1.66796	3.17765	down	noncoding	ENST00000444292	RP5-961K14.1	Ensembl	981	chrX	-	95228332	95229313	NM_007067,	TACTGGAAGGGAAAACACCTAGTTTTAAAGAGACAGGACCTGATTGATGAGTAGATAGCC	intergenic							129.939	466.993	7.10558	8.77354
ASHG19A3A036000	-2.39789	-1.26177	2.39789	down	noncoding	AK026422		misc_RNA	2502	chr1	+	180245084	180247956		TTTGTTTTATTGCCTGCTGCTGAAGGGCTCTGGGCATGCTGAAAGCTAAATGAAAAGCAC	intergenic							90.0749	240.599	6.56246	7.82422
ASHG19A3A015803	-2.52719	-1.33753	2.52719	down	noncoding	ENST00000503990	AC007881.5	Ensembl	598	chr2	+	71265200	71265798	ENST00000463158,ENST00000437705,ENST00000435600,ENST00000426212,	AGTTGTTTGCTGATTTTATGGAACAGGCGTTGGAGGGTACCTCAGTTGAGATGTGTCATC	intergenic							160.104	457.767	7.40834	8.74588
CUST_792_PI426073487	-3.47826	-1.79836	3.47826	down	noncoding	uc.313-	uc.313	UCR	231	chr10	-	121340173	121340404		AGGATCTTGAAGGCTAACTGCAAGGAACTGTGCACACTGGAACTCAGTTGTAGATTTTTT	intron sense-overlapping	NM_001033925	TIAL1	nucleolysin TIAR isoform 2	-	121332977	121356541	147.081	579.561	7.28334	9.0817
CUST_792_PI426073487	-3.47826	-1.79836	3.47826	down	noncoding	uc.313-	uc.313	UCR	231	chr10	-	121340173	121340404		AGGATCTTGAAGGCTAACTGCAAGGAACTGTGCACACTGGAACTCAGTTGTAGATTTTTT	intron sense-overlapping	NM_003252	TIAL1	nucleolysin TIAR isoform 1	-	121332977	121356541	147.081	579.561	7.28334	9.0817
ASHG19A3L0002263	-2.43314	-1.28282	2.43314	down	noncoding	AB002362	lincRNA-IGSF1	lincRNA	5413	chrX	-	130407484	130712873	NM_001170961,	TAACTCCTCACTGTACTGATTTACTGGCGCATGAAATTCTATTAAAAATGCATTCTTCTG	exon sense-overlapping	NM_001170962	IGSF1	immunoglobulin superfamily member 1 isoform 4	-	130407482	130423403	12682.3	33699.3	13.7028	14.9856
ASHG19A3L0002263	-2.43314	-1.28282	2.43314	down	noncoding	AB002362	lincRNA-IGSF1	lincRNA	5413	chrX	-	130407484	130712873	NM_001170961,	TAACTCCTCACTGTACTGATTTACTGGCGCATGAAATTCTATTAAAAATGCATTCTTCTG	intronic antisense	NM_001004486	OR13H1	olfactory receptor 13H1	+	130678047	130678974	12682.3	33699.3	13.7028	14.9856
ASHG19A3L0002263	-2.43314	-1.28282	2.43314	down	noncoding	AB002362	lincRNA-IGSF1	lincRNA	5413	chrX	-	130407484	130712873	NM_001170961,	TAACTCCTCACTGTACTGATTTACTGGCGCATGAAATTCTATTAAAAATGCATTCTTCTG	exon sense-overlapping	NM_001170961	IGSF1	immunoglobulin superfamily member 1 isoform 3	-	130407482	130423403	12682.3	33699.3	13.7028	14.9856
ASHG19A3L0002263	-2.43314	-1.28282	2.43314	down	noncoding	AB002362	lincRNA-IGSF1	lincRNA	5413	chrX	-	130407484	130712873	NM_001170961,	TAACTCCTCACTGTACTGATTTACTGGCGCATGAAATTCTATTAAAAATGCATTCTTCTG	exon sense-overlapping	NM_001170963	IGSF1	immunoglobulin superfamily member 1 isoform 2	-	130418139	130423035	12682.3	33699.3	13.7028	14.9856
ASHG19A3L0002263	-2.43314	-1.28282	2.43314	down	noncoding	AB002362	lincRNA-IGSF1	lincRNA	5413	chrX	-	130407484	130712873	NM_001170961,	TAACTCCTCACTGTACTGATTTACTGGCGCATGAAATTCTATTAAAAATGCATTCTTCTG	exon sense-overlapping	NM_205833	IGSF1	immunoglobulin superfamily member 1 isoform 2	-	130418139	130423403	12682.3	33699.3	13.7028	14.9856
ASHG19A3L0002263	-2.43314	-1.28282	2.43314	down	noncoding	AB002362	lincRNA-IGSF1	lincRNA	5413	chrX	-	130407484	130712873	NM_001170961,	TAACTCCTCACTGTACTGATTTACTGGCGCATGAAATTCTATTAAAAATGCATTCTTCTG	exon sense-overlapping	NM_001555	IGSF1	immunoglobulin superfamily member 1 isoform 1	-	130407482	130423403	12682.3	33699.3	13.7028	14.9856
ASHG19A3A024648	-2.09438	-1.06653	2.09438	down	noncoding	ENST00000507284	RP13-588I20.1	Ensembl	1349	chr4	-	119114559	119115908		GTAGAATATGAGTCTAGTTTTTCCAATGAGGAAACACAGAAGGCACAGGCCCTTCAACTG	intronic antisense	NM_004784	NDST3	bifunctional heparan sulfate	+	118955499	119179789	1255.5	2973.8	10.3821	11.4487
ASHG19A3A034671	-2.54232	-1.34615	2.54232	down	noncoding	AL133090		NRED	3122	chr7	+	87829108	87832202		CTACAACCAGTCTTTTTAAAGGGCAAAAATGACTCAACACCTTTGTTTTGTATGGAAAAC	exon sense-overlapping	NM_021723	ADAM22	disintegrin and metalloproteinase	+	87563565	87832204	95.8764	271.285	6.65513	8.00128
ASHG19A3A034671	-2.54232	-1.34615	2.54232	down	noncoding	AL133090		NRED	3122	chr7	+	87829108	87832202		CTACAACCAGTCTTTTTAAAGGGCAAAAATGACTCAACACCTTTGTTTTGTATGGAAAAC	exon sense-overlapping	NM_021722	ADAM22	disintegrin and metalloproteinase	+	87563565	87832204	95.8764	271.285	6.65513	8.00128
ASHG19A3A034671	-2.54232	-1.34615	2.54232	down	noncoding	AL133090		NRED	3122	chr7	+	87829108	87832202		CTACAACCAGTCTTTTTAAAGGGCAAAAATGACTCAACACCTTTGTTTTGTATGGAAAAC	exon sense-overlapping	NM_016351	ADAM22	disintegrin and metalloproteinase	+	87563565	87832204	95.8764	271.285	6.65513	8.00128
ASHG19A3A032795	-6.87236	-2.78081	6.87236	down	noncoding	ENST00000454877	AC020743.2	Ensembl	767	chr7	-	50181135	50182419		TGAAAGCGAATCAAAAGAAGAAACTTTGCAACCTTGGAGGCCCTCTAGTGCCCAAATCAG	intronic antisense	NM_001161834	C7orf72	hypothetical protein LOC100130988	+	50135681	50198852	101.868	784.303	6.74517	9.52597
ASHG19A3A032571	-2.97505	-1.57291	2.97505	down	noncoding	BC008645		misc_RNA	840	chr7	-	26223684	26224405		CAGTGAAGTAGTCTGGAGGAGAGAGGCTGTTTAAATGCCTCTAAGCGCTAAAACTACAAG	natural antisense	NM_004289	NFE2L3	nuclear factor erythroid 2-related factor 3	+	26191846	26226756	391.417	1320.1	8.70481	10.2777
ASHG19A3A041118	-2.88059	-1.52636	2.88059	down	noncoding	uc004dwz.2	U79272	UCSC_knowngene	4098	chrX	+	67753021	67757119		GAGAATTTCTTGGGGTTTACTTAGGCCACAGAATGGCCAAATAATAATAATGACAATGAT	exon sense-overlapping	NM_173834	YIPF6	protein YIPF6 isoform A	+	67718623	67757127	113.021	366.125	6.89994	8.42631
ASHG19A3A041118	-2.88059	-1.52636	2.88059	down	noncoding	uc004dwz.2	U79272	UCSC_knowngene	4098	chrX	+	67753021	67757119		GAGAATTTCTTGGGGTTTACTTAGGCCACAGAATGGCCAAATAATAATAATGACAATGAT	exon sense-overlapping	NM_001195214	YIPF6	protein YIPF6 isoform B	+	67718623	67757127	113.021	366.125	6.89994	8.42631
ASHG19A3A042758	-2.54338	-1.34675	2.54338	down	noncoding	AK097151		misc_RNA	2331	chr10	-	49858215	49860546		CTAATCTCAAACACTTTGACAACTCTAAAAATGGACTGGCAATGCCATTTCGTGAAAGGC	intergenic							89.5729	253.181	6.55594	7.90269
ASHG19A3A026060	-2.60369	-1.38056	2.60369	down	noncoding	ENST00000515860	RP11-310A13.1	Ensembl	539	chr4	+	139346676	139358023		GTCTCATTTCATGGGAACTACCTCTACTTTCAAATGATCATTTCTTCCCAACATTTCAAT	intergenic							196.02	578.443	7.69797	9.07852
ASHG19A3A019301	-4.99782	-2.3213	4.99782	down	noncoding	AF086547		misc_RNA	334	chr21	+	43724172	43724496		GCGGACTTGAACTTTGTTTTCTGAAATTAGATGCCATTTATGATGATGTGATGTCAATCA	intergenic							276.066	1555.18	8.19541	10.5167
ASHG19A3A031022	-2.04493	-1.03205	2.04493	down	noncoding	ENST00000423260	RP1-151F17.1	Ensembl	491	chr6	+	16761368	16762883		ATCAAATGGCAGTTCTCGAGAATCGACGAGGAACTTAAATCTGGACTCAGGGTTTCAGTG	intronic antisense	NM_001128164	ATXN1	ataxin-1	-	16299342	16761721	96.1367	218.857	6.65957	7.69162
ASHG19A3A031022	-2.04493	-1.03205	2.04493	down	noncoding	ENST00000423260	RP1-151F17.1	Ensembl	491	chr6	+	16761368	16762883		ATCAAATGGCAGTTCTCGAGAATCGACGAGGAACTTAAATCTGGACTCAGGGTTTCAGTG	intronic antisense	NM_000332	ATXN1	ataxin-1	-	16299342	16761721	96.1367	218.857	6.65957	7.69162
ASHG19A3A053033	-2.16065	-1.11147	2.16065	down	noncoding	U79293		NRED	1792	chr15	+	71585488	71587262		CTCGGAAGGTTGTTATTTTAAAAATACTTATTGTTCTCAGTCTGCAGTTCTCACAGCTGT	intron sense-overlapping	NM_024817	THSD4	thrombospondin type-1 domain-containing protein	+	71433787	72075722	12201.4	28803.8	13.6437	14.7552
ASHG19A3A021867	-2.52083	-1.3339	2.52083	down	noncoding	BC037882		misc_RNA	1728	chr3	-	160471218	160472930		CTGAAGATTTGGTGGAAATATGCTTTGACATTTACATCTAAGTGTTCATCCGTGAAAATC	intergenic							76.6478	216.596	6.34171	7.6756
ASHG19A3A020143	-2.83478	-1.50324	2.83478	down	noncoding	uc002zul.3	AK128837	UCSC_knowngene	3280	chr22	+	21537987	21546444	uc002zse.2,uc002znz.1,	TTATTTAAAGGTGGTCTTTCCCAGAACACCTGGCCTTTTCTTTTCTGCCTCTGCCAAACA	intergenic							75.08	238.472	6.30906	7.8123
ASHG19A3A025715	-2.06542	-1.04644	2.06542	down	noncoding	ENST00000401028	RP11-539G11.2	Ensembl	1145	chr1	+	91793925	91795070		TCTTCAGCTAAGTGCAAGGAGCCAGAATCAAAGGGATCCACTAAGAAGAAGGCAAAGACT	intronic antisense	NM_001017975	HFM1	probable ATP-dependent DNA helicase HFM1	-	91726322	91870426	453.562	1059.96	8.92112	9.96756
ASHG19A3A008542	-2.46273	-1.30026	2.46273	down	noncoding	BC037851		misc_RNA	1219	chr17	-	47673109	47674308		TTGCCTGGTAGTAAAAGTGGACACATCCACTTATAACGCTCACTTGAAATAGGGAGAGTT	intergenic							135.06	374.641	7.15935	8.45961
ASHG19A3A014348	-2.38659	-1.25495	2.38659	down	noncoding	ENST00000417310	CYP4F11	Ensembl	524	chr2	-	131196857	131197869	uc002tru.1,NR_030728,NR_026758,NR_023391,	AGACATCGGGAGTGCTGCCAGCCTGTGATGCAAGAGTCCTAATCCTGAAGACATTGAATG	intergenic							87.246	232.172	6.51849	7.77344
ASHG19A3A040598	-2.01179	-1.00848	2.01179	down	noncoding	ENST00000393544	AF277315.8	Ensembl	1065	chrX	-	153850678	153851751	ENST00000438498,	AACTGATCTGAAGGAGTTCGACTTTGATGCCCTGTTGGGTATAGATGACCTGGAAACCAT	intergenic							2455.74	5549.11	11.3491	12.3576
ASHG19A3A049637	-2.96628	-1.56866	2.96628	down	noncoding	AF070632		NRED	1446	chr1	-	112313294	112315191		AGTCGTGTGCCACTGCTGTACCTGATGTATCCAATCTGGATTAAACAAATTATGTGCCAC	intergenic							110.959	370.115	6.87212	8.44078
ASHG19A3A050269	-2.3182	-1.21301	2.3182	down	noncoding	ENST00000437705	RP11-248N6.2	Ensembl	862	chr13	+	68485218	68486080	ENST00000503990,ENST00000463158,ENST00000445529,ENST00000426212,	TGGTTTGCTGATTTTATGGAACAGGCGTTGGAGGGTACCTCAGTTCAGATGTGTCATCTT	intergenic							216.022	569.282	7.84009	9.0531
ASHG19A3A038593	-2.10979	-1.0771	2.10979	down	noncoding	ENST00000396485	AL590812.1	Ensembl	1363	chr9	+	39631026	39632389		GCCACGCTTGTGTTTGAGGTGGAATTGTTTAAGGAAGAAGATCTGACGGAAGAGGAAGAT	intergenic							86.744	203.907	6.51057	7.58767
ASHG19A3A020010	-2.04902	-1.03493	2.04902	down	noncoding	ENST00000435410	LA16c-59E1.2	Ensembl	822	chr22	+	16333632	16342783		TTAATGCTGATACCACCACTAGCACCGATGCCAATACAACCGCTGTCGCCCTCAATGCAG	intergenic							580.701	1347.71	9.27326	10.3082
ASHG19A3A016344	-2.2107	-1.1445	2.2107	down	noncoding	ENST00000510008	AC068137.8	Ensembl	774	chr2	+	131034756	131035530	ENST00000440206,	AAGCCACCGCCTGATATTGACACTATGTAGATGTAGTATGACTATTCTCATATATTTCTA	intergenic							127.278	317.117	7.0772	8.22171
ASHG19A3A028618	-2.31793	-1.21284	2.31793	down	noncoding	ENST00000413221	NCRNA00219	Ensembl	2969	chr5	+	111496222	111499973		GAGATCCACTTACACTTCTGAAAACGCAAGAACACTTTAGAAATTAACAACACTTAAAGC	natural antisense	NM_022140	EPB41L4A	band 4.1-like protein 4A	-	111498314	111755010	1049.79	2733.52	10.1172	11.3301
ASHG19A3A024448	-2.00127	-1.00092	2.00127	down	noncoding	G36610		misc_RNA	466	chr4	-	85929439	85929905		TCTATTTGCTGACATCTTACTCTCTACTCTGAGTCACCTTTTATACCTAGCAAATAACTA	intergenic							66.9296	149.625	6.14325	7.14417
ASHG19A3A053353	-2.96953	-1.57023	2.96953	down	noncoding	uc002ckm.1	BC098409	UCSC_knowngene	3222	chr16	-	1025760	1030913		GAACGTTCCAGAGACCCATTAGTGCCAAAGGCAAATGAAAACACACCCTGTGAAAATGTC	bidirectional	NM_014587	SOX8	transcription factor SOX-8	+	1031807	1036979	133.49	447.174	7.14227	8.71251
ASHG19A3A012283	-2.57523	-1.3647	2.57523	down	noncoding	ENST00000391861	RP11-108F13.2	Ensembl	903	chr1	-	229824743	229825651	NM_020444,NM_001079685,NM_001079684,	TCAGATAAGTGGAGCCTCTTTGGACCGAGATCCCTTCAGAAGGATGATTCTGGAAGTTTT	intergenic							171.475	500.569	7.50538	8.87008
ASHG19A3A047500	-2.0655	-1.04649	2.0655	down	noncoding	NR_028408	LOC400027	RefSeq_NR	2202	chr12	-	46119502	46121704		CCTGACAAAGTAATGTTAGAGATGTGCTGACAGCTTTACAATAGATATTCTCCAACTAAT	intergenic							1263.11	2958	10.3914	11.4379
ASHG19A3A013149	-2.58405	-1.36964	2.58405	down	noncoding	uc002qqy.1	AK000879	UCSC_knowngene	2730	chr19	+	58513428	58518574		GCTGGAACTGTTCTGTATAAACAAAGGGCAAGGTAATTGCTACATAGATTCTTTTCTTAT	natural antisense	NM_025027	ZNF606	zinc finger protein 606	-	58488440	58514714	103.048	298.189	6.76418	8.13382
ASHG19A3A050541	-2.6308	-1.3955	2.6308	down	noncoding	uc001vvq.1	BC016035	UCSC_knowngene	1169	chr14	-	19856360	19925333		GATGACATGAGAGCAGGTATGGGGTTGTCTGTTAGGAAAGTATAACTTAAAAGTTTATAA	intergenic							5726.48	16806.7	12.567	13.9625
ASHG19A3L0000256	-4.53982	-2.18264	4.53982	down	noncoding	DQ269985	lincRNA-AKR1C3-2	lincRNA	972	chr10	+	5005636	5149693		CAGCCTTGGAAAGGTCACTGAAAAAAGCTCAATTGGACTATGTTGACCTCTATCTTATTC	intronic antisense	NM_001354	AKR1C2	aldo-keto reductase family 1 member C2 isoform	-	5031964	5060207	1676.02	8492.95	10.7963	12.9789
ASHG19A3L0000256	-4.53982	-2.18264	4.53982	down	noncoding	DQ269985	lincRNA-AKR1C3-2	lincRNA	972	chr10	+	5005636	5149693		CAGCCTTGGAAAGGTCACTGAAAAAAGCTCAATTGGACTATGTTGACCTCTATCTTATTC	intronic antisense	NM_001135241	AKR1C2	aldo-keto reductase family 1 member C2 isoform	-	5042102	5046053	1676.02	8492.95	10.7963	12.9789
ASHG19A3L0000256	-4.53982	-2.18264	4.53982	down	noncoding	DQ269985	lincRNA-AKR1C3-2	lincRNA	972	chr10	+	5005636	5149693		CAGCCTTGGAAAGGTCACTGAAAAAAGCTCAATTGGACTATGTTGACCTCTATCTTATTC	exon sense-overlapping	NM_003739	AKR1C3	aldo-keto reductase family 1 member C3	+	5136567	5149878	1676.02	8492.95	10.7963	12.9789
ASHG19A3L0000256	-4.53982	-2.18264	4.53982	down	noncoding	DQ269985	lincRNA-AKR1C3-2	lincRNA	972	chr10	+	5005636	5149693		CAGCCTTGGAAAGGTCACTGAAAAAAGCTCAATTGGACTATGTTGACCTCTATCTTATTC	exon sense-overlapping	NM_001353	AKR1C1	aldo-keto reductase family 1 member C1	+	5005453	5020158	1676.02	8492.95	10.7963	12.9789
ASHG19A3L0000256	-4.53982	-2.18264	4.53982	down	noncoding	DQ269985	lincRNA-AKR1C3-2	lincRNA	972	chr10	+	5005636	5149693		CAGCCTTGGAAAGGTCACTGAAAAAAGCTCAATTGGACTATGTTGACCTCTATCTTATTC	intronic antisense	NM_205845	AKR1C2	aldo-keto reductase family 1 member C2 isoform	-	5031964	5060207	1676.02	8492.95	10.7963	12.9789
ASHG19A3A041314	-2.04479	-1.03195	2.04479	down	noncoding	AF085872		misc_RNA	652	chrX	+	100882857	100883508		GGGGAGAGAAGCACAGAATTGAAACAATGTATACCCTTCCAGACACTTTTACTATTCATA	intergenic							139.292	320.147	7.20394	8.23589
ASHG19A3A051746	-3.51638	-1.81409	3.51638	down	noncoding	NR_023938	C14orf132	RefSeq_NR	7504	chr14	+	96505661	96560133		GACTTCTCTACAGTGAAGACTCTTTCTTAATAAAGGATTTCGCTGTGCTCTTTTGATTAA	intergenic							3213.58	12532.3	11.7247	13.5388
ASHG19A3A042779	-2.23283	-1.15887	2.23283	down	noncoding	NR_029388	LOC728407	RefSeq_NR	1420	chr10	-	51253908	51371316	uc010qhh.1,NM_003631,ENST00000456092,	TTGACACGATTGCATGTCACTTACGAAGGTACCATAGAAGAAAATGGCCGAGGCATGCTA	exon sense-overlapping	NM_003631	PARG	poly(ADP-ribose) glycohydrolase	-	51026324	51371331	97.846	243.678	6.68476	7.84363
ASHG19A3A039641	-2.1008	-1.07094	2.1008	down	noncoding	ENST00000398108	RP11-2K15.2	Ensembl	534	chrX	-	17117904	17118440	NM_006807,NM_001127228,	AAAGTGGAAGGGATTCTCAGATGAGGACAACACATGGGAGTCAGAAGAGAACTTGGATTG	intronic antisense	NM_004726	REPS2	ralBP1-associated Eps domain-containing protein	+	16964813	17171403	157.347	372.994	7.38205	8.45299
ASHG19A3A039641	-2.1008	-1.07094	2.1008	down	noncoding	ENST00000398108	RP11-2K15.2	Ensembl	534	chrX	-	17117904	17118440	NM_006807,NM_001127228,	AAAGTGGAAGGGATTCTCAGATGAGGACAACACATGGGAGTCAGAAGAGAACTTGGATTG	intronic antisense	NM_001080975	REPS2	ralBP1-associated Eps domain-containing protein	+	16964813	17171403	157.347	372.994	7.38205	8.45299
ASHG19A3L0000746	-2.33622	-1.22418	2.33622	down	noncoding	AK296158	lincRNA-TMEM30B-1	lincRNA	1756	chr14	+	61654286	62016579	NM_006255,	AAACTTTTCCTATGTGTCTCCAGAATTGCAACCATAGCCTTATGGGGAGTGAGAGAGAGG	exon sense-overlapping	NM_006255	PRKCH	protein kinase C eta type	+	61788514	62017698	480.505	1275.04	9.00494	10.2291
ASHG19A3L0000746	-2.33622	-1.22418	2.33622	down	noncoding	AK296158	lincRNA-TMEM30B-1	lincRNA	1756	chr14	+	61654286	62016579	NM_006255,	AAACTTTTCCTATGTGTCTCCAGAATTGCAACCATAGCCTTATGGGGAGTGAGAGAGAGG	intronic antisense	NM_001017970	TMEM30B	cell cycle control protein 50B	-	61744088	61748530	480.505	1275.04	9.00494	10.2291
ASHG19A3A048395	-5.57725	-2.47955	5.57725	down	noncoding	uc001rbb.3	TVAS4	UCSC_knowngene	2740	chr12	+	13068125	13070865	BC042436,	TTGTAGATTGCTCTCTTTGGAAATTCTGTGGCCCAACCTCGTGGCTGTTTTCTGGAATTC	intergenic							1877.47	11756.2	10.9665	13.4461
ASHG19A3A055231	-2.04928	-1.03512	2.04928	down	noncoding	uc003skf.1	AK090593	UCSC_knowngene	1974	chr7	+	1200127	1205594	ENST00000423008,	tcttgcaatcaagaaactaCGTGTggccagGATCTCATCCACTATCACAGTTTCAGCTTT	bidirectional	NM_182491	ZFAND2A	AN1-type zinc finger protein 2A	-	1192542	1199855	70.7632	162.08	6.22342	7.25853
ASHG19A3A022127	-2.73533	-1.45171	2.73533	down	noncoding	uc011bsy.1	BC044310	UCSC_knowngene	1505	chr3	-	195370804	195372309	uc011buh.1,	CATGAAATTCAGCAGTCAAGAAATCTGCAGCGGAAGTAAATGAATAAACGTTTTGTTTTC	intergenic							321.071	989.694	8.41563	9.86735
ASHG19A3A043409	-2.10046	-1.0707	2.10046	down	noncoding	AK024129		NRED	4153	chr10	-	126775661	126779173		TTTCCTGGCAGGTGTGGACATTCGTCCTCATGGATGTCTTCTTTATAATAACCTGTGGAG	intron sense-overlapping	NM_001329	CTBP2	C-terminal-binding protein 2 isoform 1	-	126676417	126849103	111.93	262.978	6.88522	7.95592
ASHG19A3A043409	-2.10046	-1.0707	2.10046	down	noncoding	AK024129		NRED	4153	chr10	-	126775661	126779173		TTTCCTGGCAGGTGTGGACATTCGTCCTCATGGATGTCTTCTTTATAATAACCTGTGGAG	intron sense-overlapping	NM_001083914	CTBP2	C-terminal-binding protein 2 isoform 1	-	126676417	126849624	111.93	262.978	6.88522	7.95592
ASHG19A3A014346	-5.76022	-2.52613	5.76022	down	noncoding	uc002trf.1	AK054990	UCSC_knowngene	2070	chr2	-	131174327	131185559		GGCATAAGTCTACTCACTTATATCTGTTTGTCTGGAACATAACCCATGTTTGTTTTTACA	intergenic							677.997	4365.05	9.49256	12.0187
ASHG19A3A023384	-2.03318	-1.02374	2.03318	down	noncoding	AK123861		misc_RNA	2959	chr3	+	150181244	150184205		TGGAAGCTATGAAGCTATATACCCTGTCCATTTGAAAATGCACATAAGCAAAGAACTTTA	intergenic							78.8543	179.46	6.3788	7.40254
ASHG19A3L0001311	-2.01017	-1.00732	2.01017	down	noncoding	DA444159	lincRNA-SLCO2A1	lincRNA	593	chr3	-	133847907	133877108	NM_001005861,	TACAGTGCCTAACAGAGTTTCATGCAGCCCTGGGGGCCTACGTCTGACTCCTCTCCAATC	exon sense-overlapping	NM_001005861	RYK	tyrosine-protein kinase RYK isoform 1	-	133875977	133969586	1347.32	3045.55	10.4807	11.4881
ASHG19A3L0001311	-2.01017	-1.00732	2.01017	down	noncoding	DA444159	lincRNA-SLCO2A1	lincRNA	593	chr3	-	133847907	133877108	NM_001005861,	TACAGTGCCTAACAGAGTTTCATGCAGCCCTGGGGGCCTACGTCTGACTCCTCTCCAATC	exon sense-overlapping	NM_002958	RYK	tyrosine-protein kinase RYK isoform 2	-	133875977	133969586	1347.32	3045.55	10.4807	11.4881
ASHG19A3A009605	-2.05081	-1.0362	2.05081	down	noncoding	HIT000387209_03		H-invDB	251	chr17	+	43592144	43592395	uc010wkl.1,BC065911,	ATGCTCTTGGCTGAACGAAGGCTTGGTGTAGATGGCGTTTCCCGCTAACTTCTCAGGCCC	intergenic							247.708	575.712	8.03639	9.07259
ASHG19A3A037247	-2.76991	-1.46984	2.76991	down	noncoding	ENST00000418613	RP11-448G4.3	Ensembl	1370	chr1	+	197657889	197659765		TTCTTGAAATCTAGTGATGCTGCCATCGTTCAGATGGTTGCTGGAGTGTTGAGAGCTTCT	intronic antisense	NM_144977	DENND1B	DENN domain-containing protein 1B isoform 2	-	197521384	197744623	65.4976	203.148	6.11287	7.58271
ASHG19A3A037247	-2.76991	-1.46984	2.76991	down	noncoding	ENST00000418613	RP11-448G4.3	Ensembl	1370	chr1	+	197657889	197659765		TTCTTGAAATCTAGTGATGCTGCCATCGTTCAGATGGTTGCTGGAGTGTTGAGAGCTTCT	intronic antisense	NM_001195215	DENND1B	DENN domain-containing protein 1B isoform 3	-	197473878	197744623	65.4976	203.148	6.11287	7.58271
ASHG19A3A019408	-2.63454	-1.39755	2.63454	down	noncoding	ENST00000453395	LA16c-83F12.6	Ensembl	624	chr22	-	16199665	16231333		TTAGATGAGAAGCTCTGCTATGCAATCAAGAATCTCAGCCACTCATTTCTGTAGGGGCTG	intergenic							293.585	874.676	8.28515	9.6827
ASHG19A3A040494	-2.36068	-1.23921	2.36068	down	noncoding	ENST00000445173	RP1-203P18.1	Ensembl	988	chrX	-	145701114	145702102	NM_013275,	TCTCCTGGCTCCAGGACGTGGATGACAAGTATGACCGCATGAAGACTTGCCTCCTCATGC	intergenic							250.732	668.899	8.05423	9.29343
ASHG19A3A007236	-2.2119	-1.14529	2.2119	down	noncoding	NR_024122	PBX3	RefSeq_NR	2669	chr9	+	128509616	128729653	NR_024123,	GTCCTGTGTGAGATCAAAGAGAAAACAGGCATGTAATGAATTTACTACACATGTGATGAA	exon sense-overlapping	NM_006195	PBX3	pre-B-cell leukemia transcription factor 3	+	128509616	128729655	84.1312	207.691	6.4694	7.61469
ASHG19A3A007236	-2.2119	-1.14529	2.2119	down	noncoding	NR_024122	PBX3	RefSeq_NR	2669	chr9	+	128509616	128729653	NR_024123,	GTCCTGTGTGAGATCAAAGAGAAAACAGGCATGTAATGAATTTACTACACATGTGATGAA	exon sense-overlapping	NM_001134778	PBX3	pre-B-cell leukemia transcription factor 3	+	128510477	128729655	84.1312	207.691	6.4694	7.61469
ASHG19A3A038133	-2.05139	-1.0366	2.05139	down	noncoding	ENST00000415423	RP11-334J6.6	Ensembl	473	chr9	-	134391944	134397616		GCATCGGTTCCCTGTGAAAACATCTGTGACTTTATGTACGAATAAAACTTATGTAACTTT	natural antisense	NM_007171	POMT1	protein O-mannosyl-transferase 1 isoform a	+	134378288	134399193	401.542	935.476	8.74198	9.77858
ASHG19A3A038133	-2.05139	-1.0366	2.05139	down	noncoding	ENST00000415423	RP11-334J6.6	Ensembl	473	chr9	-	134391944	134397616		GCATCGGTTCCCTGTGAAAACATCTGTGACTTTATGTACGAATAAAACTTATGTAACTTT	natural antisense	NM_001136113	POMT1	protein O-mannosyl-transferase 1 isoform b	+	134378288	134399193	401.542	935.476	8.74198	9.77858
ASHG19A3A038133	-2.05139	-1.0366	2.05139	down	noncoding	ENST00000415423	RP11-334J6.6	Ensembl	473	chr9	-	134391944	134397616		GCATCGGTTCCCTGTGAAAACATCTGTGACTTTATGTACGAATAAAACTTATGTAACTTT	natural antisense	NM_001077365	POMT1	protein O-mannosyl-transferase 1 isoform b	+	134378288	134399193	401.542	935.476	8.74198	9.77858
ASHG19A3A038133	-2.05139	-1.0366	2.05139	down	noncoding	ENST00000415423	RP11-334J6.6	Ensembl	473	chr9	-	134391944	134397616		GCATCGGTTCCCTGTGAAAACATCTGTGACTTTATGTACGAATAAAACTTATGTAACTTT	natural antisense	NM_001077366	POMT1	protein O-mannosyl-transferase 1 isoform c	+	134378288	134399193	401.542	935.476	8.74198	9.77858
ASHG19A3A038133	-2.05139	-1.0366	2.05139	down	noncoding	ENST00000415423	RP11-334J6.6	Ensembl	473	chr9	-	134391944	134397616		GCATCGGTTCCCTGTGAAAACATCTGTGACTTTATGTACGAATAAAACTTATGTAACTTT	natural antisense	NM_001136114	POMT1	protein O-mannosyl-transferase 1 isoform d	+	134378288	134399193	401.542	935.476	8.74198	9.77858
ASHG19A3A032099	-2.11365	-1.07974	2.11365	down	noncoding	AK054852		misc_RNA	2356	chr6	+	134309209	134311566		CCTCCTGCTTATTCCAAAGTGGAAAGCAAAGGCTAACTTACATTTTTCCTTCTTGTGAAA	natural antisense	NM_145176	SLC2A12	"solute carrier family 2, facilitated glucose"	-	134308718	134373789	105.601	249.336	6.79922	7.87895
ASHG19A3A023753	-3.03564	-1.602	3.03564	down	noncoding	NR_003265	SDHAP2	RefSeq_NR	2319	chr3	+	195384909	195415733	NR_003266,NR_003264,NM_004168,	AACATGGAGGAGGACAACTGGAGGTGGCATTTCTATGACACCGTGAAGGGCTCCGACTGG	intergenic							72.9072	247.922	6.26685	7.86885
ASHG19A3A015971	-2.13925	-1.0971	2.13925	down	noncoding	ENST00000445594	AC127391.4	Ensembl	1829	chr2	+	92065994	92068221	ENST00000452851,ENST00000428454,ENST00000426076,	GTGGTCTCGGTGTGATCCATCACTCCGCAAAAATGGAGTGGGCAACATGTTCATAAAAAA	intergenic							2251.35	5416.66	11.2268	12.3239
ASHG19A3A023123	-2.38688	-1.25513	2.38688	down	noncoding	ENST00000463158	GS1-388B5.4	Ensembl	907	chr3	+	125430982	125431889	uc009zme.1,X87825,ENST00000514144,ENST00000505191,ENST00000504027,ENST00000503990,ENST00000479200,ENST00000445529,ENST00000437705,ENST00000435600,ENST00000426212,ENST00000418098,ENST00000416521,ENST00000398413,ENST00000344740,	AGTTGTTTGCTGATTTTATGGAACAGGCGTTGGAGGGTACCTCAGTTCAGATGTGTCATC	intergenic							215.092	582.068	7.83381	9.08893
ASHG19A3A051106	-2.69167	-1.4285	2.69167	down	noncoding	AB007969		NRED	6577	chr14	-	95648275	95654852	NM_024734,	GGGCTTAATTGACTATGTCTGAAAGTTTTTACTGAGAGCTCTAAGAAAACTATTGAGGAA	exon sense-overlapping	NM_024734	CLMN	calmin	-	95648275	95786245	968.173	2949.9	10.0046	11.4331
ASHG19A3A033813	-6.82397	-2.77061	6.82397	down	noncoding	ENST00000430825	AC005534.9	Ensembl	514	chr7	-	156461645	156469257		CAGTTCGCATAGACTTTTCATGCAGTTGAGTCTAATTTATATTTTACTATCCACTTACCC	natural antisense	NM_001184996	RNF32	RING finger protein 32	+	156433440	156469820	455.79	3492.93	8.92708	11.6977
ASHG19A3A033813	-6.82397	-2.77061	6.82397	down	noncoding	ENST00000430825	AC005534.9	Ensembl	514	chr7	-	156461645	156469257		CAGTTCGCATAGACTTTTCATGCAGTTGAGTCTAATTTATATTTTACTATCCACTTACCC	natural antisense	NM_001184997	RNF32	RING finger protein 32	+	156435670	156469820	455.79	3492.93	8.92708	11.6977
ASHG19A3A033813	-6.82397	-2.77061	6.82397	down	noncoding	ENST00000430825	AC005534.9	Ensembl	514	chr7	-	156461645	156469257		CAGTTCGCATAGACTTTTCATGCAGTTGAGTCTAATTTATATTTTACTATCCACTTACCC	natural antisense	NM_030936	RNF32	RING finger protein 32	+	156433352	156469820	455.79	3492.93	8.92708	11.6977
ASHG19A3A032225	-2.15989	-1.11096	2.15989	down	noncoding	ENST00000458194	RP3-398G3.5	Ensembl	385	chr6	+	152723532	152726101		TATAGCAGCAGTTAGCCAGCCTGTCTGTCACTTTTAGGATTCTTTGGGGGATAGAGATCA	intronic antisense	NM_182961	SYNE1	nesprin-1 isoform 1	-	152442818	152958534	72.1366	174.546	6.25202	7.36298
ASHG19A3A032225	-2.15989	-1.11096	2.15989	down	noncoding	ENST00000458194	RP3-398G3.5	Ensembl	385	chr6	+	152723532	152726101		TATAGCAGCAGTTAGCCAGCCTGTCTGTCACTTTTAGGATTCTTTGGGGGATAGAGATCA	intronic antisense	NM_033071	SYNE1	nesprin-1 isoform 2	-	152442818	152957986	72.1366	174.546	6.25202	7.36298
ASHG19A3A053320	-2.28429	-1.19175	2.28429	down	noncoding	AK024448		NRED	4404	chr15	+	102501827	102510657		TGGTGGCTCCAAGAGAGTGCACGGTCCCTGCTGATTGAAAGAAGGATGAAGGGCAGAAGA	intergenic							195.612	506.05	7.69388	8.88563
ASHG19A3A000122	-2.87342	-1.52277	2.87342	down	noncoding	ENST00000417578	RP4-564F22.2	Ensembl	880	chr20	-	37049239	37063920		cctcagcttcctgagtagctgggaccacagGTCTCAGCCTTAGATCCAAGGACAGTCCAA	intergenic							131.378	426.364	7.12098	8.64375
ASHG19A3A013504	-2.41395	-1.2714	2.41395	down	noncoding	AK021572		misc_RNA	1546	chr2	-	37547592	37549138		GGGCAGAAATCTGACAGCTCTTAGGTTTCTTCTATTTGTGTTAATACTGAGACTTTTAAA	intergenic							124.141	337.602	7.03891	8.31031
ASHG19A3A048398	-2.64008	-1.40058	2.64008	down	noncoding	ENST00000500905	AC007688.1	Ensembl	2500	chr12	+	13133563	13136375		GCTGGTCTAAGTGTGAGGATAATTCTATTGCCTCTTGTGAATACTAAACATATTCTGATA	intronic antisense	NM_015987	HEBP1	heme-binding protein 1	-	13127798	13153243	69.2124	204.697	6.19317	7.59375
ASHG19A3A012466	-2.10097	-1.07106	2.10097	down	noncoding	uc002nrb.1	AK131472	UCSC_knowngene	3202	chr19	+	23299776	23332763		GTGTAAAGAAAGTGAAAACCCTATTAATATCTGCTCACATCAACTCAACATCAGAGTTCA	intergenic							171.239	406.374	7.50339	8.57444
ASHG19A3A024278	-10.1146	-3.33836	10.1146	down	noncoding	ENST00000514659	RP11-468N14.8	Ensembl	117	chr4	-	69773635	69773752		GATAACATTACAGAAGAAAAGGCTGATGTGATTGCATCAGCCCTTGCCCAGATCCCACAA	intergenic							112.828	1281.58	6.89745	10.2358
ASHG19A3A051864	-2.37924	-1.2505	2.37924	down	noncoding	uc001yqw.2	BC015572	UCSC_knowngene	2029	chr14	+	105878166	105880195		GTCACAACTGGGATTTGTGTACTAGTTTTCTGTAGCTGCCATAAAAATTGCCACAAATTC	exon sense-overlapping	NM_001195082	TEX22	testis-expressed sequence 22 protein	+	105864919	105880196	135.659	363.07	7.16491	8.41541
ASHG19A3A027638	-2.13795	-1.09623	2.13795	down	noncoding	ENST00000394006	AC008677.2	Ensembl	1128	chr5	-	157413532	157414664		AATTACTTGGTCATCTGGTGCATTGATCTAGAGGTGGTGGAGAAATGTGCACTCATGGAG	intergenic							267.869	648.243	8.15103	9.24726
ASHG19A3A028087	-2.14654	-1.10201	2.14654	down	noncoding	ENST00000506026	CTD-2233C11.3	Ensembl	1064	chr5	+	33502176	33503240		ATACACATTGAACAACTGGTTGGCAACGGTAACGTTGGGTTGGACATAACACCACAAACC	intergenic							194.627	471.928	7.68644	8.78845
ASHG19A3A036709	-2.11177	-1.07845	2.11177	down	noncoding	AK023640		RNAdb	1438	chr8	+	79640607	79642045		ATGCTCCTCAAGCTGAACTTCTTCCATTTGTGATAGTATTTGGACCATTTCTAGAATATG	intergenic							287.301	685.63	8.2533	9.33175
ASHG19A3A032740	-2.04455	-1.03179	2.04455	down	noncoding	uc010kxx.2	RASA4P	UCSC_knowngene	1336	chr7	-	44068485	44078607		GTGATGTGTGTGAAGCACATGAGTGAATTCGCTGAAGGCTCTAAGGAGGCCCGAAAACAC	intergenic							88.3777	201.388	6.53645	7.56823
ASHG19A3A023474	-2.67117	-1.41747	2.67117	down	noncoding	AK055510		misc_RNA	2306	chr3	+	160788987	160791293		GAAGCATGAGCCTTTCATATATGAAGCTGACTTGTTAATAAAAGCAGTGTTAAGAAGTAG	intergenic							106.583	319.124	6.8138	8.23128
ASHG19A3L0000943	-2.68133	-1.42295	2.68133	down	noncoding	BP312547	lincRNA-RBBP8-1	lincRNA	581	chr18	+	20494080	20548814	NM_203292,NM_203291,NM_002894,	AAAGTTTTAGAAGATCGGTTAAGAGCAGGCTTATGTGATCGCTGTGCAGTAACTGAAGAA	exon sense-overlapping	NM_203291	RBBP8	DNA endonuclease RBBP8 isoform a	+	20513838	20606449	79.797	239.593	6.39586	7.8188
ASHG19A3L0000943	-2.68133	-1.42295	2.68133	down	noncoding	BP312547	lincRNA-RBBP8-1	lincRNA	581	chr18	+	20494080	20548814	NM_203292,NM_203291,NM_002894,	AAAGTTTTAGAAGATCGGTTAAGAGCAGGCTTATGTGATCGCTGTGCAGTAACTGAAGAA	exon sense-overlapping	NM_002894	RBBP8	DNA endonuclease RBBP8 isoform a	+	20513294	20606449	79.797	239.593	6.39586	7.8188
ASHG19A3L0000943	-2.68133	-1.42295	2.68133	down	noncoding	BP312547	lincRNA-RBBP8-1	lincRNA	581	chr18	+	20494080	20548814	NM_203292,NM_203291,NM_002894,	AAAGTTTTAGAAGATCGGTTAAGAGCAGGCTTATGTGATCGCTGTGCAGTAACTGAAGAA	exon sense-overlapping	NM_203292	RBBP8	DNA endonuclease RBBP8 isoform b	+	20513838	20606449	79.797	239.593	6.39586	7.8188
ASHG19A3A010397	-2.74924	-1.45903	2.74924	down	noncoding	NR_024484	LOC400657	RefSeq_NR	3474	chr18	-	72259011	72265071		GGGTTAGGGTTAGACTCTGTAATGGGAAGTTATGTGATCAGATTTCTGTTTAGGAAGATC	intergenic							82.4228	252.486	6.4396	7.89863
ASHG19A3A044970	-2.04369	-1.03117	2.04369	down	noncoding	BC032761		NRED	1125	chr11	-	16798843	16799927	uc009ygt.2,	CTCCATATGCTGCCAGTATCGACTTCATGACATTTGCCAAAATAAAATTTTATTTTTGCC	intergenic							5942.62	13528.2	12.6212	13.6524
ASHG19A3A045711	-2.1133	-1.0795	2.1133	down	noncoding	AK127883		misc_RNA	2058	chr11	-	114389670	114391728		GTTGTGGTCTTATAAGAAAAGGAAATCTGGAAATCTTGTCCCTGTTATTAATACACCTGT	intergenic							82.7824	195.221	6.44516	7.52466
ASHG19A3A037682	-2.04906	-1.03496	2.04906	down	noncoding	ENST00000445529	RP11-61N16.1	Ensembl	855	chr9	-	93504807	93505662	ENST00000505191,ENST00000504027,ENST00000503990,ENST00000502808,ENST00000479200,ENST00000463158,ENST00000437705,ENST00000435600,ENST00000426212,ENST00000416521,ENST00000344740,	TGTTTGCTGATTTTATGGAACAGGCATTGGAGGGTACCTCAGTTCAGATGTGTCATCTTC	intergenic							135.7	312.377	7.16544	8.2004
ASHG19A3A041727	-2.6282	-1.39407	2.6282	down	noncoding	ENST00000393835	RP11-66N11.6	Ensembl	372	chrX	+	152871971	152872346		TGGGAGATGGACAATATGCTCTTCCAGATCAAAACCCAGGTGGAGGCTTCGGAGGAGCAT	intergenic							3246.8	9444.93	11.7393	13.1333
ASHG19A3A044293	-2.1628	-1.1129	2.1628	down	noncoding	BC080552		misc_RNA	1476	chr1	-	41972591	41974050		AGTCTGCTTTCCATTAGAAAACCGCTTCGGCACTTATGGTCACTTTAATAAATCTAGTAT	intergenic							453.18	1110.66	8.91989	10.0328
ASHG19A3A044211	-2.14782	-1.10287	2.14782	down	noncoding	uc001kdf.1	AK056561	UCSC_knowngene	2685	chr10	+	86039735	86054415		ATTTCCAAAATGTCAACAACACTTTGGACTATCAACCTGTCTAAAGAGTATTTGAAGCAG	intergenic							66.558	159.642	6.13523	7.2381
CUST_194_PI426075208	-3.19411	-1.67541	3.19411	down	noncoding	nc-HOXD4-31+	nc-HOXD4-31	HOX cluster	108	chr2	-	177010079	177010187		AACTTTGGGGGCTCAAAACTGGGTGGGAGTTTTAGGAGCACTACCCCCACACCCACACTG	intergenic							122.667	442.782	7.02237	8.69779
ASHG19A3A010129	-2.8199	-1.49564	2.8199	down	noncoding	NR_026849	C18orf18	RefSeq_NR	1322	chr18	-	5236723	5238028		AAGGATACTTTGACAGTTTTCATTTGTCGTCTACATGTATATGGTACGTTTCATTCTGCC	intergenic							149.966	478.75	7.31403	8.80968
ASHG19A3A048062	-2.23842	-1.16248	2.23842	down	noncoding	U79257		NRED	1493	chr12	-	117579798	117581280		GCCACGTAGCAATGACTGTATTAGGGCTCTGCTAGTTCTGTAATAAATAGACCCGAAAAG	intergenic							409.21	1036.14	8.77085	9.93332
ASHG19A3A045306	-2.32686	-1.21839	2.32686	down	noncoding	AK096306		NRED	2476	chr11	-	63527368	63529844	NM_001144936,	TGGAAGCAGTGTTTGGTTCTTACTTTACCCAAACTGTGTATAAAGAATAAAGTTAGCAGA	exon sense-overlapping	NM_001144936	C11orf95	hypothetical protein LOC65998	-	63527363	63536113	1031.7	2703.95	10.0945	11.3129
ASHG19A3A020131	-2.01397	-1.01004	2.01397	down	noncoding	ENST00000444039	XXbac-B135H6.15	Ensembl	684	chr22	+	21311379	21318967		TGATTTCTGGAGACCCAAGGAGTTCTGGTAAATGACAGGTGAGAAAAAGAAAATGTAATA	intergenic							370.685	847.688	8.62797	9.63801
ASHG19A3A039734	-2.08892	-1.06276	2.08892	down	noncoding	ENST00000453595	BX842568.2	Ensembl	1230	chrX	-	36980268	36981498	NR_026580,NM_007111,	ATTTTGACAACACATTTGAAATCCAAGGTGACATAGAAGTGCTGAAGCGGATGGGCATGG	intergenic							278.459	658.304	8.20787	9.27063
ASHG19A3A054086	-2.01928	-1.01384	2.01928	down	noncoding	NR_027335	LOC100130015	RefSeq_NR	1369	chr16	-	90106170	90114033		GGAGCACGGCCTTGGAGCCAGCTACCTGCCAGCCAGTAAAACTGTTCTTTTTTATCTCCT	natural antisense	NM_001481	GAS8	growth arrest-specific protein 8	+	90089007	90111379	276.982	635.01	8.2004	9.21424
ASHG19A3A019074	-2.96201	-1.56658	2.96201	down	noncoding	CR601061		misc_RNA	1793	chr21	+	18940620	18942410		CAGTGTCAGTTTCAGATTTTGTATGTACGATTTCTGGCTTATATATCCAATGGTGCAGAT	intergenic							224.161	748.645	7.89082	9.4574
ASHG19A3A025876	-2.81411	-1.49268	2.81411	down	noncoding	ENST00000508555	RP11-713M6.2	Ensembl	557	chr4	+	108179856	108223027		AGATGGAGAGATGTGAATGGATCTGAATGCTACCAAGAAGGTCAAATTCAACGGTGCTTA	intergenic							1489.68	4677.23	10.6255	12.1182
ASHG19A3A031273	-2.08061	-1.05701	2.08061	down	noncoding	NR_026791	HCG27	RefSeq_NR	1742	chr6	+	31165536	31171744		TAAGGTGGTGCTGAAATGAGTCATTTATTTGCCTGTGTAAGCTCAGGCAGGTGTTGGAAT	intergenic							83.537	193.846	6.45804	7.51505
ASHG19A3A023787	-2.77275	-1.47132	2.77275	down	noncoding	uc011buh.1	AK128818	UCSC_knowngene	1514	chr3	+	197369919	197372891	uc011bsy.1,	CTTCTCATGAAATTCAGCAGTCAAGAAATCTGCAGCGGAAGTAAATGAATAAATGTTTTG	intergenic							271.822	851.381	8.17281	9.64412
ASHG19A3A009310	-2.47043	-1.30476	2.47043	down	noncoding	AF086453		misc_RNA	594	chr17	+	26865333	26865917		GCGATGGCTTGTCATTGTCCCCTGTCCTGGAACAATAAAGCAAGTGCCTTGTGGTCTCAC	intergenic							241.11	672.229	7.99551	9.30027
ASHG19A3A040421	-4.90833	-2.29523	4.90833	down	noncoding	uc004exm.2	BC007360	UCSC_knowngene	646	chrX	-	133678458	133680653		TTGCAGTGTGCCTAGATTTTCCTCCAAGGACAAAAATGTGAATAAAGCAATATTTTAGCC	intergenic							138.614	765.378	7.19736	9.49259
ASHG19A3A022162	-2.17803	-1.12302	2.17803	down	noncoding	AK094447		misc_RNA	1714	chr3	-	197232134	197233857		GGCCGGGAAGTGAGAGGCTCGATTCCATCACATGTAAATAAAAATACTCATTTTCAATCT	intergenic							74.0857	180.742	6.28903	7.41205
ASHG19A3A014658	-2.65795	-1.41031	2.65795	down	noncoding	AK022462		misc_RNA	1784	chr2	-	175921561	175923345		ATAATATGGCCCGTCAAGTGTAGCCACAAGAGGAGACACACAGAAAGGATGGGGGTGGGT	intergenic							72.4347	215.333	6.25768	7.66799
ASHG19A3A007156	-2.1085	-1.07621	2.1085	down	noncoding	NR_003610	PDXDC2	RefSeq_NR	4298	chr16	-	70010209	70099851		TGCAAGAAAGCCTCTTTGCAACTGGCTCTGTGCTCAAGCCCTGCAGAGGGAGATGGCAGA	intergenic							93.0741	218.422	6.61308	7.6893
ASHG19A3A017575	-2.20411	-1.14019	2.20411	down	noncoding	ENST00000397772	TPM5P	Ensembl	723	chr20	-	32500128	32501142		GCTGATTGAGAGTGGGAGAGGTAGGAAGGTTATTGAAAATCGAGCCTTAAAAGATGAAGA	intergenic							315.009	786.495	8.39072	9.53092
ASHG19A3A021227	-3.02806	-1.59839	3.02806	down	noncoding	AK022064		NRED	2101	chr3	-	65896550	65898647		CTGGGTTGCTTCTATCAGAAATGGGGAAAATAGATGTTGGATAGCAAAAGTCCACCATGT	intron sense-overlapping	NM_004742	MAGI1	"membrane-associated guanylate kinase, WW and PDZ"	-	65344943	66024509	613.204	2104.85	9.34924	10.9476
ASHG19A3A021227	-3.02806	-1.59839	3.02806	down	noncoding	AK022064		NRED	2101	chr3	-	65896550	65898647		CTGGGTTGCTTCTATCAGAAATGGGGAAAATAGATGTTGGATAGCAAAAGTCCACCATGT	intron sense-overlapping	NM_001033057	MAGI1	"membrane-associated guanylate kinase, WW and PDZ"	-	65339905	66024509	613.204	2104.85	9.34924	10.9476
ASHG19A3A021227	-3.02806	-1.59839	3.02806	down	noncoding	AK022064		NRED	2101	chr3	-	65896550	65898647		CTGGGTTGCTTCTATCAGAAATGGGGAAAATAGATGTTGGATAGCAAAAGTCCACCATGT	intron sense-overlapping	NM_015520	MAGI1	"membrane-associated guanylate kinase, WW and PDZ"	-	65339905	66024509	613.204	2104.85	9.34924	10.9476
ASHG19A3A020451	-2.0708	-1.05019	2.0708	down	noncoding	ENST00000416406	RP3-508I15.14	Ensembl	500	chr22	+	39135007	39145046		CTGGGCAGGTCTTAGAGTGATGGGACAATTTTGACTGAATTTTACTGATGTTATTAAAAA	natural antisense	NM_001199579	SUN2	SUN domain-containing protein 2 isoform a	-	39130718	39152024	97.5119	225.063	6.6786	7.72879
ASHG19A3A020451	-2.0708	-1.05019	2.0708	down	noncoding	ENST00000416406	RP3-508I15.14	Ensembl	500	chr22	+	39135007	39145046		CTGGGCAGGTCTTAGAGTGATGGGACAATTTTGACTGAATTTTACTGATGTTATTAAAAA	natural antisense	NM_001199580	SUN2	SUN domain-containing protein 2 isoform b	-	39130718	39151467	97.5119	225.063	6.6786	7.72879
ASHG19A3A020451	-2.0708	-1.05019	2.0708	down	noncoding	ENST00000416406	RP3-508I15.14	Ensembl	500	chr22	+	39135007	39145046		CTGGGCAGGTCTTAGAGTGATGGGACAATTTTGACTGAATTTTACTGATGTTATTAAAAA	natural antisense	NM_015374	SUN2	SUN domain-containing protein 2 isoform b	-	39130718	39152024	97.5119	225.063	6.6786	7.72879
ASHG19A3A016378	-3.8053	-1.92801	3.8053	down	noncoding	uc002tte.2	BX648270	UCSC_knowngene	4558	chr2	+	132442469	132457434		TTTACTTTTTGTGAACCCTGAGCATACATCCAAGTTGCTCTAAATATACGCACACCCGAG	intergenic							331.445	1427.21	8.46256	10.3906
ASHG19A3A039369	-2.02623	-1.01879	2.02623	down	noncoding	BX537622		misc_RNA	4086	chr9	+	135566270	135570339		GATAACCTTGAATATGTTGTGGTTTGTATACAGAGCCATTAGTATTGTTATTTTGGCCAC	intergenic							10180.3	22925.2	13.3852	14.404
ASHG19A3A013116	-2.21222	-1.14549	2.21222	down	noncoding	ENST00000513382	AC006115.1	Ensembl	5904	chr19	+	57321476	57327470		TAGACTCTGCCATTACTTTTGGTTTACTGGGCCCTGCTACACTGTGACTTTTCTGAGCTT	intronic antisense	NM_015363	ZIM2	zinc finger imprinted 2	-	57285922	57352097	73.9997	182.936	6.28731	7.4328
ASHG19A3A013116	-2.21222	-1.14549	2.21222	down	noncoding	ENST00000513382	AC006115.1	Ensembl	5904	chr19	+	57321476	57327470		TAGACTCTGCCATTACTTTTGGTTTACTGGGCCCTGCTACACTGTGACTTTTCTGAGCTT	intronic antisense	NM_001146326	ZIM2	zinc finger imprinted 2	-	57285922	57352097	73.9997	182.936	6.28731	7.4328
ASHG19A3A013116	-2.21222	-1.14549	2.21222	down	noncoding	ENST00000513382	AC006115.1	Ensembl	5904	chr19	+	57321476	57327470		TAGACTCTGCCATTACTTTTGGTTTACTGGGCCCTGCTACACTGTGACTTTTCTGAGCTT	natural antisense	NM_006210	PEG3	paternally expressed 3 isoform 1	-	57321444	57352094	73.9997	182.936	6.28731	7.4328
ASHG19A3A013116	-2.21222	-1.14549	2.21222	down	noncoding	ENST00000513382	AC006115.1	Ensembl	5904	chr19	+	57321476	57327470		TAGACTCTGCCATTACTTTTGGTTTACTGGGCCCTGCTACACTGTGACTTTTCTGAGCTT	natural antisense	NM_001146184	PEG3	paternally expressed 3 isoform 1	-	57321444	57352094	73.9997	182.936	6.28731	7.4328
ASHG19A3A013116	-2.21222	-1.14549	2.21222	down	noncoding	ENST00000513382	AC006115.1	Ensembl	5904	chr19	+	57321476	57327470		TAGACTCTGCCATTACTTTTGGTTTACTGGGCCCTGCTACACTGTGACTTTTCTGAGCTT	natural antisense	NM_001146187	PEG3	paternally expressed 3 isoform 3	-	57321444	57352094	73.9997	182.936	6.28731	7.4328
ASHG19A3A013116	-2.21222	-1.14549	2.21222	down	noncoding	ENST00000513382	AC006115.1	Ensembl	5904	chr19	+	57321476	57327470		TAGACTCTGCCATTACTTTTGGTTTACTGGGCCCTGCTACACTGTGACTTTTCTGAGCTT	intronic antisense	NM_001146327	ZIM2	zinc finger imprinted 2	-	57285922	57352097	73.9997	182.936	6.28731	7.4328
ASHG19A3A013116	-2.21222	-1.14549	2.21222	down	noncoding	ENST00000513382	AC006115.1	Ensembl	5904	chr19	+	57321476	57327470		TAGACTCTGCCATTACTTTTGGTTTACTGGGCCCTGCTACACTGTGACTTTTCTGAGCTT	natural antisense	NM_001146185	PEG3	paternally expressed 3 isoform 2	-	57321444	57352094	73.9997	182.936	6.28731	7.4328
ASHG19A3A013116	-2.21222	-1.14549	2.21222	down	noncoding	ENST00000513382	AC006115.1	Ensembl	5904	chr19	+	57321476	57327470		TAGACTCTGCCATTACTTTTGGTTTACTGGGCCCTGCTACACTGTGACTTTTCTGAGCTT	natural antisense	NM_001146186	PEG3	paternally expressed 3 isoform 1	-	57321444	57336374	73.9997	182.936	6.28731	7.4328
ASHG19A3A029807	-2.48251	-1.3118	2.48251	down	noncoding	uc003ojj.2	CR624291	UCSC_knowngene	2513	chr6	-	34247456	34249969	AK026168,	TTTGAGCTGTGTGGGAGGGAAGGGCATTGAAATTGTAGGTTGTAATCTTGTGCCAACCAA	intergenic							7941.58	21946	13.0288	14.3405
ASHG19A3A051503	-2.02942	-1.02107	2.02942	down	noncoding	X72726		RNAdb	1252	chr14	+	62213720	62214976	NM_181054,NM_001530,	TCTTTAATGCTGGATCACAGACAGCTCATTTTCTCAGTTTTTTGGTATTTAAACCATTGC	exon sense-overlapping	NM_181054	HIF1A	hypoxia-inducible factor 1-alpha isoform 2	+	62162118	62214977	11585.4	25781.7	13.5682	14.5892
ASHG19A3A051503	-2.02942	-1.02107	2.02942	down	noncoding	X72726		RNAdb	1252	chr14	+	62213720	62214976	NM_181054,NM_001530,	TCTTTAATGCTGGATCACAGACAGCTCATTTTCTCAGTTTTTTGGTATTTAAACCATTGC	exon sense-overlapping	NM_001530	HIF1A	hypoxia-inducible factor 1-alpha isoform 1	+	62162118	62214977	11585.4	25781.7	13.5682	14.5892
ASHG19A3A016946	-2.36094	-1.23936	2.36094	down	noncoding	AK125369		NRED	3146	chr2	+	217081767	217084913		TGTGTCCTTTTATTCATGAATTCTTGCACATTATGAAGAAAGAGTCCATGTGGTCAGTGT	intergenic							163.989	437.058	7.43971	8.67907
ASHG19A3A016376	-3.11197	-1.63783	3.11197	down	noncoding	ENST00000397487	POTEK	Ensembl	2688	chr2	+	132349324	132384839		TATCTTCTCAAGATCTGGACAGACGGCCAGAGAGTATGCTGTTTCTAGTCATCATCATGT	intergenic							417.156	1470.41	8.79936	10.4372
ASHG19A3A021602	-2.93652	-1.55411	2.93652	down	noncoding	AK123415		misc_RNA	2184	chr3	-	131173971	131176155		CTGTGATTGGCCTCACACATAAATAATGAATTCTTTTAGGTTGCTTTAGGAATGTGTTAC	intergenic							85.9666	281.414	6.49839	8.0525
ASHG19A3A018044	-2.24279	-1.16529	2.24279	down	noncoding	ENST00000449270	RP5-839B4.8	Ensembl	1036	chr20	+	9966735	9987764		GGATCTCACGCTTGCTTTGGCCATTTTTGTTATCTTTTATTTAATGGCTGCCACTGTTTT	intergenic							84.0649	210.191	6.46822	7.63352
ASHG19A3A019278	-2.83429	-1.50299	2.83429	down	noncoding	AK023647		misc_RNA	3430	chr21	+	42651025	42654455		CTGACAAATGTCTGAACTATTGTCGTGCCCTTCAAAACTGGAGTTTTCTAAAATAATCTT	intergenic							267.509	856.06	8.14911	9.6521
ASHG19A3A009718	-2.79828	-1.48454	2.79828	down	noncoding	ENST00000419190	RP11-465N4.4	Ensembl	788	chr1	-	201969221	201979481		AACGATATGGACTTGTGCAAATGCAAAGCAATGGTGAAGTCATCACGAACCGCACAGACT	bidirectional	NM_004433	ELF3	ETS-related transcription factor Elf-3	+	201979689	201986315	327.467	1032.62	8.44487	9.92941
ASHG19A3A009718	-2.79828	-1.48454	2.79828	down	noncoding	ENST00000419190	RP11-465N4.4	Ensembl	788	chr1	-	201969221	201979481		AACGATATGGACTTGTGCAAATGCAAAGCAATGGTGAAGTCATCACGAACCGCACAGACT	intronic antisense	NM_020216	RNPEP	aminopeptidase B	+	201951765	201975275	327.467	1032.62	8.44487	9.92941
ASHG19A3A009718	-2.79828	-1.48454	2.79828	down	noncoding	ENST00000419190	RP11-465N4.4	Ensembl	788	chr1	-	201969221	201979481		AACGATATGGACTTGTGCAAATGCAAAGCAATGGTGAAGTCATCACGAACCGCACAGACT	bidirectional	NM_001114309	ELF3	ETS-related transcription factor Elf-3	+	201979689	201986315	327.467	1032.62	8.44487	9.92941
ASHG19A3A015154	-2.31539	-1.21126	2.31539	down	noncoding	uc002vwf.1	AK056246	UCSC_knowngene	2341	chr2	-	237968076	237994460		ATATTTGTGTTTTACATCCCTCACTAGACCCCCAGGAAAGAGGCTTTGATGTGTTGCCTG	natural antisense	NM_006710	COPS8	COP9 signalosome complex subunit 8 isoform 1	+	237994083	238007489	67.1367	173.964	6.14731	7.35857
ASHG19A3A015154	-2.31539	-1.21126	2.31539	down	noncoding	uc002vwf.1	AK056246	UCSC_knowngene	2341	chr2	-	237968076	237994460		ATATTTGTGTTTTACATCCCTCACTAGACCCCCAGGAAAGAGGCTTTGATGTGTTGCCTG	natural antisense	NM_198189	COPS8	COP9 signalosome complex subunit 8 isoform 2	+	237994083	238007489	67.1367	173.964	6.14731	7.35857
ASHG19A3A038991	-2.1047	-1.07361	2.1047	down	noncoding	ENST00000445872	RP11-535M15.2	Ensembl	1278	chr9	+	99488171	99489449	NR_026792,	TTGACAATGATGAAGAGGTTGTCACCTCTTGAGGTGGGCGAGATGTTGCTTATGCTTTTG	intergenic							367.875	882.038	8.61933	9.69295
ASHG19A3A042368	-4.84646	-2.27693	4.84646	down	noncoding	ENST00000432950	RP11-397P14.3	Ensembl	983	chr10	-	4914092	4934167		AACTGGAAATGATCCTCAACAAGCCAGGGCTCAAGCACAAGCCTGTCTGCAACCAGATGA	intergenic							2295.62	12506.3	11.2544	13.5313
ASHG19A3A015089	-2.38319	-1.2529	2.38319	down	noncoding	AK128481		misc_RNA	2218	chr2	-	230629239	230631456		TCTTGATTTTCCACACTGAGGACTGTCGCGAGTAAGTTGTAAGTTTGCCGTCTTCCTTCT	intergenic							1629.8	4339.62	10.7572	12.0101
CUST_478_PI426073487	-2.36589	-1.24238	2.36589	down	noncoding	uc.480+	uc.480	UCR	202	chrX	+	123235271	123235473	NM_006603,NM_001042751,NM_001042750,NM_001042749,	ATTATGAGGTTTCAGAAATATATTGAAAGTTTAACAATGTTTAAAAATAGAAAAGCATGA	exon sense-overlapping	NM_001042750	STAG2	cohesin subunit SA-2 isoform a	+	123095555	123236505	106.228	281.269	6.80908	8.05146
CUST_478_PI426073487	-2.36589	-1.24238	2.36589	down	noncoding	uc.480+	uc.480	UCR	202	chrX	+	123235271	123235473	NM_006603,NM_001042751,NM_001042750,NM_001042749,	ATTATGAGGTTTCAGAAATATATTGAAAGTTTAACAATGTTTAAAAATAGAAAAGCATGA	exon sense-overlapping	NM_001042749	STAG2	cohesin subunit SA-2 isoform a	+	123094474	123236505	106.228	281.269	6.80908	8.05146
CUST_478_PI426073487	-2.36589	-1.24238	2.36589	down	noncoding	uc.480+	uc.480	UCR	202	chrX	+	123235271	123235473	NM_006603,NM_001042751,NM_001042750,NM_001042749,	ATTATGAGGTTTCAGAAATATATTGAAAGTTTAACAATGTTTAAAAATAGAAAAGCATGA	exon sense-overlapping	NM_001042751	STAG2	cohesin subunit SA-2 isoform b	+	123095555	123236505	106.228	281.269	6.80908	8.05146
CUST_478_PI426073487	-2.36589	-1.24238	2.36589	down	noncoding	uc.480+	uc.480	UCR	202	chrX	+	123235271	123235473	NM_006603,NM_001042751,NM_001042750,NM_001042749,	ATTATGAGGTTTCAGAAATATATTGAAAGTTTAACAATGTTTAAAAATAGAAAAGCATGA	exon sense-overlapping	NM_006603	STAG2	cohesin subunit SA-2 isoform b	+	123095555	123236505	106.228	281.269	6.80908	8.05146
ASHG19A3A044136	-2.51624	-1.33127	2.51624	down	noncoding	AK098511		misc_RNA	1934	chr10	+	77289880	77291814		CCCACAAGGAATTTACAGTCCAGCTAGGCCAAAAGGAATTGGCCTTAGAAAGTAATCAGT	intergenic							99.1359	278.245	6.70502	8.03629
ASHG19A3A032865	-2.30699	-1.20601	2.30699	down	noncoding	ENST00000452517	AC073057.5	Ensembl	896	chr7	-	57482533	57483429		AAACTGCCTCATTTCCCCAAGGAAGTCCATCATCTGGAGCCTTATTTTTCTACTCTGTCA	intergenic							105.905	272.957	6.80377	8.00978
ASHG19A3A007952	-2.59799	-1.37739	2.59799	down	noncoding	ENST00000450663	GOT2L2	Ensembl	1251	chr1	-	173110238	173111489		AGACCATTTCTGGAACTGGGGCCTTAAGGATCGGAGCCAGTTTTCTCTAAAGATATTTTA	intergenic							108.381	316.161	6.83978	8.21717
ASHG19A3A017171	-2.98295	-1.57674	2.98295	down	noncoding	AK094246		misc_RNA	1873	chr2	+	238963873	238965745		AACTTCAATTATTAATGTCTAGTATCTCTTTTCACTGTTTGTTCTTGTTTCATGACAGCC	intergenic							133.725	449.288	7.14417	8.72091
ASHG19A3A025329	-2.3964	-1.26087	2.3964	down	noncoding	uc003gpk.1	CR936688	UCSC_knowngene	3788	chr4	+	17629878	17633666		GGACACTAGAAATACAAGGTATGGGTCATTAGTAACGCTAATAACATTTTCCTATAGATG	intergenic							93.9949	250.908	6.62772	7.88858
CUST_627_PI426073487	-2.38518	-1.2541	2.38518	down	noncoding	uc.148-	uc.148	UCR	240	chr4	-	151493951	151494191		AGTATGGGTAATGGGTGACAGAGGCAGGTATGTCATTATCAATGAGCTCCAGAACAGTAG	intron sense-overlapping	NM_001199282	LRBA	lipopolysaccharide-responsive and beige-like	-	151185595	151936436	503.017	1362.78	9.0713	10.3254
CUST_627_PI426073487	-2.38518	-1.2541	2.38518	down	noncoding	uc.148-	uc.148	UCR	240	chr4	-	151493951	151494191		AGTATGGGTAATGGGTGACAGAGGCAGGTATGTCATTATCAATGAGCTCCAGAACAGTAG	intron sense-overlapping	NM_006726	LRBA	lipopolysaccharide-responsive and beige-like	-	151185595	151936649	503.017	1362.78	9.0713	10.3254
ASHG19A3A043543	-4.07856	-2.02806	4.07856	down	noncoding	ENST00000451627	RP11-499O7.4	Ensembl	125	chr10	+	5091003	5093862	NM_001353,	ATCAGTGTTTGAAGCTAAATGATGGTCACTTCATGCCTGTCCTGGGATTTGGCACCTATG	intergenic							634.644	2938.69	9.40043	11.4285
ASHG19A3A033629	-3.39469	-1.76328	3.39469	down	noncoding	AK124257		misc_RNA	2362	chr7	-	140423814	140426175		GCTGGCACACATTGCCTTCTTTCTCATTGGGTCCAGCAATGAAGATAAGTGTTTGGGTTT	intergenic							159.943	616.245	7.40649	9.16977
ASHG19A3A050742	-2.72162	-1.44447	2.72162	down	noncoding	AK055143		misc_RNA	2360	chr14	-	50037707	50040087		TCCTTTTATTCCTACTCAGTTGGTGCATGTACCCAAAATAAACATTTTGAGTTCATCCAA	intergenic							1088.05	3311.19	10.1729	11.6174
ASHG19A3A048115	-2.21567	-1.14774	2.21567	down	noncoding	ENST00000428029	AC084018.1	Ensembl	895	chr12	-	122233674	122240839		AAAGTGGACACTGAGGTCTGAGGCTTTTGAGGACAGTCAGGAGCCCTCCTATGGGCTCCA	intergenic							183.042	458.252	7.59964	8.74738
ASHG19A3A038914	-2.49528	-1.3192	2.49528	down	noncoding	ENST00000426212	RP11-389K14.1	Ensembl	712	chr9	+	92978480	92979192	ENST00000503990,ENST00000463158,ENST00000445529,ENST00000437705,	TCGTTTGCTGATTTTATGGAACAGGCGTTGGAGGGTACCTCAGTTCAGATGTGTCATCTT	intergenic							181.853	514.637	7.59048	8.90968
ASHG19A3A033301	-2.389	-1.25641	2.389	down	noncoding	AK096084		NRED	2327	chr7	-	101644072	102192620		TCATCTCCTTGATGAATGGGTATAATGGTTGCCATGGAACTGGGGCTTGTTTGATGACCT	intronic antisense	NM_181500	CUX1	protein CASP isoform c	+	101459183	101927250	371.682	1004.56	8.63121	9.88762
ASHG19A3A033301	-2.389	-1.25641	2.389	down	noncoding	AK096084		NRED	2327	chr7	-	101644072	102192620		TCATCTCCTTGATGAATGGGTATAATGGTTGCCATGGAACTGGGGCTTGTTTGATGACCT	intronic antisense	NM_032831	ORAI2	protein orai-2	+	102073995	102097268	371.682	1004.56	8.63121	9.88762
ASHG19A3A033301	-2.389	-1.25641	2.389	down	noncoding	AK096084		NRED	2327	chr7	-	101644072	102192620		TCATCTCCTTGATGAATGGGTATAATGGTTGCCATGGAACTGGGGCTTGTTTGATGACCT	intronic antisense	NM_020979	SH2B2	SH2B adapter protein 2	+	101928404	101962178	371.682	1004.56	8.63121	9.88762
ASHG19A3A033301	-2.389	-1.25641	2.389	down	noncoding	AK096084		NRED	2327	chr7	-	101644072	102192620		TCATCTCCTTGATGAATGGGTATAATGGTTGCCATGGAACTGGGGCTTGTTTGATGACCT	intronic antisense	NM_001202544	CUX1	protein CASP isoform e	+	101459183	101927250	371.682	1004.56	8.63121	9.88762
ASHG19A3A033301	-2.389	-1.25641	2.389	down	noncoding	AK096084		NRED	2327	chr7	-	101644072	102192620		TCATCTCCTTGATGAATGGGTATAATGGTTGCCATGGAACTGGGGCTTGTTTGATGACCT	intron sense-overlapping	NM_017621	ALKBH4	probable alpha-ketoglutarate-dependent	-	102096666	102105321	371.682	1004.56	8.63121	9.88762
ASHG19A3A033301	-2.389	-1.25641	2.389	down	noncoding	AK096084		NRED	2327	chr7	-	101644072	102192620		TCATCTCCTTGATGAATGGGTATAATGGTTGCCATGGAACTGGGGCTTGTTTGATGACCT	intronic antisense	NM_024653	PRKRIP1	PRKR-interacting protein 1	+	102036803	102067129	371.682	1004.56	8.63121	9.88762
ASHG19A3A033301	-2.389	-1.25641	2.389	down	noncoding	AK096084		NRED	2327	chr7	-	101644072	102192620		TCATCTCCTTGATGAATGGGTATAATGGTTGCCATGGAACTGGGGCTTGTTTGATGACCT	intronic antisense	NM_001913	CUX1	protein CASP isoform b	+	101459183	101927250	371.682	1004.56	8.63121	9.88762
ASHG19A3A033301	-2.389	-1.25641	2.389	down	noncoding	AK096084		NRED	2327	chr7	-	101644072	102192620		TCATCTCCTTGATGAATGGGTATAATGGTTGCCATGGAACTGGGGCTTGTTTGATGACCT	intronic antisense	NM_001202545	CUX1	protein CASP isoform f	+	101459183	101927250	371.682	1004.56	8.63121	9.88762
ASHG19A3A033301	-2.389	-1.25641	2.389	down	noncoding	AK096084		NRED	2327	chr7	-	101644072	102192620		TCATCTCCTTGATGAATGGGTATAATGGTTGCCATGGAACTGGGGCTTGTTTGATGACCT	intron sense-overlapping	NM_001146210	SPDYE6	putative speedy protein E6	-	101986191	101996889	371.682	1004.56	8.63121	9.88762
ASHG19A3A033301	-2.389	-1.25641	2.389	down	noncoding	AK096084		NRED	2327	chr7	-	101644072	102192620		TCATCTCCTTGATGAATGGGTATAATGGTTGCCATGGAACTGGGGCTTGTTTGATGACCT	intronic antisense	NM_181552	CUX1	protein CASP isoform a	+	101460881	101901513	371.682	1004.56	8.63121	9.88762
ASHG19A3A033301	-2.389	-1.25641	2.389	down	noncoding	AK096084		NRED	2327	chr7	-	101644072	102192620		TCATCTCCTTGATGAATGGGTATAATGGTTGCCATGGAACTGGGGCTTGTTTGATGACCT	intronic antisense	NM_001126340	ORAI2	protein orai-2	+	102073995	102097268	371.682	1004.56	8.63121	9.88762
ASHG19A3A033301	-2.389	-1.25641	2.389	down	noncoding	AK096084		NRED	2327	chr7	-	101644072	102192620		TCATCTCCTTGATGAATGGGTATAATGGTTGCCATGGAACTGGGGCTTGTTTGATGACCT	intron sense-overlapping	NM_006234	POLR2J	DNA-directed RNA polymerase II subunit RPB11-a	-	102113547	102119381	371.682	1004.56	8.63121	9.88762
ASHG19A3A033301	-2.389	-1.25641	2.389	down	noncoding	AK096084		NRED	2327	chr7	-	101644072	102192620		TCATCTCCTTGATGAATGGGTATAATGGTTGCCATGGAACTGGGGCTTGTTTGATGACCT	natural antisense	NM_001166339	SPDYE2L	putative speedy protein E2-like protein	+	102191678	102202757	371.682	1004.56	8.63121	9.88762
ASHG19A3A033301	-2.389	-1.25641	2.389	down	noncoding	AK096084		NRED	2327	chr7	-	101644072	102192620		TCATCTCCTTGATGAATGGGTATAATGGTTGCCATGGAACTGGGGCTTGTTTGATGACCT	intronic antisense	NM_152892	LRWD1	leucine-rich repeat and WD repeat-containing	+	102105389	102113612	371.682	1004.56	8.63121	9.88762
ASHG19A3A033301	-2.389	-1.25641	2.389	down	noncoding	AK096084		NRED	2327	chr7	-	101644072	102192620		TCATCTCCTTGATGAATGGGTATAATGGTTGCCATGGAACTGGGGCTTGTTTGATGACCT	natural antisense	NM_001031618	SPDYE2	speedy protein E2	+	102191678	102202757	371.682	1004.56	8.63121	9.88762
ASHG19A3A033301	-2.389	-1.25641	2.389	down	noncoding	AK096084		NRED	2327	chr7	-	101644072	102192620		TCATCTCCTTGATGAATGGGTATAATGGTTGCCATGGAACTGGGGCTTGTTTGATGACCT	intron sense-overlapping	NM_001097615	POLR2J3	DNA-directed RNA polymerase II subunit RPB11-b2	-	102178365	102213068	371.682	1004.56	8.63121	9.88762
ASHG19A3A033301	-2.389	-1.25641	2.389	down	noncoding	AK096084		NRED	2327	chr7	-	101644072	102192620		TCATCTCCTTGATGAATGGGTATAATGGTTGCCATGGAACTGGGGCTTGTTTGATGACCT	intronic antisense	NM_001202546	CUX1	protein CASP isoform g	+	101459287	101927250	371.682	1004.56	8.63121	9.88762
ASHG19A3A033301	-2.389	-1.25641	2.389	down	noncoding	AK096084		NRED	2327	chr7	-	101644072	102192620		TCATCTCCTTGATGAATGGGTATAATGGTTGCCATGGAACTGGGGCTTGTTTGATGACCT	intronic antisense	NM_001202543	CUX1	protein CASP isoform d	+	101459183	101901513	371.682	1004.56	8.63121	9.88762
ASHG19A3A035062	-2.04056	-1.02897	2.04056	down	noncoding	G31816		misc_RNA	264	chr7	+	129470576	129470840		GCTGGCAGTCCCTTTTATCTTTTCAAGTATCACACAATATGTACCAAATACAATCTGTAA	natural antisense	NM_003344	UBE2H	ubiquitin-conjugating enzyme E2 H isoform 1	-	129470572	129592800	111.184	253.482	6.87507	7.90404
ASHG19A3A035062	-2.04056	-1.02897	2.04056	down	noncoding	G31816		misc_RNA	264	chr7	+	129470576	129470840		GCTGGCAGTCCCTTTTATCTTTTCAAGTATCACACAATATGTACCAAATACAATCTGTAA	natural antisense	NM_182697	UBE2H	ubiquitin-conjugating enzyme E2 H isoform 2	-	129470572	129592800	111.184	253.482	6.87507	7.90404
ASHG19A3A035062	-2.04056	-1.02897	2.04056	down	noncoding	G31816		misc_RNA	264	chr7	+	129470576	129470840		GCTGGCAGTCCCTTTTATCTTTTCAAGTATCACACAATATGTACCAAATACAATCTGTAA	natural antisense	NM_001202498	UBE2H	ubiquitin-conjugating enzyme E2 H isoform 3	-	129470572	129592783	111.184	253.482	6.87507	7.90404
ASHG19A3A051389	-2.48826	-1.31513	2.48826	down	noncoding	ENST00000396232	AL132639.1	Ensembl	1266	chr14	+	39684265	39685539	NM_016258,NM_001173128,NM_001172828,	TCTTGGGCTGATATTGCTAGCAAGCCTGCAAAACAGCAACCTAAACCGAAGACCAAGAAT	intergenic							296.107	832.22	8.29707	9.61221
ASHG19A3A012043	-2.11461	-1.0804	2.11461	down	noncoding	AK129956		misc_RNA	1826	chr19	+	3463602	3465428		CCTTTAAACAATATCAGCGCACACACATAGCTGCATGTTCTGCTCGTGTAGTTTAAAAAA	exon sense-overlapping	NM_005597	NFIC	nuclear factor 1 C-type isoform 1	+	3366572	3463603	15083.4	34788.5	13.9562	15.0366
ASHG19A3A012043	-2.11461	-1.0804	2.11461	down	noncoding	AK129956		misc_RNA	1826	chr19	+	3463602	3465428		CCTTTAAACAATATCAGCGCACACACATAGCTGCATGTTCTGCTCGTGTAGTTTAAAAAA	exon sense-overlapping	NM_205843	NFIC	nuclear factor 1 C-type isoform 2	+	3359615	3463603	15083.4	34788.5	13.9562	15.0366
ASHG19A3A034552	-2.44741	-1.29126	2.44741	down	noncoding	AK096095		RNAdb	1839	chr7	+	74173181	74175020		GGCCAAGTTATAATAGGAGCAGTAGCTTGAGACCCGAAGTCAGGAAACTTTGACAATGGA	exon sense-overlapping	NM_033000	GTF2I	general transcription factor II-I isoform 2	+	74072029	74175022	5142.85	13996.4	12.4084	13.6997
ASHG19A3A034552	-2.44741	-1.29126	2.44741	down	noncoding	AK096095		RNAdb	1839	chr7	+	74173181	74175020		GGCCAAGTTATAATAGGAGCAGTAGCTTGAGACCCGAAGTCAGGAAACTTTGACAATGGA	exon sense-overlapping	NM_033001	GTF2I	general transcription factor II-I isoform 3	+	74072029	74175022	5142.85	13996.4	12.4084	13.6997
ASHG19A3A034552	-2.44741	-1.29126	2.44741	down	noncoding	AK096095		RNAdb	1839	chr7	+	74173181	74175020		GGCCAAGTTATAATAGGAGCAGTAGCTTGAGACCCGAAGTCAGGAAACTTTGACAATGGA	exon sense-overlapping	NM_001518	GTF2I	general transcription factor II-I isoform 4	+	74072029	74175022	5142.85	13996.4	12.4084	13.6997
ASHG19A3A034552	-2.44741	-1.29126	2.44741	down	noncoding	AK096095		RNAdb	1839	chr7	+	74173181	74175020		GGCCAAGTTATAATAGGAGCAGTAGCTTGAGACCCGAAGTCAGGAAACTTTGACAATGGA	exon sense-overlapping	NM_032999	GTF2I	general transcription factor II-I isoform 1	+	74072029	74175022	5142.85	13996.4	12.4084	13.6997
ASHG19A3A034552	-2.44741	-1.29126	2.44741	down	noncoding	AK096095		RNAdb	1839	chr7	+	74173181	74175020		GGCCAAGTTATAATAGGAGCAGTAGCTTGAGACCCGAAGTCAGGAAACTTTGACAATGGA	exon sense-overlapping	NM_001163636	GTF2I	general transcription factor II-I isoform 5	+	74072029	74175022	5142.85	13996.4	12.4084	13.6997
ASHG19A3A000425	-2.04554	-1.03248	2.04554	down	noncoding	ENST00000501122	AP000944.1	Ensembl	1987	chr11	+	65191801	65193996		TCGTTAGATTTCATAATACTTTCTTGGAATTCTCTGGGGCTTTGGGGAATTTAGTGCGTG	intergenic							179.902	417.098	7.57555	8.60803
ASHG19A3A007660	-3.7247	-1.89713	3.7247	down	noncoding	NR_028444	PDIA5	RefSeq_NR	1717	chr3	+	122785855	122880953		AGAAGCCCTCCATGGAGAAGCGGATCTGTCGATGCCACTGTCAACAAGGCCCTGGCAGAA	exon sense-overlapping	NM_006810	PDIA5	protein disulfide-isomerase A5 precursor	+	122785855	122880953	210.652	885.744	7.80379	9.70092
ASHG19A3A014483	-3.71491	-1.89333	3.71491	down	noncoding	ENST00000502203	AL691432.1	Ensembl	2219	chr1	+	1535818	1545864		AGGACGCTTGCCTGACAAGGGCCGTCTTCACCTCCAGATGAATGCCAACTCCTGCAACAA	intergenic							119.657	503.418	6.98507	8.87839
ASHG19A3A009250	-2.4945	-1.31875	2.4945	down	noncoding	ENST00000413270	AC015818.9	Ensembl	1174	chr17	+	20327904	20334324	uc002gty.2,uc002gqm.2,NR_003554,NR_003190,NM_032582,NM_004505,ENST00000445583,	GTGCTTTCACCAGTGAGGAAGAGCTAGGGGAAGATGAGATGTACTACTGTTCCAAGTGTA	intergenic							1608.13	4480.2	10.7358	12.0545
ASHG19A3A052693	-3.01038	-1.58994	3.01038	down	noncoding	uc001zcj.2	BC018626	UCSC_knowngene	478	chr15	+	29077525	29084127		GCTTGATCTGACGCTCCTTTTCTAAATAACTTGGATGGATTATTCGTATTTTTTGGTAAC	intergenic							171.284	584.163	7.50389	9.09383
ASHG19A3A046931	-2.22597	-1.15444	2.22597	down	noncoding	BC063618		misc_RNA	2723	chr11	+	110100174	110102320		TAGTAGTGAGGTAGTATTGTTGTCCCCTCCTCGGGACTGATGTTTTTATATGCTGCCCTT	natural antisense	NM_002906	RDX	radixin	-	110100165	110167437	1030.82	2589.17	10.0934	11.2479
ASHG19A3A023125	-2.00533	-1.00384	2.00533	down	noncoding	ENST00000418098	GS1-388B5.6	Ensembl	904	chr3	+	125453137	125454041	ENST00000463158,ENST00000398413,ENST00000344740,	AGTTGTTTGCTGATTTTATGGAACAGGCGTTGGAGAGTACCTCGGTTCAGATGTGTCATC	intergenic							154.515	349.942	7.3554	8.35924
ASHG19A3A041176	-4.23826	-2.08347	4.23826	down	noncoding	ENST00000454388	RP11-493K23.4	Ensembl	1167	chrX	+	72300005	72304474		TTAGAGAGAATTGGAAAGCGTTTGAATGTGGCCCTGTTGTTTAATAAACGATAACAATGA	bidirectional	NM_001012977	PABPC1L2A	polyadenylate-binding protein 1-like 2	-	72297176	72299351	219.252	1043.52	7.86181	9.94528
ASHG19A3A031771	-2.2132	-1.14614	2.2132	down	noncoding	AJ420536		misc_RNA	1597	chr6	+	83078979	83080544		GCTTTGGTGAATTTGTTTGTTTTATTGTTGTTGCTTTGAGTGAATGCTTCAGTTTGCTCT	intergenic							1580.78	3909.98	10.7102	11.8564
CUST_9_PI426075208	-2.2795	-1.18872	2.2795	down	noncoding	nc-HOXA11-91+	nc-HOXA11-91	HOX cluster	118	chr7	+	27232517	27232635		AACCACCTTCCACGCTGCCAAGAATTAAGACCGGGAGAGATTAAATACCCGATTATTCTC	intergenic							73.6913	187.997	6.28052	7.46924
ASHG19A3A009139	-2.06774	-1.04806	2.06774	down	noncoding	NR_026880	MGC12916	RefSeq_NR	2006	chr17	+	14207056	14209061		CGTTATACAAAATAAGCTGACACGTTAATGCTGTGGCCCACATTAAACAAAGTATACCGT	intron sense-overlapping	NM_006041	HS3ST3B1	heparan sulfate glucosamine 3-O-sulfotransferase	+	14204505	14249492	278.524	651.883	8.20806	9.25612
ASHG19A3A021588	-2.02149	-1.01542	2.02149	down	noncoding	ENST00000514634	RP11-93K22.10	Ensembl	987	chr3	-	129753395	129754382		TTGTTTGCTGATTTTATGGAGCAGGCGTTGGAGGGTACCTTGGTTCAGATGTGTCATCTT	intergenic							162.933	371.169	7.43063	8.44605
ASHG19A3A011071	-2.21423	-1.1468	2.21423	down	noncoding	ENST00000501271	AC012618.1	Ensembl	2885	chr19	-	12301793	12304786		GTTTTTGGATAGTGCCATTGTAGCTCTCAACCTGCATCAGTAACACTCACTGTCCCTATG	intergenic							190.085	475.702	7.6523	8.79911
ASHG19A3A030937	-2.00306	-1.0022	2.00306	down	noncoding	ENST00000510466	AL136307.1	Ensembl	1357	chr6	+	5892672	5986353		CATATACTTTAGAACATCCATTCTGTGCAAAGCTCTGTGCCCACAGCTGTTGAGATGCCA	intergenic							66.7709	149.442	6.13966	7.14187
ASHG19A3A040450	-2.1194	-1.08365	2.1194	down	noncoding	ENST00000455035	RP11-535K18.2	Ensembl	1291	chrX	-	135377848	135382457		TCTCAGTGTTTATCTACAATTATTTCTCCTCTGCTTGCAGAGTTGAAGAGCCAGGCGTGC	bidirectional	NM_153834	GPR112	probable G-protein coupled receptor 112	+	135383121	135499047	427.574	1026.81	8.83665	9.9203
ASHG19A3L0001376	-2.25905	-1.17572	2.25905	down	noncoding	chr3:34626796-34644396-	lincRNA-PDCD6IP-2	lincRNA	17601	chr3	-	34626796	34644396		TTCTTTCTTAGTTGATGCTAATCCATGTGCCCATTCAAACTGAGCTAGACATCATGAATT	intergenic							65.3821	165.305	6.11017	7.28588
ASHG19A3A052173	-6.2012	-2.63255	6.2012	down	noncoding	ENST00000433288	KRT8P28	Ensembl	2990	chr1	-	151920400	151923390		AGGTCTGCTTCTAAAACTGGCCCCAGAGTGATGTGGGGCTGTTGGTGTCCTTGAAGGCAG	intergenic							75.7434	529.717	6.32174	8.95428
ASHG19A3L0000934	-2.28892	-1.19467	2.28892	down	noncoding	exon1961-	lincRNA-CTAGE1-2	lincRNA	1130	chr18	-	20049159	20050288		TTCCTGAAGTGTGTGTGGGAGTTCTGTTGGTTTGGATGTCTGTGCTTTACAACCCGAATT								126.993	327.126	7.07362	8.26829
ASHG19A3A051476	-2.24641	-1.16762	2.24641	down	noncoding	ENST00000479477	RP11-401H9.1	Ensembl	559	chr14	+	59030803	59031362		CAAGCCACAGCCGTTAAAAACAAGGATTTCAGAACATTTTTGGATTGTATCTGTATTTCT	intergenic							96.0459	240.858	6.65831	7.82593
ASHG19A3A007695	-2.36281	-1.2405	2.36281	down	noncoding	NR_029454	LOC440335	RefSeq_NR	668	chr16	+	4838456	4846281		TGACGCCCTCAACCACTCTGCTGGGGAGCCCAAAGATGTTAACTTGTTTAATAATCAAGC	bidirectional	NM_001154458	12-Sep	septin-12 isoform 1	-	4827671	4838399	96.8712	254.531	6.66915	7.90966
ASHG19A3A007695	-2.36281	-1.2405	2.36281	down	noncoding	NR_029454	LOC440335	RefSeq_NR	668	chr16	+	4838456	4846281		TGACGCCCTCAACCACTCTGCTGGGGAGCCCAAAGATGTTAACTTGTTTAATAATCAAGC	bidirectional	NM_144605	12-Sep	septin-12 isoform 2	-	4827671	4838399	96.8712	254.531	6.66915	7.90966
ASHG19A3L0002580	-3.26167	-1.70561	3.26167	down	noncoding	chr3:127258794-127273334+	lincRNA-TPRA1-1	lincRNA	14541	chr3	+	127258794	127273334		AAGGGAATGCATGTGTGCTTTCTCTTCAACCTTAGTCTCTAAAACTACTCAGCTCTGCCC	intergenic							80.3044	292.669	6.40357	8.10918
ASHG19A3A023475	-4.26842	-2.0937	4.26842	down	noncoding	uc003fdu.2	AK055323	UCSC_knowngene	4247	chr3	+	160792440	160796687		GACTGATGGCACGGGCAGAATCACATTTAAGAAAAATGGTTTGGAACACTTTTTAATAAA	intergenic							421.687	2043.94	8.81313	10.9068
ASHG19A3A034702	-2.62899	-1.39451	2.62899	down	noncoding	BC045168		misc_RNA	3922	chr1	+	169455429	169459263		TCTTGGTTTTCTCTCTAAGGAATAACTCATGAAGAACATTCCATGTGTTAAGGTATACCT	bidirectional	NM_006996	SLC19A2	thiamine transporter 1	-	169433148	169455208	299.406	891.059	8.31585	9.71036
ASHG19A3A034134	-2.43111	-1.28161	2.43111	down	noncoding	NR_002186	DKFZP586I1420	RefSeq_NR	2760	chr7	+	30409665	30412408		AATTTAAATATGATTGGACAGCTGTTAAGTTTTGGGGAGGGAAGCAGATGCCAGCGTTCT	intergenic							153.094	421.586	7.34274	8.62435
ASHG19A3A042375	-4.53069	-2.17973	4.53069	down	noncoding	ENST00000305623	RP11-445P17.4	Ensembl	895	chr10	-	5317135	5330433		AACCAAGTCCATCGGGGTGTCCAATTTCAATCACAAACTGCTGGAACTCATCCTCAACAA	intergenic							585.869	3007.69	9.28665	11.4664
ASHG19A3A052131	-2.46066	-1.29905	2.46066	down	noncoding	NR_026891	FLJ10038	RefSeq_NR	5944	chr15	-	50641136	50647076		GATCACAGTCCACCATTCAAACTCTTAGGGTCTAATAGGTTATGGAATTAGGAATTTTTT	intron sense-overlapping	NM_005254	GABPB1	GA-binding protein subunit beta-1 isoform beta	-	50569388	50647605	101.838	279.736	6.74452	8.04356
ASHG19A3A052131	-2.46066	-1.29905	2.46066	down	noncoding	NR_026891	FLJ10038	RefSeq_NR	5944	chr15	-	50641136	50647076		GATCACAGTCCACCATTCAAACTCTTAGGGTCTAATAGGTTATGGAATTAGGAATTTTTT	intron sense-overlapping	NM_016654	GABPB1	GA-binding protein subunit beta-1 isoform beta	-	50569388	50647605	101.838	279.736	6.74452	8.04356
ASHG19A3A052131	-2.46066	-1.29905	2.46066	down	noncoding	NR_026891	FLJ10038	RefSeq_NR	5944	chr15	-	50641136	50647076		GATCACAGTCCACCATTCAAACTCTTAGGGTCTAATAGGTTATGGAATTAGGAATTTTTT	intron sense-overlapping	NM_002041	GABPB1	GA-binding protein subunit beta-1 isoform gamma	-	50578076	50647605	101.838	279.736	6.74452	8.04356
ASHG19A3A052131	-2.46066	-1.29905	2.46066	down	noncoding	NR_026891	FLJ10038	RefSeq_NR	5944	chr15	-	50641136	50647076		GATCACAGTCCACCATTCAAACTCTTAGGGTCTAATAGGTTATGGAATTAGGAATTTTTT	intron sense-overlapping	NM_016655	GABPB1	GA-binding protein subunit beta-1 isoform gamma	-	50578076	50647605	101.838	279.736	6.74452	8.04356
ASHG19A3A052131	-2.46066	-1.29905	2.46066	down	noncoding	NR_026891	FLJ10038	RefSeq_NR	5944	chr15	-	50641136	50647076		GATCACAGTCCACCATTCAAACTCTTAGGGTCTAATAGGTTATGGAATTAGGAATTTTTT	intron sense-overlapping	NM_181427	GABPB1	GA-binding protein subunit beta-1 isoform gamma	-	50578076	50647605	101.838	279.736	6.74452	8.04356
ASHG19A3A034339	-2.86512	-1.51859	2.86512	down	noncoding	ENST00000407916	RP4-791C19.1	Ensembl	4486	chr7	+	55001391	55005877	NM_001030055,	AGAAATGTGTGGAATTTATTGAAGATACAGGGTTATGTACTGAAGGACTCTACCGTGTTA	intergenic							112.892	363.476	6.89814	8.41674
ASHG19A3A055322	-2.09554	-1.06732	2.09554	down	noncoding	uc011cmd.1	SDHA	UCSC_knowngene	1026	chr5	-	1568636	1579695		gctgtcacagatggcagaagaaaacctgagGAATGGTCTGGAACACGGACCTGGTGGAGA	intergenic							672.862	1589.56	9.48232	10.5496
ASHG19A3A035938	-2.12293	-1.08605	2.12293	down	noncoding	CR609281		misc_RNA	1675	chr8	-	90912923	90914593		GCTTTTGTCGATTTGACACGTTCATTTCATTTGAATGTTGGTTCTGAAAATGAAGCATGT	natural antisense	NM_004337	OSGIN2	oxidative stress-induced growth inhibitor 2	+	90914095	90940095	100.956	239.314	6.73078	7.81683
ASHG19A3A035938	-2.12293	-1.08605	2.12293	down	noncoding	CR609281		misc_RNA	1675	chr8	-	90912923	90914593		GCTTTTGTCGATTTGACACGTTCATTTCATTTGAATGTTGGTTCTGAAAATGAAGCATGT	bidirectional	NM_001126111	OSGIN2	oxidative stress-induced growth inhibitor 2	+	90914761	90940095	100.956	239.314	6.73078	7.81683
ASHG19A3A026041	-6.05306	-2.59766	6.05306	down	noncoding	uc003ihb.2	BC042378	UCSC_knowngene	1236	chr4	+	134114523	134115759		GGAATTTCAGCTCTAAACACATTTTTGAGACAGTTATCTGTGAGTGAAAACAGGGTATTA	intergenic							127.044	868.734	7.0742	9.67186
ASHG19A3A043736	-2.02234	-1.01603	2.02234	down	noncoding	CR610854		misc_RNA	1688	chr10	+	27829455	27831141		ACTTCTGGATCAAATTGGACCTGAATTGAGATCTATTTCTCAGCTTTCACTTATGTGAGC	intergenic							216.531	496.796	7.84363	8.85966
ASHG19A3A049218	-2.12326	-1.08628	2.12326	down	noncoding	AK124307		misc_RNA	2028	chr1	-	109941663	109943691		GCATTGTATCATTTTGCTCTACAATGACTATATCCTCATTTGGGTTTATGGCCAGTTTAT	exon sense-overlapping	NM_001199774	PSMA5	proteasome subunit alpha type-5 isoform 2	-	109941652	109969108	423.418	1016.36	8.81972	9.906
ASHG19A3A049218	-2.12326	-1.08628	2.12326	down	noncoding	AK124307		misc_RNA	2028	chr1	-	109941663	109943691		GCATTGTATCATTTTGCTCTACAATGACTATATCCTCATTTGGGTTTATGGCCAGTTTAT	exon sense-overlapping	NM_002790	PSMA5	proteasome subunit alpha type-5 isoform 1	-	109941652	109969070	423.418	1016.36	8.81972	9.906
ASHG19A3A049218	-2.12326	-1.08628	2.12326	down	noncoding	AK124307		misc_RNA	2028	chr1	-	109941663	109943691		GCATTGTATCATTTTGCTCTACAATGACTATATCCTCATTTGGGTTTATGGCCAGTTTAT	exon sense-overlapping	NM_001199772	PSMA5	proteasome subunit alpha type-5 isoform 2	-	109941652	109969070	423.418	1016.36	8.81972	9.906
ASHG19A3A049218	-2.12326	-1.08628	2.12326	down	noncoding	AK124307		misc_RNA	2028	chr1	-	109941663	109943691		GCATTGTATCATTTTGCTCTACAATGACTATATCCTCATTTGGGTTTATGGCCAGTTTAT	exon sense-overlapping	NM_001199773	PSMA5	proteasome subunit alpha type-5 isoform 2	-	109941652	109969081	423.418	1016.36	8.81972	9.906
ASHG19A3A010603	-4.01474	-2.00531	4.01474	down	noncoding	AK095780		misc_RNA	2666	chr18	+	33755223	33757890		TGGGTGGAGTGACGGACACATGGACAGATATGAAGCAAGCACTGTAAAATATTAGTGGTA	intergenic							759.071	3420.01	9.65849	11.6638
ASHG19A3A046672	-2.10602	-1.07452	2.10602	down	noncoding	AK057093		misc_RNA	2129	chr11	+	67819099	67821228		CCAAATATGAAATGCCTTCTCTAGATTAAAAGGATTCAGAGATGTTGCACTATTGCACTA	natural antisense	NM_212469	CHKA	choline kinase alpha isoform b	-	67820325	67888858	1191.94	2841.97	10.3071	11.3816
ASHG19A3A046672	-2.10602	-1.07452	2.10602	down	noncoding	AK057093		misc_RNA	2129	chr11	+	67819099	67821228		CCAAATATGAAATGCCTTCTCTAGATTAAAAGGATTCAGAGATGTTGCACTATTGCACTA	natural antisense	NM_001277	CHKA	choline kinase alpha isoform a	-	67820325	67888858	1191.94	2841.97	10.3071	11.3816
ASHG19A3A037857	-2.02033	-1.01459	2.02033	down	noncoding	ENST00000427833	RP11-196I18.4	Ensembl	329	chr9	-	109879739	109883986		GCTGTGAAGGATCAAGTCCTACTTTCTTCATTGATACGGCAATATCAAATAAATAGTCAT	intergenic							87.1622	196.07	6.51716	7.53175
CUST_667_PI426073487	-2.17037	-1.11794	2.17037	down	noncoding	uc.188-	uc.188	UCR	215	chr6	-	16299383	16299598	NM_000332,	GAATTTTATGGTCCCTTTCTTTGATGGTGCTTGCAGGTTTTCTAGGTAGAAATTATTTCA	exon sense-overlapping	NM_001128164	ATXN1	ataxin-1	-	16299342	16761721	8863.58	21435.9	13.1916	14.3096
CUST_667_PI426073487	-2.17037	-1.11794	2.17037	down	noncoding	uc.188-	uc.188	UCR	215	chr6	-	16299383	16299598	NM_000332,	GAATTTTATGGTCCCTTTCTTTGATGGTGCTTGCAGGTTTTCTAGGTAGAAATTATTTCA	exon sense-overlapping	NM_000332	ATXN1	ataxin-1	-	16299342	16761721	8863.58	21435.9	13.1916	14.3096
ASHG19A3A008712	-2.51171	-1.32867	2.51171	down	noncoding	AF130069		misc_RNA	2039	chr17	-	62529105	62532633		ATTTTCTTTTATCTTTGATTGGGTCAACCTTTGCCTACGAATGCAGTCCTTGAAGTCTTG	natural antisense	NM_138363	CEP95	centrosomal protein of 95 kDa	+	62503157	62534062	98.1249	274.416	6.68887	8.01754
ASHG19A3A007786	-2.29324	-1.19739	2.29324	down	noncoding	NR_033434	UMPS	RefSeq_NR	6584	chr3	+	124449212	124468117		GTCTCGACCGCGTCTTCTGAGTCAGGAACTAAGCGTCTTGTAGAAGGAACTATTAATCCA	exon sense-overlapping	NM_000373	UMPS	uridine 5'-monophosphate synthase	+	124449212	124468119	343.457	891.283	8.51417	9.71155
ASHG19A3A033812	-11.3982	-3.51074	11.3982	down	noncoding	ENST00000455709	AC005534.8	Ensembl	742	chr7	-	156446878	156450387		TGAAGTTTACAAAAGAGAAGCAGCATGTATCCAACAGTTAAAATCCTGAATGCTTAGAAG	natural antisense	NM_001184996	RNF32	RING finger protein 32	+	156433440	156469820	171.393	2207.95	7.50449	11.0152
ASHG19A3A033812	-11.3982	-3.51074	11.3982	down	noncoding	ENST00000455709	AC005534.8	Ensembl	742	chr7	-	156446878	156450387		TGAAGTTTACAAAAGAGAAGCAGCATGTATCCAACAGTTAAAATCCTGAATGCTTAGAAG	natural antisense	NM_001184997	RNF32	RING finger protein 32	+	156435670	156469820	171.393	2207.95	7.50449	11.0152
ASHG19A3A033812	-11.3982	-3.51074	11.3982	down	noncoding	ENST00000455709	AC005534.8	Ensembl	742	chr7	-	156446878	156450387		TGAAGTTTACAAAAGAGAAGCAGCATGTATCCAACAGTTAAAATCCTGAATGCTTAGAAG	natural antisense	NM_030936	RNF32	RING finger protein 32	+	156433352	156469820	171.393	2207.95	7.50449	11.0152
ASHG19A3A044789	-2.78238	-1.47632	2.78238	down	noncoding	ENST00000344740	OR7E12P	Ensembl	973	chr11	-	3412009	3412982	ENST00000505191,ENST00000502808,ENST00000463158,ENST00000445529,ENST00000418098,ENST00000398413,	AGTTGTTTGCTGATTTTATGGAACAGGCATTGGAGGGTACCTCGGTTCAGATGTGTCATC	intergenic							116.457	364.64	6.94365	8.41997
ASHG19A3A053698	-2.25562	-1.17352	2.25562	down	noncoding	AK125571		NRED	2616	chr16	-	31468031	31470647		TGTGTGAGCCCTTCAAAAGTCCTCTCAGCACGTGAGAACTATCATTATGGATGATGCTAG	natural antisense	NM_024742	ARMC5	armadillo repeat-containing protein 5 isoform b	+	31470316	31478488	199.314	509.744	7.72281	8.89634
ASHG19A3A053698	-2.25562	-1.17352	2.25562	down	noncoding	AK125571		NRED	2616	chr16	-	31468031	31470647		TGTGTGAGCCCTTCAAAAGTCCTCTCAGCACGTGAGAACTATCATTATGGATGATGCTAG	natural antisense	NM_001105247	ARMC5	armadillo repeat-containing protein 5 isoform a	+	31470316	31478488	199.314	509.744	7.72281	8.89634
ASHG19A3A041307	-4.57922	-2.1951	4.57922	down	noncoding	ENST00000446763	AL035422.2	Ensembl	403	chrX	+	100673285	100701120		ACATATAATGTTGGCTCTTCCATTTGTTTCTAATTTAGTATTTCTCAATTGATATTTTTT	intergenic							69.2537	357.007	6.19372	8.38883
ASHG19A3A013533	-2.80121	-1.48605	2.80121	down	noncoding	AK023542		NRED	1934	chr2	-	39648532	39650466		ATGCAGGAAACGGGCCAAACTACATCAAATGATTTGTATTGGAGAATAATAGAGAACATT	intron sense-overlapping	NM_003618	MAP4K3	mitogen-activated protein kinase kinase kinase	-	39476421	39664219	1151.56	3608	10.2578	11.7438
ASHG19A3A023065	-2.15366	-1.10679	2.15366	down	noncoding	ENST00000498792	RP11-174O3.1	Ensembl	1227	chr3	+	120025572	120026799	NM_017432,	AACCAAGGCGAGAACCTGGAGACCAACCAGTGGCAGCAGAAGCTGATCATGCAGCTGATC	intergenic							205.3	501.749	7.76748	8.87427
ASHG19A3A033479	-2.53474	-1.34184	2.53474	down	noncoding	ENST00000392199	RP11-312J18.5	Ensembl	1098	chr1	+	160864769	160865869	NM_004595,ENST00000454078,	TGTGTCCCTTCATACCTGGAATTGTGGGTATTTTACACTGTTTGGAAGAAAGCTAAACCC	intergenic							13823.3	38082.4	13.83	15.1718
ASHG19A3A043100	-2.76249	-1.46597	2.76249	down	noncoding	NR_024467	LOC100188947	RefSeq_NR	1038	chr10	-	93066719	93371217		AAGGTCCACCACAAATCCAGCTGAAGAACTGCTCCAAAGTTTAGGTCATGGCAAGAACAA	intronic antisense	NM_173497	HECTD2	probable E3 ubiquitin-protein ligase HECTD2	+	93170095	93222967	93.834	288.993	6.62472	8.09069
ASHG19A3A043100	-2.76249	-1.46597	2.76249	down	noncoding	NR_024467	LOC100188947	RefSeq_NR	1038	chr10	-	93066719	93371217		AAGGTCCACCACAAATCCAGCTGAAGAACTGCTCCAAAGTTTAGGTCATGGCAAGAACAA	intronic antisense	NM_182765	HECTD2	probable E3 ubiquitin-protein ligase HECTD2	+	93170095	93274520	93.834	288.993	6.62472	8.09069
ASHG19A3A021832	-3.93641	-1.97688	3.93641	down	noncoding	uc003fax.1	AK056401	UCSC_knowngene	3283	chr3	-	156465136	156534802		AAGCACCTGGATCTTACAACATTGTTGAGCTCTTTTGTCTCTTGACTTCTAGTTATGAGA	intergenic							1369.93	6061.01	10.5076	12.4845
ASHG19A3A043990	-2.1079	-1.07581	2.1079	down	noncoding	ENST00000242475	ARL4P	Ensembl	1125	chr10	+	62444040	62445165		GACCAGAACACAGTTGTAGAAATTTGACCTGAAGTTAGTGAAATAAAACTCTAAAGAGTG	intronic antisense	NM_001204403	ANK3	ankyrin-3 isoform 3	-	61786055	62493284	82.0704	193.18	6.4342	7.51001
ASHG19A3A024815	-2.36457	-1.24158	2.36457	down	noncoding	BC035666		NRED	1867	chr4	-	146402013	146403853		TTGCAAGAGTCAACTTTTCTCTTGGCTAACTCTTGAAGCTGCATAAAATCTTGCATAATT	natural antisense	NM_005900	SMAD1	mothers against decapentaplegic homolog 1	+	146402950	146480325	81.2452	214.409	6.42062	7.6622
ASHG19A3A024815	-2.36457	-1.24158	2.36457	down	noncoding	BC035666		NRED	1867	chr4	-	146402013	146403853		TTGCAAGAGTCAACTTTTCTCTTGGCTAACTCTTGAAGCTGCATAAAATCTTGCATAATT	bidirectional	NM_001003688	SMAD1	mothers against decapentaplegic homolog 1	+	146403956	146480325	81.2452	214.409	6.42062	7.6622
ASHG19A3A021691	-2.54534	-1.34786	2.54534	down	noncoding	BC040991		RNAdb	2318	chr3	-	141663276	141665559		CAGTACTGAGTTCCTTCACGCACTTGGTTCACCACCATCACTCTTGAGTTTTGGACAAAA	exon sense-overlapping	NM_001178142	TFDP2	transcription factor Dp-2 isoform 5	-	141663269	141747507	274.318	788.243	8.1855	9.53336
ASHG19A3A021691	-2.54534	-1.34786	2.54534	down	noncoding	BC040991		RNAdb	2318	chr3	-	141663276	141665559		CAGTACTGAGTTCCTTCACGCACTTGGTTCACCACCATCACTCTTGAGTTTTGGACAAAA	exon sense-overlapping	NM_001178138	TFDP2	transcription factor Dp-2 isoform 1	-	141663269	141868386	274.318	788.243	8.1855	9.53336
ASHG19A3A021691	-2.54534	-1.34786	2.54534	down	noncoding	BC040991		RNAdb	2318	chr3	-	141663276	141665559		CAGTACTGAGTTCCTTCACGCACTTGGTTCACCACCATCACTCTTGAGTTTTGGACAAAA	exon sense-overlapping	NM_001178140	TFDP2	transcription factor Dp-2 isoform 3	-	141663269	141719229	274.318	788.243	8.1855	9.53336
ASHG19A3A021691	-2.54534	-1.34786	2.54534	down	noncoding	BC040991		RNAdb	2318	chr3	-	141663276	141665559		CAGTACTGAGTTCCTTCACGCACTTGGTTCACCACCATCACTCTTGAGTTTTGGACAAAA	exon sense-overlapping	NM_001178141	TFDP2	transcription factor Dp-2 isoform 4	-	141663269	141747507	274.318	788.243	8.1855	9.53336
ASHG19A3A021691	-2.54534	-1.34786	2.54534	down	noncoding	BC040991		RNAdb	2318	chr3	-	141663276	141665559		CAGTACTGAGTTCCTTCACGCACTTGGTTCACCACCATCACTCTTGAGTTTTGGACAAAA	exon sense-overlapping	NM_001178139	TFDP2	transcription factor Dp-2 isoform 2	-	141663269	141868386	274.318	788.243	8.1855	9.53336
ASHG19A3A021691	-2.54534	-1.34786	2.54534	down	noncoding	BC040991		RNAdb	2318	chr3	-	141663276	141665559		CAGTACTGAGTTCCTTCACGCACTTGGTTCACCACCATCACTCTTGAGTTTTGGACAAAA	exon sense-overlapping	NM_006286	TFDP2	transcription factor Dp-2 isoform 1	-	141663269	141747507	274.318	788.243	8.1855	9.53336
ASHG19A3A020288	-2.19753	-1.13588	2.19753	down	noncoding	ENST00000458080	CTA-292E10.6	Ensembl	505	chr22	+	29196670	29244547		CATATATATGTTTGGAGGTGTGTGTATGTTTGGGGAACCTTTGAATTTGGAAGTACCAAG	bidirectional	NM_005080	XBP1	X-box-binding protein 1 isoform XBP1(U)	-	29190547	29196560	102.152	250.384	6.74969	7.88558
ASHG19A3A020288	-2.19753	-1.13588	2.19753	down	noncoding	ENST00000458080	CTA-292E10.6	Ensembl	505	chr22	+	29196670	29244547		CATATATATGTTTGGAGGTGTGTGTATGTTTGGGGAACCTTTGAATTTGGAAGTACCAAG	bidirectional	NM_001079539	XBP1	X-box-binding protein 1 isoform XBP1(S)	-	29190547	29196560	102.152	250.384	6.74969	7.88558
ASHG19A3A046037	-2.92225	-1.54708	2.92225	down	noncoding	ENST00000322493	OR51N1P	Ensembl	954	chr11	+	4807962	4808920		GTTGCAGTCTTCTACATTCCCTGGGTTGTTCTTTCAGTTGTCCACAGATTTTTCCACAAG	intergenic							68.8237	225.435	6.18503	7.73211
ASHG19A3A034762	-2.27164	-1.18374	2.27164	down	noncoding	BC032798		NRED	1188	chr7	+	98630561	98634100		ACTCAAGGACATGTGGAGTTTCAAGTCTGAAGAGAGGAGAATTCAGCAAGAGTTAGGTGG	natural antisense	NM_020429	SMURF1	E3 ubiquitin-protein ligase SMURF1 isoform 1	-	98625057	98741743	75.7049	192.454	6.32125	7.50498
ASHG19A3A034762	-2.27164	-1.18374	2.27164	down	noncoding	BC032798		NRED	1188	chr7	+	98630561	98634100		ACTCAAGGACATGTGGAGTTTCAAGTCTGAAGAGAGGAGAATTCAGCAAGAGTTAGGTGG	natural antisense	NM_181349	SMURF1	E3 ubiquitin-protein ligase SMURF1 isoform 2	-	98625057	98741743	75.7049	192.454	6.32125	7.50498
ASHG19A3A034762	-2.27164	-1.18374	2.27164	down	noncoding	BC032798		NRED	1188	chr7	+	98630561	98634100		ACTCAAGGACATGTGGAGTTTCAAGTCTGAAGAGAGGAGAATTCAGCAAGAGTTAGGTGG	natural antisense	NM_001199847	SMURF1	E3 ubiquitin-protein ligase SMURF1 isoform 3	-	98625057	98741743	75.7049	192.454	6.32125	7.50498
ASHG19A3A021822	-2.06254	-1.04442	2.06254	down	noncoding	ENST00000464884	RP11-294L13.1	Ensembl	2127	chr3	-	155829220	155831987	NM_005591,NM_005590,	CTTGTTATCTGGGGCCATGCACATGAGTGTAAAATAGCTCCAACCAAAAATGAACAACAG	intergenic							82.3426	189.789	6.43871	7.48313
ASHG19A3A022912	-2.39109	-1.25767	2.39109	down	noncoding	ENST00000466609	RP11-569H14.1	Ensembl	2769	chr3	+	98376645	98379414	NM_007013,	TACTTGGTTACCAAGAAGCCATACATGTTTTAATCTCTTGGATCTACCACCATATAAGAG	intergenic							7218.36	19093.4	12.891	14.1487
ASHG19A3A046319	-4.97484	-2.31465	4.97484	down	noncoding	NR_027134	DKFZp779M0652	RefSeq_NR	665	chr11	+	45792982	45793908		TCTCTGGCACCTGGTGTTTGAATGGCCAGCCTCACAGTTAATAAAGACAAGTTTGGTATC	intergenic							74.2483	416.917	6.29297	8.60763
ASHG19A3A036003	-2.05478	-1.03899	2.05478	down	noncoding	AF074984		NRED	621	chr8	-	101916570	101930474		CCTAGTGCCAGGAAATTGGAAAATCCAATGACTTTTTGTGTGTAAAGTACTGGAATTTTT	intergenic							197.923	459.851	7.71269	8.75168
ASHG19A3A035836	-2.23088	-1.15761	2.23088	down	noncoding	AK024518		RNAdb	1881	chr8	-	68101556	68103403		TATATATATTTGGGGGGATGATGTTATTGCCAAGCCTCTTTGCTACACCAATAAGTTGGT	natural antisense	NM_024790	CSPP1	centrosome and spindle pole-associated protein	+	67976602	68108849	78.7618	196.52	6.37757	7.53518
CUST_639_PI426073487	-3.19916	-1.67769	3.19916	down	noncoding	uc.160-	uc.160	UCR	322	chr5	-	77268843	77269165		ATGAGATTTAAATGTGCATCTCATTTCCCCAGCACGGAGCATGCCGTTTGGTTCAGAAAG	intergenic							77.2439	276.75	6.35129	8.02898
ASHG19A3A046594	-2.68997	-1.42759	2.68997	down	noncoding	uc001odz.2	CR595720	UCSC_knowngene	1277	chr11	+	65269557	65271077	NR_002819,	CAATTATGGGAAATGCAAAAGTTGTTTGGATATGGTAGTGTGTGGTTCTCTTTTGGAATT	intergenic							632.037	1921.81	9.39378	10.8214
