# Supplementary material for: The Role of PinX1 in Growth Control of Breast Cancer Cells and Its Potential Molecular Mechanism by mRNA and lncRNA Expression Profiles Screening
Source: Biomed Res Int. 2014 Feb 3;2014:978984. doi: 10.1155/2014/978984 (PMC3929369; doi:10.1155/2014/978984)
Supplement: Supplementary file 1 — Human LncRNA Array V2.0 was applied for screening the alterations of lncRNA and mRNA expression profile between PinX1 overexpressed and control MCF-7 cells. After the quantile normalization and data filtering steps, the mRNA expression profile data qualified for fold-change comparison was listed in Tables S1, and lncRNA expression profile data was listed in Table S2. The differentially expressed mRNAs was listed in Tables S3 and differentially expressed lncRNAs was listed in Tables S4. GO analysis of the differentially expressed mRNAs by biological processes, cellular components and molecular functions was showed in Table S5. Profiling data of enhancer-like lncRNAs was listed in Table S6. The enhancer-like lncRNAs and their adjacent coding gene pairs was listed in Table S7. Profiling data of the Rinn lincRNAs was listed in Table S8. The Rinn lincRNAs and their adjacent coding gene pairs was listed in Table S9. Profiling data of the Hox clusters was listed in Table S10. [file 978984.f1.zip › 978984.f1/Table S5.xls]

## Sheet: BP_up
#Column "GO.ID" stands for the ID of gene ontology term
#Column "Term" stands for the name of gene ontology term
#Column "Ontology" stands for the ontology of GOID belongs to
#Column "Count" stands for the number of DE genes associated with the listed GOID
#Column "Pop.Hits" stands for the number of background population genes associated with the listed GOID
#Column "List.Total" stands for the total number of DE genes
#Column "Pop.Total" stands for the total number of background population genes
#Column "Fold.Enrichment" stands for the Fold Enrichment value of the GOID, it equals (Count/Pop.Hits)/(List.Total/Pop.Total)
#Column "Pvalue" stands for the significance testing value of the GOID
#Column "FDR" stands for the false discovery rate of the GOID, using Benjamini & Hochberg (1995) method
#Column "Enrichment.Score" stands for the Enrichment Score value of the GOID, it equals (-log10(Pvalue))
#Column "GENES" stands for the DE genes associated with the GOID
GO.ID	Term	Ontology	Count	Pop.Hits	List.Total	Pop.Total	Fold.Enrichment	Pvalue	FDR	Enrichment.Score	GENES
GO:0042221	response to chemical stimulus	Biological process	93	2641	271	14742	1.91559	5.16246e-11	2.20024e-07	10.2871	S100A7//BCL2//CRHR1//NF1//CCL5//DNAJB4//CHAC1//MGST3//S100A12//CXCL1//S100A8//S100A9//CCL22//CXCL16//SCARA3//CALR//COL4A5//FGFR1//PAK2//ROCK1//EZR//ARTN//LGI1//TUBB3//MYL9//PLXNA4//BRCA2//GNAI2//SORBS1//PPP2CB//PRKACB//FOS//ABCG2//CSAG2//DHRS2//SLC6A14//TRPM6//NEDD4L//CBLB//RBM14//FKBP1B//EIF2B4//GART//SQLE//MLXIPL//HIPK1//NR3C1//HYAL1//CIITA//ADAR//KLF6//IFI6//IFI27//IRF6//OAS1//OAS2//STAT1//LRP…
GO:0010033	response to organic substance	Biological process	64	1620	271	14742	2.14908	1.90322e-09	4.05577e-06	8.72051	DNAJB4//CHAC1//CALR//FGFR1//SORBS1//PPP2CB//PRKACB//CBLB//RBM14//FKBP1B//EIF2B4//MLXIPL//HIPK1//FOS//ADAR//KLF6//IFI6//IFI27//IRF6//CIITA//OAS1//OAS2//STAT1//LRP8//ISG15//IRF9//USP18//DNMT3A//RRAGD//RRAGC//EIF2AK2//BCL2//CCL5//BRCA2//PRDM2//S100A7//S100A8//S100A9//NR3C1//VGF//CGA//PCNA//CXCL16//KYNU//CHRNB1//CD36//IDI1//LY6D//NTRK3//ANXA3//CALCR//PXN//GFI1//LILRB1//CASP1//MME//HYAL1//MSX2//OPRD1/…
GO:0006950	response to stress	Biological process	86	2773	271	14742	1.68708	1.90528e-07	0.000270677	6.72004	RAD17//S100A7//BRCA2//CDKN2D//BCL2//CRHR1//NF1//CD36//FOS//LILRB1//S100A8//MGST3//S100A9//CCL5//DNAJB4//CHAC1//TPSAB1//ANXA3//S100A12//CST11//DAGLA//CD47//CD59//GAS6//GNAI1//GNAI2//GUCY1A3//ITGAL//PRKACB//TFPI//LRP8//SLC16A3//RASGRP1//HPS5//PCNA//SFPQ//RBM14//INTS3//S1PR3//CXCL1//HYAL1//IL1RAP//CCL22//BLNK//PSMB9//SCARA3//CALR//INSIG1//EIF2B4//VGF//KLK6//HPSE//EIF2AK2//CIITA//KYNU//CXCL16//DHRS2/…
GO:0051716	cellular response to stimulus	Biological process	126	4754	271	14742	1.44178	5.7478e-07	0.000369837	6.2405	RAD17//FGFR1//NF1//CCL5//CAMKK2//PXN//RGS3//BRCA2//CDKN2D//GNAI2//CD36//FOS//LILRB1//WNT2//FBXW11//CASP1//CBLB//CGA//CHRNB1//CRABP2//GAS6//GNAI1//NR3C1//CXCL1//IL1RAP//ITGAL//MGST3//PAK2//PRKACB//ROCK1//S100A9//CCL22//SIPA1//LRP8//RASSF7//WISP2//CLIC3//ARTN//LITAF//PTGES//RASGRP1//NMU//RAP2C//PLEKHB1//SMOC2//PLXNA4//NTRK2//NTRK3//BLNK//RASGRP4//GUCY1A3//WSB1//PCNA//SFPQ//RBM14//INTS3//S100A12//BC…
GO:0007165	signal transduction	Biological process	109	3923	271	14742	1.51146	6.15662e-07	0.000369837	6.21066	FGFR1//NF1//CCL5//CAMKK2//PXN//RGS3//GNAI2//CD36//FOS//LILRB1//WNT2//FBXW11//NTRK2//NTRK3//BLNK//RASGRP4//CBLB//CXCL1//GUCY1A3//ROCK1//SIPA1//WSB1//PSMB9//BRCA2//CALR//CD59//TNK2//IRF9//PRKACB//KLF10//CRHR1//S1PR3//GNAI1//FFAR2//OPRD1//NMU//CALCR//CD47//ITGAL//CCM2//MLXIPL//STAT1//ARL4A//ARHGEF9//ARHGEF18//RAB40C//RAP2C//RRAGC//RASGRP1//PLEKHB1//USP20//SORBS1//PPP2CB//HIPK1//FKBP1B//TWIST1//ADAR/…
GO:0060337	type I interferon-mediated signaling pathway	Biological process	10	71	271	14742	7.66176	6.42371e-07	0.000369837	6.19221	STAT1//USP18//ADAR//IFI6//IFI27//IRF6//OAS1//OAS2//ISG15//IRF9
GO:0071357	cellular response to type I interferon	Biological process	10	71	271	14742	7.66176	6.42371e-07	0.000369837	6.19221	ADAR//IFI6//IFI27//IRF6//OAS1//OAS2//STAT1//ISG15//IRF9//USP18
GO:0034340	response to type I interferon	Biological process	10	72	271	14742	7.55535	7.34027e-07	0.000369837	6.13429	ADAR//IFI6//IFI27//IRF6//OAS1//OAS2//STAT1//ISG15//IRF9//USP18
GO:0070887	cellular response to chemical stimulus	Biological process	52	1410	271	14742	2.00619	7.80979e-07	0.000369837	6.10736	CCL5//MGST3//S100A12//CALR//FGFR1//SORBS1//PPP2CB//PRKACB//MLXIPL//HIPK1//S100A7//ADAR//KLF6//IFI6//IFI27//IRF6//CIITA//OAS1//OAS2//STAT1//LRP8//ISG15//IRF9//USP18//PLXNA4//DNMT3A//RRAGD//RRAGC//S100A9//EIF2AK2//CGA//FOS//DHRS2//PXN//TPM1//NR3C1//CXCL16//CD36//GFI1//MT1F//MT1B//NTRK3//WNT2//CASP1//MME//HYAL1//MSX2//OPRD1//CRHR1//TWIST1//THBS4//CASK
GO:0007154	cell communication	Biological process	119	4490	271	14742	1.44174	1.66356e-06	0.000709011	5.77896	FGFR1//NF1//CCL5//CAMKK2//PXN//RGS3//GNAI2//CD36//FOS//LILRB1//WNT2//FBXW11//CASP1//CBLB//CGA//CHRNB1//CRABP2//GAS6//GNAI1//NR3C1//CXCL1//IL1RAP//ITGAL//MGST3//PAK2//PRKACB//ROCK1//S100A9//CCL22//SIPA1//LRP8//RASSF7//WISP2//CLIC3//ARTN//LITAF//PTGES//RASGRP1//NMU//RAP2C//PLEKHB1//SMOC2//PLXNA4//NTRK2//NTRK3//BLNK//RASGRP4//GUCY1A3//WSB1//PSMB9//BRCA2//CALR//CD59//TNK2//IRF9//KLF10//CRHR1//S1PR3//…
GO:0050896	response to stimulus	Biological process	161	6691	271	14742	1.30895	2.02357e-06	0.000784043	5.69388	RAD17//FGFR1//NF1//CCL5//CAMKK2//PXN//RGS3//S100A7//BRCA2//CDKN2D//FOS//BCL2//CRHR1//LILRB1//TAP2//GNAI2//VGF//CD36//ITGAL//S100A8//MGST3//S100A9//DNAJB4//CHAC1//TPSAB1//ANXA3//S100A12//CST11//HYAL1//EIF2AK2//CCL22//STAT1//ISG15//IRF9//DAGLA//CD47//CD59//GAS6//GNAI1//GUCY1A3//PRKACB//TFPI//LRP8//SLC16A3//RASGRP1//HPS5//WNT2//FBXW11//CASP1//CBLB//CGA//CHRNB1//CRABP2//NR3C1//CXCL1//IL1RAP//PAK2//RO…
GO:0023052	signaling	Biological process	116	4383	271	14742	1.43971	2.77256e-06	0.000984719	5.55712	FGFR1//NF1//CCL5//CAMKK2//PXN//RGS3//GNAI2//CD36//FOS//LILRB1//WNT2//FBXW11//CASP1//CBLB//CGA//CHRNB1//CRABP2//GAS6//GNAI1//NR3C1//CXCL1//IL1RAP//ITGAL//MGST3//PAK2//PRKACB//ROCK1//S100A9//CCL22//SIPA1//LRP8//RASSF7//WISP2//CLIC3//ARTN//LITAF//PTGES//RASGRP1//NMU//RAP2C//PLEKHB1//SMOC2//PLXNA4//NTRK2//NTRK3//BLNK//RASGRP4//GUCY1A3//WSB1//PSMB9//BRCA2//CALR//CD59//TNK2//IRF9//KLF10//CRHR1//S1PR3//…
GO:0002376	immune system process	Biological process	55	1649	271	14742	1.81438	7.75757e-06	0.00254329	5.11027	BCL2//LILRB1//TAP2//CD36//FOS//ITGAL//CCL5//CALR//PSMB9//CBLB//CRHR1//IFI6//CXCL1//IL1RAP//CIITA//OAS1//OAS2//OPRD1//CCL22//BLNK//S100A7//PAK2//BRCA2//LY6D//RASGRP4//KLF6//MFAP2//S100A9//MPZL2//GFI1//KYNU//CXCL16//FKBP1B//DHRS2//ANXA3//CASP1//S100A12//ISG15//SUGT1//KLF13//SMAP1//NF1//KLF10//CD47//GAS6//ROCK1//SLC16A3//HIPK1//IRF6//STAT1//IRF9//ADAR//IFI27//USP18//THBS4
GO:0071310	cellular response to organic substance	Biological process	39	1028	271	14742	2.06376	1.22309e-05	0.00372343	4.91254	CALR//FGFR1//SORBS1//PPP2CB//PRKACB//MLXIPL//HIPK1//ADAR//KLF6//IFI6//IFI27//IRF6//CIITA//OAS1//OAS2//STAT1//LRP8//ISG15//IRF9//USP18//DNMT3A//RRAGD//RRAGC//EIF2AK2//CGA//FOS//NR3C1//CCL5//CD36//PXN//GFI1//MME//HYAL1//MSX2//OPRD1//CRHR1//WNT2//CASK//CASP1
GO:0006952	defense response	Biological process	39	1041	271	14742	2.03799	1.63009e-05	0.00463164	4.78779	BCL2//CD36//FOS//LILRB1//S100A8//MGST3//S100A9//CCL5//ANXA3//S100A12//CST11//S1PR3//CXCL1//HYAL1//IL1RAP//ITGAL//CCL22//BLNK//S100A7//EIF2AK2//CIITA//KYNU//CXCL16//CASP1//ISG15//SUGT1//PAK2//NT5E//OAS1//IRF6//OAS2//STAT1//IRF9//ADAR//IFI6//IFI27//USP18//TPSAB1
GO:0008285	negative regulation of cell proliferation	Biological process	23	475	271	14742	2.63403	2.35156e-05	0.00626396	4.62864	CAV2//NF1//STAT1//CASK//LILRB1//BRCA2//BCL2//EIF2AK2//CBLB//ALOX15B//CDKN2D//CXCL1//HYAL1//IRF6//MSX2//KLF10//CUL2//WISP2//PTGES//DHRS2//TES//KLF13//PINX1
GO:0048519	negative regulation of biological process	Biological process	80	2838	271	14742	1.53343	2.66924e-05	0.00669194	4.57361	PSMB9//RAD17//CALR//CD36//DNMT3A//GFI1//CIITA//MSX2//PCNA//SMARCA4//STAT1//TBL1X//KLF10//TWIST1//BHLHE40//WWP2//MLXIPL//HDAC10//LCOR//RGS3//LILRB1//CAV2//NF1//CASK//BCL2//CDKN2D//IFI6//NR3C1//NME5//IRF6//CUL2//RPRM//SESN3//SIPA1//S1PR3//GNAI1//GNAI2//OPRD1//ALOX15B//CXCL1//HYAL1//EIF2AK2//WISP2//PTGES//DHRS2//TES//KLF13//PINX1//FKBP1B//NEDD4L//INSIG1//CCL5//ROCK1//THBS4//NAB1//FBXW11//ARID5B//TPM…
GO:0045087	innate immune response	Biological process	24	520	271	14742	2.5107	3.38172e-05	0.00800715	4.47086	CD36//FOS//CIITA//KYNU//CXCL16//CCL5//LILRB1//IRF6//OAS1//OAS2//STAT1//IRF9//ADAR//IFI6//IFI27//ISG15//USP18//BCL2//CASP1//IL1RAP//S100A7//S100A12//SUGT1
GO:0008283	cell proliferation	Biological process	47	1407	271	14742	1.81715	3.9189e-05	0.00879072	4.40684	BRCA2//CAV2//NF1//STAT1//THBS4//WNT2//LILRB1//ARTN//CALR//CD47//S1PR3//FGFR1//GNAI2//NTRK2//MLXIPL//SP6//ALOX15B//CDKN2D//CXCL1//HYAL1//IRF6//MSX2//EIF2AK2//KLF10//CUL2//WISP2//PTGES//DHRS2//TES//KLF13//PINX1//CASK//BCL2//HPSE//FKBP1B//ITGAL//CCL5//NR3C1//CBLB//GAS6//TWIST1//INSIG1//MKI67//PCNA//SIPA1//LGI1//RASGRP4
GO:0042127	regulation of cell proliferation	Biological process	38	1063	271	14742	1.94463	5.86862e-05	0.012506	4.23146	CAV2//NF1//STAT1//THBS4//WNT2//CALR//CD47//S1PR3//FGFR1//GNAI2//NTRK2//MLXIPL//SP6//ALOX15B//CDKN2D//CXCL1//HYAL1//IRF6//MSX2//EIF2AK2//KLF10//CUL2//WISP2//PTGES//DHRS2//TES//KLF13//PINX1//CASK//BCL2//LILRB1//BRCA2//HPSE//ITGAL//CCL5//CBLB//GAS6//NR3C1
GO:0034097	response to cytokine stimulus	Biological process	22	473	271	14742	2.53016	6.4673e-05	0.0131255	4.18928	HIPK1//ADAR//KLF6//IFI6//IFI27//IRF6//CIITA//OAS1//OAS2//STAT1//LRP8//ISG15//IRF9//USP18//KYNU//CXCL16//CCL5//GFI1//MME//HYAL1//BCL2//FOS
GO:0032501	multicellular organismal process	Biological process	126	5201	271	14742	1.31786	8.14086e-05	0.0157711	4.08933	BMP5//FGFR1//KLF10//TWIST1//C1ORF9//S100A7//SLC12A6//BCL2//VGF//EIF2B4//BRCA2//CCM2//MSX2//NF1//HIPK1//FOS//NMU//FOXD2//NTRK2//NTRK3//DYX1C1//S1PR3//MME//ARID5B//AQP11//TMED2//NAB1//GAA//GJA8//WNT2//MGST3//CBLB//LILRB1//TPM1//STAT1//SMARCA4//CHRNB1//FKBP1B//PXN//SSPN//MYL9//SORBS1//DAGLA//CD36//CD47//CD59//GAS6//GNAI1//GNAI2//GUCY1A3//ITGAL//PRKACB//TFPI//LRP8//SLC16A3//RASGRP1//HPS5//ROCK1//CAV2…
GO:0006164	purine nucleotide biosynthetic process	Biological process	14	234	271	14742	3.25461	0.000111596	0.0198798	3.95235	GUCY1A3//NME5//GART//CALCR//CRHR1//NTRK2//S1PR3//GNAI1//GNAI2//OPRD1//NF1//NT5E//OAS1//OAS2
GO:0009611	response to wounding	Biological process	37	1056	271	14742	1.90601	0.000111946	0.0198798	3.95099	S100A8//MGST3//S100A9//CCL5//DAGLA//CD36//CD47//CD59//GAS6//GNAI1//GNAI2//GUCY1A3//ITGAL//PRKACB//TFPI//LRP8//SLC16A3//RASGRP1//HPS5//S1PR3//FOS//CXCL1//HYAL1//IL1RAP//S100A12//CCL22//BLNK//HPSE//BCL2//MSX2//KLF6//NF1//TPM1//KLK6//NTRK3//NT5E//CASK
GO:0009416	response to light stimulus	Biological process	12	183	271	14742	3.56712	0.00014675	0.0250179	3.83342	PLEKHB1//CRHR1//NF1//CDKN2D//NMU//SCARA3//BCL2//BRCA2//BHLHE40//MME//HYAL1//FOS
GO:0048856	anatomical structure development	Biological process	91	3510	271	14742	1.41033	0.000153174	0.0251088	3.81481	BCL2//BMP5//FGFR1//KLF10//S100A7//SLC12A6//VGF//EIF2B4//BRCA2//CCM2//HIPK1//NF1//FOXD2//NTRK2//NTRK3//TWIST1//DYX1C1//MME//ARID5B//AQP11//TMED2//NAB1//MSX2//GJA8//WNT2//CBLB//GAA//STAT1//SMARCA4//NME5//S1PR3//MPZL2//MLXIPL//FOS//CXCL1//THBS4//LGI1//ZIC5//PLXNA4//ARTN//COL4A5//PAK2//ROCK1//EZR//TUBB3//MYL9//KLK6//NR3C1//PHGDH//PCNA//ARHGEF18//CGA//CDSN//CRABP2//GFI1//C11ORF9//HDAC10//ANXA3//LRP8//…
GO:0040007	growth	Biological process	28	727	271	14742	2.09513	0.000177697	0.0261845	3.75032	RRAGC//RASGRP4//WISP2//BRCA2//MSX2//BCL2//HYAL1//LGI1//CXCL16//CDKN2D//SIPA1//SMARCA4//CD36//TMED2//ARID5B//GAS6//PAK2//KLK6//ALOX15B//MT1B//MT1F//CGA//NTRK3//PLXNA4//FOXD2//WNT2//BMP5
GO:0040011	locomotion	Biological process	38	1123	271	14742	1.84073	0.000183423	0.0261845	3.73655	FOXD2//FGFR1//NTRK2//NTRK3//TWIST1//DYX1C1//CCL5//CXCL1//S100A8//S100A9//CCL22//CXCL16//COL4A5//PAK2//ROCK1//EZR//ARTN//LGI1//TUBB3//MYL9//PLXNA4//ANXA3//HYAL1//ARID5B//S100A7//BCL2//LRP8//ALOX15B//NF1//TPM1//RAP2C//MSX2//WWP2//CD47//GAS6//ITGAL//SLC16A3//THBS4
GO:0019221	cytokine-mediated signaling pathway	Biological process	16	307	271	14742	2.8351	0.000183704	0.0261845	3.73588	HIPK1//STAT1//IRF6//CIITA//OAS1//OAS2//IRF9//ADAR//IFI6//IFI27//ISG15//USP18//CCL5//GFI1//KLF6//LRP8
GO:0071345	cellular response to cytokine stimulus	Biological process	18	373	271	14742	2.62513	0.000191938	0.0261845	3.71684	HIPK1//ADAR//KLF6//IFI6//IFI27//IRF6//CIITA//OAS1//OAS2//STAT1//LRP8//ISG15//IRF9//USP18//CCL5//GFI1//HYAL1//MME
GO:0034341	response to interferon-gamma	Biological process	9	110	271	14742	4.45079	0.000193115	0.0261845	3.71418	IRF6//CIITA//OAS1//OAS2//STAT1//IRF9//CCL5//KYNU//CXCL16
GO:0072522	purine-containing compound biosynthetic process	Biological process	14	247	271	14742	3.08332	0.000196599	0.0261845	3.70642	GART//NT5E//OAS1//OAS2//GUCY1A3//NME5//CALCR//CRHR1//NTRK2//S1PR3//GNAI1//GNAI2//OPRD1//NF1
GO:0009165	nucleotide biosynthetic process	Biological process	15	279	271	14742	2.92465	0.000208398	0.026915	3.68111	GART//NT5E//OAS1//OAS2//NME5//GUCY1A3//CALCR//CRHR1//NTRK2//S1PR3//GNAI1//GNAI2//OPRD1//KYNU//NF1
GO:0030154	cell differentiation	Biological process	67	2408	271	14742	1.51358	0.000229079	0.0287158	3.64001	BRCA2//CCM2//MSX2//NF1//FOXD2//FGFR1//NTRK2//NTRK3//TWIST1//DYX1C1//BCL2//STAT1//NME5//ARTN//COL4A5//PAK2//ROCK1//EZR//LGI1//TUBB3//MYL9//PLXNA4//CD36//GFI1//C11ORF9//EIF2B4//HDAC10//NAB1//PRDM12//LY6D//RASGRP4//WNT2//KLF6//BLNK//CDSN//IRF6//S100A7//MFAP2//CRHR1//UPK2//RHCG//ALOX15B//MPZL2//KLF10//CDH23//CDH15//DHRS2//TPM1//ARID5B//KLK6//INSIG1//TRIB2//KLF13//SMAP1//CALR//CCL5//CAV2//CHRNB1//THBS…
GO:0007166	cell surface receptor signaling pathway	Biological process	61	2166	271	14742	1.532	0.000344723	0.0419775	3.46253	GNAI2//LILRB1//WNT2//FBXW11//NTRK2//NTRK3//BLNK//RASGRP4//PRKACB//PXN//FOS//KLF10//CRHR1//S1PR3//GNAI1//FFAR2//CXCL1//OPRD1//NMU//CALCR//CD47//ITGAL//CCM2//RGS3//USP20//FGFR1//SORBS1//PPP2CB//HIPK1//CCL5//ADAR//KLF6//IFI6//IFI27//IRF6//CIITA//OAS1//OAS2//STAT1//LRP8//ISG15//IRF9//USP18//CAV2//PAK2//NR3C1//FOXD2//MSX2//KLK6//ARID5B//ARHGEF9//ARHGEF18//EFNA3//BCL2//CBLB//TBL1X//GFI1//PLXNA4//CD36//…
GO:0031327	negative regulation of cellular biosynthetic process	Biological process	32	916	271	14742	1.90039	0.000354789	0.0420031	3.45003	CALR//CD36//DNMT3A//GFI1//CIITA//MSX2//PCNA//SMARCA4//STAT1//TBL1X//KLF10//TWIST1//BHLHE40//WWP2//MLXIPL//HDAC10//LCOR//S1PR3//GNAI1//GNAI2//OPRD1//RAD17//NAB1//FBXW11//ARID5B//EIF2B4//LILRB1//CCL5//TRIB2//INSIG1//C1QTNF3//BRCA2
GO:0051239	regulation of multicellular organismal process	Biological process	47	1550	271	14742	1.6495	0.000387979	0.0439763	3.41119	VGF//GAA//CBLB//LILRB1//TPM1//STAT1//MYL9//NMU//NF1//FKBP1B//HPSE//HYAL1//TWIST1//NTRK2//GFI1//BCL2//ROCK1//THBS4//CD36//ALOX15B//CCL5//C11ORF9//ISG15//S1PR3//CIITA//BRCA2//TRIB2//MSX2//KLF13//SMAP1//CALR//FGFR1//KLF10//NAB1//ANXA3//HIPK1//BHLHE40//NTRK3//PLXNA4//SSH2//GNAI2//LGI1//OPRD1//WNT2//CRHR1//FOXD2//MLXIPL
GO:0034654	nucleobase-containing compound biosynthetic process	Biological process	15	296	271	14742	2.75668	0.000392093	0.0439763	3.40661	GART//NT5E//OAS1//OAS2//NME5//GUCY1A3//CALCR//CRHR1//NTRK2//S1PR3//GNAI1//GNAI2//OPRD1//KYNU//NF1
GO:0032502	developmental process	Biological process	101	4104	271	14742	1.33876	0.000418155	0.0456968	3.37866	BCL2//BMP5//FGFR1//KLF10//S100A7//SLC12A6//VGF//EIF2B4//BRCA2//CCM2//MSX2//NF1//HIPK1//TWIST1//FOXD2//NTRK2//NTRK3//DYX1C1//MME//ARID5B//AQP11//TMED2//NAB1//GJA8//WNT2//CBLB//GAA//STAT1//SMARCA4//UPK2//NME5//C1ORF9//PLEKHB1//IRX3//ZIC5//PLXNA4//PAQR7//SHISA2//S1PR3//MPZL2//MLXIPL//FOS//CXCL1//THBS4//LGI1//ARTN//COL4A5//PAK2//ROCK1//EZR//TUBB3//MYL9//KLK6//NR3C1//PHGDH//PCNA//DMRTA1//CCL5//ARHGEF1…
GO:0009890	negative regulation of biosynthetic process	Biological process	32	931	271	14742	1.86977	0.000470252	0.0501054	3.32767	CALR//CD36//DNMT3A//GFI1//CIITA//MSX2//PCNA//SMARCA4//STAT1//TBL1X//KLF10//TWIST1//BHLHE40//WWP2//MLXIPL//HDAC10//LCOR//S1PR3//GNAI1//GNAI2//OPRD1//RAD17//INSIG1//NAB1//FBXW11//ARID5B//EIF2B4//LILRB1//CCL5//TRIB2//C1QTNF3//BRCA2
GO:0023051	regulation of signaling	Biological process	52	1789	271	14742	1.58118	0.000501039	0.0520837	3.30013	PXN//RGS3//PRKACB//USP20//RASGRP4//CCL5//HIPK1//NR3C1//LILRB1//TWIST1//FGFR1//NTRK2//NMU//NF1//CAV2//FOXD2//MSX2//C11ORF9//RRAGD//RRAGC//SMAP1//SIPA1//CALR//DYX1C1//GFI1//ARHGEF9//ARHGEF18//ITSN2//CASP1//CD36//S100A12//LITAF//STAT1//TRIB2//KLK6//PPP2CB//VGF//BHLHE40//GNAI2//LGI1//ITGAL//CBLB//RASGRP1//HPSE//CRHR1//USP18//SMARCA4//GAS6//S100A7//WNT2//BCL2//PAK2
GO:0048731	system development	Biological process	80	3095	271	14742	1.4061	0.000520248	0.0527927	3.28379	BMP5//FGFR1//KLF10//S100A7//SLC12A6//BCL2//VGF//EIF2B4//CCM2//HIPK1//NF1//FOXD2//NTRK2//NTRK3//TWIST1//DYX1C1//MME//ARID5B//AQP11//TMED2//NAB1//MSX2//GJA8//WNT2//CBLB//GAA//STAT1//SMARCA4//FOS//CXCL1//THBS4//LGI1//ZIC5//PLXNA4//ARTN//COL4A5//PAK2//ROCK1//EZR//TUBB3//MYL9//KLK6//BRCA2//NR3C1//PHGDH//PCNA//CGA//CDSN//CRABP2//GFI1//C11ORF9//HDAC10//ANXA3//LRP8//PRDM12//LY6D//RASGRP4//KLF6//BLNK//IRF…
GO:0043271	negative regulation of ion transport	Biological process	5	37	271	14742	7.35115	0.000544873	0.0535363	3.26371	BCL2//NEDD4L//LILRB1//GNAI2//OPRD1
GO:0009628	response to abiotic stimulus	Biological process	22	551	271	14742	2.17199	0.000552698	0.0535363	3.25751	FOS//PLEKHB1//CRHR1//NF1//BCL2//NR3C1//EIF2B4//DNAJB4//VGF//CDKN2D//BHLHE40//CBLB//NMU//SCARA3//CCL5//BRCA2//INTS3//CASP1//MKI67//HYAL1//SLC12A6//MME
GO:0006955	immune response	Biological process	34	1023	271	14742	1.80797	0.000567738	0.0537711	3.24585	LILRB1//TAP2//CD36//FOS//ITGAL//BCL2//BLNK//PAK2//CIITA//KYNU//CXCL16//CRHR1//ANXA3//CASP1//IL1RAP//S100A7//S100A12//ISG15//SUGT1//CCL5//IRF6//OAS1//OAS2//STAT1//IRF9//ADAR//IFI6//IFI27//USP18//CBLB//CXCL1//OPRD1//CCL22
GO:0018130	heterocycle biosynthetic process	Biological process	16	344	271	14742	2.53016	0.000647026	0.0575408	3.18908	GART//NT5E//OAS1//OAS2//GUCY1A3//NME5//CALCR//CRHR1//NTRK2//S1PR3//GNAI1//GNAI2//OPRD1//KYNU//TPH1//NF1
GO:0048523	negative regulation of cellular process	Biological process	69	2594	271	14742	1.44699	0.000665021	0.0575408	3.17716	PSMB9//RAD17//CALR//CD36//DNMT3A//GFI1//CIITA//MSX2//PCNA//SMARCA4//STAT1//TBL1X//KLF10//TWIST1//BHLHE40//WWP2//MLXIPL//HDAC10//LCOR//RGS3//CAV2//NF1//CASK//LILRB1//BCL2//CDKN2D//IFI6//NR3C1//NME5//IRF6//CUL2//RPRM//SESN3//SIPA1//S1PR3//GNAI1//GNAI2//OPRD1//ALOX15B//CXCL1//HYAL1//EIF2AK2//WISP2//PTGES//DHRS2//TES//KLF13//PINX1//CCL5//NAB1//FBXW11//ARID5B//TPM1//RAP2C//KANK1//INTS3//EIF2B4//BRCA2/…
GO:0010035	response to inorganic substance	Biological process	16	346	271	14742	2.51554	0.000688519	0.0575408	3.16208	S100A7//NEDD4L//BCL2//S100A8//S100A9//NR3C1//PCNA//FOS//PXN//TPM1//PPP2CB//MT1F//CALR//MT1B//CD36//GART
GO:0048869	cellular developmental process	Biological process	68	2554	271	14742	1.44836	0.000718413	0.0575408	3.14363	BCL2//BRCA2//CCM2//MSX2//NF1//FOXD2//FGFR1//NTRK2//NTRK3//TWIST1//DYX1C1//STAT1//NME5//ARTN//COL4A5//PAK2//ROCK1//EZR//LGI1//TUBB3//MYL9//PLXNA4//ARHGEF18//CD36//GFI1//C11ORF9//EIF2B4//HDAC10//NAB1//PRDM12//LY6D//RASGRP4//BMP5//RASGRP1//DMRTA1//ZIC5//PAQR7//WNT2//KLF6//BLNK//CDSN//IRF6//S100A7//MFAP2//CRHR1//UPK2//RHCG//ALOX15B//MPZL2//KLF10//CDH23//CDH15//DHRS2//TPM1//ARID5B//KLK6//INSIG1//TRIB2…
GO:0050789	regulation of biological process	Biological process	172	7933	271	14742	1.17945	0.000738303	0.0575408	3.13177	PSMB9//RAD17//CDKN2D//GFI1//PCNA//CALR//CD36//DNMT3A//CIITA//MSX2//SMARCA4//STAT1//TBL1X//KLF10//TWIST1//BHLHE40//WWP2//MLXIPL//HDAC10//LCOR//FGFR1//NF1//CCL5//CAMKK2//GNAI2//PXN//RGS3//WISP2//LILRB1//TAP2//CAV2//THBS4//WNT2//BCL2//CASK//VGF//GAA//FOS//CBLB//TPM1//FBXW11//CASP1//CGA//CHRNB1//CRABP2//GAS6//GNAI1//NR3C1//CXCL1//IL1RAP//ITGAL//MGST3//PAK2//PRKACB//ROCK1//S100A9//CCL22//SIPA1//LRP8//…
GO:0010646	regulation of cell communication	Biological process	40	1292	271	14742	1.68416	0.000745267	0.0575408	3.12769	RGS3//PRKACB//CCL5//NR3C1//LILRB1//TWIST1//FGFR1//NTRK2//NMU//NF1//CAV2//FOXD2//MSX2//C11ORF9//RRAGD//RRAGC//CALR//CASP1//CD36//S100A12//LITAF//STAT1//KLK6//RASGRP4//PPP2CB//VGF//BHLHE40//GNAI2//LGI1//ITGAL//CBLB//HPSE//CRHR1//SMARCA4//GFI1//GAS6//S100A7//WNT2//BCL2//PAK2
GO:0045761	regulation of adenylate cyclase activity	Biological process	8	106	271	14742	4.10555	0.000749668	0.0575408	3.12513	CALCR//CRHR1//NTRK2//S1PR3//GNAI1//GNAI2//OPRD1//NF1
GO:0032410	negative regulation of transporter activity	Biological process	4	23	271	14742	9.46061	0.000750782	0.0575408	3.12449	GNAI2//OPRD1//TWIST1//WWP2
GO:0051412	response to corticosterone stimulus	Biological process	4	23	271	14742	9.46061	0.000750782	0.0575408	3.12449	BCL2//FOS//NR3C1//NTRK3
GO:0051926	negative regulation of calcium ion transport	Biological process	4	23	271	14742	9.46061	0.000750782	0.0575408	3.12449	BCL2//GNAI2//OPRD1//LILRB1
GO:0065007	biological regulation	Biological process	180	8387	271	14742	1.16749	0.00076559	0.0575408	3.116	PSMB9//RAD17//CDKN2D//GFI1//PCNA//CALR//CD36//DNMT3A//CIITA//MSX2//SMARCA4//STAT1//TBL1X//KLF10//TWIST1//BHLHE40//WWP2//MLXIPL//HDAC10//LCOR//FGFR1//NF1//CCL5//CAMKK2//GNAI2//PXN//RGS3//WISP2//BCL2//LILRB1//TAP2//CAV2//THBS4//WNT2//CASK//VGF//GAA//FOS//CBLB//TPM1//DAGLA//CD47//CD59//GAS6//GNAI1//GUCY1A3//ITGAL//PRKACB//TFPI//LRP8//SLC16A3//RASGRP1//HPS5//FBXW11//CASP1//CGA//CHRNB1//CRABP2//NR3C1/…
GO:0048513	organ development	Biological process	59	2141	271	14742	1.49907	0.000769551	0.0575408	3.11376	BCL2//VGF//EIF2B4//HIPK1//NF1//FOXD2//MME//ARID5B//AQP11//TMED2//NAB1//MSX2//GJA8//WNT2//GAA//TWIST1//STAT1//SMARCA4//BRCA2//NR3C1//PHGDH//PCNA//CGA//CDSN//CRABP2//S100A7//ANXA3//LRP8//PLXNA4//NTRK2//LY6D//RASGRP4//KLF6//BLNK//IRF6//MFAP2//KLF10//TUFT1//BMP5//ALOX15B//MKI67//MPZL2//INSIG1//CDH23//DHRS2//ROCK1//KLF13//SMAP1//CCL5//FGFR1//CAV2//HYAL1//HPSE//CALR//TPM1//TPH1//NTRK3//LILRB1//GART
GO:0051603	proteolysis involved in cellular protein catabolic process	Biological process	17	385	271	14742	2.40201	0.000790803	0.0581104	3.10193	ISG15//WWP2//NEDD4L//CUL2//USP20//USP18//USP49//C10ORF46//DYX1C1//ERLIN1//ERLIN2//PSMB9//FBXW11//TRIB2//PPP2CB//TBL1X//TRIM9
GO:0065008	regulation of biological quality	Biological process	62	2286	271	14742	1.47538	0.000826786	0.0597248	3.08261	PCNA//BCL2//GAA//TPM1//DAGLA//CD36//CD47//CD59//GAS6//GNAI1//GNAI2//GUCY1A3//ITGAL//PRKACB//TFPI//LRP8//SLC16A3//RASGRP1//HPS5//CALR//CGA//RHCG//CCL5//ABCG2//NEDD4L//PINX1//EZR//CALCR//CRHR1//S1PR3//SSH2//DHRS2//NR3C1//ARHGEF18//MLXIPL//FKBP1B//PCLO//NMU//EIF2AK2//NTRK3//TAP2//NF1//C11ORF9//VGF//HPSE//KANK1//BRCA2//FBXW11//CHRNB1//KLK6//NAB1//EIF2B4//CRABP2//SMARCA4//KLF13//SMAP1//BHLHE40//AQP11/…
GO:0031279	regulation of cyclase activity	Biological process	8	108	271	14742	4.02952	0.00084798	0.0602349	3.07161	CALCR//CRHR1//NTRK2//S1PR3//GNAI1//GNAI2//OPRD1//NF1
GO:0009314	response to radiation	Biological process	14	291	271	14742	2.61711	0.00101019	0.0686389	2.9956	PLEKHB1//CRHR1//NF1//CDKN2D//FOS//BHLHE40//NMU//SCARA3//BRCA2//INTS3//BCL2//MME//HYAL1//NR3C1
GO:0042060	wound healing	Biological process	23	615	271	14742	2.03442	0.001011	0.0686389	2.99525	DAGLA//CD36//CD47//CD59//GAS6//GNAI1//GNAI2//GUCY1A3//ITGAL//PRKACB//TFPI//LRP8//SLC16A3//RASGRP1//HPS5//HPSE//MSX2//KLK6//CASK//KLF6//NF1//S100A8//TPM1
GO:0051339	regulation of lyase activity	Biological process	8	111	271	14742	3.92061	0.00101461	0.0686389	2.9937	CALCR//CRHR1//NTRK2//S1PR3//GNAI1//GNAI2//OPRD1//NF1
GO:0044257	cellular protein catabolic process	Biological process	17	395	271	14742	2.3412	0.00104793	0.0693488	2.97967	ISG15//WWP2//NEDD4L//PSMB9//CUL2//USP20//USP18//USP49//C10ORF46//DYX1C1//ERLIN1//ERLIN2//FBXW11//TRIB2//PPP2CB//TBL1X//TRIM9
GO:0016477	cell migration	Biological process	26	734	271	14742	1.92692	0.00105764	0.0693488	2.97566	FOXD2//FGFR1//NTRK2//NTRK3//TWIST1//DYX1C1//CCL5//ANXA3//HYAL1//ARID5B//S100A7//BCL2//LRP8//CXCL16//ALOX15B//NF1//TPM1//RAP2C//S100A9//MSX2//CD47//GAS6//ITGAL//ROCK1//SLC16A3//THBS4
GO:0045765	regulation of angiogenesis	Biological process	9	139	271	14742	3.52221	0.00107498	0.0694178	2.9686	NF1//ROCK1//STAT1//THBS4//ANXA3//HYAL1//CCL5//TWIST1//HIPK1
GO:0006695	cholesterol biosynthetic process	Biological process	5	43	271	14742	6.32541	0.00110006	0.0699771	2.95858	IDI1//INSIG1//LSS//MVK//SQLE
GO:0050794	regulation of cellular process	Biological process	163	7509	271	14742	1.18084	0.0013041	0.0817362	2.88469	PSMB9//RAD17//CDKN2D//GFI1//PCNA//CALR//CD36//DNMT3A//CIITA//MSX2//SMARCA4//STAT1//TBL1X//KLF10//TWIST1//BHLHE40//WWP2//MLXIPL//HDAC10//LCOR//FGFR1//NF1//CCL5//CAMKK2//GNAI2//PXN//RGS3//WISP2//LILRB1//TAP2//CAV2//THBS4//WNT2//BCL2//CASK//FOS//FBXW11//CASP1//CBLB//CGA//CHRNB1//CRABP2//GAS6//GNAI1//NR3C1//CXCL1//IL1RAP//ITGAL//MGST3//PAK2//PRKACB//ROCK1//S100A9//CCL22//SIPA1//LRP8//RASSF7//CLIC3//A…
GO:0010647	positive regulation of cell communication	Biological process	24	669	271	14742	1.95152	0.0013883	0.084785	2.85752	CCL5//FGFR1//NTRK2//CAV2//FOXD2//MSX2//RRAGD//RRAGC//CASP1//CD36//S100A12//LITAF//KLK6//RASGRP4//LGI1//NMU//ITGAL//HPSE//CRHR1//GFI1//GAS6//S100A7//WNT2//PAK2
GO:0019941	modification-dependent protein catabolic process	Biological process	16	370	271	14742	2.35237	0.00139253	0.084785	2.8562	WWP2//NEDD4L//CUL2//USP20//USP18//USP49//C10ORF46//ERLIN1//ERLIN2//PSMB9//FBXW11//TRIB2//PPP2CB//TBL1X//TRIM9//ISG15
GO:0009605	response to external stimulus	Biological process	37	1209	271	14742	1.6648	0.00146761	0.0880981	2.83339	CCL5//CXCL1//S100A8//S100A9//CCL22//CXCL16//FOS//COL4A5//FGFR1//PAK2//ROCK1//EZR//ARTN//LGI1//TUBB3//MYL9//PLXNA4//BCL2//BRCA2//GNAI2//PLEKHB1//RASGRP4//S100A7//CASP1//CD36//HPSE//CRHR1//CDKN2D//KYNU//BHLHE40//NTRK3//FOXD2//NT5E//CDH23//CASK//WNT2//THBS4
GO:0043632	modification-dependent macromolecule catabolic process	Biological process	16	373	271	14742	2.33345	0.00151295	0.0881272	2.82017	ISG15//WWP2//NEDD4L//CUL2//USP20//USP18//USP49//C10ORF46//ERLIN1//ERLIN2//PSMB9//FBXW11//TRIB2//PPP2CB//TBL1X//TRIM9
GO:0009123	nucleoside monophosphate metabolic process	Biological process	11	206	271	14742	2.90478	0.00152329	0.0881272	2.81722	GUCY1A3//GART//NT5E//CALCR//CRHR1//NTRK2//S1PR3//GNAI1//GNAI2//OPRD1//NF1
GO:0010224	response to UV-B	Biological process	3	13	271	14742	12.5535	0.00153276	0.0881272	2.81453	HYAL1//MME//BCL2
GO:0023056	positive regulation of signaling	Biological process	24	675	271	14742	1.93417	0.00156414	0.0881272	2.80572	CCL5//FGFR1//NTRK2//CAV2//FOXD2//MSX2//RRAGD//RRAGC//CASP1//CD36//S100A12//LITAF//KLK6//RASGRP4//LGI1//NMU//ITGAL//HPSE//CRHR1//GFI1//GAS6//S100A7//WNT2//PAK2
GO:0048522	positive regulation of cellular process	Biological process	72	2821	271	14742	1.38841	0.00157668	0.0881272	2.80226	LILRB1//TAP2//NF1//THBS4//WNT2//CD36//STAT1//NR3C1//ALOX15B//KLF10//PSMB9//CALCR//CRHR1//NTRK2//CALR//CD47//S1PR3//FGFR1//GNAI2//MLXIPL//SP6//IFI27//ARHGEF9//ARHGEF18//BCL2//CUL2//CCL5//ANXA3//HYAL1//TWIST1//S100A7//BRCA2//C11ORF9//KLF6//FOS//IRF6//CIITA//SMARCA4//TBL1X//TBP//CAMKK2//FBXW11//NMU//ITGAL//CAV2//LGI1//CXCL16//FOXD2//MSX2//PAK2//RAP2C//RRAGD//RRAGC//TRIB2//HPSE//CASP1//S100A12//LITAF…
GO:0040008	regulation of growth	Biological process	19	484	271	14742	2.13548	0.00159216	0.0881272	2.79801	WISP2//VGF//BCL2//HYAL1//LGI1//CXCL16//CDKN2D//SIPA1//SMARCA4//CD36//ALOX15B//MT1B//MT1F//CGA//NTRK3//PLXNA4//WNT2//GAS6//PAK2
GO:0051385	response to mineralocorticoid stimulus	Biological process	4	28	271	14742	7.77122	0.00161523	0.0882579	2.79177	BCL2//FOS//NR3C1//NTRK3
GO:0010001	glial cell differentiation	Biological process	8	120	271	14742	3.62657	0.00167656	0.0882738	2.77558	C11ORF9//EIF2B4//HDAC10//NAB1//NF1//BCL2//NTRK3//FOXD2
GO:0051707	response to other organism	Biological process	20	524	271	14742	2.07628	0.00168565	0.0882738	2.77323	LILRB1//ANXA3//S100A12//CST11//HYAL1//EIF2AK2//CCL5//CCL22//STAT1//ISG15//IRF9//CD36//S100A7//FOS//S100A8//S100A9//PAK2//BCL2//OAS1//GFI1
GO:0009124	nucleoside monophosphate biosynthetic process	Biological process	10	178	271	14742	3.0561	0.00169837	0.0882738	2.76997	GUCY1A3//GART//CALCR//CRHR1//NTRK2//S1PR3//GNAI1//GNAI2//OPRD1//NF1
GO:0045926	negative regulation of growth	Biological process	10	178	271	14742	3.0561	0.00169837	0.0882738	2.76997	BCL2//CDKN2D//HYAL1//SIPA1//SMARCA4//CD36//CGA//ALOX15B//MT1B//MT1F
GO:0009190	cyclic nucleotide biosynthetic process	Biological process	9	149	271	14742	3.28582	0.00174596	0.0896538	2.75797	GUCY1A3//CALCR//CRHR1//NTRK2//S1PR3//GNAI1//GNAI2//OPRD1//NF1
GO:0071346	cellular response to interferon-gamma	Biological process	7	95	271	14742	4.00831	0.00183139	0.0929213	2.73722	IRF6//CIITA//OAS1//OAS2//STAT1//IRF9//CCL5
GO:0007275	multicellular organismal development	Biological process	89	3675	271	14742	1.31741	0.00191278	0.0959092	2.71833	BMP5//FGFR1//KLF10//S100A7//SLC12A6//BCL2//VGF//EIF2B4//CCM2//HIPK1//NF1//TWIST1//FOXD2//NTRK2//NTRK3//DYX1C1//MME//ARID5B//AQP11//BRCA2//TMED2//NAB1//MSX2//GJA8//WNT2//CBLB//GAA//STAT1//SMARCA4//FOS//CXCL1//THBS4//LGI1//ZIC5//PLXNA4//ARTN//COL4A5//PAK2//ROCK1//EZR//TUBB3//MYL9//KLK6//NR3C1//PHGDH//PCNA//CGA//CDSN//CRABP2//GFI1//C11ORF9//HDAC10//ANXA3//LRP8//PRDM12//LY6D//RASGRP4//KLF6//BLNK//IRF…
GO:0035556	intracellular signal transduction	Biological process	51	1855	271	14742	1.49559	0.00197381	0.0976239	2.70469	FGFR1//NF1//CCL5//CAMKK2//PSMB9//BRCA2//OPRD1//CRHR1//PRKACB//CALCR//S1PR3//GNAI1//GNAI2//MLXIPL//STAT1//CD36//GUCY1A3//ARL4A//TNK2//ARHGEF9//ARHGEF18//RAB40C//RAP2C//RRAGC//RASGRP1//ROCK1//FKBP1B//TWIST1//NTRK2//PCNA//RRAGD//ITSN2//FBXW11//CASP1//S100A12//LITAF//RASGRP4//PPP2CB//ITGAL//SIPA1//FOS//CCM2//HPSE//GAS6//S100A7//CBLB//CXCL1//WSB1//BLNK
GO:0016126	sterol biosynthetic process	Biological process	5	49	271	14742	5.55087	0.00199279	0.0976239	2.70054	IDI1//INSIG1//LSS//MVK//SQLE
GO:0009719	response to endogenous stimulus	Biological process	28	853	271	14742	1.78565	0.00211716	0.101828	2.67425	FGFR1//SORBS1//PPP2CB//PRKACB//CBLB//RBM14//DNMT3A//RRAGD//RRAGC//BRCA2//CALR//PRDM2//FOS//BCL2//NR3C1//CCL5//VGF//CGA//STAT1//EIF2B4//ANXA3//CALCR//NTRK3//CD36//PXN//CRHR1//MSX2//WNT2
GO:0050793	regulation of developmental process	Biological process	37	1235	271	14742	1.62975	0.00212639	0.101828	2.67236	CBLB//STAT1//NF1//EZR//ARHGEF18//TWIST1//CD36//NTRK2//GFI1//BCL2//ROCK1//THBS4//ALOX15B//C11ORF9//BRCA2//KLF10//FGFR1//KLK6//INSIG1//MSX2//TRIB2//KLF13//SMAP1//CALR//CCL5//NAB1//ANXA3//HYAL1//HIPK1//NTRK3//PLXNA4//SSH2//CDH15//HPSE//WNT2//FOXD2//LILRB1
GO:0000122	negative regulation of transcription from RNA polymerase II promoter	Biological process	17	424	271	14742	2.18107	0.00222871	0.105542	2.65195	CALR//CD36//DNMT3A//GFI1//CIITA//MSX2//PCNA//SMARCA4//STAT1//TBL1X//KLF10//TWIST1//BHLHE40//WWP2//MLXIPL//HDAC10//LCOR
GO:0033688	regulation of osteoblast proliferation	Biological process	3	15	271	14742	10.8797	0.00237303	0.111026	2.6247	BCL2//EIF2AK2//HPSE
GO:0030817	regulation of cAMP biosynthetic process	Biological process	8	127	271	14742	3.42668	0.00239662	0.111026	2.6204	CALCR//CRHR1//NTRK2//S1PR3//GNAI1//GNAI2//OPRD1//NF1
GO:0055082	cellular chemical homeostasis	Biological process	20	542	271	14742	2.00733	0.00249589	0.114381	2.60278	CALR//RHCG//CCL5//ABCG2//NEDD4L//CALCR//CRHR1//S1PR3//MLXIPL//BCL2//FKBP1B//C11ORF9//NF1//CHRNB1//NAB1//KLK6//EIF2B4//AQP11//CDH23//IFI6
GO:0001952	regulation of cell-matrix adhesion	Biological process	5	52	271	14742	5.23063	0.00259752	0.114875	2.58544	NF1//CASK//CD36//ROCK1//BCL2
GO:0048709	oligodendrocyte differentiation	Biological process	5	52	271	14742	5.23063	0.00259752	0.114875	2.58544	C11ORF9//EIF2B4//HDAC10//NF1//BCL2
GO:0044403	symbiosis, encompassing mutualism through parasitism	Biological process	7	101	271	14742	3.77019	0.00259791	0.114875	2.58538	EIF2AK2//NTRK3//TAP2//CD36//CCL5//SMARCA4//WWP2
GO:0006171	cAMP biosynthetic process	Biological process	8	129	271	14742	3.37355	0.00264143	0.114875	2.57816	CALCR//CRHR1//NTRK2//S1PR3//GNAI1//GNAI2//OPRD1//NF1
GO:0030814	regulation of cAMP metabolic process	Biological process	8	129	271	14742	3.37355	0.00264143	0.114875	2.57816	CALCR//CRHR1//NTRK2//S1PR3//GNAI1//GNAI2//OPRD1//NF1
GO:0030163	protein catabolic process	Biological process	18	469	271	14742	2.08779	0.00267829	0.115302	2.57214	ISG15//WWP2//NEDD4L//PSMB9//CUL2//USP20//USP18//USP49//C10ORF46//DYX1C1//ERLIN1//ERLIN2//FBXW11//TRIB2//PPP2CB//TBL1X//TRIM9//CBLB
GO:0006873	cellular ion homeostasis	Biological process	19	511	271	14742	2.02265	0.00292479	0.122741	2.53391	CALR//CCL5//ABCG2//NEDD4L//CALCR//CRHR1//S1PR3//BCL2//FKBP1B//C11ORF9//NF1//CHRNB1//NAB1//KLK6//EIF2B4//AQP11//CDH23//IFI6//RHCG
GO:0048870	cell motility	Biological process	26	791	271	14742	1.78807	0.00298638	0.122741	2.52485	FOXD2//FGFR1//NTRK2//NTRK3//TWIST1//DYX1C1//CCL5//ANXA3//HYAL1//ARID5B//S100A7//BCL2//LRP8//CXCL16//ALOX15B//NF1//TPM1//RAP2C//S100A9//MSX2//CD47//GAS6//ITGAL//ROCK1//SLC16A3//THBS4
GO:0051674	localization of cell	Biological process	26	791	271	14742	1.78807	0.00298638	0.122741	2.52485	FOXD2//FGFR1//NTRK2//NTRK3//TWIST1//DYX1C1//CCL5//ANXA3//HYAL1//ARID5B//S100A7//BCL2//LRP8//CXCL16//ALOX15B//NF1//TPM1//RAP2C//S100A9//MSX2//CD47//GAS6//ITGAL//ROCK1//SLC16A3//THBS4
GO:0006511	ubiquitin-dependent protein catabolic process	Biological process	15	363	271	14742	2.24787	0.0030065	0.122741	2.52194	WWP2//NEDD4L//ERLIN1//ERLIN2//PSMB9//FBXW11//TRIB2//PPP2CB//TBL1X//TRIM9//CUL2//USP20//USP18//USP49//C10ORF46
GO:0031324	negative regulation of cellular metabolic process	Biological process	34	1130	271	14742	1.63677	0.00302236	0.122741	2.51965	CALR//CD36//DNMT3A//GFI1//CIITA//MSX2//PCNA//SMARCA4//STAT1//TBL1X//KLF10//TWIST1//BHLHE40//WWP2//MLXIPL//HDAC10//LCOR//S1PR3//GNAI1//GNAI2//OPRD1//RAD17//NAB1//FBXW11//ARID5B//EIF2B4//CDKN2D//LILRB1//CCL5//TRIB2//INSIG1//C1QTNF3//BRCA2//PSMB9
GO:0009653	anatomical structure morphogenesis	Biological process	50	1847	271	14742	1.47262	0.00302549	0.122741	2.5192	BCL2//S100A7//SLC12A6//CCM2//TWIST1//TMED2//NAB1//GAA//MSX2//STAT1//COL4A5//FGFR1//PAK2//ROCK1//EZR//ARTN//LGI1//TUBB3//MYL9//PLXNA4//ARHGEF18//NF1//THBS4//LRP8//MFAP2//ANXA3//MKI67//CRABP2//KLK6//INSIG1//CDH23//TUFT1//CDSN//TPM1//HYAL1//CCL5//HIPK1//ARID5B//NTRK3//PXN//FOXD2//SSH2//NTRK2//WNT2//NR3C1//HPSE//CD36//S1PR3//MPZL2//MLXIPL
GO:0060429	epithelium development	Biological process	19	513	271	14742	2.01476	0.00305269	0.122741	2.51532	BCL2//TWIST1//TMED2//STAT1//CDSN//IRF6//S100A7//CRHR1//UPK2//EZR//RHCG//ALOX15B//BRCA2//ROCK1//MSX2//WNT2//NR3C1//FOXD2//CCM2
GO:0009607	response to biotic stimulus	Biological process	20	554	271	14742	1.96385	0.00320143	0.127519	2.49466	LILRB1//ANXA3//S100A12//CST11//HYAL1//EIF2AK2//CCL5//CCL22//STAT1//ISG15//IRF9//CD36//S100A7//FOS//S100A8//S100A9//PAK2//BCL2//OAS1//GFI1
GO:0060333	interferon-gamma-mediated signaling pathway	Biological process	6	79	271	14742	4.13153	0.0033071	0.130508	2.48055	STAT1//IRF6//CIITA//OAS1//OAS2//IRF9
GO:0007159	leukocyte cell-cell adhesion	Biological process	4	34	271	14742	6.39983	0.00335625	0.131233	2.47415	ROCK1//ITGAL//CCL5//EZR
GO:0002544	chronic inflammatory response	Biological process	3	17	271	14742	9.59974	0.00345149	0.13373	2.46199	CCL5//S100A8//S100A9
GO:0030802	regulation of cyclic nucleotide biosynthetic process	Biological process	8	135	271	14742	3.22362	0.00349469	0.134184	2.45659	CALCR//CRHR1//NTRK2//S1PR3//GNAI1//GNAI2//OPRD1//NF1
GO:0021782	glial cell development	Biological process	5	56	271	14742	4.85701	0.00359755	0.136667	2.44399	C11ORF9//EIF2B4//HDAC10//NF1//FOXD2
GO:0007160	cell-matrix adhesion	Biological process	8	136	271	14742	3.19991	0.00365556	0.136667	2.43705	BCL2//NF1//CASK//CD36//PXN//SORBS1//ROCK1//HPSE
GO:0030808	regulation of nucleotide biosynthetic process	Biological process	8	136	271	14742	3.19991	0.00365556	0.136667	2.43705	CALCR//CRHR1//NTRK2//S1PR3//GNAI1//GNAI2//OPRD1//NF1
GO:0045682	regulation of epidermis development	Biological process	4	35	271	14742	6.21697	0.00373537	0.138436	2.42767	ROCK1//MSX2//HPSE//NAB1
GO:0051336	regulation of hydrolase activity	Biological process	25	764	271	14742	1.78006	0.00379239	0.139338	2.42109	CASP1//IFI27//CALR//CRHR1//OPRD1//PRKACB//RASGRP4//FGFR1//CAST//SLPI//TFPI//TMED2//CCL5//PCNA//SMAP1//NTRK2//NF1//FKBP1B//TPM1//SIPA1//CDKN2D//IFI6//RGS3//OAS1//PAK2
GO:0065009	regulation of molecular function	Biological process	49	1823	271	14742	1.46217	0.00385341	0.140369	2.41416	CDKN2D//GNAI2//PXN//RGS3//NF1//PAK2//TRIB2//CASP1//IFI27//CALR//CALCR//CRHR1//NTRK2//S1PR3//GNAI1//OPRD1//PRKACB//RASGRP4//FGFR1//CCL5//CAST//SLPI//TFPI//GFI1//TMED2//BCL2//PCNA//SMAP1//WWP2//FKBP1B//TPM1//MSX2//SIPA1//CXCL1//IFI6//TWIST1//BHLHE40//CAMKK2//LRP8//FOXD2//FOS//ANXA3//SMARCA4//WNT2//ARID5B//PSMB9//PINX1//OAS1//RAP2C
GO:0000302	response to reactive oxygen species	Biological process	7	109	271	14742	3.49348	0.00397773	0.142568	2.40036	FOS//PXN//TPM1//BCL2//PPP2CB//CD36//S100A7
GO:0032409	regulation of transporter activity	Biological process	6	82	271	14742	3.98038	0.00398066	0.142568	2.40004	BCL2//WWP2//GNAI2//OPRD1//FKBP1B//TWIST1
GO:0046058	cAMP metabolic process	Biological process	8	139	271	14742	3.13085	0.00417274	0.145658	2.37958	CALCR//CRHR1//NTRK2//S1PR3//GNAI1//GNAI2//OPRD1//NF1
GO:0007188	G-protein signaling, coupled to cAMP nucleotide second messenger	Biological process	7	110	271	14742	3.46172	0.00418306	0.145658	2.37851	CALCR//CRHR1//S1PR3//GNAI1//GNAI2//OPRD1//PRKACB
GO:0045934	negative regulation of nucleobase-containing compound metabolic process	Biological process	27	854	271	14742	1.71986	0.0042309	0.145658	2.37357	CALR//CD36//DNMT3A//GFI1//CIITA//MSX2//PCNA//SMARCA4//STAT1//TBL1X//KLF10//TWIST1//BHLHE40//WWP2//MLXIPL//HDAC10//LCOR//S1PR3//GNAI1//GNAI2//OPRD1//RAD17//NAB1//FBXW11//ARID5B//CCL5//BRCA2
GO:0009187	cyclic nucleotide metabolic process	Biological process	9	170	271	14742	2.87992	0.00423486	0.145658	2.37316	GUCY1A3//CALCR//CRHR1//NTRK2//S1PR3//GNAI1//GNAI2//OPRD1//NF1
GO:0009888	tissue development	Biological process	33	1111	271	14742	1.6158	0.00423783	0.145658	2.37286	BCL2//FOXD2//TWIST1//TMED2//MSX2//STAT1//NF1//CDSN//CRABP2//S100A7//IRF6//KLF10//TUFT1//CRHR1//UPK2//EZR//RHCG//ALOX15B//BRCA2//KLK6//ROCK1//NAB1//CAV2//BMP5//HYAL1//HPSE//CALR//WNT2//GAA//TPM1//NR3C1//ARID5B//CCM2
GO:0009615	response to virus	Biological process	11	236	271	14742	2.53552	0.00435461	0.146721	2.36105	LILRB1//PAK2//BCL2//OAS1//HYAL1//EIF2AK2//CCL5//CCL22//STAT1//ISG15//IRF9
GO:0042063	gliogenesis	Biological process	8	140	271	14742	3.10849	0.0043571	0.146721	2.3608	C11ORF9//EIF2B4//HDAC10//NAB1//NF1//BCL2//NTRK3//FOXD2
GO:0051704	multi-organism process	Biological process	30	985	271	14742	1.65681	0.00446414	0.146721	2.35026	LILRB1//ANXA3//S100A12//CST11//HYAL1//EIF2AK2//CCL5//CCL22//STAT1//ISG15//IRF9//BCL2//CRHR1//FOS//CD36//S100A7//NTRK3//TAP2//S100A8//S100A9//VGF//SMARCA4//PAK2//PSMB9//TBP//CUL2//WWP2//NEDD4L//OAS1//GFI1
GO:0014065	phosphatidylinositol 3-kinase cascade	Biological process	5	59	271	14742	4.61004	0.00450998	0.146721	2.34583	TWIST1//FGFR1//NTRK2//CCL5//NF1
GO:0048468	cell development	Biological process	37	1292	271	14742	1.55785	0.00451923	0.146721	2.34494	BRCA2//FOXD2//MSX2//STAT1//NME5//NF1//COL4A5//FGFR1//PAK2//ROCK1//EZR//ARTN//LGI1//TUBB3//MYL9//PLXNA4//TWIST1//NTRK2//GFI1//C11ORF9//EIF2B4//HDAC10//BCL2//KLF10//TPM1//CALR//CCL5//NTRK3//CAV2//CHRNB1//THBS4//SSH2//CDH23//WNT2//LILRB1//IRF6//ARID5B
GO:0006928	cellular component movement	Biological process	31	1029	271	14742	1.63883	0.00452509	0.146721	2.34437	FOXD2//FGFR1//NTRK2//NTRK3//TWIST1//DYX1C1//CCL5//KIFC3//TUBB3//DYNLRB2//ANXA3//HYAL1//ARID5B//S100A7//BCL2//LRP8//TPM1//CXCL16//ALOX15B//NF1//RAP2C//S100A9//MSX2//PLXNA4//CD47//GAS6//ITGAL//ROCK1//SLC16A3//THBS4//PXN
GO:0030799	regulation of cyclic nucleotide metabolic process	Biological process	8	141	271	14742	3.08644	0.00454767	0.146721	2.34221	CALCR//CRHR1//NTRK2//S1PR3//GNAI1//GNAI2//OPRD1//NF1
GO:0009966	regulation of signal transduction	Biological process	43	1563	271	14742	1.49657	0.00456765	0.146721	2.34031	PXN//RGS3//USP20//RASGRP4//CCL5//HIPK1//TWIST1//FGFR1//NTRK2//CAV2//NR3C1//FOXD2//MSX2//RRAGD//RRAGC//SMAP1//NF1//SIPA1//CALR//DYX1C1//GFI1//ARHGEF9//ARHGEF18//ITSN2//CASP1//CD36//S100A12//LITAF//STAT1//TRIB2//KLK6//PPP2CB//ITGAL//CBLB//RASGRP1//HPSE//USP18//SMARCA4//GAS6//S100A7//WNT2//BCL2//PAK2
GO:0048041	focal adhesion assembly	Biological process	4	37	271	14742	5.88092	0.00457857	0.146721	2.33927	ROCK1//BCL2//PXN//SORBS1
GO:0033687	osteoblast proliferation	Biological process	3	19	271	14742	8.58924	0.00478685	0.148971	2.31995	BCL2//EIF2AK2//HPSE
GO:0045071	negative regulation of viral genome replication	Biological process	3	19	271	14742	8.58924	0.00478685	0.148971	2.31995	OAS1//CCL5//SLPI
GO:0048525	negative regulation of viral reproduction	Biological process	3	19	271	14742	8.58924	0.00478685	0.148971	2.31995	OAS1//CCL5//SLPI
GO:0051172	negative regulation of nitrogen compound metabolic process	Biological process	27	862	271	14742	1.7039	0.00478859	0.148971	2.31979	CALR//CD36//DNMT3A//GFI1//CIITA//MSX2//PCNA//SMARCA4//STAT1//TBL1X//KLF10//TWIST1//BHLHE40//WWP2//MLXIPL//HDAC10//LCOR//S1PR3//GNAI1//GNAI2//OPRD1//RAD17//NAB1//FBXW11//ARID5B//CCL5//BRCA2
GO:0030155	regulation of cell adhesion	Biological process	11	240	271	14742	2.49327	0.00493443	0.152395	2.30676	BCL2//NF1//CASK//CD36//SIPA1//CD47//ITGAL//CCL5//HYAL1//TPM1//ROCK1
GO:0009411	response to UV	Biological process	6	86	271	14742	3.79525	0.00503031	0.154239	2.29841	SCARA3//BCL2//BRCA2//MME//HYAL1//CDKN2D
GO:0044092	negative regulation of molecular function	Biological process	22	660	271	14742	1.81328	0.0052447	0.159664	2.28028	RGS3//NF1//PAK2//TRIB2//S1PR3//GNAI1//GNAI2//OPRD1//CAST//SLPI//TFPI//GFI1//TMED2//WWP2//FKBP1B//MSX2//CDKN2D//IFI6//TWIST1//BHLHE40//PSMB9//PINX1
GO:0048518	positive regulation of biological process	Biological process	75	3104	271	14742	1.3144	0.00536	0.162017	2.27084	LILRB1//TAP2//NF1//THBS4//WNT2//CD36//STAT1//FOS//CBLB//TPM1//NR3C1//ALOX15B//KLF10//PSMB9//CALCR//CRHR1//NTRK2//CALR//CD47//S1PR3//FGFR1//GNAI2//MLXIPL//SP6//IFI27//ARHGEF9//ARHGEF18//BCL2//CUL2//NMU//CCL5//HPSE//ANXA3//TWIST1//TMED2//HYAL1//S100A7//SORBS1//BRCA2//C11ORF9//KLF6//IRF6//CIITA//SMARCA4//TBL1X//TBP//CAMKK2//FBXW11//ITGAL//CAV2//PAK2//LGI1//CXCL16//FOXD2//MSX2//RAP2C//RRAGD//RRAGC//T…
GO:2000026	regulation of multicellular organismal development	Biological process	29	957	271	14742	1.64844	0.00553236	0.163305	2.25709	CBLB//STAT1//NF1//TWIST1//NTRK2//GFI1//BCL2//ROCK1//THBS4//ALOX15B//C11ORF9//BRCA2//MSX2//KLF13//SMAP1//CALR//FGFR1//CCL5//KLF10//NAB1//ANXA3//HYAL1//HIPK1//NTRK3//PLXNA4//SSH2//HPSE//WNT2//FOXD2
GO:0007090	regulation of S phase of mitotic cell cycle	Biological process	3	20	271	14742	8.15978	0.00555589	0.163305	2.25525	SMARCA4//HYAL1//BRCA2
GO:0048247	lymphocyte chemotaxis	Biological process	3	20	271	14742	8.15978	0.00555589	0.163305	2.25525	S100A7//CCL5//CXCL16
GO:0052312	modulation of transcription in other organism involved in symbiotic interaction	Biological process	3	20	271	14742	8.15978	0.00555589	0.163305	2.25525	NTRK3//CCL5//SMARCA4
GO:0019725	cellular homeostasis	Biological process	21	624	271	14742	1.83072	0.00569102	0.166131	2.24481	CALR//RHCG//CCL5//ABCG2//NEDD4L//CALCR//CRHR1//S1PR3//MLXIPL//BCL2//FKBP1B//C11ORF9//NF1//CHRNB1//NAB1//KLK6//EIF2B4//GAA//AQP11//CDH23//IFI6
GO:0061180	mammary gland epithelium development	Biological process	5	63	271	14742	4.31734	0.00596794	0.17303	2.22418	BRCA2//MSX2//NR3C1//IRF6//WNT2
GO:0010498	proteasomal protein catabolic process	Biological process	10	213	271	14742	2.55392	0.00611905	0.175372	2.21332	DYX1C1//ERLIN1//ERLIN2//PSMB9//FBXW11//TRIB2//PPP2CB//TBL1X//WWP2//TRIM9
GO:0009057	macromolecule catabolic process	Biological process	25	794	271	14742	1.7128	0.00615485	0.175372	2.21078	SMG7//RNPS1//ISG15//WWP2//NEDD4L//XRN1//GAA//PGM1//OAS2//PSMB9//CUL2//USP20//USP18//USP49//C10ORF46//DYX1C1//HYAL1//ERLIN1//ERLIN2//FBXW11//TRIB2//PPP2CB//TBL1X//TRIM9//CBLB
GO:0009892	negative regulation of metabolic process	Biological process	35	1228	271	14742	1.55045	0.00617216	0.175372	2.20956	CALR//CD36//DNMT3A//GFI1//CIITA//MSX2//PCNA//SMARCA4//STAT1//TBL1X//KLF10//TWIST1//BHLHE40//WWP2//MLXIPL//HDAC10//LCOR//S1PR3//GNAI1//GNAI2//OPRD1//RAD17//INSIG1//NAB1//FBXW11//ARID5B//ADAR//EIF2B4//CDKN2D//LILRB1//CCL5//TRIB2//C1QTNF3//BRCA2//PSMB9
GO:0042552	myelination	Biological process	5	64	271	14742	4.24988	0.0063787	0.18004	2.19527	C11ORF9//NF1//NAB1//KLK6//EIF2B4
GO:0019932	second-messenger-mediated signaling	Biological process	12	284	271	14742	2.29853	0.00642095	0.18004	2.1924	OPRD1//CRHR1//PRKACB//CALCR//S1PR3//GNAI1//GNAI2//CAMKK2//CD36//GUCY1A3//FKBP1B//ITGAL
GO:0034599	cellular response to oxidative stress	Biological process	6	91	271	14742	3.58672	0.00661203	0.183138	2.17967	FOS//PXN//TPM1//CD36//CCL5//DHRS2
GO:0022603	regulation of anatomical structure morphogenesis	Biological process	18	512	271	14742	1.91245	0.00661738	0.183138	2.17931	STAT1//EZR//ARHGEF18//TWIST1//NF1//ROCK1//THBS4//ANXA3//HYAL1//CCL5//HIPK1//BCL2//NTRK3//PLXNA4//SSH2//NTRK2//WNT2//CD36
GO:0016337	cell-cell adhesion	Biological process	14	359	271	14742	2.12139	0.0067482	0.185554	2.17081	ITGAL//CDH15//PCDH7//MPZL2//CDH26//CDH23//ROCK1//CCL5//EZR//CD47//THBS4//KIFC3//BCL2//CDSN
GO:0009967	positive regulation of signal transduction	Biological process	21	637	271	14742	1.79336	0.00714047	0.195081	2.14627	CCL5//FGFR1//NTRK2//CAV2//FOXD2//MSX2//RRAGD//RRAGC//CASP1//CD36//S100A12//LITAF//KLK6//RASGRP4//ITGAL//HPSE//GFI1//GAS6//S100A7//WNT2//PAK2
GO:0001937	negative regulation of endothelial cell proliferation	Biological process	3	22	271	14742	7.41798	0.00730517	0.19831	2.13637	CAV2//NF1//STAT1
GO:0031644	regulation of neurological system process	Biological process	9	187	271	14742	2.61811	0.00779609	0.208902	2.10812	NF1//C11ORF9//VGF//BHLHE40//GNAI2//LGI1//NMU//OPRD1//CRHR1
GO:0032496	response to lipopolysaccharide	Biological process	9	187	271	14742	2.61811	0.00779609	0.208902	2.10812	CCL5//STAT1//CD36//GFI1//LILRB1//FOS//S100A7//S100A8//S100A9
GO:0006979	response to oxidative stress	Biological process	10	221	271	14742	2.46147	0.00785618	0.208902	2.10479	S100A7//DHRS2//FOS//PXN//TPM1//BCL2//PPP2CB//CD36//CCL5//SCARA3
GO:0048732	gland development	Biological process	11	256	271	14742	2.33744	0.00789142	0.208902	2.10285	BCL2//NR3C1//NF1//ARID5B//ALOX15B//CGA//BRCA2//MSX2//IRF6//TPH1//WNT2
GO:0007272	ensheathment of neurons	Biological process	5	68	271	14742	3.99989	0.00822076	0.21495	2.08509	C11ORF9//NF1//NAB1//KLK6//EIF2B4
GO:0008366	axon ensheathment	Biological process	5	68	271	14742	3.99989	0.00822076	0.21495	2.08509	C11ORF9//NF1//NAB1//KLK6//EIF2B4
GO:0006935	chemotaxis	Biological process	19	565	271	14742	1.82933	0.00842573	0.216028	2.07439	CCL5//COL4A5//FGFR1//PAK2//ROCK1//EZR//ARTN//LGI1//TUBB3//MYL9//PLXNA4//S100A7//S100A9//CXCL16//FOXD2//THBS4//CXCL1//S100A8//CCL22
GO:0042330	taxis	Biological process	19	565	271	14742	1.82933	0.00842573	0.216028	2.07439	CCL5//CXCL1//S100A8//S100A9//CCL22//CXCL16//COL4A5//FGFR1//PAK2//ROCK1//EZR//ARTN//LGI1//TUBB3//MYL9//PLXNA4//S100A7//FOXD2//THBS4
GO:0050801	ion homeostasis	Biological process	19	565	271	14742	1.82933	0.00842573	0.216028	2.07439	CALR//RHCG//CCL5//ABCG2//NEDD4L//CALCR//CRHR1//S1PR3//BCL2//FKBP1B//C11ORF9//NF1//CHRNB1//NAB1//KLK6//EIF2B4//AQP11//CDH23//IFI6
GO:0043086	negative regulation of catalytic activity	Biological process	18	525	271	14742	1.86509	0.00846994	0.216028	2.07212	RGS3//NF1//PAK2//TRIB2//S1PR3//GNAI1//GNAI2//OPRD1//CAST//SLPI//TFPI//GFI1//TMED2//FKBP1B//CDKN2D//IFI6//PSMB9//PINX1
GO:0031646	positive regulation of neurological system process	Biological process	4	44	271	14742	4.94532	0.00851543	0.216028	2.06979	C11ORF9//LGI1//NMU//CRHR1
GO:0009725	response to hormone stimulus	Biological process	22	690	271	14742	1.73445	0.0086569	0.217668	2.06264	FGFR1//SORBS1//BRCA2//CALR//PRDM2//FOS//BCL2//NR3C1//CCL5//VGF//CGA//STAT1//EIF2B4//ANXA3//CALCR//NTRK3//PXN//CRHR1//PRKACB//MSX2//CBLB//RBM14
GO:0001764	neuron migration	Biological process	5	69	271	14742	3.94192	0.00873328	0.217668	2.05882	FGFR1//NTRK2//NTRK3//TWIST1//DYX1C1
GO:0001936	regulation of endothelial cell proliferation	Biological process	5	69	271	14742	3.94192	0.00873328	0.217668	2.05882	CAV2//NF1//STAT1//THBS4//WNT2
GO:0014066	regulation of phosphatidylinositol 3-kinase cascade	Biological process	4	45	271	14742	4.83542	0.00921399	0.225241	2.03555	TWIST1//FGFR1//NTRK2//CCL5
GO:0007569	cell aging	Biological process	5	70	271	14742	3.88561	0.00926746	0.225241	2.03304	CALR//MME//TWIST1//BCL2//BRCA2
GO:0022898	regulation of transmembrane transporter activity	Biological process	5	70	271	14742	3.88561	0.00926746	0.225241	2.03304	GNAI2//OPRD1//FKBP1B//TWIST1//BCL2
GO:0051270	regulation of cellular component movement	Biological process	14	373	271	14742	2.04177	0.00928714	0.225241	2.03212	ANXA3//HYAL1//CCL5//S100A7//BCL2//CXCL16//ALOX15B//NF1//TPM1//RAP2C//PLXNA4//THBS4//ROCK1//TWIST1
GO:0003012	muscle system process	Biological process	11	262	271	14742	2.28391	0.00930135	0.225241	2.03145	GAA//CHRNB1//FKBP1B//PXN//TPM1//SSPN//MYL9//SORBS1//ROCK1//NMU//NR3C1
GO:0050900	leukocyte migration	Biological process	10	229	271	14742	2.37548	0.00995135	0.23962	2.00212	CCL5//S100A7//S100A9//CXCL16//ROCK1//THBS4//CD47//GAS6//ITGAL//SLC16A3
GO:0044265	cellular macromolecule catabolic process	Biological process	21	658	271	14742	1.73612	0.0101107	0.240482	1.99522	SMG7//RNPS1//ISG15//WWP2//NEDD4L//XRN1//OAS2//PSMB9//CUL2//USP20//USP18//USP49//C10ORF46//DYX1C1//ERLIN1//ERLIN2//FBXW11//TRIB2//PPP2CB//TBL1X//TRIM9
GO:0030097	hemopoiesis	Biological process	16	455	271	14742	1.91292	0.0101638	0.240482	1.99295	BCL2//LY6D//RASGRP4//KLF6//BLNK//MFAP2//MPZL2//DHRS2//KLF13//SMAP1//NF1//CCL5//KLF10//HIPK1//LILRB1//BRCA2
GO:0008277	regulation of G-protein coupled receptor protein signaling pathway	Biological process	6	100	271	14742	3.26391	0.0103228	0.240482	1.9862	CCL5//CAV2//RGS3//KLK6//USP20//RASGRP4
GO:0009636	response to toxin	Biological process	6	100	271	14742	3.26391	0.0103228	0.240482	1.9862	BCL2//FOS//CCL5//DHRS2//SLC6A14//TRPM6
GO:0071248	cellular response to metal ion	Biological process	5	72	271	14742	3.77768	0.0104026	0.240482	1.98286	MT1F//FOS//CALR//NR3C1//MT1B
GO:0048485	sympathetic nervous system development	Biological process	3	25	271	14742	6.52782	0.0104778	0.240482	1.97973	FOXD2//NF1//PLXNA4
GO:0019222	regulation of metabolic process	Biological process	105	4717	271	14742	1.21091	0.0104846	0.240482	1.97945	CDKN2D//GFI1//PCNA//CALR//CD36//DNMT3A//CIITA//MSX2//SMARCA4//STAT1//TBL1X//KLF10//TWIST1//BHLHE40//WWP2//MLXIPL//HDAC10//LCOR//GNAI2//PXN//RGS3//NR3C1//FOS//KLF6//CRABP2//FGFR1//FOXD2//NAB1//SFPQ//ZNF132//ZNF200//PRDM2//RASSF7//IRF9//RBM14//ZNF292//CASZ1//ARGLU1//PRDM12//DMRTA1//SP6//TIGD6//ZNF420//HIPK1//IRF2BP2//ZNF324B//CHD2//LITAF//EIF2B4//NF1//PAK2//TRIB2//PSMB9//CASP1//IFI27//CALCR//CRHR1/…
GO:0040012	regulation of locomotion	Biological process	14	379	271	14742	2.00944	0.010583	0.240482	1.97539	ANXA3//HYAL1//CCL5//S100A7//BCL2//CXCL16//ALOX15B//NF1//TPM1//RAP2C//PLXNA4//THBS4//ROCK1//TWIST1
GO:0044419	interspecies interaction between organisms	Biological process	14	379	271	14742	2.00944	0.010583	0.240482	1.97539	EIF2AK2//NTRK3//TAP2//CD36//CCL5//SMARCA4//WWP2//PAK2//PSMB9//STAT1//TBP//CUL2//ISG15//NEDD4L
GO:0019933	cAMP-mediated signaling	Biological process	7	131	271	14742	2.90679	0.0106238	0.240482	1.97372	CRHR1//PRKACB//CALCR//S1PR3//GNAI1//GNAI2//OPRD1
GO:0007193	inhibition of adenylate cyclase activity by G-protein signaling pathway	Biological process	4	47	271	14742	4.62966	0.0107207	0.240482	1.96978	S1PR3//GNAI1//GNAI2//OPRD1
GO:0035821	modification of morphology or physiology of other organism	Biological process	4	47	271	14742	4.62966	0.0107207	0.240482	1.96978	EIF2AK2//NTRK3//CCL5//SMARCA4
GO:0051817	modification of morphology or physiology of other organism involved in symbiotic interaction	Biological process	4	47	271	14742	4.62966	0.0107207	0.240482	1.96978	EIF2AK2//NTRK3//CCL5//SMARCA4
GO:0071222	cellular response to lipopolysaccharide	Biological process	5	73	271	14742	3.72593	0.0110043	0.245248	1.95844	CCL5//STAT1//CD36//GFI1//LILRB1
GO:0051384	response to glucocorticoid stimulus	Biological process	7	132	271	14742	2.88477	0.0110482	0.245248	1.95671	NR3C1//BCL2//FOS//NTRK3//ANXA3//CALCR//CCL5
GO:0006936	muscle contraction	Biological process	10	233	271	14742	2.3347	0.0111469	0.246155	1.95285	GAA//TPM1//MYL9//FKBP1B//ROCK1//NMU//CHRNB1//PXN//SSPN//SORBS1
GO:0002237	response to molecule of bacterial origin	Biological process	9	199	271	14742	2.46023	0.0114406	0.25134	1.94155	CCL5//STAT1//FOS//S100A7//S100A8//S100A9//CD36//GFI1//LILRB1
GO:0045766	positive regulation of angiogenesis	Biological process	5	74	271	14742	3.67558	0.0116294	0.25238	1.93444	ANXA3//HYAL1//CCL5//TWIST1//HIPK1
GO:0030325	adrenal gland development	Biological process	3	26	271	14742	6.27675	0.0116861	0.25238	1.93233	NR3C1//NF1//ARID5B
GO:0045599	negative regulation of fat cell differentiation	Biological process	3	26	271	14742	6.27675	0.0116861	0.25238	1.93233	INSIG1//MSX2//TRIB2
GO:0010558	negative regulation of macromolecule biosynthetic process	Biological process	25	838	271	14742	1.62287	0.0117293	0.25238	1.93073	CALR//CD36//DNMT3A//GFI1//CIITA//MSX2//PCNA//SMARCA4//STAT1//TBL1X//KLF10//TWIST1//BHLHE40//WWP2//MLXIPL//HDAC10//LCOR//RAD17//NAB1//FBXW11//ARID5B//EIF2B4//LILRB1//TRIB2//BRCA2
GO:0010038	response to metal ion	Biological process	10	235	271	14742	2.31483	0.011784	0.25238	1.92871	BCL2//S100A8//S100A9//PCNA//NR3C1//MT1F//FOS//CALR//MT1B//NEDD4L
GO:0048583	regulation of response to stimulus	Biological process	52	2080	271	14742	1.35996	0.0119532	0.254122	1.92252	PXN//RGS3//LILRB1//TAP2//CD36//FOS//CCL5//USP20//RASGRP4//HIPK1//S100A7//TWIST1//FGFR1//NTRK2//CAV2//PAK2//HPSE//NR3C1//FOXD2//MSX2//RRAGD//RRAGC//CRHR1//SMAP1//NF1//SIPA1//CALR//DYX1C1//GFI1//ARHGEF9//ARHGEF18//ITSN2//CASP1//S100A12//LITAF//STAT1//TRIB2//KLK6//PPP2CB//NTRK3//PLXNA4//NT5E//ITGAL//BCL2//CBLB//RASGRP1//USP18//SMARCA4//CASK//GAS6//THBS4//WNT2
GO:0050790	regulation of catalytic activity	Biological process	39	1468	271	14742	1.44519	0.0119846	0.254122	1.92137	CDKN2D//GNAI2//PXN//RGS3//NF1//PAK2//TRIB2//CASP1//IFI27//CALR//CALCR//CRHR1//NTRK2//S1PR3//GNAI1//OPRD1//PRKACB//RASGRP4//FGFR1//CCL5//CAST//SLPI//TFPI//GFI1//TMED2//PCNA//SMAP1//FKBP1B//TPM1//SIPA1//BCL2//CXCL1//IFI6//CAMKK2//LRP8//PSMB9//PINX1//OAS1//RAP2C
GO:0030855	epithelial cell differentiation	Biological process	11	272	271	14742	2.19994	0.012075	0.254771	1.91811	STAT1//CDSN//IRF6//S100A7//ALOX15B//ROCK1//MSX2//CRHR1//UPK2//EZR//RHCG
GO:0019935	cyclic-nucleotide-mediated signaling	Biological process	8	167	271	14742	2.60592	0.0121357	0.254789	1.91594	OPRD1//CRHR1//PRKACB//CALCR//S1PR3//GNAI1//GNAI2//CD36
GO:0051051	negative regulation of transport	Biological process	10	237	271	14742	2.2953	0.0124484	0.260074	1.90489	LILRB1//BCL2//NEDD4L//NF1//WWP2//FBXW11//CD36//GNAI2//OPRD1//TWIST1
GO:0009617	response to bacterium	Biological process	12	311	271	14742	2.09898	0.0126564	0.262009	1.89769	ANXA3//S100A12//CST11//CD36//S100A7//CCL5//STAT1//FOS//S100A8//S100A9//GFI1//LILRB1
GO:0009266	response to temperature stimulus	Biological process	6	105	271	14742	3.10849	0.012926	0.262009	1.88853	BCL2//EIF2B4//DNAJB4//FOS//VGF//MKI67
GO:0022008	neurogenesis	Biological process	29	1021	271	14742	1.54511	0.0129351	0.262009	1.88823	FGFR1//NTRK2//NTRK3//TWIST1//DYX1C1//ARTN//NF1//COL4A5//PAK2//ROCK1//EZR//LGI1//TUBB3//MYL9//PLXNA4//GFI1//C11ORF9//EIF2B4//HDAC10//NAB1//BCL2//WNT2//CDH23//CALR//CCL5//THBS4//FOXD2//SSH2//PRDM12
GO:2000145	regulation of cell motility	Biological process	13	350	271	14742	2.02052	0.0129625	0.262009	1.88731	ANXA3//HYAL1//CCL5//S100A7//BCL2//CXCL16//ALOX15B//NF1//TPM1//RAP2C//THBS4//TWIST1//ROCK1
GO:0014003	oligodendrocyte development	Biological process	3	27	271	14742	6.04428	0.0129713	0.262009	1.88702	C11ORF9//EIF2B4//HDAC10
GO:0022409	positive regulation of cell-cell adhesion	Biological process	3	27	271	14742	6.04428	0.0129713	0.262009	1.88702	CCL5//CD47//ITGAL
GO:2001257	regulation of cation channel activity	Biological process	3	27	271	14742	6.04428	0.0129713	0.262009	1.88702	GNAI2//OPRD1//FKBP1B
GO:0000904	cell morphogenesis involved in differentiation	Biological process	20	634	271	14742	1.71604	0.0134092	0.264837	1.8726	MSX2//STAT1//COL4A5//FGFR1//PAK2//ROCK1//EZR//ARTN//LGI1//TUBB3//MYL9//PLXNA4//TWIST1//BCL2//NTRK3//FOXD2//SSH2//NTRK2//CDH23//WNT2
GO:0045785	positive regulation of cell adhesion	Biological process	6	106	271	14742	3.07916	0.0134972	0.264837	1.86976	CD36//CD47//ITGAL//CCL5//HYAL1//TPM1
GO:0001959	regulation of cytokine-mediated signaling pathway	Biological process	5	77	271	14742	3.53237	0.0136486	0.264837	1.86491	HIPK1//STAT1//USP18//CCL5//GFI1
GO:0071219	cellular response to molecule of bacterial origin	Biological process	5	77	271	14742	3.53237	0.0136486	0.264837	1.86491	CCL5//STAT1//CD36//GFI1//LILRB1
GO:0009629	response to gravity	Biological process	2	10	271	14742	10.8797	0.0137454	0.264837	1.86184	CBLB//FOS
GO:0048712	negative regulation of astrocyte differentiation	Biological process	2	10	271	14742	10.8797	0.0137454	0.264837	1.86184	NF1//NTRK3
GO:0051797	regulation of hair follicle development	Biological process	2	10	271	14742	10.8797	0.0137454	0.264837	1.86184	MSX2//HPSE
GO:0051882	mitochondrial depolarization	Biological process	2	10	271	14742	10.8797	0.0137454	0.264837	1.86184	BCL2//IFI6
GO:0051927	negative regulation of calcium ion transport via voltage-gated calcium channel activity	Biological process	2	10	271	14742	10.8797	0.0137454	0.264837	1.86184	GNAI2//OPRD1
GO:2000404	regulation of T cell migration	Biological process	2	10	271	14742	10.8797	0.0137454	0.264837	1.86184	S100A7//CCL5
GO:0016049	cell growth	Biological process	13	353	271	14742	2.00335	0.01383	0.264837	1.85918	WISP2//BCL2//HYAL1//LGI1//CXCL16//CDKN2D//SIPA1//SMARCA4//NTRK3//PLXNA4//FOXD2//RRAGC//RASGRP4
GO:0006694	steroid biosynthetic process	Biological process	7	138	271	14742	2.75935	0.013857	0.264837	1.85833	IDI1//INSIG1//LSS//MVK//SQLE//GFI1//NR3C1
GO:0043161	proteasomal ubiquitin-dependent protein catabolic process	Biological process	9	206	271	14742	2.37663	0.0140848	0.2663	1.85125	ERLIN1//ERLIN2//PSMB9//FBXW11//TRIB2//PPP2CB//TBL1X//WWP2//TRIM9
GO:0030316	osteoclast differentiation	Biological process	4	51	271	14742	4.26655	0.0141907	0.2663	1.848	NF1//CCL5//KLF10//LILRB1
GO:0030004	cellular monovalent inorganic cation homeostasis	Biological process	3	28	271	14742	5.82841	0.0143341	0.2663	1.84363	NEDD4L//BCL2//AQP11
GO:0033261	regulation of S phase	Biological process	3	28	271	14742	5.82841	0.0143341	0.2663	1.84363	BRCA2//SMARCA4//HYAL1
GO:0035115	embryonic forelimb morphogenesis	Biological process	3	28	271	14742	5.82841	0.0143341	0.2663	1.84363	CRABP2//MSX2//TWIST1
GO:0045069	regulation of viral genome replication	Biological process	3	28	271	14742	5.82841	0.0143341	0.2663	1.84363	CCL5//OAS1//SLPI
GO:0019228	regulation of action potential in neuron	Biological process	5	78	271	14742	3.48708	0.014371	0.2663	1.84251	C11ORF9//NF1//NAB1//KLK6//EIF2B4
GO:0030522	intracellular receptor mediated signaling pathway	Biological process	9	207	271	14742	2.36515	0.0144966	0.267466	1.83873	RBM14//CALR//DYX1C1//TWIST1//BCL2//CASP1//SUGT1//NR3C1//SMARCA4
GO:0044271	cellular nitrogen compound biosynthetic process	Biological process	17	515	271	14742	1.79568	0.0146229	0.268633	1.83497	GART//NT5E//OAS1//OAS2//NME5//GUCY1A3//PHGDH//CALCR//CRHR1//NTRK2//S1PR3//GNAI1//GNAI2//OPRD1//KYNU//TPH1//NF1
GO:0002520	immune system development	Biological process	17	516	271	14742	1.7922	0.0148776	0.272138	1.82747	BCL2//CBLB//BRCA2//LY6D//RASGRP4//KLF6//BLNK//MFAP2//MPZL2//DHRS2//KLF13//SMAP1//NF1//CCL5//KLF10//HIPK1//LILRB1
GO:0016525	negative regulation of angiogenesis	Biological process	4	52	271	14742	4.1845	0.0151568	0.276061	1.81939	NF1//ROCK1//STAT1//THBS4
GO:0031960	response to corticosteroid stimulus	Biological process	7	141	271	14742	2.70064	0.0154383	0.279991	1.8114	NR3C1//ANXA3//CALCR//CCL5//BCL2//FOS//NTRK3
GO:0051969	regulation of transmission of nerve impulse	Biological process	8	175	271	14742	2.48679	0.0157137	0.283682	1.80372	NF1//C11ORF9//VGF//BHLHE40//GNAI2//LGI1//NMU//CRHR1
GO:0072676	lymphocyte migration	Biological process	3	29	271	14742	5.62743	0.0157749	0.283682	1.80203	S100A7//CCL5//CXCL16
GO:0001935	endothelial cell proliferation	Biological process	5	80	271	14742	3.39991	0.0158917	0.284581	1.79883	CAV2//NF1//STAT1//THBS4//WNT2
GO:0007187	G-protein signaling, coupled to cyclic nucleotide second messenger	Biological process	7	142	271	14742	2.68162	0.0159928	0.285193	1.79608	CRHR1//PRKACB//CALCR//S1PR3//GNAI1//GNAI2//OPRD1
GO:0007044	cell-substrate junction assembly	Biological process	4	53	271	14742	4.10555	0.0161634	0.287035	1.79147	BCL2//PXN//SORBS1//ROCK1
GO:0048878	chemical homeostasis	Biological process	22	732	271	14742	1.63493	0.0162732	0.287786	1.78853	CALR//RHCG//CCL5//ABCG2//NEDD4L//CALCR//CRHR1//S1PR3//MLXIPL//BCL2//FKBP1B//TAP2//C11ORF9//NF1//CHRNB1//NAB1//KLK6//EIF2B4//VGF//AQP11//CDH23//IFI6
GO:0010818	T cell chemotaxis	Biological process	2	11	271	14742	9.89064	0.016598	0.288737	1.77995	S100A7//CCL5
GO:0042634	regulation of hair cycle	Biological process	2	11	271	14742	9.89064	0.016598	0.288737	1.77995	MSX2//HPSE
GO:0071622	regulation of granulocyte chemotaxis	Biological process	2	11	271	14742	9.89064	0.016598	0.288737	1.77995	CCL5//S100A7
GO:0090136	epithelial cell-cell adhesion	Biological process	2	11	271	14742	9.89064	0.016598	0.288737	1.77995	THBS4//KIFC3
GO:0032844	regulation of homeostatic process	Biological process	9	213	271	14742	2.29853	0.0171566	0.296604	1.76557	BCL2//FKBP1B//CCL5//C11ORF9//NF1//KLF13//SMAP1//IFI6//MLXIPL
GO:0045786	negative regulation of cell cycle	Biological process	15	443	271	14742	1.84194	0.0172246	0.296604	1.76385	PSMB9//RAD17//CALR//CDKN2D//IRF6//CUL2//RPRM//SESN3//INTS3//SMARCA4//BCL2//MLXIPL//ALOX15B//SIPA1//LILRB1
GO:0042992	negative regulation of transcription factor import into nucleus	Biological process	3	30	271	14742	5.43985	0.0172943	0.296604	1.7621	FBXW11//CD36//NF1
GO:0071495	cellular response to endogenous stimulus	Biological process	17	525	271	14742	1.76148	0.0173286	0.296604	1.76124	FGFR1//SORBS1//PPP2CB//PRKACB//DNMT3A//RRAGD//RRAGC//CGA//FOS//NR3C1//CCL5//CD36//PXN//STAT1//CRHR1//MSX2//WNT2
GO:0048534	hemopoietic or lymphoid organ development	Biological process	16	486	271	14742	1.7909	0.0179644	0.306258	1.74559	BCL2//BRCA2//LY6D//RASGRP4//KLF6//BLNK//MFAP2//MPZL2//DHRS2//KLF13//SMAP1//NF1//CCL5//KLF10//HIPK1//LILRB1
GO:0048644	muscle organ morphogenesis	Biological process	4	55	271	14742	3.95626	0.0183001	0.306997	1.73755	WNT2//GAA//TPM1//ARID5B
GO:0007155	cell adhesion	Biological process	26	916	271	14742	1.54406	0.0183276	0.306997	1.7369	ITGAL//BCL2//NF1//CASK//CD36//CDH15//PCDH7//MPZL2//CDH26//CDH23//ROCK1//CCL5//EZR//SORBS1//HPSE//SIPA1//CDSN//CD47//HYAL1//TPM1//PXN//THBS4//KIFC3//SSPN//LY6D//WISP2
GO:0022610	biological adhesion	Biological process	26	916	271	14742	1.54406	0.0183276	0.306997	1.7369	ITGAL//BCL2//NF1//CASK//CD36//CD47//CDH15//CDSN//PCDH7//PXN//THBS4//SSPN//LY6D//WISP2//HPSE//CDH26//CDH23//MPZL2//ROCK1//CCL5//EZR//SORBS1//SIPA1//HYAL1//TPM1//KIFC3
GO:0060759	regulation of response to cytokine stimulus	Biological process	5	83	271	14742	3.27702	0.018368	0.306997	1.73594	HIPK1//STAT1//USP18//CCL5//GFI1
GO:0071241	cellular response to inorganic substance	Biological process	5	83	271	14742	3.27702	0.018368	0.306997	1.73594	MT1F//FOS//CALR//NR3C1//MT1B
GO:0014812	muscle cell migration	Biological process	3	31	271	14742	5.26437	0.0188925	0.314133	1.72371	BCL2//CCL5//THBS4
GO:0043523	regulation of neuron apoptosis	Biological process	7	147	271	14742	2.59041	0.0189785	0.314133	1.72174	BCL2//NTRK2//ROCK1//NR3C1//NF1//CRHR1//CCL5
GO:0006508	proteolysis	Biological process	26	919	271	14742	1.53902	0.019016	0.314133	1.72088	ISG15//WWP2//NEDD4L//PSMB9//CUL2//USP20//USP18//USP49//C10ORF46//DYX1C1//ERLIN1//ERLIN2//FBXW11//TRIB2//PPP2CB//TBL1X//TRIM9//CASP1//GAS6//MME//KLK6//ST14//TMPRSS2//TPSAB1//LRP8//MMEL1
GO:0030307	positive regulation of cell growth	Biological process	5	84	271	14742	3.23801	0.0192468	0.3153	1.71564	NTRK3//BCL2//HYAL1//LGI1//CXCL16
GO:0001525	angiogenesis	Biological process	12	330	271	14742	1.97813	0.0192848	0.3153	1.71478	NF1//ROCK1//STAT1//THBS4//ANXA3//HYAL1//CCL5//TWIST1//HIPK1//HPSE//S100A7//SLC12A6
GO:0007194	negative regulation of adenylate cyclase activity	Biological process	4	56	271	14742	3.88561	0.0194311	0.3153	1.7115	S1PR3//GNAI1//GNAI2//OPRD1
GO:0031280	negative regulation of cyclase activity	Biological process	4	56	271	14742	3.88561	0.0194311	0.3153	1.7115	S1PR3//GNAI1//GNAI2//OPRD1
GO:0032008	positive regulation of TOR signaling cascade	Biological process	2	12	271	14742	9.06642	0.0196785	0.3153	1.70601	RRAGD//RRAGC
GO:0032486	Rap protein signal transduction	Biological process	2	12	271	14742	9.06642	0.0196785	0.3153	1.70601	RAP2C
GO:0055094	response to lipoprotein stimulus	Biological process	2	12	271	14742	9.06642	0.0196785	0.3153	1.70601	CD36//CCL5
GO:0071621	granulocyte chemotaxis	Biological process	2	12	271	14742	9.06642	0.0196785	0.3153	1.70601	CCL5//S100A7
GO:0001775	cell activation	Biological process	21	703	271	14742	1.62499	0.0198347	0.316612	1.70257	ITGAL//LILRB1//BCL2//LY6D//DAGLA//CD36//GAS6//GNAI1//GNAI2//RASGRP1//KLF6//BLNK//PAK2//MPZL2//FKBP1B//CCL5//CBLB//DHRS2//CRHR1//ANXA3//CD47
GO:0030099	myeloid cell differentiation	Biological process	9	219	271	14742	2.23556	0.0201571	0.320558	1.69557	MFAP2//DHRS2//KLF13//SMAP1//NF1//CCL5//KLF10//LILRB1//RASGRP4
GO:0022406	membrane docking	Biological process	3	32	271	14742	5.09986	0.0205699	0.324043	1.68677	ROCK1//EZR//CAV2
GO:0051350	negative regulation of lyase activity	Biological process	4	57	271	14742	3.81744	0.0206043	0.324043	1.68604	S1PR3//GNAI1//GNAI2//OPRD1
GO:0060349	bone morphogenesis	Biological process	4	57	271	14742	3.81744	0.0206043	0.324043	1.68604	NAB1//MSX2//INSIG1//TWIST1
GO:0010810	regulation of cell-substrate adhesion	Biological process	5	87	271	14742	3.12635	0.0220475	0.3442	1.65664	BCL2//NF1//CASK//CD36//ROCK1
GO:0034612	response to tumor necrosis factor	Biological process	5	87	271	14742	3.12635	0.0220475	0.3442	1.65664	HIPK1//STAT1//HYAL1//CCL5//CXCL16
GO:0007596	blood coagulation	Biological process	16	500	271	14742	1.74075	0.0227259	0.348807	1.64348	TFPI//DAGLA//CD36//GAS6//GNAI1//GNAI2//RASGRP1//HPSE//CD47//CD59//GUCY1A3//ITGAL//PRKACB//LRP8//SLC16A3//HPS5
GO:0003254	regulation of membrane depolarization	Biological process	2	13	271	14742	8.369	0.0229777	0.348807	1.63869	BCL2//IFI6
GO:2000403	positive regulation of lymphocyte migration	Biological process	2	13	271	14742	8.369	0.0229777	0.348807	1.63869	S100A7//CCL5
GO:2001258	negative regulation of cation channel activity	Biological process	2	13	271	14742	8.369	0.0229777	0.348807	1.63869	GNAI2//OPRD1
GO:0051224	negative regulation of protein transport	Biological process	5	88	271	14742	3.09083	0.0230368	0.348807	1.63758	LILRB1//FBXW11//CD36//NF1//WWP2
GO:0071216	cellular response to biotic stimulus	Biological process	5	88	271	14742	3.09083	0.0230368	0.348807	1.63758	CCL5//STAT1//CD36//GFI1//LILRB1
GO:0060191	regulation of lipase activity	Biological process	7	153	271	14742	2.48882	0.0230527	0.348807	1.63728	CRHR1//OPRD1//PRKACB//RASGRP4//FGFR1//CCL5//FKBP1B
GO:0043269	regulation of ion transport	Biological process	8	188	271	14742	2.31483	0.023069	0.348807	1.63697	BCL2//NEDD4L//FKBP1B//LILRB1//GNAI2//OPRD1//CCL5//TWIST1
GO:0007009	plasma membrane organization	Biological process	4	59	271	14742	3.68804	0.0230792	0.348807	1.63678	S100A9//CALCR//TMED2//SORBS1
GO:0010951	negative regulation of endopeptidase activity	Biological process	6	120	271	14742	2.71993	0.0234304	0.352864	1.63022	CDKN2D//IFI6//PAK2//CAST//SLPI//TFPI
GO:0048545	response to steroid hormone stimulus	Biological process	11	301	271	14742	1.98799	0.0237119	0.354897	1.62503	BRCA2//CALR//PRDM2//FOS//NR3C1//BCL2//CCL5//ANXA3//CALCR//NTRK3//MSX2
GO:0006140	regulation of nucleotide metabolic process	Biological process	13	380	271	14742	1.861	0.023782	0.354897	1.62375	CALCR//CRHR1//NTRK2//S1PR3//GNAI1//GNAI2//OPRD1//TMED2//SMAP1//NF1//TPM1//SIPA1//RGS3
GO:0008585	female gonad development	Biological process	5	89	271	14742	3.0561	0.0240544	0.354897	1.61881	BCL2//VGF//EIF2B4//BRCA2//ARID5B
GO:0035136	forelimb morphogenesis	Biological process	3	34	271	14742	4.79987	0.0241622	0.354897	1.61686	CRABP2//MSX2//TWIST1
GO:0090398	cellular senescence	Biological process	3	34	271	14742	4.79987	0.0241622	0.354897	1.61686	MME//TWIST1//CALR
GO:0007599	hemostasis	Biological process	16	504	271	14742	1.72694	0.0242479	0.354897	1.61533	DAGLA//CD36//CD47//CD59//GAS6//GNAI1//GNAI2//GUCY1A3//ITGAL//PRKACB//TFPI//LRP8//SLC16A3//RASGRP1//HPS5//HPSE
GO:0050817	coagulation	Biological process	16	504	271	14742	1.72694	0.0242479	0.354897	1.61533	DAGLA//CD36//CD47//CD59//GAS6//GNAI1//GNAI2//GUCY1A3//ITGAL//PRKACB//TFPI//LRP8//SLC16A3//RASGRP1//HPS5//HPSE
GO:0030815	negative regulation of cAMP metabolic process	Biological process	4	60	271	14742	3.62657	0.0243814	0.354897	1.61294	S1PR3//GNAI1//GNAI2//OPRD1
GO:0030818	negative regulation of cAMP biosynthetic process	Biological process	4	60	271	14742	3.62657	0.0243814	0.354897	1.61294	S1PR3//GNAI1//GNAI2//OPRD1
GO:0048584	positive regulation of response to stimulus	Biological process	27	985	271	14742	1.49113	0.0243981	0.354897	1.61264	TAP2//CD36//FOS//CCL5//S100A7//FGFR1//NTRK2//CAV2//PAK2//FOXD2//MSX2//RRAGD//RRAGC//GFI1//CASP1//S100A12//LITAF//KLK6//RASGRP4//NTRK3//ITGAL//BCL2//CBLB//HPSE//GAS6//THBS4//WNT2
GO:0072521	purine-containing compound metabolic process	Biological process	22	763	271	14742	1.5685	0.0247247	0.356107	1.60687	GART//NT5E//OAS1//OAS2//GUCY1A3//NME5//GNAI1//GNAI2//RRAGC//RNF213//CALCR//CRHR1//NTRK2//S1PR3//OPRD1//TMED2//SMAP1//NF1//TPM1//SIPA1//RGS3//DNMT3A
GO:0007399	nervous system development	Biological process	40	1590	271	14742	1.36852	0.0247604	0.356107	1.60624	FGFR1//NTRK2//NTRK3//TWIST1//DYX1C1//TMED2//ARTN//NF1//COL4A5//PAK2//ROCK1//EZR//LGI1//TUBB3//MYL9//PLXNA4//KLK6//BCL2//BRCA2//NR3C1//PHGDH//FOXD2//GFI1//C11ORF9//EIF2B4//HDAC10//NAB1//ANXA3//LRP8//PRDM12//WNT2//CDH23//CALR//CCL5//THBS4//SSH2//FOS//CXCL1//SMARCA4//ZIC5
GO:0009987	cellular process	Biological process	243	12597	271	14742	1.04936	0.0249168	0.356107	1.60351	GAA//OPRD1//PCNA//RAD17//RBMS1//RBM14//CHTF8//BRCA2//PSMB9//CDKN2D//BCL2//CUL2//GFI1//CALR//CD36//DNMT3A//CIITA//MSX2//SMARCA4//STAT1//TBL1X//KLF10//TWIST1//BHLHE40//WWP2//MLXIPL//HDAC10//LCOR//FGFR1//NF1//CCL5//CAMKK2//SMG7//RNPS1//GNAI2//PXN//RGS3//FBXW11//ISG15//NEDD4L//XRN1//SFPQ//SNRPB2//FKBP1B//ROCK1//PTGES//HPSE//RRAGC//RASGRP4//WISP2//CCM2//ITGAL//FOXD2//NTRK2//NTRK3//DYX1C1//IFI6//CAV2//…
GO:0031589	cell-substrate adhesion	Biological process	8	191	271	14742	2.27847	0.0250617	0.356107	1.60099	BCL2//NF1//CASK//CD36//SORBS1//HPSE//PXN//ROCK1
GO:0030879	mammary gland development	Biological process	6	122	271	14742	2.67534	0.0251649	0.356107	1.59921	BRCA2//MSX2//NR3C1//IRF6//TPH1//WNT2
GO:0048015	phosphatidylinositol-mediated signaling	Biological process	6	122	271	14742	2.67534	0.0251649	0.356107	1.59921	NF1//TWIST1//FGFR1//NTRK2//CCL5//PCNA
GO:0048017	inositol lipid-mediated signaling	Biological process	6	122	271	14742	2.67534	0.0251649	0.356107	1.59921	NF1//TWIST1//FGFR1//NTRK2//CCL5//PCNA
GO:0008284	positive regulation of cell proliferation	Biological process	18	591	271	14742	1.65681	0.0252147	0.356107	1.59835	NF1//THBS4//WNT2//STAT1//BCL2//HPSE//ITGAL//CCL5//GAS6//HYAL1//CALR//CD47//S1PR3//FGFR1//GNAI2//NTRK2//MLXIPL//SP6
GO:0006066	alcohol metabolic process	Biological process	17	549	271	14742	1.68447	0.0254025	0.356107	1.59512	FPGT//GAA//PGM1//PRKACB//PPIP5K1//NR3C1//CGA//IDI1//INSIG1//LSS//MVK//SQLE//AKR1B10//C1QTNF3//SORBS1//MLXIPL//CCL5
GO:2000113	negative regulation of cellular macromolecule biosynthetic process	Biological process	23	810	271	14742	1.54465	0.0256301	0.356107	1.59125	CALR//CD36//DNMT3A//GFI1//CIITA//MSX2//PCNA//SMARCA4//STAT1//TBL1X//KLF10//TWIST1//BHLHE40//WWP2//MLXIPL//HDAC10//LCOR//RAD17//NAB1//FBXW11//ARID5B//EIF2B4//BRCA2
GO:0030800	negative regulation of cyclic nucleotide metabolic process	Biological process	4	61	271	14742	3.56712	0.0257273	0.356107	1.58961	S1PR3//GNAI1//GNAI2//OPRD1
GO:0030803	negative regulation of cyclic nucleotide biosynthetic process	Biological process	4	61	271	14742	3.56712	0.0257273	0.356107	1.58961	S1PR3//GNAI1//GNAI2//OPRD1
GO:0030856	regulation of epithelial cell differentiation	Biological process	4	61	271	14742	3.56712	0.0257273	0.356107	1.58961	STAT1//ROCK1//MSX2//ALOX15B
GO:0010466	negative regulation of peptidase activity	Biological process	6	123	271	14742	2.65359	0.0260634	0.356107	1.58397	CAST//SLPI//TFPI//CDKN2D//IFI6//PAK2
GO:0010518	positive regulation of phospholipase activity	Biological process	6	123	271	14742	2.65359	0.0260634	0.356107	1.58397	CRHR1//OPRD1//PRKACB//RASGRP4//FGFR1//CCL5
GO:0048762	mesenchymal cell differentiation	Biological process	6	123	271	14742	2.65359	0.0260634	0.356107	1.58397	FOXD2//MSX2//TWIST1//BCL2//WNT2//STAT1
GO:0071230	cellular response to amino acid stimulus	Biological process	3	35	271	14742	4.66273	0.0260773	0.356107	1.58374	DNMT3A//RRAGD//RRAGC
GO:0046890	regulation of lipid biosynthetic process	Biological process	5	91	271	14742	2.98893	0.0261754	0.356107	1.58211	INSIG1//GFI1//SORBS1//MLXIPL//NR3C1
GO:0045595	regulation of cell differentiation	Biological process	24	857	271	14742	1.52341	0.0264228	0.356107	1.57802	STAT1//NF1//TWIST1//CD36//NTRK2//GFI1//BCL2//ALOX15B//KLF10//INSIG1//MSX2//TRIB2//ROCK1//KLF13//SMAP1//CALR//FGFR1//CCL5//NTRK3//PLXNA4//SSH2//CDH15//LILRB1//KLK6
GO:0042391	regulation of membrane potential	Biological process	8	193	271	14742	2.25486	0.0264552	0.356107	1.57749	C11ORF9//NF1//NAB1//KLK6//EIF2B4//BCL2//IFI6//CHRNB1
GO:0014911	positive regulation of smooth muscle cell migration	Biological process	2	14	271	14742	7.77122	0.0264866	0.356107	1.57697	BCL2//CCL5
GO:0045672	positive regulation of osteoclast differentiation	Biological process	2	14	271	14742	7.77122	0.0264866	0.356107	1.57697	CCL5//KLF10
GO:0045745	positive regulation of G-protein coupled receptor protein signaling pathway	Biological process	2	14	271	14742	7.77122	0.0264866	0.356107	1.57697	CAV2//KLK6
GO:0060317	cardiac epithelial to mesenchymal transition	Biological process	2	14	271	14742	7.77122	0.0264866	0.356107	1.57697	MSX2//WNT2
GO:0006163	purine nucleotide metabolic process	Biological process	21	725	271	14742	1.57568	0.0266952	0.357783	1.57357	GART//NT5E//OAS1//OAS2//GUCY1A3//NME5//GNAI1//GNAI2//RRAGC//RNF213//CALCR//CRHR1//NTRK2//S1PR3//OPRD1//TMED2//SMAP1//NF1//TPM1//SIPA1//RGS3
GO:0030809	negative regulation of nucleotide biosynthetic process	Biological process	4	62	271	14742	3.50958	0.027117	0.361165	1.56676	S1PR3//GNAI1//GNAI2//OPRD1
GO:0051701	interaction with host	Biological process	4	62	271	14742	3.50958	0.027117	0.361165	1.56676	EIF2AK2//NTRK3//TAP2//WWP2
GO:0018108	peptidyl-tyrosine phosphorylation	Biological process	7	159	271	14742	2.3949	0.0276944	0.367706	1.55761	CCL5//CD36//PAK2//THBS4//TNK2//FGFR1//PXN
GO:0060048	cardiac muscle contraction	Biological process	3	36	271	14742	4.53321	0.0280713	0.371553	1.55174	FKBP1B//GAA//TPM1
GO:0034614	cellular response to reactive oxygen species	Biological process	4	63	271	14742	3.45387	0.0285509	0.375567	1.54438	CD36//FOS//PXN//TPM1
GO:0045762	positive regulation of adenylate cyclase activity	Biological process	4	63	271	14742	3.45387	0.0285509	0.375567	1.54438	CALCR//CRHR1//NTRK2//NF1
GO:0007568	aging	Biological process	8	196	271	14742	2.22035	0.0286454	0.375652	1.54294	BCL2//BRCA2//CALR//MME//TWIST1//FOS//NR3C1//CCL5
GO:0010959	regulation of metal ion transport	Biological process	7	161	271	14742	2.36515	0.0293731	0.376822	1.53205	BCL2//NEDD4L//FKBP1B//LILRB1//GNAI2//OPRD1//CCL5
GO:0018212	peptidyl-tyrosine modification	Biological process	7	161	271	14742	2.36515	0.0293731	0.376822	1.53205	CCL5//FGFR1//PXN//CD36//PAK2//THBS4//TNK2
GO:0050804	regulation of synaptic transmission	Biological process	7	161	271	14742	2.36515	0.0293731	0.376822	1.53205	NF1//VGF//BHLHE40//GNAI2//LGI1//NMU//CRHR1
GO:0034762	regulation of transmembrane transport	Biological process	8	197	271	14742	2.20908	0.0294025	0.376822	1.53162	BCL2//FBXW11//CD36//NF1//GNAI2//OPRD1//FKBP1B//TWIST1
GO:0030216	keratinocyte differentiation	Biological process	5	94	271	14742	2.89354	0.0295751	0.376822	1.52907	ROCK1//MSX2//CDSN//IRF6//S100A7
GO:0045471	response to ethanol	Biological process	5	94	271	14742	2.89354	0.0295751	0.376822	1.52907	CCL5//BCL2//NTRK3//S100A8//S100A9
GO:0072358	cardiovascular system development	Biological process	20	689	271	14742	1.57906	0.0295762	0.376822	1.52906	S100A7//SLC12A6//CCM2//TMED2//GAA//MSX2//TWIST1//NF1//PCNA//ROCK1//STAT1//THBS4//ANXA3//HYAL1//CCL5//HIPK1//CALR//WNT2//TPM1//HPSE
GO:0072359	circulatory system development	Biological process	20	689	271	14742	1.57906	0.0295762	0.376822	1.52906	S100A7//SLC12A6//CCM2//TMED2//GAA//MSX2//TWIST1//NF1//PCNA//ROCK1//STAT1//THBS4//ANXA3//HYAL1//CCL5//HIPK1//CALR//WNT2//TPM1//HPSE
GO:0031281	positive regulation of cyclase activity	Biological process	4	64	271	14742	3.39991	0.030029	0.376822	1.52246	CALCR//CRHR1//NTRK2//NF1
GO:0045980	negative regulation of nucleotide metabolic process	Biological process	4	64	271	14742	3.39991	0.030029	0.376822	1.52246	S1PR3//GNAI1//GNAI2//OPRD1
GO:0001914	regulation of T cell mediated cytotoxicity	Biological process	2	15	271	14742	7.25314	0.0301964	0.376822	1.52004	LILRB1//TAP2
GO:0007263	nitric oxide mediated signal transduction	Biological process	2	15	271	14742	7.25314	0.0301964	0.376822	1.52004	CD36//GUCY1A3
GO:0030857	negative regulation of epithelial cell differentiation	Biological process	2	15	271	14742	7.25314	0.0301964	0.376822	1.52004	MSX2//STAT1
GO:0046636	negative regulation of alpha-beta T cell activation	Biological process	2	15	271	14742	7.25314	0.0301964	0.376822	1.52004	CBLB//LILRB1
GO:0072678	T cell migration	Biological process	2	15	271	14742	7.25314	0.0301964	0.376822	1.52004	S100A7//CCL5
GO:2000677	regulation of transcription regulatory region DNA binding	Biological process	2	15	271	14742	7.25314	0.0301964	0.376822	1.52004	MSX2//TWIST1
GO:0051402	neuron apoptosis	Biological process	7	162	271	14742	2.35055	0.0302377	0.376822	1.51945	BCL2//NTRK2//ROCK1//NR3C1//NF1//CRHR1//CCL5
GO:0044057	regulation of system process	Biological process	13	394	271	14742	1.79488	0.0306704	0.379728	1.51328	GAA//TPM1//MYL9//NMU//FKBP1B//NF1//C11ORF9//VGF//BHLHE40//GNAI2//LGI1//OPRD1//CRHR1
GO:0048514	blood vessel morphogenesis	Biological process	13	394	271	14742	1.79488	0.0306704	0.379728	1.51328	S100A7//SLC12A6//CCM2//NF1//ROCK1//STAT1//THBS4//ANXA3//HYAL1//CCL5//TWIST1//HIPK1//HPSE
GO:0050731	positive regulation of peptidyl-tyrosine phosphorylation	Biological process	5	95	271	14742	2.86308	0.0307673	0.379728	1.51191	CCL5//CD36//PAK2//THBS4//TNK2
GO:2000147	positive regulation of cell motility	Biological process	8	199	271	14742	2.18688	0.030958	0.379728	1.50923	ANXA3//HYAL1//CCL5//S100A7//BCL2//CXCL16//THBS4//TWIST1
GO:0003008	system process	Biological process	39	1568	271	14742	1.35302	0.0310035	0.379728	1.50859	FOS//NMU//GAA//BCL2//TPM1//CHRNB1//FKBP1B//PXN//SSPN//MYL9//SORBS1//ROCK1//CAV2//GNAI1//GNAI2//PRKACB//ARHGEF9//NEDD4L//GJA8//KIFC3//TBL1X//CDH23//NTRK2//CRHR1//GUCY1A3//STAT1//NF1//NR3C1//PCLO//MME//C11ORF9//CGA//NAB1//KLK6//EIF2B4//VGF//BHLHE40//LGI1//OPRD1
GO:0006954	inflammatory response	Biological process	14	436	271	14742	1.74674	0.0310946	0.379728	1.50732	S100A8//MGST3//S100A9//CCL5//NT5E//S1PR3//FOS//CXCL1//HYAL1//IL1RAP//ITGAL//S100A12//CCL22//BLNK
GO:0051093	negative regulation of developmental process	Biological process	14	436	271	14742	1.74674	0.0310946	0.379728	1.50732	STAT1//NF1//ROCK1//THBS4//KLF10//INSIG1//MSX2//TRIB2//KLF13//CALR//TWIST1//BCL2//NTRK3//LILRB1
GO:0007422	peripheral nervous system development	Biological process	4	65	271	14742	3.3476	0.0315516	0.383114	1.50098	NAB1//NF1//PLXNA4//FOXD2
GO:0055067	monovalent inorganic cation homeostasis	Biological process	4	65	271	14742	3.3476	0.0315516	0.383114	1.50098	NEDD4L//RHCG//BCL2//AQP11
GO:0001558	regulation of cell growth	Biological process	10	276	271	14742	1.97096	0.0318047	0.383409	1.49751	BCL2//HYAL1//LGI1//CXCL16//CDKN2D//SIPA1//SMARCA4//NTRK3//PLXNA4//WISP2
GO:0010517	regulation of phospholipase activity	Biological process	6	129	271	14742	2.53016	0.0319033	0.383409	1.49616	CRHR1//OPRD1//PRKACB//RASGRP4//FGFR1//CCL5
GO:0051090	regulation of sequence-specific DNA binding transcription factor activity	Biological process	11	316	271	14742	1.89362	0.0322354	0.383409	1.49167	GFI1//MSX2//TWIST1//BHLHE40//WWP2//ANXA3//SMARCA4//WNT2//ARID5B//FOXD2//FOS
GO:0014068	positive regulation of phosphatidylinositol 3-kinase cascade	Biological process	3	38	271	14742	4.29462	0.0322956	0.383409	1.49086	FGFR1//NTRK2//CCL5
GO:0033143	regulation of intracellular steroid hormone receptor signaling pathway	Biological process	3	38	271	14742	4.29462	0.0322956	0.383409	1.49086	CALR//DYX1C1//SMARCA4
GO:0045670	regulation of osteoclast differentiation	Biological process	3	38	271	14742	4.29462	0.0322956	0.383409	1.49086	NF1//CCL5//KLF10
GO:0045930	negative regulation of mitotic cell cycle	Biological process	3	38	271	14742	4.29462	0.0322956	0.383409	1.49086	RAD17//SMARCA4//BCL2
GO:0050806	positive regulation of synaptic transmission	Biological process	3	38	271	14742	4.29462	0.0322956	0.383409	1.49086	CRHR1//LGI1//NMU
GO:0046483	heterocycle metabolic process	Biological process	27	1011	271	14742	1.45278	0.0324574	0.384259	1.48869	GART//NT5E//OAS1//OAS2//GUCY1A3//NME5//GNAI1//GNAI2//RRAGC//RNF213//KYNU//CALCR//CRHR1//NTRK2//S1PR3//OPRD1//TMED2//CCL5//SMAP1//NF1//TPM1//SIPA1//TPH1//RGS3//ABCG2//MME//DNMT3A
GO:0051349	positive regulation of lyase activity	Biological process	4	66	271	14742	3.29688	0.0331189	0.391005	1.47992	CALCR//CRHR1//NTRK2//NF1
GO:0070997	neuron death	Biological process	7	166	271	14742	2.29391	0.0338673	0.396621	1.47022	BCL2//NTRK2//ROCK1//NR3C1//NF1//CRHR1//CCL5
GO:0060193	positive regulation of lipase activity	Biological process	6	131	271	14742	2.49154	0.0340247	0.396621	1.46821	CRHR1//OPRD1//PRKACB//RASGRP4//FGFR1//CCL5
GO:0001953	negative regulation of cell-matrix adhesion	Biological process	2	16	271	14742	6.79982	0.0340986	0.396621	1.46726	NF1//CASK
GO:0010894	negative regulation of steroid biosynthetic process	Biological process	2	16	271	14742	6.79982	0.0340986	0.396621	1.46726	GFI1//INSIG1
GO:0032413	negative regulation of ion transmembrane transporter activity	Biological process	2	16	271	14742	6.79982	0.0340986	0.396621	1.46726	GNAI2//OPRD1
GO:0030518	intracellular steroid hormone receptor signaling pathway	Biological process	5	98	271	14742	2.77543	0.0345233	0.396621	1.46189	RBM14//CALR//DYX1C1//NR3C1//SMARCA4
GO:0010043	response to zinc ion	Biological process	3	39	271	14742	4.1845	0.0345252	0.396621	1.46186	MT1B//S100A8//S100A9
GO:0019048	virus-host interaction	Biological process	3	39	271	14742	4.1845	0.0345252	0.396621	1.46186	EIF2AK2//NTRK3//TAP2
GO:0048168	regulation of neuronal synaptic plasticity	Biological process	3	39	271	14742	4.1845	0.0345252	0.396621	1.46186	NF1//VGF//BHLHE40
GO:0072659	protein localization in plasma membrane	Biological process	3	39	271	14742	4.1845	0.0345252	0.396621	1.46186	TMED2//SORBS1//CALCR
GO:0071356	cellular response to tumor necrosis factor	Biological process	4	67	271	14742	3.24767	0.0347309	0.397912	1.45928	HIPK1//STAT1//HYAL1//CCL5
GO:0016044	cellular membrane organization	Biological process	18	615	271	14742	1.59215	0.0353427	0.403835	1.4517	CHRNB1//CAV2//LRP8//TNK2//USP20//ITSN2//CXCL16//ANXA3//CD36//CALCR//LILRB1//S100A9//NEDD4L//BCL2//TMED2//CALR//SORBS1//UPK2
GO:0051253	negative regulation of RNA metabolic process	Biological process	21	748	271	14742	1.52723	0.0356692	0.406201	1.44771	CALR//CD36//DNMT3A//GFI1//CIITA//MSX2//PCNA//SMARCA4//STAT1//TBL1X//KLF10//TWIST1//BHLHE40//WWP2//MLXIPL//HDAC10//LCOR//NAB1//FBXW11//ARID5B//CCL5
GO:0030336	negative regulation of cell migration	Biological process	5	99	271	14742	2.7474	0.0358357	0.406201	1.44568	ALOX15B//BCL2//NF1//TPM1//RAP2C
GO:0046545	development of primary female sexual characteristics	Biological process	5	99	271	14742	2.7474	0.0358357	0.406201	1.44568	BCL2//VGF//EIF2B4//BRCA2//ARID5B
GO:0006633	fatty acid biosynthetic process	Biological process	6	133	271	14742	2.45407	0.0362354	0.409195	1.44087	PTGES//ALOX15B//MGST3//MLXIPL//INSIG1//SCD
GO:0061024	membrane organization	Biological process	18	617	271	14742	1.58699	0.0363053	0.409195	1.44003	CHRNB1//CAV2//LRP8//TNK2//USP20//ITSN2//CXCL16//ANXA3//CD36//UPK2//CALCR//LILRB1//S100A9//NEDD4L//BCL2//TMED2//CALR//SORBS1
GO:0009408	response to heat	Biological process	4	68	271	14742	3.19991	0.0363878	0.409195	1.43904	MKI67//BCL2//EIF2B4//DNAJB4
GO:0001568	blood vessel development	Biological process	14	446	271	14742	1.70758	0.0365725	0.410006	1.43685	S100A7//SLC12A6//CCM2//NF1//ROCK1//STAT1//THBS4//ANXA3//HYAL1//CCL5//TWIST1//HIPK1//WNT2//HPSE
GO:0046777	protein autophosphorylation	Biological process	7	169	271	14742	2.25319	0.0367723	0.410006	1.43448	RAP2C//FGFR1//NTRK2//NTRK3//PAK2//EIF2AK2//CAMKK2
GO:0046677	response to antibiotic	Biological process	3	40	271	14742	4.07989	0.0368324	0.410006	1.43377	HYAL1//CIITA//PPP2CB
GO:0040017	positive regulation of locomotion	Biological process	8	206	271	14742	2.11256	0.0368448	0.410006	1.43362	ANXA3//HYAL1//CCL5//S100A7//BCL2//CXCL16//THBS4//TWIST1
GO:0048667	cell morphogenesis involved in neuron differentiation	Biological process	16	532	271	14742	1.63605	0.0371387	0.4122	1.43017	COL4A5//FGFR1//PAK2//ROCK1//EZR//ARTN//LGI1//TUBB3//MYL9//PLXNA4//BCL2//NTRK3//FOXD2//SSH2//NTRK2//CDH23
GO:0007409	axonogenesis	Biological process	15	490	271	14742	1.66526	0.0375559	0.415749	1.42532	COL4A5//FGFR1//PAK2//ROCK1//EZR//ARTN//LGI1//TUBB3//MYL9//PLXNA4//BCL2//NTRK3//FOXD2//SSH2//NTRK2
GO:0051272	positive regulation of cellular component movement	Biological process	8	207	271	14742	2.10236	0.0377432	0.415969	1.42316	ANXA3//HYAL1//CCL5//S100A7//BCL2//CXCL16//THBS4//TWIST1
GO:0001913	T cell mediated cytotoxicity	Biological process	2	17	271	14742	6.39983	0.0381849	0.415969	1.41811	LILRB1//TAP2
GO:0042119	neutrophil activation	Biological process	2	17	271	14742	6.39983	0.0381849	0.415969	1.41811	ANXA3//CCL5
GO:0045684	positive regulation of epidermis development	Biological process	2	17	271	14742	6.39983	0.0381849	0.415969	1.41811	MSX2//HPSE
GO:0051310	metaphase plate congression	Biological process	2	17	271	14742	6.39983	0.0381849	0.415969	1.41811	PINX1//BRCA2
GO:2000401	regulation of lymphocyte migration	Biological process	2	17	271	14742	6.39983	0.0381849	0.415969	1.41811	S100A7//CCL5
GO:0007265	Ras protein signal transduction	Biological process	12	366	271	14742	1.78356	0.0384901	0.415969	1.41465	ROCK1//RAP2C//NF1//ARHGEF9//ARHGEF18//ITSN2//RASGRP4//PPP2CB//RASGRP1
GO:0051924	regulation of calcium ion transport	Biological process	6	135	271	14742	2.41771	0.0385364	0.415969	1.41413	BCL2//FKBP1B//LILRB1//GNAI2//OPRD1//CCL5
GO:0043433	negative regulation of sequence-specific DNA binding transcription factor activity	Biological process	5	101	271	14742	2.693	0.0385518	0.415969	1.41396	GFI1//MSX2//TWIST1//BHLHE40//WWP2
GO:2000146	negative regulation of cell motility	Biological process	5	101	271	14742	2.693	0.0385518	0.415969	1.41396	ALOX15B//BCL2//NF1//TPM1//RAP2C
GO:0051128	regulation of cellular component organization	Biological process	28	1075	271	14742	1.41689	0.0390109	0.418902	1.40881	WISP2//STAT1//CAV2//SSH2//EZR//ARHGEF18//TWIST1//NTRK2//GFI1//BCL2//HYAL1//LGI1//CXCL16//CDKN2D//SIPA1//SMARCA4//KANK1//ROCK1//S100A9//LILRB1//NEDD4L//NTRK3//PLXNA4//CALR//TPM1//CD36//SORBS1//TNK2
GO:0006885	regulation of pH	Biological process	3	41	271	14742	3.98038	0.0392167	0.418902	1.40653	BCL2//AQP11//RHCG
GO:0051971	positive regulation of transmission of nerve impulse	Biological process	3	41	271	14742	3.98038	0.0392167	0.418902	1.40653	LGI1//NMU//CRHR1
GO:0071229	cellular response to acid	Biological process	3	41	271	14742	3.98038	0.0392167	0.418902	1.40653	DNMT3A//RRAGD//RRAGC
GO:0006720	isoprenoid metabolic process	Biological process	4	70	271	14742	3.10849	0.0398364	0.421514	1.39972	IDI1//MVK//AKR1B10//CRABP2
GO:0010906	regulation of glucose metabolic process	Biological process	4	70	271	14742	3.10849	0.0398364	0.421514	1.39972	NR3C1//C1QTNF3//SORBS1//MLXIPL
GO:0051017	actin filament bundle assembly	Biological process	4	70	271	14742	3.10849	0.0398364	0.421514	1.39972	SORBS1//ROCK1//TPM1//EZR
GO:0048812	neuron projection morphogenesis	Biological process	16	537	271	14742	1.62081	0.0398845	0.421514	1.3992	COL4A5//FGFR1//PAK2//ROCK1//EZR//ARTN//LGI1//TUBB3//MYL9//PLXNA4//BCL2//NTRK3//FOXD2//SSH2//NTRK2//THBS4
GO:0001508	regulation of action potential	Biological process	5	102	271	14742	2.66659	0.0399558	0.421514	1.39842	C11ORF9//NF1//NAB1//KLK6//EIF2B4
GO:0007610	behavior	Biological process	14	452	271	14742	1.68491	0.0401756	0.422786	1.39604	FOS//BCL2//NTRK2//CRHR1//GAA//OPRD1//CDH23//NF1//CCL5//S100A7//CHRNB1//NMU//PLXNA4//THBS4
GO:0010604	positive regulation of macromolecule metabolic process	Biological process	36	1458	271	14742	1.34317	0.0411969	0.431913	1.38514	NR3C1//CCL5//CALR//NTRK2//TWIST1//LILRB1//TMED2//BRCA2//C11ORF9//KLF6//FOS//IRF6//CIITA//SMARCA4//STAT1//TBL1X//TBP//CAMKK2//FBXW11//MLXIPL//RAP2C//TRIB2//BCL2//SORBS1//CBLB//FOXD2//WNT2//RBM14//ZNF292//KLF13//CD36//PAK2//THBS4//TNK2//ANXA3//PSMB9
GO:0030036	actin cytoskeleton organization	Biological process	12	370	271	14742	1.76428	0.0412455	0.431913	1.38462	EZR//BCL2//SSH2//KANK1//CALR//S100A9//ROCK1//SORBS1//TPM1//CXCL1//NF1//ARHGEF18
GO:0002479	antigen processing and presentation of exogenous peptide antigen via MHC class I, TAP-dependent	Biological process	4	71	271	14742	3.06471	0.0416282	0.432191	1.38061	CALR//CD36//PSMB9//TAP2
GO:0050680	negative regulation of epithelial cell proliferation	Biological process	4	71	271	14742	3.06471	0.0416282	0.432191	1.38061	CAV2//NF1//STAT1//BRCA2
GO:0019079	viral genome replication	Biological process	3	42	271	14742	3.88561	0.0416777	0.432191	1.3801	CCL5//OAS1//SLPI
GO:0042308	negative regulation of protein import into nucleus	Biological process	3	42	271	14742	3.88561	0.0416777	0.432191	1.3801	FBXW11//CD36//NF1
GO:0006357	regulation of transcription from RNA polymerase II promoter	Biological process	27	1036	271	14742	1.41772	0.041989	0.432799	1.37686	GFI1//PCNA//CALR//CD36//DNMT3A//CIITA//MSX2//SMARCA4//STAT1//TBL1X//KLF10//TWIST1//BHLHE40//WWP2//MLXIPL//HDAC10//LCOR//KLF6//FOXD2//FOS//WNT2//RBM14//LILRB1//ZNF292//KLF13//CHD2//LITAF
GO:0044281	small molecule metabolic process	Biological process	58	2539	271	14742	1.24266	0.042146	0.432799	1.37524	PTGES//FPGT//GAA//PGM1//PRKACB//PPIP5K1//SLC16A3//NR3C1//GART//NT5E//OAS1//OAS2//NME5//GUCY1A3//GNAI1//GNAI2//RRAGC//RNF213//DNMT3A//FOS//SLC6A14//PSMB9//PHGDH//KYNU//CGA//ALOX15B//AASDH//SCD//INSIG1//IDI1//LSS//MVK//SQLE//CALCR//CRHR1//NTRK2//S1PR3//OPRD1//TPH1//GFI1//TMED2//AKR1B10//CCL5//MGST3//TWIST1//SMAP1//NF1//TPM1//SIPA1//MLXIPL//CRABP2//RGS3//C1QTNF3//SORBS1//ABCG2//MME//CD36//TBL1X
GO:0006111	regulation of gluconeogenesis	Biological process	2	18	271	14742	6.04428	0.0424472	0.432799	1.37215	C1QTNF3//NR3C1
GO:0009651	response to salt stress	Biological process	2	18	271	14742	6.04428	0.0424472	0.432799	1.37215	SLC12A6//CCL5
GO:0033144	negative regulation of intracellular steroid hormone receptor signaling pathway	Biological process	2	18	271	14742	6.04428	0.0424472	0.432799	1.37215	SMARCA4//CALR
GO:0045939	negative regulation of steroid metabolic process	Biological process	2	18	271	14742	6.04428	0.0424472	0.432799	1.37215	INSIG1//GFI1
GO:0051452	intracellular pH reduction	Biological process	2	18	271	14742	6.04428	0.0424472	0.432799	1.37215	BCL2//AQP11
GO:0048589	developmental growth	Biological process	9	251	271	14742	1.95054	0.0427615	0.433854	1.36895	BRCA2//MSX2//KLK6//NTRK3//PLXNA4//FOXD2//WNT2//BCL2//CGA
GO:0035264	multicellular organism growth	Biological process	5	104	271	14742	2.61531	0.0428561	0.433854	1.36799	BCL2//BRCA2//TMED2//ARID5B
GO:0046660	female sex differentiation	Biological process	5	104	271	14742	2.61531	0.0428561	0.433854	1.36799	BCL2//VGF//EIF2B4//BRCA2//ARID5B
GO:0030334	regulation of cell migration	Biological process	11	332	271	14742	1.80236	0.0435191	0.439061	1.36132	ANXA3//HYAL1//CCL5//S100A7//BCL2//CXCL16//ALOX15B//NF1//TPM1//RAP2C//THBS4
GO:0006366	transcription from RNA polymerase II promoter	Biological process	31	1227	271	14742	1.37437	0.0435764	0.439061	1.36075	GFI1//PCNA//CALR//CD36//DNMT3A//CIITA//MSX2//SMARCA4//STAT1//TBL1X//KLF10//TWIST1//BHLHE40//WWP2//MLXIPL//HDAC10//LCOR//RNPS1//CHD2//FOS//LITAF//TBP//KLF6//FOXD2//WNT2//RBM14//LILRB1//ZNF292//KLF13//NR3C1//IRF9
GO:0051052	regulation of DNA metabolic process	Biological process	7	176	271	14742	2.16358	0.0441773	0.439606	1.3548	PCNA//RAD17//DNMT3A//CALR//BRCA2//ANXA3//TWIST1
GO:0050810	regulation of steroid biosynthetic process	Biological process	3	43	271	14742	3.79525	0.0442146	0.439606	1.35443	INSIG1//GFI1//NR3C1
GO:0071418	cellular response to amine stimulus	Biological process	3	43	271	14742	3.79525	0.0442146	0.439606	1.35443	DNMT3A//RRAGD//RRAGC
GO:0006897	endocytosis	Biological process	11	333	271	14742	1.79695	0.0443043	0.439606	1.35355	CXCL16//ANXA3//CD36//CALCR//LILRB1//NEDD4L//CALR//TNK2//LRP8//USP20//ITSN2
GO:0010324	membrane invagination	Biological process	11	333	271	14742	1.79695	0.0443043	0.439606	1.35355	LRP8//TNK2//USP20//ITSN2//CXCL16//ANXA3//CD36//CALCR//LILRB1//NEDD4L//CALR
GO:0030100	regulation of endocytosis	Biological process	5	105	271	14742	2.59041	0.0443526	0.439606	1.35308	LILRB1//NEDD4L//CALR//CD36//TNK2
GO:0030595	leukocyte chemotaxis	Biological process	5	105	271	14742	2.59041	0.0443526	0.439606	1.35308	CCL5//S100A7//CXCL16//THBS4//S100A9
GO:0051094	positive regulation of developmental process	Biological process	17	589	271	14742	1.57008	0.044755	0.442566	1.34916	TWIST1//CD36//BCL2//SMAP1//FGFR1//CCL5//MSX2//KLF10//ANXA3//HYAL1//HIPK1//NTRK3//NTRK2//CDH15//HPSE//WNT2//FOXD2
GO:0045892	negative regulation of transcription, DNA-dependent	Biological process	20	723	271	14742	1.5048	0.0451748	0.445683	1.3451	CALR//CD36//DNMT3A//GFI1//CIITA//MSX2//PCNA//SMARCA4//STAT1//TBL1X//KLF10//TWIST1//BHLHE40//WWP2//MLXIPL//HDAC10//LCOR//NAB1//FBXW11//ARID5B
GO:0051604	protein maturation	Biological process	5	106	271	14742	2.56597	0.0458801	0.448974	1.33838	C9ORF46//CGA//KLK6//CALR//FKBP1B
GO:0009893	positive regulation of metabolic process	Biological process	39	1617	271	14742	1.31202	0.0464709	0.448974	1.33282	NR3C1//CALCR//CRHR1//NTRK2//CCL5//CALR//TWIST1//LILRB1//TMED2//CD36//SORBS1//MLXIPL//BRCA2//C11ORF9//KLF6//FOS//IRF6//CIITA//SMARCA4//STAT1//TBL1X//TBP//CAMKK2//FBXW11//RAP2C//TRIB2//BCL2//CBLB//NF1//FOXD2//WNT2//RBM14//ZNF292//KLF13//PAK2//THBS4//TNK2//ANXA3//PSMB9
GO:0051346	negative regulation of hydrolase activity	Biological process	8	216	271	14742	2.01476	0.046496	0.448974	1.33258	CAST//SLPI//TFPI//TMED2//FKBP1B//CDKN2D//IFI6//PAK2
GO:0045321	leukocyte activation	Biological process	15	505	271	14742	1.6158	0.0467192	0.448974	1.3305	ITGAL//LILRB1//BCL2//LY6D//KLF6//BLNK//PAK2//MPZL2//FKBP1B//CCL5//CBLB//DHRS2//CRHR1//ANXA3//CD47
GO:0043149	stress fiber assembly	Biological process	3	44	271	14742	3.70899	0.0468267	0.448974	1.32951	ROCK1//TPM1//SORBS1
GO:0048483	autonomic nervous system development	Biological process	3	44	271	14742	3.70899	0.0468267	0.448974	1.32951	PLXNA4//FOXD2//NF1
GO:0055008	cardiac muscle tissue morphogenesis	Biological process	3	44	271	14742	3.70899	0.0468267	0.448974	1.32951	WNT2//GAA//TPM1
GO:0014037	Schwann cell differentiation	Biological process	2	19	271	14742	5.72616	0.0468779	0.448974	1.32903	NF1//NAB1
GO:0030194	positive regulation of blood coagulation	Biological process	2	19	271	14742	5.72616	0.0468779	0.448974	1.32903	CD36//HPSE
GO:0043921	modulation by host of viral transcription	Biological process	2	19	271	14742	5.72616	0.0468779	0.448974	1.32903	CCL5//SMARCA4
GO:0045616	regulation of keratinocyte differentiation	Biological process	2	19	271	14742	5.72616	0.0468779	0.448974	1.32903	MSX2//ROCK1
GO:0052472	modulation by host of symbiont transcription	Biological process	2	19	271	14742	5.72616	0.0468779	0.448974	1.32903	CCL5//SMARCA4
GO:1900048	positive regulation of hemostasis	Biological process	2	19	271	14742	5.72616	0.0468779	0.448974	1.32903	CD36//HPSE
GO:0008219	cell death	Biological process	40	1667	271	14742	1.3053	0.0470385	0.449502	1.32755	BCL2//IFI6//CASP1//PAK2//PSMB9//ROCK1//TWIST1//LITAF//ARHGEF9//ARHGEF18//RRAGC//HIPK1//CDKN2D//NR3C1//NME5//ALOX15B//STAT1//KLF10//IFI27//EIF2AK2//CUL2//CALR//BRCA2//MSX2//NF1//LILRB1//ADAR//PPP2CB//DHRS2//NTRK2//CRHR1//CCL5//NTRK3//CHAC1//DAGLA//HYAL1//TBP//UBA1
GO:0007612	learning	Biological process	4	74	271	14742	2.94046	0.0472735	0.450738	1.32538	FOS//CRHR1//NF1//NTRK2
GO:0042098	T cell proliferation	Biological process	5	107	271	14742	2.54199	0.0474386	0.451302	1.32387	LILRB1//ITGAL//CCL5//CBLB//FKBP1B
GO:0016265	death	Biological process	40	1669	271	14742	1.30374	0.0477716	0.453458	1.32083	BCL2//IFI6//CASP1//PAK2//PSMB9//ROCK1//TWIST1//LITAF//ARHGEF9//ARHGEF18//RRAGC//HIPK1//CDKN2D//NR3C1//NME5//ALOX15B//STAT1//KLF10//IFI27//EIF2AK2//DAGLA//HYAL1//TBP//UBA1//CUL2//CALR//BRCA2//MSX2//NF1//LILRB1//ADAR//PPP2CB//DHRS2//NTRK2//CRHR1//CCL5//NTRK3//CHAC1
GO:0080090	regulation of primary metabolic process	Biological process	90	4197	271	14742	1.16652	0.0482376	0.456136	1.31661	CDKN2D//GFI1//PCNA//CALR//CD36//DNMT3A//CIITA//MSX2//SMARCA4//STAT1//TBL1X//KLF10//TWIST1//BHLHE40//WWP2//MLXIPL//HDAC10//LCOR//GNAI2//PXN//RGS3//NR3C1//KLF6//CRABP2//FGFR1//FOXD2//NAB1//SFPQ//ZNF132//ZNF200//PRDM2//RASSF7//IRF9//RBM14//ZNF292//CASZ1//ARGLU1//PRDM12//DMRTA1//SP6//TIGD6//ZNF420//HIPK1//IRF2BP2//ZNF324B//CHD2//FOS//LITAF//EIF2B4//NF1//PAK2//TRIB2//PSMB9//CALCR//CRHR1//NTRK2//S1PR3/…
GO:0002521	leukocyte differentiation	Biological process	10	297	271	14742	1.8316	0.0482717	0.456136	1.31631	BCL2//LY6D//KLF6//BLNK//MPZL2//DHRS2//NF1//CCL5//KLF10//LILRB1
GO:0001503	ossification	Biological process	9	257	271	14742	1.90501	0.0483748	0.456136	1.31538	MSX2//NF1//NAB1//BCL2//KLF10//TUFT1//TWIST1//BMP5//C1ORF9
GO:0060485	mesenchyme development	Biological process	6	143	271	14742	2.28246	0.0486596	0.457809	1.31283	FOXD2//MSX2//TWIST1//BCL2//WNT2//STAT1
GO:0008203	cholesterol metabolic process	Biological process	5	108	271	14742	2.51845	0.0490283	0.459249	1.30955	IDI1//INSIG1//LSS//MVK//SQLE
GO:0051271	negative regulation of cellular component movement	Biological process	5	108	271	14742	2.51845	0.0490283	0.459249	1.30955	ALOX15B//BCL2//NF1//TPM1//RAP2C
GO:0042590	antigen processing and presentation of exogenous peptide antigen via MHC class I	Biological process	4	75	271	14742	2.90125	0.0492451	0.459751	1.30764	CALR//CD36//PSMB9//TAP2
GO:0051240	positive regulation of multicellular organismal process	Biological process	13	423	271	14742	1.67182	0.0493606	0.459751	1.30662	TPM1//NMU//HPSE//CD36//CCL5//C11ORF9//TWIST1//BCL2//LGI1//MSX2//WNT2//CRHR1//FOXD2
GO:0008306	associative learning	Biological process	3	45	271	14742	3.62657	0.0495134	0.459751	1.30528	FOS//CRHR1//NF1
GO:0071417	cellular response to organic nitrogen	Biological process	3	45	271	14742	3.62657	0.0495134	0.459751	1.30528	DNMT3A//RRAGD//RRAGC

## Sheet: BP_down
#Column "GO.ID" stands for the ID of gene ontology term
#Column "Term" stands for the name of gene ontology term
#Column "Ontology" stands for the ontology of GOID belongs to
#Column "Count" stands for the number of DE genes associated with the listed GOID
#Column "Pop.Hits" stands for the number of background population genes associated with the listed GOID
#Column "List.Total" stands for the total number of DE genes
#Column "Pop.Total" stands for the total number of background population genes
#Column "Fold.Enrichment" stands for the Fold Enrichment value of the GOID, it equals (Count/Pop.Hits)/(List.Total/Pop.Total)
#Column "Pvalue" stands for the significance testing value of the GOID
#Column "FDR" stands for the false discovery rate of the GOID, using Benjamini & Hochberg (1995) method
#Column "Enrichment.Score" stands for the Enrichment Score value of the GOID, it equals (-log10(Pvalue))
#Column "GENES" stands for the DE genes associated with the GOID
GO.ID	Term	Ontology	Count	Pop.Hits	List.Total	Pop.Total	Fold.Enrichment	Pvalue	FDR	Enrichment.Score	GENES
GO:0007049	cell cycle	Biological process	73	1326	459	14742	1.76817	9.84267e-07	0.00228057	6.00689	PRC1//ESPL1//BUB1B//CDC6//MCM3//PSMD2//RFC2//RPA1//CDC45//CHEK2//ANAPC5//MCM8//GTPBP4//BCCIP//E2F2//RHOU//RFC1//POLD3//CKAP5//DCTN2//KHDRBS1//CDK5RAP2//BUB1//CENPC1//SMC3//AURKB//KNTC1//KIF20A//NUP133//CENPM//NUP85//MLH1//HDAC1//AURKA//TOP2B//OVOL2//MUC1//EIF4G2//PRKAB2//PRKAG1//MAP2K6//SEPT2//NEDD9//TIMELESS//NOLC1//NCAPD2//PDS5A//NCAPH//CD2AP//NCAPG2//HAUS4//NCAPG//KLHDC3//FANCA//CYP26B1//BRCC3…
GO:0000087	M phase of mitotic cell cycle	Biological process	29	353	459	14742	2.63856	1.99745e-06	0.00228057	5.69952	ESPL1//ANAPC5//BUB1//BUB1B//CENPC1//SMC3//AURKB//KNTC1//CKAP5//NUP133//CENPM//NUP85//CDC6//SEPT2//NEDD9//AURKA//TIMELESS//NOLC1//NCAPD2//DCTN2//PDS5A//NCAPH//CD2AP//NCAPG2//HAUS4//NCAPG//BMP7//CHEK2//KIF20A
GO:0000278	mitotic cell cycle	Biological process	47	742	459	14742	2.03441	2.85135e-06	0.00228057	5.54495	PRC1//ESPL1//CDC6//CDC45//E2F2//MCM3//PSMD2//RPA1//RHOU//MCM8//RFC1//RFC2//POLD3//CKAP5//DCTN2//KHDRBS1//CHEK2//ANAPC5//CDK5RAP2//BUB1//BUB1B//CENPC1//SMC3//AURKB//KNTC1//KIF20A//NUP133//CENPM//NUP85//SEPT2//NEDD9//AURKA//TIMELESS//NOLC1//NCAPD2//PDS5A//NCAPH//CD2AP//NCAPG2//HAUS4//NCAPG//SMARCA4//BMP7//FOXC1//TOP2B//HDAC1
GO:0000279	M phase	Biological process	36	503	459	14742	2.29868	3.04191e-06	0.00228057	5.51685	PRC1//ESPL1//BUB1//BUB1B//CENPC1//SMC3//AURKB//KNTC1//CKAP5//KIF20A//NUP133//CENPM//NUP85//ANAPC5//MLH1//TOP2B//AURKA//DCTN2//CDC6//SEPT2//NEDD9//TIMELESS//NOLC1//NCAPD2//PDS5A//NCAPH//CD2AP//NCAPG2//HAUS4//NCAPG//RPA1//KLHDC3//FANCA//CYP26B1//BMP7//CHEK2
GO:0000280	nuclear division	Biological process	28	342	459	14742	2.62951	3.21056e-06	0.00228057	5.49342	ESPL1//ANAPC5//BUB1//BUB1B//CENPC1//SMC3//AURKB//KNTC1//CKAP5//NUP133//CENPM//NUP85//CDC6//SEPT2//NEDD9//AURKA//TIMELESS//NOLC1//NCAPD2//DCTN2//PDS5A//NCAPH//CD2AP//NCAPG2//HAUS4//NCAPG//BMP7//CHEK2
GO:0007067	mitosis	Biological process	28	342	459	14742	2.62951	3.21056e-06	0.00228057	5.49342	ESPL1//ANAPC5//BUB1//BUB1B//CENPC1//SMC3//AURKB//KNTC1//CKAP5//NUP133//CENPM//NUP85//NCAPD2//NCAPH//NCAPG//BMP7//AURKA//CDC6//CHEK2//SEPT2//NEDD9//TIMELESS//NOLC1//DCTN2//PDS5A//CD2AP//NCAPG2//HAUS4
GO:0044238	primary metabolic process	Biological process	307	8366	459	14742	1.17859	4.13921e-06	0.00252019	5.38308	MLH1//CDC6//MCM3//NASP//RFC2//RPA1//RRM1//CDC45//POLQ//MCM8//GTPBP4//BCCIP//SLC25A10//GCLC//MTHFD1//DDX5//DNMT3A//BPTF//HDAC1//MDM4//SALL2//SMARCA4//SOX3//ZNF189//NRIP1//FZD8//AURKB//TXNIP//SPEN//HEY2//SUZ12//ZMYND8//SPDEF//HDAC8//EHMT1//GSC//RPL28//SMG5//DCP1A//UPF3B//DCP1B//MAP3K5//MAPK1//KIDINS220//GRM4//PIK3CB//MAP2K6//DUSP2//BLMH//PSMD2//TRIP12//OS9//CNOT4//DDX23//SF3B1//DBR1//HNRNPM//CDC5L/…
GO:0048285	organelle fission	Biological process	28	356	459	14742	2.52611	6.90355e-06	0.00347106	5.16093	ESPL1//ANAPC5//BUB1//BUB1B//CENPC1//SMC3//AURKB//KNTC1//CKAP5//NUP133//CENPM//NUP85//CDC6//SEPT2//NEDD9//AURKA//TIMELESS//NOLC1//NCAPD2//DCTN2//PDS5A//NCAPH//CD2AP//NCAPG2//HAUS4//NCAPG//BMP7//CHEK2
GO:0022403	cell cycle phase	Biological process	49	815	459	14742	1.931	7.32979e-06	0.00347106	5.13491	PRC1//ESPL1//CDC6//CDC45//E2F2//MCM3//PSMD2//RPA1//RHOU//MCM8//RFC1//RFC2//POLD3//CKAP5//DCTN2//KHDRBS1//CHEK2//ANAPC5//CDK5RAP2//BUB1//BUB1B//CENPC1//SMC3//AURKB//KNTC1//KIF20A//NUP133//CENPM//NUP85//MLH1//TOP2B//AURKA//SEPT2//NEDD9//TIMELESS//NOLC1//NCAPD2//PDS5A//NCAPH//CD2AP//NCAPG2//HAUS4//NCAPG//KLHDC3//FANCA//CYP26B1//SMARCA4//BMP7
GO:0048523	negative regulation of cellular process	Biological process	117	2594	459	14742	1.44864	1.05292e-05	0.00448756	4.9776	MLH1//BUB1B//CDC6//MCM3//PSMD2//RFC2//RPA1//CDC45//CHEK2//ANAPC5//MCM8//DDX5//DNMT3A//BPTF//HDAC1//MDM4//SALL2//SMARCA4//SOX3//ZNF189//NRIP1//FZD8//AURKB//TXNIP//SPEN//HEY2//SUZ12//ZMYND8//SPDEF//HDAC8//EHMT1//GSC//DUSP2//PALM3//ADM//TMSB15A//FOXC1//GCLC//NRG1//HSPA9//MUC1//TXNDC5//EIF4G2//PRKAB2//PRKAG1//MAP2K6//KHDRBS1//BUB1//KNTC1//ADAM10//DSCAM//ERBB3//RAB7A//GRM4//CTNNA1//TTF1//PDS5A//GTPBP4…
GO:0022402	cell cycle process	Biological process	55	1000	459	14742	1.76647	2.58437e-05	0.00995312	4.58765	PRC1//ESPL1//BUB1B//CDC6//MCM3//PSMD2//RFC2//RPA1//CDC45//CHEK2//ANAPC5//MCM8//E2F2//RHOU//RFC1//POLD3//CKAP5//DCTN2//KHDRBS1//CDK5RAP2//BUB1//CENPC1//SMC3//AURKB//KNTC1//KIF20A//NUP133//CENPM//NUP85//MLH1//TOP2B//MUC1//EIF4G2//PRKAB2//PRKAG1//MAP2K6//AURKA//SEPT2//NEDD9//TIMELESS//NOLC1//NCAPD2//PDS5A//NCAPH//CD2AP//NCAPG2//HAUS4//NCAPG//KLHDC3//FANCA//CYP26B1//BRCC3//MDM4//SMARCA4//BMP7
GO:0007051	spindle organization	Biological process	11	78	459	14742	4.52941	2.80238e-05	0.00995312	4.55247	PRC1//ESPL1//SMC3//DCTN2//HAUS4//AURKB//MLH1//CHEK2//BUB1B//AURKA//CKAP5
GO:0006271	DNA strand elongation involved in DNA replication	Biological process	7	32	459	14742	7.02574	4.64045e-05	0.0152135	4.33344	MCM3//RFC1//RFC2//RPA1//CDC45//POLD3//MCM8
GO:2000113	negative regulation of cellular macromolecule biosynthetic process	Biological process	46	810	459	14742	1.82397	5.8037e-05	0.0174968	4.2363	DDX5//DNMT3A//BPTF//HDAC1//MDM4//SALL2//SMARCA4//SOX3//ZNF189//NRIP1//FZD8//AURKB//TXNIP//SPEN//HEY2//SUZ12//ZMYND8//SPDEF//HDAC8//EHMT1//GSC//CDC6//TTF1//PDS5A//GTPBP4//MUC1//OVOL2//MAF1//BCL3//BMP7//GCLC//NRG1//ATP8B1//XRCC5//TIMELESS//LRRFIP1//BCLAF1//YAF2//RAMP3//KHDRBS1//TH1L//CAPRIN1//EIF2AK1//EIF2B5//SMC3//PASK
GO:0048519	negative regulation of biological process	Biological process	122	2838	459	14742	1.38067	6.15795e-05	0.0174968	4.21056	MLH1//BUB1B//CDC6//MCM3//PSMD2//RFC2//RPA1//CDC45//CHEK2//ANAPC5//MCM8//DDX5//DNMT3A//BPTF//HDAC1//MDM4//SALL2//SMARCA4//SOX3//ZNF189//NRIP1//FZD8//AURKB//TXNIP//SPEN//HEY2//SUZ12//ZMYND8//SPDEF//HDAC8//EHMT1//GSC//DUSP2//PALM3//ADM//TMSB15A//FOXC1//GCLC//NRG1//HSPA9//MUC1//TXNDC5//EIF4G2//PRKAB2//PRKAG1//MAP2K6//KHDRBS1//BUB1//KNTC1//ADAM10//DSCAM//ERBB3//RAB7A//GRM4//CTNNA1//TTF1//PDS5A//GTPBP4…
GO:0008152	metabolic process	Biological process	323	9124	459	14742	1.137	6.95098e-05	0.0185157	4.15795	MLH1//CDC6//MCM3//NASP//RFC2//RPA1//RRM1//CDC45//POLQ//MCM8//GTPBP4//BCCIP//SLC25A10//GCLC//MTHFD1//DDX5//DNMT3A//BPTF//HDAC1//MDM4//SALL2//SMARCA4//SOX3//ZNF189//NRIP1//FZD8//AURKB//TXNIP//SPEN//HEY2//SUZ12//ZMYND8//SPDEF//HDAC8//EHMT1//GSC//RPL28//SMG5//DCP1A//UPF3B//DCP1B//MAP3K5//MAPK1//KIDINS220//GRM4//PIK3CB//MAP2K6//DUSP2//BLMH//PSMD2//TRIP12//OS9//CNOT4//DDX23//SF3B1//DBR1//HNRNPM//CDC5L/…
GO:0022616	DNA strand elongation	Biological process	7	35	459	14742	6.42353	8.55179e-05	0.0214399	4.06794	MCM3//RFC1//RFC2//RPA1//CDC45//POLD3//MCM8
GO:0010558	negative regulation of macromolecule biosynthetic process	Biological process	46	838	459	14742	1.76302	0.000129168	0.0293875	3.88885	DDX5//DNMT3A//BPTF//HDAC1//MDM4//SALL2//SMARCA4//SOX3//ZNF189//NRIP1//FZD8//AURKB//TXNIP//SPEN//HEY2//SUZ12//ZMYND8//SPDEF//HDAC8//EHMT1//GSC//CDC6//TTF1//PDS5A//GTPBP4//MUC1//OVOL2//MAF1//BCL3//BMP7//GCLC//NRG1//ATP8B1//XRCC5//TIMELESS//LRRFIP1//BCLAF1//YAF2//RAMP3//KHDRBS1//TH1L//CAPRIN1//EIF2AK1//EIF2B5//SMC3//PASK
GO:0010948	negative regulation of cell cycle process	Biological process	11	92	459	14742	3.84015	0.00013101	0.0293875	3.8827	CDC6//CDC45//BUB1//BUB1B//ANAPC5//SMC3//SMARCA4//BMP7//ESPL1//CDK5RAP2//MDM4
GO:0031327	negative regulation of cellular biosynthetic process	Biological process	49	916	459	14742	1.71808	0.000144459	0.0307843	3.84025	DDX5//DNMT3A//BPTF//HDAC1//MDM4//SALL2//SMARCA4//SOX3//ZNF189//NRIP1//FZD8//AURKB//TXNIP//SPEN//HEY2//SUZ12//ZMYND8//SPDEF//HDAC8//EHMT1//GSC//GRM4//CDC6//TTF1//PDS5A//GTPBP4//MUC1//OVOL2//MAF1//BCL3//BMP7//GCLC//NRG1//ATP8B1//XRCC5//TIMELESS//LRRFIP1//BCLAF1//YAF2//RAMP3//KHDRBS1//TH1L//CAPRIN1//EIF2AK1//ATP1A1//EIF2B5//SMC3//GLA//PASK
GO:0007219	Notch signaling pathway	Biological process	10	79	459	14742	4.06552	0.00016345	0.0331726	3.78661	BMP7//HEY2//OVOL2//ADAM10//FOXC1//NRG1//NOTCH4//SPEN//DLL1//APH1A
GO:0043170	macromolecule metabolic process	Biological process	252	6871	459	14742	1.17794	0.000180904	0.035046	3.74255	MLH1//CDC6//MCM3//NASP//RFC2//RPA1//RRM1//CDC45//POLQ//MCM8//GTPBP4//BCCIP//DDX5//DNMT3A//BPTF//HDAC1//MDM4//SALL2//SMARCA4//SOX3//ZNF189//NRIP1//FZD8//AURKB//TXNIP//SPEN//HEY2//SUZ12//ZMYND8//SPDEF//HDAC8//EHMT1//GSC//RPL28//SMG5//DCP1A//UPF3B//DCP1B//MAP3K5//MAPK1//KIDINS220//GRM4//PIK3CB//MAP2K6//DUSP2//BLMH//PSMD2//TRIP12//OS9//CNOT4//DDX23//SF3B1//DBR1//HNRNPM//CDC5L//CSTF3//HNRNPA2B1//HNRNP…
GO:0010605	negative regulation of macromolecule metabolic process	Biological process	56	1108	459	14742	1.62327	0.00021137	0.0376891	3.67496	MLH1//DDX5//DNMT3A//BPTF//HDAC1//MDM4//SALL2//SMARCA4//SOX3//ZNF189//NRIP1//FZD8//AURKB//TXNIP//SPEN//HEY2//SUZ12//ZMYND8//SPDEF//HDAC8//EHMT1//GSC//CDC6//TTF1//PDS5A//GTPBP4//PGR//MUC1//OVOL2//CELF1//MAF1//BCL3//BMP7//GCLC//NRG1//ATP8B1//XRCC5//TIMELESS//LRRFIP1//BCLAF1//YAF2//RAMP3//KHDRBS1//TH1L//CAPRIN1//EIF2AK1//ZCCHC11//USP4//EIF2B5//HSP90AB1//SMC3//AKAP1//PASK//BUB1B//PSMD2//ANAPC5
GO:0009890	negative regulation of biosynthetic process	Biological process	49	931	459	14742	1.6904	0.000212233	0.0376891	3.67319	DDX5//DNMT3A//BPTF//HDAC1//MDM4//SALL2//SMARCA4//SOX3//ZNF189//NRIP1//FZD8//AURKB//TXNIP//SPEN//HEY2//SUZ12//ZMYND8//SPDEF//HDAC8//EHMT1//GSC//GRM4//CDC6//TTF1//PDS5A//GTPBP4//MUC1//OVOL2//MAF1//BCL3//BMP7//GCLC//NRG1//ATP8B1//XRCC5//TIMELESS//LRRFIP1//BCLAF1//YAF2//RAMP3//KHDRBS1//TH1L//CAPRIN1//EIF2AK1//ATP1A1//EIF2B5//SMC3//GLA//PASK
GO:0051301	cell division	Biological process	28	437	459	14742	2.05788	0.000255848	0.0436169	3.59202	PRC1//AURKB//ESPL1//KIF20A//PIK3CB//TXNIP//CDC6//BUB1//BUB1B//LLGL2//SEPT2//NEDD9//AURKA//CDC14A//TIMELESS//SMC3//VPS4B//KNTC1//CKAP5//NCAPD2//CHEK2//PDS5A//NCAPH//CD2AP//ANAPC5//NCAPG2//HAUS4//NCAPG
GO:0000236	mitotic prometaphase	Biological process	10	85	459	14742	3.77855	0.000300727	0.0481789	3.52183	BUB1//BUB1B//CENPC1//SMC3//AURKB//KNTC1//CKAP5//NUP133//CENPM//NUP85
GO:0009892	negative regulation of metabolic process	Biological process	60	1228	459	14742	1.56927	0.000305216	0.0481789	3.51539	MLH1//DDX5//DNMT3A//BPTF//HDAC1//MDM4//SALL2//SMARCA4//SOX3//ZNF189//NRIP1//FZD8//AURKB//TXNIP//SPEN//HEY2//SUZ12//ZMYND8//SPDEF//HDAC8//EHMT1//GSC//GRM4//CDC6//TTF1//PDS5A//GTPBP4//PGR//MUC1//OVOL2//CELF1//MAF1//BCL3//BMP7//GCLC//NRG1//ATP8B1//XRCC5//TIMELESS//LRRFIP1//BCLAF1//YAF2//RAMP3//KHDRBS1//TH1L//CAPRIN1//EIF2AK1//ZCCHC11//USP4//ATP1A1//EIF2B5//HSP90AB1//SMC3//AKAP1//GLA//PASK//BUB1B//PS…
GO:0016043	cellular component organization	Biological process	150	3772	459	14742	1.27721	0.000332485	0.050609	3.47823	PRC1//RPA1//ESPL1//ANAPC5//CDK5RAP2//BUB1//BUB1B//CENPC1//SMC3//AURKB//KNTC1//CKAP5//NUP133//CENPM//NUP85//DDX23//PIH1D1//RFC1//RFC2//POLD3//XRCC5//TOP2B//NET1//KIF20A//SYT7//MYOF//BMP7//HIF1A//PMAIP1//NOTCH4//ADM//AHI1//HEY2//HDAC8//H2AFY//NASP//NEDD9//TMSB15A//CAPZB//ARFIP2//RHOU//FHDC1//ARC//PACSIN1//FAM40B//CAMSAP1//AIFM1//SMARCA4//SMARCB1//BPTF//HDAC1//TTF1//DNMT3A//CELF1//RPL28//FANCA//LAMC…
GO:0031324	negative regulation of cellular metabolic process	Biological process	56	1130	459	14742	1.59167	0.000346753	0.0509607	3.45998	MLH1//DDX5//DNMT3A//BPTF//HDAC1//MDM4//SALL2//SMARCA4//SOX3//ZNF189//NRIP1//FZD8//AURKB//TXNIP//SPEN//HEY2//SUZ12//ZMYND8//SPDEF//HDAC8//EHMT1//GSC//GRM4//CDC6//TTF1//PDS5A//GTPBP4//MUC1//OVOL2//MAF1//BCL3//BMP7//GCLC//NRG1//ATP8B1//XRCC5//TIMELESS//LRRFIP1//BCLAF1//YAF2//RAMP3//KHDRBS1//TH1L//CAPRIN1//EIF2AK1//USP4//ATP1A1//EIF2B5//HSP90AB1//SMC3//AKAP1//GLA//PASK//BUB1B//PSMD2//ANAPC5
GO:0044237	cellular metabolic process	Biological process	291	8211	459	14742	1.13826	0.000404274	0.0574339	3.39332	MLH1//CDC6//MCM3//NASP//RFC2//RPA1//RRM1//CDC45//POLQ//MCM8//GTPBP4//BCCIP//SLC25A10//GCLC//MTHFD1//DDX5//DNMT3A//BPTF//HDAC1//MDM4//SALL2//SMARCA4//SOX3//ZNF189//NRIP1//FZD8//AURKB//TXNIP//SPEN//HEY2//SUZ12//ZMYND8//SPDEF//HDAC8//EHMT1//GSC//RPL28//SMG5//DCP1A//UPF3B//DCP1B//MAP3K5//MAPK1//KIDINS220//GRM4//PIK3CB//MAP2K6//DUSP2//BLMH//PSMD2//TRIP12//OS9//CNOT4//DDX23//SF3B1//DBR1//HNRNPM//CDC5L/…
GO:0071840	cellular component organization or biogenesis	Biological process	153	3883	459	14742	1.26552	0.00043614	0.0599622	3.36037	RCL1//GTPBP4//GNL2//PRC1//RPA1//ESPL1//ANAPC5//CDK5RAP2//BUB1//BUB1B//CENPC1//SMC3//AURKB//KNTC1//CKAP5//NUP133//CENPM//NUP85//DDX23//PIH1D1//RFC1//RFC2//POLD3//XRCC5//TOP2B//NET1//KIF20A//SYT7//MYOF//BMP7//HIF1A//PMAIP1//NOTCH4//ADM//AHI1//HEY2//HDAC8//H2AFY//NASP//NEDD9//TMSB15A//CAPZB//ARFIP2//RHOU//FHDC1//ARC//PACSIN1//FAM40B//CAMSAP1//AIFM1//SMARCA4//SMARCB1//BPTF//HDAC1//TTF1//DNMT3A//NOLC1…
GO:0051172	negative regulation of nitrogen compound metabolic process	Biological process	45	862	459	14742	1.67668	0.000461498	0.0614658	3.33583	MLH1//DDX5//DNMT3A//BPTF//HDAC1//MDM4//SALL2//SMARCA4//SOX3//ZNF189//NRIP1//FZD8//AURKB//TXNIP//SPEN//HEY2//SUZ12//ZMYND8//SPDEF//HDAC8//EHMT1//GSC//GRM4//CDC6//TTF1//PDS5A//GTPBP4//MUC1//OVOL2//MAF1//BCL3//BMP7//GCLC//NRG1//ATP8B1//XRCC5//TIMELESS//LRRFIP1//BCLAF1//YAF2//RAMP3//KHDRBS1//TH1L//SMC3//GLA
GO:0000377	RNA splicing, via transesterification reactions with bulged adenosine as nucleophile	Biological process	16	203	459	14742	2.53144	0.000627328	0.0786374	3.20251	DDX23//HNRNPM//DDX5//CDC5L//CSTF3//HNRNPA2B1//HNRNPD//HNRNPR//PAPOLA//SF3B2//RALY//SF3B1//DBR1//ISY1//UPF3B//CELF1
GO:0000398	nuclear mRNA splicing, via spliceosome	Biological process	16	203	459	14742	2.53144	0.000627328	0.0786374	3.20251	DDX23//HNRNPM//DDX5//CELF1//CDC5L//CSTF3//HNRNPA2B1//HNRNPD//HNRNPR//PAPOLA//SF3B2//RALY//SF3B1//DBR1//ISY1//UPF3B
GO:0045934	negative regulation of nucleobase-containing compound metabolic process	Biological process	44	854	459	14742	1.65477	0.000700651	0.0841036	3.1545	MLH1//DDX5//DNMT3A//BPTF//HDAC1//MDM4//SALL2//SMARCA4//SOX3//ZNF189//NRIP1//FZD8//AURKB//TXNIP//SPEN//HEY2//SUZ12//ZMYND8//SPDEF//HDAC8//EHMT1//GSC//GRM4//CDC6//TTF1//PDS5A//GTPBP4//MUC1//OVOL2//MAF1//BCL3//BMP7//GCLC//NRG1//ATP8B1//XRCC5//TIMELESS//LRRFIP1//BCLAF1//YAF2//RAMP3//KHDRBS1//TH1L//SMC3
GO:0045786	negative regulation of cell cycle	Biological process	27	443	459	14742	1.95751	0.000710401	0.0841036	3.1485	BUB1B//CDC6//MCM3//PSMD2//RFC2//RPA1//CDC45//CHEK2//ANAPC5//MCM8//MUC1//EIF4G2//PRKAB2//PRKAG1//MAP2K6//KHDRBS1//BUB1//KNTC1//BRCC3//SMARCA4//BMP7//FOXC1//TOP2B//MDM4//HDAC1//PPP1R13B
GO:0009112	nucleobase metabolic process	Biological process	8	64	459	14742	4.01471	0.000796843	0.0915064	3.09863	AMPD3//NT5C2//DPYD//UMPS//UCK1//DPYSL5//SHMT1//MAPK1
GO:0000375	RNA splicing, via transesterification reactions	Biological process	16	208	459	14742	2.47059	0.000815872	0.0915064	3.08838	DDX23//HNRNPM//DDX5//CDC5L//CSTF3//HNRNPA2B1//HNRNPD//HNRNPR//PAPOLA//SF3B2//RALY//SF3B1//DBR1//ISY1//UPF3B//CELF1
GO:0006312	mitotic recombination	Biological process	6	37	459	14742	5.20827	0.000902672	0.0986458	3.04447	MLH1//RFC1//RFC2//RPA1//POLD3//TOP2B
GO:0044260	cellular macromolecule metabolic process	Biological process	227	6231	459	14742	1.17007	0.000954902	0.101745	3.02004	MLH1//CDC6//MCM3//NASP//RFC2//RPA1//RRM1//CDC45//POLQ//MCM8//GTPBP4//BCCIP//DDX5//DNMT3A//BPTF//HDAC1//MDM4//SALL2//SMARCA4//SOX3//ZNF189//NRIP1//FZD8//AURKB//TXNIP//SPEN//HEY2//SUZ12//ZMYND8//SPDEF//HDAC8//EHMT1//GSC//RPL28//SMG5//DCP1A//UPF3B//DCP1B//MAP3K5//MAPK1//KIDINS220//GRM4//PIK3CB//MAP2K6//DUSP2//BLMH//PSMD2//TRIP12//OS9//CNOT4//DDX23//SF3B1//DBR1//HNRNPM//CDC5L//CSTF3//HNRNPA2B1//HNRNP…
GO:0006139	nucleobase-containing compound metabolic process	Biological process	186	4970	459	14742	1.20199	0.00115345	0.119902	2.938	MLH1//CDC6//MCM3//NASP//RFC2//RPA1//RRM1//CDC45//POLQ//MCM8//DDX5//DNMT3A//BPTF//HDAC1//MDM4//SALL2//SMARCA4//SOX3//ZNF189//NRIP1//FZD8//AURKB//TXNIP//SPEN//HEY2//SUZ12//ZMYND8//SPDEF//HDAC8//EHMT1//GSC//RPL28//SMG5//DCP1A//UPF3B//DCP1B//CNOT4//DDX23//SF3B1//DBR1//HNRNPM//CDC5L//CSTF3//HNRNPA2B1//HNRNPD//HNRNPR//PAPOLA//SF3B2//RALY//ISY1//NCOA1//TOP2B//ERCC5//RFC1//POLD3//XRCC5//TTF1//TADA2A//XBP…
GO:0007220	Notch receptor processing	Biological process	4	16	459	14742	8.02941	0.00125311	0.124479	2.90201	ADAM10//NOTCH4//DLL1//APH1A
GO:0071842	cellular component organization at cellular level	Biological process	119	2963	459	14742	1.28991	0.00125588	0.124479	2.90105	PRC1//RPA1//ESPL1//ANAPC5//CDK5RAP2//BUB1//BUB1B//CENPC1//SMC3//AURKB//KNTC1//CKAP5//NUP133//CENPM//NUP85//DDX23//PIH1D1//RFC1//RFC2//POLD3//XRCC5//TOP2B//KIF20A//PMAIP1//HDAC8//H2AFY//NASP//NEDD9//TMSB15A//CAPZB//ARFIP2//RHOU//FHDC1//ARC//PACSIN1//FAM40B//CAMSAP1//AIFM1//SMARCA4//SMARCB1//BPTF//HDAC1//TTF1//DNMT3A//CELF1//RPL28//CD2AP//GORASP2//NOLC1//CXADR//SPG7//EVL//COG2//VPS4B//ALS2//FAM109B…
GO:0071841	cellular component organization or biogenesis at cellular level	Biological process	122	3061	459	14742	1.28009	0.00142377	0.135922	2.84656	RCL1//GTPBP4//GNL2//PRC1//RPA1//ESPL1//ANAPC5//CDK5RAP2//BUB1//BUB1B//CENPC1//SMC3//AURKB//KNTC1//CKAP5//NUP133//CENPM//NUP85//DDX23//PIH1D1//RFC1//RFC2//POLD3//XRCC5//TOP2B//KIF20A//PMAIP1//HDAC8//H2AFY//NASP//NEDD9//TMSB15A//CAPZB//ARFIP2//RHOU//FHDC1//ARC//PACSIN1//FAM40B//CAMSAP1//AIFM1//SMARCA4//SMARCB1//BPTF//HDAC1//TTF1//DNMT3A//NOLC1//CELF1//RPL28//CD2AP//GORASP2//CXADR//SPG7//EVL//COG2//…
GO:0031323	regulation of cellular metabolic process	Biological process	163	4287	459	14742	1.22117	0.00143512	0.135922	2.84311	MLH1//CDC6//GTPBP4//BCCIP//CDC45//DDX5//DNMT3A//BPTF//HDAC1//MDM4//SALL2//SMARCA4//SOX3//ZNF189//NRIP1//FZD8//AURKB//TXNIP//SPEN//HEY2//SUZ12//ZMYND8//SPDEF//HDAC8//EHMT1//GSC//MAP3K5//MAPK1//KIDINS220//GRM4//PIK3CB//MAP2K6//DUSP2//NCOA1//RAMP3//AHI1//PPP1R3C//PRKAG1//SMC3//CDC5L//CREBL2//E2F2//FOXC1//FOXD4//HIF1A//HNRNPD//FOXK2//MYCL1//NHLH2//NONO//CNOT4//PDE8A//RFC1//SIX1//TADA2A//THRSP//TTF1//…
GO:0019222	regulation of metabolic process	Biological process	177	4717	459	14742	1.20518	0.00147862	0.136997	2.83014	MLH1//CDC6//GTPBP4//BCCIP//CDC45//DDX5//DNMT3A//BPTF//HDAC1//MDM4//SALL2//SMARCA4//SOX3//ZNF189//NRIP1//FZD8//AURKB//TXNIP//SPEN//HEY2//SUZ12//ZMYND8//SPDEF//HDAC8//EHMT1//GSC//MAP3K5//MAPK1//KIDINS220//GRM4//PIK3CB//MAP2K6//DUSP2//NCOA1//RAMP3//AHI1//PPP1R3C//PRKAG1//SMC3//GNAS//CDC5L//CREBL2//E2F2//FOXC1//FOXD4//HIF1A//HNRNPD//FOXK2//MYCL1//NHLH2//NONO//CNOT4//PDE8A//RFC1//SIX1//TADA2A//THRSP//…
GO:0006261	DNA-dependent DNA replication	Biological process	9	88	459	14742	3.28476	0.00164625	0.149279	2.7835	MCM3//CDC45//RFC1//RFC2//RPA1//POLD3//MCM8//SMC3//TOP2B
GO:0042475	odontogenesis of dentin-containing tooth	Biological process	7	56	459	14742	4.01471	0.00168122	0.149279	2.77437	ADM//BMP7//CA2//CTNNA1//EDA//FOXC1//HDAC1
GO:0090304	nucleic acid metabolic process	Biological process	159	4183	459	14742	1.22082	0.00173094	0.150557	2.76172	MLH1//CDC6//MCM3//NASP//RFC2//RPA1//RRM1//CDC45//POLQ//MCM8//DDX5//DNMT3A//BPTF//HDAC1//MDM4//SALL2//SMARCA4//SOX3//ZNF189//NRIP1//FZD8//AURKB//TXNIP//SPEN//HEY2//SUZ12//ZMYND8//SPDEF//HDAC8//EHMT1//GSC//RPL28//SMG5//DCP1A//UPF3B//DCP1B//CNOT4//DDX23//SF3B1//DBR1//HNRNPM//CDC5L//CSTF3//HNRNPA2B1//HNRNPD//HNRNPR//PAPOLA//SF3B2//RALY//ISY1//NCOA1//TOP2B//ERCC5//RFC1//POLD3//XRCC5//TTF1//TADA2A//XBP…
GO:0071456	cellular response to hypoxia	Biological process	6	42	459	14742	4.58824	0.00178669	0.152298	2.74795	BMP7//HIF1A//MDM4//PMAIP1//VLDLR//STC2
GO:0006996	organelle organization	Biological process	81	1904	459	14742	1.36635	0.00194171	0.16217	2.71182	PRC1//RPA1//ESPL1//ANAPC5//CDK5RAP2//BUB1//BUB1B//CENPC1//SMC3//AURKB//KNTC1//CKAP5//NUP133//CENPM//NUP85//RFC1//RFC2//POLD3//XRCC5//TOP2B//KIF20A//PMAIP1//HDAC8//H2AFY//NASP//NEDD9//TMSB15A//CAPZB//ARFIP2//RHOU//FHDC1//ARC//PACSIN1//FAM40B//CAMSAP1//SMARCA4//SMARCB1//BPTF//HDAC1//TTF1//DNMT3A//NOLC1//CXADR//SPG7//EVL//COG2//GORASP2//VPS4B//ALS2//FAM109B//AURKA//DCTN2//CDC6//SEPT2//TIMELESS//NCAP…
GO:0006807	nitrogen compound metabolic process	Biological process	201	5488	459	14742	1.17632	0.00197862	0.16217	2.70364	MLH1//CDC6//MCM3//NASP//RFC2//RPA1//RRM1//CDC45//POLQ//MCM8//SLC25A10//GCLC//MTHFD1//DDX5//DNMT3A//BPTF//HDAC1//MDM4//SALL2//SMARCA4//SOX3//ZNF189//NRIP1//FZD8//AURKB//TXNIP//SPEN//HEY2//SUZ12//ZMYND8//SPDEF//HDAC8//EHMT1//GSC//RPL28//SMG5//DCP1A//UPF3B//DCP1B//CNOT4//DDX23//SF3B1//DBR1//HNRNPM//CDC5L//CSTF3//HNRNPA2B1//HNRNPD//HNRNPR//PAPOLA//SF3B2//RALY//ISY1//NCOA1//TOP2B//ERCC5//RFC1//POLD3//…
GO:0051726	regulation of cell cycle	Biological process	36	697	459	14742	1.65887	0.00204094	0.164123	2.69017	BUB1B//CDC6//MCM3//PSMD2//RFC2//RPA1//CDC45//CHEK2//ANAPC5//MCM8//GTPBP4//BCCIP//MUC1//EIF4G2//PRKAB2//PRKAG1//MAP2K6//KHDRBS1//BUB1//KNTC1//BRCC3//SMC3//TIMELESS//SMARCA4//BMP7//HDAC1//PPP1R13B//AURKA//ESPL1//FOXC1//CDK5RAP2//TOP2B//MDM4//AURKB//E2F2//OVOL2
GO:0045892	negative regulation of transcription, DNA-dependent	Biological process	37	723	459	14742	1.64364	0.00208055	0.164209	2.68182	DDX5//DNMT3A//BPTF//HDAC1//MDM4//SALL2//SMARCA4//SOX3//ZNF189//NRIP1//FZD8//AURKB//TXNIP//SPEN//HEY2//SUZ12//ZMYND8//SPDEF//HDAC8//EHMT1//GSC//MUC1//OVOL2//MAF1//BCL3//BMP7//GCLC//NRG1//ATP8B1//XRCC5//TIMELESS//LRRFIP1//BCLAF1//YAF2//RAMP3//KHDRBS1//TH1L
GO:0010629	negative regulation of gene expression	Biological process	40	802	459	14742	1.60188	0.00221143	0.171366	2.65533	DDX5//DNMT3A//BPTF//HDAC1//MDM4//SALL2//SMARCA4//SOX3//ZNF189//NRIP1//FZD8//AURKB//TXNIP//SPEN//HEY2//SUZ12//ZMYND8//SPDEF//HDAC8//EHMT1//GSC//MUC1//OVOL2//CELF1//MAF1//BCL3//BMP7//GCLC//NRG1//ATP8B1//XRCC5//TIMELESS//LRRFIP1//BCLAF1//YAF2//RAMP3//KHDRBS1//TH1L//ZCCHC11//PGR
GO:0010564	regulation of cell cycle process	Biological process	24	409	459	14742	1.88465	0.00228373	0.171497	2.64136	BUB1B//CDC6//MCM3//PSMD2//RFC2//RPA1//CDC45//CHEK2//ANAPC5//MCM8//MUC1//BUB1//KNTC1//BRCC3//SMC3//TIMELESS//SMARCA4//BMP7//AURKA//ESPL1//CDK5RAP2//TOP2B//MDM4//AURKB
GO:0072001	renal system development	Biological process	14	188	459	14742	2.39174	0.00229361	0.171497	2.63948	BMP7//FOXC1//APH1A//ALDH9A1//CA2//HMGCS2//KCNJ8//SERPINF1//SIX1//TINAG//AHI1//DLL1//RET//FOXD4
GO:0006297	nucleotide-excision repair, DNA gap filling	Biological process	4	19	459	14742	6.76161	0.00247836	0.179932	2.60584	RFC1//RFC2//RPA1//POLD3
GO:0006206	pyrimidine base metabolic process	Biological process	5	31	459	14742	5.18027	0.00249085	0.179932	2.60365	UMPS//DPYD//DPYSL5//MAPK1//UCK1
GO:0080090	regulation of primary metabolic process	Biological process	158	4197	459	14742	1.2091	0.00275891	0.195974	2.55926	MLH1//CDC6//GTPBP4//BCCIP//CDC45//DDX5//DNMT3A//BPTF//HDAC1//MDM4//SALL2//SMARCA4//SOX3//ZNF189//NRIP1//FZD8//AURKB//TXNIP//SPEN//HEY2//SUZ12//ZMYND8//SPDEF//HDAC8//EHMT1//GSC//MAP3K5//MAPK1//KIDINS220//GRM4//PIK3CB//MAP2K6//DUSP2//NCOA1//PPP1R3C//PRKAG1//SMC3//CDC5L//CREBL2//E2F2//FOXC1//FOXD4//HIF1A//HNRNPD//FOXK2//MYCL1//NHLH2//NONO//CNOT4//PDE8A//RFC1//SIX1//TADA2A//THRSP//TTF1//WHSC1//XBP1//…
GO:0007052	mitotic spindle organization	Biological process	5	32	459	14742	5.01838	0.0028778	0.201069	2.54094	PRC1//AURKB//CHEK2//SMC3//DCTN2
GO:0010662	regulation of striated muscle cell apoptosis	Biological process	3	10	459	14742	9.63529	0.00305603	0.210077	2.51484	BMP7//NRG1//HEY2
GO:0034641	cellular nitrogen compound metabolic process	Biological process	196	5381	459	14742	1.16987	0.0031635	0.213723	2.49983	MLH1//CDC6//MCM3//NASP//RFC2//RPA1//RRM1//CDC45//POLQ//MCM8//SLC25A10//GCLC//MTHFD1//DDX5//DNMT3A//BPTF//HDAC1//MDM4//SALL2//SMARCA4//SOX3//ZNF189//NRIP1//FZD8//AURKB//TXNIP//SPEN//HEY2//SUZ12//ZMYND8//SPDEF//HDAC8//EHMT1//GSC//RPL28//SMG5//DCP1A//UPF3B//DCP1B//CNOT4//DDX23//SF3B1//DBR1//HNRNPM//CDC5L//CSTF3//HNRNPA2B1//HNRNPD//HNRNPR//PAPOLA//SF3B2//RALY//ISY1//NCOA1//TOP2B//ERCC5//RFC1//POLD3//…
GO:0071453	cellular response to oxygen levels	Biological process	6	47	459	14742	4.10013	0.00320936	0.213723	2.49358	BMP7//HIF1A//MDM4//PMAIP1//VLDLR//STC2
GO:0007059	chromosome segregation	Biological process	11	135	459	14742	2.61699	0.00331083	0.217089	2.48006	ESPL1//MLH1//TOP2B//SMC3//BUB1//NCAPD2//NCAPH//NCAPG//AURKB//CDC6//CDK5RAP2
GO:0051253	negative regulation of RNA metabolic process	Biological process	37	748	459	14742	1.58871	0.00367344	0.237215	2.43493	DDX5//DNMT3A//BPTF//HDAC1//MDM4//SALL2//SMARCA4//SOX3//ZNF189//NRIP1//FZD8//AURKB//TXNIP//SPEN//HEY2//SUZ12//ZMYND8//SPDEF//HDAC8//EHMT1//GSC//MUC1//OVOL2//MAF1//BCL3//BMP7//GCLC//NRG1//ATP8B1//XRCC5//TIMELESS//LRRFIP1//BCLAF1//YAF2//RAMP3//KHDRBS1//TH1L
GO:0071702	organic substance transport	Biological process	27	499	459	14742	1.73783	0.00388323	0.247019	2.41081	SEPT2//SLC6A6//SLC25A10//SLC16A7//PRKAB2//C11ORF2//VLDLR//OSBPL9//SLC2A10//SLC37A3//NUP133//NUP85//AKR1C4//AKR1C1//ATP8B1//FOLR1//SLC19A2//GOT2//PLIN2//PITPNA//CREBL2//ERBB3//PIK3R1//VPS4B//SOAT1//FZD4//XBP1
GO:0008354	germ cell migration	Biological process	3	11	459	14742	8.75936	0.0041056	0.248857	2.38662	CXADR//FOXC1//PPAP2A
GO:0010658	striated muscle cell apoptosis	Biological process	3	11	459	14742	8.75936	0.0041056	0.248857	2.38662	BMP7//NRG1//HEY2
GO:0045746	negative regulation of Notch signaling pathway	Biological process	3	11	459	14742	8.75936	0.0041056	0.248857	2.38662	BMP7//HEY2//OVOL2
GO:0007050	cell cycle arrest	Biological process	22	382	459	14742	1.84971	0.00426961	0.248857	2.36961	BUB1B//CDC6//MCM3//PSMD2//RFC2//RPA1//CDC45//CHEK2//ANAPC5//MCM8//MUC1//BUB1//KNTC1//BRCC3//TOP2B//MDM4//EIF4G2//PRKAB2//PRKAG1//MAP2K6//KHDRBS1
GO:0071156	regulation of cell cycle arrest	Biological process	17	267	459	14742	2.04494	0.0042886	0.248857	2.36768	BUB1B//CDC6//MCM3//PSMD2//RFC2//RPA1//CDC45//CHEK2//ANAPC5//MCM8//MUC1//BUB1//KNTC1//BRCC3//TOP2B//MDM4//CDK5RAP2
GO:0060255	regulation of macromolecule metabolic process	Biological process	150	3998	459	14742	1.20501	0.00430697	0.248857	2.36583	MLH1//CDC6//GTPBP4//BCCIP//CDC45//DDX5//DNMT3A//BPTF//HDAC1//MDM4//SALL2//SMARCA4//SOX3//ZNF189//NRIP1//FZD8//AURKB//TXNIP//SPEN//HEY2//SUZ12//ZMYND8//SPDEF//HDAC8//EHMT1//GSC//MAP3K5//MAPK1//KIDINS220//GRM4//PIK3CB//MAP2K6//DUSP2//NCOA1//RAMP3//AHI1//PPP1R3C//PRKAG1//SMC3//GNAS//CDC5L//CREBL2//E2F2//FOXC1//FOXD4//HIF1A//HNRNPD//FOXK2//MYCL1//NHLH2//NONO//CNOT4//PDE8A//RFC1//SIX1//TADA2A//THRSP//…
GO:0000075	cell cycle checkpoint	Biological process	16	245	459	14742	2.09748	0.00432084	0.248857	2.36443	CDC6//CDC45//CHEK2//MUC1//PSMD2//BUB1//BUB1B//KNTC1//ANAPC5//BRCC3//TOP2B//CDK5RAP2//MCM3//RFC2//RPA1//MCM8
GO:0001822	kidney development	Biological process	13	181	459	14742	2.30679	0.0044117	0.250702	2.35539	BMP7//FOXC1//APH1A//AHI1//DLL1//SIX1//RET//FOXD4//ALDH9A1//CA2//HMGCS2//KCNJ8//SERPINF1
GO:0033554	cellular response to stress	Biological process	49	1075	459	14742	1.46397	0.00453993	0.254595	2.34295	CHEK2//ERCC5//RPA1//POLD3//FANCA//NONO//RFC1//RFC2//XRCC5//USP10//SMC3//PARP2//POLQ//FANCI//BCCIP//MLH1//BRCC3//BCL3//PMAIP1//MAPK1//PARG//TIMELESS//MAP2K6//MUC1//PSMD2//XBP1//PDIA5//KLHDC3//MAP3K5//CTSL2//AKR1C3//EIF2AK1//KIAA1324//VAPB//ADM//CTNNA1//EIF2B5//MYOF//SCARA5//OS9//VLDLR//DDX5//CD44//HIF1A//BCLAF1//NET1//BMP7//MDM4//STC2
GO:0051320	S phase	Biological process	11	141	459	14742	2.50563	0.00461138	0.255243	2.33617	CDC6//MCM3//PSMD2//RFC1//RFC2//RPA1//CDC45//POLD3//MCM8//TIMELESS//SMARCA4
GO:0014032	neural crest cell development	Biological process	6	52	459	14742	3.70588	0.00534218	0.291902	2.27228	FOXD4//HIF1A//RET//OVOL2//FOXC1//NRG1
GO:0008156	negative regulation of DNA replication	Biological process	5	37	459	14742	4.34022	0.00548549	0.295939	2.26078	SMC3//CDC6//TTF1//PDS5A//GTPBP4
GO:0032201	telomere maintenance via semi-conservative replication	Biological process	4	24	459	14742	5.35294	0.00600931	0.320146	2.22118	RFC1//RFC2//RPA1//POLD3
GO:0009790	embryo development	Biological process	38	799	459	14742	1.5275	0.00618735	0.325561	2.2085	ADAM10//FOXC1//RPA1//ALS2//DUSP2//BMP7//DLL1//NASP//NCAPG2//SMARCB1//RET//OVOL2//ADM//HIF1A//ZIC3//AHI1//GSC//TINAG//SALL2//CYP26B1//CD44//GNAS//SH2B3//PIK3CB//SIX1//HDAC1//LMBR1//DNMT3A//MAPK1//BUB1//FOXD4//NRG1//FOXK2//NOTCH4//FZD4//FZD8//CELF1//EHMT1
GO:0007076	mitotic chromosome condensation	Biological process	3	13	459	14742	7.41176	0.00679423	0.344726	2.16786	NCAPD2//NCAPH//NCAPG
GO:0010656	negative regulation of muscle cell apoptosis	Biological process	3	13	459	14742	7.41176	0.00679423	0.344726	2.16786	BMP7//NRG1//HEY2
GO:0042448	progesterone metabolic process	Biological process	3	13	459	14742	7.41176	0.00679423	0.344726	2.16786	ADM//AKR1C1//AKR1C3
GO:0051983	regulation of chromosome segregation	Biological process	4	25	459	14742	5.13882	0.00698099	0.348737	2.15608	BUB1//ESPL1//CDC6//AURKB
GO:0051053	negative regulation of DNA metabolic process	Biological process	6	55	459	14742	3.50374	0.00703693	0.348737	2.15262	MLH1//CDC6//TTF1//PDS5A//GTPBP4//SMC3
GO:0034754	cellular hormone metabolic process	Biological process	8	91	459	14742	2.82353	0.00739983	0.362507	2.13078	AKR1C3//ADM//AKR1C4//SULT1A1//ATP1A1//CYP26B1//AKR1C1//SCPEP1
GO:0006259	DNA metabolic process	Biological process	39	836	459	14742	1.49831	0.00760086	0.368123	2.11914	MLH1//CDC6//MCM3//NASP//RFC2//RPA1//RRM1//CDC45//POLQ//MCM8//TOP2B//ERCC5//RFC1//POLD3//XRCC5//H2AFY//SMC3//FANCA//NONO//USP10//PARP2//FANCI//BCCIP//CHEK2//BRCC3//DNMT3A//GNAS//EHMT1//AIFM1//NCAPD2//NCAPH//NCAPG//KLHDC3//TTF1//PDS5A//GTPBP4//SMARCB1//NCAPG2//PARG
GO:0042476	odontogenesis	Biological process	8	92	459	14742	2.79284	0.00789078	0.377871	2.10288	ADM//BMP7//CA2//CTNNA1//EDA//FOXC1//HDAC1//ERBB3
GO:0000084	S phase of mitotic cell cycle	Biological process	10	132	459	14742	2.43316	0.00825682	0.391006	2.08319	SMARCA4//CDC6//MCM3//PSMD2//RFC1//RFC2//RPA1//CDC45//POLD3//MCM8
GO:0006260	DNA replication	Biological process	16	264	459	14742	1.94652	0.00868483	0.406756	2.06124	RFC1//RPA1//TOP2B//POLD3//MCM3//CDC45//RFC2//MCM8//SMC3//CDC6//TTF1//PDS5A//GTPBP4//NASP//RRM1//POLQ
GO:0000722	telomere maintenance via recombination	Biological process	4	27	459	14742	4.75817	0.00922325	0.427277	2.03512	RFC1//RFC2//RPA1//POLD3
GO:2001022	positive regulation of response to DNA damage stimulus	Biological process	5	42	459	14742	3.82353	0.00943211	0.427924	2.02539	DDX5//PMAIP1//PARG//BRCC3//BCLAF1
GO:0065007	biological regulation	Biological process	286	8387	459	14742	1.09522	0.00953126	0.427924	2.02085	MLH1//BUB1B//CDC6//MCM3//PSMD2//RFC2//RPA1//CDC45//CHEK2//ANAPC5//MCM8//GTPBP4//BCCIP//DDX5//DNMT3A//BPTF//HDAC1//MDM4//SALL2//SMARCA4//SOX3//ZNF189//NRIP1//FZD8//AURKB//TXNIP//SPEN//HEY2//SUZ12//ZMYND8//SPDEF//HDAC8//EHMT1//GSC//MAP3K5//MAPK1//MAPK6//RET//BRAP//KIDINS220//GRM4//PIK3CB//MAP2K6//DUSP2//NCOA1//RFC1//POLD3//XRCC5//ALDH9A1//KCNMB4//NET1//SIX1//PMAIP1//FAM109B//GNAS//RAMP3//HIF1A//PAL…
GO:0030521	androgen receptor signaling pathway	Biological process	6	59	459	14742	3.2662	0.00986068	0.427924	2.00609	DDX5//HDAC1//SMARCA4//NRIP1//PPAP2A//NCOA1
GO:0015718	monocarboxylic acid transport	Biological process	7	77	459	14742	2.91979	0.00999756	0.427924	2.00011	SLC16A7//PRKAB2//AKR1C4//AKR1C1//ATP8B1//GOT2//PLIN2
GO:0033036	macromolecule localization	Biological process	69	1683	459	14742	1.31677	0.0100134	0.427924	1.99942	BCL3//AKR1C3//MAPK1//PMAIP1//TMSB15A//TXNIP//AGFG1//SMG5//NUP133//UPF3B//TRAK1//HSPA9//AHCYL1//RPL28//OS9//PRKAB2//C11ORF2//VLDLR//OSBPL9//AP2A2//CSE1L//RAMP3//COG2//ARFGAP3//SYTL2//MLPH//SYTL4//AURKB//GNAS//LMF1//HEY2//SOAT1//NASP//RAB7A//RABEP1//VPS4B//KIF20A//SEC61A1//NMD3//EXOC1//SNX14//SNX22//NUP85//ATG16L2//GOT2//PLIN2//PITPNA//NRIP1//AKR1C1//SEPT2//PICALM//TBC1D1//AHI1//USP4//BUB1B//BMP7//…
GO:0010608	posttranscriptional regulation of gene expression	Biological process	18	316	459	14742	1.82949	0.0102839	0.427924	1.98784	EIF2B5//EIF2B1//EIF4G2//EIF2AK1//BCL3//MAPK1//PASK//UPF3B//CELF1//CREBL2//MDM4//GTPBP4//CAPRIN1//ZCCHC11//AURKA//USP4//RBM24//HNRNPD
GO:0043620	regulation of DNA-dependent transcription in response to stress	Biological process	3	15	459	14742	6.42353	0.0103213	0.427924	1.98627	MUC1//HIF1A//BCLAF1
GO:0046885	regulation of hormone biosynthetic process	Biological process	3	15	459	14742	6.42353	0.0103213	0.427924	1.98627	HIF1A//ATP1A1//AKR1C3
GO:0051923	sulfation	Biological process	3	15	459	14742	6.42353	0.0103213	0.427924	1.98627	HS3ST5//SULT1A1//SULT1C4
GO:0005975	carbohydrate metabolic process	Biological process	33	694	459	14742	1.52721	0.0104136	0.427924	1.9824	CHST1//PPP1R3C//C10ORF125//SLC25A10//GOT2//PKM2//SPATA20//GDPD1//DHTKD1//PGD//PRKAG1//FUT4//COG2//UGGT2//TRAK1//PGLYRP1//GLA//PMAIP1//MUC1//GALNT4//MUCL1//MAN1A1//FOXC1//CD44//LMF1//PASK//HIF1A//UGT2B15//MANBA//PARG//NUP133//NUP85//ATHL1
GO:0046854	phosphatidylinositol phosphorylation	Biological process	4	28	459	14742	4.58824	0.0105012	0.427924	1.97876	PIK3CB//PIK3R1//PI4KB//IP6K2
GO:0060038	cardiac muscle cell proliferation	Biological process	4	28	459	14742	4.58824	0.0105012	0.427924	1.97876	CXADR//NRG1//HEY2//FOXC1
GO:0014033	neural crest cell differentiation	Biological process	6	60	459	14742	3.21176	0.0106766	0.427924	1.97157	FOXD4//HIF1A//RET//OVOL2//FOXC1//NRG1
GO:0046942	carboxylic acid transport	Biological process	12	180	459	14742	2.14118	0.0107687	0.427924	1.96784	SEPT2//SLC6A6//SLC25A10//SLC16A7//PRKAB2//AKR1C4//AKR1C1//ATP8B1//FOLR1//SLC19A2//GOT2//PLIN2
GO:0006766	vitamin metabolic process	Biological process	9	117	459	14742	2.47059	0.0108437	0.427924	1.96482	AKR1C3//MTHFD1//SHMT1//SLC19A2//GCLC//CYP26B1//SCPEP1//AKR1C1//FOLR1
GO:0006898	receptor-mediated endocytosis	Biological process	9	117	459	14742	2.47059	0.0108437	0.427924	1.96482	ADM//AHI1//PICALM//RAMP3//MAPK1//PIK3CB//FOLR1//PI4KB//VLDLR
GO:0006397	mRNA processing	Biological process	21	391	459	14742	1.72499	0.0110446	0.431855	1.95685	MLH1//CNOT4//DDX23//HNRNPM//DDX5//CDC5L//CSTF3//HNRNPA2B1//HNRNPD//HNRNPR//PAPOLA//SF3B2//RALY//SF3B1//DBR1//ISY1//UPF3B//CELF1//AHCYL1//NONO//KHDRBS1
GO:0044249	cellular biosynthetic process	Biological process	171	4746	459	14742	1.15721	0.0111539	0.432161	1.95258	CDC6//MCM3//NASP//RFC2//RPA1//RRM1//CDC45//POLQ//MCM8//MTHFD1//DDX5//DNMT3A//BPTF//HDAC1//MDM4//SALL2//SMARCA4//SOX3//ZNF189//NRIP1//FZD8//AURKB//TXNIP//SPEN//HEY2//SUZ12//ZMYND8//SPDEF//HDAC8//EHMT1//GSC//NCOA1//POLD3//ALDH9A1//AKR1C3//TTF1//CSTF3//TADA2A//XBP1//PAPOLA//TH1L//UPF3B//PPP1R3C//SLC25A10//GOT2//ADM//GNAS//AMPD3//UMPS//CTPS//DPYD//RFC1//TOP2B//SMC3//BCL3//CREBL2//SIX1//PELP1//BAZ2B//…
GO:0006283	transcription-coupled nucleotide-excision repair	Biological process	5	44	459	14742	3.64973	0.0114487	0.43959	1.94124	ERCC5//RFC1//RFC2//RPA1//POLD3
GO:0015849	organic acid transport	Biological process	12	182	459	14742	2.11765	0.0116859	0.443562	1.93234	SEPT2//SLC6A6//SLC25A10//SLC16A7//PRKAB2//AKR1C4//AKR1C1//ATP8B1//FOLR1//SLC19A2//GOT2//PLIN2
GO:0014855	striated muscle cell proliferation	Biological process	4	29	459	14742	4.43002	0.0118883	0.443562	1.92488	FOXC1//CXADR//NRG1//HEY2
GO:0046834	lipid phosphorylation	Biological process	4	29	459	14742	4.43002	0.0118883	0.443562	1.92488	PIK3CB//PIK3R1//PI4KB//IP6K2
GO:0042698	ovulation cycle	Biological process	8	99	459	14742	2.59537	0.0120407	0.443562	1.91935	CTNNA1//FOXC1//EIF2B5//PGR//NRIP1//FZD4//NCOA1//NHLH2
GO:0009987	cellular process	Biological process	409	12597	459	14742	1.0428	0.0120726	0.443562	1.9182	RCL1//GTPBP4//GNL2//MLH1//PRC1//BCL3//AKR1C3//CDC6//MCM3//NASP//RFC2//RPA1//RRM1//CDC45//POLQ//MCM8//ESPL1//CDK5RAP2//BUB1B//PSMD2//CHEK2//ANAPC5//BCCIP//E2F2//RHOU//RFC1//POLD3//CKAP5//DCTN2//KHDRBS1//BUB1//CENPC1//SMC3//AURKB//KNTC1//KIF20A//NUP133//CENPM//NUP85//SLC25A10//GCLC//MTHFD1//DDX5//DNMT3A//BPTF//HDAC1//MDM4//SALL2//SMARCA4//SOX3//ZNF189//NRIP1//FZD8//TXNIP//SPEN//HEY2//SUZ12//ZMYND8/…
GO:0006725	cellular aromatic compound metabolic process	Biological process	14	228	459	14742	1.97214	0.0122242	0.445296	1.91278	AMPD3//NT5C2//DPYD//UMPS//UCK1//DPYSL5//SULT1A1//SHMT1//MTHFD1//MAPK1//SLC19A2//DNMT3A//EIF2AK1//FOLR1
GO:0045132	meiotic chromosome segregation	Biological process	3	16	459	14742	6.02206	0.0124139	0.446061	1.90609	MLH1//TOP2B//ESPL1
GO:0050789	regulation of biological process	Biological process	271	7933	459	14742	1.09717	0.0124954	0.446061	1.90325	MLH1//BUB1B//CDC6//MCM3//PSMD2//RFC2//RPA1//CDC45//CHEK2//ANAPC5//MCM8//GTPBP4//BCCIP//DDX5//DNMT3A//BPTF//HDAC1//MDM4//SALL2//SMARCA4//SOX3//ZNF189//NRIP1//FZD8//AURKB//TXNIP//SPEN//HEY2//SUZ12//ZMYND8//SPDEF//HDAC8//EHMT1//GSC//MAP3K5//MAPK1//MAPK6//RET//BRAP//KIDINS220//GRM4//PIK3CB//MAP2K6//DUSP2//NCOA1//NET1//SIX1//PMAIP1//FAM109B//RAMP3//HIF1A//PALM3//ADM//ATP1A1//SEPT2//AHI1//CLEC7A//HCK//…
GO:0045727	positive regulation of translation	Biological process	5	45	459	14742	3.56863	0.0125592	0.446061	1.90104	EIF2B5//BCL3//MAPK1//PASK//UPF3B
GO:0030258	lipid modification	Biological process	10	141	459	14742	2.27785	0.0127911	0.448825	1.89309	SLC27A2//PCCB//SOAT1//PRKAB2//PRKAG1//PPAP2A//PIK3CB//PIK3R1//PI4KB//IP6K2
GO:0006974	response to DNA damage stimulus	Biological process	28	574	459	14742	1.56671	0.0128476	0.448825	1.89118	CHEK2//ERCC5//RPA1//POLD3//FANCA//NONO//RFC1//RFC2//XRCC5//USP10//SMC3//PARP2//POLQ//FANCI//BCCIP//MLH1//BRCC3//MAP2K6//MUC1//PSMD2//BCL3//DDX5//PMAIP1//CD44//PARG//BCLAF1//MAPK1//TIMELESS
GO:0007399	nervous system development	Biological process	65	1590	459	14742	1.31299	0.0131209	0.454643	1.88204	DCDC2//OVOL2//ADM//CTNNA1//ERBB3//S100A6//PICALM//FZD8//AFG3L2//ALS2//AP2A2//ALCAM//BMP7//COL9A3//HSP90AB1//LAMC1//PITPNA//MAPK1//RYK//EVL//DPYSL5//PCDHB6//NHLH2//SOX3//AHI1//CKB//BPTF//FOXC1//HMGCS2//FZD4//RAB3GAP1//CDK5RAP2//FOXD4//RET//EIF2B5//EIF2B1//EFNB3//HIF1A//VLDLR//NCOA1//CTSL2//GSC//SALL2//GPC2//GNAO1//SEPT2//ZIC3//NTF4//HEY2//DLL1//SIX1//DSCAM//SERPINF1//XRCC5//SPEN//TIAM1//CAPRIN1//C…
GO:0030261	chromosome condensation	Biological process	4	30	459	14742	4.28235	0.0133875	0.460142	1.8733	NCAPD2//NCAPH//NCAPG//NCAPG2
GO:0001655	urogenital system development	Biological process	14	231	459	14742	1.94652	0.0135787	0.460809	1.86714	BMP7//FOXC1//APH1A//ALDH9A1//CA2//HMGCS2//KCNJ8//SERPINF1//SIX1//TINAG//AHI1//DLL1//RET//FOXD4
GO:0051325	interphase	Biological process	21	399	459	14742	1.6904	0.0136232	0.460809	1.86572	CDC6//CDC45//E2F2//MCM3//PSMD2//RPA1//RHOU//MCM8//RFC1//RFC2//POLD3//CKAP5//DCTN2//KHDRBS1//CHEK2//ANAPC5//CDK5RAP2//TIMELESS//SMARCA4//TOP2B
GO:0060485	mesenchyme development	Biological process	10	143	459	14742	2.24599	0.0140133	0.470272	1.85346	FOXD4//HIF1A//RET//OVOL2//BMP7//ERBB3//HEY2//FOXC1//NRG1//SIX1
GO:0031326	regulation of cellular biosynthetic process	Biological process	122	3279	459	14742	1.19498	0.0147066	0.482966	1.83249	CDC6//CDC45//DDX5//DNMT3A//BPTF//HDAC1//MDM4//SALL2//SMARCA4//SOX3//ZNF189//NRIP1//FZD8//AURKB//TXNIP//SPEN//HEY2//SUZ12//ZMYND8//SPDEF//HDAC8//EHMT1//GSC//NCOA1//PPP1R3C//SMC3//CDC5L//CREBL2//E2F2//FOXC1//FOXD4//HIF1A//HNRNPD//FOXK2//MYCL1//NHLH2//NONO//CNOT4//PDE8A//MAP2K6//RFC1//SIX1//TADA2A//THRSP//TTF1//WHSC1//XBP1//ZNF75A//ZNF230//CSDE1//PIAS3//ZNF274//ZNF275//ASCC3//CHEK2//ELL2//ZNF544//GR…
GO:0006378	mRNA polyadenylation	Biological process	3	17	459	14742	5.66782	0.0147315	0.482966	1.83175	CSTF3//AHCYL1//PAPOLA
GO:0043586	tongue development	Biological process	3	17	459	14742	5.66782	0.0147315	0.482966	1.83175	CYP26B1//HDAC1//ERBB3
GO:0006776	vitamin A metabolic process	Biological process	4	31	459	14742	4.14421	0.0150018	0.484378	1.82386	AKR1C3//CYP26B1//SCPEP1//AKR1C1
GO:0055017	cardiac muscle tissue growth	Biological process	4	31	459	14742	4.14421	0.0150018	0.484378	1.82386	FOXC1//CXADR//NRG1//HEY2
GO:0006869	lipid transport	Biological process	12	189	459	14742	2.03922	0.015376	0.489048	1.81316	PRKAB2//GOT2//PLIN2//PITPNA//AKR1C1//VPS4B//SOAT1//FZD4//ATP8B1//C11ORF2//VLDLR//OSBPL9
GO:0008406	gonad development	Biological process	12	189	459	14742	2.03922	0.015376	0.489048	1.81316	CTNNA1//FOXC1//EIF2B5//PGR//NRIP1//FANCA//CSDE1//AKR1C3//FZD4//CTSL2//SOX3//FZD8
GO:0050794	regulation of cellular process	Biological process	257	7509	459	14742	1.09925	0.0155451	0.490763	1.80841	MLH1//BUB1B//CDC6//MCM3//PSMD2//RFC2//RPA1//CDC45//CHEK2//ANAPC5//MCM8//GTPBP4//BCCIP//DDX5//DNMT3A//BPTF//HDAC1//MDM4//SALL2//SMARCA4//SOX3//ZNF189//NRIP1//FZD8//AURKB//TXNIP//SPEN//HEY2//SUZ12//ZMYND8//SPDEF//HDAC8//EHMT1//GSC//MAP3K5//MAPK1//MAPK6//RET//BRAP//KIDINS220//GRM4//PIK3CB//MAP2K6//DUSP2//NCOA1//NET1//PMAIP1//RAMP3//HIF1A//PALM3//ADM//AHI1//CLEC7A//HCK//E2F2//OVOL2//TMSB15A//RYK//FZD…
GO:0007091	mitotic metaphase/anaphase transition	Biological process	5	48	459	14742	3.34559	0.016322	0.511503	1.78723	BUB1//BUB1B//ANAPC5//ESPL1//SMC3
GO:0051147	regulation of muscle cell differentiation	Biological process	7	85	459	14742	2.64498	0.0166318	0.517407	1.77906	RBM24//CTNNA1//MAP2K6//NRG1//HEY2//DDX5//CYP26B1
GO:0009220	pyrimidine ribonucleotide biosynthetic process	Biological process	3	18	459	14742	5.35294	0.0172767	0.523167	1.76254	DPYD//UMPS//CTPS
GO:0015721	bile acid and bile salt transport	Biological process	3	18	459	14742	5.35294	0.0172767	0.523167	1.76254	AKR1C4//AKR1C1//ATP8B1
GO:0060765	regulation of androgen receptor signaling pathway	Biological process	3	18	459	14742	5.35294	0.0172767	0.523167	1.76254	HDAC1//SMARCA4//DDX5
GO:0010876	lipid localization	Biological process	13	215	459	14742	1.942	0.017308	0.523167	1.76175	PRKAB2//C11ORF2//VLDLR//OSBPL9//SOAT1//GOT2//PLIN2//PITPNA//NRIP1//AKR1C1//VPS4B//FZD4//ATP8B1
GO:0048608	reproductive structure development	Biological process	14	239	459	14742	1.88137	0.0177604	0.533061	1.75055	CTNNA1//FOXC1//EIF2B5//PGR//NRIP1//FZD8//FANCA//CSDE1//AKR1C3//FZD4//CTSL2//SOX3//BMP7//SERPINF1
GO:0009058	biosynthetic process	Biological process	172	4839	459	14742	1.14161	0.018434	0.54675	1.73438	CDC6//MCM3//NASP//RFC2//RPA1//RRM1//CDC45//POLQ//MCM8//MTHFD1//DDX5//DNMT3A//BPTF//HDAC1//MDM4//SALL2//SMARCA4//SOX3//ZNF189//NRIP1//FZD8//AURKB//TXNIP//SPEN//HEY2//SUZ12//ZMYND8//SPDEF//HDAC8//EHMT1//GSC//NCOA1//POLD3//ALDH9A1//AKR1C3//TTF1//CSTF3//TADA2A//XBP1//PAPOLA//TH1L//UPF3B//PPP1R3C//SLC25A10//GOT2//ADM//GNAS//AMPD3//UMPS//CTPS//DPYD//RFC1//TOP2B//SMC3//BCL3//CREBL2//SIX1//PELP1//BAZ2B//…
GO:0009889	regulation of biosynthetic process	Biological process	122	3307	459	14742	1.18487	0.0189287	0.54675	1.72288	CDC6//CDC45//DDX5//DNMT3A//BPTF//HDAC1//MDM4//SALL2//SMARCA4//SOX3//ZNF189//NRIP1//FZD8//AURKB//TXNIP//SPEN//HEY2//SUZ12//ZMYND8//SPDEF//HDAC8//EHMT1//GSC//NCOA1//PPP1R3C//SMC3//CDC5L//CREBL2//E2F2//FOXC1//FOXD4//HIF1A//HNRNPD//FOXK2//MYCL1//NHLH2//NONO//CNOT4//PDE8A//MAP2K6//RFC1//SIX1//TADA2A//THRSP//TTF1//WHSC1//XBP1//ZNF75A//ZNF230//CSDE1//PIAS3//ZNF274//ZNF275//ASCC3//CHEK2//ELL2//ZNF544//GR…
GO:0072527	pyrimidine-containing compound metabolic process	Biological process	6	68	459	14742	2.83391	0.0189929	0.54675	1.72141	DPYD//UMPS//UCK1//DPYSL5//CTPS//MAPK1
GO:0051276	chromosome organization	Biological process	31	673	459	14742	1.47942	0.0192037	0.54675	1.71661	ESPL1//RFC1//RFC2//RPA1//POLD3//XRCC5//TOP2B//HDAC8//H2AFY//NASP//SMARCA4//SMARCB1//BPTF//HDAC1//TTF1//DNMT3A//SMC3//BUB1//NCAPD2//NCAPH//NCAPG//CTR9//LEO1//WHSC1//SUZ12//BRCC3//EHMT1//AURKB//NCAPG2//TADA2A//MUC1
GO:2000112	regulation of cellular macromolecule biosynthetic process	Biological process	113	3039	459	14742	1.19424	0.0195726	0.54675	1.70835	CDC6//CDC45//DDX5//DNMT3A//BPTF//HDAC1//MDM4//SALL2//SMARCA4//SOX3//ZNF189//NRIP1//FZD8//AURKB//TXNIP//SPEN//HEY2//SUZ12//ZMYND8//SPDEF//HDAC8//EHMT1//GSC//NCOA1//PPP1R3C//SMC3//CDC5L//CREBL2//E2F2//FOXC1//FOXD4//HIF1A//HNRNPD//FOXK2//MYCL1//NHLH2//NONO//CNOT4//PDE8A//MAP2K6//RFC1//SIX1//TADA2A//THRSP//TTF1//WHSC1//XBP1//ZNF75A//ZNF230//CSDE1//PIAS3//ZNF274//ZNF275//ASCC3//CHEK2//ELL2//ZNF544//GR…
GO:0007088	regulation of mitosis	Biological process	7	88	459	14742	2.55481	0.019776	0.54675	1.70386	BUB1//BUB1B//ANAPC5//BMP7//AURKA//ESPL1//CDC6
GO:0031123	RNA 3'-end processing	Biological process	7	88	459	14742	2.55481	0.019776	0.54675	1.70386	MLH1//CNOT4//CSTF3//AHCYL1//PAPOLA//UPF3B//ZCCHC11
GO:0051783	regulation of nuclear division	Biological process	7	88	459	14742	2.55481	0.019776	0.54675	1.70386	BUB1//BUB1B//ANAPC5//BMP7//AURKA//ESPL1//CDC6
GO:0006508	proteolysis	Biological process	40	919	459	14742	1.39794	0.0199619	0.54675	1.6998	TRIP12//OS9//ADAM10//APH1A//UBE2G2//USP4//USP10//FBXO21//ANAPC5//PMAIP1//SERPINA3//SERPINF1//SERPINB6//BUB1B//PSMD2//AURKA//AURKB//HSP90AB1//GCLC//RET//CFB//BLMH//CTSL2//MMP11//PRCP//SPG7//UQCRC1//ESPL1//CAPN9//AFG3L2//ADAM30//PRSS23//TINAG//C1RL//KLK15//TASP1//SCPEP1//BRCC3//DPP9//ADAMTS19
GO:0009218	pyrimidine ribonucleotide metabolic process	Biological process	3	19	459	14742	5.07121	0.0200514	0.54675	1.69786	DPYD//UMPS//CTPS
GO:0042573	retinoic acid metabolic process	Biological process	3	19	459	14742	5.07121	0.0200514	0.54675	1.69786	AKR1C3//CYP26B1//SCPEP1
GO:0043921	modulation by host of viral transcription	Biological process	3	19	459	14742	5.07121	0.0200514	0.54675	1.69786	HDAC1//SMARCA4//SMARCB1
GO:0045823	positive regulation of heart contraction	Biological process	3	19	459	14742	5.07121	0.0200514	0.54675	1.69786	ADM//HEY2//ATP1A1
GO:0052472	modulation by host of symbiont transcription	Biological process	3	19	459	14742	5.07121	0.0200514	0.54675	1.69786	HDAC1//SMARCA4//SMARCB1
GO:0034109	homotypic cell-cell adhesion	Biological process	4	34	459	14742	3.77855	0.0205602	0.54675	1.68697	BMP7//CD44//PIK3CB//CXADR
GO:0043331	response to dsRNA	Biological process	4	34	459	14742	3.77855	0.0205602	0.54675	1.68697	ZCCHC11//KCNJ8//MAPK1//PMAIP1
GO:0061326	renal tubule development	Biological process	4	34	459	14742	3.77855	0.0205602	0.54675	1.68697	TINAG//AHI1//DLL1//SIX1
GO:0042445	hormone metabolic process	Biological process	10	152	459	14742	2.113	0.0206178	0.54675	1.68576	AKR1C3//ADM//AKR1C4//SULT1A1//HIF1A//ATP1A1//CYP26B1//AKR1C1//SCPEP1//ALDH9A1
GO:0000819	sister chromatid segregation	Biological process	5	51	459	14742	3.14879	0.020768	0.54675	1.6826	ESPL1//NCAPD2//NCAPH//NCAPG//TOP2B
GO:0051329	interphase of mitotic cell cycle	Biological process	20	391	459	14742	1.64285	0.0208201	0.54675	1.68152	CDC6//CDC45//E2F2//MCM3//PSMD2//RPA1//RHOU//MCM8//RFC1//RFC2//POLD3//CKAP5//DCTN2//KHDRBS1//CHEK2//ANAPC5//CDK5RAP2//SMARCA4//TOP2B
GO:0008585	female gonad development	Biological process	7	89	459	14742	2.52611	0.0209104	0.54675	1.67964	CTNNA1//FOXC1//EIF2B5//PGR//NRIP1//FZD4//FANCA
GO:0034645	cellular macromolecule biosynthetic process	Biological process	139	3839	459	14742	1.16289	0.021373	0.555128	1.67013	CDC6//MCM3//NASP//RFC2//RPA1//RRM1//CDC45//POLQ//MCM8//DDX5//DNMT3A//BPTF//HDAC1//MDM4//SALL2//SMARCA4//SOX3//ZNF189//NRIP1//FZD8//AURKB//TXNIP//SPEN//HEY2//SUZ12//ZMYND8//SPDEF//HDAC8//EHMT1//GSC//NCOA1//POLD3//TTF1//CSTF3//TADA2A//XBP1//PAPOLA//TH1L//UPF3B//PPP1R3C//RFC1//TOP2B//SMC3//BCL3//CREBL2//SIX1//PELP1//BAZ2B//SPOCD1//CDC5L//E2F2//FOXC1//FOXD4//HIF1A//HNRNPD//FOXK2//MYCL1//NHLH2//NONO//…
GO:0019318	hexose metabolic process	Biological process	14	245	459	14742	1.83529	0.0214913	0.555128	1.66774	PPP1R3C//C10ORF125//SLC25A10//GOT2//PKM2//CHST1//SPATA20//DHTKD1//PGD//PRKAG1//PMAIP1//FUT4//PASK//HIF1A
GO:0008380	RNA splicing	Biological process	17	318	459	14742	1.71698	0.0217506	0.558439	1.66253	DDX23//SF3B1//DBR1//HNRNPM//DDX5//CDC5L//CSTF3//HNRNPA2B1//HNRNPD//HNRNPR//PAPOLA//SF3B2//RALY//ISY1//UPF3B//CELF1//NONO
GO:0010468	regulation of gene expression	Biological process	118	3208	459	14742	1.18138	0.0229667	0.571318	1.6389	CDC6//CDC45//DDX5//DNMT3A//BPTF//HDAC1//MDM4//SALL2//SMARCA4//SOX3//ZNF189//NRIP1//FZD8//AURKB//TXNIP//SPEN//HEY2//SUZ12//ZMYND8//SPDEF//HDAC8//EHMT1//GSC//NCOA1//GNAS//CDC5L//CREBL2//E2F2//FOXC1//FOXD4//HIF1A//HNRNPD//FOXK2//MYCL1//NHLH2//NONO//CNOT4//PDE8A//MAP2K6//RFC1//SIX1//TADA2A//THRSP//TTF1//WHSC1//XBP1//ZNF75A//ZNF230//CSDE1//PIAS3//ZNF274//ZNF275//ASCC3//CHEK2//ELL2//ZNF544//GRHL1//BAZ2…
GO:0010660	regulation of muscle cell apoptosis	Biological process	3	20	459	14742	4.81765	0.0230565	0.571318	1.63721	BMP7//NRG1//HEY2
GO:0043631	RNA polyadenylation	Biological process	3	20	459	14742	4.81765	0.0230565	0.571318	1.63721	CSTF3//AHCYL1//PAPOLA
GO:0045022	early endosome to late endosome transport	Biological process	3	20	459	14742	4.81765	0.0230565	0.571318	1.63721	VPS4B//MAPK1//RAB7A
GO:0052312	modulation of transcription in other organism involved in symbiotic interaction	Biological process	3	20	459	14742	4.81765	0.0230565	0.571318	1.63721	HDAC1//SMARCA4//SMARCB1
GO:0061333	renal tubule morphogenesis	Biological process	3	20	459	14742	4.81765	0.0230565	0.571318	1.63721	TINAG//AHI1//SIX1
GO:0022602	ovulation cycle process	Biological process	7	91	459	14742	2.47059	0.0233134	0.574346	1.63239	CTNNA1//FOXC1//EIF2B5//PGR//NRIP1//FZD4//NCOA1
GO:0009057	macromolecule catabolic process	Biological process	35	794	459	14742	1.41577	0.0241298	0.585704	1.61745	RPL28//SMG5//DCP1A//UPF3B//DCP1B//TRIP12//OS9//CNOT4//MLH1//ERCC5//RPA1//PPP1R3C//AIFM1//HNRNPD//UBE2G2//USP4//USP10//FBXO21//ANAPC5//RAB7A//PGLYRP1//PMAIP1//ZCCHC11//SPG7//AFG3L2//CD44//BUB1B//PSMD2//AURKA//AURKB//HSP90AB1//GCLC//CHEK2//MDM4//APH1A
GO:0035050	embryonic heart tube development	Biological process	5	53	459	14742	3.02997	0.0241319	0.585704	1.61741	HIF1A//ZIC3//AHI1//OVOL2//FOXC1
GO:0016052	carbohydrate catabolic process	Biological process	10	156	459	14742	2.05882	0.0241867	0.585704	1.61642	PPP1R3C//PKM2//DHTKD1//PGD//PRKAG1//PGLYRP1//GLA//CD44//FUT4//HIF1A
GO:2001020	regulation of response to DNA damage stimulus	Biological process	6	72	459	14742	2.67647	0.0244668	0.588623	1.61142	DDX5//PMAIP1//CD44//PARG//BRCC3//BCLAF1
GO:0042594	response to starvation	Biological process	7	92	459	14742	2.44373	0.0245835	0.588623	1.60936	CTSL2//AKR1C3//KIAA1324//PMAIP1//VLDLR//ADM//HMGCS2
GO:0014031	mesenchymal cell development	Biological process	8	113	459	14742	2.27382	0.0248205	0.588659	1.60519	FOXD4//HIF1A//RET//OVOL2//BMP7//HEY2//FOXC1//NRG1
GO:0000122	negative regulation of transcription from RNA polymerase II promoter	Biological process	21	424	459	14742	1.59073	0.0248612	0.588659	1.60448	HEY2//DDX5//DNMT3A//BPTF//HDAC1//MDM4//SALL2//SMARCA4//SOX3//ZNF189//NRIP1//FZD8//AURKB//TXNIP//SPEN//SUZ12//ZMYND8//SPDEF//HDAC8//EHMT1//GSC
GO:0043112	receptor metabolic process	Biological process	7	93	459	14742	2.41746	0.0259003	0.609004	1.5867	FAM109B//RAMP3//ADM//AHI1//HDAC1//HIF1A//PICALM
GO:0009725	response to hormone stimulus	Biological process	31	690	459	14742	1.44297	0.0260332	0.609004	1.58447	PIK3CB//PIK3R1//PRKAB2//PRKAG1//MAPK1//AURKA//NCOA1//TXNIP//ADM//ERBB3//HIF1A//HMGCS2//VLDLR//AKAP1//AKR1C3//CTSL2//BMP7//PGR//EIF2B1//STC2//EIF2B5//CA2//CTNNA1//IL4R//CA4//SERPINF1//GNAS//AKR1C4//AKR1C1//GCLC//PIAS3
GO:0032350	regulation of hormone metabolic process	Biological process	3	21	459	14742	4.58824	0.026292	0.609004	1.58018	HIF1A//ATP1A1//AKR1C3
GO:0060043	regulation of cardiac muscle cell proliferation	Biological process	3	21	459	14742	4.58824	0.026292	0.609004	1.58018	CXADR//NRG1//HEY2
GO:0001523	retinoid metabolic process	Biological process	4	37	459	14742	3.47218	0.0272337	0.615521	1.56489	AKR1C3//CYP26B1//SCPEP1//AKR1C1
GO:0001709	cell fate determination	Biological process	4	37	459	14742	3.47218	0.0272337	0.615521	1.56489	NTF4//NOTCH4//DLL1//CYP26B1
GO:0060419	heart growth	Biological process	4	37	459	14742	3.47218	0.0272337	0.615521	1.56489	FOXC1//CXADR//NRG1//HEY2
GO:0072528	pyrimidine-containing compound biosynthetic process	Biological process	4	37	459	14742	3.47218	0.0272337	0.615521	1.56489	UMPS//CTPS//DPYD//UCK1
GO:0042770	signal transduction in response to DNA damage	Biological process	9	137	459	14742	2.10992	0.0275047	0.615521	1.56059	MUC1//PSMD2//MLH1//CHEK2//BCL3//USP10//DDX5//PMAIP1//CD44
GO:0031124	mRNA 3'-end processing	Biological process	6	74	459	14742	2.60413	0.0275621	0.615521	1.55969	MLH1//CNOT4//CSTF3//AHCYL1//PAPOLA//UPF3B
GO:0044262	cellular carbohydrate metabolic process	Biological process	25	533	459	14742	1.50646	0.0275844	0.615521	1.55934	PPP1R3C//C10ORF125//SLC25A10//GOT2//PKM2//CHST1//SPATA20//GDPD1//DHTKD1//PGD//PRKAG1//FUT4//COG2//UGGT2//TRAK1//PMAIP1//GLA//MUC1//GALNT4//MUCL1//MAN1A1//LMF1//PASK//HIF1A//UGT2B15
GO:0006790	sulfur compound metabolic process	Biological process	10	160	459	14742	2.00735	0.028181	0.620073	1.55004	SLC25A10//GCLC//HS3ST5//GSS//MTHFD1//CHST1//SLC19A2//DNMT3A//SULT1A1//SULT1C4
GO:0008652	cellular amino acid biosynthetic process	Biological process	7	95	459	14742	2.36656	0.0286767	0.620073	1.54247	MTHFD1//GOT2//GAMT//GCLC//GSS//SHMT1//ALDH9A1
GO:0030522	intracellular receptor mediated signaling pathway	Biological process	12	207	459	14742	1.86189	0.0288762	0.620073	1.53946	PPAP2A//NRIP1//NCOA1//DDX5//HSP90AB1//MAP2K6//TXNIP//AKR1C3//CYP26B1//PGR//HDAC1//SMARCA4
GO:0009056	catabolic process	Biological process	73	1890	459	14742	1.24052	0.0289674	0.620073	1.53809	SLC25A10//RPL28//SMG5//DCP1A//UPF3B//DCP1B//TRIP12//OS9//CNOT4//MLH1//ERCC5//RPA1//SLC27A2//PPP1R3C//PKM2//DHTKD1//PGD//PRKAG1//DPYD//GNAO1//GNAS//RAB7A//GNA14//GTPBP4//GNL2//NT5C2//AMPD3//ATP1A1//ATP8B1//VPS4B//DPYSL5//AIFM1//HNRNPD//UBE2G2//USP4//USP10//FBXO21//ANAPC5//GOT2//SHMT1//PCCB//SMPDL3B//ATG16L2//PGLYRP1//PMAIP1//PIK3CB//ZCCHC11//AZGP1//PLCB4//GLA//KIAA1324//AKR1C3//SPG7//AFG3L2//CD44/…
GO:0001755	neural crest cell migration	Biological process	4	38	459	14742	3.3808	0.0297131	0.620073	1.52705	FOXD4//HIF1A//RET//OVOL2
GO:0006144	purine base metabolic process	Biological process	4	38	459	14742	3.3808	0.0297131	0.620073	1.52705	DPYD//SHMT1//AMPD3//NT5C2
GO:0045930	negative regulation of mitotic cell cycle	Biological process	4	38	459	14742	3.3808	0.0297131	0.620073	1.52705	CDC6//CDC45//SMARCA4//FOXC1
GO:0006760	folic acid-containing compound metabolic process	Biological process	3	22	459	14742	4.37968	0.0297574	0.620073	1.52641	MTHFD1//FOLR1//SHMT1
GO:0007032	endosome organization	Biological process	3	22	459	14742	4.37968	0.0297574	0.620073	1.52641	VPS4B//ALS2//FAM109B
GO:0007140	male meiosis	Biological process	3	22	459	14742	4.37968	0.0297574	0.620073	1.52641	MLH1//FANCA//CYP26B1
GO:0010657	muscle cell apoptosis	Biological process	3	22	459	14742	4.37968	0.0297574	0.620073	1.52641	BMP7//NRG1//HEY2
GO:0030728	ovulation	Biological process	3	22	459	14742	4.37968	0.0297574	0.620073	1.52641	PGR//NRIP1//IL4R
GO:0043516	regulation of DNA damage response, signal transduction by p53 class mediator	Biological process	3	22	459	14742	4.37968	0.0297574	0.620073	1.52641	DDX5//PMAIP1//CD44
GO:0031669	cellular response to nutrient levels	Biological process	9	139	459	14742	2.07956	0.0298252	0.620073	1.52542	NCOA1//CTSL2//AKR1C3//KIAA1324//PMAIP1//VLDLR//RET//FZD4//CYP26B1
GO:0006730	one-carbon metabolic process	Biological process	11	185	459	14742	1.9097	0.0302829	0.623743	1.5188	DNMT3A//GNAS//EHMT1//SUZ12//NSUN2//GAMT//CA2//CA4//MTHFD1//SHMT1//AHCYL1
GO:0016070	RNA metabolic process	Biological process	132	3668	459	14742	1.15581	0.0302944	0.623743	1.51864	CDC6//CDC45//DDX5//DNMT3A//BPTF//HDAC1//MDM4//SALL2//SMARCA4//SOX3//ZNF189//NRIP1//FZD8//AURKB//TXNIP//SPEN//HEY2//SUZ12//ZMYND8//SPDEF//HDAC8//EHMT1//GSC//RPL28//SMG5//DCP1A//UPF3B//DCP1B//CNOT4//MLH1//DDX23//SF3B1//DBR1//HNRNPM//CDC5L//CSTF3//HNRNPA2B1//HNRNPD//HNRNPR//PAPOLA//SF3B2//RALY//ISY1//NCOA1//TTF1//TADA2A//XBP1//TH1L//BCL3//CREBL2//SIX1//PELP1//BAZ2B//SPOCD1//E2F2//FOXC1//FOXD4//HIF1A…
GO:0045137	development of primary sexual characteristics	Biological process	12	209	459	14742	1.84408	0.0307831	0.630239	1.51169	CTNNA1//FOXC1//EIF2B5//PGR//NRIP1//FZD8//FANCA//CSDE1//AKR1C3//FZD4//CTSL2//SOX3
GO:0061039	ovum-producing ovary development	Biological process	6	76	459	14742	2.5356	0.0309057	0.630239	1.50996	CTNNA1//FOXC1//EIF2B5//PGR//NRIP1//FZD4
GO:0006897	endocytosis	Biological process	17	333	459	14742	1.63964	0.031952	0.634818	1.4955	ADM//AHI1//FOLR1//PI4KB//VLDLR//PICALM//CLEC7A//RAMP3//PACSIN1//HCK//MAPK1//PIK3CB//AP2A2//RAB7A//RABEP1//ARC//SCARA5
GO:0010324	membrane invagination	Biological process	17	333	459	14742	1.63964	0.031952	0.634818	1.4955	ADM//AHI1//AP2A2//PIK3CB//RAB7A//RABEP1//ARC//PACSIN1//SCARA5//FOLR1//PI4KB//VLDLR//PICALM//CLEC7A//RAMP3//HCK//MAPK1
GO:0008207	C21-steroid hormone metabolic process	Biological process	4	39	459	14742	3.29412	0.0323218	0.634818	1.4905	ADM//ATP1A1//AKR1C1//AKR1C3
GO:0010833	telomere maintenance via telomere lengthening	Biological process	4	39	459	14742	3.29412	0.0323218	0.634818	1.4905	RFC1//RFC2//RPA1//POLD3
GO:0016101	diterpenoid metabolic process	Biological process	4	39	459	14742	3.29412	0.0323218	0.634818	1.4905	AKR1C3//CYP26B1//SCPEP1//AKR1C1
GO:0045839	negative regulation of mitosis	Biological process	4	39	459	14742	3.29412	0.0323218	0.634818	1.4905	BUB1//BUB1B//ANAPC5//BMP7
GO:0051225	spindle assembly	Biological process	4	39	459	14742	3.29412	0.0323218	0.634818	1.4905	AURKB//MLH1//CHEK2//HAUS4
GO:0051784	negative regulation of nuclear division	Biological process	4	39	459	14742	3.29412	0.0323218	0.634818	1.4905	BUB1//BUB1B//ANAPC5//BMP7
GO:0010556	regulation of macromolecule biosynthetic process	Biological process	113	3099	459	14742	1.17112	0.0329196	0.636805	1.48255	CDC6//CDC45//DDX5//DNMT3A//BPTF//HDAC1//MDM4//SALL2//SMARCA4//SOX3//ZNF189//NRIP1//FZD8//AURKB//TXNIP//SPEN//HEY2//SUZ12//ZMYND8//SPDEF//HDAC8//EHMT1//GSC//NCOA1//PPP1R3C//SMC3//CDC5L//CREBL2//E2F2//FOXC1//FOXD4//HIF1A//HNRNPD//FOXK2//MYCL1//NHLH2//NONO//CNOT4//PDE8A//MAP2K6//RFC1//SIX1//TADA2A//THRSP//TTF1//WHSC1//XBP1//ZNF75A//ZNF230//CSDE1//PIAS3//ZNF274//ZNF275//ASCC3//CHEK2//ELL2//ZNF544//GR…
GO:0030518	intracellular steroid hormone receptor signaling pathway	Biological process	7	98	459	14742	2.29412	0.0332079	0.636805	1.47876	NRIP1//PPAP2A//NCOA1//DDX5//PGR//HDAC1//SMARCA4
GO:0009595	detection of biotic stimulus	Biological process	3	23	459	14742	4.18926	0.0334512	0.636805	1.47559	CLEC7A//PARG//PGLYRP1
GO:0048846	axon extension involved in axon guidance	Biological process	3	23	459	14742	4.18926	0.0334512	0.636805	1.47559	DSCAM//RYK//FOXD4
GO:0055021	regulation of cardiac muscle tissue growth	Biological process	3	23	459	14742	4.18926	0.0334512	0.636805	1.47559	CXADR//NRG1//HEY2
GO:0060571	morphogenesis of an epithelial fold	Biological process	3	23	459	14742	4.18926	0.0334512	0.636805	1.47559	OVOL2//HIF1A//BMP7
GO:0048511	rhythmic process	Biological process	11	188	459	14742	1.87922	0.0334863	0.636805	1.47513	CTNNA1//FOXC1//EIF2B5//PGR//NRIP1//ERBB3//TIMELESS//NHLH2//FZD4//PGLYRP1//NCOA1
GO:0051171	regulation of nitrogen compound metabolic process	Biological process	123	3406	459	14742	1.15986	0.0336317	0.636805	1.47325	MLH1//CDC6//CDC45//DDX5//DNMT3A//BPTF//HDAC1//MDM4//SALL2//SMARCA4//SOX3//ZNF189//NRIP1//FZD8//AURKB//TXNIP//SPEN//HEY2//SUZ12//ZMYND8//SPDEF//HDAC8//EHMT1//GSC//NCOA1//SMC3//CDC5L//CREBL2//E2F2//FOXC1//FOXD4//HIF1A//HNRNPD//FOXK2//MYCL1//NHLH2//NONO//CNOT4//PDE8A//MAP2K6//RFC1//SIX1//TADA2A//THRSP//TTF1//WHSC1//XBP1//ZNF75A//ZNF230//CSDE1//PIAS3//ZNF274//ZNF275//ASCC3//CHEK2//ELL2//ZNF544//GRHL1…
GO:0000902	cell morphogenesis	Biological process	36	843	459	14742	1.37157	0.0337677	0.636805	1.4715	BMP7//HIF1A//NOTCH4//HEY2//ERBB3//S100A6//PICALM//FZD8//AFG3L2//ALS2//AP2A2//ALCAM//COL9A3//HSP90AB1//LAMC1//PITPNA//MAPK1//RYK//EVL//DPYSL5//HCK//FAM40B//RHOU//FOXC1//EFNB3//CAPZB//ARC//CAMSAP1//ADM//CTNNA1//FZD4//AHI1//DSCAM//FOXD4//TIAM1//CAPRIN1
GO:0019216	regulation of lipid metabolic process	Biological process	11	189	459	14742	1.86928	0.0346055	0.637093	1.46085	THRSP//CREBL2//ATP1A1//PRKAB2//PIK3R1//PRKAG1//LMF1//PPP2R5A//AKR1C3//SERPINA3//PPAP2A
GO:0046545	development of primary female sexual characteristics	Biological process	7	99	459	14742	2.27094	0.0348185	0.637093	1.45819	CTNNA1//FOXC1//EIF2B5//PGR//NRIP1//FANCA//FZD4
GO:0001947	heart looping	Biological process	4	40	459	14742	3.21176	0.0350604	0.637093	1.45518	HIF1A//ZIC3//AHI1//OVOL2
GO:0005996	monosaccharide metabolic process	Biological process	15	287	459	14742	1.67862	0.0354633	0.637093	1.45022	PPP1R3C//C10ORF125//SLC25A10//GOT2//PKM2//CHST1//SPATA20//DHTKD1//PGD//PRKAG1//PMAIP1//FUT4//PASK//HIF1A//UGT2B15
GO:0065009	regulation of molecular function	Biological process	70	1823	459	14742	1.23326	0.0359843	0.637093	1.44389	CDC6//GTPBP4//BCCIP//MAP3K5//MAPK1//KIDINS220//GRM4//PIK3CB//MAP2K6//DUSP2//PKIB//PMAIP1//AIFM1//XBP1//PDIA5//KLHDC3//NRG1//ADORA3//GNAS//CHRM1//PPAP2A//CSTA//FARP1//SYTL2//SPOCD1//SERPINA3//SERPINF1//SERPINB6//BMP7//ZCCHC11//EFCAB4B//AGFG1//ARFGAP3//NET1//AHCYL1//RAB3GAP1//ALS2//RFC1//SAE1//APH1A//CAND1//CD44//NGFRAP1//GNAO1//PIK3R1//PRKAG1//VLDLR//HIF1A//TIAM1//BRCC3//GLA//LMF1//FOXC1//FOXD4//H…
GO:0007009	plasma membrane organization	Biological process	5	59	459	14742	2.72183	0.0362497	0.637093	1.4407	SYT7//MYOF//RAMP3//PIK3R1//PPP2R5A
GO:0000216	M/G1 transition of mitotic cell cycle	Biological process	6	79	459	14742	2.43931	0.0364	0.637093	1.4389	CDC6//MCM3//PSMD2//RPA1//CDC45//MCM8
GO:0019219	regulation of nucleobase-containing compound metabolic process	Biological process	120	3325	459	14742	1.15913	0.0365616	0.637093	1.43698	MLH1//CDC6//CDC45//DDX5//DNMT3A//BPTF//HDAC1//MDM4//SALL2//SMARCA4//SOX3//ZNF189//NRIP1//FZD8//AURKB//TXNIP//SPEN//HEY2//SUZ12//ZMYND8//SPDEF//HDAC8//EHMT1//GSC//NCOA1//SMC3//CDC5L//CREBL2//E2F2//FOXC1//FOXD4//HIF1A//HNRNPD//FOXK2//MYCL1//NHLH2//NONO//CNOT4//PDE8A//MAP2K6//RFC1//SIX1//TADA2A//THRSP//TTF1//WHSC1//XBP1//ZNF75A//ZNF230//CSDE1//PIAS3//ZNF274//ZNF275//ASCC3//CHEK2//ELL2//ZNF544//GRHL1…
GO:0010033	response to organic substance	Biological process	63	1620	459	14742	1.24902	0.0367151	0.637093	1.43516	PALM3//CLEC7A//TOR1A//HSP90AB1//XBP1//PDIA5//KLHDC3//PIK3CB//PIK3R1//PRKAB2//PRKAG1//MAPK1//GCLC//VLDLR//PIAS3//CTSL2//EIF2B1//HIF1A//EIF2B5//TXNIP//GNAO1//PLIN2//CTNNA1//CD44//EIF4G2//HCK//JAK1//IP6K2//NUP133//NUP85//DNMT3A//HMGCS2//FZD4//MYOF//VAPB//ZCCHC11//AURKA//NCOA1//ADM//KCNJ8//ERBB3//AKAP1//VPS4B//SEC61A1//ADAM10//GSS//AKR1C3//IL4R//UQCRC1//PMAIP1//BMP7//PGR//STC2//CA2//GOT2//CA4//SERPIN…
GO:0006600	creatine metabolic process	Biological process	2	10	459	14742	6.42353	0.0368903	0.637093	1.43309	GAMT//CKB
GO:0007063	regulation of sister chromatid cohesion	Biological process	2	10	459	14742	6.42353	0.0368903	0.637093	1.43309	ESPL1//BUB1
GO:0009886	post-embryonic morphogenesis	Biological process	2	10	459	14742	6.42353	0.0368903	0.637093	1.43309	GNAS//DSCAM
GO:0010659	cardiac muscle cell apoptosis	Biological process	2	10	459	14742	6.42353	0.0368903	0.637093	1.43309	NRG1//HEY2
GO:0043517	positive regulation of DNA damage response, signal transduction by p53 class mediator	Biological process	2	10	459	14742	6.42353	0.0368903	0.637093	1.43309	DDX5//PMAIP1
GO:0043618	regulation of transcription from RNA polymerase II promoter in response to stress	Biological process	2	10	459	14742	6.42353	0.0368903	0.637093	1.43309	MUC1//HIF1A
GO:0043923	positive regulation by host of viral transcription	Biological process	2	10	459	14742	6.42353	0.0368903	0.637093	1.43309	SMARCA4//SMARCB1
GO:0045064	T-helper 2 cell differentiation	Biological process	2	10	459	14742	6.42353	0.0368903	0.637093	1.43309	IL4R//BCL3
GO:0046902	regulation of mitochondrial membrane permeability	Biological process	2	10	459	14742	6.42353	0.0368903	0.637093	1.43309	PMAIP1//PPIF
GO:0060766	negative regulation of androgen receptor signaling pathway	Biological process	2	10	459	14742	6.42353	0.0368903	0.637093	1.43309	HDAC1//SMARCA4
GO:0090192	regulation of glomerulus development	Biological process	2	10	459	14742	6.42353	0.0368903	0.637093	1.43309	BMP7//RET
GO:0044281	small molecule metabolic process	Biological process	94	2539	459	14742	1.18907	0.0369221	0.637093	1.43271	SLC25A10//GCLC//MTHFD1//SLC27A2//AKR1C3//PPP1R3C//C10ORF125//GOT2//PKM2//CHST1//SPATA20//GDPD1//HIF1A//DHTKD1//PGD//PRKAG1//AMPD3//NT5C2//DPYD//ADM//GNAS//GNAO1//RAB7A//GNA14//GTPBP4//GNL2//ATP1A1//MLH1//ATP8B1//VPS4B//UMPS//UCK1//DPYSL5//CTPS//DNMT3A//EHMT1//QARS//HARS2//IARS2//GSS//SLC6A6//PSMD2//SHMT1//SULT1A1//CKB//GAMT//PCCB//PDIA5//TXNDC5//HMGCS2//AKR1C4//CA2//CA4//AHCYL1//ATP2C2//SLC19A2//…
GO:0007212	dopamine receptor signaling pathway	Biological process	3	24	459	14742	4.01471	0.0373715	0.637109	1.42746	GNAS//GNA14//GNAO1
GO:0008593	regulation of Notch signaling pathway	Biological process	3	24	459	14742	4.01471	0.0373715	0.637109	1.42746	BMP7//HEY2//OVOL2
GO:0030947	regulation of vascular endothelial growth factor receptor signaling pathway	Biological process	3	24	459	14742	4.01471	0.0373715	0.637109	1.42746	HIF1A//FZD4//MYOF
GO:0042981	regulation of apoptotic process	Biological process	47	1161	459	14742	1.3002	0.0378966	0.640836	1.4214	PMAIP1//AURKB//FOXC1//GCLC//HDAC1//NRG1//HSPA9//MUC1//TXNDC5//MAPK1//BCLAF1//PPP1R13B//MAP3K5//TIAM1//NET1//NGFRAP1//APH1A//OBSCN//MLH1//CHEK2//SPDEF//BMP7//HEY2//BCL3//MAP2K6//TXNIP//IP6K2//CD44//CTNNA1//ERCC5//HCK//MDM4//CXCL12//XRCC5//AHI1//ERBB3//SIX1//GRM4//ADM//DDX5//AKR1C3//HIF1A//DUSP2//LCN2//PSMD2//PPIF//KIAA1324
GO:0031577	spindle checkpoint	Biological process	4	41	459	14742	3.13343	0.0379294	0.640836	1.42102	BUB1//BUB1B//ANAPC5//CDK5RAP2
GO:0009059	macromolecule biosynthetic process	Biological process	139	3913	459	14742	1.1409	0.0380412	0.640836	1.41975	CDC6//MCM3//NASP//RFC2//RPA1//RRM1//CDC45//POLQ//MCM8//DDX5//DNMT3A//BPTF//HDAC1//MDM4//SALL2//SMARCA4//SOX3//ZNF189//NRIP1//FZD8//AURKB//TXNIP//SPEN//HEY2//SUZ12//ZMYND8//SPDEF//HDAC8//EHMT1//GSC//NCOA1//POLD3//TTF1//CSTF3//TADA2A//XBP1//PAPOLA//TH1L//UPF3B//PPP1R3C//RFC1//TOP2B//SMC3//BCL3//CREBL2//SIX1//PELP1//BAZ2B//SPOCD1//CDC5L//E2F2//FOXC1//FOXD4//HIF1A//HNRNPD//FOXK2//MYCL1//NHLH2//NONO//…
GO:0048762	mesenchymal cell differentiation	Biological process	8	123	459	14742	2.08895	0.0383745	0.643905	1.41596	FOXD4//HIF1A//RET//OVOL2//BMP7//HEY2//FOXC1//NRG1
GO:0048699	generation of neurons	Biological process	40	964	459	14742	1.33268	0.0385468	0.64426	1.41401	DCDC2//CTNNA1//ERBB3//S100A6//PICALM//FZD8//AFG3L2//ALS2//AP2A2//ALCAM//BMP7//COL9A3//HSP90AB1//LAMC1//PITPNA//MAPK1//RYK//EVL//DPYSL5//RET//EFNB3//FZD4//GPC2//ADM//GNAO1//SEPT2//AHI1//NTF4//HEY2//DLL1//SIX1//CDK5RAP2//SOX3//DSCAM//FOXD4//SERPINF1//XRCC5//SPEN//TIAM1//CAPRIN1
GO:0010467	gene expression	Biological process	145	4101	459	14742	1.13559	0.0388156	0.644441	1.41099	CDC6//CDC45//DDX5//DNMT3A//BPTF//HDAC1//MDM4//SALL2//SMARCA4//SOX3//ZNF189//NRIP1//FZD8//AURKB//TXNIP//SPEN//HEY2//SUZ12//ZMYND8//SPDEF//HDAC8//EHMT1//GSC//MLH1//CNOT4//DDX23//SF3B1//DBR1//HNRNPM//CDC5L//CSTF3//HNRNPA2B1//HNRNPD//HNRNPR//PAPOLA//SF3B2//RALY//ISY1//UPF3B//NCOA1//TTF1//TADA2A//XBP1//TH1L//GNAS//BCL3//CREBL2//SIX1//PELP1//BAZ2B//SPOCD1//E2F2//FOXC1//FOXD4//HIF1A//FOXK2//MYCL1//NHLH2…
GO:0022008	neurogenesis	Biological process	42	1021	459	14742	1.3212	0.03886	0.644441	1.4105	DCDC2//CTNNA1//ERBB3//S100A6//PICALM//FZD8//AFG3L2//ALS2//AP2A2//ALCAM//BMP7//COL9A3//HSP90AB1//LAMC1//PITPNA//MAPK1//RYK//EVL//DPYSL5//RET//EIF2B5//EIF2B1//EFNB3//FZD4//GPC2//ADM//GNAO1//SEPT2//AHI1//NTF4//HEY2//DLL1//SIX1//CDK5RAP2//SOX3//DSCAM//FOXD4//SERPINF1//XRCC5//SPEN//TIAM1//CAPRIN1
GO:0000086	G2/M transition of mitotic cell cycle	Biological process	9	146	459	14742	1.97985	0.039019	0.64457	1.40872	CDC6//CDC45//TOP2B//CKAP5//DCTN2//KHDRBS1//CHEK2//ANAPC5//CDK5RAP2
GO:0000904	cell morphogenesis involved in differentiation	Biological process	28	634	459	14742	1.41844	0.0400176	0.656754	1.39775	BMP7//HIF1A//NOTCH4//HEY2//ERBB3//S100A6//PICALM//FZD8//AFG3L2//ALS2//AP2A2//ALCAM//COL9A3//HSP90AB1//LAMC1//PITPNA//MAPK1//RYK//EVL//DPYSL5//FOXC1//EFNB3//CTNNA1//FZD4//DSCAM//FOXD4//TIAM1//CAPRIN1
GO:0003143	embryonic heart tube morphogenesis	Biological process	4	42	459	14742	3.05882	0.0409291	0.656754	1.38797	HIF1A//ZIC3//AHI1//OVOL2
GO:0008206	bile acid metabolic process	Biological process	4	42	459	14742	3.05882	0.0409291	0.656754	1.38797	AKR1C4//SLC27A2//AKR1C1//ATP8B1
GO:0030071	regulation of mitotic metaphase/anaphase transition	Biological process	4	42	459	14742	3.05882	0.0409291	0.656754	1.38797	BUB1//BUB1B//ANAPC5//ESPL1
GO:0035272	exocrine system development	Biological process	4	42	459	14742	3.05882	0.0409291	0.656754	1.38797	XBP1//FOXC1//BMP7//EDA
GO:0061371	determination of heart left/right asymmetry	Biological process	4	42	459	14742	3.05882	0.0409291	0.656754	1.38797	HIF1A//ZIC3//AHI1//OVOL2
GO:0006767	water-soluble vitamin metabolic process	Biological process	5	61	459	14742	2.63259	0.0409884	0.656754	1.38734	GCLC//SLC19A2//FOLR1//MTHFD1//SHMT1
GO:0019538	protein metabolic process	Biological process	127	3554	459	14742	1.1477	0.0409894	0.656754	1.38733	CDC6//GTPBP4//BCCIP//MAP3K5//MAPK1//KIDINS220//GRM4//PIK3CB//MAP2K6//DUSP2//BLMH//PSMD2//TRIP12//OS9//FZD8//TOR1A//HSPA9//HSP90AB1//DNAJC7//PPIF//PDIA5//UGGT2//DNAJC22//CFB//BRAP//SAE1//FBXO21//ANAPC5//DCAF6//CAND1//EIF2B1//EIF4G2//RPL28//EIF2B5//HARS2//EIF3L//QARS//IARS2//CHRM1//MANBA//PLOD2//ADAM10//BUB1//BUB1B//HCK//JAK1//PRKAG1//MAPK6//RET//AURKA//STK38L//PASK//PACSIN1//PKIB//TPTE//MTMR4//GNA…
GO:0008202	steroid metabolic process	Biological process	14	268	459	14742	1.67779	0.0413674	0.657768	1.38334	HMGCS2//AKR1C4//SLC27A2//ADM//SOAT1//VLDLR//AKR1C1//ATP8B1//SULT1A1//ATP1A1//AKR1C3//LMF1//UGT2B15//UGT2B17
GO:0006221	pyrimidine nucleotide biosynthetic process	Biological process	3	25	459	14742	3.85412	0.0415156	0.657768	1.38179	DPYD//UMPS//CTPS
GO:0046326	positive regulation of glucose import	Biological process	3	25	459	14742	3.85412	0.0415156	0.657768	1.38179	CREBL2//ERBB3//PIK3R1
GO:0001890	placenta development	Biological process	7	103	459	14742	2.18275	0.0417754	0.658312	1.37908	HIF1A//CTSL2//STC2//ADM//MAPK1//OVOL2//HSP90AB1
GO:0006366	transcription from RNA polymerase II promoter	Biological process	49	1227	459	14742	1.28261	0.0421651	0.658312	1.37505	CDC6//CDC45//DDX5//DNMT3A//BPTF//HDAC1//MDM4//SALL2//SMARCA4//SOX3//ZNF189//NRIP1//FZD8//AURKB//TXNIP//SPEN//HEY2//SUZ12//ZMYND8//SPDEF//HDAC8//EHMT1//GSC//NCOA1//CSTF3//PAPOLA//UPF3B//FOXK2//SMARCB1//LRRFIP1//TRAK1//ELP2//E2F2//ELL2//TH1L//MUC1//HIF1A//BCL3//BMP7//FOXC1//FOXD4//NHLH2//SIX1//ZIC3//SKAP1//AHI1//DCAF6//TADA2A//XBP1
GO:0043067	regulation of programmed cell death	Biological process	47	1170	459	14742	1.2902	0.0423354	0.658312	1.3733	PMAIP1//AURKB//FOXC1//GCLC//HDAC1//NRG1//HSPA9//MUC1//TXNDC5//MAPK1//BCLAF1//PPP1R13B//MAP3K5//TIAM1//NET1//NGFRAP1//APH1A//OBSCN//MLH1//CHEK2//SPDEF//BMP7//HEY2//BCL3//DUSP2//LCN2//PSMD2//PPIF//KIAA1324//MAP2K6//TXNIP//IP6K2//CD44//CTNNA1//ERCC5//HCK//MDM4//CXCL12//XRCC5//AHI1//ERBB3//SIX1//GRM4//ADM//DDX5//AKR1C3//HIF1A
GO:0032446	protein modification by small protein conjugation	Biological process	20	423	459	14742	1.51856	0.0424058	0.658312	1.37258	BLMH//PSMD2//TRIP12//OS9//BRAP//SAE1//FBXO21//ANAPC5//DCAF6//CAND1//CTR9//LEO1//SUZ12//PIAS3//GCLC//USP4//GTPBP4//BUB1B//CNOT4//UBE2G2
GO:0016071	mRNA metabolic process	Biological process	27	611	459	14742	1.41927	0.0429316	0.658312	1.36722	RPL28//SMG5//DCP1A//UPF3B//DCP1B//CNOT4//MLH1//DDX23//HNRNPM//DDX5//CDC5L//CSTF3//HNRNPA2B1//HNRNPD//HNRNPR//PAPOLA//SF3B2//RALY//SF3B1//DBR1//ISY1//CELF1//AHCYL1//NONO//KHDRBS1//RBM24//PSMD2
GO:0016567	protein ubiquitination	Biological process	19	398	459	14742	1.53325	0.04346	0.658312	1.36191	BLMH//PSMD2//TRIP12//OS9//CTR9//LEO1//SUZ12//GCLC//USP4//GTPBP4//BUB1B//ANAPC5//CNOT4//UBE2G2//BRAP//SAE1//FBXO21//DCAF6//CAND1
GO:0046660	female sex differentiation	Biological process	7	104	459	14742	2.16176	0.0436456	0.658312	1.36006	CTNNA1//FOXC1//EIF2B5//PGR//NRIP1//FANCA//FZD4
GO:0055123	digestive system development	Biological process	7	104	459	14742	2.16176	0.0436456	0.658312	1.36006	TINAG//HMGCS2//RET//XBP1//AHI1//OVOL2//SPDEF
GO:0048010	vascular endothelial growth factor receptor signaling pathway	Biological process	4	43	459	14742	2.98769	0.0440596	0.658312	1.35596	FZD4//MYOF//HIF1A//FOXC1
GO:0000076	DNA replication checkpoint	Biological process	2	11	459	14742	5.83957	0.0441758	0.658312	1.35482	CDC6//CDC45
GO:0001562	response to protozoan	Biological process	2	11	459	14742	5.83957	0.0441758	0.658312	1.35482	BCL3//CLEC7A
GO:0002070	epithelial cell maturation	Biological process	2	11	459	14742	5.83957	0.0441758	0.658312	1.35482	XBP1//PGR
GO:0006599	phosphagen metabolic process	Biological process	2	11	459	14742	5.83957	0.0441758	0.658312	1.35482	CKB//GAMT
GO:0034113	heterotypic cell-cell adhesion	Biological process	2	11	459	14742	5.83957	0.0441758	0.658312	1.35482	BMP7//CD44
GO:0042149	cellular response to glucose starvation	Biological process	2	11	459	14742	5.83957	0.0441758	0.658312	1.35482	PMAIP1//VLDLR
GO:0043555	regulation of translation in response to stress	Biological process	2	11	459	14742	5.83957	0.0441758	0.658312	1.35482	EIF2AK1//EIF2B5
GO:0048841	regulation of axon extension involved in axon guidance	Biological process	2	11	459	14742	5.83957	0.0441758	0.658312	1.35482	DSCAM//RYK
GO:0044248	cellular catabolic process	Biological process	62	1611	459	14742	1.23606	0.0454052	0.672651	1.34289	SLC25A10//RPL28//SMG5//DCP1A//UPF3B//DCP1B//TRIP12//OS9//CNOT4//MLH1//ERCC5//RPA1//SLC27A2//PPP1R3C//DHTKD1//PRKAG1//DPYD//GNAO1//GNAS//RAB7A//GNA14//GTPBP4//GNL2//NT5C2//AMPD3//ATP1A1//ATP8B1//VPS4B//DPYSL5//AIFM1//HNRNPD//UBE2G2//USP4//USP10//FBXO21//ANAPC5//GOT2//SHMT1//PCCB//SMPDL3B//ATG16L2//PMAIP1//PIK3CB//ZCCHC11//KIAA1324//AKR1C3//BUB1B//PSMD2//AURKA//AURKB//AGFG1//ARFGAP3//NET1//HSP90AB1…
GO:0009266	response to temperature stimulus	Biological process	7	105	459	14742	2.14118	0.0455691	0.672651	1.34133	EIF2B1//GCLC//EIF2B5//ADM//MYOF//SCARA5//HMGCS2
GO:0090287	regulation of cellular response to growth factor stimulus	Biological process	3	26	459	14742	3.70588	0.0458806	0.672651	1.33837	FZD4//MYOF//HIF1A
GO:0016044	cellular membrane organization	Biological process	27	615	459	14742	1.41004	0.0458811	0.672651	1.33837	SYT7//MYOF//PMAIP1//ADM//AHI1//AP2A2//PIK3CB//RAB7A//RABEP1//ARC//PACSIN1//SCARA5//FOLR1//PI4KB//VLDLR//PICALM//CLEC7A//RAMP3//ATP8B1//PPIF//GBF1//HCK//MAPK1//PIK3R1//PPP2R5A//VPS4B//TXNDC5
GO:0048468	cell development	Biological process	51	1292	459	14742	1.2678	0.045955	0.672651	1.33767	FOXD4//HIF1A//RET//OVOL2//BMP7//NOTCH4//PGR//HEY2//CELF1//CTNNA1//ERBB3//S100A6//PICALM//FZD8//AFG3L2//ALS2//AP2A2//ALCAM//COL9A3//HSP90AB1//LAMC1//PITPNA//MAPK1//RYK//EVL//DPYSL5//RBM24//EIF2B5//EIF2B1//FOXC1//NRG1//EFNB3//ZCCHC11//ADM//GNAO1//SEPT2//FZD4//AHI1//DLL1//SIX1//CDK5RAP2//SOX3//CXADR//DSCAM//SERPINF1//XRCC5//SPEN//TIAM1//CAPRIN1//SPDEF//XBP1
GO:0000723	telomere maintenance	Biological process	5	63	459	14742	2.54902	0.046085	0.672651	1.33644	RFC1//RFC2//RPA1//POLD3//XRCC5
GO:0050657	nucleic acid transport	Biological process	8	128	459	14742	2.00735	0.0467184	0.674962	1.33051	AGFG1//SMG5//NUP133//UPF3B//KHDRBS1//HNRNPA2B1//CKAP5//NUP85
GO:0050658	RNA transport	Biological process	8	128	459	14742	2.00735	0.0467184	0.674962	1.33051	AGFG1//SMG5//NUP133//UPF3B//KHDRBS1//NUP85//HNRNPA2B1//CKAP5
GO:0051236	establishment of RNA localization	Biological process	8	128	459	14742	2.00735	0.0467184	0.674962	1.33051	AGFG1//SMG5//NUP133//UPF3B//KHDRBS1//HNRNPA2B1//CKAP5//NUP85
GO:0006281	DNA repair	Biological process	18	376	459	14742	1.53755	0.0473766	0.678168	1.32444	ERCC5//RPA1//POLD3//RFC1//RFC2//PARP2//MLH1//XRCC5//CHEK2//BRCC3//PARG//FANCA//NONO//USP10//SMC3//POLQ//FANCI//BCCIP
GO:0061024	membrane organization	Biological process	27	617	459	14742	1.40547	0.0474108	0.678168	1.32412	SYT7//MYOF//PMAIP1//ADM//AHI1//AP2A2//PIK3CB//RAB7A//RABEP1//ARC//PACSIN1//SCARA5//FOLR1//PI4KB//VLDLR//PICALM//CLEC7A//GBF1//VPS4B//TXNDC5//RAMP3//ATP8B1//PPIF//HCK//MAPK1//PIK3R1//PPP2R5A
GO:0051168	nuclear export	Biological process	7	106	459	14742	2.12098	0.0475461	0.678168	1.32288	AGFG1//SMG5//NUP133//UPF3B//HSPA9//AHCYL1//KHDRBS1
GO:0044275	cellular carbohydrate catabolic process	Biological process	8	129	459	14742	1.99179	0.0485187	0.678168	1.31409	PPP1R3C//PKM2//DHTKD1//PGD//PRKAG1//GLA//FUT4//HIF1A
GO:0048812	neuron projection morphogenesis	Biological process	24	537	459	14742	1.43543	0.0486817	0.678168	1.31263	ERBB3//S100A6//PICALM//FZD8//AFG3L2//ALS2//AP2A2//ALCAM//BMP7//COL9A3//HSP90AB1//LAMC1//PITPNA//MAPK1//RYK//EVL//DPYSL5//EFNB3//ADM//CTNNA1//DSCAM//FOXD4//TIAM1//CAPRIN1
GO:0032200	telomere organization	Biological process	5	64	459	14742	2.50919	0.0487684	0.678168	1.31186	RFC1//RFC2//RPA1//POLD3//XRCC5
GO:0003015	heart process	Biological process	7	107	459	14742	2.10115	0.049577	0.678168	1.30472	ADM//ATP1A1//ADORA3//GNAO1//HEY2//MAP2K6//CXADR
GO:0060047	heart contraction	Biological process	7	107	459	14742	2.10115	0.049577	0.678168	1.30472	ADM//ATP1A1//ADORA3//GNAO1//HEY2//MAP2K6

## Sheet: CC_up
#Column "GO.ID" stands for the ID of gene ontology term
#Column "Term" stands for the name of gene ontology term
#Column "Ontology" stands for the ontology of GOID belongs to
#Column "Count" stands for the number of DE genes associated with the listed GOID
#Column "Pop.Hits" stands for the number of background population genes associated with the listed GOID
#Column "List.Total" stands for the total number of DE genes
#Column "Pop.Total" stands for the total number of background population genes
#Column "Fold.Enrichment" stands for the Fold Enrichment value of the GOID, it equals (Count/Pop.Hits)/(List.Total/Pop.Total)
#Column "Pvalue" stands for the significance testing value of the GOID
#Column "FDR" stands for the false discovery rate of the GOID, using Benjamini & Hochberg (1995) method
#Column "Enrichment.Score" stands for the Enrichment Score value of the GOID, it equals (-log10(Pvalue))
#Column "GENES" stands for the DE genes associated with the GOID
GO.ID	Term	Ontology	Count	Pop.Hits	List.Total	Pop.Total	Fold.Enrichment	Pvalue	FDR	Enrichment.Score	GENES
GO:0005737	cytoplasm	Cellular component	185	8759	302	16875	1.1802	0.00059855	0.116078	3.2229	CAV2//NTRK3//ROCK1//RASGRP1//SCARA3//GOLGA7B//CALR//DYNLRB2//GAA//HYAL1//HPSE//AKR1B10//RRAGD//RRAGC//BCL2//IFI6//IDI1//IFI27//OAS1//OAS2//KLK6//KYNU//DHRS2//COX16//PINX1//MSTO1//C9ORF46//COQ10B//ACAD10//C15ORF48//CCDC58//PRELID2//CASP1//CDKN2D//FGFR1//FKBP1B//GART//GNAI2//NR3C1//IRF6//MVK//PAK2//PGM1//PPP2CB//PRKACB//EIF2AK2//PSMB9//PTPN7//RGS3//S100A7//S100A12//SIPA1//STAT1//TPH1//TPM1//EZR//EI…
GO:0044464	cell part	Cellular component	276	14351	302	16875	1.07464	0.000619273	0.116078	3.20812	ANXA3//DAGLA//CALCR//CAV2//CD36//CD47//CD59//CDH15//CHRNB1//CRHR1//S1PR3//EFNA3//FGFR1//GJA8//GNAI1//GNAI2//FFAR2//IL1RAP//ITGAL//MME//NT5E//NTRK2//NTRK3//OPRD1//PAK2//PCDH7//PRKACB//PXN//RGS3//S100A8//S100A9//ST14//TAP2//TFPI//TMPRSS2//UPK2//EZR//WNT2//LRP8//CASK//LY6D//LIN7A//WISP2//SLC16A3//ABCG2//RIMS2//SLC12A6//ARL4A//RASGRP1//TNK2//MPZL2//SORBS1//LILRB1//DNAJB4//ERLIN2//SLC6A14//ARHGEF18//N…
GO:0005623	cell	Cellular component	276	14352	302	16875	1.07457	0.000625194	0.116078	3.20399	ANXA3//DAGLA//CALCR//CAV2//CD36//CD47//CD59//CDH15//CHRNB1//CRHR1//S1PR3//EFNA3//FGFR1//GJA8//GNAI1//GNAI2//FFAR2//IL1RAP//ITGAL//MME//NT5E//NTRK2//NTRK3//OPRD1//PAK2//PCDH7//PRKACB//PXN//RGS3//S100A8//S100A9//ST14//TAP2//TFPI//TMPRSS2//UPK2//EZR//WNT2//LRP8//CASK//LY6D//LIN7A//WISP2//SLC16A3//ABCG2//RIMS2//SLC12A6//ARL4A//RASGRP1//TNK2//MPZL2//SORBS1//LILRB1//DNAJB4//ERLIN2//SLC6A14//ARHGEF18//N…
GO:0005622	intracellular	Cellular component	241	12155	302	16875	1.1079	0.00111856	0.155759	2.95134	TBL1X//HDAC10//CAV2//NTRK3//ROCK1//RASGRP1//SCARA3//GOLGA7B//SUGT1//WWP2//FBXW11//PPP2CB//PINX1//MKI67//GNAI1//GNAI2//PCNA//PSMB9//DNMT3A//TIGD6//RAD17//SMARCA4//CDSN//CALR//DYNLRB2//KRT86//TPM1//MYL9//SORBS1//TBP//TROVE2//RBM14//GAA//HYAL1//HPSE//AKR1B10//RRAGD//RRAGC//BCL2//IFI6//IDI1//IFI27//OAS1//OAS2//KLK6//KYNU//DHRS2//COX16//MSTO1//C9ORF46//COQ10B//ACAD10//C15ORF48//CCDC58//PRELID2//CASP1/…
GO:0005626	insoluble fraction	Cellular component	28	891	302	16875	1.75597	0.00278362	0.24628	2.55539	BCL2//CAV2//CD36//CD59//GNAI2//MGST3//MME//NT5E//NTRK3//OPRD1//LY6D//SLC16A3//PTGES//RASGRP1//RASGRP4//CALR//HYAL1//LSS//OAS1//OAS2//KLK6//SQLE//UGT2B10//TMED2//FOS//NR3C1//LIN7A//S100A12
GO:0044424	intracellular part	Cellular component	234	11860	302	16875	1.10247	0.00288285	0.24628	2.54018	TBL1X//HDAC10//CAV2//NTRK3//ROCK1//RASGRP1//SCARA3//GOLGA7B//SUGT1//WWP2//FBXW11//PPP2CB//PINX1//MKI67//GNAI1//GNAI2//PCNA//PSMB9//DNMT3A//TIGD6//RAD17//SMARCA4//CDSN//CALR//DYNLRB2//KRT86//TPM1//MYL9//SORBS1//TBP//TROVE2//RBM14//GAA//HYAL1//HPSE//AKR1B10//RRAGD//RRAGC//BCL2//IFI6//IDI1//IFI27//OAS1//OAS2//KLK6//KYNU//DHRS2//COX16//MSTO1//C9ORF46//COQ10B//ACAD10//C15ORF48//CCDC58//PRELID2//CASP1/…
GO:0005624	membrane fraction	Cellular component	27	860	302	16875	1.75429	0.00334321	0.24628	2.47584	BCL2//CALR//HYAL1//LSS//MGST3//OAS1//OAS2//KLK6//SQLE//UGT2B10//PTGES//TMED2//FOS//NR3C1//LIN7A//CAV2//CD36//CD59//GNAI2//MME//NT5E//NTRK3//OPRD1//LY6D//SLC16A3//RASGRP1//RASGRP4
GO:0005792	microsome	Cellular component	12	270	302	16875	2.48344	0.00353724	0.24628	2.45134	BCL2//CALR//HYAL1//LSS//MGST3//OAS1//OAS2//KLK6//SQLE//UGT2B10//PTGES//TMED2
GO:0042598	vesicular fraction	Cellular component	12	275	302	16875	2.43829	0.00409474	0.253419	2.38777	BCL2//CALR//HYAL1//LSS//MGST3//OAS1//OAS2//KLK6//SQLE//UGT2B10//PTGES//TMED2
GO:0045335	phagocytic vesicle	Cellular component	4	40	302	16875	5.58775	0.00553576	0.308342	2.25682	ANXA3//CALR//TAP2//CD36
GO:0070161	anchoring junction	Cellular component	9	202	302	16875	2.48959	0.0107184	0.466894	1.96987	KIFC3//TNK2//SORBS1//PXN//S100A7//EZR//ZNF185//TES//CDSN
GO:0030670	phagocytic vesicle membrane	Cellular component	3	26	302	16875	6.4474	0.0108805	0.466894	1.96335	ANXA3//CALR//TAP2
GO:0005829	cytosol	Cellular component	54	2218	302	16875	1.36041	0.0109569	0.466894	1.96031	GUCY1A3//BCL2//CALR//CASP1//CAV2//CDKN2D//FGFR1//FKBP1B//GART//GNAI2//NR3C1//IDI1//IRF6//MVK//OAS1//OAS2//PAK2//PGM1//PPP2CB//PRKACB//EIF2AK2//PSMB9//PTPN7//RGS3//ROCK1//S100A7//S100A12//SIPA1//STAT1//TPH1//TPM1//EZR//EIF2B4//KYNU//ISG15//PPIP5K1//SMG7//RASGRP1//IRF9//MYL9//SORBS1//SUGT1//RNPS1//HPS5//USP18//ARHGEF9//FBXW11//ARHGEF18//PHGDH//MLXIPL//XRN1//RAP2C//CHAC1//AQP11
GO:0000267	cell fraction	Cellular component	32	1177	302	16875	1.51918	0.0119281	0.466894	1.92343	BCL2//CAV2//CD36//CD59//GNAI2//MGST3//MME//NT5E//NTRK3//OPRD1//LY6D//SLC16A3//PTGES//RASGRP1//RASGRP4//CALR//CGA//CCL5//WISP2//KYNU//S100A12//HYAL1//LSS//OAS1//OAS2//KLK6//SQLE//UGT2B10//TMED2//FOS//NR3C1//LIN7A
GO:0045121	membrane raft	Cellular component	8	173	302	16875	2.58393	0.0127981	0.466894	1.89285	CAV2//LRP8//CBLB//CD36//GNAI2//OPRD1//SORBS1//HPSE
GO:0030667	secretory granule membrane	Cellular component	4	52	302	16875	4.29827	0.0138824	0.466894	1.85753	CAV2//CD36//TMED2//VGF
GO:0045202	synapse	Cellular component	15	444	302	16875	1.88775	0.0142499	0.466894	1.84619	MME//PCLO//TRIM9//NR3C1//LIN7A//CDH15//THBS4//RIMS2//KCTD12//NMU//CHRNB1//OPRD1//SSPN//LGI1//CDH23
GO:0005634	nucleus	Cellular component	122	5793	302	16875	1.17677	0.0153922	0.476305	1.8127	TBL1X//HDAC10//PINX1//SMARCA4//TBP//DHRS2//PTGES//PCNA//CASK//ADAR//BRCA2//FOS//NR3C1//CIITA//PRKACB//PSMB9//RAD17//SFPQ//SNRPB2//STAT1//IRF9//RNPS1//MLXIPL//FOXD2//MSX2//RBM14//DNMT3A//MKI67//KLK6//EZR//BHLHE40//ARL4A//TWISTNB//DDX42//GFI1//BCL2//SLC16A3//INTS3//C11ORF9//CALR//CAV2//CBLB//CDKN2D//CHD2//KLF6//CRABP2//FGFR1//GNAI1//GNAI2//IRF6//MT1B//MT1F//NAB1//NF1//OAS1//OAS2//PAK2//PPP2CB//RBMS…
GO:0034399	nuclear periphery	Cellular component	5	85	302	16875	3.28691	0.0182153	0.492063	1.73956	PCNA//CASK//DNMT3A//GFI1//SFPQ
GO:0005912	adherens junction	Cellular component	8	185	302	16875	2.41632	0.0184601	0.492063	1.73377	SORBS1//KIFC3//PXN//S100A7//EZR//ZNF185//TES//TNK2
GO:0000791	euchromatin	Cellular component	2	12	302	16875	9.31291	0.018716	0.492063	1.72779	TBP//DNMT3A
GO:0005925	focal adhesion	Cellular component	6	118	302	16875	2.84123	0.0194352	0.492063	1.71141	PXN//S100A7//EZR//ZNF185//SORBS1//TES
GO:0016323	basolateral plasma membrane	Cellular component	10	267	302	16875	2.09279	0.0223708	0.540776	1.65032	SORBS1//PXN//S100A7//EZR//ZNF185//TES//ST14//LIN7A//SLC12A6//RHCG
GO:0005924	cell-substrate adherens junction	Cellular component	6	123	302	16875	2.72573	0.0233009	0.540776	1.63263	PXN//S100A7//EZR//ZNF185//SORBS1//TES
GO:0030055	cell-substrate junction	Cellular component	6	128	302	16875	2.61926	0.0276524	0.616095	1.55827	SORBS1//PXN//S100A7//EZR//ZNF185//TES
GO:0009898	internal side of plasma membrane	Cellular component	5	98	302	16875	2.85089	0.0313474	0.662079	1.5038	GNAI1//GNAI2//CAV2//NF1//PTPN7
GO:0005856	cytoskeleton	Cellular component	41	1714	302	16875	1.33663	0.0332924	0.662079	1.47765	PPP2CB//CDSN//DYNLRB2//KRT86//TPM1//MYL9//SORBS1//BRCA2//GNAI1//GNAI2//KIFC3//PRKACB//FBXW11//ROCK1//PINX1//MAP9//TUBB3//PXN//TBL1X//EZR//CDH23//NR3C1//LIN7A//PGM1//CASK//SLC16A3//PCNA//TWISTNB//SEPT8//KRTAP4-1//SMG7//XRN1//S100A8//S100A9//ZNF185//MPZL2//PCLO//TRIB2//SNTG1//SSH2//TRIM9
GO:0005886	plasma membrane	Cellular component	90	4229	302	16875	1.18916	0.0337911	0.662079	1.4712	GNAI1//GNAI2//ITGAL//CALCR//CAV2//CD36//CD47//CHRNB1//CRHR1//S1PR3//EFNA3//FGFR1//GJA8//FFAR2//IL1RAP//MME//NTRK2//NTRK3//OPRD1//PCDH7//ST14//TMPRSS2//UPK2//SSPN//SLC16A3//RHCG//C9ORF46//SORBS1//LRP8//KIFC3//LIN7A//PXN//S100A7//EZR//ZNF185//TES//KCTD12//CALR//LILRB1//PTPN7//SNTG1//SLC12A6//TRPM6//NF1//CD59//SLC6A14//TPM1//ANXA3//DAGLA//CDH15//NT5E//PAK2//PRKACB//RGS3//S100A8//S100A9//TAP2//TFPI//…
GO:0030054	cell junction	Cellular component	19	678	302	16875	1.56589	0.0363433	0.662079	1.43958	CDSN//CASK//KIFC3//TNK2//SORBS1//GJA8//LIN7A//PXN//S100A7//EZR//ZNF185//TES//CHRNB1//SSPN//LGI1//RIMS2//PCLO//TRIM9//KCTD12
GO:0044459	plasma membrane part	Cellular component	47	2024	302	16875	1.29755	0.036581	0.662079	1.43674	GNAI1//GNAI2//ITGAL//CALCR//CAV2//CD36//CD47//CHRNB1//CRHR1//S1PR3//EFNA3//FGFR1//GJA8//FFAR2//IL1RAP//MME//NTRK2//NTRK3//OPRD1//PCDH7//ST14//TMPRSS2//UPK2//SSPN//SLC16A3//RHCG//C9ORF46//SORBS1//LRP8//KIFC3//LIN7A//PXN//S100A7//EZR//ZNF185//TES//KCTD12//CALR//LILRB1//PTPN7//SNTG1//SLC12A6//TRPM6//NF1//CD59//SLC6A14//TPM1
GO:0071944	cell periphery	Cellular component	91	4298	302	16875	1.18307	0.0368482	0.662079	1.43358	ANXA3//DAGLA//CALCR//CAV2//CD36//CD47//CD59//CDH15//CHRNB1//CRHR1//S1PR3//EFNA3//FGFR1//GJA8//GNAI1//GNAI2//FFAR2//IL1RAP//ITGAL//MME//NT5E//NTRK2//NTRK3//OPRD1//PAK2//PCDH7//PRKACB//PXN//RGS3//S100A8//S100A9//ST14//TAP2//TFPI//TMPRSS2//UPK2//EZR//WNT2//LRP8//CASK//LY6D//LIN7A//WISP2//SLC16A3//ABCG2//RIMS2//SLC12A6//ARL4A//RASGRP1//TNK2//MPZL2//SORBS1//LILRB1//DNAJB4//ERLIN2//SLC6A14//ARHGEF18//N…
GO:0044420	extracellular matrix part	Cellular component	7	178	302	16875	2.19743	0.0413459	0.662117	1.38357	MFAP2//COL4A5//SCARA3//C1QTNF3//THBS4//CASK//SMOC2
GO:0044456	synapse part	Cellular component	11	338	302	16875	1.8185	0.0414936	0.662117	1.38202	MME//PCLO//TRIM9//NR3C1//LIN7A//RIMS2//KCTD12//NMU//CHRNB1//OPRD1//SSPN
GO:0031982	vesicle	Cellular component	23	876	302	16875	1.4671	0.0428289	0.662117	1.36826	CALR//CAV2//TMED2//VGF//SSPN//BRCA2//MME//PCLO//TRIM9//FGFR1//CHIC1//TNK2//KIFC3//N4BP3//ANXA3//TAP2//CD36//GAS6//HYAL1//RHCG//BMP5//CRHR1//OPRD1
GO:0001725	stress fiber	Cellular component	3	44	302	16875	3.80983	0.04386	0.662117	1.35793	TPM1//MYL9//SORBS1
GO:0016363	nuclear matrix	Cellular component	4	76	302	16875	2.94092	0.04734	0.662117	1.32477	DNMT3A//GFI1//SFPQ//CASK
GO:0044421	extracellular region part	Cellular component	27	1078	302	16875	1.39953	0.0486399	0.662117	1.31301	MFAP2//COL4A5//SCARA3//C1QTNF3//CALR//WNT2//THBS4//CASK//SMOC2//BMP5//GAS6//CXCL1//HYAL1//S100A8//S100A9//CCL5//CCL22//ST14//TFPI//TPSAB1//VGF//LRP8//LGI1//ISG15//CXCL16//IGFL1//SLPI
GO:0032432	actin filament bundle	Cellular component	3	46	302	16875	3.64418	0.0489937	0.662117	1.30986	TPM1//MYL9//SORBS1
GO:0016010	dystrophin-associated glycoprotein complex	Cellular component	2	20	302	16875	5.58775	0.0490713	0.662117	1.30917	SNTG1//SSPN
GO:0019897	extrinsic to plasma membrane	Cellular component	4	77	302	16875	2.90273	0.0492599	0.662117	1.30751	GNAI1//GNAI2//CAV2//ST14
GO:0030659	cytoplasmic vesicle membrane	Cellular component	10	306	302	16875	1.82606	0.0493158	0.662117	1.30701	CAV2//VGF//TMED2//ANXA3//CALR//TAP2//CD36//KIFC3//TNK2//N4BP3

## Sheet: CC_down
#Column "GO.ID" stands for the ID of gene ontology term
#Column "Term" stands for the name of gene ontology term
#Column "Ontology" stands for the ontology of GOID belongs to
#Column "Count" stands for the number of DE genes associated with the listed GOID
#Column "Pop.Hits" stands for the number of background population genes associated with the listed GOID
#Column "List.Total" stands for the total number of DE genes
#Column "Pop.Total" stands for the total number of background population genes
#Column "Fold.Enrichment" stands for the Fold Enrichment value of the GOID, it equals (Count/Pop.Hits)/(List.Total/Pop.Total)
#Column "Pvalue" stands for the significance testing value of the GOID
#Column "FDR" stands for the false discovery rate of the GOID, using Benjamini & Hochberg (1995) method
#Column "Enrichment.Score" stands for the Enrichment Score value of the GOID, it equals (-log10(Pvalue))
#Column "GENES" stands for the DE genes associated with the GOID
GO.ID	Term	Ontology	Count	Pop.Hits	List.Total	Pop.Total	Fold.Enrichment	Pvalue	FDR	Enrichment.Score	GENES
GO:0044424	intracellular part	Cellular component	402	11860	497	16875	1.15088	3.15418e-08	7.24273e-06	7.50111	HDAC1//NRIP1//HDAC8//TADA2A//MAN1A1//CHST1//GALNT4//GBF1//ATP2C2//COG2//GORASP2//ARFGAP3//RHOU//HS3ST5//SEPT2//EXOC1//BRAP//FBXO21//CAND1//BRCC3//PPP2R5A//RPL28//SMARCB1//NCAPD2//ADD3//RPA1//H2AFY//CDK5RAP2//GNAO1//GNAS//GNA14//PSMD2//TRIP12//DNMT3A//SMC3//BUB1//BUB1B//CENPC1//DCTN2//NUP85//KNTC1//NUP133//CENPM//AURKB//CHEK2//XRCC5//PARG//PDS5A//MUC1//SMARCA4//NCOA1//TIMELESS//KLHDC3//TOP2B//MLH1…
GO:0070013	intracellular organelle lumen	Cellular component	118	2470	497	16875	1.62208	3.29573e-08	7.24273e-06	7.48205	HDAC1//NRIP1//HDAC8//TADA2A//SMARCB1//NCAPD2//ADD3//RPA1//BUB1//CENPC1//AURKB//XRCC5//MUC1//SMARCA4//NCOA1//TIMELESS//KLHDC3//MLH1//TOP2B//SMC3//EIF3L//SUZ12//H2AFY//CDC6//CSTF3//DUSP2//E2F2//ERCC5//FANCA//HNRNPA2B1//HNRNPD//MCM3//HNRNPM//NCL//NOTCH4//PGR//PRKAB2//PRKAG1//MAPK1//MAP2K6//PSMD2//RFC1//RFC2//RRM1//TTF1//XBP1//CDC45//NOLC1//DDX23//PARP2//KIF20A//HNRNPR//POLD3//POLQ//PAPOLA//SF3B2//CH…
GO:0005694	chromosome	Cellular component	43	597	497	16875	2.44558	6.24787e-08	7.24273e-06	7.20427	SMARCB1//NCAPD2//HDAC8//ADD3//RPA1//H2AFY//DNMT3A//PPP2R5A//SMC3//BUB1//BUB1B//CENPC1//DCTN2//NUP85//SEPT2//KNTC1//NUP133//CENPM//AURKB//CHEK2//XRCC5//PARG//PDS5A//MUC1//SMARCA4//NCOA1//TIMELESS//KLHDC3//TOP2B//MLH1//NCAPH//NCAPG//SUZ12//MCM3//RFC1//RFC2//FOXC1//HDAC1//HEY2//POLD3//TADA2A//WHSC1//EHMT1
GO:0031974	membrane-enclosed lumen	Cellular component	120	2559	497	16875	1.5922	6.91435e-08	7.24273e-06	7.16025	HDAC1//NRIP1//HDAC8//TADA2A//SMARCB1//NCAPD2//ADD3//RPA1//BUB1//CENPC1//AURKB//XRCC5//MUC1//SMARCA4//NCOA1//TIMELESS//KLHDC3//MLH1//TOP2B//SMC3//EIF3L//SUZ12//H2AFY//CDC6//CSTF3//DUSP2//E2F2//ERCC5//FANCA//HNRNPA2B1//HNRNPD//MCM3//HNRNPM//NCL//NOTCH4//PGR//PRKAB2//PRKAG1//MAPK1//MAP2K6//PSMD2//RFC1//RFC2//RRM1//TTF1//XBP1//CDC45//NOLC1//DDX23//PARP2//KIF20A//HNRNPR//POLD3//POLQ//PAPOLA//SF3B2//CH…
GO:0031981	nuclear lumen	Cellular component	100	2009	497	16875	1.69008	7.03711e-08	7.24273e-06	7.15261	HDAC1//NRIP1//HDAC8//TADA2A//SMARCB1//NCAPD2//ADD3//RPA1//BUB1//CENPC1//AURKB//XRCC5//MUC1//SMARCA4//NCOA1//TIMELESS//KLHDC3//MLH1//TOP2B//SMC3//EIF3L//SUZ12//H2AFY//CDC6//CSTF3//DUSP2//E2F2//ERCC5//FANCA//HNRNPA2B1//HNRNPD//MCM3//HNRNPM//NCL//NOTCH4//PGR//PRKAB2//PRKAG1//MAPK1//MAP2K6//PSMD2//RFC1//RFC2//RRM1//TTF1//XBP1//CDC45//NOLC1//DDX23//PARP2//KIF20A//HNRNPR//POLD3//POLQ//PAPOLA//SF3B2//CH…
GO:0043233	organelle lumen	Cellular component	118	2515	497	16875	1.59306	9.00455e-08	7.24273e-06	7.04554	HDAC1//NRIP1//HDAC8//TADA2A//SMARCB1//NCAPD2//ADD3//RPA1//BUB1//CENPC1//AURKB//XRCC5//MUC1//SMARCA4//NCOA1//TIMELESS//KLHDC3//MLH1//TOP2B//SMC3//EIF3L//SUZ12//H2AFY//CDC6//CSTF3//DUSP2//E2F2//ERCC5//FANCA//HNRNPA2B1//HNRNPD//MCM3//HNRNPM//NCL//NOTCH4//PGR//PRKAB2//PRKAG1//MAPK1//MAP2K6//PSMD2//RFC1//RFC2//RRM1//TTF1//XBP1//CDC45//NOLC1//DDX23//PARP2//KIF20A//HNRNPR//POLD3//POLQ//PAPOLA//SF3B2//CH…
GO:0044428	nuclear part	Cellular component	113	2376	497	16875	1.6148	9.10218e-08	7.24273e-06	7.04085	HDAC1//NRIP1//HDAC8//TADA2A//BRCC3//SMARCB1//NCAPD2//ADD3//RPA1//BUB1//CENPC1//AURKB//XRCC5//MUC1//SMARCA4//NCOA1//TIMELESS//KLHDC3//MLH1//TOP2B//SMC3//EIF3L//SUZ12//H2AFY//S100A6//MYOF//NUP133//NUP85//AGFG1//CDC6//CSTF3//DUSP2//E2F2//ERCC5//FANCA//HNRNPA2B1//HNRNPD//MCM3//HNRNPM//NCL//NOTCH4//PGR//PRKAB2//PRKAG1//MAPK1//MAP2K6//PSMD2//RFC1//RFC2//RRM1//TTF1//XBP1//CDC45//NOLC1//DDX23//PARP2//KIF…
GO:0005634	nucleus	Cellular component	225	5793	497	16875	1.31876	1.97059e-07	1.37202e-05	6.7054	HDAC1//NRIP1//HDAC8//TADA2A//BRCC3//SMARCB1//NCAPD2//ADD3//RPA1//BUB1//CENPC1//AURKB//XRCC5//MUC1//SMARCA4//NCOA1//TIMELESS//KLHDC3//MLH1//TOP2B//SMC3//EIF3L//SUZ12//H2AFY//S100A6//MYOF//NUP133//NUP85//AGFG1//CDC6//CSTF3//DUSP2//E2F2//ERCC5//FANCA//HNRNPA2B1//HNRNPD//MCM3//HNRNPM//NCL//NOTCH4//PGR//PRKAB2//PRKAG1//MAPK1//MAP2K6//PSMD2//RFC1//RFC2//RRM1//TTF1//XBP1//CDC45//NOLC1//DDX23//PARP2//KIF…
GO:0044427	chromosomal part	Cellular component	37	503	497	16875	2.49759	3.2213e-07	1.90615e-05	6.49197	DNMT3A//PPP2R5A//SMC3//BUB1//BUB1B//CENPC1//DCTN2//NUP85//SEPT2//KNTC1//NUP133//CENPM//AURKB//CHEK2//XRCC5//PARG//PDS5A//H2AFY//MUC1//SMARCA4//NCOA1//TIMELESS//KLHDC3//TOP2B//MLH1//NCAPD2//NCAPH//NCAPG//SUZ12//MCM3//RFC1//RFC2//RPA1//FOXC1//HDAC1//HEY2//POLD3
GO:0000228	nuclear chromosome	Cellular component	25	266	497	16875	3.19114	3.42218e-07	1.90615e-05	6.4657	ADD3//RPA1//BUB1//CENPC1//AURKB//XRCC5//MUC1//SMARCA4//NCOA1//TIMELESS//KLHDC3//MLH1//TOP2B//SMC3//SUZ12//H2AFY//MCM3//DNMT3A//FOXC1//HDAC1//HEY2//POLD3//SMARCB1//NCAPD2//HDAC8
GO:0005737	cytoplasm	Cellular component	311	8759	497	16875	1.20557	7.31203e-07	3.70255e-05	6.13596	MAN1A1//CHST1//GALNT4//GBF1//ATP2C2//COG2//GORASP2//ARFGAP3//RHOU//HS3ST5//SEPT2//EXOC1//RPL28//CDK5RAP2//OS9//CKAP5//CAPRIN1//DCP1A//CTNNA1//CXADR//ARC//CTSL2//GLA//HCK//MANBA//PRCP//USP4//RAB7A//SYT7//VPS4B//RAMP3//KIAA1324//ALDH9A1//CKB//SLC25A10//GOT2//HMGCS2//HSPA9//HSP90AB1//KCNJ8//MTHFD1//NDUFV1//PCCB//PI4KB//PMAIP1//MAPK1//SHMT1//SPG7//UQCRC1//AKAP1//AIFM1//DDX23//PPIF//POLD3//AFG3L2//SLC…
GO:0005622	intracellular	Cellular component	404	12155	497	16875	1.12853	8.25091e-07	3.80909e-05	6.0835	HDAC1//NRIP1//HDAC8//TADA2A//MAN1A1//CHST1//GALNT4//GBF1//ATP2C2//COG2//GORASP2//ARFGAP3//RHOU//HS3ST5//SEPT2//EXOC1//BRAP//FBXO21//CAND1//BRCC3//PPP2R5A//RPL28//SMARCB1//NCAPD2//ADD3//RPA1//H2AFY//CDK5RAP2//GNAO1//GNAS//GNA14//PSMD2//TRIP12//DNMT3A//SMC3//BUB1//BUB1B//CENPC1//DCTN2//NUP85//KNTC1//NUP133//CENPM//AURKB//CHEK2//XRCC5//PARG//PDS5A//MUC1//SMARCA4//NCOA1//TIMELESS//KLHDC3//TOP2B//MLH1…
GO:0000793	condensed chromosome	Cellular component	18	157	497	16875	3.89278	8.89016e-07	3.80909e-05	6.05109	ADD3//RPA1//BUB1//BUB1B//CENPC1//SEPT2//KNTC1//NUP133//CENPM//NUP85//AURKB//MLH1//TOP2B//NCAPD2//NCAPH//NCAPG//SMC3//H2AFY
GO:0005654	nucleoplasm	Cellular component	72	1421	497	16875	1.72039	3.60894e-06	0.000143584	5.44262	HDAC1//NRIP1//HDAC8//TADA2A//E2F2//FOXC1//FOXD4//HIF1A//FOXK2//NHLH2//SIX1//GSC//ERCC5//ELL2//ELP2//NOLC1//HEY2//SALL2//CTR9//LEO1//RPA1//CHEK2//CDC5L//SF3B1//SPEN//SUZ12//HNRNPM//NONO//MCM3//FANCA//PELP1//CDC6//CSTF3//DUSP2//HNRNPA2B1//HNRNPD//NCL//NOTCH4//PGR//PRKAB2//PRKAG1//MAPK1//MAP2K6//PSMD2//RFC1//RFC2//RRM1//SMARCB1//TOP2B//TTF1//XBP1//XRCC5//CDC45//NCOA1//SMC3//DDX23//PARP2//KIF20A//HNR…
GO:0043231	intracellular membrane-bounded organelle	Cellular component	318	9191	497	16875	1.17477	8.00171e-06	0.000295748	5.09682	HDAC1//NRIP1//HDAC8//TADA2A//MAN1A1//CHST1//GALNT4//GBF1//ATP2C2//COG2//GORASP2//ARFGAP3//RHOU//HS3ST5//BRCC3//SMARCB1//NCAPD2//ADD3//RPA1//BUB1//CENPC1//AURKB//XRCC5//MUC1//SMARCA4//NCOA1//TIMELESS//KLHDC3//MLH1//TOP2B//SMC3//OS9//EIF3L//CTNNA1//CXADR//ARC//SUZ12//H2AFY//CTSL2//GLA//HCK//MANBA//PRCP//USP4//RAB7A//SYT7//VPS4B//RAMP3//KIAA1324//ALDH9A1//CKB//SLC25A10//GOT2//HMGCS2//HSPA9//HSP90AB1…
GO:0044454	nuclear chromosome part	Cellular component	20	221	497	16875	3.07274	9.0215e-06	0.000295748	5.04472	BUB1//CENPC1//AURKB//XRCC5//MUC1//SMARCA4//NCOA1//TIMELESS//KLHDC3//MLH1//TOP2B//SMC3//SUZ12//MCM3//RPA1//DNMT3A//FOXC1//HDAC1//HEY2//POLD3
GO:0043227	membrane-bounded organelle	Cellular component	318	9201	497	16875	1.17349	9.02643e-06	0.000295748	5.04448	HDAC1//NRIP1//HDAC8//TADA2A//MAN1A1//CHST1//GALNT4//GBF1//ATP2C2//COG2//GORASP2//ARFGAP3//RHOU//HS3ST5//BRCC3//SMARCB1//NCAPD2//ADD3//RPA1//BUB1//CENPC1//AURKB//XRCC5//MUC1//SMARCA4//NCOA1//TIMELESS//KLHDC3//MLH1//TOP2B//SMC3//OS9//EIF3L//CTNNA1//CXADR//ARC//SUZ12//H2AFY//CTSL2//GLA//HCK//MANBA//PRCP//USP4//RAB7A//SYT7//VPS4B//RAMP3//KIAA1324//ALDH9A1//CKB//SLC25A10//GOT2//HMGCS2//HSPA9//HSP90AB1…
GO:0044446	intracellular organelle part	Cellular component	218	5923	497	16875	1.24969	2.56851e-05	0.00079481	4.59032	HDAC1//NRIP1//HDAC8//TADA2A//MAN1A1//CHST1//GALNT4//GBF1//ATP2C2//COG2//GORASP2//ARFGAP3//RHOU//HS3ST5//BRCC3//RPL28//SMARCB1//NCAPD2//ADD3//RPA1//CDK5RAP2//DNMT3A//PPP2R5A//SMC3//BUB1//BUB1B//CENPC1//DCTN2//NUP85//SEPT2//KNTC1//NUP133//CENPM//AURKB//CHEK2//XRCC5//PARG//PDS5A//H2AFY//MUC1//SMARCA4//NCOA1//TIMELESS//KLHDC3//TOP2B//MLH1//NCAPH//NCAPG//OS9//CDC6//NEDD9//PRC1//CKAP5//EIF3L//SUZ12//SL…
GO:0043228	non-membrane-bounded organelle	Cellular component	123	2986	497	16875	1.39863	3.75407e-05	0.00104551	4.4255	RPL28//SMARCB1//NCAPD2//HDAC8//ADD3//RPA1//H2AFY//CDK5RAP2//DNMT3A//PPP2R5A//SMC3//BUB1//BUB1B//CENPC1//DCTN2//NUP85//SEPT2//KNTC1//NUP133//CENPM//AURKB//CHEK2//XRCC5//PARG//PDS5A//MUC1//SMARCA4//NCOA1//TIMELESS//KLHDC3//TOP2B//MLH1//NCAPH//NCAPG//CDC6//NEDD9//PRC1//CKAP5//CAPRIN1//DCP1A//CSTA//EIF3L//SUZ12//RHOU//MRPS27//MCM3//RFC1//RFC2//TADA2A//WHSC1//EHMT1//FOXC1//CDC5L//DDX5//HIF1A//HNRNPA2B…
GO:0043232	intracellular non-membrane-bounded organelle	Cellular component	123	2986	497	16875	1.39863	3.75407e-05	0.00104551	4.4255	RPL28//SMARCB1//NCAPD2//HDAC8//ADD3//RPA1//H2AFY//CDK5RAP2//DNMT3A//PPP2R5A//SMC3//BUB1//BUB1B//CENPC1//DCTN2//NUP85//SEPT2//KNTC1//NUP133//CENPM//AURKB//CHEK2//XRCC5//PARG//PDS5A//MUC1//SMARCA4//NCOA1//TIMELESS//KLHDC3//TOP2B//MLH1//NCAPH//NCAPG//CDC6//NEDD9//PRC1//CKAP5//CAPRIN1//DCP1A//CSTA//EIF3L//SUZ12//RHOU//MRPS27//MCM3//RFC1//RFC2//TADA2A//WHSC1//EHMT1//FOXC1//CDC5L//DDX5//HIF1A//HNRNPA2B…
GO:0044422	organelle part	Cellular component	219	6001	497	16875	1.2391	4.43694e-05	0.00117684	4.35292	HDAC1//NRIP1//HDAC8//TADA2A//MAN1A1//CHST1//GALNT4//GBF1//ATP2C2//COG2//GORASP2//ARFGAP3//RHOU//HS3ST5//BRCC3//RPL28//SMARCB1//NCAPD2//ADD3//RPA1//CDK5RAP2//DNMT3A//PPP2R5A//SMC3//BUB1//BUB1B//CENPC1//DCTN2//NUP85//SEPT2//KNTC1//NUP133//CENPM//AURKB//CHEK2//XRCC5//PARG//PDS5A//H2AFY//MUC1//SMARCA4//NCOA1//TIMELESS//KLHDC3//TOP2B//MLH1//NCAPH//NCAPG//OS9//CDC6//NEDD9//PRC1//CKAP5//EIF3L//SUZ12//SL…
GO:0071013	catalytic step 2 spliceosome	Cellular component	10	80	497	16875	4.24422	0.000116411	0.00294733	3.934	CDC5L//DDX5//HNRNPA2B1//HNRNPM//DDX23//HNRNPR//SF3B2//RALY//SF3B1//ISY1
GO:0043229	intracellular organelle	Cellular component	340	10221	497	16875	1.12947	0.000141993	0.00343869	3.84773	HDAC1//NRIP1//HDAC8//TADA2A//MAN1A1//CHST1//GALNT4//GBF1//ATP2C2//COG2//GORASP2//ARFGAP3//RHOU//HS3ST5//BRCC3//RPL28//SMARCB1//NCAPD2//ADD3//RPA1//H2AFY//CDK5RAP2//DNMT3A//PPP2R5A//SMC3//BUB1//BUB1B//CENPC1//DCTN2//NUP85//SEPT2//KNTC1//NUP133//CENPM//AURKB//CHEK2//XRCC5//PARG//PDS5A//MUC1//SMARCA4//NCOA1//TIMELESS//KLHDC3//TOP2B//MLH1//NCAPH//NCAPG//OS9//CDC6//NEDD9//PRC1//CKAP5//CAPRIN1//DCP1A//…
GO:0043226	organelle	Cellular component	340	10236	497	16875	1.12781	0.000166044	0.0038536	3.77978	HDAC1//NRIP1//HDAC8//TADA2A//MAN1A1//CHST1//GALNT4//GBF1//ATP2C2//COG2//GORASP2//ARFGAP3//RHOU//HS3ST5//BRCC3//RPL28//SMARCB1//NCAPD2//ADD3//RPA1//H2AFY//CDK5RAP2//DNMT3A//PPP2R5A//SMC3//BUB1//BUB1B//CENPC1//DCTN2//NUP85//SEPT2//KNTC1//NUP133//CENPM//AURKB//CHEK2//XRCC5//PARG//PDS5A//MUC1//SMARCA4//NCOA1//TIMELESS//KLHDC3//TOP2B//MLH1//NCAPH//NCAPG//OS9//CDC6//NEDD9//PRC1//CKAP5//CAPRIN1//DCP1A//…
GO:0044444	cytoplasmic part	Cellular component	226	6396	497	16875	1.19974	0.00027858	0.00620676	3.55505	MAN1A1//CHST1//GALNT4//GBF1//ATP2C2//COG2//GORASP2//ARFGAP3//RHOU//HS3ST5//SEPT2//EXOC1//RPL28//CDK5RAP2//OS9//CKAP5//CAPRIN1//DCP1A//CTNNA1//CXADR//ARC//CTSL2//GLA//HCK//MANBA//PRCP//USP4//RAB7A//SYT7//VPS4B//RAMP3//KIAA1324//ALDH9A1//CKB//SLC25A10//GOT2//HMGCS2//HSPA9//HSP90AB1//KCNJ8//MTHFD1//NDUFV1//PCCB//PI4KB//PMAIP1//MAPK1//SHMT1//SPG7//UQCRC1//AKAP1//AIFM1//DDX23//PPIF//POLD3//AFG3L2//SLC…
GO:0000794	condensed nuclear chromosome	Cellular component	8	59	497	16875	4.60389	0.000316999	0.00679109	3.49894	BUB1//CENPC1//AURKB//MLH1//TOP2B//SMC3//ADD3//RPA1
GO:0032991	macromolecular complex	Cellular component	141	3692	497	16875	1.29672	0.000332973	0.0068691	3.47759	HDAC1//NRIP1//HDAC8//TADA2A//SEPT2//EXOC1//BRAP//FBXO21//CAND1//BRCC3//PPP2R5A//RPL28//GNAO1//GNAS//GNA14//PSMD2//TRIP12//BUB1//BUB1B//CENPC1//DCTN2//NUP85//KNTC1//NUP133//CENPM//XRCC5//H2AFY//NCAPD2//NCAPH//NCAPG//OS9//CKAP5//CAPRIN1//DCP1A//RHOU//DDX5//HNRNPA2B1//HNRNPD//HNRNPM//NCL//HNRNPR//CELF1//AZGP1//MRPS27//LAMC1//AGFG1//MCM3//RFC1//RFC2//RPA1//E2F2//FOXC1//FOXD4//HIF1A//FOXK2//NHLH2//SIX…
GO:0005829	cytosol	Cellular component	92	2218	497	16875	1.40836	0.000367319	0.00730702	3.43496	RPL28//PIK3CB//PIK3R1//AP2A2//ALDH9A1//AMPD3//BLMH//BUB1//BUB1B//CA2//CAPZB//CDC6//CENPC1//AKR1C4//CKB//CTNNA1//CTPS//AKR1C1//DPYD//EIF2B1//EIF4G2//GAMT//GCLC//GSS//HCK//HDAC1//HNRNPD//HSP90AB1//JAK1//CAPRIN1//MTHFD1//CNOT4//NOTCH4//PDE8A//PGD//SERPINB6//PKM2//PLCB4//PMAIP1//PRKAB2//PRKAG1//MAPK1//MAP2K6//PSMD2//QARS//RRM1//S100A6//SHMT1//AURKA//SULT1A1//THRSP//TIAM1//TNNT1//TOP2B//UBE2G2//UMPS//…
GO:0043234	protein complex	Cellular component	121	3103	497	16875	1.32401	0.00046096	0.00885362	3.33634	HDAC1//NRIP1//HDAC8//TADA2A//SEPT2//EXOC1//BRAP//FBXO21//CAND1//BRCC3//PPP2R5A//GNAO1//GNAS//GNA14//PSMD2//TRIP12//BUB1//BUB1B//CENPC1//DCTN2//NUP85//KNTC1//NUP133//CENPM//NCAPD2//NCAPH//NCAPG//OS9//CKAP5//RHOU//AZGP1//LAMC1//AGFG1//MCM3//RFC1//RFC2//RPA1//E2F2//FOXC1//FOXD4//HIF1A//FOXK2//NHLH2//SIX1//GSC//ERCC5//ANAPC5//NDUFV1//UQCRC1//SCYL1//EIF2B1//EIF2B5//EIF3L//TNNT1//KIF20A//MID2//STAU2//H…
GO:0000775	chromosome, centromeric region	Cellular component	13	153	497	16875	2.88496	0.000604011	0.0112145	3.21895	BUB1//BUB1B//CENPC1//DCTN2//NUP85//SEPT2//KNTC1//NUP133//CENPM//AURKB//DNMT3A//PPP2R5A//SMC3
GO:0000779	condensed chromosome, centromeric region	Cellular component	9	82	497	16875	3.72663	0.000674882	0.0121261	3.17077	BUB1//BUB1B//CENPC1//SEPT2//KNTC1//NUP133//CENPM//NUP85//AURKB
GO:0030530	heterogeneous nuclear ribonucleoprotein complex	Cellular component	4	18	497	16875	7.54527	0.00163743	0.0285015	2.78584	HNRNPA2B1//HNRNPD//HNRNPR//RALY
GO:0000777	condensed chromosome kinetochore	Cellular component	8	77	497	16875	3.52766	0.00189756	0.0311234	2.7218	BUB1B//NUP133//BUB1//CENPC1//SEPT2//KNTC1//CENPM//NUP85
GO:0005819	spindle	Cellular component	15	216	497	16875	2.3579	0.00189981	0.0311234	2.72129	CDC6//NEDD9//PRC1//SMC3//KNTC1//CKAP5//CDK5RAP2//AURKA//BUB1B//SEPT2//CDC14A//AURKB//KIF20A//HAUS4//NUP85
GO:0000776	kinetochore	Cellular component	9	96	497	16875	3.18316	0.00208016	0.0331042	2.6819	BUB1//BUB1B//CENPC1//SEPT2//KNTC1//NUP133//CENPM//NUP85//DCTN2
GO:0008023	transcription elongation factor complex	Cellular component	4	21	497	16875	6.46738	0.0029864	0.0462062	2.52485	CTR9//LEO1//ELL2//ELP2
GO:0000922	spindle pole	Cellular component	8	87	497	16875	3.12218	0.00408541	0.0615019	2.38876	AURKA//CDC6//NEDD9//PRC1//SMC3//KNTC1//CKAP5//CDK5RAP2
GO:0005657	replication fork	Cellular component	5	37	497	16875	4.58834	0.00434774	0.0637287	2.36174	MCM3//RFC1//RFC2//RPA1//POLD3
GO:0005730	nucleolus	Cellular component	29	590	497	16875	1.66891	0.00507469	0.0713378	2.29459	EIF3L//CDC5L//DDX5//HIF1A//HNRNPA2B1//NCL//SEPT2//SIX1//SMARCB1//TTF1//WHSC1//NOLC1//BCLAF1//PARP2//RCL1//ZNF274//ZCCHC11//GTPBP4//CD2AP//SPATS2L//STAU2//GNL2//GLTSCR2//NMD3//NSUN2//ELP2//DDX24//EFCAB4B//LEO1
GO:0000790	nuclear chromatin	Cellular component	10	130	497	16875	2.61182	0.005123	0.0713378	2.29048	SUZ12//DNMT3A//FOXC1//HDAC1//HEY2//MUC1//SMARCA4//NCOA1//TIMELESS//KLHDC3
GO:0005811	lipid particle	Cellular component	4	25	497	16875	5.4326	0.00575237	0.0754667	2.24015	PLIN2//AKAP1//PLIN3//PLIN5
GO:0015630	microtubule cytoskeleton	Cellular component	37	812	497	16875	1.54715	0.0057572	0.0754667	2.23979	CDK5RAP2//CDC6//NEDD9//PRC1//SMC3//KNTC1//CKAP5//MCM3//SERPINB6//AURKA//CDC45//CDC14A//ESPL1//DCTN2//ZNF274//MID2//RAB3GAP1//POC1A//AHI1//HAUS4//ALS2//NCAPG//CCDC77//SYTL4//BUB1B//MAPK1//BBS9//SCYL1//SEPT2//AURKB//KIF20A//NUP85//STAU2//KIF21A//CAMSAP1//TUBB8//NCAPH
GO:0000780	condensed nuclear chromosome, centromeric region	Cellular component	3	13	497	16875	7.83547	0.00582598	0.0754667	2.23463	BUB1//CENPC1//AURKB
GO:0016585	chromatin remodeling complex	Cellular component	9	114	497	16875	2.68056	0.0065511	0.0829309	2.18369	HDAC1//NRIP1//HDAC8//SMARCA4//SMARCB1//HEY2//SALL2//BPTF//TOP2B
GO:0019898	extrinsic to membrane	Cellular component	9	116	497	16875	2.63434	0.00732091	0.0906165	2.13544	GNAO1//GNAS//GNA14//CTNNA1//SYTL2//HCK//S100A6//FARP1//SYTL4
GO:0019897	extrinsic to plasma membrane	Cellular component	7	77	497	16875	3.0867	0.00750703	0.0909004	2.12453	GNAO1//GNAS//GNA14//CTNNA1//HCK//S100A6//SYTL2
GO:0005681	spliceosomal complex	Cellular component	10	140	497	16875	2.42527	0.00852277	0.101004	2.06942	SF3B2//SF3B1//CDC5L//DDX5//HNRNPA2B1//HNRNPM//DDX23//HNRNPR//RALY//ISY1
GO:0005815	microtubule organizing center	Cellular component	23	462	497	16875	1.69034	0.0102669	0.119139	1.98856	CDK5RAP2//CKAP5//MCM3//SERPINB6//AURKA//CDC45//CDC14A//ESPL1//DCTN2//ZNF274//MID2//RAB3GAP1//POC1A//AHI1//HAUS4//ALS2//NCAPG//CCDC77//SYTL4//BUB1B//MAPK1//BBS9//SCYL1
GO:0005813	centrosome	Cellular component	19	361	497	16875	1.78704	0.0109024	0.122776	1.96248	CDK5RAP2//POC1A//AHI1//AURKA//MCM3//SERPINB6//CDC45//CDC14A//ESPL1//CKAP5//DCTN2//ZNF274//MID2//RAB3GAP1//HAUS4//ALS2//NCAPG//CCDC77//SYTL4
GO:0000118	histone deacetylase complex	Cellular component	5	46	497	16875	3.69062	0.0110212	0.122776	1.95777	HDAC1//HEY2//SALL2//NRIP1//HDAC8
GO:0030894	replisome	Cellular component	3	17	497	16875	5.99183	0.0126943	0.135975	1.89639	MCM3//RPA1//POLD3
GO:0043601	nuclear replisome	Cellular component	3	17	497	16875	5.99183	0.0126943	0.135975	1.89639	MCM3//RPA1//POLD3
GO:0031234	extrinsic to internal side of plasma membrane	Cellular component	5	49	497	16875	3.46467	0.014274	0.150012	1.84545	GNAO1//GNAS//GNA14//HCK//S100A6
GO:0005788	endoplasmic reticulum lumen	Cellular component	8	111	497	16875	2.44712	0.0168363	0.173663	1.77375	TOR1A//NOTCH4//NTF4//PDIA5//OS9//SLC27A2//UGGT2//TXNDC5
GO:0000803	sex chromosome	Cellular component	3	19	497	16875	5.36111	0.0173205	0.17541	1.76144	SUZ12//H2AFY//SMARCB1
GO:0000785	chromatin	Cellular component	15	280	497	16875	1.81895	0.0192099	0.19107	1.71648	H2AFY//MUC1//SMARCA4//NCOA1//TIMELESS//KLHDC3//DNMT3A//TOP2B//SUZ12//FOXC1//HDAC1//HEY2//PARG//SMC3//PDS5A
GO:0005912	adherens junction	Cellular component	11	185	497	16875	2.01887	0.0213391	0.208524	1.67082	CDH3//CTNNA1//HCK//NEDD9//MAPK1//EVL//RHOU//AIF1L//MPP7//CXADR//AHI1
GO:0070603	SWI/SNF-type complex	Cellular component	3	21	497	16875	4.85053	0.0227661	0.218633	1.64271	SMARCA4//SMARCB1//TOP2B
GO:0000795	synaptonemal complex	Cellular component	3	22	497	16875	4.63005	0.0257976	0.239488	1.58842	SMC3//MLH1//TOP2B
GO:0043596	nuclear replication fork	Cellular component	3	22	497	16875	4.63005	0.0257976	0.239488	1.58842	MCM3//RPA1//POLD3
GO:0044464	cell part	Cellular component	438	14351	497	16875	1.03629	0.026512	0.240199	1.57656	ADAM10//ADD3//PLIN2//ADORA3//AP2A2//ALDH9A1//ATP1A1//CFB//CD44//CDH3//CHRM1//CTNNA1//CXADR//DSCAM//EDA//EIF2B1//ERBB3//FOLR1//GNAO1//GNAS//GOT2//GRM4//HCK//NRG1//IL4R//KCNJ8//MARK3//MUC1//CEACAM6//NCAM2//SEPT2//NOTCH4//ATP8B1//PIK3R1//PKM2//PRCP//RET//RYK//S100A6//SLC6A6//TIAM1//VLDLR//ARHGEF5//FZD4//FZD8//PPAP2A//SKAP1//PRC1//SLC16A7//MAGI1//DDX23//GNA14//GPC6//ABCC4//RAMP3//SLC19A2//STK38L//ARC…
GO:0005623	cell	Cellular component	438	14352	497	16875	1.03621	0.0267367	0.240199	1.57289	ADAM10//ADD3//PLIN2//ADORA3//AP2A2//ALDH9A1//ATP1A1//CFB//CD44//CDH3//CHRM1//CTNNA1//CXADR//DSCAM//EDA//EIF2B1//ERBB3//FOLR1//GNAO1//GNAS//GOT2//GRM4//HCK//NRG1//IL4R//KCNJ8//MARK3//MUC1//CEACAM6//NCAM2//SEPT2//NOTCH4//ATP8B1//PIK3R1//PKM2//PRCP//RET//RYK//S100A6//SLC6A6//TIAM1//VLDLR//ARHGEF5//FZD4//FZD8//PPAP2A//SKAP1//PRC1//SLC16A7//MAGI1//DDX23//GNA14//GPC6//ABCC4//RAMP3//SLC19A2//STK38L//ARC…
GO:0005720	nuclear heterochromatin	Cellular component	3	23	497	16875	4.42875	0.0290346	0.256703	1.53708	SUZ12//DNMT3A//FOXC1
GO:0000267	cell fraction	Cellular component	46	1177	497	16875	1.32699	0.0300895	0.261873	1.52158	ATP1A1//CA4//CHRM1//DSCAM//EDA//EIF2B1//FOLR1//FUT4//GNAS//KCNJ8//MAN1A1//ATP8B1//PPP2R5A//RYK//UGT2B17//VLDLR//PPAP2A//SYT7//SLC16A7//PPIF//ABCC4//CLEC2D//SYTL2//ADD3//ADM//BLMH//CTSL2//TOR1A//GLA//GSS//MANBA//PPP1R3C//MAPK1//SMARCB1//PARG//AIFM1//RAB3GAP1//ARFIP2//SOAT1//UGT2B15//SLC27A2//CYP26B1//ALS2//GNAO1//SEPT2//SEC61A1
GO:0000152	nuclear ubiquitin ligase complex	Cellular component	3	24	497	16875	4.24422	0.032476	0.268887	1.48844	BUB1B//ANAPC5//BRCC3
GO:0016580	Sin3 complex	Cellular component	2	10	497	16875	6.79074	0.0333091	0.268887	1.47744	HDAC1//HEY2
GO:0030128	clathrin coat of endocytic vesicle	Cellular component	2	10	497	16875	6.79074	0.0333091	0.268887	1.47744	AP2A2//PICALM
GO:0031080	Nup107-160 complex	Cellular component	2	10	497	16875	6.79074	0.0333091	0.268887	1.47744	NUP133//NUP85
GO:0070822	Sin3-type complex	Cellular component	2	10	497	16875	6.79074	0.0333091	0.268887	1.47744	HDAC1//HEY2
GO:0070161	anchoring junction	Cellular component	11	202	497	16875	1.84897	0.0372272	0.296222	1.42914	CXADR//AHI1//MPP7//CDH3//CTNNA1//HCK//NEDD9//MAPK1//EVL//RHOU//AIF1L
GO:0071564	npBAF complex	Cellular component	2	11	497	16875	6.1734	0.0399308	0.31326	1.39869	SMARCA4//SMARCB1
GO:0005794	Golgi apparatus	Cellular component	43	1116	497	16875	1.30825	0.0427973	0.331085	1.36858	MAN1A1//CHST1//GALNT4//GBF1//ATP2C2//COG2//GORASP2//ARFGAP3//RHOU//HS3ST5//MUC1//NOTCH4//MUCL1//ADAM10//SCYL1//PACSIN1//CA4//KIAA1324//FAM109B//FUT4//APH1A//GNAS//C11ORF2//GLA//HCK//AGFG1//NEDD9//PI4KB//MAPK1//RAB7A//PICALM//FZD8//VAPB//KIF20A//PLIN3//AP4S1//PASK//GTPBP4//GRHL1//SYTL2//ELP2//CDK5RAP2//EFCAB4B
GO:0000940	condensed chromosome outer kinetochore	Cellular component	2	12	497	16875	5.65895	0.0470008	0.344466	1.32789	BUB1B//NUP133
GO:0051233	spindle midzone	Cellular component	2	12	497	16875	5.65895	0.0470008	0.344466	1.32789	BUB1B//CDC6
GO:0071203	WASH complex	Cellular component	2	12	497	16875	5.65895	0.0470008	0.344466	1.32789	CAPZB//FAM21C
GO:0071565	nBAF complex	Cellular component	2	12	497	16875	5.65895	0.0470008	0.344466	1.32789	SMARCA4//SMARCB1
GO:0044430	cytoskeletal part	Cellular component	46	1219	497	16875	1.28127	0.0494616	0.355348	1.30573	CDK5RAP2//CDC6//NEDD9//PRC1//SMC3//KNTC1//CKAP5//RHOU//MCM3//SERPINB6//AURKA//CDC45//CDC14A//ESPL1//DCTN2//ZNF274//MID2//RAB3GAP1//POC1A//AHI1//HAUS4//ALS2//NCAPG//CCDC77//SYTL4//BUB1B//MAPK1//BBS9//SCYL1//SEPT2//AURKB//KIF20A//NUP85//TNNT1//STAU2//KIF21A//CAMSAP1//TUBB8//HCK//AIF1L//CAPZB//ADAM10//CHRM1//ARC//MYO19//CD2AP
GO:0005624	membrane fraction	Cellular component	34	860	497	16875	1.34236	0.049914	0.355348	1.30178	ATP1A1//KCNJ8//PPP1R3C//SOAT1//UGT2B15//UGT2B17//PARG//AIFM1//SLC27A2//CYP26B1//ALS2//GNAO1//SEPT2//SEC61A1//CA4//CHRM1//DSCAM//EDA//EIF2B1//FOLR1//FUT4//GNAS//MAN1A1//ATP8B1//PPP2R5A//RYK//VLDLR//PPAP2A//SYT7//SLC16A7//PPIF//ABCC4//CLEC2D//SYTL2

## Sheet: MF_up
#Column "GO.ID" stands for the ID of gene ontology term
#Column "Term" stands for the name of gene ontology term
#Column "Ontology" stands for the ontology of GOID belongs to
#Column "Count" stands for the number of DE genes associated with the listed GOID
#Column "Pop.Hits" stands for the number of background population genes associated with the listed GOID
#Column "List.Total" stands for the total number of DE genes
#Column "Pop.Total" stands for the total number of background population genes
#Column "Fold.Enrichment" stands for the Fold Enrichment value of the GOID, it equals (Count/Pop.Hits)/(List.Total/Pop.Total)
#Column "Pvalue" stands for the significance testing value of the GOID
#Column "FDR" stands for the false discovery rate of the GOID, using Benjamini & Hochberg (1995) method
#Column "Enrichment.Score" stands for the Enrichment Score value of the GOID, it equals (-log10(Pvalue))
#Column "GENES" stands for the DE genes associated with the GOID
GO.ID	Term	Ontology	Count	Pop.Hits	List.Total	Pop.Total	Fold.Enrichment	Pvalue	FDR	Enrichment.Score	GENES
GO:0005515	protein binding	Molecular function	155	6731	274	15325	1.28796	1.48342e-05	0.0138255	4.82874	CALR//DNAJB4//WWP2//BHLHE40//GNAI2//USP20//CBLB//MFAP2//THBS4//BCL2//BRCA2//SMARCA4//TBL1X//BAG2//TPM1//SORBS1//SNTG1//SSH2//SYNPO2//RBM14//EZR//FKBP1B//GAS6//CXCL1//ARTN//LGI1//NMU//CXCL16//ITGAL//NTRK3//NTRK2//BLNK//ITSN2//EFNA3//WNT2//BMP5//STAT1//CGA//VGF//CASK//CAMKK2//WISP2//PCLO//NR3C1//PCNA//CD36//CCL5//CCL22//PXN//CIITA//MKI67//PPP2CB//PLEKHB1//DBI//FOXD2//HYAL1//MSX2//NAB1//TBP//TWIST1/…
GO:0005488	binding	Molecular function	234	11840	274	15325	1.10539	0.00046055	0.204422	3.33672	CALR//DNAJB4//DBI//CHD2//ELAVL4//FGFR1//GART//GNAI1//GNAI2//GUCY1A3//KIFC3//CIITA//MKI67//MVK//NT5E//NTRK2//NTRK3//OAS1//OAS2//PAK2//PRKACB//EIF2AK2//RAD17//RBMS1//ROCK1//SFPQ//SMARCA4//SNRPB2//TAP2//UBA1//CASK//FPGT//ABCG2//PPIP5K1//ARL4A//TNK2//DHRS2//TUBB3//RBM14//CAMKK2//RNPS1//DDX42//CDK19//SEPT8//UBE2W//RNF213//RAB40C//RAP2C//RRAGD//RRAGC//PIP4K2C//AASDH//TRPM6//HIPK1//NLRP9//BCL2//BRCA2//C…
GO:0005509	calcium ion binding	Molecular function	24	662	274	15325	2.0277	0.000829518	0.204422	3.08117	ANXA8L2//ANXA3//CALR//CBLB//CDH15//GAS6//PCDH7//S100A3//S100A7//S100A8//S100A9//S100A12//STAT1//THBS4//LRP8//RASGRP1//MYL9//CAMKK2//PCLO//ITSN2//CDH26//CDH23//SMOC2//S100A7A
GO:0030234	enzyme regulator activity	Molecular function	30	946	274	15325	1.7737	0.00164283	0.204422	2.78441	TRIB2//CDKN2D//CAST//SLPI//TFPI//CST11//GNAI1//GNAI2//EIF2B4//RASGRP1//ARHGEF9//ARHGEF18//RASGRP4//ITSN2//TNK2//RGS3//SIPA1//TBC1D10C//TBCK//SGSM1//NF1//CXCL1//SMAP1//EIF2AK2//CASP1//PINX1//CCL5//ANXA3//PAK2//PCNA
GO:0000975	regulatory region DNA binding	Molecular function	14	316	274	15325	2.47794	0.00170143	0.204422	2.76919	NKX6-3//STAT1//FOS//GFI1//CIITA//MSX2//TBL1X//TBP//ARID5B//MLXIPL//TWIST1//BHLHE40//IRF6//IRF9
GO:0001067	regulatory region nucleic acid binding	Molecular function	14	316	274	15325	2.47794	0.00170143	0.204422	2.76919	IRF6//IRF9//NKX6-3//STAT1//FOS//GFI1//CIITA//MSX2//TBL1X//TBP//ARID5B//MLXIPL//TWIST1//BHLHE40
GO:0008134	transcription factor binding	Molecular function	16	391	274	15325	2.28872	0.00185126	0.204422	2.73253	WWP2//BHLHE40//SMARCA4//CIITA//TWIST1//TBP//BCL2//FOXD2//HYAL1//MSX2//NAB1//PCNA//TBL1X//TRIB2//MLXIPL//LCOR
GO:0030971	receptor tyrosine kinase binding	Molecular function	4	30	274	15325	7.45742	0.00189954	0.204422	2.72135	BLNK//GAS6//NR3C1//PCNA
GO:0001664	G-protein coupled receptor binding	Molecular function	10	188	274	15325	2.97503	0.00207967	0.204422	2.68201	WNT2//CXCL1//CCL5//CCL22//CXCL16//CAV2//GNAI1//NMU//GNAI2//USP20
GO:0030228	lipoprotein particle receptor activity	Molecular function	3	15	274	15325	11.1861	0.00219337	0.204422	2.65889	CD36//CXCL16//LRP8
GO:0005102	receptor binding	Molecular function	32	1093	274	15325	1.63749	0.0040033	0.339189	2.39758	GNAI2//USP20//BLNK//EFNA3//WNT2//BMP5//SORBS1//STAT1//CALR//THBS4//CGA//VGF//GAS6//NR3C1//PCNA//CXCL1//CCL5//CCL22//CXCL16//DBI//ARTN//DYX1C1//CAV2//GNAI1//TAP2//LILRB1//NMU//SMARCA4//S100A7//S100A12//FKBP1B//LGI1
GO:0030695	GTPase regulator activity	Molecular function	16	432	274	15325	2.07151	0.00491199	0.35621	2.30874	GNAI1//GNAI2//EIF2B4//RASGRP1//ARHGEF9//ARHGEF18//RASGRP4//ITSN2//TNK2//RGS3//SIPA1//TBC1D10C//TBCK//SGSM1//NF1//SMAP1
GO:0038024	cargo receptor activity	Molecular function	5	62	274	15325	4.51054	0.00496859	0.35621	2.30377	CD36//CXCL16//TMPRSS2//SCARA3//LRP8
GO:0060589	nucleoside-triphosphatase regulator activity	Molecular function	16	444	274	15325	2.01552	0.00634694	0.405843	2.19744	GNAI1//GNAI2//EIF2B4//RASGRP1//ARHGEF9//ARHGEF18//RASGRP4//ITSN2//TNK2//RGS3//SIPA1//TBC1D10C//TBCK//SGSM1//NF1//SMAP1
GO:0046983	protein dimerization activity	Molecular function	23	734	274	15325	1.7526	0.00653181	0.405843	2.18497	BCL2//CAV2//CDSN//FGFR1//NR3C1//NTRK2//CCL5//STAT1//TWIST1//BHLHE40//KYNU//ABCG2//LILRB1//PLEKHB1//TRIM9//ITGAL//MLXIPL//RRAGD//RRAGC//FOS//HPSE//FBXW11//BATF2
GO:0005544	calcium-dependent phospholipid binding	Molecular function	3	24	274	15325	6.99133	0.00866648	0.464701	2.06216	ANXA8L2//ANXA3//PCLO
GO:0004713	protein tyrosine kinase activity	Molecular function	8	163	274	15325	2.74506	0.00906709	0.464701	2.04253	NTRK3//EIF2AK2//STAT1//TNK2//EFNA3//FGFR1//NTRK2//CAMKK2
GO:0044212	transcription regulatory region DNA binding	Molecular function	12	307	274	15325	2.18621	0.0094082	0.464701	2.02649	NKX6-3//STAT1//MLXIPL//TWIST1//BHLHE40//FOS//GFI1//CIITA//MSX2//TBL1X//TBP//ARID5B
GO:0008009	chemokine activity	Molecular function	4	47	274	15325	4.76006	0.00975813	0.464701	2.01063	CXCL1//CCL5//CCL22//CXCL16
GO:0035639	purine ribonucleoside triphosphate binding	Molecular function	46	1829	274	15325	1.40668	0.010345	0.464701	1.98527	CHD2//FGFR1//GART//KIFC3//CIITA//MKI67//MVK//NTRK2//NTRK3//OAS1//OAS2//PAK2//PRKACB//EIF2AK2//RAD17//ROCK1//SMARCA4//TAP2//UBA1//NME5//CASK//ABCG2//PPIP5K1//TNK2//CAMKK2//DDX42//CDK19//TRIB2//UBE2W//PIP4K2C//TBCK//AASDH//TRPM6//HIPK1//NLRP9//GNAI1//GNAI2//GUCY1A3//FPGT//ARL4A//TUBB3//SEPT8//RAB40C//RAP2C//RRAGD//RRAGC
GO:0016772	transferase activity, transferring phosphorus-containing groups	Molecular function	27	942	274	15325	1.60311	0.0104707	0.464701	1.98002	PPIP5K1//OAS1//OAS2//TWISTNB//CASK//MVK//NME5//PAK2//EIF2AK2//ROCK1//CCL5//TBCK//PRKACB//TNK2//CDK19//TRPM6//HIPK1//CAMKK2//FGFR1//NTRK3//STAT1//EFNA3//PIP4K2C//FPGT//NTRK2//TRIB2//ACAD10
GO:0005085	guanyl-nucleotide exchange factor activity	Molecular function	8	171	274	15325	2.61664	0.0118879	0.503613	1.9249	RASGRP4//ARHGEF9//ARHGEF18//ITSN2//GNAI1//GNAI2//EIF2B4//RASGRP1
GO:0032555	purine ribonucleotide binding	Molecular function	46	1860	274	15325	1.38323	0.0137545	0.506131	1.86155	CHD2//FGFR1//GART//KIFC3//CIITA//MKI67//MVK//NTRK2//NTRK3//OAS1//OAS2//PAK2//PRKACB//EIF2AK2//RAD17//ROCK1//SMARCA4//TAP2//UBA1//NME5//CASK//ABCG2//PPIP5K1//TNK2//CAMKK2//DDX42//CDK19//TRIB2//UBE2W//PIP4K2C//TBCK//AASDH//TRPM6//HIPK1//NLRP9//GNAI1//GNAI2//GUCY1A3//FPGT//ARL4A//TUBB3//SEPT8//RAB40C//RAP2C//RRAGD//RRAGC
GO:0032553	ribonucleotide binding	Molecular function	46	1861	274	15325	1.38249	0.0138784	0.506131	1.85766	CHD2//FGFR1//GART//KIFC3//CIITA//MKI67//MVK//NTRK2//NTRK3//OAS1//OAS2//PAK2//PRKACB//EIF2AK2//RAD17//ROCK1//SMARCA4//TAP2//UBA1//NME5//CASK//ABCG2//PPIP5K1//TNK2//CAMKK2//DDX42//CDK19//TRIB2//UBE2W//PIP4K2C//TBCK//AASDH//TRPM6//HIPK1//NLRP9//GNAI1//GNAI2//GUCY1A3//FPGT//ARL4A//TUBB3//SEPT8//RAB40C//RAP2C//RRAGD//RRAGC
GO:0031625	ubiquitin protein ligase binding	Molecular function	6	111	274	15325	3.02328	0.0146972	0.506131	1.83277	BCL2//CALR//PRKACB//CUL2//TRIB2//C10ORF46
GO:0044389	small conjugating protein ligase binding	Molecular function	6	111	274	15325	3.02328	0.0146972	0.506131	1.83277	BCL2//CALR//PRKACB//CUL2//TRIB2//C10ORF46
GO:0017076	purine nucleotide binding	Molecular function	46	1873	274	15325	1.37363	0.0154376	0.506131	1.81142	CHD2//FGFR1//GART//KIFC3//CIITA//MKI67//MVK//NTRK2//NTRK3//OAS1//OAS2//PAK2//PRKACB//EIF2AK2//RAD17//ROCK1//SMARCA4//TAP2//UBA1//NME5//CASK//ABCG2//PPIP5K1//TNK2//CAMKK2//DDX42//CDK19//TRIB2//UBE2W//PIP4K2C//TBCK//AASDH//TRPM6//HIPK1//NLRP9//GNAI1//GNAI2//GUCY1A3//FPGT//ARL4A//TUBB3//SEPT8//RAB40C//RAP2C//RRAGD//RRAGC
GO:0005041	low-density lipoprotein receptor activity	Molecular function	2	11	274	15325	10.1692	0.0157487	0.506131	1.80275	CD36//CXCL16
GO:0030296	protein tyrosine kinase activator activity	Molecular function	2	11	274	15325	10.1692	0.0157487	0.506131	1.80275	CCL5//PAK2
GO:0042379	chemokine receptor binding	Molecular function	4	55	274	15325	4.06768	0.0167074	0.509127	1.77709	CXCL1//CCL5//CCL22//CXCL16
GO:0000166	nucleotide binding	Molecular function	56	2379	274	15325	1.31657	0.0169345	0.509127	1.77123	CHD2//FGFR1//GART//KIFC3//CIITA//MKI67//MVK//NTRK2//NTRK3//OAS1//OAS2//PAK2//PRKACB//EIF2AK2//RAD17//ROCK1//SMARCA4//TAP2//UBA1//NME5//CASK//ABCG2//PPIP5K1//TNK2//CAMKK2//DDX42//CDK19//TRIB2//UBE2W//PIP4K2C//TBCK//AASDH//TRPM6//HIPK1//NLRP9//GNAI1//GNAI2//GUCY1A3//FPGT//ARL4A//TUBB3//SEPT8//RAB40C//RAP2C//RRAGD//RRAGC//PHGDH//ELAVL4//NT5E//RBMS1//SFPQ//SNRPB2//DHRS2//RBM14//RNPS1//RNF213
GO:0003690	double-stranded DNA binding	Molecular function	7	155	274	15325	2.5259	0.0215012	0.616146	1.66754	PCNA//KLF6//FOXD2//FOS//NR3C1//RBMS1//STAT1
GO:0048018	receptor agonist activity	Molecular function	2	13	274	15325	8.60472	0.0218163	0.616146	1.66122	GAS6//WNT2
GO:0042288	MHC class I protein binding	Molecular function	2	14	274	15325	7.99009	0.025156	0.685587	1.59936	TAP2//LILRB1
GO:0003725	double-stranded RNA binding	Molecular function	3	36	274	15325	4.66089	0.026144	0.685587	1.58263	ADAR//OAS1//EIF2AK2
GO:0005083	small GTPase regulator activity	Molecular function	10	277	274	15325	2.01916	0.0276294	0.685587	1.55863	RASGRP4//ARHGEF9//ARHGEF18//ITSN2//TBCK//SGSM1//TBC1D10C//NF1//SMAP1//SIPA1
GO:0036094	small molecule binding	Molecular function	58	2547	274	15325	1.27365	0.0277472	0.685587	1.55678	CHD2//ELAVL4//FGFR1//GART//GNAI1//GNAI2//GUCY1A3//KIFC3//CIITA//MKI67//MVK//NT5E//NTRK2//NTRK3//OAS1//OAS2//PAK2//PRKACB//EIF2AK2//RAD17//RBMS1//ROCK1//SFPQ//SMARCA4//SNRPB2//TAP2//UBA1//CASK//FPGT//ABCG2//PPIP5K1//ARL4A//TNK2//DHRS2//TUBB3//RBM14//CAMKK2//RNPS1//DDX42//CDK19//SEPT8//UBE2W//RNF213//RAB40C//RAP2C//RRAGD//RRAGC//PIP4K2C//AASDH//TRPM6//HIPK1//NLRP9//NME5//TRIB2//TBCK//CRABP2//KYNU//…
GO:0042277	peptide binding	Molecular function	6	129	274	15325	2.60143	0.0284131	0.685587	1.54648	TAP2//CALCR//PTGES//CRHR1//CALR//MME
GO:0051721	protein phosphatase 2A binding	Molecular function	2	15	274	15325	7.45742	0.0286887	0.685587	1.54229	BCL2//SMG7
GO:0004435	phosphatidylinositol phospholipase C activity	Molecular function	3	38	274	15325	4.41558	0.0300996	0.70132	1.52144	GNAI1//GNAI2//CCL5
GO:0004714	transmembrane receptor protein tyrosine kinase activity	Molecular function	4	67	274	15325	3.33914	0.0318499	0.724003	1.49689	EFNA3//FGFR1//NTRK2//NTRK3
GO:0016776	phosphotransferase activity, phosphate group as acceptor	Molecular function	3	40	274	15325	4.1948	0.034352	0.762287	1.46405	PPIP5K1//CASK//NME5
GO:0030545	receptor regulator activity	Molecular function	3	41	274	15325	4.09249	0.0365887	0.793038	1.43665	GAS6//WNT2//CCL5
GO:0042803	protein homodimerization activity	Molecular function	15	504	274	15325	1.6646	0.0377343	0.79928	1.42326	BCL2//CAV2//CDSN//FGFR1//NR3C1//NTRK2//CCL5//STAT1//TWIST1//BHLHE40//KYNU//ABCG2//LILRB1//PLEKHB1//TRIM9
GO:0019838	growth factor binding	Molecular function	5	104	274	15325	2.68897	0.0388103	0.803803	1.41105	NTRK3//NTRK2//WISP2//CD36//FGFR1
GO:0070566	adenylyltransferase activity	Molecular function	2	18	274	15325	6.21452	0.0403669	0.806288	1.39397	OAS1//OAS2
GO:0043566	structure-specific DNA binding	Molecular function	8	216	274	15325	2.07151	0.0406604	0.806288	1.39083	KLF6//FOXD2//FOS//NR3C1//RBMS1//STAT1//BRCA2//PCNA
GO:0001968	fibronectin binding	Molecular function	2	19	274	15325	5.88744	0.0445946	0.848208	1.35072	MFAP2//THBS4
GO:0043425	bHLH transcription factor binding	Molecular function	2	19	274	15325	5.88744	0.0445946	0.848208	1.35072	BHLHE40//TWIST1
GO:0005044	scavenger receptor activity	Molecular function	3	45	274	15325	3.72871	0.0462598	0.862282	1.3348	TMPRSS2//SCARA3//CXCL16
GO:0005099	Ras GTPase activator activity	Molecular function	5	111	274	15325	2.5194	0.0490158	0.89574	1.30966	TBCK//SGSM1//TBC1D10C//SIPA1//NF1

## Sheet: MF_down
#Column "GO.ID" stands for the ID of gene ontology term
#Column "Term" stands for the name of gene ontology term
#Column "Ontology" stands for the ontology of GOID belongs to
#Column "Count" stands for the number of DE genes associated with the listed GOID
#Column "Pop.Hits" stands for the number of background population genes associated with the listed GOID
#Column "List.Total" stands for the total number of DE genes
#Column "Pop.Total" stands for the total number of background population genes
#Column "Fold.Enrichment" stands for the Fold Enrichment value of the GOID, it equals (Count/Pop.Hits)/(List.Total/Pop.Total)
#Column "Pvalue" stands for the significance testing value of the GOID
#Column "FDR" stands for the false discovery rate of the GOID, using Benjamini & Hochberg (1995) method
#Column "Enrichment.Score" stands for the Enrichment Score value of the GOID, it equals (-log10(Pvalue))
#Column "GENES" stands for the DE genes associated with the GOID
GO.ID	Term	Ontology	Count	Pop.Hits	List.Total	Pop.Total	Fold.Enrichment	Pvalue	FDR	Enrichment.Score	GENES
GO:0036094	small molecule binding	Molecular function	123	2547	468	15325	1.58136	5.26198e-08	4.07716e-05	7.27885	ATP1A1//BUB1//BUB1B//CDC6//CKB//CTPS//DDX5//TOR1A//ERBB3//GCLC//GNAO1//GNAS//GSS//HCK//HNRNPA2B1//HNRNPD//HSPA9//HSP90AB1//JAK1//MARK3//MCM3//MAP3K5//MTHFD1//HNRNPM//NCL//SEPT2//NONO//CNOT4//PCCB//ATP8B1//PIK3CB//PI4KB//PKM2//PRKAG1//MAPK1//MAPK6//MAP2K6//QARS//RET//RFC1//RFC2//RYK//SMARCA4//SPG7//AURKA//TOP2B//UBE2G2//XRCC5//RAB7A//BRAP//SMC3//AURKB//NOLC1//MAGI1//DDX23//VPS4B//GNA14//TMEM63A//A…
GO:0000166	nucleotide binding	Molecular function	116	2379	468	15325	1.59668	8.74928e-08	4.07716e-05	7.05803	ATP1A1//BUB1//BUB1B//CDC6//CKB//CTPS//DDX5//TOR1A//ERBB3//GCLC//GSS//HCK//HSPA9//HSP90AB1//JAK1//KCNJ8//MARK3//MCM3//MAP3K5//MLH1//MTHFD1//PCCB//ATP8B1//PIK3CB//PI4KB//PKM2//PRKAG1//MAPK1//MAPK6//MAP2K6//QARS//RET//RFC1//RFC2//RRM1//RYK//SMARCA4//SPG7//AURKA//TOP2B//UBE2G2//XRCC5//SMC3//AURKB//NOLC1//MAGI1//DDX23//VPS4B//ATP2C2//KIF20A//ABCC4//SPEG//ABCA10//POLQ//PAPOLA//AFG3L2//ASCC3//SLC27A2//C…
GO:0005515	protein binding	Molecular function	259	6731	468	15325	1.26001	3.0882e-07	9.59402e-05	6.51029	TOR1A//HSPA9//HSP90AB1//SPG7//DNAJC7//AFG3L2//DNAJC22//SPEN//NHLH2//HEY2//GNA14//MAPK1//CLEC7A//CFB//VLDLR//OS9//CSTA//SERPINB6//MUC1//SMARCA4//SMARCB1//USP10//EHMT1//AGR3//NASP//NCAPD2//ADD3//CAPZB//TMSB15A//STK38L//EVL//MYO19//FHDC1//MTSS1L//BCL3//CTNNA1//AIF1L//ADAM10//ADM//ALCAM//CXADR//EDA//GLA//NRG1//PGR//CXCL12//NRIP1//FZD8//NXPH3//CNPY4//PIK3R1//ERBB3//NGFRAP1//SKAP1//KHDRBS1//HSH2D//DUSP…
GO:0005524	ATP binding	Molecular function	79	1486	468	15325	1.74086	6.29407e-07	0.000146652	6.20107	ATP1A1//BUB1//BUB1B//CDC6//CKB//CTPS//DDX5//TOR1A//ERBB3//GCLC//GSS//HCK//HSPA9//HSP90AB1//JAK1//KCNJ8//MARK3//MCM3//MAP3K5//MLH1//MTHFD1//PCCB//ATP8B1//PIK3CB//PI4KB//PKM2//PRKAG1//MAPK1//MAPK6//MAP2K6//QARS//RET//RFC1//RFC2//RRM1//RYK//SMARCA4//SPG7//AURKA//TOP2B//UBE2G2//XRCC5//SMC3//AURKB//NOLC1//MAGI1//DDX23//VPS4B//ATP2C2//KIF20A//ABCC4//SPEG//ABCA10//POLQ//PAPOLA//AFG3L2//ASCC3//SLC27A2//C…
GO:0030554	adenyl nucleotide binding	Molecular function	80	1521	468	15325	1.72233	8.09759e-07	0.000150939	6.09164	ATP1A1//BUB1//BUB1B//CDC6//CKB//CTPS//DDX5//TOR1A//ERBB3//GCLC//GSS//HCK//HSPA9//HSP90AB1//JAK1//KCNJ8//MARK3//MCM3//MAP3K5//MLH1//MTHFD1//PCCB//ATP8B1//PIK3CB//PI4KB//PKM2//PRKAG1//MAPK1//MAPK6//MAP2K6//QARS//RET//RFC1//RFC2//RRM1//RYK//SMARCA4//SPG7//AURKA//TOP2B//UBE2G2//XRCC5//SMC3//AURKB//NOLC1//MAGI1//DDX23//VPS4B//ATP2C2//KIF20A//ABCC4//SPEG//ABCA10//POLQ//PAPOLA//AFG3L2//ASCC3//SLC27A2//C…
GO:0032559	adenyl ribonucleotide binding	Molecular function	79	1511	468	15325	1.71205	1.21719e-06	0.000184096	5.91464	ATP1A1//BUB1//BUB1B//CDC6//CKB//CTPS//DDX5//TOR1A//ERBB3//GCLC//GSS//HCK//HSPA9//HSP90AB1//JAK1//KCNJ8//MARK3//MCM3//MAP3K5//MLH1//MTHFD1//PCCB//ATP8B1//PIK3CB//PI4KB//PKM2//PRKAG1//MAPK1//MAPK6//MAP2K6//QARS//RET//RFC1//RFC2//RRM1//RYK//SMARCA4//SPG7//AURKA//TOP2B//UBE2G2//XRCC5//SMC3//AURKB//NOLC1//MAGI1//DDX23//VPS4B//ATP2C2//KIF20A//ABCC4//SPEG//ABCA10//POLQ//PAPOLA//AFG3L2//ASCC3//SLC27A2//C…
GO:0035639	purine ribonucleoside triphosphate binding	Molecular function	91	1829	468	15325	1.62923	1.38269e-06	0.000184096	5.85927	ATP1A1//BUB1//BUB1B//CDC6//CKB//CTPS//DDX5//TOR1A//ERBB3//GCLC//GSS//HCK//HSPA9//HSP90AB1//JAK1//KCNJ8//MARK3//MCM3//MAP3K5//MLH1//MTHFD1//PCCB//ATP8B1//PIK3CB//PI4KB//PKM2//PRKAG1//MAPK1//MAPK6//MAP2K6//QARS//RET//RFC1//RFC2//RRM1//RYK//SMARCA4//SPG7//AURKA//TOP2B//UBE2G2//XRCC5//SMC3//AURKB//NOLC1//MAGI1//DDX23//VPS4B//ATP2C2//KIF20A//ABCC4//SPEG//ABCA10//POLQ//PAPOLA//AFG3L2//ASCC3//SLC27A2//C…
GO:0017076	purine nucleotide binding	Molecular function	92	1873	468	15325	1.60844	2.06828e-06	0.000240955	5.68439	ATP1A1//BUB1//BUB1B//CDC6//CKB//CTPS//DDX5//TOR1A//ERBB3//GCLC//GSS//HCK//HSPA9//HSP90AB1//JAK1//KCNJ8//MARK3//MCM3//MAP3K5//MLH1//MTHFD1//PCCB//ATP8B1//PIK3CB//PI4KB//PKM2//PRKAG1//MAPK1//MAPK6//MAP2K6//QARS//RET//RFC1//RFC2//RRM1//RYK//SMARCA4//SPG7//AURKA//TOP2B//UBE2G2//XRCC5//SMC3//AURKB//NOLC1//MAGI1//DDX23//VPS4B//ATP2C2//KIF20A//ABCC4//SPEG//ABCA10//POLQ//PAPOLA//AFG3L2//ASCC3//SLC27A2//C…
GO:0032555	purine ribonucleotide binding	Molecular function	91	1860	468	15325	1.60208	2.81673e-06	0.000268488	5.55025	ATP1A1//BUB1//BUB1B//CDC6//CKB//CTPS//DDX5//TOR1A//ERBB3//GCLC//GSS//HCK//HSPA9//HSP90AB1//JAK1//KCNJ8//MARK3//MCM3//MAP3K5//MLH1//MTHFD1//PCCB//ATP8B1//PIK3CB//PI4KB//PKM2//PRKAG1//MAPK1//MAPK6//MAP2K6//QARS//RET//RFC1//RFC2//RRM1//RYK//SMARCA4//SPG7//AURKA//TOP2B//UBE2G2//XRCC5//SMC3//AURKB//NOLC1//MAGI1//DDX23//VPS4B//ATP2C2//KIF20A//ABCC4//SPEG//ABCA10//POLQ//PAPOLA//AFG3L2//ASCC3//SLC27A2//C…
GO:0032553	ribonucleotide binding	Molecular function	91	1861	468	15325	1.60121	2.88077e-06	0.000268488	5.54049	ATP1A1//BUB1//BUB1B//CDC6//CKB//CTPS//DDX5//TOR1A//ERBB3//GCLC//GSS//HCK//HSPA9//HSP90AB1//JAK1//KCNJ8//MARK3//MCM3//MAP3K5//MLH1//MTHFD1//PCCB//ATP8B1//PIK3CB//PI4KB//PKM2//PRKAG1//MAPK1//MAPK6//MAP2K6//QARS//RET//RFC1//RFC2//RRM1//RYK//SMARCA4//SPG7//AURKA//TOP2B//UBE2G2//XRCC5//SMC3//AURKB//NOLC1//MAGI1//DDX23//VPS4B//ATP2C2//KIF20A//ABCC4//SPEG//ABCA10//POLQ//PAPOLA//AFG3L2//ASCC3//SLC27A2//C…
GO:0003824	catalytic activity	Molecular function	202	5334	468	15325	1.24009	8.75278e-05	0.00741599	4.05785	GNAO1//GNAS//RAB7A//GNA14//GTPBP4//GNL2//DIRAS2//RHOU//TUBB8//IP6K2//BLMH//CTSL2//TINAG//AKR1C4//AKR1C3//RFC1//RFC2//DDX5//DDX24//PPIF//PDIA5//VPS4B//DCTN2//MYO19//SMC3//KIF20A//KIF21A//CFB//TOR1A//PRSS23//C1RL//KLK15//ATP1A1//AMPD3//CTPS//DNMT3A//POLD3//POLQ//TOP2B//PARP2//NDUFV1//RCL1//UGGT2//XRCC5//DDX23//ABCC4//ATP8B1//AHCYL1//ALDH9A1//AKR1C1//CDC6//SPG7//AFG3L2//MCM8//SULT1A1//C20ORF3//GOT2/…
GO:0005488	binding	Molecular function	394	11840	468	15325	1.08968	0.000103801	0.00806185	3.9838	TOR1A//HSPA9//HSP90AB1//SPG7//DNAJC7//AFG3L2//DNAJC22//NSUN2//SOAT1//ATP1A1//BUB1//BUB1B//CDC6//CKB//CTPS//DDX5//ERBB3//GCLC//GNAO1//GNAS//GSS//HCK//HNRNPA2B1//HNRNPD//JAK1//MARK3//MCM3//MAP3K5//MTHFD1//HNRNPM//NCL//SEPT2//NONO//CNOT4//PCCB//ATP8B1//PIK3CB//PI4KB//PKM2//PRKAG1//MAPK1//MAPK6//MAP2K6//QARS//RET//RFC1//RFC2//RYK//SMARCA4//AURKA//TOP2B//UBE2G2//XRCC5//RAB7A//BRAP//SMC3//AURKB//NOLC1/…
GO:0042162	telomeric DNA binding	Molecular function	4	15	468	15325	8.73219	0.000896448	0.0642684	3.04747	XRCC5//HNRNPA2B1//HNRNPD//NCL
GO:0008565	protein transporter activity	Molecular function	9	91	468	15325	3.23859	0.00182712	0.121634	2.73823	CSE1L//AZGP1//SEC61A1//VLDLR//AP2A2//RAMP3//AP4S1//COG2//ARFGAP3
GO:0017111	nucleoside-triphosphatase activity	Molecular function	38	761	468	15325	1.63513	0.00200705	0.124705	2.69744	GNAO1//GNAS//RAB7A//GNA14//GTPBP4//GNL2//DIRAS2//RHOU//TUBB8//RFC1//RFC2//DDX5//DDX24//VPS4B//DCTN2//MYO19//SMC3//KIF20A//KIF21A//TOP2B//XRCC5//DDX23//ABCC4//ATP8B1//MCM3//SMARCA4//POLQ//ASCC3//DHX36//ATP2C2//ATP1A1//BPTF//MLH1//ABCA10//CDC6//SPG7//AFG3L2//MCM8
GO:0016787	hydrolase activity	Molecular function	94	2339	468	15325	1.31599	0.0026289	0.153134	2.58023	GNAO1//GNAS//RAB7A//GNA14//GTPBP4//GNL2//DIRAS2//RHOU//TUBB8//BLMH//CTSL2//TINAG//RFC1//RFC2//DDX5//DDX24//VPS4B//DCTN2//MYO19//SMC3//KIF20A//KIF21A//CFB//TOR1A//PRSS23//C1RL//KLK15//ATP1A1//AMPD3//TOP2B//XRCC5//DDX23//ABCC4//ATP8B1//AHCYL1//CDC6//SPG7//AFG3L2//MCM8//C20ORF3//PDE8A//ADAM10//APH1A//DPP9//PRCP//SCPEP1//CAPN9//USP4//USP10//ESPL1//BRCC3//MMP11//UQCRC1//ADAM30//ADAMTS19//TASP1//MCM3//…
GO:0001191	RNA polymerase II transcription factor binding transcription factor activity involved in negative regulation of transcription	Molecular function	4	20	468	15325	6.54915	0.00281929	0.154563	2.54986	HDAC1//SOX3//ZMYND8//SPEN
GO:0016462	pyrophosphatase activity	Molecular function	38	788	468	15325	1.57911	0.00363215	0.181191	2.43984	GNAO1//GNAS//RAB7A//GNA14//GTPBP4//GNL2//DIRAS2//RHOU//TUBB8//RFC1//RFC2//DDX5//DDX24//VPS4B//DCTN2//MYO19//SMC3//KIF20A//KIF21A//TOP2B//XRCC5//DDX23//ABCC4//ATP8B1//CDC6//SPG7//AFG3L2//MCM8//MCM3//SMARCA4//POLQ//ASCC3//DHX36//ATP2C2//ATP1A1//BPTF//MLH1//ABCA10
GO:0016818	hydrolase activity, acting on acid anhydrides, in phosphorus-containing anhydrides	Molecular function	38	791	468	15325	1.57312	0.00386825	0.181191	2.41249	GNAO1//GNAS//RAB7A//GNA14//GTPBP4//GNL2//DIRAS2//RHOU//TUBB8//RFC1//RFC2//DDX5//DDX24//VPS4B//DCTN2//MYO19//SMC3//KIF20A//KIF21A//TOP2B//XRCC5//DDX23//ABCC4//ATP8B1//CDC6//SPG7//AFG3L2//MCM8//MCM3//SMARCA4//POLQ//ASCC3//DHX36//ATP2C2//ATP1A1//BPTF//MLH1//ABCA10
GO:0043560	insulin receptor substrate binding	Molecular function	3	11	468	15325	8.93065	0.00388822	0.181191	2.41025	IL4R//PIK3CB//PIK3R1
GO:0016817	hydrolase activity, acting on acid anhydrides	Molecular function	38	794	468	15325	1.56718	0.00411735	0.182732	2.38538	GNAO1//GNAS//RAB7A//GNA14//GTPBP4//GNL2//DIRAS2//RHOU//TUBB8//RFC1//RFC2//DDX5//DDX24//VPS4B//DCTN2//MYO19//SMC3//KIF20A//KIF21A//TOP2B//XRCC5//DDX23//ABCC4//ATP8B1//CDC6//SPG7//AFG3L2//MCM8//MCM3//SMARCA4//POLQ//ASCC3//DHX36//ATP2C2//ATP1A1//BPTF//MLH1//ABCA10
GO:0008094	DNA-dependent ATPase activity	Molecular function	7	72	468	15325	3.18361	0.00631077	0.267347	2.19992	RFC1//RFC2//TOP2B//XRCC5//POLQ//BPTF//SMARCA4
GO:0042623	ATPase activity, coupled	Molecular function	17	285	468	15325	1.95325	0.00675551	0.273745	2.17034	RFC1//RFC2//TOP2B//XRCC5//DDX23//DDX24//ABCC4//ATP8B1//ATP2C2//ATP1A1//DDX5//POLQ//ASCC3//DHX36//BPTF//SMARCA4//VPS4B
GO:0017137	Rab GTPase binding	Molecular function	5	42	468	15325	3.8983	0.00872055	0.338648	2.05946	RAB3GAP1//SYTL2//ALS2//MLPH//SYTL4
GO:0001106	RNA polymerase II transcription corepressor activity	Molecular function	3	15	468	15325	6.54915	0.009792	0.365046	2.00913	HDAC1//SOX3//ZMYND8
GO:0002039	p53 binding	Molecular function	5	45	468	15325	3.63841	0.0116281	0.405722	1.93449	MUC1//SMARCA4//SMARCB1//USP10//EHMT1
GO:0019899	enzyme binding	Molecular function	42	959	468	15325	1.43412	0.0117537	0.405722	1.92982	CSTA//SERPINB6//DUSP2//ADD3//TOP2B//RAB3GAP1//SYTL2//ALS2//MLPH//SYTL4//CDC6//PPP2R5A//ADAM10//HIF1A//MAP3K5//PRKAB2//PRKAG1//MAP2K6//AURKA//AKAP1//SKAP1//PRC1//KIF20A//CHEK2//MAPK1//PIK3R1//ANAPC5//TXNIP//CDK5RAP2//HDAC1//NRIP1//HEY2//ARFIP2//SMG5//HSPA9//MDM4//PGR//PPP1R3C//NCOA1//VAPB//PIAS3//LUC7L2
GO:0016773	phosphotransferase activity, alcohol group as acceptor	Molecular function	34	746	468	15325	1.49243	0.0130306	0.424891	1.88504	PI4KB//BUB1//BUB1B//MAP3K5//AURKA//PACSIN1//HSP90AB1//MARK3//MAPK1//MAPK6//MAP2K6//AURKB//SPEG//CHEK2//STK38L//PASK//OBSCN//TTBK1//PRKAB2//PRKAG1//EIF2AK1//HCK//JAK1//RET//SCYL1//ERBB3//RYK//PKM2//EFNB3//IP6K2//PIK3CB//PIK3R1//UCKL1//UCK1
GO:0016772	transferase activity, transferring phosphorus-containing groups	Molecular function	41	942	468	15325	1.42524	0.0139955	0.424891	1.85401	IP6K2//POLD3//POLQ//CKB//PI4KB//PAPOLA//BUB1//BUB1B//MAP3K5//AURKA//PACSIN1//HSP90AB1//MARK3//MAPK1//MAPK6//MAP2K6//AURKB//SPEG//CHEK2//STK38L//PASK//OBSCN//TTBK1//PRKAB2//PRKAG1//EIF2AK1//HCK//JAK1//RET//SCYL1//ERBB3//RYK//PKM2//UCKL1//UCK1//EFNB3//PIK3CB//PIK3R1//ZMYND8//ZCCHC11//PIGG
GO:0019900	kinase binding	Molecular function	19	358	468	15325	1.7379	0.0141793	0.424891	1.84834	DUSP2//ADD3//TOP2B//ADAM10//HIF1A//MAP3K5//PRKAB2//PRKAG1//MAP2K6//AURKA//AKAP1//SKAP1//PRC1//KIF20A//CHEK2//MAPK1//CDK5RAP2//CDC6//PPP2R5A
GO:0016887	ATPase activity	Molecular function	19	359	468	15325	1.73306	0.0145633	0.424891	1.83674	RFC1//RFC2//VPS4B//TOP2B//XRCC5//DDX23//DDX24//ABCC4//ATP8B1//ATP2C2//ATP1A1//DDX5//POLQ//ASCC3//DHX36//BPTF//SMARCA4//MLH1//ABCA10
GO:0016740	transferase activity	Molecular function	70	1777	468	15325	1.28993	0.0149339	0.424891	1.82583	IP6K2//DNMT3A//POLD3//POLQ//PARP2//UGGT2//SULT1A1//GOT2//CKB//SHMT1//TADA2A//NCOA1//HMGCS2//PI4KB//UMPS//PAPOLA//GALNT4//BUB1//BUB1B//MAP3K5//AURKA//PACSIN1//HSP90AB1//MARK3//MAPK1//MAPK6//MAP2K6//AURKB//SPEG//CHEK2//STK38L//PASK//OBSCN//TTBK1//PRKAB2//PRKAG1//EIF2AK1//HCK//JAK1//RET//SCYL1//ERBB3//RYK//PKM2//SOAT1//UCKL1//UCK1//EFNB3//CHST1//SULT1C4//HS3ST5//GAMT//WHSC1//NSUN2//MEPCE//EHMT1//ASM…
GO:0005085	guanyl-nucleotide exchange factor activity	Molecular function	11	171	468	15325	2.10645	0.0160034	0.424891	1.79579	GBF1//ALS2//TIAM1//ARHGEF5//FARP1//NET1//OBSCN//EIF2B1//GNAS//EIF2B5//GNA14
GO:0019901	protein kinase binding	Molecular function	17	313	468	15325	1.77852	0.0160586	0.424891	1.79429	DUSP2//ADD3//TOP2B//MAPK1//CDK5RAP2//ADAM10//HIF1A//MAP3K5//PRKAB2//PRKAG1//MAP2K6//AURKA//AKAP1//SKAP1//PRC1//KIF20A//CHEK2
GO:0016301	kinase activity	Molecular function	36	813	468	15325	1.45	0.0162557	0.424891	1.78899	CKB//PI4KB//BUB1//BUB1B//MAP3K5//AURKA//PACSIN1//HSP90AB1//MARK3//MAPK1//MAPK6//MAP2K6//AURKB//SPEG//CHEK2//STK38L//PASK//OBSCN//TTBK1//PRKAB2//PRKAG1//EIF2AK1//HCK//JAK1//RET//SCYL1//ERBB3//RYK//PKM2//UCKL1//UCK1//EFNB3//IP6K2//PIK3CB//PIK3R1//ZMYND8
GO:0004033	aldo-keto reductase (NADP) activity	Molecular function	3	18	468	15325	5.45762	0.0164121	0.424891	1.78484	AKR1C1//AKR1C3//AKR1C4
GO:0005545	1-phosphatidylinositol binding	Molecular function	3	21	468	15325	4.67796	0.0250084	0.611539	1.60191	PIK3R1//PICALM//PLEKHA5
GO:0005089	Rho guanyl-nucleotide exchange factor activity	Molecular function	6	75	468	15325	2.61966	0.0269121	0.611539	1.57005	ALS2//TIAM1//ARHGEF5//FARP1//NET1//OBSCN
GO:0001948	glycoprotein binding	Molecular function	5	56	468	15325	2.92373	0.0277345	0.611539	1.55698	AGR3//GPC6//GPC2//VLDLR//OS9
GO:0050681	androgen receptor binding	Molecular function	4	38	468	15325	3.44692	0.0279425	0.611539	1.55374	DDX5//SMARCA4//NRIP1//NCOA1
GO:0031683	G-protein beta/gamma-subunit complex binding	Molecular function	3	22	468	15325	4.46533	0.0283167	0.611539	1.54796	GNAO1//GNAS//GNA14
GO:0019902	phosphatase binding	Molecular function	7	98	468	15325	2.33898	0.0303708	0.611539	1.51754	MAP3K5//PIK3R1//ANAPC5//AKAP1//SMG5//MAPK1//SYTL2
GO:0003682	chromatin binding	Molecular function	13	237	468	15325	1.79618	0.030447	0.611539	1.51646	FOXC1//CDC6//DNMT3A//RPA1//SIX1//TOP2B//TTF1//PARG//NCOA1//H2AFY//SF3B1//SUZ12//KLHDC3
GO:0042826	histone deacetylase binding	Molecular function	5	58	468	15325	2.82291	0.0316813	0.611539	1.4992	HDAC1//HIF1A//TOP2B//NRIP1//HEY2
GO:0008134	transcription factor binding	Molecular function	19	391	468	15325	1.59122	0.0317711	0.611539	1.49797	SPEN//NHLH2//HEY2//TRIP12//SMARCA4//SMARCB1//HDAC1//NRIP1//ZMYND8//BCL3//E2F2//BPTF//FOXC1//FOXD4//HIF1A//FOXK2//MAPK1//NOLC1//HDAC8
GO:0016628	oxidoreductase activity, acting on the CH-CH group of donors, NAD or NADP as acceptor	Molecular function	3	23	468	15325	4.27118	0.0318452	0.611539	1.49696	DPYD//AKR1C1//AKR1C3
GO:0016903	oxidoreductase activity, acting on the aldehyde or oxo group of donors	Molecular function	4	40	468	15325	3.27457	0.0330003	0.611539	1.48148	AKR1C4//AKR1C3//ALDH9A1//DHTKD1
GO:0070011	peptidase activity, acting on L-amino acid peptides	Molecular function	25	553	468	15325	1.48037	0.0331269	0.611539	1.47982	BLMH//CTSL2//TINAG//CFB//TOR1A//PRSS23//C1RL//KLK15//ADAM10//APH1A//DPP9//PRCP//SCPEP1//CAPN9//USP4//USP10//ESPL1//MMP11//SPG7//UQCRC1//AFG3L2//ADAM30//ADAMTS19//BRCC3//TASP1
GO:0004386	helicase activity	Molecular function	9	146	468	15325	2.01857	0.0351981	0.611539	1.45348	DDX5//DDX24//XRCC5//DDX23//POLQ//ASCC3//DHX36//MCM3//SMARCA4
GO:0033764	steroid dehydrogenase activity, acting on the CH-OH group of donors, NAD or NADP as acceptor	Molecular function	3	24	468	15325	4.09322	0.0355923	0.611539	1.44864	AKR1C3//AKR1C1//AKR1C4
GO:0019206	nucleoside kinase activity	Molecular function	2	10	468	15325	6.54915	0.0356026	0.611539	1.44852	UCKL1//UCK1
GO:0043395	heparan sulfate proteoglycan binding	Molecular function	2	10	468	15325	6.54915	0.0356026	0.611539	1.44852	GPC6//GPC2
GO:0003697	single-stranded DNA binding	Molecular function	5	61	468	15325	2.68408	0.03823	0.611539	1.4176	HNRNPA2B1//ERCC5//MLH1//RPA1//SPEN
GO:0017147	Wnt-protein binding	Molecular function	3	25	468	15325	3.92949	0.0395558	0.611539	1.40279	RYK//FZD4//FZD8
GO:0004175	endopeptidase activity	Molecular function	18	376	468	15325	1.56761	0.0406347	0.611539	1.3911	BLMH//CTSL2//TINAG//CFB//TOR1A//PRSS23//C1RL//KLK15//APH1A//CAPN9//ADAM10//MMP11//SPG7//UQCRC1//AFG3L2//ADAM30//ADAMTS19//TASP1
GO:0004222	metalloendopeptidase activity	Molecular function	7	105	468	15325	2.18305	0.0418126	0.611539	1.37869	ADAM10//MMP11//SPG7//UQCRC1//AFG3L2//ADAM30//ADAMTS19
GO:0008081	phosphoric diester hydrolase activity	Molecular function	7	105	468	15325	2.18305	0.0418126	0.611539	1.37869	PDE8A//CHRM1//GNAO1//PLCB4//GNA14//SMPDL3B//GDPD1
GO:0005487	nucleocytoplasmic transporter activity	Molecular function	2	11	468	15325	5.95377	0.0426503	0.611539	1.37008	NUP133//UPF3B
GO:0030296	protein tyrosine kinase activator activity	Molecular function	2	11	468	15325	5.95377	0.0426503	0.611539	1.37008	NRG1//ERBB3
GO:0031078	histone deacetylase activity (H3-K14 specific)	Molecular function	2	11	468	15325	5.95377	0.0426503	0.611539	1.37008	HDAC1//HDAC8
GO:0032041	NAD-dependent histone deacetylase activity (H3-K14 specific)	Molecular function	2	11	468	15325	5.95377	0.0426503	0.611539	1.37008	HDAC1//HDAC8
GO:0034739	histone deacetylase activity (H4-K16 specific)	Molecular function	2	11	468	15325	5.95377	0.0426503	0.611539	1.37008	HDAC1//HDAC8
GO:0046934	phosphatidylinositol-4,5-bisphosphate 3-kinase activity	Molecular function	2	11	468	15325	5.95377	0.0426503	0.611539	1.37008	PIK3CB//PIK3R1
GO:0046970	NAD-dependent histone deacetylase activity (H4-K16 specific)	Molecular function	2	11	468	15325	5.95377	0.0426503	0.611539	1.37008	HDAC1//HDAC8
GO:0052813	phosphatidylinositol bisphosphate kinase activity	Molecular function	2	11	468	15325	5.95377	0.0426503	0.611539	1.37008	PIK3CB//PIK3R1
GO:0031406	carboxylic acid binding	Molecular function	10	176	468	15325	1.86055	0.0438997	0.619917	1.35754	SOAT1//CYP26B1//AZGP1//FOLR1//SLC19A2//GSS//GCLC//SHMT1//PLOD2//AKR1C1
GO:0008233	peptidase activity	Molecular function	25	572	468	15325	1.43119	0.0463082	0.640474	1.33434	BLMH//CTSL2//TINAG//CFB//TOR1A//PRSS23//C1RL//KLK15//ADAM10//APH1A//DPP9//PRCP//SCPEP1//CAPN9//USP4//USP10//ESPL1//MMP11//SPG7//UQCRC1//AFG3L2//ADAM30//ADAMTS19//BRCC3//TASP1
GO:0004672	protein kinase activity	Molecular function	27	628	468	15325	1.40786	0.0467299	0.640474	1.33041	BUB1//BUB1B//HSP90AB1//MARK3//MAP3K5//MAPK1//MAPK6//MAP2K6//AURKA//AURKB//SPEG//CHEK2//STK38L//PASK//OBSCN//TTBK1//PRKAB2//PRKAG1//EIF2AK1//HCK//JAK1//RET//SCYL1//ERBB3//RYK//EFNB3//PACSIN1
GO:0019903	protein phosphatase binding	Molecular function	5	65	468	15325	2.5189	0.0481602	0.64646	1.31731	AKAP1//SMG5//MAP3K5//PIK3R1//ANAPC5
