# Supplementary material for: The Role of PinX1 in Growth Control of Breast Cancer Cells and Its Potential Molecular Mechanism by mRNA and lncRNA Expression Profiles Screening
Source: Biomed Res Int. 2014 Feb 3;2014:978984. doi: 10.1155/2014/978984 (PMC3929369; doi:10.1155/2014/978984)
Supplement: Supplementary file 1 — Human LncRNA Array V2.0 was applied for screening the alterations of lncRNA and mRNA expression profile between PinX1 overexpressed and control MCF-7 cells. After the quantile normalization and data filtering steps, the mRNA expression profile data qualified for fold-change comparison was listed in Tables S1, and lncRNA expression profile data was listed in Table S2. The differentially expressed mRNAs was listed in Tables S3 and differentially expressed lncRNAs was listed in Tables S4. GO analysis of the differentially expressed mRNAs by biological processes, cellular components and molecular functions was showed in Table S5. Profiling data of enhancer-like lncRNAs was listed in Table S6. The enhancer-like lncRNAs and their adjacent coding gene pairs was listed in Table S7. Profiling data of the Rinn lincRNAs was listed in Table S8. The Rinn lincRNAs and their adjacent coding gene pairs was listed in Table S9. Profiling data of the Hox clusters was listed in Table S10. [file 978984.f1.zip › 978984.f1/Table S6.xls]

## Sheet: Enhancer LncRNAs profiling
Enhancer LncRNAs profiling (Entities where at least 2 out of 2 samples have flags in Present or Marginal). This table contains profiling data of all probes for LncRNAs with enhancer-like function (Harrow, Denoeud et al. 2006). # Column A: ProbeName, it represents the probe name. # Column B ~ C: Raw Intensity of each sample. # Column D ~ E: Normalized Intensity of each sample (log2 transformed). #…
	Raw Intensity		Normalized Intensity		Annotations
ProbeName	[Empty Vector](raw)	[pcDNA3.1-PinX1](raw)	[Empty Vector](normalized)	[pcDNA3.1-PinX1](normalized)	type	seqname	GeneSymbol	source	RNAlength	chrom	strand	txStart	txEnd	Xhyb	probeSeq
ASHG19A3A032313	264.086	100.88	7.96243	6.7296	noncoding	ENST00000435810	RP11-252P19.1	Ensembl	1122	chr6	+	166167676	166189268		GAAACATCTTCCCAGAAAACAGACTACAACAAATCATTTCCCTGGTATGAAGGAATGAAG
ASHG19A3A031964	130.436	151.525	6.9469	7.32783	noncoding	ENST00000415883	RP11-346D19.1	Ensembl	597	chr6	+	113852319	113864995		CCCTGCTGTCTTTATATGTACAACTTGCATTTTGCAAGAGTTTAGAAAGTTGTAACCTTA
ASHG19A3A044751	211.303	152.864	7.64134	7.33989	noncoding	ENST00000449749	AC068580.7	Ensembl	338	chr11	-	1798159	1799618		AAATGGCAGCGTTGTGGGTAAAATAACACCTCCTTCAGAGACATTGACATCCTCATCCCT
ASHG19A3A031389	924.584	1242.91	9.76375	10.367	noncoding	ENST00000429998	RP11-513I15.6	Ensembl	4785	chr6	+	34247481	34252266		GCCCTTGATATTAGAGAATATTAAAATCACACAGTTGTGGCAAAAATCACATTGTGGCTA
ASHG19A3A032510	279.967	306.732	8.04436	8.35342	noncoding	ENST00000451792	AC017060.1	Ensembl	442	chr7	-	17503068	17598533		AATTATTTCTGAACCTTCCCATCAGCCTTGTCTCTGATAGAATTGGCCTGTTGTGGACGG
ASHG19A3A042659	286.913	79.5306	8.07999	6.39102	noncoding	ENST00000431395	RP11-124O11.2	Ensembl	500	chr10	-	43474464	43476955		CCCAGGTAGGAACTGCAGCTATTTTTAAACTGAGATTTCCTACAAATTAAAATTGCTTTG
ASHG19A3A034043	106.82	101.61	6.66749	6.74057	noncoding	ENST00000439823	AC002480.4	Ensembl	557	chr7	+	22629323	22631241		CAGTTCCTATGATATGACTACCTCAGGGCAAGAAAGTCACTGTGTCCCTGCTACAACAAA
ASHG19A3A040083	263.415	449.897	7.95915	8.91074	noncoding	uc004ebr.1	AK057701	UCSC_knowngene	2597	chrX	-	73498208	73512435		ATCCCACTTGACAGTTTAGAAGTGGATTGATAATACTCTTCTGGCTTAAAACCCTTCTTC
ASHG19A3A018856	288.524	336.85	8.08832	8.48447	noncoding	ENST00000457669	AP000696.2	Ensembl	1133	chr21	-	38004978	38009331		ATGGGTTTATCTTTTGGGACCAAGACATTGGGTCCCTACATGTTTTCCCCTACCCTTCTT
ASHG19A3A018364	367.041	437.256	8.42964	8.8694	noncoding	ENST00000461248	RP1-300I2.2	Ensembl	556	chr20	+	43859508	43861972		TTATGAAGCTGAGCGGCTTCTTTCTACTCTCTGTGAACATCCTCCTTTGCCTCTGAATGA
ASHG19A3A029234	169.735	110.094	7.32251	6.86062	noncoding	ENST00000428930	BX571672.1	Ensembl	614	chr1	+	143119060	143232318	ENST00000443548,	TCATTCCAAGATTCCTTAAAATTCTGTAATTCTATGTCCTCTTGATTCTGTCTATAGAAA
ASHG19A3A030631	1391.51	1546.78	10.3546	10.6761	noncoding	NR_027311	LOC153910	RefSeq_NR	2290	chr6	-	142847591	142958973		AAGGTCTTAGCACTGTTTCATCTTCCCAGAAGGCTTTTCCCTCTTCCACCCTGCTTCTAG
ASHG19A3A037844	70.7164	126.689	6.06577	7.07	noncoding	ENST00000457720	RP11-217B7.3	Ensembl	606	chr9	-	107753076	107754062		TTTTTAACTGGCAAGGTTTCGAGTTCCCAACCACAGCACCCTCAGTGATGGTTTTCAGAA
ASHG19A3A052493	91.7824	66.9112	6.44638	6.14297	noncoding	ENST00000400817	AC103965.1	Ensembl	2545	chr15	-	84868063	84898722		GTGTGTCCTTGCATGGCCTATGAAGTGTGTTGTGGGATAACCGTGTGTATTGAACTCTCA
ASHG19A3A043572	554.234	529.709	9.01734	9.14576	noncoding	ENST00000417112	RP11-554I8.2	Ensembl	917	chr10	+	6779343	6780988		TGACTTTTGGAAATCTGATTGACTGGCACACTCTCTCTGCCTCTTTCTTTCTCAACATTT
ASHG19A3A018483	118.142	87.0324	6.80657	6.51567	noncoding	ENST00000366097	RP11-560A15.3	Ensembl	770	chr20	+	55689970	55697148		TCAGGTGGAGTCTGTGGTTCCCATGGTTCCTAGAGTGAGGACTCATCCTGCCAGATGGAG
ASHG19A3A015510	127.829	101.034	6.91877	6.73173	noncoding	ENST00000453451	AC012593.1	Ensembl	580	chr2	+	35024916	35388178		CTTTTCTGACCACGGTTTTCTGGAGTTTTTTCGTATGGAGTTTGTAAGCTTCCTGACATG
ASHG19A3A029430	295.104	246.513	8.11981	8.02898	noncoding	ENST00000455973	RP11-359N11.1	Ensembl	470	chr6	-	14230005	14231801		TAGGCTCTGCAAATTTCATCCCCACCTTTGGCCCTTCAGGCCTAGGGCAAGTCACAGCTC
ASHG19A3A012293	237.283	254.631	7.80525	8.07667	noncoding	ENST00000435973	RP11-286M16.1	Ensembl	385	chr1	-	230011296	230021499		TAAGAAGAATAACTCCCATTCCTCATGCATGAGACCCTCTGCTAAATGCTTCCTGTGCAC
ASHG19A3A049628	143.326	106.381	7.07764	6.81136	noncoding	ENST00000439454	RP11-527N12.1	Ensembl	348	chr13	-	63757233	63801189		GCCTTTGCTACTCCTTGCTGACATTTGGAATTTAACTGAAGTGTCTTGTTAAAAAACATT
ASHG19A3A016139	91.5019	118.219	6.44127	6.96679	noncoding	ENST00000427208	AC019100.5	Ensembl	1875	chr2	+	108938693	108970255		ATATTGAGAAAAGCAGGCGCGCTTCCATTCAACTTCAACACCCTTTCCTGGAGTGGATAA
ASHG19A3A014203	969.562	1053.86	9.83284	10.123	noncoding	NR_015395	LOC541471	RefSeq_NR	809	chr2	-	112124590	112252692		TTATAAATCTTCAATACATCCTGTCCCCCTAAAACGGCATCTGGGTCTTTTGAGGGTTAA
ASHG19A3A000365	58.3263	68.9485	5.78222	6.18748	noncoding	ENST00000456100	AL163953.3	Ensembl	562	chr14	+	53684429	54153976		AGCATGTTGTCACCTCTCAATACATAAAACTACTGGAGGGTGGTTCCAAGATGGCCAAAT
ASHG19A3A040079	430.637	348.82	8.65761	8.53618	noncoding	NR_028379	NCRNA00182	RefSeq_NR	2356	chrX	-	73247970	73513409		GCTTCCTTCTGTAAAATTTGGACTGTTTGTTCTTCCCATTATATTAATAGTTGCTTCAGG
ASHG19A3A018524	111.928	143.675	6.73296	7.24756	noncoding	uc010gjw.1	AK309218	UCSC_knowngene	3684	chr20	+	58713536	59228976		GAGAAAAGACGTCCTTGCTGTGTTCCTGATATGAAGAGGAAAGCAGTCCTTCTCCATTAA
ASHG19A3A036232	483.664	427.354	8.82384	8.83526	noncoding	ENST00000435492	RP11-317P15.3	Ensembl	259	chr1	+	182681996	182683679		AAGCTCCCACTAACACCTTACCACTCTCTACCATGTCAACTTATTTTATTATAACAATTG
ASHG19A3A049685	216.813	251.409	7.67741	8.05846	noncoding	ENST00000452933	RP11-318G21.2	Ensembl	546	chr13	-	78563506	78564781		CCTTTTTCCAAACTATAGCATAAATCACAGAAAAGTATCTCCTCATTTGTTTGGGATGAG
ASHG19A3A038303	111.024	119.339	6.72069	6.98069	noncoding	ENST00000445631	RP11-91N2.3	Ensembl	206	chr9	+	2541096	2541635		CTCTGAAAGAATCCAGTTATGGGAACACAAATTACCTCATCCTCAGTTTCACTTTAAAAT
ASHG19A3A018723	69.814	72.1022	6.04698	6.25112	noncoding	ENST00000433310	AF131217.1	Ensembl	900	chr21	-	29816869	30047170		TTGTGGAGTAAGTGAGTGGGCCTGAGTTGAGAAGATCCTGGCCTTGGATTTTAAAACTGT
ASHG19A3A029872	10446.9	10369.9	13.2827	13.4126	noncoding	ENST00000444731	RP11-552E20.1	Ensembl	539	chr6	-	40239304	40243976		AGGCTGTGTCTCCCTCCTCAGACTGAAGGATCTTTGTGATCAGATGCTGTGTCTATATCC
ASHG19A3A025660	661.629	706.754	9.27831	9.5523	noncoding	ENST00000432395	RP5-943J3.1	Ensembl	509	chr1	+	90254472	90256051		ATGAAGTTTTGCCATGAACGTAGATCCTCCCTTACAAATCCCTCCATTTTCAAACCCGAG
ASHG19A3A049938	112.317	123.147	6.73762	7.02851	noncoding	ENST00000445646	RP11-363G2.4	Ensembl	533	chr13	+	23426134	23426991		TGGTGTTGGGGGCAATAGGTTTGTGAATATTCTGTGGATATGTCCATGCATAGGTGTATA
ASHG19A3A030636	149.707	154.603	7.14476	7.35625	noncoding	ENST00000454588	RP1-45I4.3	Ensembl	552	chr6	-	143360561	143363461		GGTCCAAGTCAATCATCTTTGCTTCTCTCACATTGTCATCGACATTTACCCCAGCATTAT
ASHG19A3A029808	169.205	105.41	7.31736	6.79657	noncoding	AK026168		NRED	2638	chr6	-	34247460	34250085		AGCTAAAGCAGTGACAGATCCACGTAGCCTCTTTAACCTCTTTATTATCTTGCCAAAAAA
ASHG19A3A032328	140.67	115.203	7.05242	6.92705	noncoding	ENST00000455390	RP11-514O12.2	Ensembl	627	chr6	+	167317185	167318323		TTGCGGTTTCTTCCTTGCTCCTTGCAGGTTATATTTGAAATGAATGTCAGAGCCATGCGG
ASHG19A3A048980	194.071	159.116	7.51671	7.39805	noncoding	uc001dva.2	BC043293	UCSC_knowngene	1824	chr1	-	106144775	106161557		ATCGTCTGCTCCAGACAACAGCCTTTCCCTAGTTTATACCATTAACATTTTATTAATGGT
ASHG19A3A014428	114.221	89.82	6.75976	6.55919	noncoding	ENST00000417715	AC073928.2	Ensembl	444	chr2	-	140861151	140889349		AACCTGAACAGTCTGCTGAAGCACCTGATGTTTGGCCTTCCTGAATGTCATGTAATACGT
ASHG19A3A023200	219.566	392.355	7.69589	8.70768	noncoding	ENST00000419531	RP4-794H19.2	Ensembl	2273	chr1	+	59250831	59366668		CCAATTCTGATCACTGCTCTTATGGTTTGTAATACATTATTTTGGGTTTGGATGATCCTG
ASHG19A3A034004	599.842	927.991	9.13257	9.94091	noncoding	ENST00000419463	AC019117.1	Ensembl	837	chr7	+	17414490	17506288		ATAACATGAAGTGAAGTCTTCATCTCCATTCCCAACAGTCCCCATTCTACTTGCAGAAAG
ASHG19A3A030634	654.942	524.221	9.26191	9.12918	noncoding	ENST00000446115	RP11-439L18.3	Ensembl	783	chr6	-	143288169	143343090		GCAGCAACATCAGAAAGCCCCTCTGCTGTGCTTCAGGATCACTCTTATCACTGCATAAAG
ASHG19A3A038531	388.384	453.542	8.51193	8.92108	noncoding	BC042185		RNAdb	964	chr9	+	35646266	35647470		GGTTCCTCCTCTGTGGCTTCCTGTGGCACTCCAAGTGGGAAGAAGAGAAGCTTGGAAGTG
ASHG19A3A029809	1595.55	2385.9	10.5543	11.308	noncoding	AK025759		NRED	2209	chr6	-	34250999	34253191		GAGAAAATGATACCTCTCACCTTCAAATTAATCAAATAGTTTGTCCTTCTAGTCCCCTTA
ASHG19A3A041575	168.229	184.816	7.30882	7.61383	noncoding	ENST00000417443	NCRNA00086	Ensembl	2913	chrX	+	134555867	134559682	NR_024493,NR_024359,	AGACACTGACCGGAATGACATACTTTTCTGTGTGTGATTCACTGTGTACTGGTCAGCACA
ASHG19A3A039081	191.31	170.549	7.49583	7.49823	noncoding	ENST00000435485	RP11-308N19.1	Ensembl	1686	chr9	+	109040672	109367076		TGTGTCTTAAGCTGGGTCATTGAAGTGGAATGTTTTCACAAGACCTCCTCCACTTGCTAC
ASHG19A3A055059	80.1176	80.9313	6.24553	6.41557	noncoding	uc001alp.1	AK125078	UCSC_knowngene	847	chr1	-	5621768	5728315		TGGAAAAGAAAACCCCATTTCCAAGGCTCATAGGTGAAGAGACTTTTGCCTTGTCTGAGA
ASHG19A3A028350	83.6389	110.562	6.30673	6.86636	noncoding	ENST00000450213	PMCHL2	Ensembl	1917	chr5	+	70671612	70681621	NR_003921,ENST00000418902,	CCCTCCTTGGTTTACCTCCATCATTAAAAAACAACAATGACAACGACAACAAAAAACAAA
ASHG19A3A000151	143.736	121.721	7.08253	7.00998	noncoding	ENST00000421632	CDKN2BAS	Ensembl	678	chr9	+	22046749	22118701		ACACCCGGCGGATAGAGAGAATTTTGACAGATTGGCTTCTCTCACATGGCAAGAAACATT
ASHG19A3A013555	72.282	78.6028	6.09494	6.37502	noncoding	ENST00000457457	AC016735.1	Ensembl	400	chr2	-	43228461	43233380		AAAGATGTCACAGAGAGTAAAATGAGAAAAATCCAGTAGCCCGTGCCCAGAGCAGTTCCT
ASHG19A3A051092	573.929	423.836	9.0671	8.82145	noncoding	uc001eng.1	AX747132	UCSC_knowngene	1711	chr1	-	145372087	145373798	uc001els.1,	GAAAAATGTGTCTTCCTTAATTTTTCCCATAAGAACCACCCTACTTCATGCCCTGTCTCT
ASHG19A3A030800	269.982	294.855	7.99506	8.29228	noncoding	ENST00000434356	RP11-347L18.1	Ensembl	466	chr6	-	164767521	164769677		GAAGAGTCTTAAATGCCTTCTTTACCCTTTTACTCCATGTCCATGCAGTCTACCTGCTTT
ASHG19A3A050762	122.381	90.5326	6.85737	6.56932	noncoding	ENST00000450546	AL592494.1	Ensembl	426	chr1	-	121315743	121322322		GCAAAAACATGACTTTGCCAGCTTCTCTTACAATTTGTGAATCATACTTTTGAATGCCAA
ASHG19A3A000147	1656.97	1616.3	10.6059	10.7459	noncoding	ENST00000421181	AC080094.1	Ensembl	201	chr2	+	17151300	17155764		TAACCCTGATACTCCCATGTCTCAAAAGTTCTCATTCTTCTCCTTCCTGCTGCCACATGA
ASHG19A3A037201	241.962	164.954	7.83362	7.44895	noncoding	uc003zpr.2	CR627240	UCSC_knowngene	4804	chr9	-	23500689	23672385		GTCAAGTGACTCTTAGCTTGCGCTGTTGTCATCCTCTCTGGACTATTGCTACATTTCTAG
ASHG19A3A053272	161.014	150.639	7.25019	7.31994	noncoding	ENST00000423422	RP11-336K24.4	Ensembl	420	chr1	-	155955165	155976861		TGTCATCCATCTGCTGGCCCTTTGGACCACTCGGCCACTGGCATGCTTTCCAAGTCTGTA
ASHG19A3A024647	9706.35	12426.6	13.169	13.6719	noncoding	ENST00000441170	AC092661.2	Ensembl	1663	chr4	-	118495666	118497329		AGACATGGTGAATGCATCGACTGGAAGCTCCTTTTTCTCCACCTCTCTCAATACATTCCT
ASHG19A3A017439	90.9974	133.173	6.43205	7.13832	noncoding	ENST00000417696	RP11-23O13.1	Ensembl	390	chr20	-	20702316	20703034		GGTGGGAGCTGAAATCAAAGTATGCATTTGTATACATTCTCCTCAATCATCTGTCTCATG
ASHG19A3A015384	105.338	92.7548	6.64663	6.60708	noncoding	BC043238		misc_RNA	2474	chr2	+	23281094	23283550		AAATCAAGGGGCCTGTAAATATCACCCTCATACTAACTCTGTGAAGCAGCATTCACCCTG
ASHG19A3A019617	221.246	208.092	7.70675	7.78688	noncoding	ENST00000434510	CTA-796E4.4	Ensembl	357	chr22	-	26557875	26559180		CACTGCCATCCCCACCTATTAAAATAATGGCATGAAAAATAAACAGCCTTTATGTACAAT
ASHG19A3A012847	711.242	695.886	9.38469	9.53149	noncoding	ENST00000443207	RP4-580N22.2	Ensembl	190	chr1	-	236121178	236135125		CCCAAAAGAAGCTATGCTCGGGCCTTCCCATCGTCCCACTCAAGAGCTTTCTTCATATTG
ASHG19A3A039316	223.036	239.417	7.71691	7.98405	noncoding	ENST00000455981	RP11-344B5.2	Ensembl	583	chr9	+	132044736	132048007		GGAGGAGCATGTGATTCCAGACCCTCCTCTCTGCAACGAAAGTGAGGTTGACACCTGCAG
ASHG19A3A043527	132.008	141.039	6.96342	7.2207	noncoding	ENST00000445932	RP11-298E9.5	Ensembl	597	chr10	+	3266007	3269599		AATGTGTTTCCCAAGAAGCAAGTCTGGATTCATCTTATGTACACTCCTGGCCTGTCTCTG
ASHG19A3A039845	90.8937	99.4266	6.43074	6.70957	noncoding	ENST00000451396	RP11-478J18.2	Ensembl	476	chr1	+	214139236	214159496		ATGTAGGAAGCTTTGGATGATGTCTGCGTATCCTCAGAACAGTCTCCTAACCATTCCTCT
ASHG19A3A051793	249.329	237.114	7.87892	7.97017	noncoding	uc010awi.1	BC148240	UCSC_knowngene	557	chr14	+	101540363	101540920		TAAGATCCAGCCTTTGTCATTTACTGGTACTGTGGTTTTCTTGTATCTGGCCTCCACCTC
ASHG19A3A014121	117.763	121.355	6.8025	7.00549	noncoding	ENST00000431897	AC108051.1	Ensembl	437	chr2	-	103583865	103600887		GCAGCATTTGTGAAAATACCTCCCGATCATCTTTCACAGGAATTCTTTCCAAGTGAGAAA
ASHG19A3A040275	422.219	398.256	8.62779	8.72873	noncoding	uc001hmu.2	BC045735	UCSC_knowngene	959	chr1	+	221002596	221005768		AAAGCAAGGGCAGGTCTCTGTGCCCCATCTCTAGCTTTTCCTCAACTTAGGCTTTATAAA
ASHG19A3A000092	108.635	123.8	6.69098	7.03564	noncoding	ENST00000412422	RP4-562J12.2	Ensembl	2290	chrX	+	117973518	117991849	uc004eqv.2,	TAAAGTAATCCCTCTTTTTCCTGGGCTATACCATCTGGAACAGATGACTTCCAAGGACAC
ASHG19A3A039323	263.267	177.06	7.95832	7.55437	noncoding	uc004bxy.1	AK024177	UCSC_knowngene	1670	chr9	+	132251385	132275963		CCAGACACTGAACTGCCTTTGGAAGCAAGTAGGAGCAACAGCGAAGGTTTGCTGGCTCAG
ASHG19A3A016377	1310.29	314.452	10.2658	8.38759	noncoding	ENST00000431979	AC093838.7	Ensembl	3516	chr2	+	132394597	132407188		TTGCTTGAGAAAATCAGATAATTGCTTGAGAAAATTAGGACATTGCTTGAGGAAGTTAGG
ASHG19A3A013587	73.2946	65.6937	6.11549	6.11716	noncoding	ENST00000418415	AC016912.3	Ensembl	570	chr2	-	46619435	46621306		ACAAACAAACACAAACCCACTTTGCGTTCTGTGAGTGTGCATGTATGTTGGTCCCTAGGT
ASHG19A3A048979	152.928	213.119	7.17533	7.82181	noncoding	ENST00000420901	RP11-251P6.1	Ensembl	410	chr1	-	106132315	106161540		CTGAGGAAATATGCATTGATCTTGCAGTACTTTTCTCCTCCAAATAAAAGTCAGTATGAT
ASHG19A3A013307	121.212	66.8035	6.84173	6.14017	noncoding	ENST00000431117	AC008278.3	Ensembl	568	chr2	-	15808807	15820608		ATTAACTTGTTATTCTAAGTAATCCTCTGTTGAAAGCTGTGAGCCGCCTGGGGTGGACGA
ASHG19A3A045233	176.047	807.161	7.37526	9.74451	noncoding	ENST00000450983	RP4-669L17.2	Ensembl	607	chr1	-	453632	460480		CAATCCTGGGGCAGGGAGGGGAGGCCCAGCTGAGTTTGGATCATAATCCTGAAAGACACA
ASHG19A3A049555	67.1076	67.7067	5.98845	6.16056	noncoding	ENST00000425350	RP11-165D7.4	Ensembl	962	chr13	-	49151109	49152224		CCTTTCTTCCCATAGCTTCCAGCCTGGTGGGGAATAAAGGAATTAAATAAGCAATTACAA
ASHG19A3A039193	97.9856	77.8151	6.54346	6.36177	noncoding	ENST00000433572	RP11-542K23.7	Ensembl	830	chr9	+	125165685	125211256		AAAGAGGGAAAATGAAATCCTGGCCCTATGGATACTGGGAAGCATACTCAAGTATCTCTG
ASHG19A3A015714	129.14	139.927	6.93386	7.21029	noncoding	ENST00000416845	AC093159.1	Ensembl	424	chr2	+	62690261	62691205		ACAAGAGGTGCCATGAGACAGTATATAGTTCATTTCCCCACCGCAAGAGTAAAGGGCTTA
ASHG19A3A013359	91.3868	84.782	6.439	6.4802	noncoding	uc002ree.1	AK090620	UCSC_knowngene	2098	chr2	-	21910305	21933495		AAACCACATCTGATGTCATTCCAATCACTGTGTGTGTCTGCACTTGTGGGTTGTCTGCAT
ASHG19A3A044191	143.145	141.909	7.07578	7.22846	noncoding	ENST00000416657	RP11-36D19.8	Ensembl	339	chr10	+	82093526	82094182		GATGTCATCCAGCAACAGAAAGCTTGTCAAAATAGGAACCATTTCCATCCCTACCACTGG
ASHG19A3A053693	97.0868	88.0413	6.53005	6.53101	noncoding	ENST00000449345	RP11-85G21.1	Ensembl	399	chr1	-	157202020	157206926		GCTAATTTAGAAGTTCTAAGGTATTCTCCACCTGTAATCTATTGCTCCAGAATTCTGCAG
ASHG19A3A032628	6610.76	7598.7	12.6079	12.9652	noncoding	ENST00000454922	AC005154.5	Ensembl	752	chr7	-	30624315	30625588		GAAACGTAGTAAGTTTATGTTTTTAAGGTCTGCCCCTCCCTTCTTGCATTATATCATAAA
ASHG19A3A018032	361.314	476.627	8.40777	8.99256	noncoding	ENST00000415932	RP11-199O14.1	Ensembl	1484	chr20	+	6427369	6509106		ATAACCAACATGGTGCTCATTAATTGGTCATGTGAGCACTAAGGATAACCACCCTCCCCT
ASHG19A3A038650	296.363	246.412	8.12652	8.02791	noncoding	ENST00000419207	RP11-160N1.9	Ensembl	719	chr9	+	44823712	44835521	ENST00000513381,ENST00000441101,ENST00000432067,	AAGACAAAGCAAAGGTATGAAAGGAACACACATCCCTGACTGACTAGGAGGAACAGAGCT
ASHG19A3A035157	137.51	126.098	7.0195	7.06262	noncoding	AK057967		misc_RNA	1871	chr1	+	173389593	173391465		TTTCCAACGCTTTCCTTTCCAGCCTCACTTAGGCACATTGCAGTTAAAGAATATGGCCAC
ASHG19A3A042626	266.77	233.722	7.97801	7.95122	noncoding	ENST00000412439	RP11-810B23.1	Ensembl	187	chr10	-	36378013	36378317		TTCCTGGAACTTTACTTCGGCCTCTTTCCCTGTAATGTGAGACAGTCTGATACATCTGCA
ASHG19A3A049664	1234.51	1505.14	10.1843	10.6365	noncoding	ENST00000443621	RP11-30C8.2	Ensembl	282	chr13	-	73987609	74120978		TTGACAACTTGAGAACTGCGTTCAAGGAAAGTCTTTAACAATTCTCCTCCTCACCTCCAC
ASHG19A3A033216	282.047	313.14	8.05513	8.38059	noncoding	uc001fuu.2	AF088076	UCSC_knowngene	423	chr1	+	159931073	159946734	ENST00000423943,	TAAAAGGCCAAACCTTTGCTCCAACTTTCTCCTTAGCTTCCCTTTGGATCTGGAAAGCTG
ASHG19A3A055257	179.271	151.081	7.40123	7.32397	noncoding	uc004eqv.2	AK057519	UCSC_knowngene	2146	chrX	+	117973518	117991706	ENST00000412422,	CTAAAGTAATCCCTCTTTTTCCTGGCTATACCATCTGGAACAGATGACTTCCAAGGACAC
ASHG19A3A013239	240.766	229.981	7.82551	7.92858	noncoding	ENST00000448901	AC105253.1	Ensembl	4209	chr2	-	6506141	6515554		TGTACAGACATAGAGCCCTTTCCACTTCCTTTTTGTAAGAAATAGTATTCTTTCCCACAG
ASHG19A3A050297	161.548	139.866	7.25474	7.20959	noncoding	ENST00000419499	RP11-459P23.1	Ensembl	3340	chr13	+	74805593	74834113		AGGTCTGTCCTTTTTAATGCTCACCACACTTGAGGTTTCTGTTCACACTTCAAAGGCTGT
ASHG19A3A032192	87.7108	70.9524	6.37614	6.22768	noncoding	ENST00000446392	RP1-12G14.5	Ensembl	378	chr6	+	149882287	149885085		AGGAAAGACACCCTACACTCTGCTTCTGCTTCCAAGTGGAGGCTTCTTTCATTTCTAAAG
ASHG19A3A007980	1449.54	1376.89	10.4149	10.5138	noncoding	ENST00000367716	RP11-296O14.3	Ensembl	1815	chr1	-	173386931	173430501		CCTCCCACCCCCAGTTAAAAAGGTAATACACCTCATTGAAATAATTTAAACTTTACAGAA
ASHG19A3A044210	1554.94	1503.07	10.5165	10.6347	noncoding	ENST00000437892	RP11-124L5.7	Ensembl	674	chr10	+	86039746	86048751		ATCCAGCCCCCATTCCTCACTTTTGTCCTACTGGTAATAAGACATTCATCGTGTATCTTT
ASHG19A3A038094	20330.5	15447.8	14.2327	13.9879	noncoding	ENST00000428643	RP11-216B9.7	Ensembl	334	chr9	-	131425412	131425857		TTTGTCCCAGCCTGGGGCTCCCCCTCTGGTTTCCTATTTGTAGTTACTAGAATGAAAAAA
ASHG19A3A000076	16321.1	20187	13.9305	14.3782	noncoding	ENST00000398216	RP11-54O7.2	Ensembl	443	chr1	+	849550	850351		GCCAGACCCCCATCCCGCCAGGGTCACCAGctgggcatggtggcgcatgcctgtaatcct
ASHG19A3A018539	185.49	279.71	7.45259	8.21506	noncoding	ENST00000433121	RP5-908M14.5	Ensembl	477	chr20	+	61004603	61006568		TTGGGGTGAGCATGCTTCCTGCTGGATGCTTCTCTATGTAAGCACCTGCCTGAGTGTCAG
ASHG19A3A031571	161.698	186.856	7.25579	7.62838	noncoding	ENST00000455005	RP5-1120P11.3	Ensembl	1608	chr6	+	44041649	44045689		AAGTGATCACAAAATTTTCAACATCACAGTCTAAAATAAAAACCTGCCTCTTGTCTGCCT
ASHG19A3A041858	329.198	307.576	8.2767	8.35656	noncoding	ENST00000430921	RP11-66A2.1	Ensembl	372	chr1	+	232853816	232857996		TGCTCAGCAAACAGAGAGAGACTATTCTTGTTCCCTGTGCCTAGGATGTGCTTGATGTAT
ASHG19A3A040770	68.3889	72.7429	6.0178	6.26365	noncoding	uc001hpe.1	AK124056	UCSC_knowngene	1530	chr1	+	225888305	225939945		TGAAGAGCCTTTCTGCAGTTCTGCATTGAACTCTTCATGTGGCCCCATCTAGTAATGAGT
ASHG19A3A040046	281.845	222.547	8.05445	7.88064	noncoding	ENST00000422194	CXorf49B	Ensembl	697	chrX	-	70882844	70885603	NM_001145139,ENST00000440412,	GTCCATCCCCCAAGACCGGAAAGGCAGCAATAGCCCCCGGGAGCCCAGGGCTGTCCTCGG
ASHG19A3A038554	204.696	229.273	7.59373	7.9232	noncoding	ENST00000417311	RP11-84P7.2	Ensembl	504	chr9	+	36307038	36315276		GGTAGTTCCTACACAGCTTGATTTTCTTAACACTAACAGCAGTCTTCTGCCCTTCCAACA
ASHG19A3A039167	238.446	281.346	7.81215	8.22374	noncoding	ENST00000456032	RP11-127L21.1	Ensembl	256	chr9	+	121502840	121507590		AGGGTCAACTCAATAATATGTCTTTACAATCCCTTTTTCTCTGTCTCTAACTTCCTTCAG
ASHG19A3A030896	326.986	305.413	8.26783	8.34738	noncoding	ENST00000433761	RP1-40E16.2	Ensembl	398	chr6	+	3056123	3056995		ATTGGTTCATTCATTCGTTCATTTTGCTGTAACTCACAGTGGCCCCCATCCTAAGGTGCA
ASHG19A3A015174	115.834	136.649	6.77925	7.1758	noncoding	ENST00000441444	AC144525.1	Ensembl	592	chr2	-	239697288	239698357		ATGTCTGAACACTGGGACACCAGTTCTCCTCCAAACATCTTGGACTACTTAAATGCAAAG
ASHG19A3A030722	92.1846	262.32	6.4528	8.12034	noncoding	ENST00000416894	RP11-54A4.8	Ensembl	566	chr1	+	150488232	150490508		CTCTTAATGTATTTCTGCACTCTACACTAGCAGCCTATTACACAGGACACTTGGATGTCT
ASHG19A3A032364	108.32	156.4	6.68688	7.37356	noncoding	ENST00000438217	XX-C2158C12.2	Ensembl	758	chr6	+	171034284	171037576		CAATTTGGAAGAAAACATTTCCATCTGTTAATAAAGAGCAAGGGCCTCTGGTCATAAGTG
ASHG19A3A040334	78.5007	70.24	6.2153	6.21375	noncoding	ENST00000454625	GS1-421I3.2	Ensembl	772	chrX	-	119144674	119149501		ATGAAAGCAATTGGTCAGAGTAGCCACTCTGAAACCTGCCTCAGACCTTGGATACTTTGT
ASHG19A3A032178	3069.76	3291.14	11.4982	11.7586	noncoding	ENST00000359838	RP3-337D23.3	Ensembl	453	chr6	+	147480060	147502128		TAACAGTGCTGGACCTAAAAAAGGTGTTGGCCCACGAGTGCCTCTCTCTCCCTGCCTGAG
ASHG19A3A029850	215.01	212.147	7.66544	7.81461	noncoding	ENST00000445172	RP1-153P14.3	Ensembl	735	chr6	-	37511328	37514531		ATAGTAACAAATGGGCATGTTTGCTGCCTCCAAAGCTGTGGTGTCCCTGGATAAATAGAC
ASHG19A3A039249	677.586	761.733	9.31214	9.66297	noncoding	ENST00000425153	RP11-205K6.2	Ensembl	339	chr9	+	129289896	129292622		AAGGGATTCCACCCCCCATTCCAAGTCCCCTCCAAAAATATATATTGAAAGAAAACAAAA
ASHG19A3A032388	58.5326	85.8238	5.78715	6.49591	noncoding	ENST00000416100	AC102953.6	Ensembl	242	chr7	-	1548290	1549063		CAGTGGCCCCATAGCCCACGTCCACCGGAGCCACAGGATGGGAGCTTATTTGCAAACAAG
ASHG19A3A022259	173.069	269.868	7.3512	8.16252	noncoding	ENST00000429328	RP1-18D14.4	Ensembl	479	chr1	+	47644921	47645829		TATAGAGCCAATTTTACCGGCAAAGGAATGGAAGATCTGAAAGGCTAGGCGATCCCACAA
ASHG19A3A039315	188.698	133.108	7.47525	7.13781	noncoding	ENST00000435157	RP11-344B5.3	Ensembl	395	chr9	+	132021340	132023860		TCCATTCGCCTATCCATCCTACAGCAGCGACTGCACCCCTGATTGTGATGACGAATGCAC
ASHG19A3A029330	75.2643	75.0315	6.15502	6.30847	noncoding	ENST00000455327	RP1-40E16.3	Ensembl	335	chr6	-	3051334	3053987		CAGCTGGAGATAAGGAGTGGGCCCTGGAAGATGCTCAGTCAGGCCCTGCTCCAGATTTTA
ASHG19A3A010729	247.442	316.93	7.86583	8.3977	noncoding	ENST00000417298	AC100848.1	Ensembl	637	chr18	+	61814442	61826528		ATTTGCTACAGCTCCCGTTATGGTGCCTTTAGAAGAAATAAAGATCTCCTGCCTCACTTC
ASHG19A3A030191	1595.31	1306	10.5541	10.4353	noncoding	uc003pji.2	BC038576	UCSC_knowngene	553	chr6	-	82523004	82523909	ENST00000441949,	TTGTAGTTGGTTTTTGAGTCTCCAGCTTCACCTCTCAACTCCTGCCACTTTATGGAACAC
ASHG19A3A031704	1122.47	975.065	10.0472	10.0143	noncoding	ENST00000456795	RP3-331H24.4	Ensembl	352	chr6	+	72038644	72039509		GCAGCCCTTTAAGTTGGGTTCACCTATCCCACCCTATTCCTGTATCTATTTTATTCTATA
ASHG19A3A030277	120.91	125.639	6.83803	7.05726	noncoding	ENST00000434493	RP1-177I10.1	Ensembl	442	chr6	-	92100030	92102718		AGATAGACCCCCATTCCATGGAATCCAATATTCCCAGACATTATCCTCAATATGTGTCCT
ASHG19A3A034781	94.7945	75.998	6.49445	6.32755	noncoding	ENST00000413005	RP1-79C4.1	Ensembl	1923	chr1	+	170567994	170616480		TATGGGCAATAAGAATGTTTTAATCCTCACTTCTTGTGCTGTCTGACTCAGTATTTATAC
ASHG19A3A011377	128.596	133.207	6.9275	7.13873	noncoding	ENST00000431729	RP11-191N8.2	Ensembl	423	chr1	-	222001007	222014008		ATTTGATGAATGAAAACTCCTCACTTGTGCTCTGGTGGTGTTTTAGGACAATGGGCCCCT
ASHG19A3A051098	901.635	1020.59	9.72832	10.0798	noncoding	ENST00000421937	RP11-458D21.2	Ensembl	666	chr1	-	145373053	145375554		AGTCTCTGGATCTGAAGTCATCCACTTTCCCATTCCTAGCTCACCTCACCCATCGTGAAG
ASHG19A3A043528	703.273	782.668	9.36885	9.70171	noncoding	ENST00000436340	RP11-195B3.1	Ensembl	463	chr10	+	3308194	3309207		ATATGAGGAACTTAGCAAATGGACTCATTCTTCATTTTCTTCTTCCTCTCTCTCCTGATT
ASHG19A3A041324	78.4847	88.5477	6.21505	6.53897	noncoding	ENST00000418471	RP1-212P9.3	Ensembl	1085	chr1	-	29196994	29203848		AAGGAGATGGTTAAAAGAGAAAAGCCTTTCTCCGGACCCACCTGCAGCATTAAGAACCAT
ASHG19A3A031047	400.15	508.961	8.55286	9.08755	noncoding	ENST00000426374	RP1-135L22.1	Ensembl	387	chr6	+	21354641	21355527		TGTGCCATGTGATCCTCCCTGCAAAACCACAAATCTCCAGTAAAATCTGTAAAGAAAAAA
ASHG19A3A047152	2498.3	2525.67	11.1951	11.3976	noncoding	ENST00000441638	AP002856.7	Ensembl	569	chr11	+	131104432	131121711		ACTACCTGCAAAAACACTACTTAAGGTGTCGCCCCCTCTTCATGGGAGTAGACATATTCT
ASHG19A3A032043	129.032	128.07	6.93184	7.08634	noncoding	ENST00000444229	RP11-527F13.1	Ensembl	583	chr6	+	126498338	126523385		AAGATAGAATTTTGGACCTGGATCACCTGTAGCCTGCCTAGCAATGAAGACCTCATCAGT
ASHG19A3A050753	275.905	261.325	8.02513	8.11512	noncoding	ENST00000437515	AL358175.1	Ensembl	2504	chr1	-	121102016	121139765	ENST00000441760,	AATGCCTTTCATCTGTGATCTCACATACCAGCCTGTCCTTTCCATTGAGAGGAAAGCTGA
ASHG19A3A031191	165.948	136.243	7.29154	7.1719	noncoding	ENST00000445544	HCG16	Ensembl	317	chr6	+	28954576	28956313		TTTAAATGATTCGAATCTTGAGGTTTCAAACTGAACCGTCTTGTGCCTTTTGCCCGGCGG
ASHG19A3A020069	491.728	487.159	8.84373	9.02657	noncoding	NR_002733	DGCR5	RefSeq_NR	5427	chr22	+	18958026	18982141		GCATGGGATTAAGCAAATGTTTCCTAATCATGTTTGTCCCTGTGCTCTGGCTTCTTGACC
ASHG19A3A052539	234.928	232.775	7.79063	7.94653	noncoding	ENST00000424689	RP11-431K24.4	Ensembl	477	chr1	-	8278249	8280589		TCTACCTGAAAACAAAACAGGCACAGAGCACCTCCTGCTTGCTTGTGTGGTCGCAGGGCC
ASHG19A3A045244	103.033	100.114	6.61405	6.7199	noncoding	ENST00000444042	RP1-18D14.3	Ensembl	363	chr1	-	47643840	47644943		TTGAGGCATCAGCACAATGGACCTGGCCACACCAGTTTATTCCACACCGCTGAGGCTGGT
ASHG19A3A028161	86.8475	81.0737	6.36023	6.4182	noncoding	uc003jng.2	LOC153684	UCSC_knowngene	1222	chr5	+	43041676	43045370		TAGGACTAAGAAACTTGAGGCTAGGCTGACCCCATGGTTGTTATGATTAGAAATCCGAGG
ASHG19A3A054960	66.5861	67.853	5.97886	6.16374	noncoding	ENST00000477499	AC108004.2	Ensembl	787	chr17	-	33614	37038		ATAGAAGAAAGACTCACATTTCTTTGCACCATTGAGCCCATCACTGCAGCACCAGAGCAT
ASHG19A3A045884	317.349	369.395	8.22287	8.62435	noncoding	ENST00000429099	RP11-117D22.1	Ensembl	383	chr1	-	53814159	53814905		CGCCAGCATTTACTTCATACCTCCCTTTAATCAACTCACTTTTCTCTAAAAGCTTTAAAA
ASHG19A3A050111	163.527	190.825	7.2708	7.65811	noncoding	ENST00000425609	RP11-460G11.1	Ensembl	547	chr13	+	43732766	43733602		TAAACCATCTGTCTTCCCTTCCTGGGGAGTAGCAGGTTATGAATAAATTATGCTGCCAGA
ASHG19A3A037830	68.7284	95.3612	6.02483	6.64729	noncoding	uc004bbt.2	BC035187	UCSC_knowngene	3729	chr9	-	105902809	106087312		ATTGCAGCTATACCCTTTAGACAGGAAACACACTTTCCAGTTCTCCTTGACAGAGAGGCT
ASHG19A3A015597	743.542	736.456	9.44785	9.61372	noncoding	ENST00000425325	AC012354.6	Ensembl	2681	chr2	+	45181802	45195897		TTCATCCCTGCTCATTAGTCTCCTCCTCGGTTGTTTGGTTGAATGTTTCCTAATGCCAAG
ASHG19A3A036799	110.983	102.48	6.71946	6.75519	noncoding	ENST00000458683	RP11-108M21.1	Ensembl	858	chr1	+	187061973	187329455		AATCAGGAAGTATATCTAAGTCACCTCCAGTAGCCGTAACTCTACCTTGTCCAGTAAAAG
ASHG19A3A015875	136.195	154.682	7.00713	7.35724	noncoding	ENST00000443419	AC073628.1	Ensembl	635	chr2	+	78143059	78145135		AGTATGTGGTGGTATCCACTTACTGTCTACTGCCTCCATAACTCCTAAAGTCTTCTGAAG
ASHG19A3A041692	85.9862	77.3026	6.34475	6.35238	noncoding	ENST00000454307	XX-FW80269A6.1	Ensembl	482	chrX	+	150684022	150684717		TAGCCAAAAGGGTCTATGGTACATTTTACACACAACAGGGTACCCCTCATGGTGATGAAA
ASHG19A3A029463	147.904	136.981	7.12577	7.17942	noncoding	uc003ncv.1	AK092541	UCSC_knowngene	1930	chr6	-	19802394	19804981		ATCTTCCACCAGACTTACAGGTGTTCCACCTGCTTGTAGTTTCGGTAATAATACCAGCTG
ASHG19A3A038537	1264.21	1152.79	10.2158	10.2588	noncoding	ENST00000431981	RP11-112J3.16	Ensembl	407	chr9	+	35786642	35790429		TCACAGGTACAGCTTGTGCTAGGCAGCCGGTGTTCAATAAATATCGTGCCTAAGGATAAA
ASHG19A3A007229	658.636	625.72	9.27144	9.37964	noncoding	NR_024090	C21orf131	RefSeq_NR	2014	chr21	-	22114913	22175426		tgctgctgtgtccttcccctattggctaaggcttctgacagctttggagattgtgacatt
ASHG19A3A014866	178.201	161.059	7.39263	7.41603	noncoding	ENST00000420522	RP1-37J18.2	Ensembl	682	chr1	+	4631607	4643481		AAACCAGAGTAAAAGCAACCAAAACAGAGTCCAAGTCAGGGTCCTTCCATCCTCAAACCA
ASHG19A3A043461	444.409	435.646	8.70331	8.86374	noncoding	ENST00000450206	RP11-432J24.3	Ensembl	1013	chr10	-	134247236	134254988		CCCTCCCTGGGAGAAGCTGCAGCTCTGAGGCTACGGTCTTGCAGGTCAGCCACCACCTGG
ASHG19A3A031707	258.637	193.587	7.93104	7.67927	noncoding	ENST00000431997	RP1-288M22.2	Ensembl	454	chr6	+	72160536	72168577		TCCCTTGTCTTCATGGCCCAGTTTCTCTGACACCGTGTTTATTCTTATGATGACCATGGT
ASHG19A3A032300	439.418	412.489	8.68727	8.78283	noncoding	ENST00000420601	RP11-235G24.3	Ensembl	379	chr6	+	161347400	161348194		TTGGCCTCCTGGCTCATCATCCTGCCGGAAGCATCTCCAGCTTGGGGATGTTGGAGGGTC
ASHG19A3A050033	218.102	188.004	7.68682	7.63648	noncoding	ENST00000418076	RP11-37E23.5	Ensembl	437	chr13	+	32872290	32872849		TCAATAGCTTACACGTGCTTCCTGATGCCTGCCTTAACAACAAAAAATTCGTGTCCATAG
ASHG19A3A037384	110.11	102.948	6.70882	6.76225	noncoding	ENST00000432488	RP11-16L9.4	Ensembl	662	chr1	+	198985261	199045864		AGTGAACAAGTATTTGTGACTCTCCTTCCAAATGAAATGTTCTACAGAAAGGTGGAAGTG
ASHG19A3A031390	2463.1	1205.77	11.1741	10.3224	noncoding	ENST00000419956	RP1-187N21.2	Ensembl	2279	chr6	+	34252266	34254545		ATAACTGCTCTTTGGCTCTGTGTGTGAAGATTGGGGGAGAGGATGTAAACTAAGAGTATA
ASHG19A3A029459	646.15	579.072	9.24321	9.26996	noncoding	ENST00000443504	RP11-686D16.1	Ensembl	381	chr6	-	19290549	19321252		ATTGCAAAGGTTTCCCCCGCTGATTCTGCCAACAGAAATGTTTTTATTGTGCTGCTTTGG
ASHG19A3A031134	150.417	223.246	7.15187	7.88488	noncoding	NR_026775	C6orf41	RefSeq_NR	983	chr6	+	26924771	26991752		GAGGCCAGAAGTCAGAAAACAAGGTGTCTGCAGGACCAACCTCTCCTCTGGATGCTCTAG
ASHG19A3A033220	104.081	88.2335	6.62873	6.53426	noncoding	ENST00000423943	RP11-48O20.4	Ensembl	1113	chr1	+	159931013	159948851		AAGATGAACAACATGACCGGGAAGATTTCCTAATCTCACCACAGCCTGGCTCTACCTTAA
ASHG19A3A047888	81.4824	75.7761	6.27008	6.32319	noncoding	ENST00000437598	RP5-1027O11.1	Ensembl	787	chr1	-	88365591	88371397		AGAATCTATTGCCCTCTTTACTTCACAGTGCTACAGAGAGGATTACATGAGCCAATATTT
ASHG19A3A055220	258.627	267.81	7.931	8.1506	noncoding	uc003nsj.1	AK094433	UCSC_knowngene	1980	chr6	+	31021983	31027653		CTTTGTTGGATTGGGCTTCATTGTGAAAGAGTGTTTCCTGCCTCCATTAAATCCATCCAC
ASHG19A3A038890	164.058	201.642	7.27602	7.74053	noncoding	ENST00000447524	XXyac-YM21GA2.4	Ensembl	452	chr9	+	90479080	90481205		TCCATGGAAAGACCTGGAGAGATTGGCTCACTGCTGAGGAGGCTGCTGCTCTTCCCTTAG
ASHG19A3A000270	79.2743	66.8641	6.2296	6.14177	noncoding	ENST00000441942	AC002511.1	Ensembl	474	chr19	+	35897486	35900395		GAAAACCCACCCATCTACCTGCAGGAAAAGagacagggtttcactatgttggccaggatg
ASHG19A3A039138	296.675	297.007	8.128	8.30174	noncoding	ENST00000428292	RP11-18B16.2	Ensembl	1223	chr9	+	116413235	116445135		TATAAAACCTGATGGGAGGGGAGGTTGCAGTAAAAGCCTTGGAGATGAAAACACTGGACA
ASHG19A3A015363	82.7695	79.4868	6.29251	6.39015	noncoding	ENST00000432822	AC019055.1	Ensembl	443	chr2	+	19911475	19917337		AACATATCTCAAGGAGCTCATGAAGTCATCCTCATGCACACAGTTTCCCAGGTGTCAGAT
ASHG19A3A029875	171.784	173.833	7.34061	7.52553	noncoding	ENST00000447315	RP11-552E20.4	Ensembl	824	chr6	-	40326482	40337213		TGTCACATCAGGGAACCCGACTCCAGAACCCTCTGTAAATATCCCATGGCTTGGCCCTGC
ASHG19A3A053898	62.3471	118.757	5.88191	6.97394	noncoding	ENST00000437157	RP3-510D11.1	Ensembl	548	chr1	-	9228326	9262678	AK123145,	ATCCGCCCTTTCGTTTTGCGCAGGTGGAGATCTCGCGGGCCCAGTTCGGAGTCCTGCAAA
ASHG19A3A038145	11195.8	12407.8	13.3785	13.67	noncoding	ENST00000417262	RP11-480I12.3	Ensembl	748	chr1	+	202780089	202781041		TATTTTGTGTAGTCCTACAACGTCTTGTTACTACCCCCTATTACAACACTTATAACTCAG
ASHG19A3A014132	956.321	987.188	9.8124	10.0313	noncoding	ENST00000421071	AC068057.2	Ensembl	482	chr2	-	105365841	105371333		ACATGTTATATTGTGGCCCATGCCCTCCTCCTGAGTTCTTCAGTTTTAATCATTTCATTT
ASHG19A3A014624	71.2306	82.6279	6.07529	6.44263	noncoding	ENST00000420406	RP4-740C4.4	Ensembl	371	chr1	+	2357418	2362089		AGCAGGTGGCTTTTCTTGAGCGCCAACATTCTGCCCGTGGGTGAGTGAGGCCCTGGCTAC
ASHG19A3A009877	347.103	452.038	8.34662	8.91696	noncoding	ENST00000442627	AC118653.2	Ensembl	561	chr17	+	69592478	69593419		AAGCAAAGGGCTTGGTGGAGAGCAGAGAGCAAATAGATAATATAAGAATCTCACCCCCAA
ASHG19A3A037678	1594.92	1222.69	10.5538	10.3443	noncoding	ENST00000425666	RP11-389K14.3	Ensembl	1013	chr9	-	93063183	93195771		TGGCAGGGGGTGGGTATAACCTATGTCAGTGTTTTTCAATGTGAGCAAATTTTAATAAAC
ASHG19A3A055332	680.459	762.646	9.31795	9.66528	noncoding	ENST00000441326	RP11-38P6.1	Ensembl	792	chr9	-	67579806	67583159	uc011lre.1,ENST00000448485,ENST00000444791,ENST00000417850,	ATTGACCTCCAGCTCCCAGTTTCAGAGAGTTCTCCCAGTCTCCTGGATCACACTGGTCGG
ASHG19A3A012296	115.11	107.764	6.76943	6.83105	noncoding	G65685		misc_RNA	205	chr1	-	230142624	230142829		TTCTTGGTGGATCTTGCCTCTGCAGCCTCCAGTGGATGGAGCGATGTGTGAGTGTGAGCA
ASHG19A3A013896	155.033	145.324	7.19331	7.2657	noncoding	ENST00000437233	AC084149.2	Ensembl	284	chr2	-	77879538	77881794		CATTTCTGATGGCTTTTATCCATCCTGCCCAAATAAAATAAACAAATTACCCTGCTACTT
ASHG19A3A031012	91.8461	83.972	6.44731	6.46589	noncoding	ENST00000434947	RP3-448I9.1	Ensembl	405	chr6	+	14394556	14404520		AACAGAGCTTGGAAGACCGACAAGTGAACAGTTGATAGTGTCCTGTTCTCCTGTTGTGTA
ASHG19A3A017452	684.218	718.887	9.32769	9.5768	noncoding	uc002wsk.1	CR627206	UCSC_knowngene	4392	chr20	-	22255045	22263124		TAAGTTGTGTAGTGAGTTCTTGTTGTGTGTTCAATGCTTCACCTCCACCTCCTCATCGGT
ASHG19A3A009654	53.0235	123.786	5.64311	7.03549	noncoding	ENST00000480386	RP11-357H14.4	Ensembl	566	chr17	+	46706036	46712294		CCAAATTCTCTACTAGGCCTCCGAACCAAAACGAAGGAAAATCCGTTTTCTTCTTGGGCT
ASHG19A3A041998	91.3826	150.465	6.43871	7.31828	noncoding	ENST00000422414	RP4-781K5.7	Ensembl	1008	chr1	+	234845134	234855723	uc001hwi.1,	CGCATAATGCAAACAATTCAGGTTTCACCCTTTGCAGTGAACTTTGTACAGCTCTCCCAG
ASHG19A3A037264	122.417	137.877	6.8579	7.1891	noncoding	ENST00000444956	RP11-384P7.6	Ensembl	486	chr9	-	33732972	33738414		CCCACCATTGGCCTTATTTACTGGAATGTTTTTATAACCTTTATTTGACACCTCTTCCCA
ASHG19A3A037951	467.551	471.506	8.77556	8.97401	noncoding	ENST00000415101	RP11-402G3.5	Ensembl	404	chr9	-	117418583	117424654		AAGACGTCTGAGCCATCCCTGTGCCACCACCAAGAGTCACTCCAGCTTCTGAAAAAGCCA
ASHG19A3A015325	1701.02	2038.44	10.6516	11.0836	noncoding	ENST00000417473	AC099344.4	Ensembl	499	chr2	+	11534106	11542372		GAACCTTCTCAGCTTATTCAGAGAGGCTTCTTCTTCCTATTTAGTCTCCCTCTGGCTTTC
ASHG19A3A020538	152.764	112.834	7.17377	6.8975	noncoding	ENST00000450750	RP4-754E20__A.5	Ensembl	951	chr22	+	43796336	43805687		ATTTTACAAATTTAGCCACTGTCACCGGAGGCCTGGCTGAACTTCAGAGTTTCTTCTCCA
ASHG19A3A014169	314.576	272.478	8.21019	8.1762	noncoding	ENST00000445083	AC019100.3	Ensembl	611	chr2	-	108784203	108834297		TACTAGAATGTTCTCTGCCATCCACTAAGCATTGAATCCCTCCAGACACTGTTACAACAG
ASHG19A3A017909	185.374	156.258	7.45128	7.37247	noncoding	ENST00000423020	RP5-963E22.4	Ensembl	542	chr20	-	61798148	61812255		AGAAGAGCAGAGAGATGAAGGCCTCCATGCCACAGCCCAGGCCGTGCACATTTGTGTTGA
ASHG19A3A044647	1124.72	1198.96	10.0512	10.3143	noncoding	uc001lkg.1	AK124226	UCSC_knowngene	3086	chr10	+	129979399	130115990		TGTCCTCATGTTAACCCCCTTATGCTGTCTCCTCCAATAATGCATGTGGTTTGGTCTCTA
ASHG19A3A013253	926.368	802.915	9.76646	9.73821	noncoding	ENST00000414654	AC092580.3	Ensembl	469	chr2	-	7811734	7812377		TTGTTCTTTTTCTACCCATAAGGGAATGATTCAAAATGTCCCTCCACCTGGGTCCAACCG
ASHG19A3A013749	322.596	270.555	8.247	8.16628	noncoding	ENST00000430134	AC007386.4	Ensembl	1018	chr2	-	65257880	65280151		ATCCAGTTCTCCAAGGTGTTCATTTTGACATCCAGCCTGACACTTCCTTCGCACTTTTGT
ASHG19A3A030866	3412.72	3971.77	11.6604	12.0309	noncoding	ENST00000415530	XX-C2158C6.3	Ensembl	439	chr6	-	171045260	171046865		AGTCCCTCTGTCCCTCTGTCTCTGCCAACCAGTTAACCTGCTGCTTCCTGGAGGAAGACA
ASHG19A3A012747	69.7792	78.2187	6.04621	6.36927	noncoding	ENST00000419624	AC005392.13	Ensembl	500	chr19	+	43657430	43665014		TTCCAACACTGAGACCATTCCACAGCCTCTGAATGACAAGACAGGCCTTCAAAATCAAGA
ASHG19A3A016424	278.18	108.512	8.036	6.8414	noncoding	ENST00000453636	AC092620.3	Ensembl	680	chr2	+	139362079	139370737		GTGGAACTGTATTCTCTAATCAATATTAGCACATACATATTGCCCCAGACTGTACCTCCT
ASHG19A3A013208	154.233	109.51	7.18716	6.85363	noncoding	ENST00000452701	AC011995.1	Ensembl	574	chr2	-	2838035	2842163		TTTTTCAGTCCCTGAAGCTGCTGCTCTGCCCACTCAGGAAGGTGAGGAAGGCAGACGACA
ASHG19A3A008756	1890.24	1695.42	10.7994	10.8145	noncoding	uc002jiu.1	AK094963	UCSC_knowngene	3032	chr17	-	70067183	70112157		AAACTCTGGATCTGAAGGGAATGTTCATGACTATTTCATCCCTCCTGCTGCCTTGGAGAA
ASHG19A3A015246	486.846	493.196	8.83204	9.04455	noncoding	ENST00000444079	AC093326.3	Ensembl	762	chr2	+	558203	578145		TCAGAATGCTAGGCTGTCGCTGGTTGTGGATTGAACTCTAGCATCTTATCTCTATTCTAG
ASHG19A3A018126	255.16	159.076	7.91413	7.39763	noncoding	ENST00000439450	RP5-1097P24.1	Ensembl	439	chr20	+	22201191	22203921		CTTCAATAGTGAATTAGGTTCCCTCTACCATCTGAAATGTTACAGTTCGATAAAATAGGT
ASHG19A3A039244	73.0337	94.1712	6.1113	6.63001	noncoding	ENST00000441473	RP11-343J18.2	Ensembl	316	chr9	+	128819858	128921892		ATTCTGTGGCAGAGATTAAAACAATTTCAGAAGCAGGCACCCAATCCTTCTCTTTGGATG
ASHG19A3A037062	229.73	196.343	7.75809	7.70055	noncoding	ENST00000424605	RP11-125B21.2	Ensembl	746	chr9	-	2535651	2570754		ATATGAGAAATGTCACCTCCTGGCTACCACAATAATGCAACTAGGAGTTCTGGTTCTCCG
ASHG19A3A037445	434.779	410.965	8.67194	8.77664	noncoding	ENST00000377547	RP11-374M1.5	Ensembl	439	chr9	-	45001906	45003117	ENST00000454331,ENST00000451009,ENST00000421418,	GATCCGTTCACATCTGGAGAGTTTATTTATAACTCCCTCTATAACTCTCTGTTTGGAGGC
ASHG19A3A037807	233.811	244.955	7.78355	8.01925	noncoding	uc004bad.1	AK057451	UCSC_knowngene	1544	chr9	-	102348067	102582171		TTCGAGAAGATTTTGTGGCCTTTCTCAGCTGTCTAGGTGCTGTAGGTGCTGTGTTTCTAT
ASHG19A3A013734	97.1671	179.748	6.5318	7.57452	noncoding	ENST00000448204	AC114752.1	Ensembl	289	chr2	-	64557619	64559265		TGCCCTTTACTCTGCGGAGCCCAGCTTCCTACTGCAGTAAACTCTCACATGGCCAAGAAG
ASHG19A3A000052	157.138	153.342	7.21529	7.34503	noncoding	DQ860411		RNAdb	773	chr20	-	61726844	61733671		CTGGAACCACCCACTCTGCAACCAGCCGTGAGGCGTGAGGCTCACTCGGAAGCTCCCGGA
ASHG19A3A010827	2905.64	3572.8	11.4109	11.88	noncoding	ENST00000458662	RP11-122M14.3	Ensembl	174	chr1	-	211889269	211898744		TTCCTTAGAATGAGGACCCTGCTCAGTTGCCCCCTCCCAGTCATGTGGTGAGTACTGGGA
ASHG19A3A031281	100.911	127.164	6.58639	7.07602	noncoding	ENST00000430364	XXbac-BPG181B23.4	Ensembl	2141	chr6	+	31409443	31414750		TTGATATGAACGTTTTCTCCCACAACTGATTGACTGGACTTTTGTCTCAGGGCAGAGGGA
ASHG19A3A015366	582.22	652.997	9.0893	9.44131	noncoding	uc002rdf.2	BC068572	UCSC_knowngene	3008	chr2	+	20068620	20084807		ACAAAACACAGTCTGACTTAGAGATTCTCTGGCATGACTCTCTTCCCCACTGTGTACACT
ASHG19A3A018009	94.3829	80.0774	6.48714	6.39999	noncoding	ENST00000419003	RP4-779E11.3	Ensembl	480	chr20	+	4173713	4176375	uc002wkq.2,	TTTGTGCAAACCTCAGAACTGTGTCCTCCAAGGGCCTGGGGTATTTGGCAGGCGCTGTCT
ASHG19A3A014131	348.032	321.064	8.35054	8.41541	noncoding	uc002tcj.1	AK096621	UCSC_knowngene	2436	chr2	-	105363095	105374177		CAGGAAAATGTAAGGAAAATTGAAGGTGTTCTCAAGTGTGTCTGCTGCTGCCTGACACAG
ASHG19A3A052048	4497.49	4815.24	12.0593	12.3117	noncoding	ENST00000417705	RP11-54O7.3	Ensembl	1389	chr1	-	852249	855072		CTTAGGGCAGACCCCGACTTCAGAATTTATACAAATAAATGCAATGAAAAGTGCTGGCAA
ASHG19A3A046702	775.868	952.337	9.51201	9.97899	noncoding	ENST00000427547	AL162400.1	Ensembl	157	chr1	-	63543751	63544702		GAAAACTTTGGGCACAAGCTGGAAGGTCATTTACTGCAAACCACTATCTCCCAGCTAATC
ASHG19A3A016939	153.248	210.008	7.17785	7.79952	noncoding	ENST00000412427	RP11-380J14.1	Ensembl	4676	chr1	+	17516277	17524112		CAGCGAAATCTACCAACCAAAGAGGATGTCCATACCTGTCTTTTTCTTTCTTCCTTCATT
ASHG19A3A038350	251.098	275.158	7.88977	8.18966	noncoding	ENST00000443688	RP11-390F4.3	Ensembl	472	chr9	+	6718809	6719370		ATCTAGTCAATTTGAACCACCTCCTCAACCACCTATGAGGGCCTAAACACTCTTTCACTC
ASHG19A3A007301	286.101	318.421	8.07616	8.40363	noncoding	NR_024411	LOC254312	RefSeq_NR	946	chr10	-	10976903	10994126		CGTGCAGAAGACCGAGGAGCCATTGGAAAAGAAAAAGAGAACATATATCCCCCTACCTTT
ASHG19A3A043020	109.246	71.8054	6.69856	6.24482	noncoding	ENST00000429070	RP11-589B3.6	Ensembl	606	chr10	-	81388512	81391944		AGCATCCCACCATCCATTGCTGCTGCATCAAGGTATTAAAAAGAGAGACAGAAGGAAGAG
ASHG19A3A036809	108.827	121.489	6.69355	7.0069	noncoding	ENST00000427337	RP11-445P19.1	Ensembl	424	chr1	+	187412759	187446354		ATGTGGAGAAGAAAGAACACTCAGATGTGCCCTGGAGACTTTCCTTTTATTTTTAAACAG
ASHG19A3A037460	95.2428	82.1886	6.50116	6.4367	noncoding	ENST00000418666	RP11-292F9.1	Ensembl	931	chr9	-	46270785	46274928		TCACCGTGAGGTGTGTGACCCATGCTCACATCCAGGGGCCACTCATTCATTCAGGAAACA
ASHG19A3A040640	91.6161	102.244	6.44324	6.75142	noncoding	ENST00000432272	RP13-297E16.4	Ensembl	382	chrX	+	1853009	1874878		GAAAATCAAAGAGGAACCAACCCAGAAGTATCCCCCAGGACAAATCATTAAGGGGGAAAA
ASHG19A3A049455	480.058	412.325	8.81391	8.78253	noncoding	ENST00000414480	RP11-14O22.1	Ensembl	511	chr13	-	38055603	38058906		TGTATCATCTCCTTTTCCTTGCTCCATCCTGCTACCTGAAAAATGGATGTGGTGACAAGC
ASHG19A3A017416	109.069	107.521	6.69677	6.82772	noncoding	uc002wrh.3	HSPC072	UCSC_knowngene	1951	chr20	-	18768614	18775228		TGTCTTCTTGGATGGGCTCTCCACATCTTCCACCACGAAGTAAAAACAATTCTTGTGGGT
ASHG19A3A044197	199.998	180.625	7.55715	7.58038	noncoding	ENST00000436500	RP11-514F8.2	Ensembl	370	chr10	+	82409552	82413488		CACGCTACCTCATCCTTTATGACACCCTTTGATATGTTGCTTTTGATGCATTTCTTTGTA
ASHG19A3A014204	8986.42	17635.8	13.0628	14.1836	noncoding	NR_024373	LOC541471	RefSeq_NR	557	chr2	-	112186889	112252692	NR_024206,NR_024205,NR_024204,	TGGCCAGTCTCTGTGTGTCTTAATCCCTTGTCCTTCATTAAAAGCAAAACTAAAGAAAAC
ASHG19A3A037578	92.1633	73.6539	6.4522	6.27982	noncoding	ENST00000435735	RP11-180A14.5	Ensembl	2625	chr1	+	200890121	200935658		TATGAACAGATGCGGGCCTTGGGCACTATTTCCTGGCTGCTGAGGTTTATTTGCAATTTT
ASHG19A3A043537	1982.73	1657.91	10.8621	10.7818	noncoding	uc001ihd.1	AK095699	UCSC_knowngene	2390	chr10	+	4426437	4452804		ACTCCCGGTCCGCATTTGGGATTCTGTATGTAAACCTCAGAATAAATTCAACAAAATTTG
ASHG19A3A041574	89.6115	66.8265	6.4095	6.14096	noncoding	ENST00000439434	RP11-265D19.6	Ensembl	405	chrX	+	134530353	134531689		AGAGTCATGTGGCTTATGTGCTGAGGCCTGCCCAGAATTCTGAGATATTAATTATAATTA
ASHG19A3A044402	69.9882	89.5616	6.0508	6.55573	noncoding	ENST00000442188	RP11-107I14.2	Ensembl	382	chr10	+	103070774	103071262		TCACATTCCCTAAATACTAATGGCAGGGATTTGCTGTGCCCCATGGCTCAGTTAAGTTCT
ASHG19A3A030059	5099.2	3293.68	12.2382	11.7605	noncoding	ENST00000425089	RP11-524H19.2	Ensembl	586	chr6	-	54704915	54705653		AAATGTTACGATGATTGAGGGCTGTACTGGTATTTGGTGGGCAGGGAATGACAATGTCCT
ASHG19A3A015759	3686.47	3874.3	11.7755	11.994	noncoding	ENST00000450944	AC023115.4	Ensembl	574	chr2	+	67551758	67552436		AATATTATGTCAGTGAAACCAAATAATGTGTCTCGGTTCCTCCCCCTGAGCATTCCACCC
ASHG19A3A013209	81.1291	84.4405	6.26328	6.47508	noncoding	ENST00000437610	AC011995.3	Ensembl	578	chr2	-	2874329	2875003		CTGCATGGAATAATGAACCCACAGCTTTGGTGAATAGGCAGCCACCTCTGCCACATATCA
ASHG19A3A040577	452.401	429.209	8.72979	8.84301	noncoding	ENST00000433825	XX-FW83128A1.2	Ensembl	341	chrX	-	153562309	153563387		GGGTTGTAGCTTCTTCCTTCACCAACTCTGTTACTTCAGTATCCCTTTTGCACTTTCAGC
ASHG19A3A000272	64.6279	69.5355	5.93586	6.19872	noncoding	ENST00000442358	RP11-404O13.1	Ensembl	649	chr1	-	158101833	158110420		TGGTCAGCTTTTCCTCAGTGGAGTGGTCAGCAGTCCAACTACCAGGGCCAGAGCCCCATC
ASHG19A3A049607	425.337	551.763	8.63992	9.20429	noncoding	ENST00000423442	RP11-168P6.1	Ensembl	1058	chr13	-	54689923	54707001		GCATCCTGTCTCCCATTTTTGCTAAAATTCTATCTAGAGAAAGAGCTCATTTTTAGCTAA
ASHG19A3A018418	226.819	307.375	7.7405	8.35573	noncoding	ENST00000457536	RP5-991B18.1	Ensembl	277	chr20	+	47100222	47130447		TGAATCTCCAGCTCAACAACTCTCAGACTTGAGAGGCAGCACCGGCAACTCCCCAAGGCT
ASHG19A3A030920	60.4473	96.2217	5.83441	6.66085	noncoding	ENST00000427049	RP3-400B16.1	Ensembl	477	chr6	+	4155169	4156133	uc003mwg.1,	GTGCATCTGAGATCTAGCAAATTTCCCTGTTGGCCACATACTGATAATGATGTATTAAAA
ASHG19A3A015672	227.364	154.951	7.74366	7.36023	noncoding	AL110130		misc_RNA	2409	chr2	+	55852072	55858573		AAAGGCTGTTGGCTGTTGTATCTTGTAAACAATTCAACGCAATGCCAAGTGAAAATGAAG
ASHG19A3A041626	101.502	102.597	6.59442	6.75667	noncoding	ENST00000413328	RP11-298A8.2	Ensembl	217	chrX	+	140013902	140079613		GTTCATGACCCGTCATCTGCATGGTGGTGCAGGAAGCTCTTCTTTCTCTTCGTACATGAG
ASHG19A3A000288	543.421	578.016	8.99008	9.26744	noncoding	ENST00000445296	DAQB-12N14.5	Ensembl	399	chr6	+	29497252	29499934		ACTGAGAAGCATGCACTGTGACCTGCACACCCAGCCAAACCTGAGCAAGCACCCCCACCA
ASHG19A3A050256	93.2288	100.327	6.46801	6.7225	noncoding	ENST00000418943	RP11-473M10.3	Ensembl	776	chr13	+	64322131	64325213	ENST00000450029,	CAGTCTTTTGTATTACATTTCTCCTGTCTAAATCAACTGTGTGGTTTCTACTCATTATGG
ASHG19A3A040065	324.072	234.94	8.2533	7.95809	noncoding	ENST00000458170	RP11-69A21.2	Ensembl	451	chrX	-	72027258	72028044	ENST00000445437,	TGAAGTCCTGTTGGTCCCTACCGGCACATCACACACTCCTGGAAGCATGATCTTCACTCC
ASHG19A3A019206	118.849	132.086	6.81475	7.12777	noncoding	ENST00000455028	AF015262.2	Ensembl	698	chr21	+	36508934	36511519		TTTACAAACAAATGTTCTCAAGGGGCAGACAGCACACCCTTGCCTCATGACATTGCTCTA
ASHG19A3A041099	161.854	141.687	7.25675	7.22653	noncoding	ENST00000429601	RP11-368D24__A.1	Ensembl	487	chrX	+	64808277	64820630		GGGAATCTTTTTTGCAAACAAAACTCTGGCCCATTAAGAACTCTCTGCTGCCTTGTGAAG
ASHG19A3A050192	676.339	733.963	9.30926	9.6087	noncoding	uc010tgn.1	XTP6	UCSC_knowngene	1348	chr13	+	50656413	51102670		TGCTTAAGAGGCATCACTGGAATCCTACGGTACCACAGACCAGAGCCTTCCCTTCCCTTC
ASHG19A3A030889	255.476	134.956	7.91603	7.15809	noncoding	ENST00000437718	RP1-90J20.2	Ensembl	484	chr6	+	2917127	2917967		ACAGAGACCCAAATAACATTTGAATTGGACTCTACCTGCAAGTGGAGCTTTACCATCCAG
ASHG19A3A048313	143.059	118.68	7.075	6.97291	noncoding	ENST00000425194	RP13-614K11.2	Ensembl	937	chr1	-	4007208	4009040		AACACTGCTTTCACTGAGTGTATGAAGTGGTTTCTCCATCCGTGTGGCTTTACCTGAACT
ASHG19A3A030986	427.704	532.153	8.64764	9.15126	noncoding	ENST00000419796	RP11-716O23.1	Ensembl	699	chr6	+	11417582	11481472	uc003mzy.2,	TCTAGTAGTTCTTTCATCTCAGTCTTTTGAAAGCAACTTCCCCTCTTTAACCAACACCTG
ASHG19A3A011792	813.012	605.343	9.5798	9.33139	noncoding	ENST00000449215	RP11-344F13.1	Ensembl	282	chr1	-	14548385	14549613		TTATTCATGACCTTCATCTACCTTCCCTTTCATCAAGTAAATGGAAATGTGTCATTCTGA
ASHG19A3A036854	145.688	157.921	7.10332	7.38709	noncoding	ENST00000445072	RP11-373J16.1	Ensembl	784	chr1	+	188874818	189006393		CCCTGTTCTTATTATGCAAAACGTAAGAACTATCCTTTTCCACCATCTCTTTGAAAAATC
ASHG19A3A013245	129.217	120.212	6.93454	6.99273	noncoding	ENST00000414795	AC017076.5	Ensembl	506	chr2	-	6969010	6980595		CATCCAGTGAAGACTTCCTCTGGATTATTGCAGCAGACACCTCTAACCTCCTTAATCTGT
ASHG19A3A043590	242.018	438.529	7.8343	8.87328	noncoding	ENST00000456526	RP11-428L9.2	Ensembl	677	chr10	+	9012087	9015431		TAGATATATAGGAGGTTGTGGCTGCTCCAGCAGCTTGGATTCAGAGTGAGAAGGCATAAA
ASHG19A3A049881	89.1984	128.163	6.40281	7.08713	noncoding	ENST00000446989	AL845154.2	Ensembl	514	chr13	-	115095033	115099423		TGGTATTTGCAGATCCTCTCCAAAAAGAGTTCACCGATCTCCTAAGACTGCAAACCTGAC
ASHG19A3A017893	149.079	107.285	7.13873	6.82387	noncoding	uc002ydh.2	BC141903	UCSC_knowngene	221	chr20	-	61405787	61406753	ENST00000412500,	ACAGAGAGCTGCAGCCGATGCCGGCCGGTGACTTGGGACTTGGATGCTTAACAGGAGGCT
ASHG19A3A050252	159.815	123.018	7.23967	7.0262	noncoding	NR_002171	OR7E156P	RefSeq_NR	2647	chr13	+	64311567	64316701		ATTTACTGATTGTGTATTGGTGAATTGGTGCTGGCTCTCAGTTCCCGCCTCGCGGCGGGG
ASHG19A3A033489	882.442	578.438	9.69343	9.26825	noncoding	ENST00000491363	AC000123.2	Ensembl	4975	chr7	-	126999838	127004813		TCCAGTCTAAAATAGTTTTGGTTTGGATATTGTCTTCCATTAAAGTTTCAGTACGCAGAG
ASHG19A3A050135	117.032	124.667	6.79374	7.0455	noncoding	ENST00000420693	RP11-290D2.3	Ensembl	310	chr13	+	45924457	45925485		CAAAAGTCAATCACAATATCAGTTCCTTCCTCTACAGAGTGTTAAAAGTTTCTCGGCTGG
ASHG19A3A048491	1322.16	1287.29	10.2802	10.4169	noncoding	ENST00000414039	RP11-148B18.4	Ensembl	592	chr1	-	94784034	94790125		ATGTGTGATCCCCCTCCAGAAAAGACTTGAGTCTTTACAGTTGGAATTTCCGTGTCGTGA
ASHG19A3A051103	286.65	300.141	8.07854	8.31983	noncoding	ENST00000433081	RP11-458D21.1	Ensembl	814	chr1	-	145376124	145382397		ATGTATAGGACCATGCATGGTGATCTCCTCCAGACAAAAGTAAATGCTGGTGCAGAACAG
ASHG19A3A039325	1794.36	1960.84	10.7241	11.0316	noncoding	AK057050		NRED	1971	chr9	+	132267249	132269222		GTTTTATTTCTTATAACTGTACAGGAATCTACAATGATTGTAACAAAAATTTCAATTAAG
ASHG19A3A040464	141.589	117.728	7.06157	6.95946	noncoding	ENST00000456631	RP1-137H15.2	Ensembl	304	chrX	-	136638349	136646084		TTAGAAATGACCCTTGCCCTGATCTGAGGTGGAAGAAATAAAGGTCTGGTAAAGAAATGA
ASHG19A3A019380	118.448	125.409	6.80991	7.05446	noncoding	ENST00000435738	AP001476.3	Ensembl	355	chr21	+	47476429	47477481		TTTTACCAACAGAGAATCTCCAAATCCAGCCTTTTACCAGAAGCCTCTCCGAGAAACTGG
ASHG19A3A019881	217.882	216.192	7.68544	7.841	noncoding	uc003bcm.2	BC038245	UCSC_knowngene	1074	chr22	-	42760536	42765180		GTTTTCAGGTTTCTGCCTGACATTTAATATCACAAACATTGAGCCTGCTCCTGTCCCCCA
ASHG19A3A050013	174.07	166.767	7.35913	7.46632	noncoding	ENST00000435044	RP11-490N5.1	Ensembl	374	chr13	+	30728202	30728723		ATCTCGTCACGCTCCTAGTTTCCAAGCCCACACACCTGAGGGTCAATGTCCCTTATTGCA
ASHG19A3A016047	92.013	101.592	6.44975	6.74013	noncoding	BC105019		NRED	339	chr2	+	100825111	100865566	uc002taj.1,	CAGTCTCCATTCTCTCTTCAGGAAAGAGGCCTACTCGCAGATGAACGCACCAAGGCTCAG
ASHG19A3A044131	337.368	297.276	8.30963	8.30436	noncoding	uc001jxd.1	AK023445	UCSC_knowngene	1860	chr10	+	77056147	77121436		ACTTCTTTATGAAGGACTCCAGCCTGGTGGAGATGAATGAGTCCTGAAGATGGAATCGAA
ASHG19A3A017262	93.8577	103.952	6.47727	6.77677	noncoding	ENST00000418979	RP4-673D20.3	Ensembl	1372	chr20	-	1748605	1760643		AAGAAGAATAATGATAGGTCCTACACCCTGGAAAAGCTGCTGCTGGTGAATGCATCAGTG
ASHG19A3A040641	81.2314	93.8531	6.26516	6.62511	noncoding	ENST00000453953	RP13-297E16.5	Ensembl	548	chrX	+	1886239	1887669		AATGGGACCTATTTCACCTGGAGTGTCGCATCCACCAATATCAATGCTGCTGAAATGAAG
ASHG19A3A018374	62.1944	74.2603	5.87783	6.29333	noncoding	ENST00000424705	RP3-461P17.10	Ensembl	514	chr20	+	44076041	44076982		TCTGAGGATGCCCCAGACAGGGCCTGTGGCTGCTTTCTGAAATAGTGCAGCACCTTCTCT
ASHG19A3A007876	626.765	762.549	9.19477	9.66517	noncoding	NR_026951	C17orf44	RefSeq_NR	2115	chr17	-	8123948	8127361		AAAGTCTCAGATCAAGGATTCGGAGAAAGGTCTCTACAGGTCCCTCCTCGTTAGTATAGT
ASHG19A3A019379	142.97	164.67	7.07443	7.44586	noncoding	ENST00000429512	AP001476.4	Ensembl	415	chr21	+	47472509	47473019		TGGTTTCTCCACAGCCGCTGCAGCCACGAGGAGAAGGCCACCCTCTCGCGTTCAAACACA
ASHG19A3A014101	182.069	387.165	7.42408	8.68985	noncoding	ENST00000443030	AC092168.4	Ensembl	236	chr2	-	101338682	101339344		ACAACATCCCGACTCCATTCCAGAGCAGCTGGGAGCCTACAGCAGCCTAGGAATCTCCAT
ASHG19A3A039082	171.061	150.534	7.335	7.31874	noncoding	uc004bcy.1	AK093363	UCSC_knowngene	2054	chr9	+	109378338	109442079		ATTGTATCACATGGACTCGGTGTTGCCTCCTTATTGAAAGACATTTCCAGCCTTTGCAAG
ASHG19A3A029197	64.4814	71.6125	5.9324	6.24052	noncoding	ENST00000445662	AL583842.1	Ensembl	965	chr1	+	142553292	142559170	ENST00000424640,ENST00000418607,	CCACAGTGGGTTAGTGGATATTACAAAACCTCTGGTCCCACCTTATTAAGATGGAAAAAA
ASHG19A3A032464	241.778	118.031	7.83253	6.96423	noncoding	ENST00000451066	AC009473.1	Ensembl	692	chr7	-	7989483	7990340		GCTCCCACTTAGAGACTGCAATGTAAGGTATGGAAACAGAATATTCTCTATAGAAACATA
ASHG19A3A015864	1781.77	1414.74	10.7138	10.5512	noncoding	ENST00000453951	AC104135.4	Ensembl	1266	chr2	+	75167384	75169797		GGTAATAGCAAATGTTAACAGCCTGCTACCTCTGCACATCTTCCTTCCTTCATGATTTCC
ASHG19A3A054911	509.842	565.429	8.89666	9.2355	noncoding	ENST00000422253	RP5-968D22.3	Ensembl	519	chr1	-	168433451	168464882		AGAACAAGTCCTCATCTCTCCAAAGACCCTTCATCCTTCATTTCACAATAGTCTTTATTG
ASHG19A3A050372	116.541	102.952	6.78775	6.76241	noncoding	ENST00000446579	RP11-309H8.3	Ensembl	734	chr13	+	89925456	89932494		GTAACGGGATCAAACCCTTCTATTTACTTCTCCTTACTCATCCAAAGATGCAGTCAACCA
ASHG19A3A016105	1042.81	1072.98	9.9443	10.1504	noncoding	ENST00000438148	AC104655.3	Ensembl	415	chr2	+	105760599	105761882		ACAAGCTCTTAAACCCTCCGCCTTTTCCCCTATTGGTTAGAAAGTGAATCTTAAACTGTG
ASHG19A3A037608	264.141	259.814	7.9627	8.10478	noncoding	ENST00000424980	RP11-375O18.2	Ensembl	328	chr9	-	82120718	82147257		GCTTCCGTGCCCAACTTAGAACTACACATCTGCTGCCTCTTGGTAACATGTCATTATAAG
ASHG19A3A034015	206.753	330.728	7.60731	8.45941	noncoding	ENST00000417460	AC003986.7	Ensembl	692	chr7	+	19159555	19161539		TTACCTAACAATTTTCTTTTCCACATTTGCAAGGATGGCTCCCTTTTTACTTGTTGACAG
ASHG19A3A018434	925.51	951.017	9.7652	9.9768	noncoding	ENST00000411453	RP11-112L6.4	Ensembl	573	chr20	+	48789126	48793096		AATAAATATATGAAGAAATACAACCCCCTCGGGCAGTGCCTGGCACAGCATAAATGCCCA
ASHG19A3A054977	354.506	406.447	8.37973	8.76183	noncoding	ENST00000445428	RP1-206D15.3	Ensembl	1491	chr1	-	169411875	169429690	uc001ggd.2,	GTTTATAAAGCCCTAACTGTGCCGATGTTGACCGTTTTCTGAAACTCCTCCTCCAAAACC
ASHG19A3A026379	91.7971	94.0849	6.44669	6.62873	noncoding	ENST00000418344	RP5-1070A16.1	Ensembl	2229	chr1	+	98676302	98738214		TGCCTTTTCCTCTGCCAATGCTATGAGAATACCTTGGTTCACTAGAAGAAATGCTGACAG
ASHG19A3A020279	225.15	258.691	7.7295	8.09809	noncoding	uc003adi.2	CR936633	UCSC_knowngene	5051	chr22	+	27706611	27713416		GAGAGCTCTTAAACCAAAGGTCAGGACACACCCAGTGAATGTTTCCCTTCCAGATAAGAA
ASHG19A3A018086	825.453	756.572	9.60044	9.65268	noncoding	ENST00000429853	RP4-726N1.2	Ensembl	400	chr20	+	18040136	18051652		GGTGTCTCATCGTCCCCACCCCACTGTAATTCAAAATAAAAACAATGCTAAACCACAAAA
ASHG19A3A000194	134.62	154.893	6.98945	7.35955	noncoding	ENST00000429281	RP11-265P11.2	Ensembl	673	chrX	-	39164887	39186615		TGCAGTGGACCCTGTTGCCTACCCGAGTGAAGATAAGAATACCTATTTTAAAGTTCTGTT
ASHG19A3A015495	167.144	166.519	7.3011	7.46401	noncoding	ENST00000414054	AL121656.4	Ensembl	1794	chr2	+	33050509	33151760	NR_027098,	AGTCCTTTTGGGGACTAGAATAATTTCTAGAGAGCCACCCTTTCTACATGATACGGCGCA
ASHG19A3A029251	731.77	431.838	9.42282	8.8523	noncoding	uc001eiw.1	CR936796	UCSC_knowngene	4096	chr1	+	142618798	143257763		GGCAAAGGTTCAGACATACGACGTTTGTTTTTAAAATCTTTCTACAGCCTTGTATCCTTT
ASHG19A3A018644	353.205	70.5757	8.37359	6.21981	noncoding	ENST00000449602	AJ006998.2	Ensembl	1000	chr21	-	16742840	16774624		TTGCTATAAAGAGTAGGCAAATGGAAATCTTTCCCCAAAGGGCACACTGGGATTGTTAGG
ASHG19A3A038741	924.683	863.436	9.7642	9.8426	noncoding	ENST00000419576	RP11-561O23.7	Ensembl	416	chr9	+	70922308	70923361		TCACGCCTGACTAGAGCACTCTGCTTCACAGAGGGGCGTTCTGCGCGTTCTTCCTCCCTG
ASHG19A3A017807	109.924	72.1888	6.70655	6.25283	noncoding	ENST00000414598	RP4-583K8.1	Ensembl	431	chr20	-	51068002	51072158		AAGCAATTGGTTCATCAATGGGTTGGTAAGAAGCCCTCCAAACCTTAATTATCTGAGTGC
ASHG19A3A015678	838.339	710.873	9.61932	9.56085	noncoding	ENST00000454367	AC007250.4	Ensembl	813	chr2	+	58503011	58523683		TGAATGGGTCCCCTGTTTTTTCTCTTCTGCTCTTGTTGAACCATATCTCTGTTCCTTGTG
ASHG19A3A015282	89.5393	103.614	6.40799	6.77255	noncoding	ENST00000442864	U91324.1	Ensembl	447	chr2	+	8279531	8283399		GTGCCCCGTGAAGCCCTTGAACAAAACCAGAAGAAAGTGAAAAATAAACAGCCTTATACG
ASHG19A3A020169	1024.59	1072.46	9.91778	10.1498	noncoding	ENST00000412149	LL22NC03-2H8.4	Ensembl	524	chr22	+	22648097	22649159		ATCGCTGTAAGCCTGAACCCCAACCCTGGCTGCAGCCACCTGCCCTCCTAGTGCGGCCGC
ASHG19A3A030374	79.747	67.945	6.23841	6.16567	noncoding	uc010pbe.1	BC062745	UCSC_knowngene	1072	chr1	+	149230715	149232553		TTGTAAGAATGGCATAAAGCCGGTTTCTTGCGGTGGTTATATAATTTTCAGAATGTGTAC
ASHG19A3A014162	195.471	134.57	7.52658	7.15318	noncoding	ENST00000443123	AC006227.1	Ensembl	860	chr2	-	107871146	107982329		GTGTTTAAGAACATTTGCCTGTGCATGCATGTGTTTTCCTTTGCATCCCACAAGAGGAAG
ASHG19A3A040745	400.779	413.379	8.55541	8.78576	noncoding	ENST00000449605	RP11-147O5.1	Ensembl	7619	chrX	+	21911717	21920026		TTCTTTCATTCAAAGACAGGACTTACATGAGCCTTCCTTTCTGCTGTTCCTTTTCTTAAA
ASHG19A3A039320	743.05	1299.15	9.4471	10.4268	noncoding	ENST00000423122	RP11-65J3.1	Ensembl	545	chr9	+	132104121	132121817		TTCTTTCCCTGAGGACCATCTGGAGTGGACGCGTGCACTACCCCTCTCTGAATACACCCT
ASHG19A3A018101	91.3834	117.739	6.43885	6.96003	noncoding	ENST00000412571	RP1-122P22.2	Ensembl	415	chr20	+	19738791	19789926		TCGTCTTTGGGGCCACCGGTCGCCCCCGCCTCCGGGACCTGCGGGGAGGGCCCGCGAGAG
ASHG19A3A043571	442.894	426.358	8.69815	8.8313	noncoding	ENST00000448835	RP11-554I8.1	Ensembl	499	chr10	+	6660677	6667308		TTACAAAAGGATTTGGATACCTCATCTCTCCTGTTTCGCCAAGGTCTTGACTCATCGCTG
ASHG19A3A044674	973.364	1156.64	9.83774	10.2654	noncoding	ENST00000428814	RP11-432J24.2	Ensembl	297	chr10	+	134232586	134234457		GGTTTTCTGTTTCTTTGATTATAAAATAACCCCTGTTGGTGGGGGGAAAAAATTAGCAAA
ASHG19A3A017605	432.265	409.107	8.66446	8.77056	noncoding	NR_023919	HSPC157	RefSeq_NR	1039	chr1	+	22352041	22357713		TTCCTGGAGTCATTTGTGGGAGTTAGGGTCTTATCCTGATCTTTCCTCGTCCCCCGCTCC
ASHG19A3A013238	204.329	283.251	7.59099	8.23274	noncoding	ENST00000425125	AC017053.1	Ensembl	579	chr2	-	6453085	6465778		ATATGAAAAGGCTTTCCCAAAGAAGCCATGGAGTAGAATCCAGGTCTCCCAGTTCGTGAT
ASHG19A3A000203	976.345	1096.52	9.84248	10.1842	noncoding	ENST00000430772	NCRNA00182	Ensembl	708	chrX	-	73467698	73513362		CTGGACAAAGGAACAGGTATCTCAGATTCCCAGTTCTCAATCTTCCTTCCTCCTTACAAG
ASHG19A3A037206	99.9484	115.327	6.5737	6.92938	noncoding	ENST00000446754	RP11-321L2.2	Ensembl	689	chr9	-	23894987	23898054		GGCATTAGAAATCCTGGCGTTTTGCTGATGTTCTGCTTCTTGATGTAGATGCTTATACTG
ASHG19A3A008341	127.47	68.804	6.9148	6.18439	noncoding	ENST00000458070	RP1-35C21.2	Ensembl	546	chr1	-	177362814	177566844	BG196709,	AAGAAAGTGAAGATAACTGCAAGTCAGCTGGAAGTGCTGCCAAGATATGACCTCCAGGAA
ASHG19A3A031267	291.965	285.666	8.10637	8.24453	noncoding	NR_003948	HCG22	RefSeq_NR	5670	chr6	+	31021983	31027653		GACTCATCTCTTCTTTGTACTTATACCTGACTCAGTGTTGCCCTCAGTCCAACTAGATCA
ASHG19A3A019393	62.1214	113.763	5.87623	6.90859	noncoding	BC062773		misc_RNA	859	chr1	+	32320889	32321713		GGCCCCAGACTACGTCCTTCAGATGCTGTAAAAGTGATAAAAATTATATTTATCTCGTGG
ASHG19A3A043602	142.73	172.291	7.07223	7.51267	noncoding	ENST00000420825	RP1-251M9.2	Ensembl	537	chr10	+	11002113	11012779		TCTTCTTCAGGAATTGAACTGAATGTGCTGCCATCCTAGGCAAAAACTCCCAACTGACTG
ASHG19A3A044610	229.476	213.812	7.75637	7.8263	noncoding	ENST00000448347	RP11-282I1.1	Ensembl	831	chr10	+	125115965	125277224	uc001lhg.1,	ATGCTTGAAAATAAATGGCACCTGTGGAGAAAGTGCCCCATCCCTGATTATGTCATCGGA
ASHG19A3A022187	64.3743	73.5271	5.9296	6.27726	noncoding	ENST00000413093	RP11-8J9.6	Ensembl	488	chr1	+	47223946	47233300		TCTGCAAGTTTACCAAGCATTGCCACAGTGCTCTTCAGTTTATACTCCTCATAGAAATAG
ASHG19A3A009744	222.852	304.577	7.71563	8.3428	noncoding	ENST00000412360	AC102948.2	Ensembl	682	chr17	+	50939480	50976948		CATGACATATATTTGTATTTATGGTCCTCTGGAGAATCTTGCCTTTTCCCACCAATTTTT
ASHG19A3A013471	78.531	70.9137	6.21575	6.22646	noncoding	ENST00000416279	AL133249.1	Ensembl	418	chr2	-	32018891	32029049		AGCTGCTTACCCCTCACTGGGTTGTGGCATGAACAATAAATACACTTTTAAGATACTGAA
ASHG19A3A040892	134.303	83.5649	6.98673	6.45838	noncoding	ENST00000422047	RP11-245M24.1	Ensembl	639	chrX	+	45369728	45489447		TCCATGCCATGTGTGCCAATGGTAACCAAACCTTTCATCCTGACCATCACTAACTGGATT
ASHG19A3A015599	894.657	1032.08	9.71551	10.095	noncoding	ENST00000442821	AC009236.2	Ensembl	553	chr2	+	45395721	45396553		ACTGGAAGCTGTTTTATCACTTTGTATTTTGAGAACCGCTCCCTTTCCCGCACACGCATT
ASHG19A3A013193	91.4733	69.8234	6.44076	6.20533	noncoding	ENST00000445279	AC113607.2	Ensembl	694	chr2	-	895901	901137		AGTGCACCTTCCTCTCTTATTTTGTTTTATTTCCAGGGAAAGGGAAAGGAAGACATGCAG
ASHG19A3A010012	159.909	157.815	7.24103	7.38566	noncoding	ENST00000439041	AC061992.2	Ensembl	799	chr17	+	76311809	76343879		TCTTGCTGCAGCTGGGCCAGTTTGCTGACCTTCTCAGCTCCTTCTCTTAGACTGGAGAGG
ASHG19A3A020583	1874.98	1216.88	10.7884	10.3381	noncoding	ENST00000426112	RP3-439F8.1	Ensembl	2949	chr22	+	46937391	46944093		AAATTTGCTCGCCTGCACACCCAGAGAAATGGACTTGGCTTGGTTTTTCTGAACTTTTGC
ASHG19A3A013611	477.157	544.668	8.80563	9.18566	noncoding	ENST00000447571	AC079807.4	Ensembl	1808	chr2	-	48168834	48468122		ACTGGTTGAAGGAAATCCATGTTGGGCTTCTGTGGATGCTGGATTCTTTCCTTCTGAGAA
ASHG19A3A043022	2589.21	2738.63	11.2487	11.5031	noncoding	uc001kat.2	CR592318	UCSC_knowngene	1146	chr10	-	81451255	81586183		TTACTTCCATGGGATATAGTCTCCATAAGAGAGTAGTCATCATTGTATTTGTTGATGCTT
ASHG19A3A041491	70.9198	95.1577	6.06955	6.6441	noncoding	ENST00000445339	RP11-552D4.1	Ensembl	654	chr1	+	230138476	230142909		CCTTCCCTGAGAGAAGTGTATTTAATCTTAAATTCAGATGTTTGTTTGTCTACCCACTTA
ASHG19A3A043842	1033.3	795.722	9.9306	9.72396	noncoding	ENST00000421320	RP11-124O11.1	Ensembl	1714	chr10	+	43366968	43369508		TGTTGTGGATCTTTTCCCCCTTTTACCTTGGCTTCCAGGAAGCTCAGTGCCAAGTTTTAT
ASHG19A3A029461	112.418	182.446	6.73907	7.59561	noncoding	ENST00000450310	RP3-471C18.2	Ensembl	191	chr6	-	19690055	19753344		GAATATCCTCTAAAAGGCAGCTAAGCACTCGCTGTCTTCTTCCTTTTGCCTCATCAAGCA
ASHG19A3A017869	145.543	103.616	7.10126	6.77272	noncoding	ENST00000420710	RP5-827L5.2	Ensembl	500	chr20	-	59652279	59652872		TGCTTATGTTCCATTGGCCTGAACAAGCTACTTATCCAAGCCCTACTTCAGTGAGATGAG
ASHG19A3A049634	205.789	216.244	7.60077	7.84144	noncoding	uc010aeh.1	AK127969	UCSC_knowngene	3223	chr13	-	64402979	64418258		TCGTGGGGGTGCCTCCCCCCCTGGGATGGGGGTCCCAAGAGCCAGGGGGGGAAGAGGGGC
ASHG19A3A046574	186.51	213.714	7.46005	7.82551	noncoding	ENST00000439156	RP11-776H12.1	Ensembl	1796	chr1	-	61005920	61106163		ACCAAGTTTAGCCTGCCTTTGCTATTTTGGCGTATCTCCAATTCTTCATGATTTTCTCAT
ASHG19A3A019202	466.078	435.875	8.76974	8.86535	noncoding	NR_024351	NCRNA00160	RefSeq_NR	694	chr21	+	36096104	36109479		ACTTAAGCAAATCCTTAGTAAAGGAAAGAACCCAGCAGCCTCTCCTCAAACCAGTAGGCA
ASHG19A3A000239	99.952	70.9907	6.57379	6.22883	noncoding	ENST00000436162	XXbac-B33L19.3	Ensembl	1069	chr22	+	20325665	20350461	uc002zse.2,uc002znz.1,	GTGGCCCCTCTGAGGCATGAATCTAGAGCCATTGACACTGGAGAATGATACCTACCCTGA
ASHG19A3A033984	152.528	139.865	7.17121	7.20952	noncoding	ENST00000411542	AC011288.2	Ensembl	526	chr7	+	13141096	13743774		ACTTTGAGATTTTATGGATATGAAACCTGCTATCATTTAGCATCCTGCCTCTGGGAATAG
ASHG19A3A025152	289.283	309.038	8.09283	8.36349	noncoding	uc003gcl.1	AX747945	UCSC_knowngene	2165	chr4	+	1145159	1147489		TCCTCTTCTTCTGCCCCTTCAACTGCAGGCTGGAAAATTCATATGTTACCAGGAAAACAG
ASHG19A3A018638	763.051	645.772	9.48713	9.42661	noncoding	ENST00000455253	AF127936.3	Ensembl	743	chr21	-	16120065	16126186		TCTCCTTCCCTCTTGAAGGAGAAGCCTTGAGTTGTGCATCTTCTCTTGATTTTACTGAGG
ASHG19A3A019186	89.4529	86.8369	6.40678	6.51225	noncoding	uc002ytn.2	CR626360	UCSC_knowngene	2657	chr21	+	35303425	35343487	ENST00000427447,	TCTGTCACCTCTTTCTAAAAGCTGGGAAATGGTTATTGTCAACGCCAGCCCCATTTTGGA
ASHG19A3A048964	90.3224	74.1969	6.42029	6.29162	noncoding	ENST00000455771	RP11-347K2.2	Ensembl	439	chr1	-	103820968	103835986	ENST00000444810,	AAACCCAACCTGAATGTCCCCTAAAAGTGAAGAAATGTCCACACTTCTATGTGCAGATTG
ASHG19A3A013452	83.1608	97.734	6.29924	6.68288	noncoding	ENST00000452212	AC097724.3	Ensembl	726	chr2	-	28931818	28959071		AAGGAACTCTGAGCAGCTAAACTCTGACTAATCCCAGGGTATACCTGCGTTTTCTCTTCA
ASHG19A3A051692	300.802	301.485	8.1473	8.32709	noncoding	uc001xyn.2	BC036259	UCSC_knowngene	1375	chr14	+	90921672	90925248		ATTTTTGAGAAAACTGCCTCCTCTTTAGGACTTGGCATCCCCTAACCTGCATCAGGAAAG
ASHG19A3A014319	260.306	236.967	7.93972	7.96929	noncoding	uc002tpv.1	LOC151121	UCSC_knowngene	2213	chr2	-	129999745	130031421		AACTTTCCTACTCAGTGGTGCCTTATTGAAATGGAGCATATTCCTGCCACCCATAGGTTG
ASHG19A3A015568	181.023	130.384	7.4154	7.10989	noncoding	uc002rse.2	DKFZp781C08198	UCSC_knowngene	1809	chr2	+	42104694	42121185		AGTGGTGTTCCCCTTTTTTGCATGTATCAGGTATAATTAATCAGGTTGACATCACATATG
ASHG19A3A036878	373.702	226.234	8.45603	7.90322	noncoding	ENST00000417409	RP11-161I10.1	Ensembl	506	chr1	+	190449508	190463427		GGTCACCTTGCTTTCTTTGCTCTTGATTGTTTTCTAGCCCTACTTCTGTGACTACATTAA
ASHG19A3A050818	497.209	255.619	8.86144	8.08239	noncoding	ENST00000422129	BX571672.2	Ensembl	697	chr1	-	143118703	143194342	ENST00000513357,ENST00000451663,ENST00000428211,	CGTAAGAATTCCTACTTCAAACCTCAGACTTCAAATAACTGCCAGAACTACTTGACTGAG
ASHG19A3A019083	55.8185	90.2354	5.71791	6.56527	noncoding	ENST00000450653	AP000431.1	Ensembl	790	chr21	+	20418628	20420003		GCAGGTTTCATGCAGGAAACAAGTCTCCTGTTTTATGCTGGATCTCAGTACTCAACATAG
ASHG19A3A013207	61.0064	75.4143	5.84705	6.31535	noncoding	ENST00000457813	AC018685.2	Ensembl	368	chr2	-	2733679	2734729		AATGAAGAGATGAGAAGCTGGAGCTTCTTATGTGAAAAATAACCCTCCAGCCATGGCTGC
ASHG19A3A042921	96.5769	84.4279	6.52283	6.4743	noncoding	AK055023		misc_RNA	1974	chr10	-	72689681	72695453		ACCTCAAAACTGTTTCGGATGCTAGAAATCCATGGCTTAGAAGTTCCAGCCCTCCATGAA
ASHG19A3A013259	614.563	666.281	9.16714	9.47058	noncoding	ENST00000456681	AC007464.1	Ensembl	746	chr2	-	8064284	8418214		TTTAAAATATCCTTCTTTGAAGTCCATCCTGCTCTGCCCACTATTTGTCCCCGGTGGTCA
ASHG19A3A014831	910.378	1011.93	9.74221	10.0692	noncoding	AK055120		RNAdb	2021	chr1	+	4007904	4009925		TTGTACACTAATTTTGAGGACCTGGAGCTGGTTTTGAGGACCCTCCCTAGCAAGTACTTA
ASHG19A3A030126	797.569	888.561	9.55182	9.88019	noncoding	ENST00000413945	C6orf155	Ensembl	662	chr6	-	72054046	72129806		ACTCCACCCCATCCCCTTATTGAACAATTACGATGCCTATAAATATTGTATTGAGAAAGA
ASHG19A3A018649	179.357	226.262	7.40181	7.90351	noncoding	ENST00000443579	RP1-159A19.4	Ensembl	283	chr1	+	27852315	27857072		TCTGTGTGTCTGTCTACCTGGCAAGGAGATATGGCCCCCATCAGACTGGAGCTCCACAGA
ASHG19A3A038739	1243.48	1514.36	10.1938	10.6465	noncoding	ENST00000425587	RP11-561O23.8	Ensembl	340	chr9	+	70843566	70844228	ENST00000422178,	TTAATAACAAGAAATTAATGGTGAAGTGGTGACGAAAATTCTACATTGCTTAGAAAGCAA
ASHG19A3A038493	123.154	87.732	6.86686	6.52551	noncoding	ENST00000449144	RP11-384P7.5	Ensembl	1144	chr9	+	33719687	33722553		GGGTAGCGATTATCTGAATAATATGTGCTTCCTGTCTGTAGTGAGGTGTGAACATGGTGG
ASHG19A3A010958	105.728	95.5957	6.65204	6.65125	noncoding	AK096113		misc_RNA	2617	chr1	-	214157145	214159762		TTCTCCAACCCCACCCATCGTTTTGAGGGTTAGCATTTGGAGAGGCCGTGATTTAAAAAA
ASHG19A3A038311	145.931	289.213	7.10531	8.26253	noncoding	ENST00000427722	RP11-509J21.3	Ensembl	537	chr9	+	3674545	3691814		GCCAGAATTATTCATATGTCTCACTACAGGATGGGCCGGGAGTGTACCTTCATTATGTAG
ASHG19A3A018991	100.793	80.4569	6.58502	6.40604	noncoding	ENST00000434081	NCRNA00163	Ensembl	2155	chr21	-	46409778	46414001		CCTCTGGGCTTATAGTGGTTTTCTTTTCTACTGTCTGAAATTGAATGTTTAGTTCATCTA
ASHG19A3A016419	1739.13	2199.64	10.6832	11.1947	noncoding	ENST00000446520	AC069394.1	Ensembl	553	chr2	+	138859453	138863475		AAATGAACGAAGTCAAAATTATGCCCTAAGGCAAGCCTTCCCCTCCATGCTTAGAGCTAG
ASHG19A3A029434	193.2	161.976	7.51023	7.42394	noncoding	ENST00000437648	RP11-146I2.1	Ensembl	1017	chr6	-	14977018	15090234		AATTCTTGCGAGGATGAACTCAAGATACAAAATATGCTTGGCAACTCACCCCTGAGTGGC
ASHG19A3A050106	785.308	945.172	9.52755	9.96668	noncoding	ENST00000419514	RP11-366O17.2	Ensembl	192	chr13	+	43385972	43386428		TTTTTTTAAAAGCCACAGTTTCATTGTCTTAGTCAAAGCAAGATTATTACGTGATTATTT
ASHG19A3A018802	449.592	353.584	8.7215	8.55692	noncoding	ENST00000427911	AP000281.2	Ensembl	384	chr21	-	34216676	34222244		ATGCCTATGTTCACCTCTTCCACCTGGATGGATGCTGAGCTCTTAGAAATTGACTTTCCA
ASHG19A3A044240	958.354	704.726	9.81563	9.54918	noncoding	uc001ker.1	BC082979	UCSC_knowngene	888	chr10	+	89102678	89115182		ACCTCCATGACCCTGCCTCTGAGAAACCAGCGCGTCCGCAACGATCACTCCTAATTTTCG
ASHG19A3A030734	1121.14	969.977	10.0454	10.0071	noncoding	ENST00000453579	RP1-257I9.2	Ensembl	554	chr6	-	155701644	155702317		AAGCCTCCATTGCCCCTCCTAAGCCATGCTTTCCAGCACTGTAATAAAACTGGATTTTTT
ASHG19A3A039113	1050.33	1051.36	9.95421	10.1192	noncoding	ENST00000417084	RP11-6J21.2	Ensembl	917	chr1	+	207422411	207482466		AATAAGATAGACATGACCTCCTTCCTCCTGGACCTGACAATTGTTCCTTCAAATCACTTC
ASHG19A3A032568	569.159	613.303	9.05281	9.34966	noncoding	ENST00000412197	AC091705.1	Ensembl	209	chr7	-	25587381	25590682		GAAAAAGCTATTATTGAACTTCCCAGGAATCTCCCAGGCTGAGAAGTCTACACAATATTC
ASHG19A3A040430	465.912	475.589	8.76899	8.98937	noncoding	NR_024493	NCRNA00087	RefSeq_NR	2808	chrX	-	134229014	134232733		AGGAAAGTTCTTTGCTGATTGCATGTGTGATACAGTGGGGGGTGCCTGAGCCCTCCCCAT
ASHG19A3A055281	218.636	210.024	7.69047	7.79975	noncoding	uc010gei.1	BASE	UCSC_knowngene	558	chr20	+	31786003	31793009		GGAGTTTCTTCCCAGCTCCTTAATGCCTGCAGACAACTGGCCTCCAGAAACCATTGAGTA
ASHG19A3A044464	293.744	293.333	8.11317	8.284	noncoding	uc001kyk.2	BC036309	UCSC_knowngene	2093	chr10	+	107899923	107923511		AAACCTAACAAAACAGAAATGAACCCTTGATGAACCTCTTGCTCTGGACTGGTGCCCTGA
ASHG19A3A055266	6390.16	6970.09	12.5559	12.8441	noncoding	uc009wxq.1	BC039493	UCSC_knowngene	538	chr1	+	181143619	181151340		AAGGCCACTCCCTCCCCAGCCTGAGGAACACTCTACTGGTAAGGGGAGAAATGCCTCAAA
ASHG19A3A050214	7042.32	7618.01	12.7066	12.9682	noncoding	ENST00000446689	RP11-78J21.4	Ensembl	721	chr13	+	53063127	53073440	ENST00000424511,	GTTCTCCCCGACCCCATGCCCTTTTCCCTCATCTTTAATGAGTATCTGTATGTGTGGCAG
ASHG19A3A013365	454.153	371.368	8.73435	8.63042	noncoding	ENST00000421563	AC012506.4	Ensembl	541	chr2	-	23598099	23604170		TTGGAGTGAGACTACATCTCCCAGCATCCTGGCAGTTAGACAATTTTCTAGTCTCCTTTG
ASHG19A3A014418	146.931	257.558	7.11626	8.09242	noncoding	ENST00000458351	AC020601.1	Ensembl	1269	chr2	-	138636323	138683977		TTCTATGACTGCACATATATAGTCGCTTCAGAATAGAAAGCCGCTTTCTCCCTTAGCAAG
ASHG19A3A039319	129.77	206.946	6.94046	7.77951	noncoding	uc004bxt.1	AX747401	UCSC_knowngene	1772	chr9	+	132098802	132100574		TTTCCTAATTTGTCAGGATTTTAGGCCACATGGCAGCTGGGGGCAGAAACATTTCTGAGA
ASHG19A3A043054	139.371	93.3687	7.03992	6.61733	noncoding	ENST00000444137	RP11-475D12.1	Ensembl	403	chr10	-	87191698	87192271		TTACATTCTTTCCTCTCATCCCATTGCAATGTTTCCATGCTGAGAGGGCTCCAGAGAGAT
ASHG19A3A037039	1096.23	934.851	10.0135	9.95025	noncoding	uc003zfy.2	AY343902	UCSC_knowngene	581	chr9	-	100994	102941		GGACATATTTGTACCCCATCTCTATTTAATGCCTTTATACAATTCTTAATTCTACCAGCC
ASHG19A3A035081	142.56	131.191	7.07043	7.11876	noncoding	uc003vql.1	CR618431	UCSC_knowngene	1618	chr7	+	130538478	130613408		TAACAATATGTGCAGGCAGGACCGAAAAAAGGTGTGGTGCCTTCCAGCCCATAAATCAAA
ASHG19A3A015233	156.142	173.052	7.20484	7.51934	noncoding	ENST00000446593	AC093642.6	Ensembl	561	chr2	-	242989845	243026289		AGCAAAAACAAAACACACACATGCTCCTCTCAAGAGTCACTGGCATCCCAGCTGAAAAGT
ASHG19A3A043226	341.964	279.429	8.32678	8.21345	noncoding	uc001ksy.1	AX747408	UCSC_knowngene	2222	chr10	-	103012577	103023307		TTTCTTGATTTTAATCTTGGCAGCCACCCTCCATGACAGCCTTAGGTCTGCACATTCATC
ASHG19A3A030885	107.567	89.3382	6.67809	6.55207	noncoding	ENST00000440848	RP11-145H9.3	Ensembl	834	chr6	+	2637169	2640235		TTCTCTTTTCTCTCTTTCCAAAATCTGGACACACCATGGCCCAGTGATGGAGAAGAAGTC
ASHG19A3A018417	134.097	168.183	6.98493	7.47843	noncoding	uc010zye.1	LOC284749	UCSC_knowngene	3080	chr20	+	46994389	46999381		TGTCAGCGTAATCCAAAGAGGACACAAACACCCCTGCTATTTTCTTGTCACCAGGAAAAG
ASHG19A3A049511	480.397	332.708	8.81495	8.46812	noncoding	uc001uzl.2	BC025370	UCSC_knowngene	976	chr13	-	44974387	44980021		AGGTGTGCGGCATTGCCTCTGGGTCCCTGCTTTGGTTTAATTAAACTAAGTCTGGTGGTG
ASHG19A3A020324	488.803	449.431	8.83651	8.90968	noncoding	uc003ajj.2	TUG1	UCSC_knowngene	5561	chr22	+	31368248	31375377		TTAGAGTCCTGTGTTTGTAATTCCATGCATTTGTTATTTTACCTGTTTTGTCCCTGCCCC
ASHG19A3A019043	253.859	244.423	7.90578	8.0152	noncoding	ENST00000444356	AL050303.7	Ensembl	458	chr21	+	15142252	15144061	ENST00000422609,	TGAAACCTTAAACTCTTACTGATTCTTTAAACTGTCCCCATTCCAGTTTTCTCTACAGCA
ASHG19A3A019639	320.252	297.078	8.23674	8.30219	noncoding	ENST00000440477	RP11-46E17.6	Ensembl	770	chr22	-	27853207	27856021		TGATTATCCTTGTTCTGGTCCCATGTATACTCTGTGGGCTACTCCTTTTTACTGGGGGAT
ASHG19A3A018460	242.484	240.421	7.83735	7.99099	noncoding	ENST00000444112	AC005808.3	Ensembl	381	chr20	+	52224892	52251129		TGAGATGCTATTGCATGTGCAAGGCAAGGCTTTCTTCAGCGGCATCATCTTCCAAAATAG
ASHG19A3A031472	110.398	185.441	6.71207	7.61864	noncoding	ENST00000439844	RP3-503A6.2	Ensembl	400	chr6	+	38681826	38682993		GACAGACCTTTCAGTCCTCATTCCACATTGATCTGCTCTACATTCAAAGACTGACTTTCA
ASHG19A3A030761	299.162	296.368	8.13921	8.29844	noncoding	ENST00000446887	RP1-111C20.3	Ensembl	331	chr6	-	159485759	159486305		ATCTCACTATCAGTTTAGGAAATTCTCTGGTCTTCATGCTGGCTTCTGACCCTTGTGTCG
ASHG19A3A043851	261.989	493.59	7.95061	9.04582	noncoding	ENST00000442526	RP11-517P14.2	Ensembl	303	chr10	+	43916046	43917254		GAAGCTGTTTCTACACTCTCCTGAATGACCATTTTATAGATGCTGGGAAAAAATTGTATT
ASHG19A3A030839	386.177	360.597	8.50395	8.58878	noncoding	ENST00000445442	RP11-503C24.6	Ensembl	445	chr6	-	168700862	168702794		AAATGTTTGTTCCTGCAAATGCATCTTCCATCCTGGGTGACAGGAAGTGTCTGGTTCCAT
ASHG19A3A018676	289.507	316.502	8.09402	8.39615	noncoding	uc002yky.3	C21orf131	UCSC_knowngene	2124	chr21	-	22114913	22175426		TGGCAAAGGACGATGGCTGCTCTCCCGCTAACTTTAAATAAGTCATGTCACAAATTGCAT
ASHG19A3A055244	166.19	125.426	7.29395	7.05458	noncoding	uc003zpy.2	BC043546	UCSC_knowngene	1234	chr9	+	25780053	25812963		AAAGATAACACCCTCTTTCATCAGAGCGAGCGAGCTTTCTTCATGGTGGCAATTTCCAGT
ASHG19A3A000321	421.91	545.447	8.62554	9.18782	noncoding	ENST00000450248	TUG1	Ensembl	6477	chr22	+	31365642	31374831		AACTGAGGATGCTCCATCCAAAGTGAATTATGCCTACAGACCTGGTACCTGGATTTTTGC
ASHG19A3A039080	654.988	716.827	9.2623	9.57298	noncoding	uc004bcw.2	BC039487	UCSC_knowngene	1005	chr9	+	108870331	109173662		TCCTGAGATGGCCCCGGCCCTGTTCATGTTACCTGTGTGTTGCTGAGTGGTCTTCTGTTG
ASHG19A3A029323	183.382	141.037	7.43666	7.22046	noncoding	ENST00000420981	RP11-420G6.4	Ensembl	1588	chr6	-	2854890	2876744		ATAACCTTGCTTATGTCTGTTGTTGTATGTCTCAAATACCCTGTCCTCAGGAAGGCCCAC
ASHG19A3A038349	887.429	888.104	9.70481	9.87902	noncoding	ENST00000412339	RP11-390F4.10	Ensembl	422	chr9	+	6704470	6707780		AAGAAACGCGGAGACAGACTACTGGGACTGCGACGTCTCCTCTCCTGTTCGCTGCGATAT
ASHG19A3A043047	281.553	269.453	8.05337	8.16001	noncoding	ENST00000432108	RP11-219F10.1	Ensembl	309	chr10	-	85671409	85672678		TGTTTTGAAGGGGCTGGAAGTCTTTTCTGTCACCACCTTTACCTACCTGTCATCTGTGAA
ASHG19A3A030331	320.833	359.098	8.23949	8.58175	noncoding	NR_027354	LOC645166	RefSeq_NR	1104	chr1	+	148930404	148953054		GATTCCTTTTATCATTTTGTCCAAAGGCTCCACCTTCCTGAATATTACTGCTTTATACCC
ASHG19A3A055255	192.437	124.335	7.50481	7.0407	noncoding	uc004dvh.2	LOC92249	UCSC_knowngene	2713	chrX	-	62646438	62780873		GCAGTTGGATGGCGGTGACTGCGTGGTCCTGCAACCCTGGTTCCAGTCTGGCAAGCATTG
ASHG19A3A051325	62.6128	75.5428	5.88881	6.31783	noncoding	ENST00000425109	RP4-704D21.2	Ensembl	727	chr1	-	146473498	146475178		ATACAAGTTATAACAATGTAGCAATTGACCCAGCAAACGAGGACACAAACGTGTTGAAGG
ASHG19A3A007500	107.282	68.901	6.67399	6.18645	noncoding	NR_027312	LOC153910	RefSeq_NR	2293	chr6	-	142847591	142959026		CTTCTCATCAGCACGTGTCTACAGTTGCAAgttctcactctgtagcccagtctggagtgc
ASHG19A3A018465	96.7137	101.756	6.52527	6.74307	noncoding	ENST00000416190	RP5-1010E17.1	Ensembl	1340	chr20	+	54039580	54084752	BC041864,	AGACTGTGCCCCACACAACTCTGCAGCATAACCTTGCAGTATGAAAATAATGCCTCTCAT
ASHG19A3A000339	268.318	463.035	7.98639	8.95077	noncoding	ENST00000452637	RP11-403I13.7	Ensembl	695	chr1	+	149284644	149287106		CCCCCTTCGTGACCACGGTCTCTTTCCTGCCAGGGCACTGGCAACAGTTTTCCGTTTGTG
ASHG19A3A026922	122.799	179.582	6.86274	7.57345	noncoding	uc003kbl.1	AK123868	UCSC_knowngene	2767	chr5	-	70647681	70742169		TCATTTACTCACTGGGAACCTCGGAGGATTTCAGCTGATGTTTTTCTCTCCTTAGACAGT
ASHG19A3A050485	349.419	380.87	8.35736	8.66446	noncoding	ENST00000440735	RP11-365P13.3	Ensembl	684	chr13	+	111635653	111642911		GTGTGTTCCCTTGCCCTTAGATGAAGAAATGCTTTCAAAACCTCTGAAGATGCCTGAATG
ASHG19A3A007949	108.93	121.86	6.69493	7.01125	noncoding	ENST00000423323	AC015842.1	Ensembl	2998	chr17	-	13679950	13695867		GCCTGGAACTTAAAACAACGACAACAACAATGTCCAGATAAACCCAATAAAATAGGTTTT
ASHG19A3A030167	397.994	389.498	8.54609	8.69815	noncoding	ENST00000449463	RP3-390M24.1	Ensembl	387	chr6	-	79314183	79315753		GTGAAGATTTTACAGGTAACACTTCCTTTCCTTCCTTTGTTTTGATAACAGATGGAGATA
ASHG19A3A016126	302.163	351.812	8.15364	8.54974	noncoding	ENST00000413708	AC096669.1	Ensembl	616	chr2	+	107978774	108023785		TCTTTTTGTATTAATGCATCATGTGACTCCCTCGTTTGGACTTCTGCAGGAACATGTCAG
ASHG19A3A051630	5509.19	8369.66	12.3474	13.1028	noncoding	ENST00000447883	RP11-277L2.3	Ensembl	561	chr1	-	149576590	149577296	CR620599,	TCCTTCTGAATTCGGTCTTGCCTTGAACACATCCCCATTAAATAAATCCTTGGAAAAGAA
ASHG19A3A039361	125.34	88.2684	6.89033	6.53474	noncoding	ENST00000444708	RP11-323H21.3	Ensembl	829	chr9	+	134691578	134696375		GGTGGCAAAATGGTTTGTATTTTTGTCTTAAGCCTTGGACTTTTAAAATCCTGGATTTTG
ASHG19A3A030457	1124.97	1003.07	10.0516	10.0538	noncoding	ENST00000445225	RP11-277L2.2	Ensembl	5730	chr1	+	149576489	149651107		CATACTTACTTCTGGAAATATATGCCTTTCCTAAAACTTAACCACACATCCACTACCATG
ASHG19A3A019487	112.977	109.728	6.7453	6.85563	noncoding	ENST00000458154	XXbac-B33L19.4	Ensembl	446	chr22	-	20330725	20331888		AACTGGAAAAGTGGCCGTGTGGGCTGGTGCTTTGGTGATTTAATGAGTAAAGTCTACAAC
ASHG19A3A049948	402.985	365.018	8.56363	8.60803	noncoding	ENST00000443778	RP11-760M1.2	Ensembl	398	chr13	+	24044185	24060449	uc001uos.2,	TGCTCTTAATCCTCCCTTGGCGACCTTCTACTCAGACATCATCTTTTATGCAGAGAAGCA
ASHG19A3A017461	313.783	261.332	8.20674	8.11523	noncoding	ENST00000437696	RP11-359G22.2	Ensembl	565	chr20	-	22664299	22665982		AACTATACCAGTCCTCTGTTCCTGGTCTCTGGAGCTTCAATTTGGGAAAGTGACCCATTA
ASHG19A3A016422	147.587	90.0039	7.12225	6.56172	noncoding	ENST00000412593	AC114763.1	Ensembl	826	chr2	+	139228225	139231502		AAATAAAGCACACATTCCCTTTGGCACTAAATTTGACTCGGCAGCGTCTGTACAGGGATC
ASHG19A3A050377	98.4905	141.443	6.5506	7.22444	noncoding	uc001vlo.2	BC038529	UCSC_knowngene	1000	chr13	+	91145541	91187593		GTTTTTAAGATGCATCAGTTCCCCTTTCCAGCCTGAAGCCTCATCATCAAACAATGCTTC
ASHG19A3A040914	91.6337	153.409	6.44369	7.34577	noncoding	ENST00000366224	RP11-571E6.3	Ensembl	477	chrX	+	47157250	47158120		CATAAGTTCTGGGTCTTTATTCAGTTAGTTAACATTATTACCTTGTTCCCTCAACCATGA
ASHG19A3A018526	310.638	359.158	8.19365	8.58222	noncoding	ENST00000437035	RP5-1043L13.1	Ensembl	499	chr20	+	58755935	59102516		TTAAAGGGCCCCATTTCCCATTTGCTGCAGAAGATGTTTAATTGGAAGTCTCTCCCTGTC
ASHG19A3A019926	69.8934	111.509	6.04929	6.87976	noncoding	ENST00000454439	RP1-102D24.5	Ensembl	545	chr22	-	45831743	45844624		TTCCCATGGACTGGGCCTTTGCACACACATTGCACCAAATTCTCACAGCAGCCGAGCCAG
ASHG19A3A015595	1270.55	1670.27	10.2225	10.7903	noncoding	BC024156		misc_RNA	2195	chr2	+	45165058	45167235		AAATTCTCTCTCAACCTCTCTTTCTCTCTTCCCTCATTGAGATCACCAAAGTGGTGTGGA
ASHG19A3A042265	369.053	75.7635	8.43632	6.32231	noncoding	ENST00000440148	RP11-278H7.3	Ensembl	567	chr1	+	244270666	244272313		TAAAATATCTGGCAATTATTCTACAGGACATCGATCTAAATCCGCAACTAGCCTGCAAAG
ASHG19A3A043762	234.567	161.551	7.78834	7.42007	noncoding	ENST00000426067	RP11-253D19.2	Ensembl	378	chr10	+	30865627	30869111		TTTCAAGACCAGCCTGCTTTCAAGGTGTCAACTGATCGTGTAGACAATGTCTCAAAAAAC
ASHG19A3A039106	151.856	177.463	7.16532	7.55794	noncoding	ENST00000451108	RP11-410K21.2	Ensembl	635	chr9	+	113361754	113367499		ACAAAATTCATCCTCAATGCTGGTTACCTGCCCCATGCAGATGCTGGCATTTAAAATGTT
ASHG19A3A013690	126.162	163.547	6.8997	7.43566	noncoding	ENST00000420469	RP11-978I15.9	Ensembl	1638	chr1	-	247687980	247690054	NR_027309,	ACACACTTCCTGAAGTAAGATGCATTTCACAAAGCTCCCAGTTTCCAGAAGGATGGAGCA
ASHG19A3A042518	518.888	710.49	8.92268	9.5602	noncoding	ENST00000433460	RP11-275N1.1	Ensembl	439	chr10	-	21629161	21661879	DB068425,	AGTGAGTAAAGGGAAAATTTTCACTTCTTCCTATGGAAGCCTGTCACCCCCCAACTCCAT
ASHG19A3A049382	142.631	492.951	7.07092	9.04354	noncoding	uc001usr.2	CR592782	UCSC_knowngene	2567	chr13	-	30677365	30683005		TTGGAATGCATCCTCCACTTTAGCAAAAGAATTATGTGTTTTGTTTGCTCTTCATCATGT
ASHG19A3A032188	929.392	734.919	9.77018	9.61006	noncoding	uc003qmi.2	BC041998	UCSC_knowngene	2592	chr6	+	149539061	149544216		GCCCCCTTCTATTCATTATTTCCTGTACCAAACTCATTTTGTAAACTAAGATCAAGTCTA
ASHG19A3A007506	2538.47	3132.96	11.2192	11.6864	noncoding	NR_027355	LOC645166	RefSeq_NR	670	chr1	+	148928285	148951595	NR_027238,	CTCCAAGACCTCATCAACAATTAAGACTCTTTGGCAGTTGCACTGGGTACTGGCTGAGTT
ASHG19A3A018696	101.026	154.078	6.58778	7.352	noncoding	ENST00000446404	AP000402.3	Ensembl	540	chr21	-	26258989	26275070		ATATGACCCAAAATCCACTCCTCACTTGGACACTGCTCTGGTTATGATGGCTGACAAGAA
ASHG19A3A038936	211.867	159.498	7.64629	7.40218	noncoding	NR_027341	C9orf44	RefSeq_NR	2000	chr9	+	94903748	94921890		CAGGGAAGGGAAGGTAATTGAAAGTTTACAAAAACAAAACCCCATTCACATTCTTAAAGT
ASHG19A3A017276	118.473	110.457	6.8106	6.86512	noncoding	ENST00000435552	RP3-340N1.6	Ensembl	480	chr1	+	20569587	20571148		AGGAGAGAGTGACCCAGTCAACATCCAGCCCCATCAGCATGTGACTTATCCAGCCCCAGT
ASHG19A3A049332	92.0688	113.376	6.45098	6.90428	noncoding	ENST00000415166	RP11-195M16.1	Ensembl	450	chr1	-	110426797	110428886		CAAAAAATAAAAGACCAGAAGCCAGTGTTTAGGCACAGTGGATAGGACATTCCCTACCCC
ASHG19A3A016048	474.218	659.052	8.79499	9.45515	noncoding	ENST00000441036	AC104782.3	Ensembl	581	chr2	+	100859092	100865724		ACAGAAAATGCTGTGCTGGCCTGGCCCTCCCACAAACACTCCAGTTTCACGGGCTGAAGA
ASHG19A3A009077	116.387	123.944	6.78574	7.03723	noncoding	ENST00000434300	RP5-1011O1.2	Ensembl	396	chr1	-	192486768	192536347		CAATTATTCTCCTGTTTTATCCAAATTATTCCCTTCTGCAAGACTCACATCAAGTACGAT
ASHG19A3A055179	87.8061	110.679	6.37829	6.8679	noncoding	uc002zgn.1	BC046564	UCSC_knowngene	744	chr21	-	46411186	46414001		TCACCTGACAGGCTCACCAGAACCAGCACAGCTGCTGAGTTTTGGCTCCCGGACCCTGGA
ASHG19A3A030868	92.8683	96.8971	6.46316	6.6699	noncoding	ENST00000458006	RP3-416J7.3	Ensembl	751	chr6	+	155134	156639		AACAACACGTGTCCCTGCAGTTTGCTGAATTTCAGGGCATCACCACCTTTTTTCAAGAGT
ASHG19A3A032368	112.537	92.5352	6.74057	6.60336	noncoding	ENST00000465755	AC093627.7	Ensembl	759	chr7	-	70971	71835		TTCTGTGGGTGGATTATCTCTCTGGATCTTTCTAAGTGAGTCCTGTGTTTCACCACAGCT
ASHG19A3A020108	180.213	243.083	7.40809	8.00796	noncoding	ENST00000424052	XXbac-B444P24.8	Ensembl	2183	chr22	+	20186295	20192440		TGGTTTAAGTTATTTTCTGTCAGCATCAACTTATTCCCCAGCCCATATCCGCAGGCCTCA
ASHG19A3A013546	103.286	108.837	6.61825	6.84518	noncoding	ENST00000423797	AC006038.4	Ensembl	603	chr2	-	42592809	42652228		CAACTCTGTGCCACATCCTCTTCATTTTAGAATCCAGGATGAAGGATATGCCCTTATCTG
ASHG19A3A043896	943.921	900.83	9.79484	9.89922	noncoding	ENST00000441923	ANTXRL	Ensembl	634	chr10	+	47658248	47665128		ATAATGGGGAGCCATGAGTCCCTGGGGCCCTACTTCCTGGTCTTCCTGCTGCTGCTGCTG
ASHG19A3A018515	439.93	354.411	8.68843	8.55948	noncoding	ENST00000443747	RP11-164D18.2	Ensembl	566	chr20	+	58090245	58091094		AATAGAAAGTAATTCTCCATGTGTCTTCCTCCAGCTCCAATCTAGTTTAAAACCATCCCC
ASHG19A3A032065	3871.51	3301.91	11.843	11.7633	noncoding	ENST00000454262	RP11-102N11.1	Ensembl	335	chr6	+	131018456	131018923		AACCTCCCCCTTATAAATAAGAAGAGTCATTCAGAAATAGAGTGTTGCAATGAAGTCCCT
ASHG19A3A013311	200.63	229.61	7.56193	7.92564	noncoding	ENST00000422415	AC010145.4	Ensembl	517	chr2	-	16137170	16203007		ATGCCTCTCAAGGCTCCTTTTCCTCCTTACAAACAAAATAAAACAAATCCTTCCTATGGA
ASHG19A3A042655	170.705	144.514	7.33114	7.25687	noncoding	uc001jah.1	AK123067	UCSC_knowngene	1298	chr10	-	43169007	43187207		ACCTTGGAGTCTCCAGTTCACTGAAACCTGTCACTGCCACCCAGTGGCCACCATGACAAG
ASHG19A3A051145	77.8343	75.325	6.20233	6.31292	noncoding	ENST00000448840	AL132709.1	Ensembl	520	chr14	-	101540300	101544008		AAGTCCTCCGACTCTGAAGGCCATACCCAACAGGTCCCATTTTATTTGTTTTACTTTTTT
ASHG19A3A038183	158.115	92.4617	7.2245	6.60167	noncoding	ENST00000417135	RP11-145E17.2	Ensembl	743	chr9	-	137185776	137187243		GGGCTCACTGGAGTGCAAACTGCTTTCACTTGTTTGAAATGGAAATTTTTTCGTCTCTTT
ASHG19A3A049414	749.685	788.72	9.45921	9.71155	noncoding	ENST00000421002	RP11-380B4.2	Ensembl	903	chr13	-	33451568	33485788		TGAAAGTGGACATTTTTGCCTTGACAACTCCATCTGCTCCTCCTCTATGAAAGCTCCATC
ASHG19A3A040030	202.268	134.981	7.57565	7.15825	noncoding	ENST00000431637	NCRNA00210	Ensembl	1586	chr1	+	218066242	218094146		ATTAAATAGTGATGCTACCCAAATCCAGGCTTGTCCTGTGCTTGATGGCTGCTGCTATTG
ASHG19A3A040180	671.399	836.61	9.29859	9.79594	noncoding	ENST00000456301	RP3-341D10.4	Ensembl	3216	chrX	-	100258820	100262962		GAAAGTTTTAAAATCTTTTTCTCCAACTTGGGCAATATGGCAAAACCCTATCTCCACAAA
ASHG19A3A018479	180.319	192.035	7.40896	7.66776	noncoding	ENST00000437350	RP5-843L14.1	Ensembl	298	chr20	+	55171365	55173677		TTCTCTTGTGCCCCAATTACCACATGCGTCATGGGGAGAAGAGCTTGAACCCCCCAGAGG
ASHG19A3A044506	106.449	102.172	6.66195	6.7501	noncoding	uc001aio.1	AK054708	UCSC_knowngene	1954	chr1	-	1944651	1946969		ATTTATAAAATGCCGTGATTCAGGTCTCAGGGCACTGTCGCCCCTACTCACTTTGATGAA
ASHG19A3A007100	912.788	1098.27	9.74564	10.1861	noncoding	NR_002323	TUG1	RefSeq_NR	7115	chr22	+	31365633	31375377		AAACTGAGGATGCTCCATCCAAAGTGAATTATGTCCTGTGCCTCCTGATTGCTGAGTGTT
ASHG19A3A039563	96.2185	95.0261	6.51605	6.64212	noncoding	ENST00000438499	RP11-1M18.1	Ensembl	517	chrX	-	6585905	6639585		TAGAGATTAACCCTTTCCTGGAAAATGAACGTCTATTGCTTCTTTTGGGGACAGCATGCT
ASHG19A3A019258	149.004	91.2073	7.13805	6.58018	noncoding	ENST00000416842	AP001042.1	Ensembl	487	chr21	+	40218170	40220568		AGACTTGGGCAAACTCTACTCCTCAATTTGTGGAAAAATCTCAGTATTGATCTATGCATG
ASHG19A3A038559	4474.09	2848.01	12.0524	11.5588	noncoding	ENST00000429493	RP11-220I1.1	Ensembl	4375	chr9	+	37079892	37090398		GGATCTCAAATGTGGGAAGGATTGTTATATAAGACAACCAAATGATGACATGAGACAATA
ASHG19A3A024207	82.5198	79.0277	6.28884	6.38146	noncoding	ENST00000425517	RP11-424D14.1	Ensembl	627	chr1	+	69521580	69650686		GGATCACAGAAAACACCCCTACACCAACTTATAGCCAATCTATTCAACCTGCATTGTTAG
ASHG19A3A050871	128.248	110.027	6.9235	6.86007	noncoding	ENST00000418607	BX004987.7	Ensembl	964	chr1	-	143527404	143533272	ENST00000445662,	CCACAGTGGATTAGTGGATATTACAAAACCTCTGGTCCCACCTCATTAAGATGGAAAAAA
ASHG19A3A035290	93.7446	127.081	6.47536	7.07519	noncoding	ENST00000417506	AC004941.3	Ensembl	3120	chr7	+	149095294	149098547		TTCTGTGCCAATCTTTATTGCCTGAGTCCCCCAGCACCCAGACTGCTGAAATTAAAAGAT
ASHG19A3A031190	1331.29	2001.57	10.2927	11.0587	noncoding	ENST00000444986	HCG14	Ensembl	413	chr6	+	28864306	28865099		ATGTTTACTGAAATCTTGATCGTGGTTAGCCTCCCCCAGGACTTCATTGTTTGGAAGATG
ASHG19A3A050860	59.9184	97.6963	5.82258	6.68227	noncoding	ENST00000443548	BX004987.4	Ensembl	681	chr1	-	143356064	143467532		GGGGGGCCAGACCAGTGTTCCCCATTTGTGGGGGCAGACGCGTGGGCGCATCGCGGGCAG
ASHG19A3A019498	94.6682	129.901	6.4928	7.1049	noncoding	ENST00000412656	AC011718.2	Ensembl	727	chr22	-	20640967	20661407		ATCATTCCAGACATACATGCAGATGTTGGAACTCCCTTGCACAGTGACTCATGATCCCAA
ASHG19A3A031944	495.146	313.527	8.8544	8.38271	noncoding	ENST00000444259	RP5-1112D6.4	Ensembl	557	chr6	+	111599134	111599945		TTAGAAAAGGAAAAGTTTACCTGCAAAGAGAGCAAGAGAATGACTGGCTTGCCTAATAAA
ASHG19A3A032137	378.278	334.186	8.47515	8.47301	noncoding	uc003qis.2	BC038188	UCSC_knowngene	1351	chr6	+	140297466	140414856		GCTTTCTCTCTCTCCATGCTCAGGTACTGAGGAAAGATCATATGAGCACACAGCAAAAAG
ASHG19A3A042680	136.821	237.007	7.01356	7.96949	noncoding	ENST00000437014	RP11-20J15.2	Ensembl	841	chr10	-	44755049	44757261		TAAGGAGACCAAGACATTGTGAAAACCAAGTGTCTCCCACCTTGCCAGGACCTATAAAGT
ASHG19A3A038558	1331.83	1073.31	10.2933	10.1518	noncoding	uc003zzp.1	BC067112	UCSC_knowngene	1868	chr9	+	37079993	37087992	ENST00000429493,	AAACAGCATCCACAGCTATTTTGTGTTGTTTCCCTGACCCCACCCTGAAGAAAAGAAAAA
ASHG19A3A009075	118.479	80.4354	6.81064	6.40568	noncoding	ENST00000428569	RP11-541F9.1	Ensembl	583	chr1	-	191827892	191859359		GATGTTCTTTTTCTTTCCCCCGGCCAGGGATCTGAAACTAACTCGGACTTACTTGAAAAG
ASHG19A3A007950	326.029	384.036	8.262	8.67757	noncoding	uc002goc.1	AK123263	UCSC_knowngene	2800	chr17	-	13680148	13695867	ENST00000423323,	GGCAGAATATTTTGTTCCTTTATGGGTCAGCCTGGGATACAAAATTAGAGAAACTTTGCA
ASHG19A3A055162	162.258	241.647	7.26062	7.99899	noncoding	uc002rop.1	LOC285045	UCSC_knowngene	868	chr2	+	33066079	33162270		GCTCCTGACCCATGCTGGGCCCTCAACTTAATTGCTGCCTAGAGCTCATAGAAGGATCTC
ASHG19A3A016447	281.086	145.392	8.05065	7.26661	noncoding	ENST00000414967	AC062031.1	Ensembl	747	chr2	+	146672657	146688714		TAGAACTCTCACATTTGTTTTGCTGGTTCACTCTGCCCGTGTTCTACAAAAGCCCCAGTT
ASHG19A3A032310	449.706	446.84	8.72194	8.9025	noncoding	ENST00000452944	RP1-230L10.1	Ensembl	719	chr6	+	164124935	164180873		GTTGTTTCCAATAGTTGACTAGTTTTCTTCCCCAGCACTTACGAGTACACAGCCAGTCAC
ASHG19A3A020113	280.359	281.688	8.04673	8.22504	noncoding	ENST00000426653	AC023490.2	Ensembl	853	chr22	+	20377668	20378803		ACGTGCAGGAGATGGGAGGGCCTGTCTCTTGGTTCCTCTCGGAAGTCCTGCCCTTGTCCT
ASHG19A3A037200	209.2	215.301	7.62581	7.83494	noncoding	ENST00000435092	RP11-408N14.1	Ensembl	443	chr9	-	22203988	22214671		TTCTACGTGTTTGTGTCTTAGATCTGTTAAACTCAGCTGACCCACCACACCCAAGCAGAA
ASHG19A3A008245	532.304	312.309	8.96211	8.37754	noncoding	ENST00000426575	RP11-318C24.2	Ensembl	657	chr1	-	175873897	175889649		CCTGGCTGTTCTGTTCATGACGGTGGTTATTCCAATTACTTTGAGAATTATATTTATTAG
ASHG19A3A016127	145.152	109.459	7.09648	6.853	noncoding	ENST00000443205	AC096669.3	Ensembl	1539	chr2	+	108145942	108172782		ATTTTCTAGGTTTGGGACCTCTGCGTACCTCCTGTGGCTTTATGGTACCTGGTATTGTTT
ASHG19A3A055143	118.652	81.3054	6.81231	6.42151	noncoding	uc002jix.2	AK000477	UCSC_knowngene	1697	chr17	-	70380461	70588943		CACAGTTGTATGCCATCATGCCCAGACCAGATTTCGCCATATTGCTCAGGATGGTCTTGA
ASHG19A3A044648	204.193	163.832	7.59012	7.43836	noncoding	ENST00000446589	RP11-442O18.2	Ensembl	450	chr10	+	130711142	130714535		TAAGAAACTCTTATGAAGTTGTCGGGGTTCAAGTTGGCCTTCCTGTTGTTCAACCTGGTG
ASHG19A3A036889	1886.72	1762.33	10.7962	10.8741	noncoding	ENST00000434983	RP11-309H21.2	Ensembl	299	chr1	+	191190288	191197597		ACTCTTTCCCCTCCCATTTACTTGATTTACTTGTTCTCCAGGAAAAGGCAACATGAACTC
ASHG19A3A048738	109.385	104.573	6.70031	6.78545	noncoding	ENST00000417659	RP11-206L10.5	Ensembl	295	chr1	-	694411	700305	uc001lnz.2,NR_029401,ENST00000499986,ENST00000447412,ENST00000438487,ENST00000431663,	TTTCTACTAATGGAATTCCTGGCCTTGAGAGGATGTTACTTTAGAAGGAAAGGATTTTTT
ASHG19A3A039137	563.777	497.094	9.04086	9.05619	noncoding	ENST00000437712	RP11-168K11.3	Ensembl	3043	chr9	+	116381507	116384914		TGAATGTCCCCCAAGCTGCTTAGCCCTTGTGTCTGCTTTTAAAAGTTCTGCTTTGCTTCT
ASHG19A3A018527	112.797	123.319	6.74341	7.03038	noncoding	ENST00000441660	RP5-827L5.1	Ensembl	391	chr20	+	59654195	59655235		TCAGAGCAAAATGGCCTGCTCTTCAATGTAGCTTAGTTTAGTTCAATTGTCCTGCCCACC
ASHG19A3A032523	311.278	388.662	8.19552	8.69501	noncoding	ENST00000418764	AC004543.2	Ensembl	655	chr7	-	19853307	19871039		TGATCATCATCCTCTCTTCTTCTCCACAAGCTCAAACACTTTCAGTGACTGATTTGAAAC
ASHG19A3A044282	1078.63	935.323	9.99024	9.95162	noncoding	ENST00000412362	RP11-236B18.2	Ensembl	380	chr10	+	92754376	92766147		TCTTTGCTTCTCACTTCCTGTGCCTTCTCCCAGAGAAACGGAGCTTTTGGAATTCTTTCA
ASHG19A3A015734	423.741	472.793	8.63364	8.97901	noncoding	uc002sdd.2	BC041356	UCSC_knowngene	1720	chr2	+	64834494	64843614		TTGGAGAAGACTGGAGCCAGCCTTGCCTTCTCCTCTCCTGAAGGAATGGATACATGAATG
ASHG19A3A038307	983.479	760.762	9.85654	9.66129	noncoding	ENST00000452746	RP11-32F11.2	Ensembl	886	chr9	+	3181588	3198517		CAAACTACTTGATCACATTCCTCCTTTTGGTTTTGCTTCCTCTACCTGTCAGTTGTCCTG
ASHG19A3A034585	159.803	142.002	7.23954	7.2298	noncoding	ENST00000450820	RP11-335G20.5	Ensembl	777	chr1	-	25579797	25594376		TTTTCACTGCAATCAGCTGCTCCAACTTTGTCTTGTACATGGCTCTTTGACCTTGGGCTT
ASHG19A3A040642	700.213	655.137	9.36267	9.44556	noncoding	NR_033380	NCRNA00103	RefSeq_NR	2915	chrX	+	2527305	2575270	NR_033381,	ACCCGGCCCGTGGGGGAGGTTCCGTCCCGCCGCCTTCGCCCGCGCGCTGCACTCGCGGAC
ASHG19A3A009341	64.0867	65.0131	5.92288	6.10292	noncoding	ENST00000429469	RP11-553K8.2	Ensembl	363	chr1	-	198566853	198567998		GATCTCTGAGTGACTACAGTGAACAAAGAAAGAAAGACTCCTGCCAAACCTTGTGGACAG
ASHG19A3A030338	70.4772	91.8464	6.06057	6.59227	noncoding	NR_015365	LOC553137	RefSeq_NR	2491	chr6	-	107218006	107222877		TAGGAATAAAGGCAAAACCAAGATAGGCCCACCCTGACAAAGCCTAAAACCAACTCTTCA
ASHG19A3A042773	87.1555	66.395	6.36592	6.13221	noncoding	ENST00000448134	RP4-811H24.9	Ensembl	687	chr1	-	32814794	32816264		TTTCTGTGTCTTTTTTGTTTGTAGTCTGTGATCCTGGGAGCCCTGGGGCCAGTTTAAACA
ASHG19A3A038487	609.888	425.204	9.15791	8.82753	noncoding	ENST00000433357	RP11-255A11.21	Ensembl	902	chr9	+	33602498	33605291		AGCTGGTCTGGCCCTGGACGTGCCTTCAGGTGCTGGTTATGCTTTATGACCTGTGTTGTG
ASHG19A3A020278	97.0064	114.478	6.52935	6.91808	noncoding	ENST00000449126	CTA-929C8.5	Ensembl	274	chr22	+	27672200	27682310		ATCTGTTTGAAGAGGAAAGCAAATGGCAGAGCATCTCACCTCTAGACCAACTGACCTTTG
ASHG19A3A012647	270.825	298.039	7.99899	8.30819	noncoding	ENST00000451766	RP11-443B7.1	Ensembl	426	chr1	-	235095412	235105809		GACAGCACTTCCTCATTAAATGCAGAGATCTGCAAAAAGGGAAAATAAAAACACAAGAAG
ASHG19A3A007962	668.437	680.109	9.29203	9.49638	noncoding	ENST00000431343	AC005703.3	Ensembl	1773	chr17	-	15170777	15175607		ATTTCTCTTCAATGTTGGCTTCTATGGATGTTTTCTGTTCCCTCTTCGCTGGCCTGGAGT
ASHG19A3A049850	639.383	756.959	9.22504	9.6538	noncoding	ENST00000413637	RP11-315H15.1	Ensembl	657	chr13	-	112976880	112985539		GAAGGTTTTCTAACCTTCTATCAGATTTTCTAACCTCCCCAAGCCACAGGATGAGAAAAG
ASHG19A3A039326	346.128	269.501	8.34321	8.16036	noncoding	uc004bya.1	BC037833	UCSC_knowngene	2449	chr9	+	132337687	132346835		AGAGAAACCCAGCAACGCTACTTTCTAAGGGCATTTTTCCCTCTCATTTGGAATCCTGAG
ASHG19A3A017887	145.994	241.459	7.10601	7.99762	noncoding	ENST00000427132	RP13-30A9.1	Ensembl	499	chr20	-	61265032	61266856		AATGCACGTTCCAGGGCCCTCTTTCAGCCTCTCTCAAGCCTGAATTTGGGAAGACTGCGG
ASHG19A3A042352	58.7809	101.392	5.79349	6.73762	noncoding	uc001igo.1	AK097474	UCSC_knowngene	2097	chr10	-	2047666	2056542		TGCCATCACACAGAAGAGAGAACTTACCAAGCAATACCAACACATTCATTCTCCAATAAA
ASHG19A3A020072	108.39	178.73	6.68759	7.56753	noncoding	X91348		RNAdb	1284	chr22	+	18958141	19018742	uc002zon.1,	GCACGGTGTCCCTGGGTTGGCCACCCAGCTTAGTTTTAAAATAAAATAATGTAATCTTGG
ASHG19A3A043717	67.0812	83.1336	5.98796	6.451	noncoding	ENST00000436140	RP11-80K21.3	Ensembl	789	chr10	+	25401986	25406286	BC042983,	GTTTGAAAGTGGGCATCACTCTTGGGCTCCCACATTGACTGTAGTTTTACGGAATGTTTG
ASHG19A3A018454	136.002	139.571	7.00499	7.20707	noncoding	ENST00000454600	RP4-723E3.1	Ensembl	745	chr20	+	50827183	51263280		AAGAGACACGAAGTGATAAACCGAGCACCCTCTTTGAAGATTTCCCAGTATATTTGTCCC
ASHG19A3A049783	215.951	202.651	7.6716	7.74758	noncoding	uc001voi.1	AK123584	UCSC_knowngene	2796	chr13	-	100143728	100148992		TACTTTTCAAAGTCCTCTTCTCTGTTCCAGACCACTATGGGCAACTCTCTATCTATTCGA
ASHG19A3A019345	646.574	468.021	9.2438	8.96454	noncoding	ENST00000449713	AP001065.15	Ensembl	912	chr21	+	45905459	45910171		CTGGAATCTCGGAAGGTGAATGTCTGCCTTCGAAAACCCTACCACCTGTCTTTCTTGTGG
ASHG19A3A054980	5845.75	5188.44	12.4315	12.4244	noncoding	uc001ggd.2	BC041451	UCSC_knowngene	1707	chr1	-	169411876	169429907		ACTCCCTCCTTCTGGGTGTGCGGCTGAAGACTGGAAGCAGGTTGCCTTGCCTGCTGCAAG
ASHG19A3A031927	246.881	190.458	7.86248	7.655	noncoding	ENST00000458693	RP1-249I4.2	Ensembl	465	chr6	+	110147724	110149988		GTTTGGCCCCCTAGCATTTTTTATATGTTCTGTTGAGATAAGTATTGCTTAAATGAATCG
ASHG19A3A020282	292.625	260.131	8.10879	8.10637	noncoding	ENST00000417957	RP11-375H17.1	Ensembl	451	chr22	+	28112467	28117665		CATACTGTCTCGATTTCTATCTCTTCCTAAATGCCTTTTCCCAGCTTGATACATTAAAAA
ASHG19A3A009134	351.865	364.293	8.36748	8.60525	noncoding	NR_003261	CDRT15P	RefSeq_NR	1101	chr17	+	13927814	13928915		TCTGTGTTTGGAAATTCCAGTGGAAAGTGACTGATGCTGGTGACCCTTTCTCCTTTCTCA
ASHG19A3A000225	7971.05	6256.06	12.8873	12.6871	noncoding	ENST00000434593	RP11-557H15.4	Ensembl	534	chr6	-	134846462	134980974		gccgcagggacctctgcctaggaaagccagGTTGTCTGCCAACGCTAACTGGCCAGCTCT
ASHG19A3A007507	4357.9	4965.3	12.0168	12.359	noncoding	NR_027356	LOC645166	RefSeq_NR	592	chr1	+	148928285	148951595	ENST00000452399,	TGCGGCCAAGACTCCGTCCTGCAAGACTCTTTGGCAGTTGCACTGGGTACTGGCTGAGTT
ASHG19A3A045972	573.695	705.109	9.06633	9.54999	noncoding	ENST00000455671	AC051649.16	Ensembl	315	chr11	+	1923876	1929145		GCATACCTGATTTTCTCGACCTCTTTTATGAAATATCCCCGCCAGACTCCCTCGACCGTG
ASHG19A3A013913	535.403	542.078	8.97124	9.18005	noncoding	ENST00000450290	AC084193.1	Ensembl	769	chr2	-	80926512	81097315		ATCATTCCATTGCCTCTCGCTGCTCTGCTGTTGCTTTCCACCAGCGTAAAATCAATTAAG
ASHG19A3A018482	575.72	504.008	9.07269	9.07479	noncoding	ENST00000442780	RP11-560A15.4	Ensembl	377	chr20	+	55680796	55682184		AGATGGTTCAAGGGTTGTGTGTGTTTCCTCTGCCTGCTGTAATAAATTACTACAAACTAA
ASHG19A3A015888	68.9932	67.2048	6.02951	6.14907	noncoding	ENST00000448431	AC010744.1	Ensembl	303	chr2	+	83749937	83750626		ACACAGGCACAAAGCAGAAGCATTTTCTTCCACTTCAACAGAGCTCCTATGCCTAAACAG
ASHG19A3A016411	94.5962	103.27	6.49158	6.76719	noncoding	ENST00000448672	AC068492.1	Ensembl	469	chr2	+	136835461	136836083		GACAGTCAAAGAAATCATGAAGGTCTACTATATGTATTTCCACTCCTGACCTAACTGAAT
ASHG19A3A000088	254.857	372.668	7.9125	8.6352	noncoding	ENST00000411595	RP4-737E23.2	Ensembl	556	chr20	+	23168764	23170944		GCTTCAGCCCTTCTTGCTCTCCATGGCAGAAGTCCTAGCAGAGTATGCCCACGCTGGTTA
ASHG19A3A014184	21422.6	25323.6	14.3078	14.6931	noncoding	ENST00000426713	NCRNA00116	Ensembl	461	chr2	-	110969106	110970400	NR_027063,	GTTGAAGATGCATATAGACTACCGGAAAGAAATGACTTCTTCTTGCACTTTATGAATCAA
ASHG19A3A044373	123.504	97.14	6.87044	6.67313	noncoding	ENST00000452494	RP11-129J12.1	Ensembl	392	chr10	+	101286837	101288018	uc001kpt.2,	TAAAAATCAGCAATCCGCACAGAGCAGGCAGCCGCTTTGGTTCGAATGAATTAATTTGCC
ASHG19A3A044162	134.617	110.796	6.98938	6.8698	noncoding	uc001jzw.1	AK126491	UCSC_knowngene	3842	chr10	+	80027098	80159502		GGGCTTGACATAGGCTCTCTCATCTCCACACAGTTAATATGGTTTTACGATAAAACAAAG
ASHG19A3A044020	455.176	592.636	8.73698	9.30404	noncoding	ENST00000433152	RP11-222A11.1	Ensembl	744	chr10	+	67345445	67441220		GAGAACTACTCAAGAGAACAAAACCACCAGCAATATCCACCTGTATTTGTCTTTTCATAA
ASHG19A3A043515	84.2399	66.7656	6.31783	6.13959	noncoding	ENST00000438753	RP11-526P5.2	Ensembl	918	chr10	+	2543974	2609431		TAGAATCATTATTCCTGAAGGTTTTGCTGTCCTTTGCGCTCAGAGATGGTCCCACTGACT
ASHG19A3A019408	874.676	293.585	9.6827	8.28515	noncoding	ENST00000453395	LA16c-83F12.6	Ensembl	624	chr22	-	16199665	16231333		TTAGATGAGAAGCTCTGCTATGCAATCAAGAATCTCAGCCACTCATTTCTGTAGGGGCTG
ASHG19A3A028504	101.541	132.868	6.59526	7.1356	noncoding	ENST00000420156	RP4-543J13.1	Ensembl	332	chr1	+	114749048	114804900		AAGGCATACAGGGAAGTCTTACCCCCTGCAAAGTGATGAGCACTAGACATCCTTTTCTGT
ASHG19A3A043574	159.136	148.048	7.23367	7.29298	noncoding	ENST00000420049	RP11-393K12.2	Ensembl	436	chr10	+	7139113	7139637		TCAGTTGTGTCCTATTAGGTGCTCCGCTAACATTCTGCTTTCTCTTCTGAGCCGTCAATA
ASHG19A3A030965	177.5	219.484	7.38751	7.86286	noncoding	ENST00000429060	RP11-314C16.1	Ensembl	489	chr6	+	8784410	8785678		AGCCTCAAAGAGCGGTCTTGTTGACCCCAACTATATCATTTTTCATCAAAATCATTCTTG
ASHG19A3A049990	188.985	192.886	7.47754	7.67491	noncoding	ENST00000431171	RP11-125I23.3	Ensembl	580	chr13	+	27947484	27948503		TAAAATGGGGCTCATTGAATAAGGCTTACAAAGATGATGAGCTCCTGCCTGGGTTTGCAC
ASHG19A3A040676	99.6892	89.1632	6.57058	6.54868	noncoding	ENST00000454113	RP6-1O2.1	Ensembl	611	chrX	+	10210378	10333363		ACCTGCTATTTTGCTGCTGAGGTTTCTTCTGGGCCTATATGACATGCCCGTAATTTTGAG
ASHG19A3A043468	508.173	481.913	8.89191	9.00841	noncoding	ENST00000424193	RP13-137A17.4	Ensembl	2619	chr10	-	134757470	134778928		CTTGGATTTGGGAAATCTCTTACTACATTATGTTTGGATATACTTTCTCTGAGGGGATAA
ASHG19A3A039601	388.926	286.811	8.51341	8.25119	noncoding	ENST00000412485	GS1-600G8.5	Ensembl	1497	chrX	-	13284166	13321511		ACTAGTATTGTTAACCATTGCAAAGAAATACTGTTGCCCTCCATTAAAACCTGAACTGCC
ASHG19A3A000081	2724.26	2206.43	11.3254	11.1991	noncoding	ENST00000400430	RP11-350A18.1	Ensembl	702	chr13	-	41025130	41055143		TGGAATCTTCCTCCTCCTCACTTCTCTGCCTTAAGGGCTCTGCCTGCCACAATTCATGAG
ASHG19A3A010806	77.3794	75.5352	6.19397	6.31767	noncoding	ENST00000438401	RP5-845O24.8	Ensembl	378	chr1	-	12882548	12883022	ENST00000437631,ENST00000432559,ENST00000417907,	AAGATCAAAATTTCCAATCCGTATGTCTCGGGTGCCATCTGCTGATAGATCGGACCAGAT
ASHG19A3A038935	227.889	303.295	7.74741	8.33729	noncoding	ENST00000367276	C9orf44	Ensembl	738	chr9	+	94903579	94910588		GCCGCCAGGTGACCCAGCAGCCCGGCCGCCGAGATGCCCAACCCGCCCAGGCTCCGGGCG
ASHG19A3A012557	124.439	154.818	6.88036	7.35837	noncoding	uc002nzf.1	AK128099	UCSC_knowngene	3312	chr19	+	35896508	35907742		TTCACAGGCACATCCAACCTCCATCCTTACATTCCACAAGGATTTGAGTGTCTGTTATAG
ASHG19A3A008625	211.869	157.612	7.64633	7.38409	noncoding	ENST00000456771	RP11-540K16.2	Ensembl	532	chr1	-	181159606	181160285		TCAAGTCACCGTCCACCCTTCAGCTCTGAGCTAGAATCTCAGCAGACACATCTGGGCCAG
ASHG19A3A015258	185.229	181.613	7.45019	7.58876	noncoding	ENST00000440268	AC011995.2	Ensembl	472	chr2	+	2875862	2876529		GCTCCAGTTTCTTCGTTTGCAAAATGGGATCCTCAGAGACACCCACCTGGCCCTTTCACA
ASHG19A3A050469	56.4228	300.798	5.73309	8.32288	noncoding	ENST00000455487	RP11-54H7.2	Ensembl	698	chr13	+	109934320	109940081		TAAAAGGAAGCAACTCTGGAGAACAGAATGAGAAATCAGAAAGCAAGGCCCTGTCCTCTG
ASHG19A3A017526	2771.78	2856.93	11.3496	11.5637	noncoding	ENST00000432067	RP4-610C12.1	Ensembl	460	chr20	-	29565755	29596406		AATGGACTTATCGACCTCAAACCAATGGGACATATTCCTACATGGCCTTCTCCCCTGTTA
ASHG19A3A018682	97.1539	72.3611	6.53165	6.25613	noncoding	ENST00000452500	AP000472.3	Ensembl	530	chr21	-	23305634	23348000		GAATGATGCCCCAAATGTTGATATGAATTACATAGTGTGTCCTGCTGTGAGCATCAGAAG
ASHG19A3A039884	337.682	414.563	8.31079	8.78972	noncoding	ENST00000425150	RP11-348F1.3	Ensembl	451	chrX	-	51099795	51139314		TCCTAGAACCTCAGAGGCATGAAGCTAGAATATCTTCCCCTTCAAGGAGAATAAGCCAAG
ASHG19A3A016519	447.533	498.801	8.71471	9.06016	noncoding	ENST00000439050	AC009299.3	Ensembl	2333	chr2	+	162101249	162105561		GCATTTATTGGTACATAGTTAATGCTTATACACAGGCTTCAGTGTAACACCTATACACTA
ASHG19A3A055256	854.787	535.003	9.64982	9.15787	noncoding	uc004ebo.2	LOC554203	UCSC_knowngene	2212	chrX	+	73164158	73220326		ATTGTTTGTTTGAAATTGCATTGACGACTGGTACTGGCTCCTGTATCACCCAGCTCTGGA
ASHG19A3A009395	128.388	117.959	6.92579	6.96268	noncoding	HIT000395572		H-invDB	354	chr1	-	200443206	200443559		ATTAAGTAGGAGGTTCAGGGCTAAGCTAATAACTCGCCTGCCTTTCTGACTGATCACAGT
ASHG19A3A037109	283.593	230.093	8.06338	7.92928	noncoding	ENST00000435444	RP11-29B9.2	Ensembl	501	chr9	-	7960412	7961080		GAACTAAGAATGAGAGCCTTTCCTGCCAAGCCCATTCTGTGCCAGTCATCATAAAATACT
ASHG19A3A044505	200.687	180.273	7.5625	7.57782	noncoding	ENST00000428766	RP11-57H14.3	Ensembl	317	chr10	+	114648491	114665870		GGAAAGATCAGCTCTGCCATTTGAAACACCCAACTGCTACCTTCTCTCAGAAATCAAAAG
ASHG19A3A000387	574.546	525.285	9.06903	9.13273	noncoding	ENST00000467677	AC068610.3	Ensembl	685	chr7	+	114719072	114765997		ACTAACCATCCAGCACCACTTAAAGCCACACTCTCCTCTTTGGTCTTTCCTGGTACGCAG
ASHG19A3A044557	171.175	211.373	7.33573	7.80969	noncoding	ENST00000436430	RP11-245J24.1	Ensembl	556	chr10	+	120001163	120027222		ATACCTCCGTGTGCATAATGGTTGTACCTGCTCCAGGAAGGCGCTGGATCCTCCCAACTC
ASHG19A3A046504	80.3722	111.719	6.24966	6.88246	noncoding	ENST00000423408	RP4-794H19.1	Ensembl	1211	chr1	-	59348539	59362337		ACTGAGGCTTCAGAAGAGTTTGGGAGCTGCAATTCATCCACACACGCATTCATTTTCAAG
ASHG19A3A018102	71.8232	112.141	6.08643	6.88749	noncoding	uc002wrm.1	BC090059	UCSC_knowngene	1294	chr20	+	19780217	19790937		AAATTGAAGAAAGACACTTCCAGTTTTCAGAGGGAGATCCTCTGCCACAAGAGAACAGCC
ASHG19A3A050121	122.763	98.8447	6.8624	6.70006	noncoding	ENST00000437867	RP11-478K15.2	Ensembl	266	chr13	+	44717728	44813010		TACTCGCTTAGAGGGTGAAAAAAGTGAATTTGCCTACAGGGCCAATTTGGAAGCACCTCT
ASHG19A3A020257	270.191	312.957	7.99573	8.37977	noncoding	ENST00000420391	CTA-796E4.3	Ensembl	188	chr22	+	26557799	26560269		GCTCACTTTGTATTCTGTAAACTTTCAGTTGGAAAATAAACACACTGTCTCCCTGTCAAA
ASHG19A3A030413	108.458	113.164	6.68876	6.90169	noncoding	uc003pwa.2	BC037331	UCSC_knowngene	2746	chr6	-	114189182	114194512		CGACACATTATCAAAGGACTATCTTGGACCTTCTCATCCCAGCAAACATCCAATGGAGAA
ASHG19A3A042710	621.743	426.582	9.18326	8.83194	noncoding	ENST00000411791	FAM25E	Ensembl	322	chr10	-	46310875	46312772		GAATGCACCTGCTACCATGGCCCACCCTTCCCAAGTCTCAATAAAAAGCCATGAAATATG
ASHG19A3A016235	1741.12	1482.64	10.6841	10.6199	noncoding	NR_026821	FAM138B	RefSeq_NR	1130	chr2	+	114334958	114336428	NR_026823,NR_026819,NR_026818,ENST00000507796,ENST00000504074,	TGTGGTCTTGTCTATTCCCACTCCCTGCCTGACTGAACATTTTCTCCACCTCCTGATCAT
ASHG19A3A039324	5692.65	5016.31	12.3915	12.3742	noncoding	ENST00000419300	RP11-492E3.1	Ensembl	1959	chr9	+	132251378	132267360		AATGTAGTGTCTTTAGACCGTGCAATGTTGTGCTCCTGTTAGTCTGATATCAGGGGCTTG
ASHG19A3A044181	134.83	131.815	6.99174	7.12535	noncoding	NR_002724	MBL1P	RefSeq_NR	1424	chr10	+	81679933	81682875		TAAAATGCCATTGCCTCCAAAACAAAGCTGTTCGTGGACTCTCTGGGATCCCATATTTCC
ASHG19A3A032557	7002.23	7645.17	12.6968	12.9747	noncoding	ENST00000439839	AC004485.3	Ensembl	527	chr7	-	24236280	24295338		AAATCAATGTTAGTTCCTGACCGCTCCCCCTCTCTGTGTATTGGTCAATCACTGTCTGAT
ASHG19A3A031764	376.395	372.2	8.46537	8.633	noncoding	ENST00000452402	RP11-250B2.3	Ensembl	682	chr6	+	81153060	81175644		AAGCTTTCACTGGGAGATTATGAAGGGTAGATGCTTTGTGTCTCCATTGCCTCCTGTGAT
ASHG19A3A030851	133.838	131.922	6.98244	7.12633	noncoding	ENST00000433388	RP1-137D17.1	Ensembl	588	chr6	-	169770092	169788480		AAGCACTTTTGCATCTCTTTCCTGCCCAGAAGCGACCAGAGAGGCCAGGCATTGTCACCT
ASHG19A3A045288	249.239	307.72	7.87841	8.357	noncoding	NR_026878	MGC12982	RefSeq_NR	2527	chr1	-	47897807	47900313		GAAAAGTTATCCAGAGACTTTTAACCTCCGGACTCCACTCTTCGCTTATGTTTGCTTTTT
ASHG19A3A013363	100.356	68.412	6.57994	6.17588	noncoding	ENST00000423706	AC012506.1	Ensembl	525	chr2	-	23553534	23554915		ATCCTGGATCACTCTGAGAGGTCACTGGAAAAGAACGAGAACAGCTTTCCCCATTTCTTA
ASHG19A3A033488	2090.12	1574.75	10.9368	10.7032	noncoding	ENST00000467630	AC000123.3	Ensembl	461	chr7	-	126989886	126990347		AAATCACTGTATGAATAGTGAAAGCTGGACTGTAGCACCAATAATAAATGCTCTTCTGTC
ASHG19A3A018061	119.402	102.212	6.82059	6.75086	noncoding	ENST00000449841	RP5-1069C8.1	Ensembl	484	chr20	+	12916686	12917842		AATCTGCTCACCTGAAAGGCTCACTCCTGTTGTAATAAATGACACATAAGGTCACAATTC
ASHG19A3A013244	154.387	89.7199	7.18865	6.5579	noncoding	uc002qym.1	AK124409	UCSC_knowngene	2130	chr2	-	6869300	6910442		ATGCTCTCTGTTCCCTGTGAGAAGAAGGGGTTTCTTTTCTTCTGGGATGATTCATCCCTT
ASHG19A3A030574	1150.22	1284.6	10.0838	10.4142	noncoding	ENST00000447848	RP11-394G3.2	Ensembl	777	chr6	-	136128285	136129604		TCTATTCTCCCTACTCCCATATTCTTCCAGTGGGACAAAGTGCCCCAAAGTATAAGTCAG
ASHG19A3A038829	81.5331	69.5204	6.27144	6.19831	noncoding	ENST00000417801	RP11-394O9.1	Ensembl	446	chr9	+	82645493	82649470		TCCAGGAATGCGATGAAAAGATCTGTAAGAGAGCACAGCCCCTGTTGATTGACTTGTCTT
ASHG19A3A017525	326.075	406.401	8.26232	8.76164	noncoding	ENST00000454331	RP4-610C12.3	Ensembl	553	chr20	-	29521636	29522987	NR_026658,ENST00000451009,ENST00000421418,	TATTTATAACTCCCTCTATAACTCTCTGTTTGGAGACACTGTGGCTCTATTGACAGACTG
ASHG19A3A017155	997.405	1098.96	9.87787	10.187	noncoding	ENST00000455068	AC011286.1	Ensembl	561	chr2	+	237642024	237661449		AATTGGAATGTATTTTGAAGCCCCCCATACAGCCCCCTGTTGTCATTGACCCTAAATCTG
ASHG19A3A042284	71.4784	114.378	6.07983	6.91728	noncoding	ENST00000442712	RP11-439E19.7	Ensembl	522	chr1	+	246853348	246855123		TGACAACCACCAGCAGCTACAATCATGCCGAACCAAGAACCAGAGGATTCAGTAACTTTA
ASHG19A3A020014	184.124	475.628	7.44179	8.98975	noncoding	uc002zll.1	CR605662	UCSC_knowngene	1732	chr22	+	16373080	16377057		CCTGTTCCACATCTATGCATTCCCCATCTATCTAATGTATATTCAGACACAAATGTATAT
ASHG19A3A043356	123.661	146.271	6.87182	7.27484	noncoding	ENST00000437838	RP11-498J9.2	Ensembl	229	chr10	-	120763047	120763396		GCTGCCTGCAGCTGGAGGCCACAGGCCCCCCATGTTGAAGAAGTGTCACCTTCAAAGGGA
ASHG19A3A044092	511.875	469.734	8.90027	8.96899	noncoding	ENST00000441348	RP11-472G21.2	Ensembl	525	chr10	+	73638113	73638865		GGCTGTGCAGCCAAAATTTGCAATTCTTCCCCCAGCTTTTAAAATTGTAGTAAAATATAT
ASHG19A3A030150	176.903	172.469	7.38262	7.51383	noncoding	ENST00000422157	RP6-74O6.3	Ensembl	439	chr1	+	147496675	147498172		TTCCTCAGAAGAAGAGTTCCAAACAAAAGATCTACTACCCTGAGAAGCGGTGAAGTGCTC
ASHG19A3A050243	128.739	100.925	6.92879	6.73042	noncoding	ENST00000455894	RP11-521H3.1	Ensembl	324	chr13	+	61259332	61268662		ACAAAACACTTTCGACGAAGGTCCTGCTGCTTGTCTTCAGCTTGGTACCAATTAGAGCTT
ASHG19A3A044279	104.927	106.79	6.64153	6.81701	noncoding	ENST00000439157	RP11-94M14.2	Ensembl	784	chr10	+	92214454	92290873		AATGAAAAAGTATCACAGCTGAGACAAAGCTCCTCAGCCTCAGCATGTTTGTCAGTGTGC
ASHG19A3A007409	1259.67	2041.71	10.212	11.086	noncoding	NR_026762	C10orf75	RefSeq_NR	1003	chr10	+	102133332	102148110		ccaaggaacatcttgccaatttcaaatcggataggaGtgtcaggcctctgagtccaagct
ASHG19A3A032309	1069.98	962.511	9.97951	9.99423	noncoding	ENST00000446476	RP5-826L7.1	Ensembl	600	chr6	+	164007614	164009197		AGTATTAGGAATAAGGCCCCACCACCACCCCAACACACTTTTAAATAATAAGACGTTCAG
ASHG19A3A050863	227.339	209.963	7.74348	7.79925	noncoding	uc001ejn.1	BC070106	UCSC_knowngene	1888	chr1	-	143424332	143467651	NM_001033515,	GGATCCCAGCGGTGGTCGTGTAGCTGAGCAGGCCTGGGGCTTGGTTCTATGTCCCTGTGG
ASHG19A3A000302	94.224	97.173	6.48487	6.67347	noncoding	ENST00000447511	ANTXRL	Ensembl	506	chr10	+	47668556	47681735		TGTCAGCATCACCAGCACCACATGTACTGTCAAGGAGCCACCACCTGTGCAGAAGCCAGA
ASHG19A3A042360	75.5663	104.126	6.16031	6.77896	noncoding	ENST00000413993	RP11-482E14.1	Ensembl	832	chr10	-	3529085	3545030		TATTCCTGTGACTGCTGCACATTTGCCTTATCTCAGCAGTATGCCTGTGTCACTTTTTTG
ASHG19A3A009269	149.952	136.313	7.14743	7.17243	noncoding	ENST00000456235	AC087393.1	Ensembl	750	chr17	+	20978868	20993928		ACTGCTCAGCAATTTTCTTGGAGACCTCAGTGCTCATGTTATTCTTTCCTCTATCTTATG
ASHG19A3A049606	317.697	317.22	8.22418	8.39872	noncoding	ENST00000417989	RP11-24H2.2	Ensembl	577	chr13	-	53720673	53725943		AATGACATCCACAAACCTCTTCTGCTGTATACCTGGATGAAAGCAAGGCTAGCTGTGTGT
ASHG19A3A032355	168.231	95.2228	7.30897	6.64535	noncoding	ENST00000429305	RP11-302L19.1	Ensembl	429	chr6	+	170477740	170478251		CAGTCACTTCCGCTTGTACTAATTCTGGCCCAACCGTTCATTATATTTTTACAATTCTTA
ASHG19A3A053413	121.755	149.034	6.84945	7.30378	noncoding	ENST00000441085	RP11-98G7.1	Ensembl	523	chr1	-	156416203	156426258		AGATCACTTTGTGCTCCTGTGATCTGAAGGCTGCGTGAAGAAGATGAGGCTTGGAAAATA
ASHG19A3A017907	148.194	84.0025	7.12889	6.46647	noncoding	NR_003245	HAR1B	RefSeq_NR	896	chr20	-	61726844	61733671	ENST00000447910,	ATTCAGGGATGAGGTCCCCTGGGGCTAAATGAATGAACAGATTCTGAAAAGCAGAAGCTA
ASHG19A3A033808	193.607	126.526	7.51306	7.06812	noncoding	ENST00000426187	AC073133.2	Ensembl	432	chr7	-	156225216	156228527		GAAAATCTCCTTGCAGTACCGGCCTACAAATGTACCGTTAGGAAGCTGTTCTCTTCAAGA
ASHG19A3A050448	140.571	126.574	7.05173	7.0686	noncoding	ENST00000416924	RP11-484I6.6	Ensembl	361	chr13	+	103532285	103533517		CTGTCAGAATCCTAATCCCTTCTGCCTGGACTCGTTACCAGTGGTAGCGAGTGTGTATAG
ASHG19A3A033963	103.832	101.775	6.62545	6.74341	noncoding	ENST00000447999	AC060834.3	Ensembl	618	chr7	+	9776950	9809142		CTCTACTATCATCCTGTACTGGATAGGCCCCCACAAATAATCCTGTATTTTGGTAAACCG
ASHG19A3A013808	588.778	757.233	9.10604	9.65428	noncoding	NR_024444	LOC100133985	RefSeq_NR	661	chr2	-	70351168	70352448		TTTTCTCTACTTGGATCTGAGAACTCTGTCCCTCCAGCCCTGCGAGCGCTTTGCCAGGGT
ASHG19A3A009455	317.935	313.648	8.2255	8.38334	noncoding	uc002hrd.1	FLJ43826	UCSC_knowngene	3580	chr17	+	37186158	37209458	NM_020426,	TACAAGTAAAACTGACCAGAGCCCCAGGAATAAATGGTTTTCTTGGCTTCCTCCTTGCTC
ASHG19A3A042582	92.6612	120.96	6.46044	7.0013	noncoding	ENST00000440932	RP11-253D19.1	Ensembl	541	chr10	-	30842782	30843412		TTCAAAGGAGTGCATGAAAGATATCACAGCCTCACAAATGCAGAGAAAAGCCTCCCTTGG
ASHG19A3A031966	86.7966	81.876	6.3594	6.43074	noncoding	ENST00000456424	RP1-249H1.2	Ensembl	375	chr6	+	114113031	114158556		AATTGGACCACCATGCAGCCTGCTAATTCCTGTGATCTTTCTTCTGCTTTTGAAGAAATT
ASHG19A3A020070	97.2938	123.025	6.53361	7.02645	noncoding	NR_024159	DGCR9	RefSeq_NR	2434	chr22	+	19005346	19007760		ACATACTTTCCATAGGACCCAGTGCTTTCATCTCCGTGCAACTGACCAAGAGAAACCAAA
ASHG19A3A020453	178.623	203.946	7.39618	7.75757	noncoding	ENST00000450216	CTA-150C2.13	Ensembl	678	chr22	+	39317231	39320713		ATTTTTCCCTCATATTTGAACCCCACATGCACCAAGGGCTGTTTTATGCCTTGCACATGA
ASHG19A3A037679	241.374	353.513	7.8295	8.55671	noncoding	ENST00000449990	RP11-555F9.2	Ensembl	791	chr9	-	93225940	93345026	uc004aqt.1,	TTCATCTTGGCCCTGCTTTAAAATGATGCATCTACTGTCTTCATGCCTCAGCACAGCAGA
ASHG19A3A039322	107.208	88.8736	6.67313	6.54445	noncoding	ENST00000439014	RP11-65J3.2	Ensembl	800	chr9	+	132200494	132201397		CCTTATTCATCCACGTAACCTCAGCCTCTAGTGCAGCGTCCTATTTTTTGGCTTGTATTA
ASHG19A3A014127	302.066	328.481	8.15314	8.4499	noncoding	ENST00000449772	AC068535.3	Ensembl	493	chr2	-	105028684	105030466		TTGCGTATGCAAGATTCGCTAGCATGTAAACTCTGTCACTGTCTCCCAAGAACACAGAAA
ASHG19A3A020115	381.833	406.237	8.48808	8.76127	noncoding	uc002zsa.1	AK094309	UCSC_knowngene	2167	chr22	+	20378629	20381779	ENST00000449424,	TGTATTCTGGTATTCTTACTACTTGAGCTCAGCTCATCGCTGTCATCTTCCCCTAAACCG
ASHG19A3A014385	117.775	131.961	6.80282	7.12669	noncoding	ENST00000437330	AC103564.7	Ensembl	562	chr2	-	132587373	132589604		AAGCGCCCGCTTTCTCGGCCCAGGCCCGCAGCCAGGGCTGCTCCGCCCGCTGCGCCCCAG
ASHG19A3A038963	709.76	879.848	9.38062	9.86503	noncoding	uc004aul.1	DM004128	UCSC_knowngene	103	chr9	+	96941107	96941210		TAGTAGGTTGCATAGTTTTAGGGCAGGGATTTTGCCCACAAGGAGGTAACTATACGACCT
ASHG19A3A028163	1884.86	1006.72	10.7947	10.0611	noncoding	ENST00000399543	AC025171.1	Ensembl	2423	chr5	+	43042194	43045492		TCCAATTGCCTTCTGGTCTTACAGACGGGAGAATAAAGGAAAAATGGCATCGTTTCCACC
ASHG19A3A020346	3018.76	2912.96	11.4731	11.589	noncoding	ENST00000430449	CTA-342B11.1	Ensembl	473	chr22	+	32359343	32366387		ATGTGAGGATGTTTCTGCCACTCTGGACATTAGTTTTCTCCCCTAAGTGGCTCTATCTCT
ASHG19A3A020549	125.654	130.921	6.89355	7.11519	noncoding	ENST00000415702	CTA-397C4.2	Ensembl	630	chr22	+	44839206	44840668		ACCCTGGAGCCTGTCATGTTACTCCAAGGCTGACTAGTCCCAGTCCCCAGTGAGAAGCAA
ASHG19A3A019640	473.738	586.615	8.79337	9.28872	noncoding	ENST00000415655	RP1-231P7P.1	Ensembl	577	chr22	-	27959799	27969534		GGGGCCCGGACACATTATTTTCTCCAAGGAATTTCTTCTTTTCATTATTTCCCTCCAAAG
ASHG19A3A044211	159.642	66.558	7.2381	6.13523	noncoding	uc001kdf.1	AK056561	UCSC_knowngene	2685	chr10	+	86039735	86054415		ATTTCCAAAATGTCAACAACACTTTGGACTATCAACCTGTCTAAAGAGTATTTGAAGCAG
ASHG19A3A042364	158.451	422.209	7.22834	8.81495	noncoding	uc001ihe.3	LOC100216001	UCSC_knowngene	2553	chr10	-	4621443	4720262		TGACACAGACTTCCTTAGATGTGTTGTCTTCCTGTCACTGGTGCATTCCTTATCAATGTG
ASHG19A3A046831	161.837	106.687	7.25661	6.81564	noncoding	uc002khh.2	LOC388312	UCSC_knowngene	4812	chr1	-	661139	679736	NR_028327,NR_028326,NR_028324,NR_028322,NR_024497,NR_024368,ENST00000494149,	AAACTTCGGGGTCTACAAACGCAGGCGGGAGCTGAGCCAAAAGAGCTTGTTTGCTGGGAG
ASHG19A3A044574	404.689	314.016	8.56953	8.38547	noncoding	ENST00000411599	RP11-254K3.1	Ensembl	479	chr10	+	121940741	121968507		TTCACCCCCTGCCAGGCCAGTAGAGGAGCTGAAGAGTCTTCGCCATGGTTTGAGAAAAAG
ASHG19A3A018410	149.523	116.553	7.14315	6.94521	noncoding	uc002xts.1	BX648826	UCSC_knowngene	4087	chr20	+	46585042	46589679		CCAGCTGCAGTTCCCTGACAGTCCAGTGAATTCAGCCAAAGGAAATGGCCCCACATGGAG
ASHG19A3A020033	104.392	96.8886	6.63256	6.66961	noncoding	ENST00000442403	AC007064.24	Ensembl	500	chr22	+	17350367	17352016		CATTTCTCACTGGATCAGTCAACAAGATTTGAGTACTTTCTGTGTGCTCTGCATCATTCT
ASHG19A3A042013	85.3164	106.177	6.3339	6.80833	noncoding	ENST00000423963	RP11-443B7.2	Ensembl	423	chr1	+	235092977	235095736		GACGTCCTGGAGAAACCTCTGGAAAAACAGAAATTTTATGACCCACAATTAAAATGATTT
ASHG19A3A040337	125.643	139.357	6.89344	7.20462	noncoding	ENST00000422226	GS1-421I3.4	Ensembl	279	chrX	-	119251551	119253610		TGTGACAGCTTGATTTCTTCCACATCTCAGATTTCCACAGTGTACCCCGGTGTTTTCTCA
ASHG19A3A038911	182.413	165.997	7.42774	7.45811	noncoding	ENST00000444374	RP11-316P17.2	Ensembl	822	chr9	+	92316565	92334585		GAGACAGAATTGGCCCCATTTTCTGCTAATTTCCATTCTCTGATTGTGCTGCCTGCTACA
ASHG19A3A040063	171.558	133.462	7.339	7.14187	noncoding	ENST00000445437	RP1-172N19.1	Ensembl	453	chrX	-	72001688	72002484		AACGAAGTCCTGTCGGTCCCTACCGGCACATCACACACTCCTGGAAGCATGATCTTCACT
ASHG19A3A037217	296.078	278.061	8.12478	8.20607	noncoding	NR_026679	NCRNA00032	RefSeq_NR	2913	chr9	-	27245683	27282791		ACTTCAGTTGTGGACATATCGGTTATGTTTCCTCATCAGCTTGGCTTGCCTCCCAAAAGA
ASHG19A3A032148	382.28	323.803	8.48935	8.42895	noncoding	ENST00000417650	RP11-439L18.1	Ensembl	554	chr6	+	143271347	143277783		ATGTCTAGTGACAGGCCAGAGATCAAAACCCAACACCCTCATTTACCTGACAGTGATTTG
ASHG19A3A048508	177.509	143.997	7.3877	7.25079	noncoding	ENST00000435559	RP11-86H7.7	Ensembl	2272	chr1	-	95086706	95089740		ATTTTCATAAGGAAAGTTCTGTTAGGAGAGCTGCCTGAAACAACACCTCTGCCTGTGCTC
ASHG19A3A038967	82.7027	93.3057	6.29145	6.61645	noncoding	ENST00000417264	RP11-533K9.2	Ensembl	155	chr9	+	97247981	97250077		CACCCTGCCCGTTGTAGATGAGGAGTCCGTTGAAGATGAGGAGTCCATTGAAGATGAGGA
ASHG19A3A049902	237.224	204.579	7.805	7.76192	noncoding	ENST00000438640	RP11-76K19.5	Ensembl	422	chr13	+	20161257	20162490		CTGTCATGTCGGGCCGTTTCCTTGCCTTCTTGCACACAGCACTATCTGAAATAATCTCCT
ASHG19A3A031013	1014.92	1581.97	9.90313	10.7124	noncoding	ENST00000447179	RP11-146I2.2	Ensembl	177	chr6	+	14841454	14871959		ATCCTCCCCACTACAAGCCATTTTCTAATGTGTTTGATGTGTATCCTTCTATTTCGTTAA
ASHG19A3A042641	145.537	95.9771	7.10119	6.65678	noncoding	ENST00000453837	RP11-84A19.2	Ensembl	2257	chr1	-	32307619	32321169		TTATGAAGTTCGCATAACTGAGACATACCTACCGCACCTCTGTATCTGCCAACGCATACT
ASHG19A3A016227	955.889	1232.71	9.81179	10.3562	noncoding	ENST00000422178	AC016745.3	Ensembl	508	chr2	+	114182071	114182901	ENST00000425587,	CGGCAATGGATTAATAACAAGAAATTAATGGTGAAGTGGTGACGAAAATTCTACATTGCT
ASHG19A3A044385	2370.11	3170.21	11.1219	11.7034	noncoding	ENST00000454935	C10orf75	Ensembl	2551	chr10	+	102133371	102143125		GTCAAACAGAAGGTAAACAGTCTTACGAATGTAATTCCTTAGGAAGACTTGTACAAACTT
ASHG19A3A000111	19019.8	15537.9	14.1434	13.9946	noncoding	ENST00000415629	RP4-726F1.1	Ensembl	342	chr1	+	79789453	79790534		AAATTAGCTGGGTGTGGTGGTTCAGGCTCTGAAAATGATTGATTTTTTTCCTATATTTCA
ASHG19A3A055154	210.673	237.404	7.63696	7.97203	noncoding	uc002qgt.1	BC131616	UCSC_knowngene	2014	chr19	+	55219699	55224842	ENST00000413439,	CAAAACAAGACAGACTCCAAGACTGCCTCACACCCCCAGGATTACACAGTGGAGAATCTC
ASHG19A3A013358	124.282	184.462	6.87898	7.61116	noncoding	ENST00000412424	AC009411.1	Ensembl	548	chr2	-	21861302	21872435		AGCATATCCTGATCGCCACCTCCAGACCCTTCTGATAGATTCATTACCTGAATCTATTTG
ASHG19A3A044683	76.3644	102.082	6.17505	6.74863	noncoding	ENST00000300167	RP13-49I15.3	Ensembl	258	chr10	+	135060391	135061389		CTGGATCCACCGCCACCCGCTTGTATAAAAAGTGGGCCCCACACGGTGCAGCTTCGTAGT
ASHG19A3A000198	104.917	101.057	6.64127	6.73222	noncoding	ENST00000430123	RP11-354K1.1	Ensembl	357	chr1	+	211813149	211827518		GCTGGTCCTTGGGGTTTCTTGCAAGGCTGATAGCGGGGGAACCTCTCTCACAGGGCTGCT
ASHG19A3A040418	975.666	1166.42	9.84147	10.277	noncoding	ENST00000450784	RP11-452F19.3	Ensembl	543	chr1	+	222988363	223010726		TTAAGCTAGCCCATGACTACACAAGTGCAACTGTATTTCCCAGGTAGATGCCGGTAGATT
ASHG19A3A042759	88.2552	97.6626	6.38615	6.68112	noncoding	ENST00000440750	RP11-534L6.2	Ensembl	335	chr10	-	49872243	49880469		AGATGCTTTCTGCTCATGCACCTCAGTTTGGCCCAGTGAACACCTGCACCACCCAAGTGC
ASHG19A3A038962	186.662	118.942	7.46095	6.97609	noncoding	BC064349		RNAdb	1448	chr9	+	96938739	96940172		AGCATAACGTTGCCACCTTCAGTTGGAAACGTATCCTTATCTAATAATTAAGCCCTGGAG
ASHG19A3A007437	2257.95	2411.68	11.0465	11.3222	noncoding	NR_026903	AMZ2P1	RefSeq_NR	3442	chr17	-	62962667	62971703		CGCAGTATTTATATACGGTCCATTGGATCTCTATGAAGCACCAGAATTATCAGTGAAGAA
ASHG19A3A030624	405.473	964.372	8.57159	9.99917	noncoding	ENST00000445585	RP5-899B16.2	Ensembl	786	chr6	-	140177240	140198528		CACATACACACACTAGAGAACAAGAAGGAATAGTAAACAGTTCCCTCCACTGCTAGAGGG
ASHG19A3A017764	206.343	232.433	7.60455	7.94468	noncoding	ENST00000428999	RP11-347D21.3	Ensembl	429	chr20	-	46609231	46617488		GACTTCCTAGAGCTACAGAGTAAGCCAAATTGGAGTTGCCTTTTCTGGACGTCTTGTTAA
ASHG19A3A037720	119.426	107.357	6.82106	6.82509	noncoding	ENST00000443716	RP11-165J3.5	Ensembl	641	chr9	-	96192623	96193581		TCCACAGAGTATGCCAGATCCTTTTTGGCATCTTTCCCCAAGTCTAAATTTCTTTAGTGT
ASHG19A3A037238	67.8519	84.4526	6.00461	6.47542	noncoding	ENST00000413291	RP11-555J4.3	Ensembl	839	chr9	-	32643100	32645024		TATCAGAATTCTCCAGCCACTCCTGGATACCATTGCCAACAAGCTGGAAAGAACTGTGTA
ASHG19A3A011836	379.177	274.581	8.4781	8.18635	noncoding	ENST00000447908	RP4-704D23.1	Ensembl	579	chr1	-	14675449	14677518		TTGAAATCCCCTGCCTTAATCTCTCTTCGAAGACTTTTCTGCATTCATCTGAGTCCTCAT
ASHG19A3A050495	56.4107	65.8781	5.73255	6.12212	noncoding	ENST00000421423	RP11-450H6.1	Ensembl	545	chr13	+	112761432	112762329		TAAAGCAAAACAGTTAAAACATCAGGCCACGCTCCTCAAACTGCAGGATTGCAAGCAGCT
ASHG19A3A014197	422.75	398.486	8.62978	8.7302	noncoding	ENST00000414159	AC114776.3	Ensembl	4394	chr2	-	111467151	111474172		ATTTTTATTCTTCAGCTCTTTTGTTTTGGCTGGGGCTACCTGAGTCCTCCTTCCAGTTGT
ASHG19A3A049706	421.179	457.927	8.62228	8.93373	noncoding	uc001vlm.1	AF339814	UCSC_knowngene	1670	chr13	-	88096246	88323218		AATTGACCTTGCCAAAAGATGCCTCCCTAAATCCACAAGAATCTCCTTGTTTGAACACAG
ASHG19A3A049261	275.804	277.013	8.02455	8.20053	noncoding	ENST00000423023	RP11-523H24.3	Ensembl	376	chr13	-	20248763	20250024		TTGTTTTGCTAATCATCCTCCTTGAGCTCCACTGTTTTCATTCTGGGCATCCAATCCAGC
ASHG19A3A017499	255.355	227.031	7.91561	7.90854	noncoding	ENST00000438287	RP4-738P15.1	Ensembl	468	chr20	-	25123875	25129894		ACAGAAAACTCCACAGGCCTGGGCTCGGCTCATCGCACAGCCTCCATCTCTGGATGCCCT
ASHG19A3A037504	151.218	149.284	7.15871	7.30756	noncoding	ENST00000417843	RP11-764K9.1	Ensembl	2818	chr9	-	68397877	68401759	uc004aec.2,	ATGTTCCAACACACCATCTAAGCATGAAGCAGGAGACACCCATAATTGAGTTTGCTGCCA
ASHG19A3A038922	263.023	216.682	7.95659	7.8446	noncoding	ENST00000439438	RP11-305L7.6	Ensembl	454	chr9	+	93881343	93945044		AATACACCCAGCCCACACCCTGACTTTACAACCTTTAATTAATTAGAGGAAAGAAAGAGA
ASHG19A3A029464	515.166	545.317	8.91221	9.18718	noncoding	ENST00000447250	RP4-625H18.2	Ensembl	1016	chr6	-	19803601	19804877		CTGTTTAAGAGAAGAATGTCTGAGTAGCTGTTGATTATCTCCCATAATCACAAAACAACT
ASHG19A3A032616	1454.22	1619.66	10.4211	10.7485	noncoding	ENST00000442865	AC007255.7	Ensembl	590	chr7	-	29638410	29724871		AGAAAATCAGCAGAGCTAGGCAATAAGTCAATCTAAAGTCTACATGCCCCTCCCTCTTCC
ASHG19A3A042885	803.669	693.39	9.56413	9.52689	noncoding	ENST00000439904	RP11-9E13.2	Ensembl	1780	chr10	-	70237754	70240521		CATCTATTCTTTGAAACCCAGACACATTCTAGTATTGGGCACTAGAAACTGGTGATAAAT
ASHG19A3A055249	134.202	136.473	6.98564	7.17387	noncoding	uc004arq.1	BC128384	UCSC_knowngene	1184	chr9	+	94919968	94921538		TTGATGGTTTGAAGAGCCCTAATCAGTGGTGGCTGTAGTCGGCTGGCTGAGGTCTCCCCA
ASHG19A3A030635	103.899	73.0652	6.62609	6.26916	noncoding	uc003qje.1	AK057490	UCSC_knowngene	1900	chr6	-	143287560	143358719		TGTACTTCAGCAGGAGCAACCAGATGAATTGGCTTCTCTATATCCCCGTATTAGCCACAA
ASHG19A3A018529	184.229	169.908	7.44288	7.49253	noncoding	ENST00000448791	RP1-50O24.6	Ensembl	306	chr1	+	27202623	27204736		CAGTTGCAAGAGCAAAGAAAAAACTTCCAAGCCCTCTTGATTTTTGCCACACTCTCATAG
ASHG19A3A017390	274.669	228.874	8.01874	7.92021	noncoding	ENST00000422574	RP5-1195D24.1	Ensembl	833	chr20	-	16838606	16844793		ATGACAACCATATTTGCAAGCCAGTCCCCACACTACCAATGTTCTTTCTACAAGAAGTAG
ASHG19A3A017473	97.5821	128.319	6.53799	7.08889	noncoding	ENST00000442440	RP3-322G13.5	Ensembl	514	chr20	-	23337230	23338642		TGCAACAGACCACATTCAGAAGCTTGATTTCTTGTTGTTCTGGGAATATCTGGATCAGAG
ASHG19A3A043501	182.216	129.588	7.42527	7.10197	noncoding	ENST00000435531	RP11-363N22.2	Ensembl	407	chr10	+	978965	988683		TATAGCAGCATACTCTACCTACCCCTGATCAGTTTATGGAAGAAAAGGAAACCAAACAAA
ASHG19A3A033967	128.524	105.191	6.92695	6.79399	noncoding	ENST00000422697	AC004535.2	Ensembl	449	chr7	+	10742302	10747033		TCACCTGCATGACATTTCTTCACTTGAGATGCTGTTTGCCCTTTAAATGGCATCTTAGCA
ASHG19A3A041973	332.385	390.653	8.28896	8.70212	noncoding	ENST00000429269	NCRNA00184	Ensembl	2270	chr1	+	234765056	234770526		ATCTCCCAAGGTTCTTTCTTTGTAACAGAACCCTAGTTTTTGGCTGGACTCATTTCCCCA
ASHG19A3A048071	111.416	96.8924	6.72587	6.66969	noncoding	uc001dnu.1	AK022898	UCSC_knowngene	2786	chr1	-	91295103	91317175		CAGCGAAGCTAGATTGTATAATTTATTAGTTTTCTCCACCTGGTAACACATCCTTAAGAA
ASHG19A3A037286	71.8968	74.6135	6.08824	6.30002	noncoding	ENST00000421828	RP11-195F19.5	Ensembl	835	chr9	-	34664779	34665976		CCCCCAAAAACCCATACTGTGAGTCGCCTATATGAAGAGAACTAAATAATCCTGCCTGTT
ASHG19A3A043823	322.593	225.629	8.2469	7.89902	noncoding	ENST00000423162	RP11-508N22.8	Ensembl	790	chr10	+	38464595	38501285	NR_024524,	AGTTGTGTCTCTCAGTGCTTGTTGGGTTCACACCTATTAAATAAGCTGGCTGGTCTTCAC
ASHG19A3A040049	1130.15	1113.93	10.0567	10.2084	noncoding	ENST00000439926	RP11-402P6.11	Ensembl	220	chrX	-	70980624	70981509		TTTTTCTCTTCCGCTGCATTTGCCCCCTTCCCAACGCAGTTCAAAGCAGTGTGAAATAAA
ASHG19A3A008213	289.532	234.599	8.09424	7.95654	noncoding	ENST00000412357	RP5-1114G22.2	Ensembl	775	chr1	-	175172363	175173985		GCAGTGTCCCCTGTGTTCCTGACCTCCTGAGGAGCTGCTGGATGGCTTAGCCCCTTGACA
ASHG19A3A042720	185.954	104.505	7.45632	6.7846	noncoding	ENST00000437899	RP11-38L15.2	Ensembl	369	chr10	-	46937462	46951699		GACGAGTGCTCTTATCCATCCACAGTTCTTATCACAGTTACTTATGCATATATTCATTTT
ASHG19A3A055212	288.429	391.682	8.08743	8.70566	noncoding	uc003mud.2	MGC39372	UCSC_knowngene	1251	chr6	-	2854891	2876744		GTGCTGGTGTCCGTGGCGTGCCTGGGTGGAAAATGAGCTTATATATGAAGAAGTCAGCGA
ASHG19A3A000205	1529.1	1505.73	10.4914	10.637	noncoding	ENST00000431300	RP11-182L21.2	Ensembl	886	chr10	+	81586458	81598237	uc001ker.1,	AACAGCCCCCTTCTCAGTTTTCCTGCTGCTCCTATCAGTGACAAATCAGTGTATTAGAAC
ASHG19A3A000153	95.7944	127.804	6.50952	7.08253	noncoding	ENST00000422473	AP000688.29	Ensembl	2336	chr21	+	37477178	37481988		GTGACAAGACCTACTGCTGGACAGAGTGCTGCCTTTGGACTTTCCAGTGCCTCAGCATCA
ASHG19A3A017320	293.823	586.644	8.11339	9.28913	noncoding	uc010gbl.1	BC048109	UCSC_knowngene	1564	chr20	-	5412655	5426394		TTAACATTCAGAAGCCTTCATCTCCCATCTGCAAAATGGGCATGTCCAACTCAGAAGCTG
ASHG19A3A040891	131.616	109.979	6.95977	6.8594	noncoding	uc004dgj.1	AK127697	UCSC_knowngene	2924	chrX	+	45364632	45386484		CATTTTAGCTTGCTTGTTGCTGGGGAAAAGACTTGCTGCTTTGTGTTTCATTTGATGAAG
ASHG19A3A050134	72.4026	118.505	6.09687	6.97024	noncoding	ENST00000412946	RP11-290D2.4	Ensembl	225	chr13	+	45918513	45919045		GAAAGTAACTTGAGGCAACTGCAGGAGGGCTGCATGGCGGGAAAGAAATTGCTGAAAACA
ASHG19A3A031462	89.2769	75.21	6.40395	6.31115	noncoding	ENST00000434901	RP1-153P14.4	Ensembl	514	chr6	+	37514327	37515490		TGGATTCTTATCTGGAAGACACCCTGCGTCTTAGAACCTGCACCACAAGTTTTTGTTGTT
ASHG19A3A030992	270.448	242.721	7.99699	8.00518	noncoding	ENST00000412132	RP3-413H6.2	Ensembl	554	chr6	+	11810834	11811481		ATGCAAATATTTGTCCTGTTCTGAGACATCCTCCTGGGTCCCAGCTTCTTCTCTTGAAGA
ASHG19A3A042805	1542.21	1267.6	10.5031	10.3967	noncoding	uc001jjs.2	BC015429	UCSC_knowngene	971	chr10	-	54210637	54215032		CCACAACGGCAACCAGTAAAATGACTATTTTTACTGTCTTATCTATTAATGAAGAGGAGA
ASHG19A3A031136	222.246	223.959	7.71216	7.8893	noncoding	ENST00000424968	RP11-373D17.1	Ensembl	507	chr6	+	26988231	26991703		TTACCAACAAAATCCGTTGCGCCGCAGTGAGTTAGCTACCTTCTATCTCCACTTTGTTCT
ASHG19A3A014134	1547.92	1714.03	10.5087	10.8321	noncoding	ENST00000447876	AC018730.1	Ensembl	607	chr2	-	105424030	105469641		AGCGGAGCCGTGCGATGTATTTGAAAAGCAATCAGTCCGACCTTCCCCCATAGATTCATC
ASHG19A3A047087	1619.41	1645.54	10.5744	10.7734	noncoding	ENST00000423187	RP11-99H8.1	Ensembl	432	chr1	-	71181615	71185972		GGCTCTTCCTCCTGCTCCTGTCACCACAACAACTAGTGTGTGGAGCACAACTAGCCTGAC
ASHG19A3A011325	68.025	79.2199	6.00924	6.38503	noncoding	ENST00000446169	RP11-410C4.4	Ensembl	390	chr1	-	220658445	220660385		TATTCGAGTCTGCTGCCTCAGATATATGGGCTATCATTATCCTAAGTGCCTGCACACCTA
ASHG19A3A000066	155.376	121.077	7.19702	7.00248	noncoding	ENST00000366195	RP11-101E5.1	Ensembl	419	chr9	+	65467782	65469026	ENST00000445963,ENST00000433614,	ATTGAACAAGGCAATTCCCAATCTCTTGAGCCCTGGCTGTGTTCACTGAATGGATCTAGT
ASHG19A3A020593	247.327	264.918	7.86523	8.13555	noncoding	ENST00000449941	RP13-455A7.1	Ensembl	219	chr22	+	48256419	48257811		GAATCTGCCACCACAACTTCCAGCCTCCAGGGGACGGACACCCACTTTCAAGGATTTCTT
ASHG19A3A044177	3150.15	3273.74	11.5386	11.7507	noncoding	NR_029407	LOC642361	RefSeq_NR	1712	chr10	+	81585657	81587355	AK025716,	AAGGCGAGCCATGTTCTAGAGCAATGTCTTTCTTGTATTAAAATACAGCCCCATGCTCAC
ASHG19A3A016206	134.534	127.511	6.98872	7.07976	noncoding	ENST00000436885	AC012442.6	Ensembl	529	chr2	+	113348372	113349516		TCTATGCCATGCAACTAAAAGAAGTGTGATTAAAACAGACAAAATGGAGATCCAGACTAC
ASHG19A3A016787	1487.82	1274.51	10.452	10.4034	noncoding	ENST00000452795	RP4-798A10.4	Ensembl	342	chr1	+	16847188	16848303		GCTCCCATTGTTTGCTTGTTCAATTGTCTGTCCGTTAAATAAATAAAACCCTTTTCCTAT
ASHG19A3A038602	115.003	80.5424	6.76818	6.40813	noncoding	uc004abv.1	BC121813	UCSC_knowngene	1106	chr9	+	41516045	41522322	uc004adv.2,NR_026803,NR_026802,NR_026801,ENST00000377629,ENST00000377512,	CTGTCGTTACTGCTGCACTTGGCTGTTTTTCTTTGGATAATTATTGCAATCAATTTTAGT
ASHG19A3A029807	21946	7941.58	14.3405	13.0288	noncoding	uc003ojj.2	CR624291	UCSC_knowngene	2513	chr6	-	34247456	34249969	AK026168,	TTTGAGCTGTGTGGGAGGGAAGGGCATTGAAATTGTAGGTTGTAATCTTGTGCCAACCAA
ASHG19A3A000221	295.565	333.458	8.12188	8.47068	noncoding	ENST00000434384	AC004383.5	Ensembl	724	chrX	+	133684002	133693953		GGTGTCCTTTGAGCTGCCGGGACGGCGCAAGAAACCTGTTTATGCACCCTCCTGCAATCC
ASHG19A3A020732	375.377	521.915	8.46186	9.12293	noncoding	uc010nxt.1	AK125248	UCSC_knowngene	2373	chr1	-	89294	237877	ENST00000424587,	TCCTCCAGGAAGCAGCAGGTTAACTGATTGGCAGAGACAGAGGGACTGAGGGACTGTCTC
ASHG19A3A042573	115.687	105.492	6.77709	6.79772	noncoding	ENST00000411802	RP11-305E6.1	Ensembl	514	chr10	-	30569014	30569839		CACCAGGAATACACCATTTAAACTCTTTTCTGCAGCCTCCTCAGTTTTATGTAAAAATAA
ASHG19A3A042723	273.344	240.639	8.01159	7.99216	noncoding	ENST00000422732	RP11-314P12.2	Ensembl	2444	chr10	-	47096453	47099716	uc001jef.2,	CCCCATATTCTTCATCTTGTTCCCTGGGATCTTTCTCCCTAATAAAGGAAAAGCTCATAG
ASHG19A3A012641	162.073	80.1022	7.2585	6.40044	noncoding	ENST00000442382	RP4-781K5.6	Ensembl	3564	chr1	-	234805268	234831900		GGTCTGACACCCCATGACCTTTTTTGAGATTTGAGGTTATGCCATGTATTTGAGAATAAA
ASHG19A3A049311	60.005	68.8664	5.82464	6.18588	noncoding	uc001upb.1	AK127292	UCSC_knowngene	4914	chr13	-	24481604	24523454		TATTATTAAATCCAGAAAGTCTGGGGTTCCATTTTTAGCACAAGGCAGGCAGCCCACGTG
ASHG19A3A039839	815.052	979.99	9.58361	10.02	noncoding	ENST00000453810	RP11-1148L6.5	Ensembl	450	chrX	-	48438161	48439545		TAAGAATAATGGCATGAACTGCTTTTAACAATTTAGAAAAGACCCATTCCCCCCGCCCCC
ASHG19A3A015651	584.6	541.364	9.09517	9.17815	noncoding	ENST00000418451	AC010967.3	Ensembl	333	chr2	+	53091372	53093769		AGAGACTCTCTGTATAGCTCTGCCCTCCTGAATTGCATGTCCAAATTGCATTGGAAAAAA
ASHG19A3A029676	122.716	100.759	6.86141	6.72812	noncoding	ENST00000442852	XXbac-BPG27H4.8	Ensembl	799	chr6	-	30807302	30815936		AGAATTTCCTTGTAGACACTTTTCAGGCCTTTGTTTGCTGGAGACTGGAGTTCCCTGAGA
ASHG19A3A030869	2041.28	2226.04	10.9052	11.211	noncoding	ENST00000441203	RP3-416J7.2	Ensembl	844	chr6	+	224949	226400		TTGAAAAATCTTCCCCACATTTATTATGCAAAAGCAACCGACGGAGGAGCGCCTGCTGAT
ASHG19A3A019641	115.951	129.419	6.78042	7.10001	noncoding	ENST00000440255	RP1-213J1P__B.1	Ensembl	819	chr22	-	28072555	28110959		ATTTCTCCTTTCCAAGCATCTCTCATGGAAGGCATCTTGGATGAAAAGACCTTTGGCAGC
ASHG19A3A040294	187.515	192.472	7.46627	7.67139	noncoding	ENST00000441160	RP11-400N13.2	Ensembl	1148	chr1	+	222139751	222158306		GGAAGAACCTGAGAGATAATCCATTTTATGAAATTTTCCCTACCCTGAAATGGGAGAATG
ASHG19A3A014074	4840.43	5427.54	12.1668	12.487	noncoding	ENST00000422600	AC159540.3	Ensembl	555	chr2	-	98069547	98071970		TTCATGTTCCACCTTCCCCTCTTCCCCGCTATTCCACAGGGTCTGGAGGAGAAGAGCAGA
ASHG19A3A039555	116.429	99.3606	6.78663	6.70862	noncoding	ENST00000422914	RP11-733O18.1	Ensembl	860	chrX	-	5571461	5644346		CTATGGAAAAAGCAACCTGGAGAAGAATTTTAGCCTCCCAAGCATCACCATAGTTGTCCT
ASHG19A3A039529	326.019	277.394	8.2619	8.20316	noncoding	ENST00000434938	NCRNA00106	Ensembl	357	chrX	-	1515319	1517852		TGCCCGCCACAGGTGCTCTCTGCTCCATCTCAGGTGACCACTGGCCATCTCGGAAGAAAC
ASHG19A3A040866	121.705	69.3194	6.84878	6.19499	noncoding	ENST00000452501	RP5-1172N10.2	Ensembl	835	chrX	+	41134991	41136031		TTTTGCACACTAATTAATAAACTACTGCAACGGAAAAAGAGAAAGCAGGCAGAATGCAAA
ASHG19A3A031016	1058.76	948.59	9.96622	9.97239	noncoding	ENST00000451285	RP11-401E14.2	Ensembl	845	chr6	+	15995174	16000028		TTAATTGGTTCAGTTTTCTTCCATTTCTCCTGAGCTCACCCTGACCCTATGCACTGCTGA
ASHG19A3A039535	110.096	109.162	6.70847	6.84878	noncoding	ENST00000445785	NCRNA00102	Ensembl	1340	chrX	-	2531028	2533388		GAGAAAGAATGTCATTTGTAAATCAACTGTGCTGCCTGGACCCAGTTGGGACTCTGAATC
ASHG19A3A020068	94.7378	80.7566	6.49371	6.41217	noncoding	ENST00000421572	DGCR5	Ensembl	568	chr22	+	18958095	18978396		ACTTCAGCAATGTGGCACGCAACGTGCAGTGGACGTACCTGCAGCCCTTTGTCATCGTCA
ASHG19A3A038107	126.569	84.2701	6.90438	6.47163	noncoding	ENST00000436510	RP11-65J3.3	Ensembl	1846	chr9	-	132192930	132209569		ATAACTGGAAACAGTGACCAATCTGCTGCCGTTCACCATCTTGGTTGCAAATATCACTCC
ASHG19A3A039749	250.627	367.9	7.88727	8.61939	noncoding	ENST00000431646	RP11-157D23.1	Ensembl	880	chrX	-	39226538	39251028		AAAGATCTTCAAACCTGGAAGGCTTGCTTCAAACCCCAGCTCTACTCCAACTACAGGATT
ASHG19A3A029392	99.4064	106.518	6.56579	6.81298	noncoding	ENST00000431369	RP11-354I10.1	Ensembl	661	chr6	-	9124453	9162010		GTCACTTAAAATATGATCCTTGGATAAACATCACATGCTGCTGGCCTTCTTACAAAATGA
ASHG19A3A000140	77.9406	77.3551	6.20458	6.35362	noncoding	ENST00000420169	RP11-49G10.8	Ensembl	570	chr20	+	31786014	31792975		TGGAGTTTCTTCCCAGCTCCTTAATGTGGGGCATTCTTTACAGATTTGACTCAAGGACTC
ASHG19A3A033834	135.442	104.349	6.99818	6.78215	noncoding	ENST00000484550	AC093627.10	Ensembl	5008	chr7	+	149596	155465		AATGCAAGAGGCTGATGACTCCAGATCCCTTATATAAGCCAATAAAAAGTAGTTTCATTT
ASHG19A3A051792	774.752	1040.75	9.50971	10.1059	noncoding	uc001yjz.1	AK094562	UCSC_knowngene	2638	chr14	+	101536247	101539271		AGGATTCAGAGAACCCCCAAATGTCAGGGCTGCTCCCTTCTTGTCCTGCCTCTCTGCTCA
ASHG19A3A009850	1427.56	1395.58	10.3908	10.5324	noncoding	ENST00000435469	AC005332.1	Ensembl	707	chr17	+	66097707	66111659		CACTGTAGCTCTCTACTGAAATGTTTTAAGGATCATTGTAATTCTGCTTTCCCTAATCTT
ASHG19A3A013817	491.872	419.641	8.8443	8.80574	noncoding	AK124090		misc_RNA	1801	chr2	-	70629126	70630930		TATCTCTACTTCTACTTCTGTGGCACAGAAGGGCTCCCCAGCTCCTATTCCCTGAATCCT
ASHG19A3A038146	158.479	119.669	7.22853	6.98531	noncoding	uc001gyh.2	LOC641515	UCSC_knowngene	2796	chr1	+	202789393	202796339		TTTTCTGTCTCCTGCCTTTTCCAGAAGTCTGTTGAACTCAAAGGGCTGAATGACAGCAGT
ASHG19A3A000095	65.1503	87.0557	5.94847	6.51605	noncoding	ENST00000412855	RP11-396C23.2	Ensembl	407	chr1	+	226274581	226277993	uc001hpx.2,	GCACGTGCCCAATCCCGTGGCGGGGGCTGGAACACAAACGGGGTGGTGTTCCAGCTGCAA
ASHG19A3A042434	1792.79	1682.28	10.7228	10.802	noncoding	NR_015413	LOC254312	RefSeq_NR	1127	chr10	-	10976903	10994126	ENST00000428520,	CCCACCCTCTCGCAGCTACGTGCCAGTTCCAGAGCACCTGTTCCCCTCTACTTTGAAAAG
ASHG19A3A049626	61.6725	79.9786	5.86369	6.3986	noncoding	ENST00000432697	RP11-71L7.1	Ensembl	708	chr13	-	62578225	62603681		GGATTTAGAGTCAAATAGGCAGGTGTTTTGATTCTACCCTTGCTAACCCTGTGACCTTTG
ASHG19A3A030849	641.854	719.898	9.23305	9.57861	noncoding	ENST00000435612	XXyac-YX65C7_A.3	Ensembl	479	chr6	-	169686628	169689311		ATAGAAAATGTTCTGTCTTTGAAGCACTCCAGCCATTTGTTCCCACTGAGCTTGGCTCTG
ASHG19A3A029421	173.677	131.142	7.35638	7.11805	noncoding	ENST00000457945	RP11-125M16.1	Ensembl	894	chr6	-	12583146	12585636		CCGTGCAAATCCTGTTTTCCTTGCATTGTTTCCTGCATGTGAATATCATCAGTCTAGCAG
ASHG19A3A040643	1199.99	1223.07	10.1464	10.3446	noncoding	ENST00000430562	NCRNA00103	Ensembl	984	chrX	+	2527434	2556370	NR_033381,	CCTTGTTCCCAGGGTCCACATTTAGTTTTATCTTTACTGCATTGCTTTTATGAAAAAGAA
ASHG19A3A043835	150.255	102.18	7.15014	6.75029	noncoding	ENST00000423877	RP11-453N3.2	Ensembl	493	chr10	+	39006325	39012607		AACCTAATGGAACCTGGGCTTTGTGCTTCTGCTTGATAATCAGTTCTTTAGTTGAATGGC
ASHG19A3A019019	159.446	158.874	7.23633	7.39632	noncoding	ENST00000443593	RP1-212P9.2	Ensembl	1746	chr1	+	29194086	29197779		GTACCAAGTACTCAACCTTCTGTTTTCTCAATAAAGTGAGCCCTCTTCTCGGTGTCTGCA
ASHG19A3A029275	363.173	356.944	8.41562	8.57146	noncoding	ENST00000430699	BX004987.3	Ensembl	943	chr1	+	143347969	143376699		AGAAAGAAAGATTGGGAAAACGTATCCTCAGCAATTTCCCAAGAAACTGAAGGAAAAGCA
ASHG19A3A040855	124.659	128.278	6.88316	7.08853	noncoding	ENST00000452690	RP11-320G24.1	Ensembl	3000	chrX	+	40122169	40146973		AAATTGACCTCAAAATTTCAGTAGATGAGAGGACTGTGGCTGGCCTGTGTCTTTGGCACT
ASHG19A3A045318	182.425	145.76	7.42786	7.27024	noncoding	ENST00000447028	AP003774.1	Ensembl	672	chr11	-	64092521	64096976		TGGAAACACCCAGCTCTCCACCAAGATAAACCACGCGAGCCACAGCTTGCGGGCAATATC
ASHG19A3A039834	1326.49	1303.56	10.2862	10.4324	noncoding	ENST00000417161	RP11-554K11.2	Ensembl	440	chr1	+	213665643	213719790	BX098234,	AAGTCAAAGAGGGTCTTTGTGTGAAGGATTCTCCACCTCCTTTTCCCTTTCTACGAAGGA
ASHG19A3A013211	549.462	567.15	9.00561	9.2401	noncoding	ENST00000419347	AC019118.3	Ensembl	416	chr2	-	3135756	3149551		AGAATTTAAAGAGGCTGAGTTTTTCATCTCTCTCTGCTGTTTTCTCTCTGGTTTCCCTTT
ASHG19A3A032016	492.227	439.041	8.84527	8.87571	noncoding	ENST00000450059	SIGLECP3	Ensembl	271	chr6	+	121711035	121712027		GGCCATCGGGGAGGCAACTGTGAAGATCTCGTTTCTCTGTCTCTGCCTCATCTTCCTCAG
ASHG19A3A051618	187.619	118.18	7.4668	6.96643	noncoding	ENST00000415338	RP5-998N21.4	Ensembl	3540	chr1	-	149372291	149379646		AGTAAAGTCAAAGAGAAAAGCCATGAACTAAGTATCCTGAACACAGAGGCGTGAGCCCTC
ASHG19A3A022142	77.3023	90.8205	6.19203	6.57447	noncoding	ENST00000455247	RP5-1109J22.3	Ensembl	354	chr1	+	46921494	46948147		GAGCCCCTGGCAGGACCAAGACTCAGGGTCCTCATTGTGGGCCTCTGCAGCTTGTGGAAG
ASHG19A3A017019	1161.33	1057.95	10.0978	10.1287	noncoding	ENST00000442416	AC009502.3	Ensembl	361	chr2	+	220594831	220602464		AAAGGAGGATCTGCCTGCGTTCCTGACATCACCCTTGGGATTTCTCCTCTGCTCTCCAGG
ASHG19A3A029947	82.4018	71.3245	6.28681	6.23517	noncoding	ENST00000451910	RP11-344J7.2	Ensembl	394	chr6	-	43819493	43820070		TCCACCCCATTCTGGCATGGGAAGCATGTGTGGGCTTCTACTCTATGGGAGATTCATAGC
ASHG19A3A041187	6101.06	3456.32	12.4921	11.8298	noncoding	AV714079		RNAdb	721	chrX	+	73164173	73167168	uc004ebo.2,ENST00000415215,	CCTAACCCTTGGGAGAAGGCAAAACACTTGATGAAATCTACATAAAGACTAAAACATTTT
ASHG19A3A015038	2720.91	1947.13	11.3239	11.0199	noncoding	ENST00000438659	AC008281.1	Ensembl	613	chr2	-	220768771	220769610		TGATTTGATTTGATTTCTACTAGTCAAGTGGGCACCTGGATTAAGCAGACTCTCCCCCAG
ASHG19A3A007473	110.989	193.964	6.71982	7.68229	noncoding	NR_027116	LOC285768	RefSeq_NR	2248	chr6	-	961241	1101567		CAAAGGATGACGCATCTCAGAATCAGTGAATTTTAGGAAAATGACTCGATAACTGCAACG
ASHG19A3A018902	1024.21	1042.27	9.91737	10.1075	noncoding	NR_024100	C21orf130	RefSeq_NR	2019	chr21	-	42513426	42519991		GGAAGAAACGCGTATTCCACATTTCCTGTTGATTTTCTTTCCTCCCTAAACACTGACCTC
ASHG19A3A038984	94.4489	104.078	6.48828	6.77835	noncoding	ENST00000432783	RP11-569G13.2	Ensembl	1577	chr9	+	98857492	98864194		TCTCCTATCTCAAGCCATCCTTCAACTTATAGGGACTTTGCACATAGTTGCTGCAGGTTG
ASHG19A3A020199	210.565	156.614	7.63624	7.3756	noncoding	ENST00000450776	AP000343.2	Ensembl	346	chr22	+	23668802	23670680		AAACTCAAAAGAAAAACAACTCAGCTCAGGCATCACCTTTCCTGGAAGGCTTCCCTAGTC
ASHG19A3A027847	64.8012	87.7276	5.93942	6.52531	noncoding	ENST00000412512	RP5-1003J2.4	Ensembl	221	chr1	+	110825155	110825722		AGGAAGCACTGTGCTCCCACTGAAGTGACCTGTGAACACCACTCTGCTCTGCAGGCATGT
ASHG19A3A043518	479.23	405.207	8.81097	8.75683	noncoding	ENST00000439575	RP11-118K6.2	Ensembl	608	chr10	+	3052722	3055303		ATACAGCACATCATTCTGCCTGCTCCGTGGCTTCTGCTTCTCAAGCGACTTAAAATGATT
ASHG19A3A032584	84.3281	90.2348	6.31926	6.56509	noncoding	ENST00000451362	RP11-139I14.2	Ensembl	5586	chr1	+	156358017	156365401		TGACTTACTCATGTGTACACAACTAGTGAGAATCCAGGTGCTCTGTCCACGATACCAACT
ASHG19A3A039551	1195.61	711.636	10.1399	9.56169	noncoding	ENST00000381105	RP11-706O15.7	Ensembl	2118	chrX	-	3847909	3855896		TAGTGCAGGCTGCCATTCAACAAACGCATTGTCAACAGTCAACCAAAAGAAACCCATTGG
ASHG19A3A049389	188.329	145.727	7.47232	7.26991	noncoding	NR_024464	LOC100188949	RefSeq_NR	1589	chr13	-	30914408	30948036		TATTTTTGAGAGATAGTTGAGTGCAAATGAGTCCTGTTCCTCTTGCATCAGGGCCTGCTC
ASHG19A3A007300	101.19	75.2372	6.59028	6.3115	noncoding	NR_024410	LOC254312	RefSeq_NR	1057	chr10	-	10976903	10994126	NR_024411,	AAGATTATTTGCAGGGAAAGAAAAGGGGTCAAAATGTTTTGCCAGTAACTCCCAAATCAT
ASHG19A3A013541	81.2903	76.5582	6.26597	6.34	noncoding	ENST00000418836	AC009413.3	Ensembl	534	chr2	-	42104213	42105095		TAAGGCACAGTTCTGAATCTTTGGTTCTGTAAAGAGGCGTGCCCATCTCTGTGCTTGATT
ASHG19A3A050823	67.5855	87.735	5.99861	6.52555	noncoding	ENST00000439302	BX571672.5	Ensembl	1163	chr1	-	143211527	143272754	ENST00000416817,	CAAAGAAAGGTTGGGAAAACGTATCCTCAGCAATTTCCCAAGAAACTGAAGAAAGAGCAT
ASHG19A3A029874	228.456	225.588	7.75081	7.89889	noncoding	uc003opf.1	BC132805	UCSC_knowngene	3122	chr6	-	40312083	40323745		AAGGACTCTGAAGGGGCCAGTTTCTCACACCTTTTAATCATCTTCCATTTCTCCAGGCAA
ASHG19A3A038373	2066.52	2065.09	10.9207	11.1029	noncoding	ENST00000442260	RP11-284P20.3	Ensembl	436	chr9	+	14025969	14030114		CATCCCAGATCTCTGCATAGCTGTATCTTCCTATCCCTCAAGTTGAAGCATTATCGAAAG
ASHG19A3A050652	1666.32	845.379	10.6156	9.8124	noncoding	ENST00000447500	RP11-206L10.8	Ensembl	523	chr1	-	736258	745541	uc010zpe.1,NR_024437,NM_183421,NM_183420,NM_012173,ENST00000414742,	AATCGGTTAGACTTCTCAAGTGCAATTCAAGATATCCGAAGGTTCAATTATGTGGTCAAA
ASHG19A3A029401	4810.23	8434.55	12.158	13.1137	noncoding	ENST00000420389	RP1-290I10.3	Ensembl	539	chr6	-	10423372	10426409		GACATACAGGAATTATGAAGGATGAAACCATCTCCCCCAGGCCTTCAATAAGTGCAAGTG
ASHG19A3A038529	505.248	457.198	8.88368	8.93117	noncoding	ENST00000457044	RP11-331F9.3	Ensembl	679	chr9	+	35642510	35643514		TCTGGGATTCCCATTCCATTTAGGCCTCCTGATTGCCCCATGTGTCCTTACAATAAACAA
ASHG19A3A049515	92.6677	86.2797	6.46058	6.50269	noncoding	ENST00000414562	RP11-96M12.1	Ensembl	2036	chr13	-	45373638	45383766		AAGTTCAGAACAATTCCCCGAGCAACTTTACCTCACAATCTCATTGGAACGGCTGCATCT
ASHG19A3A000178	2657.42	2402.4	11.2864	11.3182	noncoding	ENST00000425979	AP000475.2	Ensembl	482	chr21	+	23119292	23169735		attctgaggcctccccagacatgtggaactAGTGATGCAGAGATGTGACCCAACGGGTCT
ASHG19A3A000356	248.977	195.832	7.87696	7.69653	noncoding	ENST00000454647	C18orf20	Ensembl	339	chr18	-	61747535	61765844		ATGATCAACCTTCATAGACTGTGCATTATACATGTTGTTGCCACCTTGCTCTCCACTCTC
ASHG19A3A038605	2911.54	2802.88	11.4143	11.5355	noncoding	ENST00000442318	RP11-576D8.4	Ensembl	2885	chr1	+	205425056	205438152		AATCTCTTTCTTCCCTCCTTGTCCGATTCTCTGCTGTAGCTTCCAGTGGAGAAAAATAAT
ASHG19A3A020281	87.2697	97.701	6.36775	6.68242	noncoding	ENST00000422833	RP1-213J1P__B.2	Ensembl	115	chr22	+	28103577	28105929		TGATCGATTCTCCCTGAACAGCCTATTACGGAGGCACTGCAGATCAAGCCCGCCTGGAGA
ASHG19A3A042095	208.285	183.607	7.61853	7.60488	noncoding	AK096133		misc_RNA	2007	chr1	+	236131937	236133945		CATGTAGATTAAAACCTTCCGTATGTCCCCAAATCCCCCAGAACAAAAAACCAACAAAAA
ASHG19A3A015349	131.248	141.203	6.95569	7.22202	noncoding	ENST00000426539	AC130710.1	Ensembl	1096	chr2	+	16190548	16225923		TTTACTTAATGCAGGTTAACTTCATCAACCCTGGTGAAAATGCCACCTCCTCATGAGGAA
ASHG19A3A033876	172.48	225.118	7.3457	7.89615	noncoding	AK024457		NRED	4665	chr7	+	2485266	2489932		TTGAATGGAATCGGGCTCCGTATTGTCCAGATACCTCCCATATTAAAAAAGAACTGGGGC
ASHG19A3A043789	866.209	894.642	9.66839	9.88958	noncoding	ENST00000434552	RP11-490O24.2	Ensembl	631	chr10	+	34198165	34206732		TAAAAGGAGCTCATTTCCTGTAGAGGAACAAACTCCTTTCCTGTCTTCCTGTCTCACTCC
ASHG19A3A008636	203.751	141.453	7.58672	7.2245	noncoding	ENST00000412174	GS1-122H1.1	Ensembl	628	chr1	-	182096431	182097800		CCTTGCATTTATCTTTCTCTCCTACATTGATCTTCACTGGAGAATAAAAATTAGAGACAG
ASHG19A3A031620	142.782	138.149	7.07253	7.19318	noncoding	uc010jzo.2	DM004406	UCSC_knowngene	118	chr6	+	52013720	52013838		AAACGGAACCAAGTCCGTCTTCCTGAGAGGTTTGGTCCCCTTCAACCAGCTACAGCAGGG
ASHG19A3A055283	82.5353	116.031	6.28903	6.93838	noncoding	uc010glg.2	NCRNA00158	UCSC_knowngene	1379	chr21	-	26758133	26804013		AATAAAGAAGAAAACACCCTCAAAGGGAACCCTGAGCAGAACACATGCACAAACTCATGC
ASHG19A3A030736	352.949	308.267	8.37253	8.35983	noncoding	ENST00000449072	RP11-518I13.1	Ensembl	533	chr6	-	156814359	156820905		GAAATCTTGAACTTCTACACCCATCCTTGGCTGGCTTTTTCCATGTGAGGCCATATAGAG
ASHG19A3A000363	6073.05	3927.9	12.488	12.0122	noncoding	ENST00000455754	AC106875.1	Ensembl	1059	chr2	+	11821585	11823449		TTCCCCTTCGCCTTCTGCCGTCATTTGACAGGAAATTAGGATGAGCACGAGCAAAGTCGG
ASHG19A3A042337	199.68	127.281	7.5552	7.07733	noncoding	ENST00000449585	RP11-631M21.1	Ensembl	347	chr10	-	60000	60544		ATTCAGAAATAACAACAACAAAACCAGAGCACCCCGATGCATTTAGGCCTCAAGGAATTC
ASHG19A3A013409	131.702	96.9498	6.96034	6.67076	noncoding	ENST00000444217	AC013472.6	Ensembl	407	chr2	-	27272550	27273132		TTTTTTCCACAACCTTTTGTTCACCGGGTTTTTAACAACAGAAATAAACCTAACCCCCAA
ASHG19A3A020203	159.891	173.177	7.2403	7.52025	noncoding	ENST00000432249	AP000345.4	Ensembl	477	chr22	+	23854680	23855789		TTCATCGAAGCAAAGCATCTCCTGCCACCAAGCACGTCCACGGTATTGGGGATTGATTGC
ASHG19A3A017334	891.779	1041.08	9.71246	10.1062	noncoding	ENST00000445589	RP5-859D4.3	Ensembl	932	chr20	-	6711904	6716783		TTCTTCCTCCCTTCTATTTGGCCTTGGAATACCCTGCAGACAAAGATGGACTTCCTTTAG
ASHG19A3A042353	159.865	175.877	7.24015	7.54475	noncoding	ENST00000438372	RP11-69C17.1	Ensembl	777	chr10	-	2054458	2056542		GGACTGACCGCTTCCTGTCTGGACACCAGTCCTGTAATGCTCTCATCCTTGCTGTCTGAG
ASHG19A3A030993	1960.23	1646.18	10.8452	10.7744	noncoding	ENST00000437559	RP11-456H18.2	Ensembl	784	chr6	+	12007902	12009089		TTCAAGTTATTTCCCTCCTCTAGAATGCTGTACTTCCACCACTGCCAAATCGTGAACTTT
ASHG19A3A039401	15820	11991.2	13.8787	13.6157	noncoding	ENST00000430633	NCRNA00094	Ensembl	2239	chr9	+	136890560	136893224	NR_015427,	TCTCCTTGGCTACACAAATGTGCAGGTGTCTCTTGTCAAAGCTAATTTTTCTTTTCTAAA
ASHG19A3A042136	172.058	145.296	7.34215	7.26539	noncoding	ENST00000422638	RP4-656G21.1	Ensembl	498	chr1	-	30181697	30182394		GCTAGGCACAGACTCCATCTGCCTCTGCCAGGGAGTTTATTAAATAGTTTATTAAATCTC
ASHG19A3A041497	81.8437	86.0704	6.27784	6.50003	noncoding	ENST00000438994	RP11-13E5.2	Ensembl	639	chrX	+	125243744	125249545		GAGCATGGGAACTATGTCTTATTATCTTTTTTATGCTCAATCCCTATCAGAAGTTGTGTA
ASHG19A3A019374	103.724	65.4518	6.62392	6.11163	noncoding	ENST00000423045	AL133492.3	Ensembl	749	chr21	+	47170541	47172900		TTCATGATGGTGGGATGATGACGTAGTTTACGATATTTTGCAGTTACACCCAGTGCAGTG
ASHG19A3A010367	136.88	157.852	7.01397	7.38603	noncoding	NR_027245	C18orf20	RefSeq_NR	885	chr18	-	61747242	61816260		TTAATTTCTCCCTAGTGCTACTTCTCAGATTGGCCAGTGACTCACAGAGTGGCACAAGTA
ASHG19A3A018259	563.433	417.43	9.0393	8.8004	noncoding	ENST00000466530	RP3-477O4.15	Ensembl	3965	chr20	+	34101395	34105360		AAGCAAGAGCTTTTTGGTTCCTCTTGAGGATAGAATCTATAGGAAAATGTAAGAGGGTTA
ASHG19A3A019208	193.651	198.22	7.51351	7.71525	noncoding	ENST00000457157	AP000688.8	Ensembl	811	chr21	+	37377635	37379899		TTCAAAAGCAAAAGTCCCCTACCAGCCAGTGAAGCTACCTGATTTCTCAGTATCTTACGC
ASHG19A3A015673	71.883	100.758	6.08783	6.7281	noncoding	uc002rzk.2	BC043355	UCSC_knowngene	1275	chr2	+	56179292	56408787		AGCCGTCAAAACATGAGAGCCCTCTTTCTAATCATCTCACTTCTTGGAAAAAATAGAATG
ASHG19A3A038771	113.337	126.764	6.74933	7.07112	noncoding	ENST00000427901	RP11-63P12.7	Ensembl	361	chr9	+	74872251	74872699		GTTTCTGTCACTGCAAATCAAAGAGCCCAGCCTAAAATCCTCTGTAGCCTTCTTATTTCC
ASHG19A3A026303	96.7812	75.2522	6.52642	6.31173	noncoding	ENST00000442558	RP11-147C23.1	Ensembl	479	chr1	+	96403456	96488422		TTTGCTCATCTGCTTCTCCAAGTCATCTTTAGTGTGGAGACCTGAACTCATGGAATCATG
ASHG19A3A037148	146.875	128.811	7.11576	7.09399	noncoding	ENST00000443359	RP11-570H19.2	Ensembl	237	chr9	-	18360594	18362218		ATGTGCAACTGCCCCACTTTGAAGAGTGTTAATGTCTCTGTTCCCATAACCAGTAACAGC
ASHG19A3A013625	115.131	111.499	6.77003	6.87948	noncoding	ENST00000443926	AC139712.4	Ensembl	639	chr2	-	52721825	52727890		TTTGGCTGACTACCAAATTTTAATCTCTGTGTTTGTTTTCCGCCCTTTGGCCCACTTTCT
ASHG19A3A043091	663.26	651.303	9.28066	9.43781	noncoding	NR_026835	FLJ37201	RefSeq_NR	3662	chr10	-	91451056	91457685		GCTGTTATTAGCCTGATGAATGTGAATTGATTCCTGTGGCCTTGTCTTCTTTGTTTTGTT
ASHG19A3A017522	151.677	136.167	7.16352	7.17065	noncoding	uc002wvk.2	BC036544	UCSC_knowngene	1212	chr20	-	26167655	26189869		TCTGCCTCCGACCGGTCGTGTGTGGGTTTACTCGGAGGTGCTTTGCCTCTGAAGAAAAGA
ASHG19A3A026106	161.065	119.432	7.25063	6.98178	noncoding	ENST00000413103	RP11-148B18.1	Ensembl	212	chr1	+	94713463	94715048	DB455579,	TTTTTGTACCCTCCTGCAGGGAGCAGGTTCTCTGTCCTTGTTTAATTAGACATTTCTCAG
ASHG19A3A038876	2428.63	2267.14	11.1555	11.2373	noncoding	ENST00000415801	RP11-276H19.1	Ensembl	4387	chr9	+	89563613	89616948	uc004aoy.2,	ATCAACTCCATCTGTCACAAAAATTAAGGCTAAATCTCCTCTCCAGAAGCAGAGGGAGCC
ASHG19A3A026125	506.548	445.944	8.88698	8.89957	noncoding	ENST00000418242	RP11-148B18.3	Ensembl	480	chr1	+	94798822	94800404		GTTTGATGTCCTTCTTCTGTTCCCTATTCTAGGTCTGGGCTTGATGTTCACCGATTTTCC
ASHG19A3A019612	152.541	118.459	7.1715	6.96984	noncoding	ENST00000421153	RP4-811H24.8	Ensembl	267	chr1	+	32817121	32819143		CAGTGAAAAGCCAAAAGTAAAACCTAGGCTTTCTACAACTCTGCCTGCTCCTACAAAAGG
ASHG19A3A014280	160.46	154.815	7.2456	7.35819	noncoding	ENST00000451749	AC073409.1	Ensembl	269	chr2	-	124200841	124202021		GTGTAGAAAAAACAAGAAAATTGTGTACCTAACTCTCCATGGTAACCTCTCTCACTTTTT
ASHG19A3A037793	163.84	170.059	7.27416	7.49338	noncoding	ENST00000430058	RP11-23B15.1	Ensembl	204	chr9	-	100568216	100572290		ATGTTCCCTGTCTTGGGAGCCTTTCTTCAGGGAGCTTGATGGTTCCAACCCACCCAGGAG
ASHG19A3A040750	96.6712	78.4414	6.52472	6.37212	noncoding	ENST00000442155	GS1-433O24.1	Ensembl	382	chrX	+	22716573	22787083		TTTGTGTTGTCCATCATGCTCAAGTGCCTATTAAAAAGCCTGCTTATTTATTGGTAATGA
ASHG19A3A038956	169.681	205.245	7.32166	7.7667	noncoding	ENST00000443771	RP11-53B5.1	Ensembl	391	chr9	+	96619364	96620615		CCATATTTGATATAGACCCATCAATGGCTCCCTAGAATAAAATCTCAACTCTTCACTGTG
ASHG19A3A050309	652.917	575.779	9.25815	9.26243	noncoding	ENST00000423907	RP4-655J12.4	Ensembl	454	chr1	-	116966345	117021430		AACATCTTCCTCTCAAGTGAACAGTGCTTACCGCTTCAAGCATCCAGTCTCAGCAATAAG
ASHG19A3A030553	111.59	105.308	6.72891	6.79546	noncoding	ENST00000419627	RP3-323P13.2	Ensembl	244	chr6	-	134081322	134167089	uc003qeg.1,	GACAGATCAGTCTCTCTCCTGATAAGAAGAGTCACCAAGAGGAACATCTGCAACAACTAG
ASHG19A3A030633	220.157	99.891	7.69938	6.71707	noncoding	ENST00000421237	RP11-439L18.2	Ensembl	402	chr6	-	143267183	143277835		CGGCCTCCTACTTACGCTGTAAACAGCTGCATTTTAGTCTTTAGCCTTGTTAGATCTCAT
ASHG19A3A031127	5379.49	7366.89	12.3145	12.9202	noncoding	NR_026790	HCG11	RefSeq_NR	5688	chr6	+	26521933	26527610		GCTTGTGATTGTGAATGACTTTGTTGTTTGCTTCTTGTGATTTTCAGTTTCCTATAATGC
ASHG19A3A020275	191.923	156.508	7.50018	7.37466	noncoding	ENST00000438113	RP1-90L6.3	Ensembl	517	chr22	+	27299302	27316574		TTTTTGTTTCTCTCAGCTAAGTGGATCCCTGAGTCCTCCTGGTGCAGTGGAAAGATTTGA
ASHG19A3A020036	96.4967	68.1387	6.52104	6.17	noncoding	NR_015352	CECR7	RefSeq_NR	2726	chr22	+	17517459	17539682		CACTGAGTTTTTCCTCCATTGTTGTAAAACATGTGTTTTGCTCTTGTGTGTAAAATGACT
ASHG19A3A029497	139.668	141.917	7.04258	7.22853	noncoding	ENST00000416595	RP3-425P12.1	Ensembl	430	chr6	-	25053854	25057301		GTCTTTAACCCACTTCTCTTCTGCCGAGACTGAAAAGGATCCAAATCTCATGGCATTAAG
ASHG19A3A011383	430.885	338.905	8.65848	8.49358	noncoding	ENST00000412445	RP11-815M8.1	Ensembl	605	chr1	-	222086989	222151865		TTCACCGGGCTTTCTACTTTTGAATTCTCTCCATAGCTGGTTTCCTCTTAGGCCTCGATA
ASHG19A3A046723	161.484	159.923	7.25428	7.40594	noncoding	uc001daw.1	BC040309	UCSC_knowngene	1093	chr1	-	63635822	63782901	ENST00000447183,	TACAATTGGCTTAGCTGCCTCACTGATAAATGTGCCCCCAGTAAGCTACAAAGGGATTAC
ASHG19A3A020114	88.9065	84.6803	6.39676	6.47885	noncoding	ENST00000424812	AC023490.1	Ensembl	463	chr22	+	20378813	20380089	uc010gtf.1,uc002zsa.1,NR_026815,ENST00000449424,ENST00000436618,	TTCTACGGAGGGGAACCGCAGAGCCAGAAGAGCACGGAGCAGCAACTCGCAGCCCAATTG
ASHG19A3A040497	141.715	123.024	7.06262	7.02626	noncoding	ENST00000456072	L29074.3	Ensembl	534	chrX	-	146981695	146982977		TTTGTAATGCCTGCCTTGGTTATGGATGTGACACCTAAAGTTAGGGAAACCTTGAGGCTG
ASHG19A3A017973	1345.3	638.309	10.3052	9.40887	noncoding	ENST00000447956	RP11-128M1.1	Ensembl	415	chr20	+	2187862	2193797		CTGCTACTGTGTGTTTGCTGGTTCCAATGATACATAATTTGTGCTTTTCGTAATTAAAGT
ASHG19A3A019454	112.899	74.8992	6.74452	6.30625	noncoding	HIT000221891		H-invDB	245	chr22	-	18980092	18980335		ATAAACAGTGCTGTGGCAAGGTGTGGCCTCTTGTGGGTAAAGCCAGACCCCAAAGCTGGG
ASHG19A3A009870	127.789	113.459	6.91849	6.9054	noncoding	uc002jil.2	BC094791	UCSC_knowngene	3088	chr17	+	67586135	67624477		AACCAATAACTTCAATAAAAGTGCTGTATCCCCTGGCAGATGATGAGTATCTTCAAGATG
ASHG19A3A020201	159.756	155.378	7.23911	7.36366	noncoding	ENST00000449711	AP000344.3	Ensembl	917	chr22	+	23775750	23777258		TAAAACAGCAAATTTCTGTGCCTGTGCTGTCGGGCTGTGAATGACTTCTCGTCTGTTTCA
ASHG19A3A049723	1593.3	1637.49	10.5527	10.7629	noncoding	ENST00000442478	RP11-51B13.1	Ensembl	353	chr13	-	91739507	91741847		AAACAAGGGTGATCCACATCCCCCATCCCTCATCTTAAAGTCAGGTTCATAACGGATAAG
ASHG19A3A049923	906.765	828.055	9.73591	9.78364	noncoding	ENST00000427890	RP11-101P17.6	Ensembl	621	chr13	+	21834167	21867568	NM_177974,NM_138423,	CCAGATCCTGAAAGGCATTAAATCTACTTTGAAATGAATCTGCAATCAGTATTTCAAAGC
ASHG19A3A050011	81.0391	79.7301	6.26162	6.39507	noncoding	ENST00000453470	RP11-90M5.5	Ensembl	913	chr13	+	30446749	30462542		TAGAGATACATGTAAAATTTGAATTTTAGCCAGAGCAGAGATGCCAGCCCTGACCCTGAT
ASHG19A3A043396	92.2385	72.3366	6.45359	6.25583	noncoding	ENST00000435782	RP11-285A18.2	Ensembl	389	chr10	-	125673089	125691113		TTATCTCTGCGGACCTGGAGCTGCTGGTCACCATGGAAACAGAAGCTTTTGTTCACCACT
ASHG19A3A040287	309.924	322.31	8.18998	8.42202	noncoding	ENST00000440104	RP11-103C3.1	Ensembl	807	chr1	+	221681900	221684321		TTTTCTACCATACTGATAGGCCCACTGATGAACCTTTACAGTCCTCCTCTTTGAGCCATG
ASHG19A3A049506	2338.37	2817.41	11.1003	11.5434	noncoding	ENST00000432331	RP11-478K15.1	Ensembl	340	chr13	-	44680513	44711372		TTTCGAAAATATTGCCAGAGAGATTGAAATAATTCACCACTGCCCCTCCTCCAGCTTCTC
ASHG19A3A037695	321.876	166.193	8.24413	7.4598	noncoding	ENST00000415471	RP11-100G15.10	Ensembl	211	chr9	-	94912662	94919727	NM_174937,	ATTACACAAAATCGTGTTTGACCCACGCTATCTCCTGCTCAACTCTGAGGAACGAAAGCA
ASHG19A3A020522	276.526	442.284	8.02823	8.88661	noncoding	ENST00000420096	Z83851.4	Ensembl	544	chr22	+	42672360	42673057		CTGAGCGGCTTCACCATTCAAGTTTATTCCTATCAGCCTGGAATACAATGCTCTATCTGG
ASHG19A3A007175	354.354	322.415	8.37891	8.4227	noncoding	NR_015353	LOC92249	RefSeq_NR	2886	chrX	-	62646438	62780873		ATTATATGCTTTCCTTTGCTCCCAGGTCCTGCAACCCTGGTTCCAGTCTGGCAAGCATTG
ASHG19A3A020326	22002.1	13233.3	14.3435	13.7599	noncoding	AB073661		NRED	2686	chr22	+	31371385	31374065	uc003ajj.2,NR_002323,ENST00000450248,	AGTAGTGCAGAAATGAGTCCGATTCACCAGTACACACAGAACTGTACCAGTTCAACCTAG
ASHG19A3A019062	171.38	146.864	7.33732	7.28064	noncoding	ENST00000430391	AF127577.8	Ensembl	781	chr21	+	16290854	16319417		AGTGAAAACATATGGTGTCCATCTTGTAAGCATAAGGCTCCCTGGTATTGCTGCCACTCT
ASHG19A3A017216	343.976	413.068	8.3339	8.78457	noncoding	ENST00000433036	AC133528.2	Ensembl	415	chr2	+	242629828	242633704		ACTGTCTGTCCAGGAGCAATGGGAGCAAGAGTCACTCCACGAGACTCTGGAGGCCTGATA
ASHG19A3A035273	695.061	556.292	9.35247	9.21645	noncoding	AF088026		RNAdb	703	chr1	+	173832385	173833077	ENST00000416578,	GATGAAAAGCACTGTCCTTTTTTAAGTAAACACTACACACTCCAGATGGATTGCAAAAAT
ASHG19A3A036934	200.667	191.916	7.56231	7.66669	noncoding	ENST00000457321	RP5-1011O1.3	Ensembl	684	chr1	+	192498708	192507232		GAATCAGATTTGGCTCTTCACTTCTGCCTTCAGTGCTGTCCAGACTCAGACATTATATCA
ASHG19A3A015381	135.729	98.5363	7.00174	6.69475	noncoding	ENST00000419013	AC096570.2	Ensembl	569	chr2	+	22600465	22704876		AAATCATGCTGGCAGTCTATTGAGCCTGTGGTTTTGGCTGGTGTGAAGATGTTGAAGGAA
ASHG19A3A031744	115.774	110.648	6.77798	6.86741	noncoding	ENST00000455554	RP11-35J1.1	Ensembl	569	chr6	+	77232167	77303340		ATTCTTCTTCCTAGAGTGGACTCATTTCCATTTGTCTCTGCAGTGAGTACTTCCAGAACT
ASHG19A3A050199	208.98	241.479	7.62348	7.99778	noncoding	ENST00000413926	RP11-547C18.2	Ensembl	606	chr13	+	51657936	51659535		AAAGAGCTCTGCATCCCACTCCATATCTTCTCCTGAGAAGTTGAAAAGGATCTGTCTGGA
ASHG19A3A015757	124.022	123.623	6.87585	7.03386	noncoding	uc002sdx.2	BC040863	UCSC_knowngene	681	chr2	+	67313577	67516371	ENST00000452716,	TAATTACAGCAATGATCTTAGCCAGCCCCCATACATTTTGGGACACACAGGTTCAGGACT
ASHG19A3A040340	130.421	87.9677	6.94657	6.53005	noncoding	NR_027131	CXorf42	RefSeq_NR	2434	chrX	-	119370310	119379122		GGAATGTCAGCTCATAAAATGAGGCTTCCTTGTAATTCTGTTTAAATGACTTTTCCTTTG
ASHG19A3A043502	274.937	280.153	8.01999	8.21763	noncoding	uc009xhl.2	BC127786	UCSC_knowngene	269	chr10	+	988074	988583	ENST00000435531,	TTTTAGAAAGAAAGATACTGATATGCCACTGATGTGGTTTGGATGTGCGTCCCTCCACCC
ASHG19A3A013242	319.033	143.293	8.23084	7.24268	noncoding	ENST00000431336	AC097517.2	Ensembl	569	chr2	-	6779254	6790651		ACTGTGGTGGATTATCTGCAAAGATGGCCAAAATTCTCTCATCCCTGCAGGCACATACAA
ASHG19A3A031503	133.162	92.1595	6.97483	6.59697	noncoding	ENST00000468538	RP1-149M18.4	Ensembl	743	chr6	+	41373556	41374299		GTGGAAACTTTTAGACACAAACTGGCCCCTGTGTTTAAGTCATTAAAACATCTTTAAGCA
ASHG19A3A049346	79.549	66.9302	6.23496	6.14349	noncoding	ENST00000444744	RP11-428O18.4	Ensembl	420	chr13	-	27810418	27810948		AATGAAATAGGGGAGCAATTAGACTTCTGTCTGGTGAGTAGATTAAAATATTTCTGCTGA
ASHG19A3A018163	422.514	603.718	8.62901	9.32814	noncoding	ENST00000376445	RP13-401N8.1	Ensembl	320	chr20	+	25731853	25733397		CTGCAGAAAATCAAGCTTTGAGCGGGAAGCTTCGAGGAGACACAGTGTCACAATTACAAG
ASHG19A3A050053	193.688	161.133	7.51405	7.41714	noncoding	ENST00000456848	RP11-270C18.2	Ensembl	643	chr13	+	36271863	36273393		ACCTTGTTAATCTCCAGTGGTGATGAGTAACCGTTCTCTCTATCACATATCACATACTGG
ASHG19A3A000362	473.208	637.827	8.79197	9.40709	noncoding	ENST00000455568	NCRNA00087	Ensembl	471	chrX	-	134229142	134232388		GGTGACCCGCCCCTTCTCTGGCCTTCTGCGTGATGGGGTCTCCATGCACTTTATTTATTT
ASHG19A3A019378	1879.3	1894.81	10.7912	10.9818	noncoding	ENST00000451618	AP001476.2	Ensembl	2198	chr21	+	47456965	47459721		CACACAGCTCCTTCTGCCTCACCCACACCCCGCCAGACCCTGAGCGCTCACGAAGTCTCC
ASHG19A3A044163	114.774	104.85	6.76575	6.78913	noncoding	ENST00000429250	RP11-90J7.3	Ensembl	607	chr10	+	80008496	80310446		GGGAGTCCAGCTTTCAACAAAGCCAATCTATTCAATCTCCAGACTACCCTTTGTACCAAG
ASHG19A3A039321	182.008	321.503	7.42344	8.41786	noncoding	uc004bxu.2	BC094873	UCSC_knowngene	1213	chr9	+	132105694	132106907		GCAGAACCAGGTGACTGCACTGCTGTAGACCCACCAGCGGCATTGAAAAAACCCTCACCA
ASHG19A3A018411	313.05	303.71	8.2027	8.33885	noncoding	ENST00000416646	RP11-347D21.2	Ensembl	456	chr20	+	46586765	46587347	uc002xts.1,	TGTCCTCCAGCAGCTCTAGCCTGGATGCGGTCCCAGAGATAAATCATATCTCTTTAAAAA
ASHG19A3A055081	123.043	97.2102	6.86539	6.67428	noncoding	uc001hpx.2	BC032899	UCSC_knowngene	502	chr1	+	226271655	226277990	ENST00000412855,	TGCACGTGCCCAATCCCGTGGCGGGGCTGGAACACAAACGGGGTGGTGTTCCAGCTGCAA
ASHG19A3A014394	305.972	286.692	8.17059	8.25079	noncoding	ENST00000440802	AC097532.2	Ensembl	322	chr2	-	133043367	133051950		TGGTCTCGATGAGAGTGTGCCACGTAAGTTTCCCCCATTAAAAGTCATGAATTCAGTGGA
ASHG19A3A011709	658.109	592.337	9.26982	9.30288	noncoding	ENST00000441809	CTA-520D8.2	Ensembl	1007	chr1	-	13983805	13987033		AACTGCCCTTTATTACATGGTCACAAATAAAGTTGCAGCTAGGAAAGGGATGGGCAGAAA
ASHG19A3A009852	389.95	409.99	8.517	8.77333	noncoding	uc002jgo.1	CR595591	UCSC_knowngene	607	chr17	+	66110552	66157623		TCTCTTTTTCTGTCTAAGACTCACTCCATACCAGCCTGAGCTTGGGACCATTGTTTTGCT
ASHG19A3A018098	1215.31	1153.61	10.1632	10.2607	noncoding	NR_026885	LOC100270804	RefSeq_NR	2034	chr20	+	18774692	18776708		GCTGACATCATTGGAAAAGTGCATCACTTAGAAAATGTATCTGTGTGTCAATTTTGTTTG
ASHG19A3A045281	722.05	628.732	9.40559	9.38599	noncoding	ENST00000420876	RP11-511I2.2	Ensembl	483	chr1	-	47846599	47874149		TATATGGCGGCAGCCAGAAATTCAACTTTGTCCATCAGCTCTCTGCACAACAGGAAAGAT
ASHG19A3A038079	244.113	199.135	7.84567	7.72142	noncoding	NR_033374	LOC100289019	RefSeq_NR	3842	chr9	-	130873449	130881013		TTCCTTCTGTTTCCCCTCTTGCAGAAGGAGATCCGGTTGGCAGCTAAACCGCGCTGGGAA
ASHG19A3A017892	1408.88	771.202	10.3715	9.68138	noncoding	ENST00000412500	RP5-885L7.10	Ensembl	540	chr20	-	61405479	61406764		GGGATTAGCGGAGATCCACTCTTTCATATTTAAATCTTCACAAGAGAATGAATCACTTTT
ASHG19A3A014168	154.366	219.501	7.18836	7.8631	noncoding	ENST00000424355	AC023672.2	Ensembl	388	chr2	-	108665655	108669211		TTCAGGGAAAAATAATCTCAGCGTAGCATCCCTGTAAGCCTGTCTCCATCTTACTTGAAG
ASHG19A3A042726	139.345	82.1571	7.03934	6.43601	noncoding	uc001jef.2	LOC643650	UCSC_knowngene	2876	chr10	-	47096454	47151400		TCTTAACAGCTGAGCAGTCTGTTTCTCCAATCAGGTTTCAAAGCCACTTCAACTGCACTG
ASHG19A3A019554	121.186	126.025	6.8414	7.06157	noncoding	ENST00000438185	LL22NC03-102D1.18	Ensembl	451	chr22	-	23035262	23035797		TCTAGGTGTGGATTCAGAACCTGCTGTTCAGGTCCCTGATGCCCTGATCCGAGGACTGCT
ASHG19A3A015408	147.433	153.392	7.12049	7.34568	noncoding	ENST00000431650	AC012457.2	Ensembl	466	chr2	+	25427181	25432071		AGTGTTCACCGCTAGAAGTGTTCCCTTGTCAAAGAAAGAAGCCATCCCTTGTCAGTAGAT
ASHG19A3A043536	122.162	113.33	6.85464	6.90303	noncoding	ENST00000434902	RP11-34C15.1	Ensembl	869	chr10	+	4448693	4451443		ACCCAGGGCTGTTCTGTTTCTGACTCAAGATATTGGAGCAAGCTATGCCTCTCCATGGAG
ASHG19A3A040629	462.376	683.627	8.75819	9.50582	noncoding	uc011mgz.1	NCRNA00107	UCSC_knowngene	668	chrX	+	281384	282052	uc011nag.1,NR_027232,NR_027231,	TTATCTCAGTTGGCCTCTGAATGTTTATCCTACAGCTTCCTGCAAGCTCCAGTCTACCTT
ASHG19A3A032409	178.183	159.937	7.39254	7.40619	noncoding	ENST00000414126	AC073316.2	Ensembl	418	chr7	-	3236257	3237888		GAGTTTAGTTTCCAGTTGGCTTCCCTGAGGGTGTTGGATAAAATTGCAATTTAGATTCAA
ASHG19A3A032179	3425.98	2706.89	11.6672	11.4871	noncoding	uc003qmb.2	BC043173	UCSC_knowngene	1473	chr6	+	147708803	147711601		ATGAATGTCTCTTTATGCTGAAGGGCTCTGATTGGGCAAAATAAAATACTCTAATCTCTC
ASHG19A3A015351	88.1731	123.78	6.38503	7.03544	noncoding	ENST00000420404	AC010745.2	Ensembl	839	chr2	+	16405314	16410408		GATAGACAGGCACTCCACCTAGCGAAGTACAACCATCCCAAACTTATTCCTATTACTTTT
ASHG19A3A038923	550.87	289.976	9.01012	8.26548	noncoding	ENST00000442072	RP11-440G5.2	Ensembl	474	chr9	+	94188519	94189426		ATCAATTGCTGTTTCCAGGAGCCCACAGCTCCAATTACTCAAAAGAACGTTGACTTTTTT
ASHG19A3A015361	114.308	99.5025	6.76075	6.71092	noncoding	ENST00000431697	AC106053.1	Ensembl	368	chr2	+	18966072	18969018		AAATTATCTGTTCATGTGCGTATTTCCTCCAGTAGACAATAAACTCCTTAACTCCAGGAA
ASHG19A3A038512	119.533	136.177	6.8225	7.17093	noncoding	ENST00000434627	RP11-195F19.9	Ensembl	665	chr9	+	34665661	34681295		GGTATTACTACTACTCAGCAAGATTCTGGTTTTACTTCTCATCTTGGGAGTTACCATCAA
ASHG19A3A009384	142.444	125.297	7.06946	7.0528	noncoding	ENST00000444464	AC084809.3	Ensembl	512	chr17	+	31232679	31233602		GTGTTTTTGGCCTCCAGCTTACTTCGTGAACATAATAAAGGAAAGGCATTTTCTCTTGTG
ASHG19A3A050319	69.5179	76.7815	6.04126	6.344	noncoding	ENST00000456414	RP5-1086K13.1	Ensembl	2295	chr1	-	117035644	117041834		AATCTTAAGAGTTTCTGTTCAAGGTCAGTTTGTCTCTCTCAGACCGTGGCACCAAGGAAC
ASHG19A3A049885	229.763	302.242	7.75848	8.33105	noncoding	ENST00000422609	RP11-484H12.5	Ensembl	458	chr13	+	19246966	19250303	ENST00000444356,	TGAAACCTTAAACTCTTACTGATTCTTTAAACTGTCCCCATTCCACTTTTCTCTGCAGCA
ASHG19A3A016518	646.904	724.265	9.2442	9.58897	noncoding	uc002ubt.1	AK027541	UCSC_knowngene	2013	chr2	+	162101249	162105241	ENST00000439050,	GTCTTCCAAGAAGCCTGGTTTCCACCTGGAAAATAAATTACTAAATTTGAATGTGTTACT
ASHG19A3A015164	251.447	209.537	7.89201	7.79671	noncoding	ENST00000452982	RP11-431K24.3	Ensembl	497	chr1	+	8268731	8275270		TGATGGGGAAGCTTGTCCTCTGCTTTGTCACACACAAAACTCTAAAAGTCAGCATCCCAA
ASHG19A3A047476	280.034	398.582	8.04456	8.73042	noncoding	ENST00000458146	RP11-339D23.1	Ensembl	580	chr1	-	80839048	80840306		CAATGACTGAGAATACCCTGAGATTCCATCTGTAAATGGACAGTATAAATAAATGTGGTA
ASHG19A3A018455	241.917	271.843	7.83344	8.17287	noncoding	ENST00000421642	RP4-715N11.2	Ensembl	486	chr20	+	51288455	51307147		AATGGTTCCTGCTTTCACTATTCCAGATGTCCAGCTCTGTACCTTGCTGCTCTCCTTAAA
ASHG19A3A023197	599.537	691.455	9.13204	9.52048	noncoding	uc001czf.2	AK055150	UCSC_knowngene	1123	chr1	+	59250822	59365384		TATTCTCCCACAAAATCCAGAGCTGCCAAACACATCCTCCTCCATGAGTCTTGCTTTGTG
ASHG19A3A015084	1476.7	966.183	10.4414	10.002	noncoding	ENST00000432481	AC009410.1	Ensembl	678	chr2	-	229347976	229476111		AGACTTCATCTAATGTCTCTTCGGTATGAGTGCACACTTCCTCCCTGGAGCCTTCATATA
ASHG19A3A009851	16159.5	13656.6	13.9127	13.8082	noncoding	NR_027418	LOC651250	RefSeq_NR	11210	chr17	+	66097695	66132068		CTGACAAACCTTTGAGACTGTAAATGACCTGAGGTATACATTATCTTTACTTGAGAATAG
ASHG19A3A039791	238.906	272.558	7.81461	8.17654	noncoding	uc004dgk.1	AK098783	UCSC_knowngene	1961	chrX	-	45707326	45710447		ATTTTTGTCTTTTGGAGCAAATGTTTTGCCACTTTTTCCCCAGATGTCCCCGTTAGATGC
ASHG19A3A042430	127.991	145.905	6.92064	7.27148	noncoding	ENST00000435106	RP11-271F18.2	Ensembl	1251	chr10	-	10477911	10504248		TGCTGAAGAAGGTTCAACCAAAGAAGCCTCACATCTTTTGTTCTCCTGGCTGAAAACCAT
ASHG19A3A037743	162.157	101.658	7.25921	6.7411	noncoding	ENST00000433644	RP11-435O5.2	Ensembl	739	chr9	-	98177780	98189078		TTTCAATAGTCCAGACAGCTTCCAACCAAAGATGTGGAGGCACAATCTTTGCCTGGTAGA
ASHG19A3A029873	790.488	732.218	9.53829	9.60471	noncoding	ENST00000373171	RP11-552E20.3	Ensembl	554	chr6	-	40312082	40313890	uc003opf.1,	TCTAGGCCCTCTGATCCCTCTGTAAGTCGCTATTTCCCTTATTAAATCTCTTTCTGCTGG
ASHG19A3A038913	122.591	101.693	6.8594	6.74155	noncoding	ENST00000446201	RP11-406A20.1	Ensembl	457	chr9	+	92740563	92749768		TAAAATCAGCCAGAAAGGTTTAGGATCCCATTTCCTGTTCTTGCATCGGCTGTCCAAGCT
ASHG19A3A012347	738.676	731.311	9.43842	9.60303	noncoding	ENST00000436739	RP5-858B6.1	Ensembl	311	chr1	-	230959386	230960453		TCCTGTTGGATCCCACATGTGTTTCCTCCCTGGCTTGTGGAAGAAAATGTGTTCTCCAAA
ASHG19A3A016231	447.492	558.899	8.71448	9.22266	noncoding	ENST00000441329	RP11-395L14.16	Ensembl	413	chr2	+	114261181	114262184	ENST00000416242,	GCGCACGCCTGACCGGAGCACCCCGCTTCACGGGGGCGTTCTGCGCGTCCTTCCTCCCCG
ASHG19A3A046586	589.4	649.07	9.10682	9.43316	noncoding	uc001czt.1	AK097193	UCSC_knowngene	2344	chr1	-	61125302	61291256		ATATCTGGGTTTTCTTCTCTTTTCTCCAGCCTCTGCCTCTGAATGTGAAGGGAAACTGGA
ASHG19A3A045723	165.713	172.142	7.28946	7.51124	noncoding	ENST00000457746	AP006216.5	Ensembl	333	chr11	-	116683919	116684719		CAAAAGCAGCTCCTGCATGGGGACGCCGTGTCCTCCTGCTGTTATCATAGTATGCCCTGT
