# Supplementary material for: The Role of PinX1 in Growth Control of Breast Cancer Cells and Its Potential Molecular Mechanism by mRNA and lncRNA Expression Profiles Screening
Source: Biomed Res Int. 2014 Feb 3;2014:978984. doi: 10.1155/2014/978984 (PMC3929369; doi:10.1155/2014/978984)
Supplement: Supplementary file 1 — Human LncRNA Array V2.0 was applied for screening the alterations of lncRNA and mRNA expression profile between PinX1 overexpressed and control MCF-7 cells. After the quantile normalization and data filtering steps, the mRNA expression profile data qualified for fold-change comparison was listed in Tables S1, and lncRNA expression profile data was listed in Table S2. The differentially expressed mRNAs was listed in Tables S3 and differentially expressed lncRNAs was listed in Tables S4. GO analysis of the differentially expressed mRNAs by biological processes, cellular components and molecular functions was showed in Table S5. Profiling data of enhancer-like lncRNAs was listed in Table S6. The enhancer-like lncRNAs and their adjacent coding gene pairs was listed in Table S7. Profiling data of the Rinn lincRNAs was listed in Table S8. The Rinn lincRNAs and their adjacent coding gene pairs was listed in Table S9. Profiling data of the Hox clusters was listed in Table S10. [file 978984.f1.zip › 978984.f1/Table S7.xls]

## Sheet: Enhancer lncRNAs nearby coding 
# Condition pairs: pcDNA3.1-PinX1 vs Empty Vector # Fold Change cut-off: 2.0 This table contains the differentially expressed enhancer-like LncRNAs and their nearby coding genes (distance < 300 kb). # Column A: seqname, the sequence identifier. # Column B: GeneSymbol, the symbol of the LncRNA. # Column C: Fold change - LncRNAs, the ratio of normalized intensities between two samples, positive val…
seqname	GeneSymbol	Fold change - LncRNAs	Log Fold change - LncRNAs	Absolute Fold change - LncRNAs	Regulation - LncRNAs	source	RNAlength	Chrom	Strand	txStart	txEnd	GenomeRelationship	NearbyGene	NearbyGeneSymbol	NearbyProteinName	Fold change - mRNAs	Log Fold change - mRNAs	Absolute Fold change - mRNAs	Regulation - mRNAs	NearbyGeneChrom	NearbyGeneStrand	NearbyGenetxStart	NearbyGenetxEnd
uc003ojj.2	CR624291	-2.48251	-1.3118	2.48251	down	UCSC_knowngene	2513	chr6	-	34247456	34249969	upstream	NM_012391	SPDEF	SAM pointed domain-containing Ets transcription	-4.83679	-2.27405	4.83679	down	chr6	-	34505579	34524091
ENST00000431979	AC093838.7	-3.67616	-1.8782	3.67616	down	Ensembl	3516	chr2	+	132394597	132407188	upstream	NM_138770	CCDC74A	coiled-coil domain-containing protein 74A	-2.15985	-1.11093	2.15985	down	chr2	+	132285491	132291239
ENST00000453395	LA16c-83F12.6	-2.63454	-1.39755	2.63454	down	Ensembl	624	chr22	-	16199665	16231333	upstream	NM_001136213	POTEH	POTE ankyrin domain family member H	-2.80404	-1.48751	2.80404	down	chr22	-	16256331	16287937
ENST00000416894	RP11-54A4.8	3.17671	1.66753	3.17671	up	Ensembl	566	chr1	+	150488232	150490508	upstream	NM_016022	APH1A	gamma-secretase subunit APH-1A isoform 2	-2.09668	-1.0681	2.09668	down	chr1	-	150237798	150241532
ENST00000442526	RP11-517P14.2	2.13644	1.09521	2.13644	up	Ensembl	303	chr10	+	43916046	43917254	upstream	NM_020975	RET	proto-oncogene tyrosine-protein kinase receptor	-2.14956	-1.10404	2.14956	down	chr10	+	43572516	43625797
uc001ihe.3	LOC100216001	3.00343	1.58661	3.00343	up	UCSC_knowngene	2553	chr10	-	4621443	4720262	upstream	NM_001353	AKR1C1	aldo-keto reductase family 1 member C1	-3.8853	-1.95803	3.8853	down	chr10	+	5005453	5020158
uc002zll.1	CR605662	2.92404	1.54796	2.92404	up	UCSC_knowngene	1732	chr22	+	16373080	16377057	upstream	NM_001136213	POTEH	POTE ankyrin domain family member H	-2.80404	-1.48751	2.80404	down	chr22	-	16256331	16287937
BC062773		2.04537	1.03236	2.04537	up	misc_RNA	859	chr1	+	32320889	32321713	downstream	NM_006559	KHDRBS1	KH domain-containing, RNA-binding, signal	-2.09933	-1.06993	2.09933	down	chr1	+	32479490	32509472
BC062773		2.04537	1.03236	2.04537	up	misc_RNA	859	chr1	+	32320889	32321713	upstream	NM_144569	SPOCD1	SPOC domain-containing protein 1	-4.07685	-2.02746	4.07685	down	chr1	-	32256024	32281580
ENST00000480386	RP11-357H14.4	2.62512	1.39238	2.62512	up	Ensembl	566	chr17	+	46706036	46712294	upstream	NM_001075099	SKAP1	src kinase-associated phosphoprotein 1 isoform	-2.09242	-1.06517	2.09242	down	chr17	-	46210801	46507594
ENST00000431395	RP11-124O11.2	-3.22426	-1.68897	3.22426	down	Ensembl	500	chr10	-	43474464	43476955	upstream	NM_020975	RET	proto-oncogene tyrosine-protein kinase receptor	-2.14956	-1.10404	2.14956	down	chr10	+	43572516	43625797
