# Supplementary material for: The Role of PinX1 in Growth Control of Breast Cancer Cells and Its Potential Molecular Mechanism by mRNA and lncRNA Expression Profiles Screening
Source: Biomed Res Int. 2014 Feb 3;2014:978984. doi: 10.1155/2014/978984 (PMC3929369; doi:10.1155/2014/978984)
Supplement: Supplementary file 1 — Human LncRNA Array V2.0 was applied for screening the alterations of lncRNA and mRNA expression profile between PinX1 overexpressed and control MCF-7 cells. After the quantile normalization and data filtering steps, the mRNA expression profile data qualified for fold-change comparison was listed in Tables S1, and lncRNA expression profile data was listed in Table S2. The differentially expressed mRNAs was listed in Tables S3 and differentially expressed lncRNAs was listed in Tables S4. GO analysis of the differentially expressed mRNAs by biological processes, cellular components and molecular functions was showed in Table S5. Profiling data of enhancer-like lncRNAs was listed in Table S6. The enhancer-like lncRNAs and their adjacent coding gene pairs was listed in Table S7. Profiling data of the Rinn lincRNAs was listed in Table S8. The Rinn lincRNAs and their adjacent coding gene pairs was listed in Table S9. Profiling data of the Hox clusters was listed in Table S10. [file 978984.f1.zip › 978984.f1/Table S8.xls]

## Sheet: Rinn lincRNAs profiling
Rinn lincRNAs profiling (Entities where at least 2 out of 2 samples have flags in Present or Marginal). This table contains profiling data of all probes for lincRNAs based on John Rinn's papers (Guttman, M., et al. 2009, Khalil, A.M., et al. 2009). # Column A: ProbeName, it represents the probe name. # Column B ~ C: Raw Intensity of each sample. # Column D ~ E: Normalized Intensity of each sample…
	Raw Intensity		Normalized Intensity		Annotations
ProbeName	[Empty Vector](raw)	[pcDNA3.1-PinX1](raw)	[Empty Vector](normalized)	[pcDNA3.1-PinX1](normalized)	type	seqname	GeneSymbol	source	RNAlength	chrom	strand	txStart	txEnd	Xhyb	probeSeq
ASHG19A3A000094	2003.8	2817.15	10.877	11.5434	noncoding	ENST00000412736	MEG3	Ensembl	1670	chr14	+	101292454	101327308		TGACTTGAGTAAGAACACGAATTATGCATTACCACTCCCCTGCCCCAGGAGCCACTCCCA
ASHG19A3L0000965	76.9819	97.0161	6.18645	6.67159	noncoding	BQ027881	lincRNA-LIPG-1	lincRNA	485	chr18	-	47143727	47144197		AAAGAGAGAACAGAGTTTTATCAGGATCTCTGCTCTACCCACCAAGACTCAAAACCAGGC
ASHG19A3L0003581	631.84	736.811	9.2065	9.61473	noncoding	chr13:40809650-40814850+	lincRNA-FOXO1-1	lincRNA	5201	chr13	+	40809650	40814850		GTTCACAAGTCATAACATCAGAATCCAACTCAGACCTCCTCATTCCATGCTTTCTAATTT
ASHG19A3A044660	176.83	245.956	7.38192	8.02533	noncoding	uc001lkl.2	CR592586	UCSC_knowngene	870	chr10	+	131910185	131919004		TGTGGCCCAATTCCAGTTCTCCAGGGTGCTCATCACTCTGTGGCAGTTTGTCTTCTGGTT
ASHG19A3L0003241	433.614	318.465	8.66878	8.40415	noncoding	BI763082	lincRNA-TBC1D22A	lincRNA	830	chr22	+	47154429	47287216		TTACCTTCCCCGCCAATGTAGACCGGAGACCAGCCACTCTCCAGAGAAACCACAAATGAA
ASHG19A3A038476	2501.09	3729.74	11.1975	11.9454	noncoding	ENST00000452496	ASS1P12	Ensembl	1227	chr9	+	32945993	32947220	NM_054012,NM_000050,	TTGAAATTTGCTGAGCTGGTGTATACCGGTTTCTGGCATAGCCCTGAGTGTGAATTTGTC
ASHG19A3A042659	286.913	79.5306	8.07999	6.39102	noncoding	ENST00000431395	RP11-124O11.2	Ensembl	500	chr10	-	43474464	43476955		CCCAGGTAGGAACTGCAGCTATTTTTAAACTGAGATTTCCTACAAATTAAAATTGCTTTG
ASHG19A3L0000403	122.218	126.099	6.85543	7.06264	noncoding	AI376773	lincRNA-P2RY2	lincRNA	495	chr11	+	72876689	72877184		AGTCTTGTTCAGGGTCAGGGTGATGGCCTTTCCTATGCTAGATCACAGCCTTATATATCA
ASHG19A3L0003536	187.89	305.29	7.46851	8.34678	noncoding	BE244504	lincRNA-FAM110A	lincRNA	447	chr20	-	837118	837565		GTGCTGTGTGTGTGGAAACCCAAATATGACCGTAGAGGGTGGAGCCACAAAACCAAGCTG
ASHG19A3A029630	93.158	103.668	6.46717	6.77322	noncoding	ENST00000458236	DAQB-335A13.8	Ensembl	2835	chr6	-	29702804	29716770		GGTTTAAAAGAAAATGCCCATTGACTAATGAATGAATAAACAACATGTAGTGTATTTCTA
ASHG19A3A032073	211.734	246.834	7.6449	8.03136	noncoding	AY927639		RNAdb	1483	chr6	+	132319845	132321331		ATCTTTCTTTAGCTGAAAAAAGCTGACCTAAACTCCATAACCACTCCCAAGAGCTTGAGG
ASHG19A3L0000032	4671.33	3523.76	12.1159	11.8588	noncoding	DB327252	lincRNA-PBX1-3	lincRNA	544	chr1	-	165092806	165093350		TGATTTTATGCTTTGAACATAAGGCTGGGTCCTTCAGCTCTCCTTCCCCTCTCAGAAACA
ASHG19A3L0000152	1025.35	815.99	9.91854	9.76189	noncoding	exon99-	lincRNA-C1orf83	lincRNA	715	chr1	-	54587441	54588155		TTTGCATATGTGCCTGTGGATCTAATGTTACCCCCCACACCTCACGCGAGACTGTCTCCC
ASHG19A3L0002491	73.3342	84.016	6.11666	6.46703	noncoding	AK124439	lincRNA-SLC4A1AP	lincRNA	1883	chr2	-	27929629	27938599		AAGGTGACTCTAAGGTCCTATCTAGCCTTTTGATACAACATGGCTGGCTCATTTCCCCAA
ASHG19A3L0000697	107.648	98.9191	6.67929	6.70136	noncoding	AA757150	lincRNA-MBNL2-2	lincRNA	508	chr13	+	97787992	97788497		ATCTCATTCTTTCGAGAGCTATATCCTATAGAACCTGCCCCAAATGAAGGAGATCAGCCT
ASHG19A3A050802	2946.41	1861.49	11.4317	10.9535	noncoding	ENST00000433591	RP11-423O2.2	Ensembl	593	chr1	-	142790582	142791175	ENST00000514812,ENST00000509488,	AAGCCGCTGCCTGATATCAACACTTTGTAGATGTAGTATGACTATTCTTGTATGTTTCTA
ASHG19A3L0003482	162.918	167.425	7.26549	7.47212	noncoding	chr2:177245637-177252100-	lincRNA-MTX2-4	lincRNA	6464	chr2	-	177245637	177252100		AGGAAATCAAAGAGCAACAGTGAGGAGTCTAGTCCTGCCTGGTATATCACATACCACAGT
ASHG19A3A018856	288.524	336.85	8.08832	8.48447	noncoding	ENST00000457669	AP000696.2	Ensembl	1133	chr21	-	38004978	38009331		ATGGGTTTATCTTTTGGGACCAAGACATTGGGTCCCTACATGTTTTCCCCTACCCTTCTT
ASHG19A3A018495	746.101	892.673	9.4524	9.88614	noncoding	uc002xyu.1	CR612603	UCSC_knowngene	2570	chr20	+	56285238	56287808		AGTTAATTCAGTGGCTTAAAGAAACCAAACCTACCCACAACGCTTGACCTCCCATTGATC
ASHG19A3L0000532	184.954	179.968	7.44807	7.57594	noncoding	AI910857	lincRNA-GLIPR1L2	lincRNA	485	chr12	-	75841852	75842332		TGTGTCTGGAACGTTTTGCTATCCACCTGCTCTCTGTAGCCATGTTTTGGCTTCAGTTAT
ASHG19A3A045027	64.1831	91.6152	5.92447	6.58829	noncoding	uc009yjc.1	EF565102	UCSC_knowngene	403	chr11	-	27645540	27656128		AATGACGGGAGTGTGAGATCCACCACATGGCGAGGCACCCCAGGAACCTGTTTTCTTCTT
ASHG19A3A014240	938.165	1118.46	9.78364	10.2147	noncoding	ENST00000435407	AC024704.2	Ensembl	416	chr2	-	114586966	114588696		TGAATCACTCCCCCACTGAGGAAGAAACCATCTGTGGAAAAGACTGTATAAGGTACTTCC
ASHG19A3A051572	1808.36	1334.66	10.7359	10.4688	noncoding	NR_027046	LOC145474	RefSeq_NR	1859	chr14	+	71954577	71956418		ATATATTCTTCAGTGTGATTTAGGTGAGTCAGGAATTTTTCCTCTGGAGACTGCCTAAAT
ASHG19A3A032777	11673	12078.1	13.4369	13.6274	noncoding	ENST00000455449	AC073115.5	Ensembl	532	chr7	-	46037138	46037670		TCACTTCCTAGATGAGGAAGTTAAACTCATCAAGAAGATGGGTGACCACCTGACCAACCT
ASHG19A3L0000808	1016.27	1356.98	9.9059	10.4934	noncoding	AK226132	lincRNA-ZFP106	lincRNA	5684	chr15	-	42707320	42783303	NM_022473,	TTTTCCAGGAAAGGCTCCAGTGGTTCTTACTTGATCCAAAAAATGTCAAGAATTAATCTA
ASHG19A3A033174	160.194	182.582	7.24372	7.5965	noncoding	ENST00000424151	AC006378.3	Ensembl	314	chr7	-	93594721	93597702		GGGTACAAACTGTATTTCCAACACTTCTAGCCCTATATATACCTGTCAATGATATTATAC
ASHG19A3L0003312	169.688	200.842	7.32197	7.73522	noncoding	BE796744	lincRNA-ZPLD1-1	lincRNA	961	chr3	-	104348945	104626311		TTTTTTAGCGACAGAAAATCTCACCCTATATCCAATGGGGGTTCACCACCATGATGGCGT
ASHG19A3A043572	554.234	529.709	9.01734	9.14576	noncoding	ENST00000417112	RP11-554I8.2	Ensembl	917	chr10	+	6779343	6780988		TGACTTTTGGAAATCTGATTGACTGGCACACTCTCTCTGCCTCTTTCTTTCTCAACATTT
ASHG19A3A049421	555.521	167.802	9.02048	7.47532	noncoding	ENST00000454681	RP11-141M1.3	Ensembl	844	chr13	-	33929342	34250905		TAAAAATGTAATGGAATTGCAGAGTTGTTGGCATTCAGATGTGTAGGTGGTGGGTGGCAA
ASHG19A3L0002300	261.197	271.681	7.94487	8.17217	noncoding	BG925695	lincRNA-CASK-2	lincRNA	461	chrX	-	43134151	43134491		TCATGGTTCTTCAGTGTCAAATGACTTTCCCCTCATTTCTGGAATCCATACGTAGGCATA
ASHG19A3L0000103	983.367	1178.49	9.85618	10.2897	noncoding	BF511988	lincRNA-TOMM20-1	lincRNA	521	chr1	+	235062091	235062598		ATTTACTTGAAAGAGACCTCATGCCAAAAAATGCATAGCATCATCCCCCACCTGCTCAGT
ASHG19A3A034077	195.247	170.097	7.52501	7.49368	noncoding	NR_015364	LOC441204	RefSeq_NR	1649	chr7	+	26443106	26535982		ACTCTGAATCCAGTGCTCTTTCTACTTCACCATAGACACATGCCCCTTGAGTATAAGGGA
ASHG19A3L0000181	179.36	204.817	7.4019	7.76345	noncoding	AK309032	lincRNA-LMO4-3	lincRNA	1152	chr1	+	87678351	87717014		GTTTCTCTTTTCTCTCTGAGAATGTTAGACCTCTGATCTAATTCTCCACTGCTTCCTGCT
ASHG19A3L0000859	52.8939	65.1071	5.63935	6.10458	noncoding	BU632228	lincRNA-ERCC4	lincRNA	582	chr16	+	13453085	13453940		AGTTTATGGGTCACTTCTTTTTTCTAGCAGATGCGGTTGGTGCCAGTGTCACTTTCCTTG
ASHG19A3A045566	155.517	179.1	7.19855	7.57061	noncoding	AK129753		misc_RNA	2007	chr11	-	86620031	86622038		TGTCCTCTTTTTACTGAAATAGGGGCCCTTGTTGATGGTAGTCACTGCCCATGCTGTTTA
ASHG19A3A031817	731.643	782.038	9.42251	9.70092	noncoding	ENST00000403367	RP1-72A23.1	Ensembl	482	chr6	+	89769346	89769828	NM_007077,NM_001128126,	TTCGTTGTGGTTGGAGTTAATGACACTGAGAACAAGATGGCTATTTATGAATTCATTCAT
ASHG19A3A029430	295.104	246.513	8.11981	8.02898	noncoding	ENST00000455973	RP11-359N11.1	Ensembl	470	chr6	-	14230005	14231801		TAGGCTCTGCAAATTTCATCCCCACCTTTGGCCCTTCAGGCCTAGGGCAAGTCACAGCTC
ASHG19A3A010912	11495.2	12256	13.4161	13.6535	noncoding	NR_027064	PLAC2	RefSeq_NR	3693	chr19	-	5558179	5568005		CAGCTTGGAACTAGATACAGAAATGCTGTTTTGAGAGTGTACTGAATAAAAGATTACATG
ASHG19A3L0000199	82.2675	93.7976	6.28461	6.6242	noncoding	BX501243	lincRNA-HABP2-1	lincRNA	591	chr10	+	115148152	115149054		CTTTCTTTTTTGACAATTATCTTATTGTCTTTGTGAAGCGATTCGTGCCTCCTGTGAACA
ASHG19A3L0002225	4990.64	9967.34	12.204	13.3566	noncoding	BC036853	lincRNA-PDCD1LG2-2	lincRNA	1660	chr9	-	5357968	5630071	NM_018465,	GGAGGTGCTCTAAATAACTTTTAGATTTCCTCTCTCTGTGTGCATTACCAATATCTAAGT
ASHG19A3A044659	3448.12	2869.47	11.6781	11.5695	noncoding	ENST00000417351	CTAGE7	Ensembl	2823	chr10	+	131904272	131907095		CTGGCAATATTTTTGCTCTCTTCAAAAGTAATTCTGACTGATCTCATTTCAAGTAACTGC
ASHG19A3A026163	394.449	217.556	8.53333	7.85152	noncoding	BC034819		NRED	2882	chr4	+	153457444	153460292	uc003imv.2,	GTGGCTTTTACTGTCAAAGATTGTGTAAGCTAAATTATCTGGCAAAATTTTGCTTTCCAG
ASHG19A3A041539	225.833	382.155	7.73423	8.66973	noncoding	ENST00000441399	RP5-842K24.2	Ensembl	3474	chrX	+	131352534	131566890		TATTCTCCTTGCTGGTATTTCTTCCACTTGCTATTTTGCTGAGAGATGCATGCAAACTAC
ASHG19A3L0002292	119.946	242.879	6.82708	8.00627	noncoding	chrX:38863681-38944131-	lincRNA-MID1IP1-2	lincRNA	80451	chrX	-	38863681	38944131		TTAATTAGGTGCCTAACCTTGATTGCAGGGAGTCAGGATATCTCTCCAACTCCACCTTCT
ASHG19A3A008475	2776	1526.22	11.3516	10.6568	noncoding	uc010wkl.1	DQ589083	UCSC_knowngene	1661	chr17	-	45126240	45127901	NR_027418,BC065911,	AACTCTGCTTAGGATTATTTCATTGATCCCCAGGGTCCAATTGCCCAGTGCTCAGTCAAA
ASHG19A3L0000752	347.933	385.042	8.35029	8.68104	noncoding	chr14:66457497-66472547+	lincRNA-GPHN-4	lincRNA	15051	chr14	+	66457497	66472547		GTAGAAAAGATTTGCTCATCCCAAGTCAAGATGTTCTCCCATGTTTTTTCTTAGCAGCTT
ASHG19A3L0000937	1861.69	2167.77	10.7734	11.1741	noncoding	exon1959+	lincRNA-RBBP8-2	lincRNA	93	chr18	+	20043793	20043885		AAGATGTCAAGGACACACACCAAGCCCATCTTGTTCAAAACCTAATGAGCTCCCCTCCCT
ASHG19A3A014203	969.562	1053.86	9.83284	10.123	noncoding	NR_015395	LOC541471	RefSeq_NR	809	chr2	-	112124590	112252692		TTATAAATCTTCAATACATCCTGTCCCCCTAAAACGGCATCTGGGTCTTTTGAGGGTTAA
ASHG19A3L0002896	127.386	154.402	6.91353	7.35467	noncoding	chr2:105731762-105737443+	lincRNA-GPR45	lincRNA	5682	chr2	+	105731762	105737443		GGACAAACTTGTTTATTTGTTGACTCAATCATTCACACATTCTCCAGCCATTTACTCTTT
ASHG19A3A000365	58.3263	68.9485	5.78222	6.18748	noncoding	ENST00000456100	AL163953.3	Ensembl	562	chr14	+	53684429	54153976		AGCATGTTGTCACCTCTCAATACATAAAACTACTGGAGGGTGGTTCCAAGATGGCCAAAT
ASHG19A3A027720	214.684	375.169	7.66348	8.64296	noncoding	ENST00000515403	RP11-844P9.2	Ensembl	3632	chr5	-	175570087	175612158	uc003mdn.2,	CCTGCCTGTTATGAGGGACAGGTAGGAGAGGATGGGCTTTCCATCAAAACAAACAAAAAA
ASHG19A3A043608	478.115	390.265	8.8078	8.70067	noncoding	AK126099		misc_RNA	2985	chr10	+	11437806	11440791		GATCCAGCTCTGCTTCATTAATCTTTCCCTTCTAGAAATGCTTCCTCATGCACTACTTTT
ASHG19A3A000510	138.54	129.964	7.02987	7.10576	noncoding	ENST00000514568	AC092279.2	Ensembl	842	chr19	-	24224401	24225364		ctccacgtcctcaccagagcagctagatacagtgtggattggtgcactcacaaaccttga
ASHG19A3A038303	111.024	119.339	6.72069	6.98069	noncoding	ENST00000445631	RP11-91N2.3	Ensembl	206	chr9	+	2541096	2541635		CTCTGAAAGAATCCAGTTATGGGAACACAAATTACCTCATCCTCAGTTTCACTTTAAAAT
ASHG19A3A036131	104.95	141.994	6.64179	7.2297	noncoding	uc003ysg.2	BC042052	UCSC_knowngene	3296	chr8	-	128698589	128746210		AAGAGATGGTGAAAATTAACCTATCACCACTGCTAATGAACATCACCCTATGGAGAACCG
ASHG19A3L0001531	1168.16	1170.42	10.108	10.2815	noncoding	DN920247	lincRNA-SCARB2	lincRNA	527	chr4	-	77102106	77155656	NM_005506,	GCCTATGTTTTTGAACAAGACCAATCTGTTGGAGACCCTAAAATTGACTTAAATAGAACA
ASHG19A3A039633	26167.3	19392.9	14.6119	14.3214	noncoding	ENST00000399997	RP11-431J24.4	Ensembl	855	chrX	-	16216550	16217414		ATCTGCTATGTGTTGCAGAAAGGCCATGTACAAGCGGAAGTACTCAGCTGCTAAATCCAA
ASHG19A3L0001694	128.291	105.618	6.92446	6.79967	noncoding	chr5:82684694-82704544+	lincRNA-VCAN	lincRNA	19851	chr5	+	82684694	82704544		TGATTTGACTAAATCAATTGTGATCATTCCATTTTCCCTGTCACTATTGTCTGAGGAAGT
ASHG19A3L0002146	202.753	224.73	7.58003	7.89432	noncoding	DB239440	lincRNA-SLC7A13	lincRNA	578	chr8	-	87229854	87333375	NM_138817,	GGCCAGCTGCCTTTGCTATTTAATACACTTAATAGTCACTCTTCTCCATTTACAGCTGTG
ASHG19A3L0000558	1052.59	1047.62	9.95761	10.1145	noncoding	AI014992	lincRNA-KLRB1	lincRNA	458	chr12	+	9486815	9488187		TATAAACACTTCCTCCCAGATTCTGAGCAGGATGACAGATCCCAGGACCAACTCTAAAGT
ASHG19A3A018723	69.814	72.1022	6.04698	6.25112	noncoding	ENST00000433310	AF131217.1	Ensembl	900	chr21	-	29816869	30047170		TTGTGGAGTAAGTGAGTGGGCCTGAGTTGAGAAGATCCTGGCCTTGGATTTTAAAACTGT
ASHG19A3A051854	926.311	1014.13	9.76583	10.0713	noncoding	NR_024396	MGC23270	RefSeq_NR	2518	chr14	+	105287537	105290055		AGCATTTTCATGGATTACAAATGTCTTAGCCCCTGCCCTTTCAAGCAGTTCCTTAGCTCC
ASHG19A3L0001450	145.221	203.205	7.09705	7.75205	noncoding	chr4:114709776-114720551-	lincRNA-CAMK2D	lincRNA	10776	chr4	-	114709776	114720551		CTCTTGTCTGTCTCTGAATTCACCCTCATATTAATCAGAATCACTTTATTCCTAGAGTAT
ASHG19A3A030636	149.707	154.603	7.14476	7.35625	noncoding	ENST00000454588	RP1-45I4.3	Ensembl	552	chr6	-	143360561	143363461		GGTCCAAGTCAATCATCTTTGCTTCTCTCACATTGTCATCGACATTTACCCCAGCATTAT
ASHG19A3L0003378	116.085	97.8986	6.78224	6.68541	noncoding	BF116112	lincRNA-C5orf53-1	lincRNA	588	chr5	-	139527790	139528378		AATGTCTGTGTCCCCTATAAACCATGACTCTACACGGTGGCATTCTAAGGATGGCAGAAT
ASHG19A3L0001775	108.723	90.546	6.69209	6.56946	noncoding	chr6:23664596-23678671+	lincRNA-NRSN1-2	lincRNA	14076	chr6	+	23664596	23678671		TCCTATGCTAAATGTCTTCCTTCACATGTGCTAACATTCTGTATTCATTGCAGGATATCA
ASHG19A3L0001145	209.093	199.315	7.62508	7.72288	noncoding	AI760638	lincRNA-PTH2R-1	lincRNA	500	chr2	-	209407667	209689050		GCAATTCTCTTGTCCTTCTCATGGTGTCAAGCTGGCTGTAGCAGGTATCTTATCCATACA
ASHG19A3L0001046	137.77	159.703	7.02231	7.40445	noncoding	exon2235-	lincRNA-INHBB-4	lincRNA	102	chr2	-	121155131	121155232		GTCCGTTTCCCTGCTCTTCACCAAGGGCTGGCCTAGGTCAGGCACCGAGCTGGGAGCTGG
ASHG19A3A027345	3766.83	1824.43	11.8046	10.9265	noncoding	NR_015360	FLJ33630	RefSeq_NR	2977	chr5	-	127357245	127418766		GAGCCAATACACTGAGGTCACTGGATAAATAAACAGATTCTTGCAAGTGCTTTGGAAATG
ASHG19A3L0000384	199.198	207.845	7.55148	7.78514	noncoding	chr11:44557524-44573924-	lincRNA-ALX4	lincRNA	16401	chr11	-	44557524	44573924		GTATAAGCACCCAGCACCTTACATACATATTGCTAGATCCTTTCTTTTCTCTCTCTATCT
ASHG19A3A032328	140.67	115.203	7.05242	6.92705	noncoding	ENST00000455390	RP11-514O12.2	Ensembl	627	chr6	+	167317185	167318323		TTGCGGTTTCTTCCTTGCTCCTTGCAGGTTATATTTGAAATGAATGTCAGAGCCATGCGG
ASHG19A3L0002833	8304.68	9737.73	12.9444	13.3202	noncoding	chrX:118607438-118617354+	lincRNA-CXorf56-3	lincRNA	9917	chrX	+	118607438	118617354		ATGGGACAAATCTTGGCTCAACAATATCATACTTTGCATTTCTCCCCCGAGTCACACACG
ASHG19A3A039998	465.273	642.826	8.76715	9.42122	noncoding	ENST00000426799	RP11-314A15.2	Ensembl	995	chrX	-	65041096	65042091	NM_152523,NM_001142300,	CTTCGCTCCTTAGCAGATGACAATAACCTGAATTTTCTATTTGCTCCTCTTAGCAAAAAA
ASHG19A3A023200	219.566	392.355	7.69589	8.70768	noncoding	ENST00000419531	RP4-794H19.2	Ensembl	2273	chr1	+	59250831	59366668		CCAATTCTGATCACTGCTCTTATGGTTTGTAATACATTATTTTGGGTTTGGATGATCCTG
ASHG19A3L0000665	56.8583	68.5444	5.74481	6.1786	noncoding	chr13:69265749-69290074+	lincRNA-KLHL1-1	lincRNA	24326	chr13	+	69265749	69290074		AACCATAATGGACTATTATCAGGCATTGATATTTGATTCAGCTTGTCCTGCTGGCTTAGG
ASHG19A3A030634	654.942	524.221	9.26191	9.12918	noncoding	ENST00000446115	RP11-439L18.3	Ensembl	783	chr6	-	143288169	143343090		GCAGCAACATCAGAAAGCCCCTCTGCTGTGCTTCAGGATCACTCTTATCACTGCATAAAG
ASHG19A3L0001674	228.7	205.497	7.75205	7.76873	noncoding	chr5:67675269-67719019-	lincRNA-PIK3R1-3	lincRNA	43751	chr5	-	67675269	67719019		AACCTTCCTCCTGGTTGAAGTTAAATGGTGCTTTAGACTCAAGAAGATCTGGGTTTGAAC
ASHG19A3A046506	193.377	177.245	7.51142	7.55642	noncoding	AF083120		misc_RNA	158	chr11	+	62321164	62321291		TACCAAGCTACCCTTACCAAGCTACGGGTGCAGGAAGCCTTTAGATGCCTCGCTCTCCCT
ASHG19A3L0000058	137.289	137.353	7.01765	7.1833	noncoding	Y00062	lincRNA-ATP6V1G3-2	lincRNA	4597	chr1	+	198284952	198726330	NM_080922,NM_080921,NM_002838,	GCTGTCTTTACATGGGGTTTTCAATTTTGCATGCTCGATTATTCCCTGTACAATATTTAA
ASHG19A3A039081	191.31	170.549	7.49583	7.49823	noncoding	ENST00000435485	RP11-308N19.1	Ensembl	1686	chr9	+	109040672	109367076		TGTGTCTTAAGCTGGGTCATTGAAGTGGAATGTTTTCACAAGACCTCCTCCACTTGCTAC
ASHG19A3A009370	914.467	884.56	9.74908	9.87252	noncoding	AF086167		misc_RNA	550	chr1	-	200295521	200296221		ATGATTACTGGACTTCTGTGCTGCCCAGTTCCACCACACCCCTACTGTGCCTTTCCTTTT
ASHG19A3A030189	59.8276	103.718	5.81947	6.77381	noncoding	ENST00000415381	RP11-301M17.1	Ensembl	517	chr1	+	147718439	147718956		TGTGACCAGCGCGACTCACCGCTCTAATCGCTCCGATTTTCCAAGGCCTTGCTCAGTAGT
ASHG19A3A049789	262.743	291.121	7.95457	8.27111	noncoding	AK125572		RNAdb	3355	chr13	-	100504863	100609401		ATGACAATGTGTCTGGCAAGTTCTTCCCCTGTGTGACTTGCTCATATTTCAAATAGTGGA
ASHG19A3L0002211	145.4	89.0269	7.09975	6.54665	noncoding	AL832443	lincRNA-BNC2-2	lincRNA	2382	chr9	+	15874538	16061659		GGAAAGAATGCATTCACAGAAAGCCAAGGAATGATAACACTAATGCTAATACAATACTAC
ASHG19A3L0000845	58.0858	144.62	5.77568	7.25798	noncoding	BF850330	lincRNA-MESDC2	lincRNA	177	chr15	+	81260381	81260482		ATAAATTTCCATGTACCAGCAAGCAGCATGGTCATATTGCAGTCTCCTGCTAGACCGCTT
ASHG19A3A052798	1215.88	1125.18	10.164	10.2241	noncoding	uc001znn.1	LOC729082	UCSC_knowngene	1379	chr15	+	41576200	41601901		CTGCATTTCCCCTCCATTCTTGAAGCCAATCTTTTTCAAGAAATGACTAAGCAGCACCTG
ASHG19A3L0001037	330.214	553.532	8.28055	9.20927	noncoding	chr2:113359154-113374304-	lincRNA-CHCHD5-1	lincRNA	15151	chr2	-	113359154	113374304		TGGTTATACAGTCAAATAATACTCTAGGCAATATCCCCCATGGGATGGTGTTCTCCCCAG
ASHG19A3L0002962	349.438	282.561	8.3574	8.22938	noncoding	AA769057	lincRNA-UBE2G1	lincRNA	456	chr17	-	4298328	4298629		TTAAAGTGCTTAGAATGGGGGTTCTTGCTGCCCCTGAGAGATATCTTCATTTGGGATTGG
ASHG19A3A015206	117422	123751	16.8644	16.8974	noncoding	ENST00000436229	RP11-185B14.1	Ensembl	259	chr1	+	8891172	8891431	ENST00000471227,	GCATATGTTCGACTGGCTCCTGATTATGATGCTTTGAATGTTGCCGACAAAATTGGGATC
ASHG19A3A052698	417.766	349.422	8.60978	8.53894	noncoding	uc001zcp.1	BC043570	UCSC_knowngene	2525	chr15	+	29967193	29971367		ATTACCTGTGCTGTCCCTGCATTCTCAAGCTCCAAATTGTCAACTAAGAAATGGTCACTT
ASHG19A3L0000524	585.965	84.4095	9.09861	6.47391	noncoding	BG898852	lincRNA-RAB3IP	lincRNA	605	chr12	-	70474248	70474753		AGATTTCATTAGGCACACACACACCTACACACATTACAGAAGGAAACTAAAATATTTCAG
ASHG19A3A043894	529.162	279.882	8.95233	8.21612	noncoding	ENST00000399501	RP11-292F22.3	Ensembl	1273	chr10	+	47594378	47595651		TATGTAACACTGGACACTTTGAGGTGGAGATCAATGTCAAGTGGCTCAGTGAGAACCCTT
ASHG19A3L0002796	225.846	252.088	7.7343	8.06183	noncoding	BP232819	lincRNA-EPHB1-1	lincRNA	582	chr3	+	134400866	134670682	NM_004441,	CTCGCTTTTCAGGAATTATGGAGCCTGTATGTCTCTTCTTTTCTGTCCGTGTCTTCTTCA
ASHG19A3A010086	270.519	172.338	7.99756	7.51299	noncoding	NR_027022	LOC127841	RefSeq_NR	1290	chr1	-	204337557	204338847		TTCCTTGCTCACACTGAGATTCTGTGATTCTCCTCTGAGCATTTCCATGGATAATTTTTT
ASHG19A3L0000017	503.926	424.674	8.8804	8.82491	noncoding	CR738423	lincRNA-CTTNBP2NL-1	lincRNA	700	chr1	+	112548412	112550748		ACCCAGGCCTTCAACTCCTAGCTACGGCCCCTTCCTGGAAAAATATCTGTTAGATTAAAA
ASHG19A3L0003537	73.1851	65.1768	6.11388	6.10585	noncoding	CR615581	lincRNA-ANGPT4	lincRNA	1325	chr20	+	825766	838103		AGAGTGAAAATGCTAAGGAGAAAAATGAAGCAGGGAAGGATGGGGAACTAGAGATTTTTT
ASHG19A3A022462	261.458	195.174	7.94679	7.69054	noncoding	ENST00000426017	RP11-191G24.1	Ensembl	362	chr1	+	51984054	52027301		CAGCAGAAGCAGCGTAAAGTATTGGAACTTTGAATCTGACATCAGAAAGACCTGCACTCA
ASHG19A3A022766	736.874	766.07	9.43419	9.67249	noncoding	ENST00000481312	CTD-2230D16.1	Ensembl	1970	chr3	+	64670803	64997143	uc003dml.2,	GATTTGTATATTTTCGCTTTCTCCTCAAGTAACACCTGGACCTGCTCCTTTCCCTTCAAA
ASHG19A3A053272	161.014	150.639	7.25019	7.31994	noncoding	ENST00000423422	RP11-336K24.4	Ensembl	420	chr1	-	155955165	155976861		TGTCATCCATCTGCTGGCCCTTTGGACCACTCGGCCACTGGCATGCTTTCCAAGTCTGTA
ASHG19A3A014896	110217	127611	16.7633	16.9432	noncoding	ENST00000415349	AC125238.4	Ensembl	1299	chr2	-	204629017	204630316	ENST00000402024,	CCAACAGTGGATGGCAAAGTGGTGTCTGAGACCAATGACACCAAAGTTCTGAGACATTAA
ASHG19A3A030476	65.178	94.3249	5.94925	6.63323	noncoding	ENST00000439075	RP11-510H23.1	Ensembl	4507	chr6	-	125230238	125284185	NR_026876,	TGTGTGCATGAAATTCTACAGGCATATGGGGTCGTGATCTGCTAATCTCCAGTTATTATA
ASHG19A3L0001378	432.281	141.722	8.66457	7.22673	noncoding	AJ493605	lincRNA-C3orf35	lincRNA	981	chr3	+	37427759	37459039	NM_178342,	AAGGTGATTGCATGCTGGTGTCTTTAGCTAAAAATAAAGTTAATGTCTTTGGGGCAATCA
ASHG19A3L0001033	113.087	80.0944	6.74656	6.40027	noncoding	chr2:107718693-107737818+	lincRNA-RGPD4-2	lincRNA	19126	chr2	+	107718693	107737818		AATACAATGTTGATTCTGTTACTATGCTTGACATTGCCTTTTCACTACCCAGCTTTTCTA
ASHG19A3A034138	126.784	161.798	6.90705	7.42247	noncoding	G36719		misc_RNA	454	chr7	+	30554993	30555447		AACCTGCTAGATCCCACAGCCAACCTTAATAGTCACTTTTGAAAAGTCCTGGAAATACAA
ASHG19A3A030882	436.463	305.481	8.6772	8.34784	noncoding	uc003mts.1	AK023629	UCSC_knowngene	2287	chr6	+	2246031	2284008		AATTCTCGGGCTGTGCTGGGATGGAGATTAGAGGCCAAATAAAAACCTCTGGTAAGTAGT
ASHG19A3A024075	230.464	249.923	7.76289	8.0493	noncoding	ENST00000515436	RP11-617D20.1	Ensembl	513	chr4	-	38619907	38621217		TTCTGCCAGTTCCTTGCTCCATAACCCCTAGAAAATTACTTCTGTCTGAGCCTTGGGATT
ASHG19A3A022958	188.079	214.968	7.47011	7.83299	noncoding	ENST00000465177	MT-ND1	Ensembl	898	chr3	+	106619914	106620812		TAGTGCTTTGCAGATGACACATCTCTATGCCTGTCCTAATATCTAGTACCCCACCTCGAA
ASHG19A3L0002441	85.4987	89.6329	6.33677	6.55706	noncoding	chr9:26772419-26808763-	lincRNA-TUSC1	lincRNA	36345	chr9	-	26772419	26808763		AGTGATACCTAAATTTAACTCCAAGGCCTGTAAGACACCCATAAGCCATCCATCCATTCA
ASHG19A3A033628	3413.69	1580.79	11.6615	10.7103	noncoding	uc003vwb.1	AK098095	UCSC_knowngene	2750	chr7	-	140419137	140421887		CTGCTCAGGTCCCTTCATTTGTACTTTGGAGTTTTTCTCATGTAAATTTGTATAACAGAA
ASHG19A3L0002914	170.26	145.643	7.32703	7.26912	noncoding	AI859713	lincRNA-NUDT4-2	lincRNA	489	chr12	+	93382371	93382860		CCTGAGATCATATTATTTTCCTTTAAGGATTTGCTTCATCCCAGGTGTTCATCTAATCCT
ASHG19A3L0000836	330.515	292.921	8.28147	8.28139	noncoding	Z41842	lincRNA-RASGRF1-2	lincRNA	336	chr15	-	79413452	79413788		AGTAGGGTCCTCCCCAGCCTTAGAGACCTTTCCAGTCAAGACCACCATGTACAGTGATTC
ASHG19A3A035662	130.596	200.02	6.94917	7.7292	noncoding	ENST00000506121	C8orf75	Ensembl	1301	chr8	-	29578777	29583939	NR_026765,	TTCAGGATTGCAAGATTTCAGCTACTGTCTCTCCTCGGAGCAGGATTCCATCTTTTCCAT
ASHG19A3L0000128	824.386	788.655	9.59921	9.71148	noncoding	chr1:39116163-39128263+	lincRNA-RRAGC-1	lincRNA	12101	chr1	+	39116163	39128263		GGTAAAAAGATGCCTCAAGGAACATCTACCGATCCCCTCTAGAACACTGTTTTGAGAAGG
ASHG19A3L0000765	4889.63	5217.51	12.1811	12.4302	noncoding	AI734132	lincRNA-RGS6-1	lincRNA	438	chr14	-	73058669	73059107		ATTCATCTTTGTCTTGGACATTTTGGATGACTCTCCCCTCCTGGGACTAGAGACAAACTG
ASHG19A3A012638	246.637	219.358	7.86089	7.86236	noncoding	ENST00000317122	RP11-169K16.9	Ensembl	2468	chr1	-	16160973	16174642	NR_024279,	GGGCGTCTTTCACTAATTTTTCCTAGGTTTTCTCTTCTATCGGGCTCTGTGGTCCTTTCA
ASHG19A3L0001135	272.186	208.499	8.00622	7.78915	noncoding	chr2:19979944-19990294-	lincRNA-OSR1-1	lincRNA	10351	chr2	-	19979944	19990294		TCTTGTGTTTGTGATCAGCACTTCCAATCCTCTTTGCCCTGAGTAGTATTTGATTGTAGA
ASHG19A3A041679	599.741	625.144	9.13234	9.37782	noncoding	U66048		NRED	2959	chrX	+	149128983	149131935		AAGAAGTGTACTCACACTGCCCCAACACCAGTGAGTGGAAATATTTATAGGTCTCTCATT
ASHG19A3A020412	62.3902	68.4562	5.88312	6.17713	noncoding	ENST00000428151	RP5-884C9.2	Ensembl	573	chr1	+	38513096	38584697		CAGCCAGCCTTAAGGAGTGGACATCCTGCCTGGTGAAACTGAACAAGACACCTACCGCAT
ASHG19A3A024204	256.692	234.007	7.9215	7.95348	noncoding	CR604878		NRED	1220	chr4	-	56814122	56815341		ATATTAATCCAGGGCTGACACCACTTGAAGATAAGCCCGTTCCTCTCTCTGGTATATTCT
ASHG19A3A023943	120.405	73.6388	6.83275	6.27955	noncoding	ENST00000511169	AC006499.7	Ensembl	607	chr4	-	10168782	10169389		TATACAATCGTGGTGACAACTTTCACCTCAGACTTTGCTGGCCTTGTGGGGATAGAATCA
ASHG19A3A038206	1633.07	1469.12	10.5859	10.6092	noncoding	HIT000086764		H-invDB	724	chr9	-	138999587	139000884		TTTCAAATTGTGCTGTGATAACCCTGGCTGTCTTCCTGCTCCCATAGTGGATAAAAGCGT
ASHG19A3L0002274	302.317	336.447	8.15468	8.48325	noncoding	AW391396	lincRNA-ATP11C-2	lincRNA	766	chrX	-	138516716	139115600		TGCTGTAGTCCACTATAATTTCCAAAATCATTATAGTTCCCACCACCACCATAGTTACCA
ASHG19A3L0002632	103.552	106.916	6.62184	6.81873	noncoding	chr11:79223852-79229652+	lincRNA-FAM181B	lincRNA	5801	chr11	+	79223852	79229652		TAGGTGTTTGTGACTCAGGGAGTGGGTATAAGGTGTCCCTTTCTGGGATGTTTTCTTTTC
ASHG19A3L0000291	1428.99	1552.14	10.392	10.6803	noncoding	AK296262	lincRNA-PTEN-1	lincRNA	1121	chr10	-	89892056	90343015		AGTCTTCATATTTTGAGCCTGTCGTTCCTCTCATATGTCCCACTCCCTTTTCATACTGTA
ASHG19A3A036817	333.055	366.046	8.2914	8.61293	noncoding	uc003ykw.1	CR608006	UCSC_knowngene	2774	chr8	+	103819049	103822203		ATTCTGTGACGTGTACCCAGTATTTATTGGAGGGTATTTCCTAGCAAGAAAATGAGGGCG
ASHG19A3L0000483	111.358	91.4192	6.72487	6.58402	noncoding	BQ447228	lincRNA-ALG10-1	lincRNA	403	chr12	-	38450353	38450755		TTTTACTTTACTTTCTTTCTTCCTTTGTTGAGCTTGAGTAGGGGGTACAGGGGTGAGGGT
ASHG19A3A013635	277.354	449.683	8.03154	8.91032	noncoding	ENST00000418851	AC008280.1	Ensembl	412	chr2	-	54256688	54257819		GAAAAAGAAGGAAGCCAAAGAGAAAGTTACCTGGATTCAACTGAAGCACCAGTCAGCTCC
ASHG19A3L0001330	176.96	146.967	7.38349	7.28248	noncoding	AA420793	lincRNA-RAP2B-1	lincRNA	359	chr3	+	152716537	152716874		CCACCTCTAGCATTTATTTAATGTGACATTTAAATCTTTTGTGCTTCAGTTTCCTGACAC
ASHG19A3L0001866	1014.17	986.325	9.90249	10.0298	noncoding	chr7:1348449-1366599+	lincRNA-MICALL2	lincRNA	18151	chr7	+	1348449	1366599		TTATATTGAAGTATTATTATTATTCGATGTCTGTCCCCACACTCCTAGCCAGCCTCCACC
ASHG19A3A035125	371.4	402.118	8.44694	8.74442	noncoding	ENST00000440744	AC024084.1	Ensembl	457	chr7	+	135710508	135769416		ACATCTCCATTTTCACATAAGCTCCCCAACTCTCAAGAAGACATGTCAAACTTCAAAGAA
ASHG19A3A046467	6025.5	4910.73	12.4767	12.3411	noncoding	ENST00000427762	RP4-592A1.2	Ensembl	690	chr1	-	59096512	59097202	NM_013411,NM_001625,	ATCAGATGATAATGAAAAGGCCTTGAAAATCTGCCGGCAAGCCTACCACACTCAAACCAC
ASHG19A3A031214	170.802	183.247	7.33194	7.60158	noncoding	ENST00000435408	HCG9P5	Ensembl	225	chr6	+	29716065	29716290		AGAGAAGTCGCAGGAAGAATCCTCTGCCCGGAGCCTGCAGACTCCAACCCCTCAGCGTGA
ASHG19A3A034710	194.694	180.741	7.52087	7.58127	noncoding	ENST00000435695	AC002454.1	Ensembl	432	chr7	+	92465796	92546501		ATTAAAACCCCTGAAAGCTGCCACACCGTGAAAACAAGGCCTCCTTCACATTAAAGGCAA
ASHG19A3L0000789	183.578	153.018	7.43781	7.34215	noncoding	chr14:94335247-94345947+	lincRNA-FAM181A	lincRNA	10701	chr14	+	94335247	94345947		TAAGACATATCCCATCTAGTTGCTTGTCCCTATTTCTGTGGTGAGGAAGGTCCTCTATGG
ASHG19A3L0002573	393.454	438.133	8.52943	8.8722	noncoding	DB299428	lincRNA-PAIP2B	lincRNA	543	chr2	-	71534130	71534673		TAAAATACCATTATAATGAGCAGCTGCTATTTTTGCCTTCCCAGCGTTCATCCCCTCTTC
ASHG19A3L0001479	1679.48	2045.16	10.6315	11.0887	noncoding	chr4:25089927-25101952+	lincRNA-SEPSECS-1	lincRNA	12026	chr4	+	25089927	25101952		TTTACTCATGAAAAAGAAAACAGTGAAGGCCCCCTCCTCATGGCTTTCTTCCAACAAACT
ASHG19A3L0000634	1084.67	879.98	9.99809	9.86533	noncoding	CR590107	lincRNA-NUDT15-2	lincRNA	950	chr13	-	48627461	48669198	NM_014166,	GTCCTGTCTAGGGAACTTATAGAAATGCTGGCAATTTCAAGAAACCAAAAGTTGTTACAG
ASHG19A3L0000026	58.5504	67.2088	5.78787	6.14929	noncoding	chr1:157374626-157390451-	lincRNA-ETV3-1	lincRNA	15826	chr1	-	157374626	157390451		TTAAATAGTGTGTATCCTCCAGACAGTCATCTGTGTACCCACAAATACCACAGACCCTGT
ASHG19A3L0001452	428.108	442.866	8.64908	8.88854	noncoding	BG677629	lincRNA-ARSJ-2	lincRNA	928	chr4	-	115399874	115400748		AATATTTAGCCCGTGTGCTTCTCCCGAAAGCCCCATTTGGCTTTCCCTTCTTATCTAATT
ASHG19A3A034250	103.174	80.7427	6.61638	6.41201	noncoding	ENST00000436045	FMO7P	Ensembl	768	chr1	+	166443981	166450802		AAAGATGTGCAGTATGAGGAAGCATCCTGGTTTCTCTTGCACTGGCCAATGGAACATTGT
ASHG19A3A015714	129.14	139.927	6.93386	7.21029	noncoding	ENST00000416845	AC093159.1	Ensembl	424	chr2	+	62690261	62691205		ACAAGAGGTGCCATGAGACAGTATATAGTTCATTTCCCCACCGCAAGAGTAAAGGGCTTA
ASHG19A3L0002160	58.3367	71.3801	5.78236	6.23611	noncoding	EB387271	lincRNA-TMEM64-1	lincRNA	847	chr8	+	91317897	91318744		CTTTCCCAAGTCTTCTCCATGTAATGTAAATTGCATTCCACTGAATTTAGCCTAAAAAAC
ASHG19A3L0002508	92.7362	196.717	6.46118	7.70281	noncoding	CN413083	lincRNA-UFC1	lincRNA	687	chr1	+	161106389	161107075		TTTTGTAAAACCTCCCAGGATGATAGTAAGAGTTGGCACAAAAAGAGGTTAATAGGTGCT
ASHG19A3L0000387	256.891	215.005	7.92277	7.83317	noncoding	chr11:44720724-44741649+	lincRNA-TSPAN18	lincRNA	20926	chr11	+	44720724	44741649		GTTTGCCTTCCCATTTCTTTTCTTTTCATCCAAGTGCAGAGTAGTGGATGGACATAGGGG
ASHG19A3A013540	57261.5	76513.6	15.7859	16.2253	noncoding	ENST00000414823	AC009413.2	Ensembl	399	chr2	-	42077342	42077741		TATGGCACGGAGTCCCAGGCCAAGGATGTCATTGAAGAGTACTTCAAATGCAAGAAATGA
ASHG19A3L0000086	27518.5	29871.7	14.6802	14.9237	noncoding	BI048312	lincRNA-WNT9A	lincRNA	393	chr1	+	227598421	228286740	NM_001658,NM_001024228,NM_001024227,NM_001024226,	CGAAAAAGACAACCTCTACTTTTTTCTTTAGTATTTGGATAAACACTGAAGCTGGAGCTG
ASHG19A3A043149	188.797	185.387	7.47641	7.61801	noncoding	ENST00000451364	RP11-429G19.2	Ensembl	716	chr10	-	97621069	97849912		TTATAATCGGAGTGGATTCCATACCTCTCATCCCTGGATTTTCATCTTGTGGCACTGGAT
ASHG19A3A046486	82948.8	73993.6	16.344	16.1863	noncoding	ENST00000490750	RPLP0P2	Ensembl	961	chr11	+	61404151	61405112	NR_002775,NM_053275,NM_001002,ENST00000413306,	TTCCAGGCTTTAGGTATCATCACTAAAATCTCCAGGGGCGCCATTGAAATCCTGAGTGAT
ASHG19A3L0001912	119.276	131.933	6.81947	7.12644	noncoding	chr7:37833800-37845625-	lincRNA-GPR141-2	lincRNA	11826	chr7	-	37833800	37845625		CACAGTGAAAGTCTAAATATCTTAGAGCTTTTCCTCTGCTACTACAGAATCTTCCTAGAA
ASHG19A3A013578	2393.15	2051.29	11.1351	11.0924	noncoding	ENST00000430650	AC009236.1	Ensembl	721	chr2	-	45419317	45550434		AAACCAATCGTCCCCCCACCTGATTCCAAAGGAATTACAGAAAAATGGAAAGCCAGGAAC
ASHG19A3A032100	96.5115	94.2906	6.52133	6.63227	noncoding	uc003qet.1	AK055166	UCSC_knowngene	2069	chr6	+	134758853	134825719		TAAGTGGTGCTTGCTAGCCCTACTAAGAATCCTGCCATTGTTGCAAATTTCAGAAAAAAG
ASHG19A3L0000857	153.869	143.455	7.18408	7.24422	noncoding	AI201251	lincRNA-LITAF-2	lincRNA	489	chr16	+	11477572	11478925		TCAGCTCATTGCCTGCTTCATTGTCATTGGTGCCCAGAAGGCCAGCGGATATGCCGTGCT
ASHG19A3A040291	1420.02	1722.58	10.384	10.8404	noncoding	ENST00000423016	CTD-2230M5.1	Ensembl	168	chrX	-	113623440	113623608	NM_012470,	AACTTACAGACTTCCACAAGCAAGTCACTAGTGCTGAGGAATGTAACCAAGTTTGCTGGG
ASHG19A3L0003153	66.7232	89.3978	5.98156	6.5532	noncoding	chr8:25437747-25443124-	lincRNA-CDCA2	lincRNA	5378	chr8	-	25437747	25443124		CCTTCTTCTAATCTCCAAGTTAAAAACCTCTAAACCTCTGACTTTTAGACATCAGATTTC
ASHG19A3L0000851	209.333	185.468	7.62667	7.61901	noncoding	BC041387	lincRNA-MCTP2-2	lincRNA	4605	chr15	+	94774954	95023632	NM_018349,NM_001159643,	CACAGTATTTCCCTGCCATGTAAAAATCCTGACTTTGTGCGTATATAAAATGTATGCAAT
ASHG19A3L0003445	245.36	259.084	7.8525	8.09981	noncoding	chr10:95567958-95575624+	lincRNA-TMEM20-2	lincRNA	7667	chr10	+	95567958	95575624		AAGAATTTTGATATCTGAGCTGCTGGATGCATGCGCTTTCTTTCTCTCTCTGATTCCCCC
ASHG19A3L0001756	90.3876	98.2655	6.4222	6.69098	noncoding	DA204380	lincRNA-C6orf118-6	lincRNA	592	chr6	+	164347976	164650818	DA245301,	TTTGAAAGCCTAGTAGACACCCGATGCTTTCAACATGTCTTATATGACCCTTGCCTCCAG
ASHG19A3A007192	226.389	376.851	7.73773	8.65101	noncoding	NR_015442	LOC401397	RefSeq_NR	1055	chr7	-	112756773	112758637		GCCATTCCTGTAATGGCTGCTTCCTAGAAGGTCGTGTCACGTGGAACCTCTTAATCTCAG
ASHG19A3A039070	84.6026	77.776	6.32314	6.36138	noncoding	ENST00000364713	AL591506.1	Ensembl	306	chr9	+	107859036	107859342		TGATGGTTATGTACCATCTCTTGACCATAAAAAGTCCTACTCTCTACATGCTGTATTATT
ASHG19A3L0001472	346.843	302.887	8.34586	8.33468	noncoding	chr4:1774152-1786902-	lincRNA-TACC3	lincRNA	12751	chr4	-	1774152	1786902		TGGTGCCATAAGTGCCCCCTGACAGTAGCCTGAGTTTCCCATGCTTTGAGATGGGGTGGT
ASHG19A3A009938	205.536	239.742	7.59964	7.98658	noncoding	NR_003587	MYO15B	RefSeq_NR	9424	chr17	+	73584138	73622925		ACATTCCTCCAACAGCTGTTGGCTGACCGTCTGCCTCATCTACCCTTGGGCCAGATGCTG
ASHG19A3L0003377	266.299	246.342	7.97533	8.02766	noncoding	chr5:137822391-137830175+	lincRNA-ETF1	lincRNA	7785	chr5	+	137822391	137830175		GGAACCCCAGGCCTCTGCTTGGGTAGGGCTTTTATTCTCTTCTGTGTGCAGGGTCCTTGA
ASHG19A3L0002606	173.221	164.754	7.35204	7.44686	noncoding	H00916	lincRNA-NTF3-1	lincRNA	500	chr12	+	5454390	5454785		ATGTGGGGAATTACTTACCTCTTCTCTGGAAACCTTTCAACCTTTCTCTGGACTTCATCC
ASHG19A3L0000333	1861.88	2002.23	10.7737	11.059	noncoding	DB030353	lincRNA-RPUSD4-2	lincRNA	613	chr11	+	125976772	125977385		CCCCACACTGGAAGTGGTTTGCACACTCCCTCCAACCAGACAAAAAAGAGAGGGTTTCCA
ASHG19A3A013654	8977.73	8275.21	13.0609	13.0865	noncoding	CR609715		misc_RNA	1695	chr1	-	247350699	247352392		GTTTGGAGGAGTAGTTAGTATTTGGCTCATATAATGTGTTAGGTAACTATTCTAAGCCAT
ASHG19A3L0002141	63.3781	67.9438	5.90743	6.16562	noncoding	AW173332	lincRNA-MFHAS1-1	lincRNA	406	chr8	+	8608883	8638945		TCTCCTTTTGCCAGTCCCTGGATAAACCATTCATCAGATACATAGGAAGATAAATCAGAT
ASHG19A3L0000362	201.299	198.947	7.56724	7.71976	noncoding	exon678+	lincRNA-KCNA4-3	lincRNA	279	chr11	+	29337947	29338225		CCAGTGACTTCCTGGCTCCATGATGTTGGCAAACGATTTAATTTTGTACATCCGTTTTTT
ASHG19A3A049664	1234.51	1505.14	10.1843	10.6365	noncoding	ENST00000443621	RP11-30C8.2	Ensembl	282	chr13	-	73987609	74120978		TTGACAACTTGAGAACTGCGTTCAAGGAAAGTCTTTAACAATTCTCCTCCTCACCTCCAC
ASHG19A3A033216	282.047	313.14	8.05513	8.38059	noncoding	uc001fuu.2	AF088076	UCSC_knowngene	423	chr1	+	159931073	159946734	ENST00000423943,	TAAAAGGCCAAACCTTTGCTCCAACTTTCTCCTTAGCTTCCCTTTGGATCTGGAAAGCTG
ASHG19A3L0002286	353.165	289.013	8.3733	8.2619	noncoding	chrX:20419404-20431504+	lincRNA-CNKSR2-2	lincRNA	12101	chrX	+	20419404	20431504		GTAGTGGTCCTTCTAAATTCGGGCCACTCGACTCATTCCTTCCTGTCTCATTTTGTTCTT
ASHG19A3L0000717	881.513	556.82	9.69247	9.21832	noncoding	GD141660	lincRNA-BAZ1A	lincRNA	274	chr14	-	35433120	35438502		CTTTATGGAGTAGAATTGAAAGGAGACTTTTCGCCAATTGCAGGAAATGGTCATAAAAAA
ASHG19A3L0002991	360.362	281.057	8.40415	8.22182	noncoding	DA335567	lincRNA-NT5C1B-RDH14-4	lincRNA	585	chr2	+	18059960	18542882	NM_002252,	TTTGGCCTGTACAACCAGAGAACAGGATTCTTCCCTTCTTTTTGGCCACCAAATGCCTAT
ASHG19A3L0002725	143.427	130.057	7.07894	7.10703	noncoding	chr11:130081529-130089431+	lincRNA-ZBTB44-1	lincRNA	7903	chr11	+	130081529	130089431		GGTGTTTAACTGTAACCTGATTACCAGACTTGCATTCCTGTGGACCCATTTCCAGTAGCT
ASHG19A3L0002155	396.663	357.386	8.54126	8.57361	noncoding	DB530028	lincRNA-MMP16-2	lincRNA	439	chr8	-	90623514	90623953		TGATCATTGTTTGCTTATTCTTATATGGCCCCTGTATTTCAGACTCACTCTGTGTCAGGC
ASHG19A3L0003507	261.601	251.657	7.94797	8.05949	noncoding	CN273898	lincRNA-TMCO5A-2	lincRNA	807	chr15	+	37400695	37401493		AGGATGTGTTTTCATTTCCATAACACTGGAAGCACTTTCTGTAAACCTTTTGATGGACTT
ASHG19A3A007449	832.623	1215.73	9.61289	10.3352	noncoding	NR_026966	LOC100130691	RefSeq_NR	5223	chr2	-	178148235	178257419		CAAACTCCACGCCACCTGGTTTGCTCAACAGCAAAAGACACGGCCGGGTGCGGTGGCTCA
ASHG19A3L0000088	318.192	358.61	8.22637	8.57912	noncoding	CB265955	lincRNA-RAB4A-5	lincRNA	616	chr1	+	228918736	228919347		TCTATTGAGTGGGTGAGGTCTTGCCTCCCTTTCTCGTGCAACTCTTTTAGTGGTTTACAA
ASHG19A3L0001875	532.65	534.617	8.96322	9.15722	noncoding	DB522844	lincRNA-LOC100131199	lincRNA	463	chr7	-	141212709	141228978		TTATGTATCCAGGATCCTTCTACTGTGTTTCTCCTCCATTGCGAAGTCCTTCACTTCCAG
ASHG19A3L0002412	191.842	269.566	7.4997	8.16055	noncoding	DB049930	lincRNA-PDP1-2	lincRNA	551	chr8	-	95003771	95004321		ATAAAGAAAATAAAAGGGACGGATTTCCTGTGTCTTCCCAAGCAGGCCCCGCCTTTTTCT
ASHG19A3A025970	977.809	710.528	9.8456	9.56031	noncoding	ENST00000510011	RP11-33B1.1	Ensembl	979	chr4	+	120375974	120419058	uc003tnf.3,NR_024271,	TACATAACTGAAGACTCCCACCTTCAGGCAGGATTGGGTAGTACGTGTTTGTAACTACCT
ASHG19A3A050297	161.548	139.866	7.25474	7.20959	noncoding	ENST00000419499	RP11-459P23.1	Ensembl	3340	chr13	+	74805593	74834113		AGGTCTGTCCTTTTTAATGCTCACCACACTTGAGGTTTCTGTTCACACTTCAAAGGCTGT
ASHG19A3A040889	138.904	107.14	7.03404	6.8219	noncoding	ENST00000450527	RP11-342D14.1	Ensembl	722	chrX	+	45042495	45193162		TTTCCACAGCTTCCTGCTTTCGTCAGCTTCAGCTTAACATCTATTATTGTGAAGAGTAGG
ASHG19A3A050025	136.516	195.317	7.01062	7.69193	noncoding	ENST00000425638	RP11-173P16.2	Ensembl	1082	chr13	+	31651390	31689836		TTTGAAAAGTCATCTCAGGCCACATATCATACAAGCTGAACACTTCCAGCCCCTCTGATG
ASHG19A3L0000009	874.187	888.649	9.68138	9.88031	noncoding	BX104325	lincRNA-FAM102B-1	lincRNA	451	chr1	+	109073813	109074249		TCTGCTAGGGGATTAGTATAGCATTTTAACATTTGATCTTATTTTCTCCCTTCTGGATCA
ASHG19A3L0002965	212.337	208.806	7.64891	7.79163	noncoding	CA395304	lincRNA-CCL2	lincRNA	601	chr17	+	32550321	32550922		TAGCGGGCATTTGTCTTGTGCATTTCCATTTCTGCCCCTACAAGACAATCTCCATGATCT
ASHG19A3L0000470	1012.09	1102.43	9.89892	10.1924	noncoding	U26161	lincRNA-FKBP4	lincRNA	422	chr12	+	2877503	2877919		AGAGAGAAGCTCACAACAAGGCCACACAGAGAAGACAGCCAGGCCCTCCCTATGTCCTCT
ASHG19A3L0001303	150.755	151.938	7.15485	7.33143	noncoding	chr3:118559485-118571910-	lincRNA-LSAMP-6	lincRNA	12426	chr3	-	118559485	118571910		TCCATCTCTCTTGTTTTATGCTTTGTATTCATTACATGGTTTGGTCCTCTTTTCATCCCA
ASHG19A3A041270	282.29	256.334	8.05682	8.08622	noncoding	ENST00000420303	RP13-213K19.1	Ensembl	941	chrX	+	93574036	93574977		ATTACTATCCAGGAGTTGTTCAGGTGTATTTCAGAGCAGTTCACAGCCATGTTTAGGTGC
ASHG19A3L0000385	338.381	312.941	8.31314	8.37959	noncoding	AI239901	lincRNA-CD82-1	lincRNA	229	chr11	+	44559191	44559355		TGGCCAAGGGAGTGAGGTCCTTGTCCTGTCATCCTAGGCTCCAACGGCTTTCTTTGTCTG
ASHG19A3A037458	359.85	299.835	8.40209	8.3182	noncoding	ENST00000425737	RP11-532L16.1	Ensembl	517	chr1	+	200298288	200298805		ATACCATCAAGAAGAAGCTGACAGGGATCCTGCATGAATTACCAGCAAATGGCTACAGGA
ASHG19A3L0002516	153.364	114.087	7.1791	6.91353	noncoding	CA941849	lincRNA-TSTD1	lincRNA	83	chr1	+	160998099	160998182		GGTTACAAAACCCATCTGTATATCCATTCACGTTGTTTTAATTACTAAGAATTTATTTCA
ASHG19A3A013257	106.575	105.08	6.66365	6.79233	noncoding	ENST00000416534	AC007463.2	Ensembl	734	chr2	-	8026900	8039786		GCTGATCACGTCACTCTACAGCTGTTCTGCCACATTTGAGCACCCACATTAAAGACAAAA
ASHG19A3L0002224	149.507	126.856	7.14277	7.07196	noncoding	AI553950	lincRNA-INSL6	lincRNA	449	chr9	+	5131978	5164252		CTTTTTATCCTTATACTCAGGTAGTGACTGCATTTCCCAACTGGTTACTGCTTCCTTCCA
ASHG19A3L0002616	74.6667	70.2746	6.14355	6.21448	noncoding	AW293169	lincRNA-ZNF507	lincRNA	480	chr19	+	31844049	31844530		AGTTGCAGATTATCTTTGAAAAACAACAGGCTCTGGCCCTGCCAGCCCTAGTAACTTCTA
ASHG19A3L0000547	85.5078	67.3343	6.33696	6.15181	noncoding	BF002418	lincRNA-BTG1-3	lincRNA	457	chr12	+	92500888	92501664		TCAAAGAGAGCCCCAAACAGTGTGATCAAGTGGAAGTAACAGTGCCTGGTCAACATTATA
ASHG19A3A023735	157.69	91.5644	7.22023	6.58757	noncoding	ENST00000440556	RP11-513G11.2	Ensembl	1771	chr3	+	193994470	194005157		TTTCAAACCTTTGATCCATTGATCCATTGGGCAGTCTGGGCTTGCTTGGTTCTTGGTTCA
ASHG19A3A043677	314.87	511.746	8.21179	9.09573	noncoding	AK055754		misc_RNA	1839	chr10	+	20058620	20060458		AGCCCCCACACACTCAGTGCTGTCATAAATAATAGTTATCCTTATGGAAAAACTAACACA
ASHG19A3A040770	68.3889	72.7429	6.0178	6.26365	noncoding	uc001hpe.1	AK124056	UCSC_knowngene	1530	chr1	+	225888305	225939945		TGAAGAGCCTTTCTGCAGTTCTGCATTGAACTCTTCATGTGGCCCCATCTAGTAATGAGT
ASHG19A3L0002098	144.482	157.58	7.08986	7.38385	noncoding	BX106988	lincRNA-XKR4	lincRNA	677	chr8	+	55709128	55754324		AAATGCAGCTTGTTTCATGCCTTTCTCTGATTTATTCACCATCCGCGGTGTTGGTTGGGA
ASHG19A3A010336	85.7313	71.168	6.3404	6.23235	noncoding	BC043263		misc_RNA	2325	chr18	-	53548919	53587427		AAGCTGGATGACTATCTCATTCTCTGATGATGGAGAAGAATACTCACAACCTGCTCCCCA
ASHG19A3A049176	361.481	464.192	8.40835	8.95357	noncoding	BC033539		misc_RNA	2851	chr12	+	124570307	124573135		AATGCTGCTATCATTTTCAATTGCTCTCCCAATAAAACAGGCCCTGGAGCCGAGGTGAAT
ASHG19A3A030483	105.864	104.218	6.65395	6.78013	noncoding	uc003qac.2	BC036196	UCSC_knowngene	2629	chr6	-	126039387	126070336		GTTGTTCAGCTGTATGCTATCTGTCTATTCTTTGTTTTCTGTGTCAATAATGCCATATTG
ASHG19A3A021889	230.33	243.132	7.76221	8.00863	noncoding	ENST00000468910	RP11-12N13.4	Ensembl	766	chr3	-	165878990	165879756		AGCCACCTCCCGATATTGACACTTTGTTGATGTAGCATGACTATTCTTATACGTCTCTGT
ASHG19A3A027249	444.949	293.429	8.70541	8.28459	noncoding	ENST00000507241	CTC-428G20.3	Ensembl	2231	chr5	-	114539712	114541943		ATTTTCATCTTGTCATTTAAGTTTCAGCAATTGAGTACCACACTAGAACACCCACAAATG
ASHG19A3A022111	261.244	325.148	7.94538	8.43632	noncoding	NR_024480	LOC100131551	RefSeq_NR	3021	chr3	-	194018990	194030593		AGATTTCCCATCTCAGCCAATGGCGAGTCCAAAAATCCTTTGTGTCCCCTTTGATTCTTA
ASHG19A3L0003294	204.921	250.47	7.59501	8.05264	noncoding	chr3:122764889-122778226-	lincRNA-SEMA5B-1	lincRNA	13338	chr3	-	122764889	122778226		TTTCCAGGAGTGAGATTGGCCCTTCTTCATTTTTTCAGTTCCTCAACTTCCCAGGATAGG
ASHG19A3L0000909	1470.08	1142.62	10.4366	10.245	noncoding	AB074181	lincRNA-CDRT4	lincRNA	2838	chr17	-	15339337	15466875	NM_173622,	TTTGTGTCCATGGAACGTTTATAGACATGGAGGCAGGCAATAAATTCCTCCAATAATTAA
ASHG19A3L0003172	95.4509	81.6374	6.50521	6.42664	noncoding	chr2:224986097-224992215+	lincRNA-FAM124B-2	lincRNA	6119	chr2	+	224986097	224992215		GCTGCCCAAATCTAACCCTTCTTGTCAGTATTGCCACATCTTGTGATTTGTCAAGACAAG
ASHG19A3A026000	393.104	257.005	8.52779	8.09023	noncoding	ENST00000429329	RP11-662G20.1	Ensembl	489	chr4	+	127484663	127885745	NM_032120,	TGGATTGCTTCATGTGTGCTATGCTCCAGCATTTGAAACAGTTGAAGAAACTAGAAAAAA
ASHG19A3A032178	3069.76	3291.14	11.4982	11.7586	noncoding	ENST00000359838	RP3-337D23.3	Ensembl	453	chr6	+	147480060	147502128		TAACAGTGCTGGACCTAAAAAAGGTGTTGGCCCACGAGTGCCTCTCTCTCCCTGCCTGAG
ASHG19A3A041069	1051.67	1176.57	9.95638	10.2875	noncoding	ENST00000452532	RP13-188A5.1	Ensembl	1007	chrX	+	55934555	56041606		TACACTCTTCTGCCTTCCCTTGAGATAATTAAAATAGACTGTACACCGGCCCTAGTCGGT
ASHG19A3A021214	2458.52	2468.3	11.1718	11.3567	noncoding	ENST00000483942	RP11-129K20.1	Ensembl	1338	chr3	-	63082049	63083387		TTTGTCCTCATCAAGAAGGATGCAGATGAAGCTTCCATGAACAAGGTAGAGCTAGGGTCT
ASHG19A3A027088	1911.79	2119.28	10.8139	11.1397	noncoding	uc003kjh.3	LOC645323	UCSC_knowngene	3406	chr5	-	87960263	87980620	NR_024384,NR_024383,	GAAAGCACTCAATGAAGTCAAATTACTGAAGCTTTTGCCTACATCTTGGTCTTTTATGTA
ASHG19A3A034625	202.759	290.876	7.58008	8.26971	noncoding	ENST00000426835	AC004945.2	Ensembl	738	chr7	+	79082426	79100516		AAATTTTATGCCAGATAAAATATTCACCTTCTCGGACTCCCTGGCACCAGGCATGGCCAT
ASHG19A3L0002404	241.963	195.039	7.83367	7.6893	noncoding	chr1:82115673-82123396-	lincRNA-ELTD1-1	lincRNA	7724	chr1	-	82115673	82123396		GGTGCCATACTTTTATCACCCACAAATAACCCCACAAACTTGGTATAATTGTATAAATTG
ASHG19A3L0001045	763.477	764.033	9.48823	9.66799	noncoding	exon2234-	lincRNA-INHBB-4	lincRNA	451	chr2	-	121153496	121153946		GATTGGTGGCTGTGCTGAGTGACCTGTACACCCTCTCATTGCCTCTCTCCAACAACCCCA
ASHG19A3L0000157	60.2213	75.6822	5.82968	6.32067	noncoding	chr1:54928212-54960380-	lincRNA-SSBP3	lincRNA	32169	chr1	-	54928212	54960380		GACAAACAAGACCAAATATTGTCCTCTTTCCACAGAAAATAAGGCTCCACCAGGGCCTGA
ASHG19A3L0000423	372.395	370.098	8.45106	8.62637	noncoding	AW892975	lincRNA-AMOTL1-1	lincRNA	457	chr11	-	94627686	94628135		CTGGTAGCCCCCTCAATTCCTTGTGGAAAAGATAAAAGATAAAAAACAAGCAAGCAAGAT
ASHG19A3L0002393	506.719	468.192	8.88744	8.96489	noncoding	DB455579	lincRNA-ABCD3	lincRNA	459	chr1	+	94713413	94800136	ENST00000413103,	TTTAATTAGACATTTCTCAGAGAATCCTGCCTCTGCTCTGAAGCCTTTCTGTTCGCTCCG
ASHG19A3A020677	240.411	435.625	7.82296	8.86341	noncoding	uc003brm.2	BC036698	UCSC_knowngene	3252	chr3	-	9391373	9438338		ATGACCACATGTGGGACTATTTCAACTGCCACGAGAAATCCCAGAAGGATTATTGTTTTG
ASHG19A3A028159	138.028	132.381	7.02524	7.13079	noncoding	ENST00000503606	CTD-2201E18.1	Ensembl	469	chr5	+	42972725	42973194		TCATCGGGACCCCCCAAAAAACTATTTTGACTCAAGAAGCCATAATCACTGAAGAGAGGT
ASHG19A3L0003366	1749.23	1803.44	10.6907	10.9068	noncoding	BX111887	lincRNA-ZEB1-5	lincRNA	500	chr10	-	32048015	32049105		TGGCTGCCAGCACTTAATGTGATTTCCCCCCATCTCTGGCAACTGAGAGAATAAAAAACT
ASHG19A3A021254	111.623	95.8914	6.72926	6.65549	noncoding	ENST00000481148	RP11-398A8.3	Ensembl	492	chr3	-	72109991	72291716		TATTGTATCAGCTGAGACTGCAGGGTAGACTGCAAGAAGTGCCTCCTTGCTGATGGACTG
ASHG19A3A009460	74.6834	137.854	6.14395	7.18885	noncoding	AK096059		misc_RNA	2036	chr17	+	37705193	37707229		TTACATGCAAAATGGCATGCAAATGAGGCCTGGTGCCTTTTGGGGTATGAATCGTAGAAC
ASHG19A3L0003163	716.606	740.346	9.39535	9.62351	noncoding	chr2:223964483-223968702-	lincRNA-KCNE4-1	lincRNA	4220	chr2	-	223964483	223968702		GATTTGATGTCATAGCTTAAGCCCAAAGGCAAAAGAAAGTCCCTTCTCCTCATCCTCCAC
ASHG19A3L0002520	250.136	212.498	7.88387	7.81711	noncoding	BF575745	lincRNA-MED13L-5	lincRNA	818	chr12	+	115661844	115662417		TGTAATCTGGTCTTCTGGTGCCAGCCATCCTTGAAGTGACCTTCCTTTTTTGGTCGGTGG
ASHG19A3A052464	647.13	793.422	9.2445	9.72074	noncoding	AK023763		misc_RNA	3568	chr15	-	82044851	82048420		ATGAATTTGAAATAATGTCCCGCACTGGGTTAACTGAACTCTCCTGCCAGCAGAGCTGAT
ASHG19A3L0001808	115.82	116.132	6.77896	6.93936	noncoding	chr6:47389241-47404066-	lincRNA-TNFRSF21-2	lincRNA	14826	chr6	-	47389241	47404066		CAGTCTTGGTTTTATTACTGATTATCTACATAATTTCATTGATCTGTCCCGCTACTCCCC
ASHG19A3L0000490	247.452	212.722	7.86612	7.81856	noncoding	BX096603	lincRNA-CCND2-3	lincRNA	733	chr12	+	3980899	4019676		TGCAGTCTGTGCCTTTCATTGCCTTCCTGGAAAATAATAACTAAACTCTTCCTCAAAAAA
ASHG19A3A025129	1563.09	1418.46	10.5244	10.5554	noncoding	ENST00000397097	ZNF732	Ensembl	1032	chr4	+	212428	248643	NM_001039127,	CCCAGCAGAATGTATATAGAGATGTGATGTTGGAGAACTATAGAAACCTGGTCTCCCTGG
ASHG19A3L0002953	221.637	211.312	7.70907	7.8093	noncoding	DB288399	lincRNA-ZNF672	lincRNA	558	chr1	+	249123012	249123570		CAATGATGAGAAAAAGGACACTATCTCACTTCCCATGTAGGTGATAGTCTATGGTGCTCA
ASHG19A3L0000239	944.722	2424.7	9.79655	11.3301	noncoding	EL585127	lincRNA-ZNF37A-2	lincRNA	805	chr10	-	38779976	39150281		GATCCTATTCAAATCCCTTTACCTCCCATTTAATTTCCATTCCATTTCGGGTTGGTTCCA
ASHG19A3A051299	6143.74	6334.61	12.5018	12.7047	noncoding	uc001wkc.1	AX746599	UCSC_knowngene	2524	chr14	+	23982557	24013485		TGTATCCATATTAGCATATGAACTTCATCAGACAAGCACTCTCCCTCCAACAGAGGGAGA
ASHG19A3L0002079	335.027	343.331	8.30051	8.51341	noncoding	BQ446632	lincRNA-KCNU1-3	lincRNA	496	chr8	-	37541867	37542350		ATTGATGAGGTCAGCACCACTGCTTTCTTCCAGGGGGTGTTTGTTTTTCTCCTTAATCCT
ASHG19A3L0003298	3785.92	3928.24	11.8114	12.013	noncoding	AW269809	lincRNA-KPNA1	lincRNA	382	chr3	-	122233924	122236198		AGCTCCAGTCTTTGCCATGGTCTGCAAACCTCCTTCTTAGCGAGACCCCCTCCCCGACCC
ASHG19A3L0000301	463.452	548.954	8.76119	9.19652	noncoding	chr11:102425615-102440915+	lincRNA-MMP20	lincRNA	15301	chr11	+	102425615	102440915		ATCTACTTAAAATTACAAGCTACCTCCCCAGCTCATGATTCTCAAATGTCTGGGCACTGC
ASHG19A3L0001681	72.1068	121.847	6.09187	7.01112	noncoding	exon2995+	lincRNA-FOXD1-2	lincRNA	180	chr5	+	72715548	72715727		GCGAGCCCCGCCGCGCCGAGCCTCCCGGGCGTCCGCAGGCCTGGCGCACACCGAAGCGGG
ASHG19A3L0003459	138.33	159.274	7.02808	7.40015	noncoding	DB452487	lincRNA-EN1-2	lincRNA	475	chr2	+	119068121	119068596		TTCATATTTTGATTCCTTTGTTTAGACAGTTTCTCTCAGGTTCTCCTGTGTCGGCCCGGG
ASHG19A3A049932	228.123	307.786	7.74893	8.35729	noncoding	uc001uoi.2	AK054845	UCSC_knowngene	2406	chr13	+	22615113	22850657		CCTTCCAAATATATGTATGTTTCTTTTCTGAAGATAGACGTGTGTGTGTTTGTGTGTATC
ASHG19A3L0002558	301.958	353.892	8.15271	8.5578	noncoding	AW450413	lincRNA-NFE2L3-2	lincRNA	431	chr7	+	25895917	25896427		TCTTCTTCAGGAAGAGTAAAGCATGTCTTCTAGTTCTACTTCCTTCCCGGTTAGCCAGCT
ASHG19A3A032043	129.032	128.07	6.93184	7.08634	noncoding	ENST00000444229	RP11-527F13.1	Ensembl	583	chr6	+	126498338	126523385		AAGATAGAATTTTGGACCTGGATCACCTGTAGCCTGCCTAGCAATGAAGACCTCATCAGT
ASHG19A3A021933	83.2334	74.8881	6.30058	6.30607	noncoding	ENST00000449106	RP11-85P9.3	Ensembl	427	chr3	-	171594141	171618530		TTCTCAGGGTCTTGCCGCCTTTCTCAAGCTCAGCCTGTGGAGTAAAGCGCAGGCACATCT
ASHG19A3A033599	146.329	125.242	7.1095	7.05231	noncoding	ENST00000464337	AC008155.2	Ensembl	397	chr7	-	137982832	137983229		TGTGTCCAACTCCAGGTCACCCAGCATGTAATTGGGATGAATTCTAAAACACCATGTGGA
ASHG19A3A040283	6761.51	5145.61	12.6427	12.4092	noncoding	ENST00000430258	RP1-298J18.1	Ensembl	551	chrX	-	110867403	110867954		AAAGAAGATGAAGAAGTTTTCAGGGGAGATTGCCTACTCTGGGTGGGTGTTTGAGAAGTC
ASHG19A3A041340	255.656	210.846	7.91697	7.80525	noncoding	AK091319		misc_RNA	2297	chrX	+	102851535	102853832		TCAAGAAGTAGAATACTGTTAGCAGTCCAGAAATGCCATTGATGTCCCCTTCAGTCATCC
ASHG19A3L0003113	220.542	322.922	7.70214	8.42469	noncoding	BF869762	lincRNA-FLJ37543-1	lincRNA	115	chr5	-	61582993	61583108		TAAGGACCTTGTCCAGCCTCCATTCCTGACACCCTTTCTGAAAGGATATCACTTCTGTTA
ASHG19A3L0000352	476.368	425.121	8.80105	8.82712	noncoding	chr11:2448349-2458849-	lincRNA-TRPM5	lincRNA	10501	chr11	-	2448349	2458849		TCTTGCCTCAGTTTCCTTATCTTTAGCAGGGAGGATCCCCGCTTCCCTGGGCTGTGAAGG
ASHG19A3L0002399	506.616	479.485	8.88716	9.00205	noncoding	chr1:87222750-87234290+	lincRNA-SEP15	lincRNA	11541	chr1	+	87222750	87234290		AACCATATGTGACTTGTGTGCTTCCCCTTTCCAGCTCAGTAATACAAAGAAGAAGCGTTC
ASHG19A3L0000820	554.282	389.829	9.01753	8.6993	noncoding	BC036541	lincRNA-ZNF280D	lincRNA	4811	chr15	-	56945018	57210767		CTACAGATTTTGTGTAGCTGCCTATTTGTAGATTTTAAATTTGGCTGTTACTAAGCCCAT
ASHG19A3A048824	702.603	427.68	9.36808	8.83736	noncoding	ENST00000420836	AC005294.1	Ensembl	1083	chr12	+	68429546	68430635		ACTGTGGAGGAGGCAGATGCATGCATGGCCACACAAGGGGATGGAAGAGTTGTACAACCA
ASHG19A3A036799	110.983	102.48	6.71946	6.75519	noncoding	ENST00000458683	RP11-108M21.1	Ensembl	858	chr1	+	187061973	187329455		AATCAGGAAGTATATCTAAGTCACCTCCAGTAGCCGTAACTCTACCTTGTCCAGTAAAAG
ASHG19A3L0000328	305.002	169.419	8.16614	7.48843	noncoding	BG003184	lincRNA-BLID-2	lincRNA	408	chr11	-	122279949	122280320		ATGTCTTGACTAAACCCACACTTAGTTTGAAAGAAGCTAAGAGTCTGACTCTAGACCAAA
ASHG19A3A022854	235.366	306.277	7.79265	8.3513	noncoding	ENST00000464531	RP11-171G7.1	Ensembl	1192	chr3	+	83986195	83987387		TAGCAAGTCCTCAAAGGTAAATGCACTGGCTGTTACCTCCAGCAACTCCCTTATCCAAAA
ASHG19A3L0003107	143.393	122.162	7.07834	7.01575	noncoding	AA992250	lincRNA-ERBB2IP-2	lincRNA	552	chr5	-	65372703	65415636		ATCATCATCAGGTCTGAAATGGGTTCTGCATACCCCGACACCACCTTATATGCTATATCG
ASHG19A3A041692	85.9862	77.3026	6.34475	6.35238	noncoding	ENST00000454307	XX-FW80269A6.1	Ensembl	482	chrX	+	150684022	150684717		TAGCCAAAAGGGTCTATGGTACATTTTACACACAACAGGGTACCCCTCATGGTGATGAAA
ASHG19A3A033949	1189.7	1015.33	10.1333	10.0735	noncoding	uc003srb.1	CR609701	UCSC_knowngene	3988	chr7	+	7284224	7288212		AAACTAATCTTACTGCTAAGCAGTGTGTTGTACTACATAGTGAATGTTCGTGTTTTGGAA
ASHG19A3A045510	138.442	103.727	7.02894	6.77407	noncoding	ENST00000431943	RP11-191G24.2	Ensembl	946	chr1	-	52027537	52060569		TATTATAACATTAGTGTTCTCAGCCTGGACCTTTGGCAGGTAAAGCCCTCTGAGCTCAGA
ASHG19A3L0001642	572.057	551.616	9.06197	9.20375	noncoding	BU663707	lincRNA-RANBP3L-1	lincRNA	654	chr5	-	36446938	36447567		GAGCTGTATTTCCTGTTTTCACCCACTCCTCTTGTACCATCTTTTCATTAACATGAAACT
ASHG19A3A052467	93.0877	85.1263	6.46637	6.48471	noncoding	AL109681		NRED	1479	chr15	-	82141625	82143084		CTGCAGAACATTGAGACACTAGAAACTGAAAATTGAATTTCGAGCTCAGAAATAAGGGAA
ASHG19A3L0002389	126.27	127.33	6.90079	7.07813	noncoding	chr1:98805012-98815587+	lincRNA-SNX7-2	lincRNA	10576	chr1	+	98805012	98815587		GCACCTCTTTCTTGGTTATGAATTTTTACTTGTCTCATGTCTGTCTTGAAGAAGTGTGAA
ASHG19A3L0001508	62.5612	67.5666	5.88681	6.15749	noncoding	chr4:60340905-60362455+	lincRNA-LPHN3-4	lincRNA	21551	chr4	+	60340905	60362455		TCCCCACCTTATAGATACACAGGGCACATGGTGCTTACTTTTCCTGAAACAATTCATATC
ASHG19A3L0000520	1256.53	1217.38	10.2082	10.3384	noncoding	chr12:62007583-62044158+	lincRNA-FAM19A2-4	lincRNA	36576	chr12	+	62007583	62044158		TACTTTATCTTCCCTCTTTATAAAACAGCCCCATCCCCTGAAGAGCTTGAATGAAAACTC
ASHG19A3L0002754	3207.01	2632.44	11.5636	11.4518	noncoding	AW075897	lincRNA-SIN3A	lincRNA	521	chr15	-	75750735	75751256		TAGTCCTTATCTCCTGGCCTTTCCCTCTCCATACTTTTCACCCAGTGATTCAATTGACTG
ASHG19A3L0002696	83.3625	84.5916	6.30225	6.47752	noncoding	BX106769	lincRNA-HOOK2	lincRNA	739	chr19	-	12889934	12890671		TGTCAATATCTGGGCTGTAGGGGGCCTGCCAGAGTCCTCCATGGTGATGATGCATGGAGT
ASHG19A3A025532	14743.6	15787.6	13.778	14.0138	noncoding	ENST00000508241	RP11-231C18.2	Ensembl	540	chr4	+	55242168	55242919		TGACCCTGCCACATTGTATATTCTTGTTCTCCCCCCATGATGCATTTTATTTCAGTATCC
ASHG19A3L0000699	15249.9	12922.6	13.8227	13.7268	noncoding	CR749802	lincRNA-MBNL2-1	lincRNA	4571	chr13	+	97794089	98046372	NM_207304,NM_144778,	TGTATCAATACTATGTTTTGGTTGTAATATTCAGTTCACCCACCCAATGTACAACCAATG
ASHG19A3A039964	300.53	260.31	8.14642	8.10758	noncoding	NR_027139	SPIN3	RefSeq_NR	1721	chrX	-	57002804	57021988		TATGGTTTCCTTCACCCCACACCAATGTTATGAATGAGACCAGCAGACCAACAGCAAACA
ASHG19A3A010901	93.753	94.942	6.47558	6.64071	noncoding	BC028700		misc_RNA	3838	chr1	-	212681389	212685183		AAGACCTCCTGCTAAACGTGGTGGATTAGCATTCTGCATGTATTTTTTCTCACTTTCTTA
ASHG19A3A040883	202.282	245.064	7.57574	8.01999	noncoding	ENST00000430261	RP4-551E13.2	Ensembl	1569	chrX	+	44325936	44328201		GTGAAGAAATCATAGACTGAGATTGCTAAAAAGGTCCTCATGCCTTCAGCCCACATTGCC
ASHG19A3A022005	1213.62	1366.95	10.1616	10.5048	noncoding	AK095773		misc_RNA	2533	chr3	-	182655947	182658477		ATTCAAATAAGATTCCTACATTGCATACATCTCAAATGTCCTACCCAGTGGATCCCCACA
ASHG19A3L0001715	214.281	270.446	7.66152	8.16567	noncoding	chr6:125843301-125854226+	lincRNA-HEY2-1	lincRNA	10926	chr6	+	125843301	125854226		AATTTATTACTCCAATGGCAGTTATTTCCCTTGACCCTAGGATCACTTCTCTCTGTCTCC
ASHG19A3L0000477	6848.06	5576.48	12.6589	12.5301	noncoding	EC575964	lincRNA-TMTC1	lincRNA	106	chr12	-	30748167	30748215	NM_005095,	ATTCCATCTGTGTTTGTCATTTCTGACTGGAAAACTTCTTACTCCATACCTTGTTCGATA
ASHG19A3A016644	115.397	125.918	6.77285	7.06049	noncoding	ENST00000416154	AC079305.5	Ensembl	562	chr2	+	178042422	178042984		AGAGGAAGAAGTACGACATCCCCAAATACCTGTGCTGTAAGATCAGTTTTGAGCTGATGC
ASHG19A3L0003024	578.884	431.925	9.0798	8.85276	noncoding	DB325375	lincRNA-SIX6	lincRNA	551	chr14	-	61110277	61110827		TCGCATATTCCAGATGTGTTTAATAAGAAATTGCACAATGTGCCTCCTTCCGCCATCCTC
ASHG19A3L0002481	116562	120656	16.8544	16.8582	noncoding	BC050642	lincRNA-ENO1-1	lincRNA	1898	chr1	-	8921062	9288096	NM_001428,	ATTGGCCCAAGTCATTGTTTTTCTCGCCTCACTTTCCACCAAGTGTCTAGAGTCATGTGA
ASHG19A3A033220	104.081	88.2335	6.62873	6.53426	noncoding	ENST00000423943	RP11-48O20.4	Ensembl	1113	chr1	+	159931013	159948851		AAGATGAACAACATGACCGGGAAGATTTCCTAATCTCACCACAGCCTGGCTCTACCTTAA
ASHG19A3A047888	81.4824	75.7761	6.27008	6.32319	noncoding	ENST00000437598	RP5-1027O11.1	Ensembl	787	chr1	-	88365591	88371397		AGAATCTATTGCCCTCTTTACTTCACAGTGCTACAGAGAGGATTACATGAGCCAATATTT
ASHG19A3L0002528	275.047	281.275	8.0206	8.22304	noncoding	chr7:73684091-73687309+	lincRNA-CLIP2	lincRNA	3219	chr7	+	73684091	73687309		AGACACTAGGAATGCCCTGTGGTTTCCTAAACTCTACTCCAGCCTCTGGTACAAACAAAT
ASHG19A3L0000989	141.242	131.325	7.05773	7.12043	noncoding	AW082319	lincRNA-CBLN2-2	lincRNA	470	chr18	+	68297769	68317980		TTTGATGAGTTTTTCTGATCTCTGCAGTCTCTCTGAGATGTCCCTCATGGCCACATGAGT
ASHG19A3A032268	463.172	702.587	8.76062	9.54464	noncoding	ENST00000432358	RP11-732M18.3	Ensembl	424	chr6	+	158703294	158733390		GGGAGAAAAATACATCACTAATGGCCAGTTTTCCATATGGTCTGCACGGGTAAAGAAAGT
ASHG19A3A014880	649.945	247.846	9.25155	8.03757	noncoding	ENST00000405197	AC064836.3	Ensembl	704	chr2	-	203200746	203201450	NM_019013,	CTGTCCCAAGAGCTAGATGAAGCCATTATGGCGGAAGAGAGTGGTGACATCATCTCTCTC
ASHG19A3A032136	757.396	772.18	9.47674	9.6827	noncoding	ENST00000381279	RP11-15H7.2	Ensembl	1580	chr6	+	139981064	139982644		TTGTTTCAGAGGCAATTTAAGGAGCAGTTTCCAGACATCAGCTAAGAATCACGTTCTCCA
ASHG19A3A025130	654.952	425.23	9.26208	8.8277	noncoding	NR_027481	ZNF876P	RefSeq_NR	2621	chr4	+	206388	249771		AATTCATGCTGGAGAGAAACCCCTCATGTGAAGAACGTGTCAGAATCTTTACCTCATCCT
ASHG19A3L0002050	104.958	91.9434	6.64186	6.59367	noncoding	chr8:20578220-20590170+	lincRNA-GFRA2-1	lincRNA	11951	chr8	+	20578220	20590170		GAGCTCAGATTCTCTTCGCCTCCTTTTTCTGAGATTTTCTAGAAGGAGAGGCCACTATTT
ASHG19A3L0002858	408.921	411.223	8.58197	8.77764	noncoding	chrX:68350530-68358250+	lincRNA-PJA1-4	lincRNA	7721	chrX	+	68350530	68358250		AGAGCTCTCTTAGTTCCCAACCATTTTCCTGGAGCCCCCTGAGATAAATTAGTTGTGTCT
ASHG19A3A009982	3255.17	2534.2	11.5878	11.4018	noncoding	NR_027058	C17orf86	RefSeq_NR	2183	chr17	+	75084724	75091067		CTCTGCATGCTTGTCTTTAGAGGAAGGAAATGTATTAATTGCCCAAAGTAATATATTGTG
ASHG19A3A023911	61.8524	80.9523	5.86952	6.41603	noncoding	NR_027441	FLJ36777	RefSeq_NR	2140	chr4	-	7099150	7105103		CAGGTGTCCAGAATTGGTTTATTTCCCATCTTAATTGTAGATTTACAATGTAAATGAGCC
ASHG19A3A031129	1797.18	1721.38	10.7268	10.839	noncoding	uc003nih.2	BC033330	UCSC_knowngene	2883	chr6	+	26569551	26574925		TTCCCCCTTCTCCTTTTAATTGTCATGGTGGTGTCTTTCGACCCTAGCAGAGAATATGTG
ASHG19A3L0000248	79.2955	74.4139	6.23018	6.29612	noncoding	chr10:4578200-4593225+	lincRNA-AKR1E2-1	lincRNA	15026	chr10	+	4578200	4593225		GGCAGTAATTGTTTGCACCAGTTCTCTGTTTGACAGCCTTGTCTCAATTTGATTATTTTG
ASHG19A3A023438	487.576	445.628	8.83417	8.89772	noncoding	ENST00000471719	RP11-6F2.6	Ensembl	791	chr3	+	156807669	156818924		TGTATTGGCTCTTGACAGCTCTTCAGAAGAAAATACCTCCTGCCTGTTCTGTTCAGTCCT
ASHG19A3A028235	7656.33	9574.87	12.823	13.2966	noncoding	ENST00000513734	RP11-155L15.2	Ensembl	295	chr5	+	55677607	55677902		TGCAGAAAATGGAGAAACTAAACCAAGGAGAGTCCAGCCTCTGATGAAGCGGTAGAGAAA
ASHG19A3A023166	70.2057	67.9238	6.05551	6.16503	noncoding	AL713779		misc_RNA	2775	chr3	+	128268891	128271202		ATGTGCACTTTTGTGATGTGGAAGGCAAATGGAAGAGAGACACCATCTCCACGTGACTTT
ASHG19A3L0003391	176.086	176.044	7.3756	7.54678	noncoding	chr5:117728562-117735189+	lincRNA-DTWD2-3	lincRNA	6628	chr5	+	117728562	117735189		TGATTCAGAAGACAAATGGCTATCTGCTCTCTCTTTCAGTTCTATTTCTTTACTGGACCT
ASHG19A3L0000818	88.6491	162.14	6.39274	7.42536	noncoding	chr15:56580983-56592133-	lincRNA-RFX7	lincRNA	11151	chr15	-	56580983	56592133		TCACATTCTGTTACCAATGAGGTGGCAGGGGTGCCTGCTCCCTGGGCACCAATGCCATTA
ASHG19A3A020252	704.753	713.021	9.37369	9.56413	noncoding	ENST00000415709	CRYBB2P1	Ensembl	538	chr22	+	25851678	25855648	NM_000496,	CTGCTGCCCAGGAACCCTCCAGACCTCCCAGAGAGTGAATGAAGTGTGACTTGCAACTTG
ASHG19A3A049878	65.973	84.8188	5.96507	6.48057	noncoding	AK092053		misc_RNA	2347	chr13	-	114629488	114631817		ACACTGCACATGTATAGGTAGGCTCGCTCATGGGCATAACCCTCTAAAACACACCTTTTA
ASHG19A3A035629	185.571	136.176	7.45317	7.17088	noncoding	AK055792		misc_RNA	2006	chr8	-	26304764	26306770		CCCATCTTGGTCACATCTCAGAAGCAAAAAGTGACGTAAAAGACTTGAATAAAGAAATTA
ASHG19A3A041282	80.1074	95.3761	6.24525	6.64756	noncoding	ENST00000427866	ERVWE2	Ensembl	1755	chrX	+	97102260	97104015		TACATTTCATAAGCTCTTCCCAAGATCTCTCTATTAAGCTCCAGATGGCCATCGAAGCCT
ASHG19A3A035937	86.1398	186.387	6.34848	7.62508	noncoding	ENST00000504145	AF117829.2	Ensembl	1572	chr8	-	90729655	90769939		GCCCGGGTCGCGCAGCGGAGGCCGAGGGCTGGGACGGGCGGCTGGGAAGTGGGAAAGGGA
ASHG19A3L0000906	260.701	197.07	7.94203	7.70526	noncoding	FN073667	lincRNA-COX10-2	lincRNA	97	chr17	+	13737557	13737663		TAACGACAGCATTGACTCTGCTCCCAGTGCTTCTCATACTATGGCCAAAACAGAAACAGT
ASHG19A3A010902	1317.05	1133.79	10.2736	10.2353	noncoding	uc001hje.2	CR624623	UCSC_knowngene	838	chr1	-	212731175	212732013		GTGGAAAGAGTCGTGGAATAAAGGTAGCTTTGGGGATTATGACGTGAATAAATGACAGAA
ASHG19A3L0002075	439.161	329.172	8.68656	8.45257	noncoding	AI379096	lincRNA-KCNU1-1	lincRNA	488	chr8	-	37006433	37025053		TTTAAGCTTCCCTGTGTGTTGTGAGCCTGAAGTTGTGGTCTGGTGAGTTGCTGTAACAAT
ASHG19A3A029164	1659.39	404.06	10.6083	8.75191	noncoding	NR_027109	LOC285593	RefSeq_NR	1412	chr5	+	173006656	173008612		GGGACATTAAAAGGAGGACTTCCACGTTTAATTCTGAATGGTCTATTTTATTTGTGCAAT
ASHG19A3L0000775	749.324	3198.3	9.45843	11.7162	noncoding	AB208948	lincRNA-STON2-2	lincRNA	4302	chr14	-	81726999	81893748	BX648249,	CTGTAGAGGTGAGGTTTTGTTTTTAGTTGTTCTACTGATTATATCCTTTTCTGAGCTATG
ASHG19A3A023478	370.527	88.9241	8.44367	6.54508	noncoding	AK054953		misc_RNA	2228	chr3	+	160981722	160983945		TCTACACATTACAGGTTTTACTGGTTTTAATAGTACTCTGGAAGGTGGCTTGAGGTGGAG
ASHG19A3A014624	71.2306	82.6279	6.07529	6.44263	noncoding	ENST00000420406	RP4-740C4.4	Ensembl	371	chr1	+	2357418	2362089		AGCAGGTGGCTTTTCTTGAGCGCCAACATTCTGCCCGTGGGTGAGTGAGGCCCTGGCTAC
ASHG19A3A027882	676.637	677.51	9.30995	9.49181	noncoding	ENST00000399853	CTD-2247C11.3	Ensembl	1565	chr5	+	5038633	5070107	NR_026994,	TCAACCTTCTCTCCCCAGAAAGATGTCAACACTGTGGAGATTGTGCTATGAAGATACCTG
ASHG19A3A036488	2467.65	4115.55	11.177	12.0811	noncoding	BC042009		misc_RNA	1288	chr8	+	28427271	28428544		ATTAGATGCCCAGCCTTTCTCATTCAGAGATGCCTGTATTATTATGTTATTTCGATTGCC
ASHG19A3L0001430	548.098	237.672	9.00157	7.97366	noncoding	AX747038	lincRNA-BANK1-2	lincRNA	3544	chr4	+	102341117	102995967	NM_017935,NM_001127507,NM_001083907,	CAGAGTTCCAGTCATTATTGTTACATCATGTTTGCAGAAACCTTGTCTTATTTAGTGTCT
ASHG19A3A031012	91.8461	83.972	6.44731	6.46589	noncoding	ENST00000434947	RP3-448I9.1	Ensembl	405	chr6	+	14394556	14404520		AACAGAGCTTGGAAGACCGACAAGTGAACAGTTGATAGTGTCCTGTTCTCCTGTTGTGTA
ASHG19A3L0000243	221.775	259.006	7.70976	8.09956	noncoding	chr10:44737519-44749219-	lincRNA-ZNF32-1	lincRNA	11701	chr10	-	44737519	44749219		AAGTCTTGTGATTGTTGTACCATATCCCATCTCCTTTCAAGGCTGTCAACTGGCGGAATG
ASHG19A3L0001905	1313.88	1159.12	10.2702	10.2683	noncoding	AI201851	lincRNA-NFE2L3-3	lincRNA	347	chr7	+	25988284	25988606		CTTCCTCCATTATCATCCCTCTCCCGATGATAAACCACTGGAATATACCTAAGTAAAAAA
ASHG19A3A025780	8623.42	4969.77	13.0033	12.3597	noncoding	ENST00000505987	HSP90AA4P	Ensembl	2173	chr4	+	88812994	88815167	NM_007355,	CTTCTCTGAGCTGGCAGAAGACAAGGAGATTATAAGAAATTCTATGAGGCATTTTCTAAA
ASHG19A3L0003380	172.236	209.139	7.34371	7.7941	noncoding	chr5:141438289-141445854-	lincRNA-GNPDA1	lincRNA	7566	chr5	-	141438289	141445854		GTATTTTGACAACTTTTTGTCTCCCATCACAGGTATGGGACCTAACTCTGACTCCCATTT
ASHG19A3A009654	53.0235	123.786	5.64311	7.03549	noncoding	ENST00000480386	RP11-357H14.4	Ensembl	566	chr17	+	46706036	46712294		CCAAATTCTCTACTAGGCCTCCGAACCAAAACGAAGGAAAATCCGTTTTCTTCTTGGGCT
ASHG19A3L0000280	180.663	170.339	7.41156	7.49621	noncoding	BM563811	lincRNA-RPS24-6	lincRNA	1081	chr10	-	79986913	79987966		ATTCAACAAGCATTTGGCTTTCCACCCCATGGTCACTGGGTCCTCAACACTAAAAGTCTT
ASHG19A3L0003006	208.718	187.91	7.62202	7.6358	noncoding	AI741919	lincRNA-INO80D	lincRNA	468	chr2	-	206966865	206967332		AATGAGAAAACCTTGGTTTTAGAAACTACCTCCCAGACAGAAAGTAAGTATATAGGCTGG
ASHG19A3L0001329	126.384	124.197	6.90303	7.03963	noncoding	AA420706	lincRNA-P2RY1-2	lincRNA	340	chr3	-	152716537	152716869		ATTATTGCTAAACCTCTGTTATTTGTGTTGCTATCACATTCTGCCCCCAGCTGGGGTCGA
ASHG19A3A007764	143.665	133.226	7.08171	7.13915	noncoding	NR_033360	MEG3	RefSeq_NR	1621	chr14	+	101292444	101327358	uc010txe.1,	TGTCCACGGGCTCTCCTTGCATCAGGGCTAATCTCGGGCCTTGTCGAAGGAAGAGGCTGC
ASHG19A3A034200	446.754	594.94	8.71108	9.309	noncoding	HIT000243085		H-invDB	1541	chr7	+	36118694	36125390		AGCAGAGTTTTCTCAAATGCAGAGTTGCCCTTGATTTTGAATGCCGTTCTCTCCCTGATC
ASHG19A3L0001806	115.564	120.576	6.77536	6.99704	noncoding	chr6:47317091-47336991-	lincRNA-TNFRSF21-1	lincRNA	19901	chr6	-	47317091	47336991		AGAGGATACAAACACGAGTGGTACCTAGTTCCTGCCCTTAGGAAATCTGTCATTTATGGG
ASHG19A3A049080	1240.45	1755.06	10.191	10.869	noncoding	ENST00000477702	NCRNA00173	Ensembl	314	chr12	+	116973868	116974323	NR_027346,	TGGAGACTCCTATTCACCCTTCAGATCAATATCCCCCAAATAAACTCCCAGTCACTCTGG
ASHG19A3A016684	127.974	106.102	6.92051	6.80723	noncoding	uc002uns.1	AK125001	UCSC_knowngene	1765	chr2	+	181988563	182264280		AAGGTAAATGGGATTCCCTATCCTTGTTTCCCAGTTTCGGTCATGGTATTGCTTATCCAT
ASHG19A3L0002204	276.799	337.286	8.02916	8.48602	noncoding	EG328305	lincRNA-NCS1	lincRNA	333	chr9	-	133231603	133234745		TGATGTTCTCACCCCCAATGATACTGACCGATGGGAACTCATGCACAGACACCTCCACCT
ASHG19A3L0003451	557.598	525.019	9.02445	9.13174	noncoding	chr10:112147868-112175330+	lincRNA-DUSP5-3	lincRNA	27463	chr10	+	112147868	112175330		TTCTACTTCAGTCTGTATCCAGCCCCTGCACCCAGTATAATGTAGTAGAGTATTTCTCGG
ASHG19A3L0000375	90.9981	79.7108	6.43231	6.39458	noncoding	BX115137	lincRNA-LRRC4C-3	lincRNA	391	chr11	+	37960150	37976213		CCCCTGTCTGTCTAATATCACTGAGTTTCCTTATAACTTCAGTTCTTAAAAGCTTCATCA
ASHG19A3L0001687	156.859	115.165	7.21174	6.92657	noncoding	CD516039	lincRNA-THBS4	lincRNA	510	chr5	+	79306992	79307717		GATCAAAAACCACTTCATTGAGGAAAGCAACCCACCAAACACAGAAGCAGAAAGAGAGCT
ASHG19A3A015325	1701.02	2038.44	10.6516	11.0836	noncoding	ENST00000417473	AC099344.4	Ensembl	499	chr2	+	11534106	11542372		GAACCTTCTCAGCTTATTCAGAGAGGCTTCTTCTTCCTATTTAGTCTCCCTCTGGCTTTC
ASHG19A3L0001152	2611.22	2750.63	11.2603	11.5077	noncoding	CD514437	lincRNA-WDFY1	lincRNA	836	chr2	+	224717164	224717876	NM_017925,	TGAAGTTACTGAGTTTGAGGAATGGCAAATTAAATTTGCCTAACCCCCAAAACAAATGAA
ASHG19A3L0003570	67.3083	68.0761	5.99251	6.16855	noncoding	chr3:181954931-181963411-	lincRNA-SOX2-6	lincRNA	8481	chr3	-	181954931	181963411		CCAGAGACCCACTTGTCCATCTCATTATTGTTCTTTCAAAAGACTAATTGTGTCAGTTAT
ASHG19A3A014169	314.576	272.478	8.21019	8.1762	noncoding	ENST00000445083	AC019100.3	Ensembl	611	chr2	-	108784203	108834297		TACTAGAATGTTCTCTGCCATCCACTAAGCATTGAATCCCTCCAGACACTGTTACAACAG
ASHG19A3L0002436	215.764	152.08	7.67043	7.33283	noncoding	chr9:20028084-20041430+	lincRNA-MLLT3-1	lincRNA	13347	chr9	+	20028084	20041430		TTTTGCTAGTCTTGTCTCTGTTCCGCCTGCTGTGGCAATCAGCTTTTGCAAATACTGTCA
ASHG19A3L0000175	88.6744	78.6534	6.39317	6.37598	noncoding	chr1:84714587-84726087+	lincRNA-SAMD13	lincRNA	11501	chr1	+	84714587	84726087		GTTTTCCTCCTTTAAAGAGCCTGTAGTTGAGTTCCAGAGACCTTATCCTGGAGAACAGTG
ASHG19A3L0000485	3235.19	3352.94	11.5798	11.7825	noncoding	chr12:38784383-38812908-	lincRNA-ALG10B-1	lincRNA	28526	chr12	-	38784383	38812908		CAAGTTACTCCCCTTCCCTAAAGTAGCTACTGTTAATCTTTTGTTGTGTGTTCTTAAAAT
ASHG19A3A044647	1124.72	1198.96	10.0512	10.3143	noncoding	uc001lkg.1	AK124226	UCSC_knowngene	3086	chr10	+	129979399	130115990		TGTCCTCATGTTAACCCCCTTATGCTGTCTCCTCCAATAATGCATGTGGTTTGGTCTCTA
ASHG19A3L0001002	124.156	248.776	6.87768	8.04325	noncoding	DA829587	lincRNA-ZNF516-2	lincRNA	815	chr18	+	73178827	73179640		TGTATCTCCTTTTCAATCTGCCTAAAATGACAGCTGGGCTTCCGACAGTGGGTTTCTTAT
ASHG19A3A016945	95.5818	97.6344	6.50694	6.68072	noncoding	uc002vga.1	AX747067	UCSC_knowngene	2348	chr2	+	217079049	217081397		CACAGGAAAAGGAATTCAGGGGCTGCTTCAGAATCCCATCTTTGCCAGATACGTTAACTT
ASHG19A3L0002546	218.168	210.197	7.68794	7.80095	noncoding	chr7:117584264-117586960+	lincRNA-NAA38	lincRNA	2697	chr7	+	117584264	117586960		ACACTTACATTCAGTACCAGGATTGTGTTAACTCCTATGCCCTCATAATATAGTCCAGAG
ASHG19A3A034234	4040.7	3843.87	11.9039	11.982	noncoding	ENST00000340510	AC004987.7	Ensembl	3049	chr7	+	39773230	39832691	NR_026999,	TTTTCTCAACACGGCCTCCTAGTCTCCTTCCCGCTTGGGCATCTGTTTTTCTTATATAGA
ASHG19A3L0002017	304.236	251.464	8.16273	8.0588	noncoding	chr8:135201218-135216768-	lincRNA-ST3GAL1-2	lincRNA	15551	chr8	-	135201218	135216768		GACACCTTTTCCCCATCAGACTGAAGGACAAATTTTGTTCGTATTTCAGCATAATTTATT
ASHG19A3L0002975	18957.7	10892.8	14.1378	13.4847	noncoding	AK097341	lincRNA-GPRC5C	lincRNA	2227	chr17	+	72130786	72443566	NM_022036,NM_018653,	CCTGGATCTTGCTCCTCTGTGAGGAACAAGGGTGCCTAATAAATACATTTCTGCTTTATT
ASHG19A3A034487	227.252	196.601	7.74314	7.70193	noncoding	ENST00000419595	RP11-458F8.1	Ensembl	298	chr7	+	66313482	66323123		AGCCAAAGGTCCACCCCTTTTTTCCAGTCTCAAGCTGAAGATCTTTATGTAGAAGGCCTT
ASHG19A3L0000967	300.762	279.442	8.1472	8.21373	noncoding	chr18:47271277-47283077-	lincRNA-LIPG-2	lincRNA	11801	chr18	-	47271277	47283077		TTAGTCCTGACCACCCTTCCTTCTCTTGGAGGAAGACTTTCCTTCATTCAGGTACTTACA
ASHG19A3L0000768	87.0617	74.7934	6.36418	6.30405	noncoding	chr14:76020622-76030872+	lincRNA-FLVCR2	lincRNA	10251	chr14	+	76020622	76030872		TTTGGATTCTAAGTTGAAATGAGCCCTATTCCTTTGCAGCTCTTAGGAATCAGCTTGCCT
ASHG19A3L0001645	163.736	178.505	7.27322	7.56589	noncoding	chr5:3737400-3749175+	lincRNA-ADAMTS16-4	lincRNA	11776	chr5	+	3737400	3749175		AAGATACTTCTAAGGTGTGAGGCCACAGCTCTGAGGCTCCTGGGTGTCATCACCTTCTTG
ASHG19A3L0000807	313.307	448.216	8.20403	8.90634	noncoding	chr15:38053658-38074458+	lincRNA-TMCO5A-3	lincRNA	20801	chr15	+	38053658	38074458		CTTCTAAGCTTTTTCTACATTAAATCCAGATACTCAATCTTCTCCCAGTGATTGAAGGAT
ASHG19A3L0003232	375.977	356.908	8.46425	8.57112	noncoding	AI763350	lincRNA-SREBF2	lincRNA	486	chr22	-	42307296	42310570		CAGGGCGCTGACAGAGCTTCTGAAGCAGCCGGGCCCCCAGGAGCCACTGCCTCCCACCCT
ASHG19A3L0000896	166.909	145.317	7.29895	7.26563	noncoding	AW182066	lincRNA-LOC100506581-4	lincRNA	277	chr16	+	86669933	86670751		ATGCATTTCCCCTTCTTTTTTATAGAGAGGGAGGTTGCCAGCTGCCTTGAAGAAAAGGGA
ASHG19A3L0001793	331.456	339.312	8.28516	8.49538	noncoding	AL711564	lincRNA-PIM1	lincRNA	605	chr6	+	37085130	37085729		AGAGGGAAAATACAGGCCTCAGTCCCAAGTCTGCTCCCAACTCTGGGTCCTTGAGTAATT
ASHG19A3L0001418	70.6846	64.9988	6.06488	6.10269	noncoding	BX104557	lincRNA-SHQ1-3	lincRNA	526	chr3	+	72663304	72665344		TTCTAAAGCACAGATGGGAAGAAATGGATCTTGTCTACGATCTACCCTGTACCCAACTGG
ASHG19A3A000389	367.534	355.346	8.43196	8.56422	noncoding	ENST00000471496	RP11-393B14.1	Ensembl	1490	chr3	+	183165395	183173801		ACACTGCCTGAGCCCGCTGCTGTTGCCAAGagtctcacttcatcaccatgctggagtgca
ASHG19A3A021600	289.75	294.779	8.09526	8.29181	noncoding	ENST00000502521	RP11-933H2.4	Ensembl	1978	chr3	-	131043935	131100319		TATTCATTCTCCTGCTGAAGTACATTTCAGGTTGTTGCTATTCCTCTGCTGATCCCCCTC
ASHG19A3L0000902	110.409	124.374	6.71223	7.0413	noncoding	BY797754	lincRNA-ZNF469-2	lincRNA	538	chr16	+	88333119	88333657		TCATCTTGAGGCATGGGGCTGTGGCTTCTGGGAGTCATAGCTGAACCCAGGGAAGCTTTG
ASHG19A3L0002157	726.592	719.606	9.4146	9.57797	noncoding	chr8:90889605-90908427-	lincRNA-RIPK2-3	lincRNA	18823	chr8	-	90889605	90908427		AGGCTCCTCCCTGCTTTAAGAGACATAAGGAATTCATTTAAGGTAAGTTATTTCTTACCA
ASHG19A3A021998	889.199	951.24	9.70779	9.97746	noncoding	ENST00000392635	RP11-252O18.3	Ensembl	486	chr3	-	181584132	181584942	NM_017665,	GATTCTTCATCAGAGAGTGAAGAAACATCTACCTCTTCCTCCTCAGAGGACAGTGACACA
ASHG19A3L0001655	220.381	208.916	7.70055	7.79306	noncoding	chr5:49632068-49662143-	lincRNA-HCN1-1	lincRNA	30076	chr5	-	49632068	49662143		TGAAGCACCATGATAACCTGTGGCCCTCCGTTAAGTACAAAAGGTAGAATTTATTATTAA
ASHG19A3A015592	109018	100908	16.746	16.6167	noncoding	ENST00000429825	AC013717.3	Ensembl	488	chr2	+	44497759	44498247	NM_000976,ENST00000495231,ENST00000484010,ENST00000477007,ENST00000432629,ENST00000374520,	AACATTGCTCGACAGATGCAGCACTGATCCTTAGCCAGAGAACTCTCTGGAACCATTAAA
ASHG19A3A040406	361.645	304.703	8.40926	8.34321	noncoding	NR_026975	LOC286467	RefSeq_NR	2951	chrX	-	130836678	130964671		TTTTCTATCTTCTGCTCTTTGCCACCTGTGAGGTCCCTGAAAATGAAGGCCAATACTACC
ASHG19A3A029945	2752.34	1453.23	11.3405	10.5931	noncoding	AL832122		misc_RNA	5572	chr1	-	23607802	23613245		GGTAGGTAATTTACTTTCTATTGTACTCATAGTTTGTTTGAAACCTCTTCACCTCTATCC
ASHG19A3L0002747	95.2571	66.5734	6.50153	6.13569	noncoding	AB231705	lincRNA-BTG4	lincRNA	706	chr11	+	111322063	111327330		AAGAATGCAACCTCGATGCCTACACTTCCCCAAGAACTGGGATAATGTCAATAAGGAGAG
ASHG19A3A032951	1555.76	1287.54	10.5173	10.4172	noncoding	uc010lac.1	LOC493754	UCSC_knowngene	4265	chr7	-	65993445	66057363		AATGATGACCATGTGGACATGCTTTCGGGCCTTCAGGATCTTCTCCAGCCAGTGGATGTC
ASHG19A3L0000338	416.671	324.526	8.60693	8.43196	noncoding	AA827066	lincRNA-KIRREL3-1	lincRNA	472	chr11	-	128165590	128166053		TTCCCTCACTCCTCATCTTCAGCCAGGAAAGATCTGCAAGGCAGTTTTGTTAATTTCCTA
ASHG19A3L0003126	12704.9	13759.8	13.5617	13.8222	noncoding	BU729004	lincRNA-MAP3K1-2	lincRNA	599	chr5	+	55838650	56109992		TCAGGCTTTTGTCTAAATATGTGAAGACTGACAAGACTATCTCCCCTCGTGCCGAATTCT
ASHG19A3L0001849	486.627	473.111	8.8313	8.98019	noncoding	AI621345	lincRNA-SLC26A3	lincRNA	351	chr7	-	107517667	107517966		AACCCATAGATGCCTTCTCGCTTCCTTTCTCTCTCTAACTGAGACTGAGATAAGAGGAAC
ASHG19A3L0002069	830.982	775.455	9.61004	9.68994	noncoding	DB078790	lincRNA-EBF2-1	lincRNA	568	chr8	-	26047433	26047981		TTAACTAAAGCCCTGGTCTCACTTTACCTGCCTTATCCCACCACCAGAGTTGTTGTTGTT
ASHG19A3A039244	73.0337	94.1712	6.1113	6.63001	noncoding	ENST00000441473	RP11-343J18.2	Ensembl	316	chr9	+	128819858	128921892		ATTCTGTGGCAGAGATTAAAACAATTTCAGAAGCAGGCACCCAATCCTTCTCTTTGGATG
ASHG19A3L0002672	236.303	257.864	7.79919	8.09382	noncoding	chr4:178294426-178298806-	lincRNA-NEIL3	lincRNA	4381	chr4	-	178294426	178298806		TGTGAAGATTCCTTGTGTCCTCCAGGTTGAAATGGGAGTTCTTTTTCCTGTTTTCTCTTT
ASHG19A3L0002327	86.4845	80.5635	6.35429	6.40844	noncoding	BX096636	lincRNA-STARD8	lincRNA	670	chrX	+	67791644	67792306		TGGCAAGATGTTAGTGAATCTAACTGGTGTGTATATGGGTGTTCAATGTGCTATTTTTTC
ASHG19A3A008093	1018.1	652.666	9.90855	9.44047	noncoding	uc001gjk.2	GAS5	UCSC_knowngene	1695	chr1	-	173833039	173837125		AATGGTGAGTTGGGGAACATAGAGAGTACACCTAAGTTCACATGAAGTTGTTTCTTCCCA
ASHG19A3L0003057	406.27	435.804	8.57412	8.86469	noncoding	FN091184	lincRNA-INHBA-1	lincRNA	83	chr7	+	41046322	41046402		GAAAGGCCTGTTGTAAAATACTTGGTTCTGTCTTGGATACTCACCCTTCTCCTTCTTGAC
ASHG19A3A009981	352.073	327.7	8.36814	8.44609	noncoding	ENST00000366365	C17orf86	Ensembl	1028	chr17	+	75084949	75086180		TGTAGTTAGTATCAGAGAGCCCTTGCTTTTCAAAACTTCATAAACAATGTTACTGTCATG
ASHG19A3A037062	229.73	196.343	7.75809	7.70055	noncoding	ENST00000424605	RP11-125B21.2	Ensembl	746	chr9	-	2535651	2570754		ATATGAGAAATGTCACCTCCTGGCTACCACAATAATGCAACTAGGAGTTCTGGTTCTCCG
ASHG19A3L0002750	1150	918.842	10.0833	9.9262	noncoding	EB386665	lincRNA-SLN	lincRNA	821	chr11	-	107644071	107644892		GCACAGCCATTTTGTATACTCCCCTGAACTCTTATTCTTTAAGAACGTTGACTTTTCCCC
ASHG19A3A055152	370.856	544.716	8.44501	9.18576	noncoding	uc002nrw.1	AK094188	UCSC_knowngene	2480	chr19	-	28221180	28237138		ACACATTTAATGACAGAAGTCTCAGGCTGGAAACACTCTTTTTGTAGAACATACAAATGG
ASHG19A3L0002376	1157.56	1342.2	10.0929	10.4764	noncoding	AA457263	lincRNA-GPR61	lincRNA	451	chr1	+	110072368	110072818		TATAACCCTGTAAGTAAGAATCCAGCTCATTAGGTACTACTGAACTCCCCTCTGACAGCC
ASHG19A3L0001739	876.787	959.396	9.6856	9.99054	noncoding	chr6:140889232-140902332-	lincRNA-CITED2-2	lincRNA	13101	chr6	-	140889232	140902332		CTATCTCGCAGATCTTCTGGTCTCTTGCTCCCACCCATAGAGAATTCAATTGTATTTTTT
ASHG19A3L0002722	892.444	870.485	9.71309	9.85157	noncoding	BF679456	lincRNA-OPCML	lincRNA	700	chr11	-	133309334	133559552		TAAAAAACAACAAGCAAACGAGCTGATGACAAACTCCCGCCCAACAGTGAAGGAACCACA
ASHG19A3L0002328	93.4907	102.757	6.47237	6.75903	noncoding	BF511390	lincRNA-STS	lincRNA	344	chrX	-	7532690	7533347		TATCAGAATACAGTTGCTGTCCTTGCCAAAACAAAGACACCTGGTTCCATGTGTCAGCCT
ASHG19A3L0002142	538.094	438.84	8.97804	8.87414	noncoding	chr8:86474623-86517048-	lincRNA-CA2	lincRNA	42426	chr8	-	86474623	86517048		ATAGTTCAGCAGAATGTCTGGCTGTTCTTGGCTGAGTTCTCCTTCTCTTGCCTTAGCTAT
ASHG19A3L0000534	181.448	110.411	7.4188	6.86442	noncoding	AA405014	lincRNA-TMTC2	lincRNA	267	chr12	-	85065883	85065950		CATTACATGGCTTGGTACTCAATAAAGGAAAACTTGTTCAAATAAGGTAATATCGCAGCA
ASHG19A3A044503	128.496	139.351	6.92659	7.20453	noncoding	AK130806		misc_RNA	1439	chr10	+	114590927	114592210		TACAACACGTAAAATGTGAAAAAGACCTCTGACCCTGAAAGTCTCATTCTGCCCAGGCCA
ASHG19A3L0001572	1140.94	2008.03	10.0707	11.0622	noncoding	BG897081	lincRNA-CSNK1G3-1	lincRNA	416	chr5	-	123716880	123717209		TATTCTCAATAACAGAGAAGAAAAATAGAATTTCTTGCTTTGGGTGTGTGTGTGTGTGTG
ASHG19A3A037807	233.811	244.955	7.78355	8.01925	noncoding	uc004bad.1	AK057451	UCSC_knowngene	1544	chr9	-	102348067	102582171		TTCGAGAAGATTTTGTGGCCTTTCTCAGCTGTCTAGGTGCTGTAGGTGCTGTGTTTCTAT
ASHG19A3L0000132	116.652	116.955	6.78913	6.94968	noncoding	BI459631	lincRNA-GUCA2B	lincRNA	732	chr1	+	42501816	42502537		CCGGCGCCCTACCTCAGCCTGTAAACAGTATCAGGTCTCGCCCAACAAAAATCCAATGGA
ASHG19A3A036816	804.784	849.239	9.5672	9.81845	noncoding	ENST00000405813	AP003356.1	Ensembl	534	chr8	+	103819069	103819607	uc003ykw.1,	TAAGACTCTGGGTCTGTCTGTGGGAAGAGCTTTCATTCCCCACCCCACTCTATGCCGACC
ASHG19A3L0002748	1766.83	1137	10.7042	10.2383	noncoding	DQ916738	lincRNA-ZC3H12C-2	lincRNA	2761	chr11	-	110066286	110167437		GCAGAAATCGATGCAACATTTCTTTCCTGTCTGGGCTGTTTGTATAATTGTATATAAATG
ASHG19A3L0000718	599.215	494.522	9.13154	9.04824	noncoding	BX485243	lincRNA-SRP54	lincRNA	590	chr14	+	35432234	35432824		ATGGCATCATTCCCCCATGAACTGCTATTCTGTGGCATACACGATACCTGCTGAAAAAGA
ASHG19A3L0000899	361.644	391.621	8.40881	8.70541	noncoding	chr16:87577874-87589624-	lincRNA-ZCCHC14	lincRNA	11751	chr16	-	87577874	87589624		ACTTATAAAAATCCCTCCACACAGAAAACTGTGCCTTTCCAGGCTGAGTCCACTCGGATA
ASHG19A3L0001511	337.925	297.723	8.31172	8.30712	noncoding	chr4:5995874-6009524-	lincRNA-CRMP1-2	lincRNA	13651	chr4	-	5995874	6009524		AGCACCCACTGAATGGCTAGCTCACTTCCTCCTTATCATGTCCCGATGACGCAGGGAGAG
ASHG19A3L0000455	1437.65	1331.45	10.4006	10.4655	noncoding	chr12:132296472-132307497-	lincRNA-SFSWAP-1	lincRNA	11026	chr12	-	132296472	132307497		TTGCTCTCCCTCATCCCAACTGTGGAGCCCAGGAAGCAGCTTCCTGAGTCCCTCTAGGGC
ASHG19A3L0002267	98.0558	98.1956	6.54475	6.68986	noncoding	DB264073	lincRNA-EGFL6-1	lincRNA	596	chrX	+	13470108	13496407		AAACAGATGCTCCTTCAGCCTCCTGAAATAAGAGAGGTTTAATACTGGAGTGCACCTGGA
ASHG19A3A015366	582.22	652.997	9.0893	9.44131	noncoding	uc002rdf.2	BC068572	UCSC_knowngene	3008	chr2	+	20068620	20084807		ACAAAACACAGTCTGACTTAGAGATTCTCTGGCATGACTCTCTTCCCCACTGTGTACACT
ASHG19A3A029214	620.128	419.766	9.17915	8.80665	noncoding	ENST00000433327	RP11-423O2.4	Ensembl	153	chr1	+	142799586	142799739		TCCTGTTTTGAGAATGTTAATGGATACACCAGCTGCTGCTTTGGATTTCACCCATTGGCG
ASHG19A3A029633	7882.42	13561.4	12.868	13.7992	noncoding	NR_001590	IFITM4P	RefSeq_NR	342	chr6	-	29718584	29718925	ENST00000441380,	ATTCACCTACTCCCTGAAGTCTAGGGACAGGAAGATGGTTGGAGACCTGACTGGGGCCCA
ASHG19A3L0002910	149.477	152.635	7.14207	7.33768	noncoding	AI149906	lincRNA-NEDD1-7	lincRNA	480	chr12	+	96859717	96860187		TCTCTGATGATCGTTCCCTTCTTGAAAGCTATTCCTTCTTCAGGATTATTCACCATGATT
ASHG19A3L0000594	107.395	88.7283	6.67584	6.54204	noncoding	chr13:20881350-20901600+	lincRNA-CRYL1	lincRNA	20251	chr13	+	20881350	20901600		CTCTTCAGATCTTCTGTGGGTGCTCTGTCCCCCAACAGAAGTTACTCTGCAATGTTAATT
ASHG19A3A033600	76909.4	62580.5	16.2281	15.9553	noncoding	ENST00000421078	AC008155.1	Ensembl	329	chr7	-	138088939	138089268	NM_001099285,ENST00000354355,	GCTGAAGATGATGCGGATGACGATGTCGATACCAAGAAGCAGAAGACCCACGAGGATGAC
ASHG19A3L0001813	145.096	157.985	7.09598	7.3877	noncoding	AV723845	lincRNA-KIAA1586	lincRNA	673	chr6	-	56933276	56933924		GGAATGTGTGTCACATAATTCCAAAGATCCAGAATCTCTTTCTTTTCCTTTTCCTCTCTT
ASHG19A3L0002165	226.948	211.852	7.74122	7.8123	noncoding	AW661714	lincRNA-TP53INP1-2	lincRNA	451	chr8	-	95962452	95963624		TTGGTCTGGAAAACACTTTCAAGCCCACTGTCTCACTCTCTTGTCACTATAAATAACCTG
ASHG19A3A041206	829.496	639.895	9.60704	9.41261	noncoding	ENST00000445336	RP11-451L9.3	Ensembl	2725	chrX	+	74802493	74805341		AGAAAAGAGATGAGAGACCACTCTTTCCCCAAATTCTCACCTCTATTAAGCTGCTGACCC
ASHG19A3L0002203	1149.51	1183.77	10.0826	10.2956	noncoding	AA972029	lincRNA-MPDZ-1	lincRNA	419	chr9	+	12958862	12959235		TCATTGAGGTCTCTTTCCTACCCCCTGCATGCCTATAATGTCCCAGACCAAGAGTTTTTT
ASHG19A3L0000397	127.62	77.0518	6.9165	6.34778	noncoding	BG946037	lincRNA-MYEOV-3	lincRNA	657	chr11	+	68999255	68999879		TCTTCACAAGATATGTCATATCTAACCCTGGTCCTTTGACTGTGACTATCTGGAATAGCG
ASHG19A3L0002921	87.4948	80.187	6.37256	6.40149	noncoding	AW872580	lincRNA-MYO1B-3	lincRNA	381	chr2	-	192419797	192420136		ATTAAAGGAGAACCATCCTAGTTCAGCCTCTGCCAGGTTAGACCAAAAAGTGGATTGCTG
ASHG19A3A036325	86337.9	72318.8	16.4032	16.1599	noncoding	ENST00000438775	AC087763.1	Ensembl	303	chr8	+	8819268	8819573		GGGGTCAAGTATACCCCCAATCGTGACCCTCCGGACAAGCGGTGGGCCCTGCACTCATGA
ASHG19A3A012488	1588.45	1796.04	10.5488	10.9004	noncoding	ENST00000392268	AC008507.1	Ensembl	756	chr19	+	30528329	30529091		AATACTGCCAATGAATCATCAAATGCATTGAAAAAGCGTGAAGAAGATGATTATGATAAT
ASHG19A3A055144	236.179	157.711	7.79818	7.38485	noncoding	uc002lal.1	LOC647946	UCSC_knowngene	2306	chr18	-	36786887	37380282		GCGCAATGTGGGGGCACCAGAAGCGGGCACCGTTGAGCTGTTGCAACTGTTCTGCTGGTA
ASHG19A3A035956	124.976	139.538	6.88717	7.20671	noncoding	ENST00000501400	AC011118.2	Ensembl	1914	chr8	-	94358694	94712661		TGTAGTTTCCAATGAAACAGGAAGGACTCTAATTGAGTGCCTGCCCACATCTCTACAGCT
ASHG19A3A054558	513.442	373.976	8.90535	8.63933	noncoding	AK094311		misc_RNA	2618	chr16	+	49331053	49333673		ATTAAAAACATTGCTGCCGCCTACTTCTTCCAGCTGGGACTTCAGGACCATCTTTGAATC
ASHG19A3L0001968	67.2537	94.2703	5.9914	6.63188	noncoding	DB454079	lincRNA-CSMD3-2	lincRNA	478	chr8	+	111779094	111784988		GGGAAAAGTACACCCATGACCTAAATAAGTTTTCTGAACAATCCTTCCTTTTTAGTTTGT
ASHG19A3A036809	108.827	121.489	6.69355	7.0069	noncoding	ENST00000427337	RP11-445P19.1	Ensembl	424	chr1	+	187412759	187446354		ATGTGGAGAAGAAAGAACACTCAGATGTGCCCTGGAGACTTTCCTTTTATTTTTAAACAG
ASHG19A3A036104	76.5118	71.17	6.17791	6.23245	noncoding	uc001gov.2	AF387615	UCSC_knowngene	137	chr1	+	181382578	181382715		TCAAGGCCCACGAGGCGCACAAGATGCAGAGCACCCCGCAGGCCCGGCGCAAGGAATGGG
ASHG19A3A035501	318.206	323.237	8.22672	8.42633	noncoding	AK091593		NRED	3013	chr8	-	9757575	9760588		TGCTGCTTCCACAGAGAAAACATTTTCTCTTTCCTCCTCTTGAACTTACATAATATCCTC
ASHG19A3A022858	80.8051	98.6248	6.25718	6.69595	noncoding	uc003dqo.2	BC050344	UCSC_knowngene	4299	chr3	+	87138429	87147851		TTTCCTACAGGAGCCTCAAGACTGCGTTTCAGGAAGCCCTAGGACCCACTGATCCTGCAG
ASHG19A3A000042	808.556	1465.62	9.57153	10.6054	noncoding	BC052961		NRED	4283	chr3	-	9430536	9438342		ATCAAATTTGAATGGATGAGGAGTTGCTTTTTAGGTTGCTCCTTGAGGGCAGGACAGTTC
ASHG19A3A041603	300.915	189.519	8.14792	7.64686	noncoding	uc004fai.1	AK055694	UCSC_knowngene	2222	chrX	+	135991553	136075814		CTCCTTTGCTACTCTGCTAGATATCCTTACAATTTGGTTTAGAATTTTAGTACCACTAAC
ASHG19A3A008537	337.911	339.469	8.31156	8.49591	noncoding	uc002ioy.1	AK097622	UCSC_knowngene	1754	chr17	-	47535222	47539111		TGAGATGCTGTGCAGTTATGACATATCCTCCCACCACAAAAGAACATTCCAGCTTGTCCA
ASHG19A3A029582	89.363	107.37	6.40568	6.82546	noncoding	AX721103		misc_RNA	642	chr6	-	28083684	28084323		CTCTGGTGTCAAATAACATCTGAGCTGTGATGAAAGACTTTCCCACACTCACTACATTGG
ASHG19A3L0001932	333.899	350.42	8.29588	8.54332	noncoding	BM682695	lincRNA-ZNF92-3	lincRNA	234	chr7	+	64442423	64467056		TCCAGGCATTGCCACTCCTCCAAAGAGAATTCTATGGCCACATCCATAAATGTCAATGGT
ASHG19A3L0000430	98.9826	135.419	6.55885	7.16272	noncoding	CA414224	lincRNA-CHST11	lincRNA	524	chr12	+	104760577	104761388		ATGTCACAGAGGATTTGGTGATCAAAGCCAGTGTCCCTCAGAATTTTTCTTCACCCTCGT
ASHG19A3A015679	215.397	212.565	7.66839	7.81741	noncoding	ENST00000452840	AC007092.1	Ensembl	4077	chr2	+	58655472	59290901		TCATCCTCATTGTACTCCCTTGGCATCTCATGGTGACGTGACTTAGAAGGTGGTGCAGAG
ASHG19A3L0003567	308.725	207.748	8.1835	7.78446	noncoding	chr3:168554930-168560248+	lincRNA-MECOM-1	lincRNA	5319	chr3	+	168554930	168560248		GTCTTCAGGATTCCTTTTGCCTTGCTTTGTCTGTTGTGAGTATATTTGCATGAAAACAGG
ASHG19A3L0000596	92.0297	78.8074	6.45053	6.37821	noncoding	chr13:22305525-22317225+	lincRNA-SGCG-4	lincRNA	11701	chr13	+	22305525	22317225		ATTCATGCTTCATGGTACCAATGTGCTCCTCACTGTAGCAGTGCTGACATTCCATCTCAA
ASHG19A3A041680	210.393	289.867	7.63506	8.2651	noncoding	NR_027456	LOC100272228	RefSeq_NR	3285	chrX	+	149106765	149185018		ATGGATTTCCAAATCTGACACACCATAGCCTGAATTCTCACCAGTTTGCTCCTGGAAAGG
ASHG19A3L0001018	153.619	125.994	7.18181	7.06134	noncoding	BI024558	lincRNA-INSR	lincRNA	328	chr19	-	7430216	7430546		TGGGACCTTCCATGACATCTGGACTAATTCCTTCACTGCTTGCATCTCAGTGTCTTTTTT
ASHG19A3A000482	707.621	951.548	9.37731	9.97804	noncoding	ENST00000510652	AL358933.1	Ensembl	1517	chr6	-	28089594	28104644		AGAAAACGGACGGAAGAAAAGGTCTGGCCGGAGATGGGTCTCACTCTGTCACCCAGACTG
ASHG19A3L0003212	906.811	1092.03	9.73604	10.1785	noncoding	chr8:129178878-129187868-	lincRNA-MYC-1	lincRNA	8991	chr8	-	129178878	129187868		GTCAGAGACATAGAGTTATTATCATCTCATCTCAGAATACTCTCCTCCTTCATTTCCATC
ASHG19A3A007222	383.916	431.464	8.49579	8.85077	noncoding	NR_024053	HCG18	RefSeq_NR	6600	chr6	-	30255173	30294927		TTAGCCTTTTAACATTCAAGGATTAGAGCTCCCTCTTTGCCCACTAGCAGGGCATTAGCT
ASHG19A3A052889	324.03	453.906	8.25308	8.92287	noncoding	ENST00000500703	AC012170.2	Ensembl	3624	chr15	+	50655997	50660476		ACTATCTGGAAAACTGTGCTAATAGTGCCTGATCTACACAAATTTAAGTGACTATACCCC
ASHG19A3A026009	73.3277	76.1034	6.11644	6.32947	noncoding	uc003ifn.2	AK090904	UCSC_knowngene	2962	chr4	+	128758921	128761883		ATACTCATGTTTTCTAACAAAACAGCTTTGGATTTATAATGCTGCCAGATGTCATTACAA
ASHG19A3L0001890	3388.51	3314.85	11.648	11.768	noncoding	AK124321	lincRNA-RNF32-3	lincRNA	2538	chr7	+	155755325	155759037		ATTGACTAAGGAAAGGAGAAAATGGAAGAAGAACCCCCTCCTGCTTAGATGCAGTCATTT
ASHG19A3A040154	87.769	120.394	6.37734	6.99477	noncoding	AK055743		misc_RNA	1824	chrX	-	93646477	93648287		AATTTATTCTCCTGATCTAACTGTAGATATCATTAGTTTTTTGTTTGTTTGCTCCTTCTT
ASHG19A3L0000303	273.249	341.144	8.01095	8.50333	noncoding	BU626341	lincRNA-RDX-2	lincRNA	692	chr11	+	110090981	110091622		CTATGTATCTAATGTGCTGTGAACTGATAAAACCTGGATCTAAACAGCCTCTGTAAAAAA
ASHG19A3L0001533	218.116	260.043	7.68725	8.1059	noncoding	chr4:79623626-79634676-	lincRNA-ANXA3-2	lincRNA	11051	chr4	-	79623626	79634676		TCCTTCTCCTGATCTGTTGGCCTCTCTAGAGGCACTGTTGTCCCATCATGGGAACTATCC
ASHG19A3A030672	217.999	158.82	7.68629	7.39586	noncoding	ENST00000423268	RP11-631F7.1	Ensembl	311	chr6	-	148558720	148604544		GGTGAATAGCTGCCAAGTGGTGGAGGTTGGCCTGCAGTGAGCATCAGTCTGACTTCGAAG
ASHG19A3L0000014	812.234	819.676	9.5788	9.76784	noncoding	BX478947	lincRNA-CD53	lincRNA	685	chr1	-	111460165	111460747		AGTTATAGATCTCAAACTAATCCCAGTCCCTTACCTATATCACCCCTTAGCTGATCTAAT
ASHG19A3A033187	168.125	206.566	7.30768	7.77665	noncoding	uc010lfm.1	AK310300	UCSC_knowngene	1228	chr7	-	96251317	96293650		ATCATCTCTACCCATAAAAGATGGCATTCTGCAAGACTGAGAAGATGCCCACCTCCATTC
ASHG19A3A024385	3349.53	2606.7	11.6303	11.4404	noncoding	ENST00000509878	RP11-792D21.1	Ensembl	289	chr4	-	79570107	79570396		TGTGTATTAGGAATTCTGGGCAAAGCCTAAGCCTTGGAAGGAGGATGCTGTCTTGATCTT
ASHG19A3L0001759	580.148	569.217	9.08425	9.24585	noncoding	AI354683	lincRNA-FRMD1-1	lincRNA	439	chr6	-	168501721	168502166		TGGGGTCCCTGCCCCGGGCTAAGTGCACCCTGCCTGCCTTCTGGAGGGAGCATTGGGCTT
ASHG19A3A032658	110.165	146.207	6.70951	7.2738	noncoding	ENST00000420185	RP11-89N17.4	Ensembl	1589	chr7	-	33832779	33842742		TAACACATGGTACAAAGTCATGACGAGAAGACATGTGCCCCCTGGCCAAAACTATTCAAC
ASHG19A3L0003083	2707.63	2942.71	11.3151	11.6023	noncoding	chr9:87653896-87666946-	lincRNA-NTRK2	lincRNA	13051	chr9	-	87653896	87666946		GAAAAAACAAATAAAATTAAGGCTATCTTTAAGTTAACAAACACCACCCTCCCACCCAAC
ASHG19A3L0000538	26492.5	25861.5	14.6288	14.7184	noncoding	CD242216	lincRNA-ALX1-1	lincRNA	808	chr12	-	86094197	86094916		AACCCCTTAAAAATCTCCCTCCTATTTAACAAGGTTCCCGGGTTTTTGGATTGGAAAAAA
ASHG19A3L0001241	1666.04	1372.5	10.6151	10.51	noncoding	chr20:2142500-2155375-	lincRNA-STK35	lincRNA	12876	chr20	-	2142500	2155375		GCTCCCTCCTCTGCAACTCACCTATGCTTTCATTCTGAGCTATGGGCAGGAGGAGGTGAC
ASHG19A3A040585	78.7789	74.2367	6.22083	6.29261	noncoding	uc001hor.1	CR625980	UCSC_knowngene	1385	chr1	+	224622613	224709674		CTAGCAATGGAGTGTTACAAGTAATAGACCCTAAAATGTGGATTGGCAAATTGCAGGTAG
ASHG19A3L0000189	99.4237	74.6881	6.56597	6.30171	noncoding	chr10:102402035-102412460+	lincRNA-PAX2-3	lincRNA	10426	chr10	+	102402035	102412460		AAGCCTGTATTCCTTCTGCTATCAGACAGAACAAGCCCTTCACAATAGGAAGTTCCCTTC
ASHG19A3L0001315	382.611	447.776	8.4911	8.90535	noncoding	chr3:136790035-136808485-	lincRNA-IL20RB-1	lincRNA	18451	chr3	-	136790035	136808485		AAAGTCACCATGATTTCAATTCCGTCTCTCGTTTCTGATCCTCTCTGCACATCTGCTTTA
ASHG19A3L0002692	285.565	260.785	8.07312	8.11182	noncoding	BE043072	lincRNA-ZSWIM4-2	lincRNA	446	chr19	-	13972876	13991569		AACTCGGTGTTTCTCTACGTCTAACTCTCCTTCTTGCTGCAACGCATTTGCCGGGGCGGG
ASHG19A3L0001738	167.343	123.008	7.30253	7.02613	noncoding	chr6:140218607-140237032-	lincRNA-CITED2-1	lincRNA	18426	chr6	-	140218607	140237032		GCTGTTTTAAGGTTCTGGATTTTTACCTGCCACTTTCTAGCTCTGAACTTTAATTTGATA
ASHG19A3A028237	191.755	129.453	7.49911	7.10033	noncoding	ENST00000512947	CTC-236F12.1	Ensembl	712	chr5	+	55749652	55750364		TAATTACAGGTTGGCTTGTTTTGTTGCGCAATAGTGCCCCAGCCCGGATGAATGTCATTT
ASHG19A3L0002779	1050.61	1085.27	9.95473	10.1679	noncoding	chr15:56088155-56092624-	lincRNA-PRTG	lincRNA	4470	chr15	-	56088155	56092624		GTCCTCTAGGATTTTACATTCTTAGTTATCCATCCCCCCTGGCATTTTCAAACTATCTCT
ASHG19A3L0000138	115.662	142.929	6.77677	7.23976	noncoding	exon94-	lincRNA-DMBX1	lincRNA	161	chr1	-	46996996	46997156		TTTCTGTTTCCAAGACAGGCTTTGCTACTACTCTGCCATGACCCAGACACTTCCCACCAG
ASHG19A3L0002469	392.128	462.232	8.5243	8.94671	noncoding	chr1:29096302-29111760-	lincRNA-YTHDF2	lincRNA	15459	chr1	-	29096302	29111760		TAGTTGCCGTCTCACCTGTTATACCCCCTTATACTCCAAATATTTAAAACACAGCAGACT
ASHG19A3A029583	77.0801	74.1998	6.18788	6.29166	noncoding	uc003nkk.1	AK127889	UCSC_knowngene	2163	chr6	-	28089572	28105071		ATGCCAGACAGTGTTTCTTGGGATCCATCCAAATAGGTCCCTTATTTCTCTTTGTGGGAG
ASHG19A3L0002682	89.3831	95.5394	6.40604	6.65064	noncoding	chr4:147979327-148023300-	lincRNA-TTC29-1	lincRNA	43974	chr4	-	147979327	148023300		TGGCATCATCCTTTCTCAGGCCTGCTGTATAGCTTTCATTTTTAATAACATTTGAGTCTA
ASHG19A3L0001649	148.475	154.758	7.13185	7.3577	noncoding	AA777491	lincRNA-C9	lincRNA	568	chr5	+	39255546	39256114		AATCAGTATCTCTCCTTTGTTTCCACTGATGATCTAGGTCACTTAAAGGTCCAAATGTAT
ASHG19A3L0001662	110.412	102.635	6.71238	6.75713	noncoding	AW845646	lincRNA-MAP3K1-3	lincRNA	612	chr5	+	55896358	55896968		TGATGCTTCTTTGGCCTCATTCTTCTCTGGCTTTCAGAGACCAGCCAGAAAATCACACAT
ASHG19A3L0002952	5964.06	5041.58	12.4584	12.3822	noncoding	AK125138	lincRNA-SH3BP5L	lincRNA	3859	chr1	-	249104650	249120832	NM_030645,	TGGTGTGTAAGGGGGAAAGGGTCTTTCCTGGTTTTATTTAAATAAAGTAGTTTATGTAAC
ASHG19A3A049662	6049.99	5679.8	12.4822	12.5572	noncoding	ENST00000420287	RP11-505F3.4	Ensembl	408	chr13	-	73674715	73675123	NM_001444,ENST00000458175,ENST00000457747,ENST00000439042,	TTAGTGGTGGAGTGTGTCATGAACCATGTCGCCTGTACTCGGATCTATGAAAAAGTAGAA
ASHG19A3A052309	182.58	210.851	7.42972	7.8054	noncoding	uc002aqr.1	BC047537	UCSC_knowngene	3969	chr15	-	67697735	67814182	BC047537,	GAGCGCCGTGAAGAAGCGGTTCTGCCGGGCCAGGTCCTGCCAGGGAGCCTTGGAGCAGTG
ASHG19A3A016607	49345.6	49215.9	15.556	15.6176	noncoding	ENST00000433054	RP11-1O7.1	Ensembl	884	chr2	+	174162356	174163240	ENST00000478174,	AAGGAGACTGTATTAACCAAGTCTCCCTATCAGGAATTCACTGACCACTCCATCAAGACC
ASHG19A3L0002245	470.777	509.411	8.78457	9.08863	noncoding	DB567533	lincRNA-AMOT-1	lincRNA	468	chrX	-	113320730	113696298		GATTTACTTTGAACAGTTTGCCTTAAAAACTACCTCCCGAATTTACTAAGGCCTTTTTCT
ASHG19A3L0003505	145.082	163.974	7.09588	7.4396	noncoding	chr15:35025782-35036455+	lincRNA-GJD2-1	lincRNA	10674	chr15	+	35025782	35036455		AAAGATGACAATTATGTGGCACTGCCACAGAAAACCTCACTGTCTCATGCCCTGCAAAGA
ASHG19A3L0002588	176.206	140.995	7.37649	7.22023	noncoding	chr3:65301806-65320211+	lincRNA-MAGI1-6	lincRNA	18406	chr3	+	65301806	65320211		TCCCTCTGACAACCAGCCATCCTTCATCAATTTCCATAGTAATCATGGCTATTTATTCAG
ASHG19A3L0003327	12073.6	8247.89	13.4868	13.0804	noncoding	chr19:22497397-22499384+	lincRNA-ZNF98	lincRNA	1988	chr19	+	22497397	22499384	NM_021269,NM_001080409,NM_001080409,	CTTATGAAACATAAGATAATTCATACTGGGGAGAAACCCTACAAATGTGAAGAATGTGGT
ASHG19A3A027053	126.842	155.663	6.9081	7.3674	noncoding	AK090538		misc_RNA	3438	chr5	-	82320042	82323480		GCATAATGTTTCATTAATTTTTTGCTGACAGATCCTTTCTCTCTAACGTAGCTCTCTGTG
ASHG19A3L0000252	1288.97	954.732	10.2451	9.98408	noncoding	AA564591	lincRNA-PPYR1-2	lincRNA	385	chr10	+	46744329	47220766		AAGAACAGAGACTCACTCTGTCAAGTACACACCCACATCCCTCTTATCCCAAATACCAAA
ASHG19A3A041099	161.854	141.687	7.25675	7.22653	noncoding	ENST00000429601	RP11-368D24__A.1	Ensembl	487	chrX	+	64808277	64820630		GGGAATCTTTTTTGCAAACAAAACTCTGGCCCATTAAGAACTCTCTGCTGCCTTGTGAAG
ASHG19A3A050192	676.339	733.963	9.30926	9.6087	noncoding	uc010tgn.1	XTP6	UCSC_knowngene	1348	chr13	+	50656413	51102670		TGCTTAAGAGGCATCACTGGAATCCTACGGTACCACAGACCAGAGCCTTCCCTTCCCTTC
ASHG19A3A043824	114.89	144.479	6.76719	7.25611	noncoding	ENST00000424719	RP5-884C9.3	Ensembl	338	chr1	-	38546247	38546585		GAAACCCAAAGAGACAAATCTGAAGAGACTCTGGATGAGGGTCCTCCAAAATACATAAAA
ASHG19A3A007941	1316.09	1330.43	10.2727	10.4642	noncoding	ENST00000425294	RP3-471M13.1	Ensembl	312	chr1	-	172855086	172855398		AACACTATTAATGAGTGTGTGGCTCCATACCAAGGAGCTCCCTTTGAGGTGAAAGGGAAA
ASHG19A3A054584	471.408	452.095	8.78641	8.91711	noncoding	ENST00000515084	AC007333.1	Ensembl	1972	chr16	+	52305527	52314201		GTATCCCAGTTCCTCATGCTTGGCCCCAAACCTCTTTTTCACAGTAATAAAGAAAACACA
ASHG19A3L0002544	98.2547	82.0752	6.54786	6.43465	noncoding	BM805159	lincRNA-THSD7A-2	lincRNA	1079	chr7	+	11233008	11424086		CTTCATAAGGATATTTTTCAAGTTTGTGGGCTTGTCCTGGTACCTTCTACTGTGTAGAAG
ASHG19A3L0000059	1717.35	2148.13	10.6623	11.1599	noncoding	chr1:199663652-199681527-	lincRNA-PTPRC-6	lincRNA	17876	chr1	-	199663652	199681527		CACTCCCCCACTGAATCCTAAACCTAAAATGATTTGGAACCAAATTATGATTTGAAGGAT
ASHG19A3L0000599	152.013	154.545	7.16682	7.35565	noncoding	chr13:24122375-24133325-	lincRNA-SACS	lincRNA	10951	chr13	-	24122375	24133325		AGAACGACTTATGTATCAGACTTGGTCCCCTTGATTTTGTCATTCTTCAGTTCTTTTTTC
ASHG19A3L0003257	2993.89	3692.49	11.4589	11.931	noncoding	AK131566	lincRNA-NR4A1	lincRNA	3513	chr12	+	52431498	52453285	NM_173157,NM_002135,	CTTCCTACCCTCCTTCCACATGTACATAAACTGTCACTCTAGGAAGAAGACAAATGACAG
ASHG19A3A015964	1435.27	1460.6	10.398	10.6005	noncoding	ENST00000455863	IGKV1ORY-1	Ensembl	380	chr2	+	91678895	91679403		TATTACTGTCAACAGAGTGACAGTACCCCTCCCACAGCGTTACAAGTCATAACATAATCC
ASHG19A3L0001081	125.445	134.603	6.89131	7.15382	noncoding	CD298737	lincRNA-ZEB2-7	lincRNA	842	chr2	-	145875822	145876453		CCTTCCCCACAAAATGGTTGGCATGCCCCACAAGGATTTTCATTTTATGGCCTTCAATTT
ASHG19A3A020284	469.095	246.808	8.77969	8.03116	noncoding	NR_026963	LOC284900	RefSeq_NR	5125	chr22	+	28315363	28398665		AACCCAAAGTGACACATGCCTGGCGGGATGTTCAGTCTCTGTAAACCCATATGGTTTTTT
ASHG19A3A015745	99.1085	84.2566	6.56113	6.47146	noncoding	ENST00000377977	AC074391.1	Ensembl	1266	chr2	+	65663863	65919319		ATATAATCATCTTTCACATTCGGTTTGACTGTTTGGAGGCTGGAGCCTGTGTACTCCTCG
ASHG19A3L0003450	116.625	118.264	6.78882	6.9673	noncoding	CF129483	lincRNA-SMNDC1-3	lincRNA	602	chr10	-	112160548	112163211		TCCTGCTTCTCCAGTTTTAAGACCAAGACCCAGTTTCAGGCCTATCAATGTCAAGGGGAA
ASHG19A3L0003381	747.979	751.867	9.45596	9.64373	noncoding	chr5:141438289-141445854+	lincRNA-NDFIP1	lincRNA	7566	chr5	+	141438289	141445854		ACCCCTACCTTGAGTATCTCCTCAGACCATATATTCCCCTGGGATTTCCTCTTCATTTTC
ASHG19A3L0000636	192.09	200.095	7.50193	7.72976	noncoding	BE048608	lincRNA-RCBTB2-2	lincRNA	282	chr13	-	49130167	49130440		GACCTCAATTCTCATTGTCAGCTCAATTCCTCAGTTCTCTTCCATGTGATCTCAAGGCTT
ASHG19A3A022387	135.692	180.272	7.00122	7.57778	noncoding	ENST00000414382	AC098973.2	Ensembl	543	chr3	+	27862978	27932792		AAACTCTATAGAATTATGATCTAGGTTTGACTGACTCCTGGCAAGAAGCCCTACCCGCCA
ASHG19A3L0002802	103.888	83.7047	6.62598	6.46083	noncoding	chr6:112269457-112274293+	lincRNA-WISP3-1	lincRNA	4837	chr6	+	112269457	112274293		TTGAAGTTGTTTTACAGATGGGGCAAGTGAAATGTTGGGAGTGGCTTGTCTCTGCTCTTG
ASHG19A3L0000494	603.277	589.805	9.14095	9.29619	noncoding	AA432215	lincRNA-GXYLT1	lincRNA	352	chr12	+	42158024	42159360		AACATAAGAGAAGCCAGGAAAATGCAAGTCCTTCCTCCTGACCCTAGAAAATCTCTGCTG
ASHG19A3L0001091	340.085	325.136	8.31955	8.4359	noncoding	CD357617	lincRNA-RND3-5	lincRNA	749	chr2	-	151610615	151611356		AAATGGAATAACACTAGCACTTTTAAAAACCCTACTTGTTGACTCACCTCCTTTTCCCCA
ASHG19A3L0002483	139.474	143.984	7.04119	7.25063	noncoding	chr1:2952104-2969716-	lincRNA-ACTRT2	lincRNA	17613	chr1	-	2952104	2969716		AAGAAGCTGAGCTACAAAGCCATTTTGTGGAGCTGAGCTGCCTTTCTTTCCATCTACACA
ASHG19A3L0003500	713.428	720.96	9.38889	9.58085	noncoding	AA167479	lincRNA-TMCC2	lincRNA	552	chr1	-	205248383	205248933		GTCCAATGCCAGGGACCTGCGTGGTTGTTGTGGTTTGTGTTCCCTTCCTTTGGCTTTTTT
ASHG19A3L0002521	389.928	410.802	8.51686	8.77576	noncoding	CB219568	lincRNA-TBX3-1	lincRNA	88	chr12	-	115334460	115334548		AAGACATCTAGGCATAAAACCCACACAGCCAACGCTTTGCTCCCTGGCCTCGCTCTGGGT
ASHG19A3L0000844	970.14	341.817	9.8338	8.50612	noncoding	BC009210	lincRNA-KIAA1199	lincRNA	2959	chr15	-	81239669	81282169		GAGGGTGAGACTAAGCCACTTTTCTTATGATACTTTTGTTGAATAAAGGGCCACTTTCCA
ASHG19A3L0000153	1796.74	1754.23	10.7261	10.8679	noncoding	exon100+	lincRNA-CDCP2	lincRNA	251	chr1	+	54592707	54592957		TCTCCTGAAACCATGTACCTCATTCCTCCCTGGATCCGAACACCCCAGCCTGGGTCCTGG
ASHG19A3L0002934	1922.66	2012.6	10.8217	11.0644	noncoding	chr2:192293450-192304436+	lincRNA-OBFC2A-4	lincRNA	10987	chr2	+	192293450	192304436		TTATCAAGAGGGAGAACTCAATCATGGTCCTGCAATGTGTTAGTGCTATCTCCTTCCCAG
ASHG19A3L0002792	227.49	247.072	7.74445	8.03294	noncoding	chr3:140718187-140723779+	lincRNA-SPSB4-2	lincRNA	5593	chr3	+	140718187	140723779		AATAAGTAAGGCTGTTAAGCCTCCAAGCACTTTTCCATGCTGCACTCCACCTAAAGTGTC
ASHG19A3L0000720	196.017	243.897	7.53085	8.01311	noncoding	AI890481	lincRNA-CTAGE5	lincRNA	538	chr14	-	39842524	39843049		GGTAGGTTGCTAATTTTCCAGACTATTATGTCTTCTGGTTTTCCCTCAGTGGCATGCTTT
ASHG19A3A046436	689.681	650.17	9.33976	9.43518	noncoding	uc001nnk.1	AB231722	UCSC_knowngene	158	chr11	+	58746331	58746843		ATCCCTCCTTCAGGTGTATGGCTCTGTGTACCACATAAATCACAGGAACCCCTTCAATAT
ASHG19A3L0002551	83.9109	79.699	6.31292	6.39415	noncoding	chr7:136275537-136279697-	lincRNA-LUZP6-2	lincRNA	4161	chr7	-	136275537	136279697		AAGTAACTTACTTGTTTCTTACTTGATTTCTGATTTCAATTCAAACATCCCCTGGCACTC
ASHG19A3A019001	70956.9	56798.1	16.0979	15.8125	noncoding	ENST00000429327	BX322559.2	Ensembl	192	chr21	-	46796105	46796297		ATACCCATCATAATCGGAGGCTTTGGCAATTGACTAGTCCCCTTAATAATTGGTACCCCC
ASHG19A3L0001038	2686.93	2363.67	11.3056	11.2945	noncoding	BI522654	lincRNA-SLC20A1-1	lincRNA	846	chr2	+	113342057	113372157	NM_032309,	TTTTGAGGCCTTCGAGGAGTGTCTTCGACAGAACGAGGCAGCTGTGGGCAACTGTGCAGA
ASHG19A3A029660	129.342	122.859	6.93562	7.02439	noncoding	ENST00000453558	HCG17	Ensembl	732	chr6	-	30201815	30293911		AGATACAGTTTGGTTGGTCCTTTACCTTCAAAAGTTCAAGTGCTGGCTGCCGAGACTTCT
ASHG19A3A049926	1153.47	1295.48	10.0872	10.4236	noncoding	uc001unz.1	AK093279	UCSC_knowngene	2100	chr13	+	21872311	21906571		TGTCTGCTCACATCTGGTCTGTTCCCCAGTATCCTCACTGTATTAAAGTTGTTTCTTTGT
ASHG19A3A040405	5801.58	4947.78	12.4199	12.3534	noncoding	ENST00000435914	RP1-197O17.2	Ensembl	430	chrX	-	130937339	130937769		TGTGAAACAGATGAGGGCTCGGCAGAACATGCGGGTGTCCAACACTGGCGAGTATGAGAG
ASHG19A3L0000954	4508.62	4963.43	12.0644	12.3576	noncoding	AK293062	lincRNA-GALNT1-2	lincRNA	2194	chr18	+	33161002	33290012	NM_020474,	GCACACTGATGTTTACAAGATTGAAAGAGTCTTTCTCCGAAAATCATGGTAAAGAATACT
ASHG19A3L0003081	127.07	146.696	6.91082	7.2791	noncoding	BU659034	lincRNA-SYK	lincRNA	548	chr9	-	93678708	93679251		TATTGAGCAACATGTTTGGCTTCACAGTAATGTGCCCAGGTAAGTCCCTTACCTCTGTTT
ASHG19A3A026237	183.92	103.285	7.44071	6.76756	noncoding	AF143322		misc_RNA	1415	chr4	+	160057456	160058861		GTTGGTAGTAACTGTATTTTGGCTCTGTTCAGTGGGCCTATAAATTCATTTGATTACATT
ASHG19A3A019260	129385	137872	17.0083	17.0503	noncoding	ENST00000467573	AF064859.2	Ensembl	473	chr21	+	40499493	40499966	NR_002229,NM_000984,ENST00000475608,ENST00000471227,ENST00000453844,ENST00000438478,ENST00000434984,ENST00000431119,ENST00000399511,	GTTCCACTGGCTCCTGATTACGATGCTTTGGATGTTGCCAACAAAATTGGGATCATCTAA
ASHG19A3A043750	794.816	1051.16	9.54605	10.1189	noncoding	NR_003930	LOC387647	RefSeq_NR	2095	chr10	+	29698500	29711299		AGCTGGCCACTTGCATTTCCGTTTCAGTTTATAGAATACATGTTTTGGAAATAGTATCTT
ASHG19A3L0001784	166.762	179.05	7.29769	7.57009	noncoding	DB301608	lincRNA-DUSP22	lincRNA	507	chr6	-	383120	383627		TTCTAATGCTCTGAGGCTCCCATTCAGGAATGCAGTTGATTTTTCCCGTTTCAGAAGCGT
ASHG19A3L0003517	266.615	1372.49	7.97738	10.5098	noncoding	BC150253	lincRNA-SEMA6D-3	lincRNA	5955	chr15	+	47476402	48066417	NM_153618,NM_020858,	CGGCATAAAAAGTAACCCTCAAGTGAAGTGTCTCTATACTGTTTTATAGAGTACTTTAAC
ASHG19A3A009018	96.3944	80.7377	6.51972	6.41183	noncoding	NR_002710	ALOX12P2	RefSeq_NR	2768	chr17	+	6756894	6803667		TAATGTCATCATTTTTAAGCAGCAATGCGTGGCAGCCCCTTTGGTCATGCTGAAGCTTCA
ASHG19A3L0001298	1296.55	899.368	10.2521	9.89658	noncoding	DB341809	lincRNA-CCDC54-2	lincRNA	544	chr3	+	105799683	105800229		TAGAAACACAGCTCATTAAATATTATGTCCAGGCCCACTTCCCTCTTTCTGAAGAACTAA
ASHG19A3A038293	438.205	549.331	8.68325	9.19791	noncoding	ENST00000455592	RP11-165F24.2	Ensembl	494	chr9	+	477855	478349		GCCTCCTGACATCATAGATGACATCAAATCAACAGTGGTGCAAGTAAATATCCAGCTAGC
ASHG19A3L0001828	891.209	873.175	9.71119	9.85568	noncoding	DA428052	lincRNA-UBE2CBP-2	lincRNA	571	chr6	+	83152581	83153152		TCCAATTTTTATTCCATGTAGTTTTCGGGCAAACCCCTACCTCTGCCTTCTCTGGTGTCT
ASHG19A3A049302	126.877	112.458	6.90859	6.89307	noncoding	ENST00000441336	RP11-273F15.1	Ensembl	220	chr13	-	22687257	22687477		GGACATTGAGTTCTTTTAGTTTCCTCTCTGTTGATAATTAACTGTTATTGTTGTCATCCC
ASHG19A3A031149	131.892	151.391	6.96268	7.32676	noncoding	uc003njk.2	BC035101	UCSC_knowngene	2763	chr6	+	27661864	27676935		TTATGAACAAATGCAGGGCTGAGAAACAGCATGGTGGCCTTGACTAAGTTTATGGCGACA
ASHG19A3A014639	823.598	488.036	9.59717	9.0294	noncoding	ENST00000444235	RPL5P7	Ensembl	813	chr2	-	174736380	174737193		CTCACAATACATAAAGAACTGCATAACTCCAGACTTGGTGGAGGAGCTCATGCTGCTGTA
ASHG19A3A050013	174.07	166.767	7.35913	7.46632	noncoding	ENST00000435044	RP11-490N5.1	Ensembl	374	chr13	+	30728202	30728723		ATCTCGTCACGCTCCTAGTTTCCAAGCCCACACACCTGAGGGTCAATGTCCCTTATTGCA
ASHG19A3A016047	92.013	101.592	6.44975	6.74013	noncoding	BC105019		NRED	339	chr2	+	100825111	100865566	uc002taj.1,	CAGTCTCCATTCTCTCTTCAGGAAAGAGGCCTACTCGCAGATGAACGCACCAAGGCTCAG
ASHG19A3L0001707	83.1592	69.0879	6.29922	6.19073	noncoding	BM912149	lincRNA-RFPL4B-2	lincRNA	1116	chr6	-	113694302	113694821		TTAAGGTCAACATTCAGAGTCTACTGTGCTCTCTTACTTGGGCTCACCTGAGAGCATCTT
ASHG19A3A044131	337.368	297.276	8.30963	8.30436	noncoding	uc001jxd.1	AK023445	UCSC_knowngene	1860	chr10	+	77056147	77121436		ACTTCTTTATGAAGGACTCCAGCCTGGTGGAGATGAATGAGTCCTGAAGATGGAATCGAA
ASHG19A3L0001308	371.342	403.835	8.44683	8.75084	noncoding	exon2751+	lincRNA-TPRA1-4	lincRNA	101	chr3	+	126878038	126878138		ATGCAACAATTACTGGGAGGACAAAATGAGGGAAGGTACCAAAGCAGCCCCCTTAACCCA
ASHG19A3L0003233	124.481	113.732	6.8807	6.90831	noncoding	CU692690	lincRNA-TNFRSF13C	lincRNA	1342	chr22	+	42120333	42423168		CCCCCGGAACGAGAAGGAAACACCCCCGGACAAACCCTTTTCTTCAAATTTTATAAAAAA
ASHG19A3L0000396	535.648	719.41	8.9721	9.5776	noncoding	DB036467	lincRNA-TPCN2	lincRNA	579	chr11	-	68999680	69002403		AAGGCTTAAAGCCGCACTCCACACCTAGGCCTGTGACACCTCCCACAAGCTTCTTCACCT
ASHG19A3L0001622	1107.94	1147.5	10.0296	10.2526	noncoding	chr5:172618919-172633619+	lincRNA-NKX2-5-1	lincRNA	14701	chr5	+	172618919	172633619		ATCAGGGACACCAAATTCTTAACCCTGTGACTGCCCCTCTAGAGAACATCCTTTCATTTG
ASHG19A3A014315	848.368	901.298	9.63941	9.9005	noncoding	AK128224		misc_RNA	3579	chr2	-	129133041	129136621		TTCAGAAAAAATGGAATTCTAGCCCAGGCATACTCCCCACAACACATTCAGGGCTCCAAT
ASHG19A3L0000067	85.2612	84.6826	6.33324	6.47895	noncoding	DA430048	lincRNA-PLXNA2-1	lincRNA	563	chr1	+	208132362	208139352		AATAAGGAGAGACAACTCAGCATCCACCCTGCAGTGAATAATAGAACAAAAAGCTGCCGG
ASHG19A3L0000343	1099.4	916.466	10.0186	9.92275	noncoding	CV346902	lincRNA-TMEM45B-1	lincRNA	589	chr11	+	129596130	129596709		GCATTTTTAAAACTTCCATCCAGTCCTGCATCGTCTTCCTCCTCAAAACTTTTTCAGAGG
ASHG19A3L0000633	303.618	180.358	8.15996	7.57851	noncoding	BQ045000	lincRNA-NUDT15-1	lincRNA	615	chr13	+	48578770	48611972		CAGGAGTCGGAGTCGGAGTCGTGGTGACCAGCTGCAAGCATCCGCGTTGCGCCTCGTGCC
ASHG19A3L0003054	207.878	230.483	7.61594	7.93236	noncoding	chr8:48104990-48105990-	lincRNA-POTEA-2	lincRNA	1001	chr8	-	48104990	48105990		AGTGACTACTGCTGTAATTGCTTAGGCTGCTGTTAGTTTCTCTTAATCAAAATTACTATG
ASHG19A3L0002380	282.249	246.849	8.0566	8.0315	noncoding	chr1:108595980-108600811-	lincRNA-VAV3-1	lincRNA	4832	chr1	-	108595980	108600811		CAAAGTTCTGTTTGGAACCATGAGCCCAATTAGTTTCCTTCTTCTCATCCCTGTGATACC
ASHG19A3A050759	106.404	80.0876	6.66085	6.40017	noncoding	uc001wxl.2	BC084561	UCSC_knowngene	2301	chr14	-	50504312	50507947		AATATGACCTGAAGCAGATGGATGCACTCACATAAGAAACATCACCTGTGGCCTTCATCG
ASHG19A3L0002922	71.7751	75.6133	6.0857	6.31919	noncoding	chr2:192408439-192420559+	lincRNA-OBFC2A-1	lincRNA	12121	chr2	+	192408439	192420559		GGAATATGGTTATTCTTTGAGGACCCTCTGTTTTATGGCCCAGTACTTGTGCTAGTCACA
ASHG19A3A051551	170.725	133.736	7.33143	7.14426	noncoding	AJ431608		misc_RNA	349	chr14	+	69077966	69078314		TGCTTCCTTGTCCCTTTCAGCAAAGGATGTCATGGTTTTACAATGTCTCCAGTGAAAAAG
ASHG19A3A015656	96.2212	109.323	6.51658	6.851	noncoding	ENST00000422521	AC008280.5	Ensembl	1115	chr2	+	54198244	54293184		GAAGTCATGCAATTTTTATTTGTTGTGCACTTATTTTGTACCAATCACTCTTCCAACCAC
ASHG19A3A031718	164.406	143.107	7.27883	7.24103	noncoding	uc003pgq.2	AL832252	UCSC_knowngene	3358	chr6	+	73977773	74001059		AATCTGTTGGATGATTACAACATTGCTGGATTGATAGCAGCCTCACCTGCCAGGCTCAAA
ASHG19A3L0002925	115.81	131.758	6.77888	7.12485	noncoding	BG260387	lincRNA-KRR1	lincRNA	749	chr12	-	75957052	76377795		TATATAGGAATCAAAGCGAAGCGTTGGAGTAGATGCCGAGATCACTCTCCTCAAACTCTG
ASHG19A3A035094	80.5504	131.879	6.25252	7.12585	noncoding	ENST00000436379	AC009365.4	Ensembl	751	chr7	+	132443729	132445392		TGTCTTGTCTCCCAGACTCAGATACAAGCCCATCAAGGCAGTGAGGTTGACATCTTTTTT
ASHG19A3L0001179	152.16	128.576	7.16832	7.09084	noncoding	chr2:3172193-3185593-	lincRNA-MYT1L-1	lincRNA	13401	chr2	-	3172193	3185593		TGTAACACAGCTCCGCTTCCTCTCTGGAATGTTCCAATGTTCCATAAATTAGTCAACGCC
ASHG19A3A016792	128.31	153.518	6.92474	7.3466	noncoding	uc002uwa.2	AOX2	UCSC_knowngene	978	chr2	+	201635394	201658962	NR_001557,	ACAAAATTCCAACCATCACTGATGTCCCAGAGGAGTTCAATGTCTCCTTGCTGCCATCAT
ASHG19A3A029224	333.626	297.301	8.29405	8.30479	noncoding	ENST00000457776	RP11-423O2.6	Ensembl	1746	chr1	+	142803531	142827235	uc011abu.1,ENST00000430699,ENST00000416817,	CAAAGAAAGAAAGATTGGGAAAACGTATCCTCAGCAATTTCCCAAGAAACTGAAGGAAGA
ASHG19A3A020948	84.523	82.9705	6.32237	6.44858	noncoding	ENST00000447834	RP11-141M3.3	Ensembl	2134	chr3	-	42975743	42978277		ACAAAAAGCTCTCCATTCACGAAATAGCGGTAGAATTGCATCCTGGTTCCAGACCATGGA
ASHG19A3L0001845	55.104	83.5788	5.69851	6.45883	noncoding	BU622891	lincRNA-ATXN7L1	lincRNA	589	chr7	-	105564086	105564659		ATTCCGAGTCACAACAGTTTGAGCCATGAAACAGAAAAACCCATGACTCCTTCTGCTGCT
ASHG19A3A050458	187.527	157.281	7.46632	7.38134	noncoding	AK054588		misc_RNA	1826	chr1	-	118382256	118384393		TATTTTTAGGCCCTTATCCTTAACCTTGCAGAAGAGTCGCTTGTGTTCCTGTCTTGGGTC
ASHG19A3L0000855	1215.52	1490.77	10.1638	10.6263	noncoding	AA587541	lincRNA-MEF2A	lincRNA	441	chr15	+	99976938	99977379		ATGAAGAGAGCCCTTCCCTCCCTGGCACTAGGCTGAGAGGGTTGGCTCTGGAAGTCAAAT
ASHG19A3L0001436	95.2309	114.491	6.50082	6.91819	noncoding	BX100522	lincRNA-TET2-3	lincRNA	467	chr4	-	106093667	106274038		TAGCAAATTGCATAGCGTTTTAAACACTGCAACCTGACTTAAGAGAGAATCCCCCTGTAA
ASHG19A3A052796	8477.44	6756.84	12.9759	12.801	noncoding	NR_026757	LOC729082	RefSeq_NR	1894	chr15	+	41576200	41591794	ENST00000500949,	TCCAAATCAGCAGAGGACCATTGTATGTATTGTCAGGTCTTTATATAAGAGTGAAACCTT
ASHG19A3A032464	241.778	118.031	7.83253	6.96423	noncoding	ENST00000451066	AC009473.1	Ensembl	692	chr7	-	7989483	7990340		GCTCCCACTTAGAGACTGCAATGTAAGGTATGGAAACAGAATATTCTCTATAGAAACATA
ASHG19A3A025135	687.52	579.268	9.3353	9.27025	noncoding	ENST00000514008	RP11-2H3.2	Ensembl	125	chr4	+	387322	387447		TCCTGCCCAGCAGAATTTATATAGAGATGTGATGTTGGAGAACTTCAGAAATCTGGTTCC
ASHG19A3A028579	117.462	149.562	6.79928	7.30979	noncoding	AJ227862		misc_RNA	457	chr5	+	102118475	102118934		AGGAAAATTGTATGTCAGGGTGTATTTCTGTGTGGGGTTGCAAGGGCAGGAAAGAAAAAA
ASHG19A3L0003490	229.723	243.89	7.75806	8.01303	noncoding	DB349331	lincRNA-CTNND1	lincRNA	556	chr11	-	57603513	57604068		CTGTACTTTCTTATTTATTTATTTAAAGATGGGGTCTCACTCTGTCACCCTAGCTATGCA
ASHG19A3A049213	89.8864	65.2823	6.41329	6.10801	noncoding	uc001ujx.1	EP400NL	UCSC_knowngene	4335	chr12	+	132602690	132613429		TGCTGTCAGATACTGGGAGAGCTGGGCTTGACTTTCTTTGCGTTTGCGGGAGGAATGCCC
ASHG19A3A050856	1582.82	1469.03	10.5432	10.609	noncoding	ENST00000508827	AL355916.1	Ensembl	5103	chr14	-	62023037	62037371		TTTACAGATATTTATAGGACAATTTCCCTCCTGAGAGTGCCCAAGCATGGGGGATGGTGA
ASHG19A3A018502	94.6129	146.287	6.49176	7.27502	noncoding	BC002831		misc_RNA	1013	chr20	+	57209827	57210789		CTTCCCTATTCCATCCTTTGATGGGTGGCCTGTTACACGTTTGGAAATAAAAACAAGTGG
ASHG19A3A022957	236.116	215.323	7.79767	7.8352	noncoding	ENST00000460269	MT-ND5	Ensembl	1703	chr3	+	106617735	106619438		ATTTTAGCCTCCACCATTGAATCTACCCCGAAAGGCCTAATTAAACTCTATTTTTTCTCC
ASHG19A3L0002780	153.613	140.766	7.18169	7.2176	noncoding	chr15:56088155-56092624+	lincRNA-NEDD4	lincRNA	4470	chr15	+	56088155	56092624		TCTGGAAAAAATGCTGCCATATTGTCCCGCTCTGGAGTCCTTCAAGCCTGAATGAAAACA
ASHG19A3L0002511	107.917	77.6013	6.68192	6.35797	noncoding	chr1:90504105-90519020-	lincRNA-ZNF326	lincRNA	14916	chr1	-	90504105	90519020		CACTATGCTGCCCCAAGGAATTACATTTTTATTTGTGTCAGACACGTGAATGTTAAAAAT
ASHG19A3L0000793	340.878	268.672	8.32288	8.15483	noncoding	BE727398	lincRNA-TCL1B	lincRNA	971	chr14	+	96108384	96109176		TAGCAATCCTGTTAAAGACCTATTCCTGGCTCTTGCTCCTGGTCTGATGGAGTTGATGAA
ASHG19A3A019133	330.264	155.558	8.2807	7.36593	noncoding	ENST00000429843	AP000240.7	Ensembl	406	chr21	+	30868366	30872706		TTGTTATCACAATAATTTATAGCCAGGATGCCTCTTCCACCTGAGAGTGAGCTGCCTGAG
ASHG19A3A037608	264.141	259.814	7.9627	8.10478	noncoding	ENST00000424980	RP11-375O18.2	Ensembl	328	chr9	-	82120718	82147257		GCTTCCGTGCCCAACTTAGAACTACACATCTGCTGCCTCTTGGTAACATGTCATTATAAG
ASHG19A3L0000921	209.526	146.825	7.62838	7.28027	noncoding	chr17:55283426-55307276+	lincRNA-MSI2	lincRNA	23851	chr17	+	55283426	55307276		ACTCCGCTAAATCCCTGGACTAAGAATTGTTAATTTTTCTGCTTATTCACTGATGCTCTT
ASHG19A3L0003183	52.4468	95.98	5.62882	6.65718	noncoding	chr13:99325739-99331929-	lincRNA-STK24	lincRNA	6191	chr13	-	99325739	99331929		CTATGTAAAGTGCTTGGACTTGGCTCATTGAAGTGCTCTTAGATGCTCCAATGATAGTAT
ASHG19A3A014158	57890.3	60454.3	15.7983	15.9047	noncoding	ENST00000359165	EEF1A1P12	Ensembl	1341	chr2	-	107313786	107315132		GTGATATGAGACAGATAGTTACAGTGGGTGTCATCAAAGCAGTGGACAAGAAGACTGCTG
ASHG19A3A026064	437.52	345.449	8.68104	8.52277	noncoding	AK097799		misc_RNA	1756	chr4	+	140099193	140100951		ACTGCTGTTGCCTCTATTTTCTTGGGGGTGAGTCTTCTCTTCCTTTCTTAAAAAGCAACT
ASHG19A3A027423	292.251	235.737	8.10758	7.96325	noncoding	ENST00000509530	CTC-276P9.3	Ensembl	541	chr5	-	134460069	134466939		ACTGTTAAGCTCATGTTTCCTCTCCTGTTGCAAACAATTGTAAAAATGATTGGTATCTGC
ASHG19A3A029661	282.49	266.774	8.0574	8.14468	noncoding	AL049252		NRED	3343	chr6	-	30268570	30271892		AGAAAAGAGCACCTCCTCATTTTAGAGTACATGGTGTGAACTCACTCTCAGCTGCCAAGT
ASHG19A3A027248	607.11	427.269	9.14973	8.83479	noncoding	AB002448		NRED	1270	chr5	-	114539717	114540652	ENST00000507241,	GGATTTATGCTTTAAAAATATTGGTAGTTACTGCCAAGAATTGCCATCCAGAAACAGTGT
ASHG19A3L0002480	5086.9	2663.63	12.2337	11.4672	noncoding	BC037864	lincRNA-CD247	lincRNA	4577	chr1	+	167391146	167395664		TTTGTATGTTTTGGGTGTGTCTATGTATGTATTAACATAACAGTTTTCACTGCCTAGGTG
ASHG19A3L0002977	68.1257	102.06	6.01097	6.74835	noncoding	BM956062	lincRNA-PGS1	lincRNA	174	chr17	+	76360558	76360732		AAAGGAATGAAGACGAAAACGTTTCTGAAAATGTGGGTGGAGACACCTGGGCCTTTACAG
ASHG19A3A030139	319.165	222.238	8.23144	7.87895	noncoding	NR_027005	C6orf147	RefSeq_NR	1444	chr6	-	73983861	74020088		AAAGCACTGATGGTTTCAGAATGTGCCTAAACCTGCACCAGTGAGGCAAGTATGCAAAAG
ASHG19A3L0000533	778.053	642.042	9.51653	9.41874	noncoding	BX093893	lincRNA-GLIPR1	lincRNA	464	chr12	+	75841430	75841894		TGCAATATCTCTCCCTAGTTTGCCATTTGCCTTAATATTTGCCTATGATGCTGTTTAGAA
ASHG19A3L0002574	395.755	201.306	8.53853	7.73806	noncoding	AK293938	lincRNA-ZNF638	lincRNA	3515	chr2	+	71503742	71622817		CTTCAAAAGCTGTTGAAATTGTTACTTCAACTTCTGCTGAGTCGGTGGATCAGACTCAGC
ASHG19A3L0002131	327.859	329.602	8.27144	8.4543	noncoding	BE093687	lincRNA-IL7-1	lincRNA	164	chr8	-	79767145	79767276		TAAAATGAATGTTCATAGTGCTTTCTCCCAGATAAGATCCCTTGCTAAGCACTTCATTTA
ASHG19A3L0000420	271.604	288.461	8.00327	8.25893	noncoding	chr11:93702877-93731152-	lincRNA-C11orf90	lincRNA	28276	chr11	-	93702877	93731152		CATAAATCTATGTCTTGCTGCTCTTTTCATCCAGTTCTCCTTACTTTGCCAGGGTTTTAA
ASHG19A3A027359	190.859	157.331	7.492	7.38195	noncoding	ENST00000442687	AC034228.7	Ensembl	1578	chr5	-	131142923	131281198		AAGAAAGCAATGCAGGTAGAACAGTTTAGTTCTGCTGCCTCAGTCCCCAAAACCTGCATT
ASHG19A3L0000163	121.395	111.418	6.84433	6.87818	noncoding	FN113698	lincRNA-NFIA-2	lincRNA	61	chr1	-	62021324	62021386		TATTAAAGAATGATGCCAGAGTGCATCTTCCGTAGTAGGTCCTGTGCTGTGTAAGAATCC
ASHG19A3L0003224	146.196	129.562	7.10784	7.10171	noncoding	CN479707	lincRNA-RBFOX2	lincRNA	678	chr22	-	36478420	36479080		GGGGCATGTGCGTGCTTCCTGGGACATTCATTCAACTTTGCTGCTTGTTTGAAAATTTTT
ASHG19A3L0002060	5427.8	5355.49	12.3265	12.467	noncoding	BX953928	lincRNA-DOK2	lincRNA	442	chr8	+	21714378	21714822		GAATCCAGACTCCATCCCAGAGCCTCCCCACCTCCATCAGGAATCTGCTCTCAGCCTGAC
ASHG19A3L0001581	578.624	343.751	9.07918	8.51512	noncoding	AX748201	lincRNA-MARCH3	lincRNA	2633	chr5	+	126187125	126189758		TTTTGCTCATCTGTCTAGATGTTTTTCTTCCCCTGGGCCATGGAGGGCTTTGTTTCACAA
ASHG19A3L0002859	254.549	214.014	7.90991	7.82717	noncoding	chr6:105939837-105951212-	lincRNA-PREP-2	lincRNA	11376	chr6	-	105939837	105951212		TTTTAGTAGTGGTTATGAAGGTGATGCTTTCTGCCAGAACTCAGACTGTTCTTGAGTGCT
ASHG19A3L0000508	133.216	91.1808	6.9756	6.57974	noncoding	chr12:55389508-55403008-	lincRNA-KIAA0748	lincRNA	13501	chr12	-	55389508	55403008		TTAATCCAGAGCTGTTAGGTCTCTGCACTTATGATTGTGCTGGTTGTTCCTTGCACAAGG
ASHG19A3L0002599	466.31	444.071	8.77109	8.89192	noncoding	AV651118	lincRNA-A2ML1	lincRNA	681	chr12	-	9065961	9066642		CTCTGTCAATCCACTCTTCCTTTTCTCCTTTAAAAGCCCATGCATGGTTTGTTTATTGAG
ASHG19A3L0003213	74.1633	95.6609	6.13359	6.65204	noncoding	BU664763	lincRNA-GSDMC-2	lincRNA	390	chr8	+	129185278	129185668		TCTTTTGTCTCTCCAAAGACAACCAAGGGTGAAGGGCTCTCTGTGTATCTTTCTAGACAT
ASHG19A3L0001470	460.601	519.326	8.75394	9.11489	noncoding	chr4:15911552-15921927-	lincRNA-CD38	lincRNA	10376	chr4	-	15911552	15921927		CAGTGTCCATCAAAGTAGAGATGGCTCCCCTCACTTGGCAAGCCAGGACTTTGATTTTTT
ASHG19A3L0002931	545.714	615.144	8.99613	9.35315	noncoding	BF352825	lincRNA-DYRK2-2	lincRNA	324	chr12	-	68315048	68315360		GGACATGCATCAATCAATGTTGGTTTGTTTCTTCCATCTCTTGCTCTTCCTAGCCCCACT
ASHG19A3A000194	134.62	154.893	6.98945	7.35955	noncoding	ENST00000429281	RP11-265P11.2	Ensembl	673	chrX	-	39164887	39186615		TGCAGTGGACCCTGTTGCCTACCCGAGTGAAGATAAGAATACCTATTTTAAAGTTCTGTT
ASHG19A3A055303	455.244	385.147	8.73726	8.68138	noncoding	uc010txe.1	MEG3	UCSC_knowngene	1760	chr14	+	101292444	101327368		GAAAAACACACTGATTATCATAATGAGCAGGTTCCCAGTGCCCCCGACAAGCCCCTGCTG
ASHG19A3L0001027	96.4623	65.4896	6.52063	6.11261	noncoding	chr2:102880643-102894318+	lincRNA-IL1RL1	lincRNA	13676	chr2	+	102880643	102894318		TCACAATTATTATAGATACTACCTGCTTCATCAACCCAGGGAGCTCAGGAGTGTTGCCAC
ASHG19A3L0001606	763.646	868.628	9.48854	9.8493	noncoding	BF515427	lincRNA-IL12B-2	lincRNA	478	chr5	-	159031098	159031576		TGCTGTAATAATTCTATGTAGCAACAACCCTCCTCCCAAACCTCAATAGCTAACAAAAAA
ASHG19A3L0002752	10378	9695.05	13.2729	13.3155	noncoding	EC495588	lincRNA-RCN2	lincRNA	90	chr15	-	77271632	77272065		ATTCCGGGTAGTCTGCAGTCCCCAGATCTCGGACACATCTGTGGTGCTGTCCATGGACAA
ASHG19A3L0001579	356.504	416.382	8.38698	8.79594	noncoding	exon3076+	lincRNA-GRAMD3-1	lincRNA	926	chr5	+	124747215	124748140		AGTACAGGCAAGTTCCCCAGACTCCCAAGCGTTTCTCTCCCATTAGGAGACATTTTAAAA
ASHG19A3A025860	740.082	709.405	9.44119	9.55818	noncoding	ENST00000506148	RP11-556I14.1	Ensembl	472	chr4	+	105828513	106038002		TAATGCCTCTCCCTGGATACTAAATTTACTGACCCTGCCTAGGACCGAGAAGATTGATGA
ASHG19A3L0000539	370.104	294.173	8.4406	8.28828	noncoding	CF594357	lincRNA-RASSF9-1	lincRNA	801	chr12	+	86099664	86100435		TTTTTGTTTGGTTTGGTTTTGGTTTTGGTTTTAGTGGAAGAGTTAAATAATGGGCAAAGA
ASHG19A3A046567	139.895	119.403	7.0445	6.98152	noncoding	ENST00000428947	AP001187.11	Ensembl	411	chr11	+	64649006	64649417		TATTACCGGAAATAAATGGATGAGGCTTCCAAAAGGACCAGAGGCATCCTCATCCAGCAT
ASHG19A3L0001641	92.0477	65.7213	6.45078	6.11794	noncoding	chr5:3565525-3579100+	lincRNA-IRX1-1	lincRNA	13576	chr5	+	3565525	3579100		ACATCATGTCTTCCAGGGCTACCTACAAGAGGGTGACATTTTACCATAGAAACTCCATGG
ASHG19A3L0001012	212.55	231.712	7.65041	7.94072	noncoding	AI638100	lincRNA-ADCYAP1	lincRNA	379	chr18	-	999612	999875		TCTCGTATTTCCTTGATCTTGCATCCACCTTTTCCAATGAGAGAGCCACACTGACTAGCA
ASHG19A3A029251	731.77	431.838	9.42282	8.8523	noncoding	uc001eiw.1	CR936796	UCSC_knowngene	4096	chr1	+	142618798	143257763		GGCAAAGGTTCAGACATACGACGTTTGTTTTTAAAATCTTTCTACAGCCTTGTATCCTTT
ASHG19A3A018644	353.205	70.5757	8.37359	6.21981	noncoding	ENST00000449602	AJ006998.2	Ensembl	1000	chr21	-	16742840	16774624		TTGCTATAAAGAGTAGGCAAATGGAAATCTTTCCCCAAAGGGCACACTGGGATTGTTAGG
ASHG19A3A016181	1599.31	1704.98	10.5573	10.8227	noncoding	ENST00000449539	AC068491.3	Ensembl	1241	chr2	+	112141328	112142569	ENST00000398171,	GTAACTGGGTATGTGAAGTTCTGTTCAGTTCTGGGGGGAAATTTATTCTGAGTTGTGCTG
ASHG19A3A043334	1310.11	1137.06	10.2656	10.2385	noncoding	uc001lcv.1	DQ596646	UCSC_knowngene	2195	chr10	-	118588285	118590480		AGGCAACTGGTGTTTCTGCGAGAATGGAATGGAATGTGGTTGAAATTTTGTGTTGTTTTT
ASHG19A3L0001529	618.448	650.817	9.17435	9.43696	noncoding	DB330880	lincRNA-THAP6	lincRNA	548	chr4	-	76469711	76472540		TGGGCTCAGGGCAATCTCATCTCTTCTTTTTTCTCCTGCTCACACCCTTTGTCTAAAAAA
ASHG19A3A032650	192.259	197.186	7.50334	7.70607	noncoding	BC068090		misc_RNA	1322	chr7	-	32953392	32954696		CACTCACGTCTTCAAACTCTTCCTTTCTATTGTGATCTTGCCCCAGTATTTAAAAATTGT
ASHG19A3L0002708	321.955	130.567	8.24434	7.11149	noncoding	chr16:74903295-74907270-	lincRNA-FA2H-2	lincRNA	3976	chr16	-	74903295	74907270		CTTAAACATGTAAGTGCTTACACCAAAATGTGCTGTTGGCCTCCGAGGAAAGAAGGAACT
ASHG19A3L0000922	942.873	857.912	9.79235	9.83316	noncoding	AA594021	lincRNA-GNA13	lincRNA	359	chr17	-	63099542	63099901		CTCCCTCTGACCCCATGAAAAGCTGTCATTTCCTAGGTAACTGGAGTTGCAGACAGCACA
ASHG19A3L0000168	1008.82	1261.73	9.89489	10.39	noncoding	BE091553	lincRNA-LRRIQ3-2	lincRNA	192	chr1	+	73033756	73033934		TGTAGAAAACTAATTCTGATTAGCACTAAGATTAGTCATTCTAGTCTCCCCGGGATACAG
ASHG19A3A040745	400.779	413.379	8.55541	8.78576	noncoding	ENST00000449605	RP11-147O5.1	Ensembl	7619	chrX	+	21911717	21920026		TTCTTTCATTCAAAGACAGGACTTACATGAGCCTTCCTTTCTGCTGTTCCTTTTCTTAAA
ASHG19A3A041285	1699.76	1178.36	10.6506	10.2896	noncoding	ENST00000395772	EEF1A1P15	Ensembl	1352	chrX	+	97644507	97645918		ATCATGGCAACATTGCTGGTGACAGCAAACATAATCAACCAATTGGCTTCACTGCTCAGG
ASHG19A3A027913	139.076	105.889	7.03598	6.80335	noncoding	uc003jei.2	BX648541	UCSC_knowngene	3239	chr5	+	8457803	8463208		GAGACAGGCAGGCCAGATATTGGTTACTTTGATTTTAGTTGACAAAGTTTATTTGCTTTT
ASHG19A3A039320	743.05	1299.15	9.4471	10.4268	noncoding	ENST00000423122	RP11-65J3.1	Ensembl	545	chr9	+	132104121	132121817		TTCTTTCCCTGAGGACCATCTGGAGTGGACGCGTGCACTACCCCTCTCTGAATACACCCT
ASHG19A3A018101	91.3834	117.739	6.43885	6.96003	noncoding	ENST00000412571	RP1-122P22.2	Ensembl	415	chr20	+	19738791	19789926		TCGTCTTTGGGGCCACCGGTCGCCCCCGCCTCCGGGACCTGCGGGGAGGGCCCGCGAGAG
ASHG19A3A020788	40130.9	38323.7	15.2402	15.2799	noncoding	ENST00000393779	AC104297.1	Ensembl	870	chr3	-	17913220	17914090		AATCTGCCTGCACGGTACCAACAGATGTGGATAAGTGGTTCCATTACCAGAAAAACTTAA
ASHG19A3A035845	69.7746	64.9379	6.04608	6.10159	noncoding	uc003xyc.1	AK055514	UCSC_knowngene	2367	chr8	-	69824037	70016425		TCCTTCAACTAAGGCTGCAAATTGAAAATGTGAAGAACCTTGCCTGCTTGAACCAGCCTG
ASHG19A3L0002946	129.49	100.598	6.93702	6.72614	noncoding	CD557263	lincRNA-GABRP-1	lincRNA	870	chr5	-	170279763	170280597		TAGAGGTTTACTGTCAGGCCAACAGTTATGAAATGGTGCTACTCCACTCTTTCCTTACCC
ASHG19A3A017605	432.265	409.107	8.66446	8.77056	noncoding	NR_023919	HSPC157	RefSeq_NR	1039	chr1	+	22352041	22357713		TTCCTGGAGTCATTTGTGGGAGTTAGGGTCTTATCCTGATCTTTCCTCGTCCCCCGCTCC
ASHG19A3A009287	3840.06	3432.13	11.8316	11.8214	noncoding	AK093982		misc_RNA	2269	chr1	-	197473880	197476148		TCATCTCCAAACTTGACTACTATTGGGAAGATGTGTATAAAAGCATCGCTTTGGGAATTT
ASHG19A3L0003166	172.051	158.508	7.34211	7.39301	noncoding	DB068418	lincRNA-SERP2-4	lincRNA	534	chr13	+	44482804	44596796	NR_026955,ENST00000439707,	ATGAAGACTCTGCTCCTGGATCAGGAATGCTTTTTTGTCCCTGTTTTTGGATTTTCCACC
ASHG19A3L0001363	136.002	195.042	7.00497	7.68932	noncoding	BQ187752	lincRNA-ATP13A3	lincRNA	642	chr3	-	194197527	194198173		TGTTGTGCGTTTGTAGACTTCAAACTTTGCTAGTGAGAGGCTGCTTATATTATTATCTAG
ASHG19A3A040708	103.053	79.4392	6.61456	6.38952	noncoding	uc004cxd.2	BC032506	UCSC_knowngene	2419	chrX	+	15719056	15721475	AK095608,	AATTGGTTGCGACTTTTTTGTCTCTTCCCGATTCTGGCATTCCAGAGGGTCAATAGGTTC
ASHG19A3L0002630	50.8952	88.6617	5.58591	6.541	noncoding	AI061264	lincRNA-ZNF592	lincRNA	436	chr15	+	85288681	85289117		CTTTTAAAAGCTACTTAAAGATACCATTTCCCTGCTTCCAGGAGAAATATACATGCACTA
ASHG19A3A010250	320.153	326.376	8.23598	8.44135	noncoding	uc010dmv.2	DM004440	UCSC_knowngene	109	chr18	-	33484780	33484889		CCCGGGCGCTGCTCTGACCCCTCGTGTCTTGTGTTGCAGCCGGAGGGACGCAGGTCCGCA
ASHG19A3L0000830	306.84	367.635	8.17513	8.61882	noncoding	BM982048	lincRNA-STRA6	lincRNA	667	chr15	-	74510857	74513896		ACACTGAGCCTTGTCTTCCGCTTCCTTCTCATTCTGGATCATCTTGATTATTGCATTCCT
ASHG19A3L0000623	84.5313	101.064	6.32251	6.73228	noncoding	chr13:42065250-42122000-	lincRNA-C13orf15-1	lincRNA	56751	chr13	-	42065250	42122000		ACTCCAAACTGTGACTGAGTCCACAGCCCATTTGCCCTTAAGTCATTATCCAAAAGAAGC
ASHG19A3A044610	229.476	213.812	7.75637	7.8263	noncoding	ENST00000448347	RP11-282I1.1	Ensembl	831	chr10	+	125115965	125277224	uc001lhg.1,	ATGCTTGAAAATAAATGGCACCTGTGGAGAAAGTGCCCCATCCCTGATTATGTCATCGGA
ASHG19A3A049547	225.708	204.629	7.73362	7.76221	noncoding	ENST00000433480	RP11-305D15.2	Ensembl	829	chr13	-	48870962	48877797	uc001vca.2,	TAAAATACAGTTGTGCTGTGATGTAAATCCCCTCATCCTGGAGCAGCTGAGCAAGGTCTA
ASHG19A3A014527	145.674	75.574	7.10277	6.31851	noncoding	ENST00000442666	AC005042.4	Ensembl	825	chr2	-	159535167	159591330		TGGACCCCTTACTGTGTTAACTGCTAATCAGCCTTCTGTAAAAATGATATTGCAAATTCA
ASHG19A3A023900	662.793	951.528	9.27974	9.97773	noncoding	ENST00000515205	RP11-539L10.3	Ensembl	422	chr4	-	6672451	6675557		GCTAGTTTAAGGAAATATCTGACGCTGATAACCATGTCCCAAGCACTGCTCTAAGTTCCC
ASHG19A3A034008	169.221	175.351	7.31761	7.53859	noncoding	ENST00000425071	AC010082.1	Ensembl	471	chr7	+	18191397	18367235		AACGACAAAGGCTGTGAATCTGCATCCTAGTCTTAGCAGTCCCTCTGATTCTCATGATGA
ASHG19A3L0000069	3023.68	3350.61	11.4765	11.7814	noncoding	chr1:212300402-212317702+	lincRNA-PPP2R5A	lincRNA	17301	chr1	+	212300402	212317702		CTGTGTGGCTTCTTGGCTGGATTCTCTGTGTGTGTGTCCCCTCTCTTCCTGATTAGTCTA
ASHG19A3L0000871	794.839	2251.33	9.54609	11.2268	noncoding	AA782034	lincRNA-CDH11-3	lincRNA	196	chr16	-	65808988	65809184		AATTCCGTGCACCATTAAGCTTCAAAACCCATTCCATTCGCACTGAGCAGGTGTGGTTTT
ASHG19A3L0000115	108.186	96.7758	6.68495	6.66803	noncoding	AK292905	lincRNA-PHC2-1	lincRNA	3360	chr1	-	33790174	33896216	NM_198040,NM_004427,	ATTCATCCGCTCTCTGCCAGGCTGCCAGGAGATAGCAGAGGAATTCCGTGCCCAGGAAAT
ASHG19A3L0002753	827.889	1620.47	9.60471	10.7491	noncoding	BG977395	lincRNA-PSTPIP1	lincRNA	207	chr15	+	77271788	77271888		TTCATCTCAGAGATCTCAGTCTTTGTGCGCCGCAGGTCATCCCCTGTGCTTCCCATGCCA
ASHG19A3A000478	12023.2	10683.2	13.4796	13.455	noncoding	ENST00000510145	CTD-2340E1.3	Ensembl	944	chr5	-	101944859	102007263		TGTTCCTATTCGGCCATCTTGTCTCCTCCCGTGAACTGGAAATTCCCTGTCTCCCCTTAA
ASHG19A3L0001007	54.6503	74.1565	5.686	6.29082	noncoding	DB451083	lincRNA-SALL3-2	lincRNA	481	chr18	+	76277624	76278269		AAGTGGCATTTTCCACAAATGGCTCCACTGACATTTCCTATTCTTTTGTATTTTGCTGTA
ASHG19A3L0000969	66.5092	67.3254	5.97732	6.15148	noncoding	BF749301	lincRNA-ELAC1	lincRNA	263	chr18	-	48545638	48545865		AATCCAGGGTCTAGAACTGTGTAGGACCTAAATCTAAAATGTACTGGGGAGGGGGTTTGT
ASHG19A3A042560	7852.89	6727.2	12.8636	12.7947	noncoding	uc001iuc.2	BC043365	UCSC_knowngene	2078	chr10	-	28811613	28821460		GAATCTGGAGAGTCCTGGGGCCTTGTTTTGAAAAAGACTTGAAATACACATAGGAAGAAA
ASHG19A3L0002678	146.268	129.386	7.10851	7.09943	noncoding	DB131700	lincRNA-PSD3-2	lincRNA	554	chr8	-	18902591	18903145		GATATACAGGTCCCTTGTCAACTTTTTCTATTGTCTTGTGAATCTCTTGGTTTCATATCA
ASHG19A3A035980	42632.2	29972.8	15.3356	14.9309	noncoding	ENST00000492365	KB-1683C8.1	Ensembl	877	chr8	-	98636430	98637307	ENST00000445918,	ATGATTGACTTTTTCCTGGGGGCCTCTCTCAAGCATGAGGTTTTGAAGATTATGCTGGTG
ASHG19A3A040892	134.303	83.5649	6.98673	6.45838	noncoding	ENST00000422047	RP11-245M24.1	Ensembl	639	chrX	+	45369728	45489447		TCCATGCCATGTGTGCCAATGGTAACCAAACCTTTCATCCTGACCATCACTAACTGGATT
ASHG19A3L0002810	403.978	538.437	8.56712	9.17086	noncoding	chrX:39487152-39491369+	lincRNA-BCOR-7	lincRNA	4218	chrX	+	39487152	39491369		ATTTCCATGTGGGTGTGAATCTTTTTATCATGTGCAGATGCTTCACCTCCCTTCTAATTT
ASHG19A3L0001558	92.1988	133.568	6.45291	7.14275	noncoding	chr4:99107102-99123402+	lincRNA-RAP1GDS1	lincRNA	16301	chr4	+	99107102	99123402		ATGGATAAATGCCCCAAGCTTTCTAGCCTCCCACAGGACAGTTTTAAAGCATTTGAGAGA
ASHG19A3A040282	46476.6	28273.2	15.4654	14.8421	noncoding	ENST00000432307	RP11-111F16.1	Ensembl	1813	chrX	-	110862904	110864717	NM_001417,ENST00000432132,	GCAACTATGCTGCTCTCTCTTGATGGTGAAGATGAAAATGAGGGAGAAGATTATGCCGAA
ASHG19A3L0000418	2584.42	2025.36	11.246	11.0747	noncoding	BE080482	lincRNA-CTSC	lincRNA	506	chr11	-	88123120	88123615		ATTAGTAGTTTTAGACATACTTCATTAACCTGCCCTCTGCCTCCAATGTGGATACACTCC
ASHG19A3A050028	28939.7	28687.2	14.7611	14.8632	noncoding	uc001utu.2	EEF1DP3	UCSC_knowngene	1367	chr13	+	32420919	32527609	ENST00000428783,	ATCACCAAGTTTGAAGAGTGTATGCAGAGTGTCGACATCGCAGCTTTCAACAAGATCTGG
ASHG19A3L0002834	72.3017	77.8968	6.09521	6.36306	noncoding	chrX:118619272-118629135-	lincRNA-SLC25A5-1	lincRNA	9864	chrX	-	118619272	118629135		CCACCAATTGTCCTTGAGGGTTGCAGCAGGCTCTTTACTCACATTGTATCATGTAATCTG
ASHG19A3L0001092	271.788	291.935	8.00425	8.27541	noncoding	chr2:151609179-151621879+	lincRNA-RBM43-3	lincRNA	12701	chr2	+	151609179	151621879		CTCCCCAGTTCCCATCAAGAATGCTATGTTTACTGGAAAGACAGAAATTTCTTAGTTTCA
ASHG19A3L0000178	235.43	178.362	7.79288	7.56466	noncoding	chr1:86683137-86705987-	lincRNA-COL24A1	lincRNA	22851	chr1	-	86683137	86705987		TAGGAGATAAGGTGTGGCATTTTTCCCTCTACTGTGACCTAAGGAAACAATTTATTTTTA
ASHG19A3L0002600	60.9395	74.7814	5.84519	6.30355	noncoding	DB297852	lincRNA-PHC1	lincRNA	531	chr12	+	9064970	9065498		ACAGTGATAATTCTCCCAGGGAAACTAAGGAAGCACATGAGTCATGTTTCCTTAACTTTA
ASHG19A3L0002063	215.421	197.531	7.66849	7.70866	noncoding	chr8:23609030-23619205-	lincRNA-NKX2-6	lincRNA	10176	chr8	-	23609030	23619205		AAAGGTTAAAAGGGAGAATTCCTTAGCAGGGTCCTCTTGTCCGCTTTTCTTCCAAACGTC
ASHG19A3L0003397	101.424	98.7659	6.59318	6.69895	noncoding	chr5:126055611-126069263+	lincRNA-LMNB1-1	lincRNA	13653	chr5	+	126055611	126069263		CCTCCACATTGTTGTGGTTTTCTCTGTGTTTCCAGCATTTTTGAAAATTGACCTTGTTAA
ASHG19A3L0000782	578.776	478.333	9.07939	8.99798	noncoding	chr14:84962047-84980772+	lincRNA-FLRT2-4	lincRNA	18726	chr14	+	84962047	84980772		GAAATTATTCTTACCACGACCCTTACCTTGCTTGCTTTTGCCTCTTATGACTTTGACCAT
ASHG19A3L0001864	259.558	208.69	7.93554	7.79065	noncoding	chr7:127748489-127763889+	lincRNA-LEP-1	lincRNA	15401	chr7	+	127748489	127763889		TTATAGCTCCCGTCACCCAAGGCTATTGCGTGTCTCTGTGTCTCTGGAAGTTAATTAAGA
ASHG19A3A013611	477.157	544.668	8.80563	9.18566	noncoding	ENST00000447571	AC079807.4	Ensembl	1808	chr2	-	48168834	48468122		ACTGGTTGAAGGAAATCCATGTTGGGCTTCTGTGGATGCTGGATTCTTTCCTTCTGAGAA
ASHG19A3L0001127	127.591	136.19	6.91629	7.17121	noncoding	BU853353	lincRNA-NT5C1B-2	lincRNA	766	chr2	-	19545567	19546173		ATTGCTTTTGGGTAATCTTCACAGGAACACATTAGCAATTTTCCCCTGGTTGGTGGGTAC
ASHG19A3L0002406	831.619	860.173	9.61114	9.83753	noncoding	chr1:77167210-77175109-	lincRNA-ST6GALNAC3	lincRNA	7900	chr1	-	77167210	77175109		AGCAAATTTCCAACTCCCTCTATCTTTTAAAGTTGTCTCTTCCACACCCAATTTGATTGT
ASHG19A3L0001778	258.002	234.411	7.92824	7.95581	noncoding	AW167909	lincRNA-WRNIP1	lincRNA	518	chr6	-	2812462	2812980		TAACATCTTCATTGTTGTTTACTGTTGCCCTAACACCCTCCAATCAACCATTCATCGATG
ASHG19A3A029461	112.418	182.446	6.73907	7.59561	noncoding	ENST00000450310	RP3-471C18.2	Ensembl	191	chr6	-	19690055	19753344		GAATATCCTCTAAAAGGCAGCTAAGCACTCGCTGTCTTCTTCCTTTTGCCTCATCAAGCA
ASHG19A3A052888	592.531	319.358	9.11569	8.40855	noncoding	NR_024490	LOC100129387	RefSeq_NR	4139	chr15	+	50646370	50650501		AGGGAAAGAAAATATGCCATTTCTAGCGCTTCAGCCACACAAAGAAAGCGGCGGAATGAT
ASHG19A3L0001021	110.291	160.983	6.71092	7.4154	noncoding	AW661739	lincRNA-NPAS2-2	lincRNA	421	chr2	+	101306225	101306647		TTCAAGTGTGAACTCAGTTTATCTCCTGTTTCCTCCAATAGCAAGGCGCTTGCTCTTGTG
ASHG19A3L0002049	76.506	76.3346	6.17784	6.33526	noncoding	chr8:20578220-20590170-	lincRNA-LZTS1-1	lincRNA	11951	chr8	-	20578220	20590170		TCCGTTGAAAACATTTTAAAAGGGCTTCCTTGTGTTCTCAGGAAGTTTCCATTCCCTCCA
ASHG19A3A046574	186.51	213.714	7.46005	7.82551	noncoding	ENST00000439156	RP11-776H12.1	Ensembl	1796	chr1	-	61005920	61106163		ACCAAGTTTAGCCTGCCTTTGCTATTTTGGCGTATCTCCAATTCTTCATGATTTTCTCAT
ASHG19A3L0000968	82.8234	86.0173	6.29323	6.49917	noncoding	chr18:47271277-47283077+	lincRNA-ACAA2-2	lincRNA	11801	chr18	+	47271277	47283077		TTTTCCAAGACAGTCCACTGACTTCATGGGGAATGAATGGCTCCCATCAACTGCATTTAG
ASHG19A3L0002626	74.9431	140.265	6.14911	7.21304	noncoding	BF445802	lincRNA-NR2F2-3	lincRNA	375	chr15	+	96787623	96787999		ACCATTTGGGTTTCTCTCCTCTAGTTCCTGAATCCCACTGGAGAAGCCATAGTTTTTCTT
ASHG19A3L0000389	67.5868	84.6248	5.99884	6.47784	noncoding	AA854104	lincRNA-MTCH2	lincRNA	547	chr11	+	47626129	47626679		ACCTCTGAGGGGATCTATTAGAAACCATTAACAGCAGTTGCTGTTAATATGTCTCCCATA
ASHG19A3L0000097	109.174	110.107	6.69779	6.86076	noncoding	chr1:232506752-232522177+	lincRNA-SIPA1L2-2	lincRNA	15426	chr1	+	232506752	232522177		TGAAATTCCATGTCTATTTGTTTTAGCAGCTGGTAGGCTTCTGGTGGCCCTCATCAGAAC
ASHG19A3A027881	91.1901	67.7168	6.43513	6.16075	noncoding	NR_026994	LOC340094	RefSeq_NR	1763	chr5	+	5034471	5070109		CCACAACTCAGACTTATTTTCATTCTCTGCTCATTGGCCATTAGGAACCCGATCCTTATG
ASHG19A3A033810	1146.26	454.499	10.0783	8.92449	noncoding	ENST00000447933	AC073871.2	Ensembl	766	chr7	-	156264939	156398458		TTAAAATCCTCAAGAATAAGGAACATAGGCATGTGTCGTAACGGTCTCCACAGTGGGGGA
ASHG19A3L0003194	288.974	241.195	8.09023	7.99603	noncoding	AA431609	lincRNA-ZNF706-1	lincRNA	499	chr8	+	102141213	102145473		ATTCTTCATCTGGATGTAATCACCTTGCTTTTCCATCCCAGGCTCTGTTCTCACTCATGG
ASHG19A3A042289	105.113	87.8402	6.64389	6.52758	noncoding	NR_015422	LOC149134	RefSeq_NR	1123	chr1	+	246952918	246954788		TACGTTTTGATCTGTTTCTGCGCCCTCGCCGTATAAATTCAGACCTTATAGGATTTGGGG
ASHG19A3A030746	1384.96	2319.76	10.348	11.2713	noncoding	ENST00000344851	RP1-274L14.2	Ensembl	1979	chr6	-	158658367	158663829		TTATTTCTGCTTACTCACTTGCAGATCCAGAGAAAGGCACAGCTCTTAGTAAACATTTGC
ASHG19A3A019186	89.4529	86.8369	6.40678	6.51225	noncoding	uc002ytn.2	CR626360	UCSC_knowngene	2657	chr21	+	35303425	35343487	ENST00000427447,	TCTGTCACCTCTTTCTAAAAGCTGGGAAATGGTTATTGTCAACGCCAGCCCCATTTTGGA
ASHG19A3A009621	1178.17	1559.17	10.121	10.6889	noncoding	uc002ike.2	LOC644246	UCSC_knowngene	513	chr17	+	44270938	44274080		AATGATGGAGGAAAAAACAGTCCCTCTTCCTCAGACAGTGACACCTCAAACTGCTACAGT
ASHG19A3L0000238	125.654	166.45	6.89358	7.463	noncoding	CA442294	lincRNA-PARD3	lincRNA	693	chr10	+	33653361	33654040		AATTGTCACCATATCCTGTGATCATACTGCAGAAAGGATCTCCTCATTTCATCCCCGCAT
ASHG19A3L0002702	2367.66	3674.11	11.12	11.922	noncoding	AX747237	lincRNA-KIFC3	lincRNA	3159	chr16	-	57792130	57896733	NM_001130100,NM_001130099,	CTCTCGAATTTTCTTCCCTCTGAAATCCTATTTAAGAACTTTTGGAAGCTTAGCCATTTT
ASHG19A3L0003486	1212.85	1089.58	10.1609	10.1757	noncoding	CR616945	lincRNA-ZNF385B-1	lincRNA	1801	chr2	-	180808862	180815459		TAGAACTTCTCCCACAGGAAATATTTCTTCTCTCTGGACTCCTTGATATCATTTAATTGA
ASHG19A3L0002363	1325.36	1476.52	10.2852	10.6147	noncoding	BM043959	lincRNA-ADAMTSL4-2	lincRNA	754	chr1	-	150541859	150542587		AGCAGGGATGGACTGTGTAGGTAATTTGCTTATTCCATCTTCCTTCCCTGCCTTCTTTCT
ASHG19A3L0000625	267.579	285.143	7.98192	8.24168	noncoding	chr13:43764375-43778425-	lincRNA-DNAJC15	lincRNA	14051	chr13	-	43764375	43778425		TATCAGGCTTAAAGGATCTTGCTGCCACTCCCAGAAGTAGCCCATTTCTCTTCAATATGC
ASHG19A3A008615	1660.03	248.036	10.6087	8.03883	noncoding	uc002ivh.1	AK126318	UCSC_knowngene	4722	chr17	-	56066404	56072211		TCAGAGCTTATGTGCAGAGTTCCAAGCCCCAAAGTTAATCTAGAACCACTCGATAACACC
ASHG19A3L0000391	195.294	147.009	7.52553	7.28288	noncoding	DA088898	lincRNA-INCENP	lincRNA	560	chr11	+	61740183	61740743		CCTATCACATGCCCTAGCTATGTGTTTACCTCCTGGCTGGACTTTGAACTTTTAAGCTGT
ASHG19A3A014288	26801.2	31466.5	14.6414	14.9941	noncoding	ENST00000393071	AC013474.3	Ensembl	732	chr2	-	127315006	127315739	NM_145690,NM_003406,NM_001135702,NM_001135701,NM_001135700,NM_001135699,ENST00000399764,	AATTACTGAGAGACAACTTGACATTGTGGACATCGGATACCCAAGGAGACGAAGCTGAAG
ASHG19A3A055234	214.87	181.825	7.66434	7.59002	noncoding	uc003ttc.1	AK125429	UCSC_knowngene	4369	chr7	+	64035072	64078967		TTGGTGGTCCCAGCTTCAAAGAAATACTTGTCTGCAGCGCAGATTGCTACATATTGCTTG
ASHG19A3A023066	129.688	127.69	6.93901	7.08137	noncoding	ENST00000440922	GOT2L1	Ensembl	1310	chr1	+	55833137	55834447		TGGAGTCACAGTTGAAAATCTTGATCCATCCCACGTATTGTGACTCTCCTCTCAATGAGG
ASHG19A3A050364	34564.6	26292	15.0279	14.7449	noncoding	ENST00000446970	RP11-568F20.1	Ensembl	266	chr13	+	87871258	87871524		CACAGGCAAGCAGCTGGAAGATGTCCACACTCTTTCTGACTATAAAATCCAGAAAGTGTC
ASHG19A3L0001827	276.705	153.467	8.02884	7.3462	noncoding	BE065042	lincRNA-TPBG-2	lincRNA	676	chr6	-	83145295	83145951		AACTGGCGCTTTGTTCAACGTTTGTTTTTTGTTCTGTTTTGTTAACTACCACTTTGCAAA
ASHG19A3L0002145	1859.96	1191.96	10.772	10.3072	noncoding	BG191796	lincRNA-PSKH2	lincRNA	492	chr8	+	86901807	86920839		TTTATCAAAGGAACCAATATGGAAGGAAAAACATTGCTTTGAAGGGAAGATGGATGGATC
ASHG19A3A026883	179.808	121.589	7.40524	7.0085	noncoding	ENST00000514578	RP11-83M16.4	Ensembl	389	chr5	-	66988639	66989028		TTTTAGATGTCAAAACCAACATGCACCAGTTCCAAAGGCTGTGAAGAAGCTTCATGACAC
ASHG19A3L0001494	99.2546	120.583	6.56392	6.99713	noncoding	chr4:3829252-3852702-	lincRNA-ADRA2C	lincRNA	23451	chr4	-	3829252	3852702		TTGATCTTGTGTGTGCTCTCTGGGAAGCGGAGTAAACTGGGATCTTGAGGAGCCAGGCGG
ASHG19A3A019078	74.8158	67.1904	6.14697	6.14867	noncoding	ENST00000510743	AP000998.1	Ensembl	2633	chr21	+	19375900	19378601		GGAGCTAGGCCCCTTTTGTAGTTAACCAGAATCCATATCCACCTAGAAAACATGTAGCTC
ASHG19A3L0002719	350.873	329.401	8.36277	8.45374	noncoding	FN177586	lincRNA-IRF2BP2-3	lincRNA	119	chr1	+	234736258	234736389		ACCAATTCTGACCAGCCTCCTGTTCCAACTGGCCTCTTGATTGTATAAAGATAATGGGTC
ASHG19A3A009936	566.163	481.022	9.04649	9.00629	noncoding	uc010wse.1	KIAA1783	UCSC_knowngene	9651	chr17	+	73584138	73622925		GCTTGTTCTGAACCCCCACCGGTCCTTGCCTCTTTTTTCACCTGAGGTCCAGGCAAGCTA
ASHG19A3L0000731	199.34	162.132	7.55294	7.42527	noncoding	DA195606	lincRNA-FRMD6-3	lincRNA	564	chr14	+	51741818	51742382		TTAAGTTACTTGGGTTTGGCAGCTCAGTCTGTGTGTGTTAGGGTGTGTTCTTATATCATT
ASHG19A3L0000803	7519.5	8113.78	12.7979	13.0563	noncoding	AK311417	lincRNA-ATPBD4-2	lincRNA	1074	chr15	+	35473999	35530398		TATTTTGAAAAATTCCTATTGTGATTTGACTGTTTTTACCCATATCCCCTCCCCCGCTCC
ASHG19A3L0000652	2941.26	2536.3	11.4295	11.4028	noncoding	AI208830	lincRNA-OLFM4-6	lincRNA	409	chr13	-	55560449	55560854		GTTCATTATCTTCTCCTCCCTAATCCTAGCGAATACATAGCTGCCTTTGCCTAGTTTCTT
ASHG19A3A032652	1063.41	1182.06	9.97161	10.2929	noncoding	ENST00000450133	RP9P	Ensembl	1212	chr7	-	32956426	32982650		AATGAATACGCCAGAGAATTTCTGGCTCATGCACCAACTAAAGGACTTTGGTTGCCACTG
ASHG19A3L0001532	1370.33	1768.38	10.3333	10.8789	noncoding	AK124936	lincRNA-FAM47E	lincRNA	1624	chr4	+	77135192	77204933	NM_001136570,	CTTTATCACCCATGAGATCAATATTCACATGTAATCTTCTCATATTTTTGTGGCACGTGA
ASHG19A3L0001422	242.089	239.466	7.83466	7.98474	noncoding	BX648380	lincRNA-THUMPD3-2	lincRNA	3418	chr3	+	9217734	9520905		CTTGGTTAAGATGTAATAAATGGATGGGGCTGGGAAAGAGGATAGAAGATCCTGTAAGAG
ASHG19A3L0001208	576.959	525.69	9.07508	9.13453	noncoding	chr2:68206296-68223571+	lincRNA-C1D-1	lincRNA	17276	chr2	+	68206296	68223571		GCAGCCTCTTCTTAAACTAATGGCATTTGATTTAGTTTGTTCCCTTCCTTTTCTCTACCT
ASHG19A3A024567	135.134	108.417	6.99505	6.84048	noncoding	ENST00000505438	AC004069.1	Ensembl	1113	chr4	-	106024048	106025161		AAATTGAAATCACAAGGTTACTTCTCAACCCTGTCTGTGAACCGTTTGGATGTTTTTGGT
ASHG19A3L0002851	3951.08	3459.59	11.8704	11.8316	noncoding	AK125219	lincRNA-HAUS7	lincRNA	2124	chrX	-	152713127	152760978	NM_017518,	ATGAACTAATGGAGAAATAGAAAGTCTTCAGTGATGGCCTACGCCAAAGCACAGGATGGG
ASHG19A3L0003037	85.4065	88.7725	6.33536	6.54279	noncoding	chr14:75087240-75099311+	lincRNA-KIAA0317	lincRNA	12072	chr14	+	75087240	75099311		TCTCCCATGATTTGGCCCTGAAGCAGAGACACACAGTTATAACTAAACCATCCAATCGCA
ASHG19A3L0003281	246.133	304.354	7.85773	8.34202	noncoding	AI214699	lincRNA-HES1-5	lincRNA	382	chr3	+	193461410	193461788		AGTGTGGCAATTTCAGGCTCTGGTTTCACTCCTCACTGCCGCCCTTCACAGTCCTCCTGA
ASHG19A3A050772	82.4236	89.432	6.28719	6.55364	noncoding	ENST00000434482	AL583842.4	Ensembl	733	chr1	-	142660016	142660749	ENST00000445709,	GAGTGAGAGACTTGAAATCACAGATGGAGCATTTCTTGCAACAAGAGATACTATTTTTTC
ASHG19A3A029434	193.2	161.976	7.51023	7.42394	noncoding	ENST00000437648	RP11-146I2.1	Ensembl	1017	chr6	-	14977018	15090234		AATTCTTGCGAGGATGAACTCAAGATACAAAATATGCTTGGCAACTCACCCCTGAGTGGC
ASHG19A3A053921	187.349	168.375	7.4651	7.48018	noncoding	uc002fcp.1	BC043527	UCSC_knowngene	966	chr16	-	74226290	74249420		ATTCCTCTGTGAAGACCCAGCTCTTTCTTTGGCTCCTTTTTTGAAGCCATCTTTGCTCTG
ASHG19A3A050106	785.308	945.172	9.52755	9.96668	noncoding	ENST00000419514	RP11-366O17.2	Ensembl	192	chr13	+	43385972	43386428		TTTTTTTAAAAGCCACAGTTTCATTGTCTTAGTCAAAGCAAGATTATTACGTGATTATTT
ASHG19A3L0001792	149.156	131.915	7.1395	7.1262	noncoding	CN412465	lincRNA-FGD2	lincRNA	563	chr6	-	37103028	37103592		TAAAATTAGAACTGACTTTCAGTACTGGCCCTACCTACCAGCTGAGTACCTTATTTTTAT
ASHG19A3L0002681	75.8482	112.388	6.16567	6.89206	noncoding	AW511194	lincRNA-SH2D4A-2	lincRNA	450	chr8	+	19041183	19042173		TGTGGTCAGTCTTCTCTTGTTCTTCAGGATCAGTGACTCATTGGACACTTGTGTGGTATG
ASHG19A3L0001213	247.046	244.658	7.86377	8.01675	noncoding	AW418755	lincRNA-APLF	lincRNA	635	chr2	-	68855011	68857996		TATTCCTGAAGAATGTCCTTGGTTGCCACAGAACCCATTCTGCTCCACCTTCTGAAAACT
ASHG19A3A037126	139.556	196.089	7.04187	7.69843	noncoding	AK026322		misc_RNA	1284	chr9	-	14588795	14590063		GTCTCCAACCCTGTGTGAACTCTGAAAATTGTTCAGCTCCCAATTTCGCAGTAATTTTTT
ASHG19A3A041074	11730.3	12859.7	13.4418	13.7204	noncoding	NR_015367	LOC550643	RefSeq_NR	722	chrX	+	56755717	56844002	ENST00000374922,	TATTTACAATGCTACCCTGCTTTTTCTGGTGTCCTGAACCTGGAAGTTGTGCTTTTTAAG
ASHG19A3L0003543	541.975	558.449	8.98719	9.2218	noncoding	chr1:203291278-203297051+	lincRNA-FMOD	lincRNA	5774	chr1	+	203291278	203297051		ATGATTTTTGCACCTTCTCACGTTTGCAAGTCCCTCTTCCTCAATATGCTTGGTGGTGAG
ASHG19A3L0000018	786.043	1042.92	9.52868	10.1093	noncoding	chr1:116797827-116838952-	lincRNA-C1orf161	lincRNA	41126	chr1	-	116797827	116838952		ATTGTATTTTGCTCTGCAAAATCCTGAGAGTCTTCCCTTCCCTAGTGCATAAAGACCTGG
ASHG19A3A047784	2777.7	3077.37	11.3523	11.6627	noncoding	uc001stu.2	BC035381	UCSC_knowngene	3099	chr12	-	68102828	68123221		TTCAGGAATTTTCATCTGATTTGATGATTGATGCCCTCCCCATCATGAGCCCCAGGAAGT
ASHG19A3L0002477	372.533	499.244	8.45147	9.0618	noncoding	chr1:13902316-13904644-	lincRNA-LRRC38	lincRNA	2329	chr1	-	13902316	13904644		TTTCAACACAGATCTACTTCCCCATCCCATTGTTTGTTCTTCCACTTTGCTATACAAAGA
ASHG19A3A017827	72.7924	80.1336	6.1062	6.40075	noncoding	ENST00000439110	PTMAP6	Ensembl	327	chr20	-	55275892	55276570		GAAAATGATCAGGATGACAATATTGTTACCAAGAAGCAGAAGACCAATGAGGATGACCAG
ASHG19A3A055266	6390.16	6970.09	12.5559	12.8441	noncoding	uc009wxq.1	BC039493	UCSC_knowngene	538	chr1	+	181143619	181151340		AAGGCCACTCCCTCCCCAGCCTGAGGAACACTCTACTGGTAAGGGGAGAAATGCCTCAAA
ASHG19A3L0000611	425.709	388.989	8.64212	8.69626	noncoding	CA307860	lincRNA-USPL1-2	lincRNA	747	chr13	+	31189988	31190719		CAAGTCAAGCCCCGCCTCCATTTTGTTTCTGTTACTAATTTTTCTTCTGAAAAAATACCA
ASHG19A3A043676	234.089	253.207	7.78503	8.06846	noncoding	ENST00000419987	RP11-188P8.2	Ensembl	799	chr10	+	20036751	20037550		GTAATGTCTGGTATACTTCTGATATGACAAAAACTAGCCCCTATCTCGATTATGTTTCAA
ASHG19A3A047893	851.641	789.735	9.64456	9.71447	noncoding	uc001tcu.2	AK098304	UCSC_knowngene	3324	chr12	-	93936239	93965544		CAAGAGAAGCAGGCTCTCCCCTTCTGAAATGATGAGTGATAATGACCATACAGGTCAACT
ASHG19A3L0000348	1899.28	1607.51	10.8049	10.7346	noncoding	DA922283	lincRNA-TH	lincRNA	568	chr11	-	2229882	2230451		TTTCTGCTTGGCACCTGGCTTGCCATCCCGCTCTACCCCAGGGCACTCAGACCTCAAACT
ASHG19A3A028065	129.758	118.805	6.94033	6.97427	noncoding	ENST00000495944	CTD-2127O16.1	Ensembl	589	chr5	+	31053671	31054260		TAAGAAAAAGCATACAGCCAAATGCCCAAATGCCAGGGCAGGTCACTTGGATAAGGAGAA
ASHG19A3L0001277	16759.9	16958.9	13.9592	14.1231	noncoding	chr21:21942829-22002654+	lincRNA-NCAM2-6	lincRNA	59826	chr21	+	21942829	22002654		GATAAAATCCACTATGACTCAAATTCTTTCTCCCTCCTCATTGCAGTATTTTCACATTTG
ASHG19A3L0001780	89.7039	133.385	6.41072	7.1408	noncoding	BI830735	lincRNA-ZNF391	lincRNA	899	chr6	-	27391285	27392131		TATGAATAGGGAAACCTTATCTAGTGGTCACTTCTTCAATCTCCACAGCCACAATTCGAA
ASHG19A3L0002109	100.681	67.2393	6.5841	6.1499	noncoding	AW812672	lincRNA-MCPH1-1	lincRNA	449	chr8	-	6559168	6563761		AATGGCACATTTGAACGCCTGAAGCTGAGAAATCCCCATATTCTCATGCATAGCACTGGA
ASHG19A3L0000933	82.7468	84.76	6.29219	6.48	noncoding	exon1960-	lincRNA-CTAGE1-2	lincRNA	231	chr18	-	20047237	20047467		GCTCTTCTTCATGACTCCTCGCCAATGCACAGATGTAAACTATTGTCTGATTATTAAAAG
ASHG19A3A013039	194.97	145.552	7.52349	7.26835	noncoding	AL162037		misc_RNA	3019	chr1	-	239411109	239414118		CAGCCTCACCTACCCCAATGAATATATGATATCAGACATATTAAAAGACATCTGGATTCT
ASHG19A3L0001947	78.7069	72.3917	6.2194	6.25689	noncoding	BX503241	lincRNA-FZD6-1	lincRNA	473	chr8	-	104372463	104372936		TAGAAGCTTGAACTTAGAAGAAGTTCCACCCATACTCCGGCTCAGTTCTTAGACTTCTCC
ASHG19A3A029465	3225.98	2639.26	11.5727	11.4563	noncoding	ENST00000446953	RP1-130G2.1	Ensembl	486	chr6	-	20042685	20043171		AAGTTCCTGGGGAACATGTGCTTTACCAAGAAGCACAAGAAGAAGGGCCTAAAGAAGATG
ASHG19A3A013684	110517	126254	16.7677	16.9244	noncoding	ENST00000451515	AC010733.5	Ensembl	400	chr2	-	61165339	61165739		GTTACGAACTATGGCAAGGAGTCTCAGGCCAAGGATGTCATTGAAGAGTACTTCAAATGC
ASHG19A3A039319	129.77	206.946	6.94046	7.77951	noncoding	uc004bxt.1	AX747401	UCSC_knowngene	1772	chr9	+	132098802	132100574		TTTCCTAATTTGTCAGGATTTTAGGCCACATGGCAGCTGGGGGCAGAAACATTTCTGAGA
ASHG19A3A036497	26553.4	30248.9	14.6317	14.9414	noncoding	ENST00000498256	RP11-200A24.1	Ensembl	554	chr8	+	29489606	29490160		GTTCCTAAACCAGAAAAGGAAGTTGCCCAGAGGAAAAAGATATCCCAGAAGAAATTGAAG
ASHG19A3A051052	997.316	576.77	9.87778	9.26504	noncoding	AK055958		misc_RNA	2041	chr14	-	91314205	91316246		CAGTAAGGGCTTACTTTTTACCAACTTGTGTGTGTGTAAAGATGTATTTGTTCAAGCTTT
ASHG19A3L0000916	1975.81	1349.74	10.8564	10.4838	noncoding	AK126994	lincRNA-PLEKHM1-2	lincRNA	3857	chr17	-	43590550	43675867	NM_001006607,	ACAGCCCACCTCAGGCCTCCTGCAAAAATACATAGAATAAACAACAACAGTTACTAAATG
ASHG19A3L0002458	22913.4	20717.1	14.4025	14.4168	noncoding	EB388332	lincRNA-MYOC	lincRNA	699	chr1	+	171561933	171562679	NM_015172,	ACAGGGGTAACGCACCTGTATTAAATATGTAAAGGTCTTATCTACATGGGTTTGATTACA
ASHG19A3L0000970	177.293	110.907	7.38632	6.87119	noncoding	AK303027	lincRNA-SMAD4	lincRNA	1207	chr18	+	48494409	48584514	NM_005359,	ATTCAATTCAAACCATCCAGCATCCACCAAGTAATCGTGCATCGACAGAGACATACAGCA
ASHG19A3L0001454	687.348	689.637	9.33507	9.51712	noncoding	DT216591	lincRNA-RAB28-4	lincRNA	636	chr4	+	12129003	12129639		ATAGTATCACTGTTAAACACATTGCCCACCTTTAGCCCTCAGTCCCATCCAAAGTTGTTA
ASHG19A3L0001805	75.9195	90.0868	6.16705	6.56275	noncoding	AA219306	lincRNA-CLIC5-2	lincRNA	428	chr6	+	45828094	45828532		TACCAGGAAAAATTGCAATTCCCTTTCAATTTCTTCTCAGCTGGCCCCAGGGTAACAGGT
ASHG19A3A031763	179.201	172.926	7.40066	7.5178	noncoding	CR625516		misc_RNA	443	chr6	+	81150446	81150887		GGCTCTGAAACTAAAGGTCATTCCATTCTTGTCTTTAACTTCACATGATGGTTAAAACAG
ASHG19A3L0001079	476.173	429.178	8.80011	8.84245	noncoding	DA492035	lincRNA-GTDC1	lincRNA	564	chr2	-	144966196	145277686	NM_024659,NM_001164629,NM_001006636,	TTTATACCCCTTCCTGCAAAGAAATGGCATTGGAGAGCCCGGACATCTGCTTTATATTTC
ASHG19A3L0000433	159.723	179.54	7.23874	7.57321	noncoding	chr12:114569667-114608017-	lincRNA-RBM19-1	lincRNA	38351	chr12	-	114569667	114608017		TGAAGACTTCAGGAGTTTGAAGCATTGTCAGCCACCTCTCCTCATGGGTGGTTATTCTAA
ASHG19A3A035088	82.5081	161.81	6.28854	7.42256	noncoding	ENST00000457638	AC093106.4	Ensembl	1053	chr7	+	131350338	131812561		TTTTTATAAGCAAGATGGGCTGTGGCTCTGGATACCTGGCTCAAATTTCTCAGTCCCCAA
ASHG19A3A009980	214.748	199.6	7.66387	7.72559	noncoding	NR_003013	SCARNA16	RefSeq_NR	187	chr17	+	75085388	75085574	ENST00000366365,	AGTAACAGGTGTGAGCATTCTAGCAGCAGTTTGATGATCATGTATGATACTGCAAACAGG
ASHG19A3A012252	254.097	154.978	7.9072	7.36041	noncoding	uc002msx.1	AX747405	UCSC_knowngene	1801	chr19	+	12098431	12138553	AK097171,	TCCTGGACTGCTCACGGGAGTTCTGCAGGAGACGCCGGAATATCTGGAAGCTGAAAAATG
ASHG19A3L0003431	102.513	196.004	6.60776	7.69777	noncoding	chr2:121182275-121194039+	lincRNA-GLI2-3	lincRNA	11765	chr2	+	121182275	121194039		ATTTTACCACTCAGCTTCTCTTTTTCTTTTCTGCAAGGTGAGGGTAACTCTCCTGCCCAG
ASHG19A3A029344	572.889	629.481	9.06435	9.38779	noncoding	AK128360		misc_RNA	2848	chr6	-	3992747	3995592		TTCCGCCATGATTATAAAGCCCTTCCCTAGCCCCATGTGATACAATTTTCTTTCTTATAA
ASHG19A3A007147	529.317	553.566	8.95266	9.20939	noncoding	NR_003531	MEG3	RefSeq_NR	1735	chr14	+	101292444	101327358		ACTCCGTGGAAGCACGCTCACAAAGGTTCCCAGTGCCCCCGACAAGCCCCTGCTGGTGTC
ASHG19A3A018501	331.933	277.982	8.28715	8.20561	noncoding	ENST00000439558	RP5-907D15.2	Ensembl	648	chr20	+	57090782	57149026		AAGTGTACTGGCTCCTGTCCTGGATCAACTCAGAAAATGAAACACATCGGATTCTGTCCA
ASHG19A3A049511	480.397	332.708	8.81495	8.46812	noncoding	uc001uzl.2	BC025370	UCSC_knowngene	976	chr13	-	44974387	44980021		AGGTGTGCGGCATTGCCTCTGGGTCCCTGCTTTGGTTTAATTAAACTAAGTCTGGTGGTG
ASHG19A3A016645	12228.9	16360.4	13.5045	14.0656	noncoding	ENST00000392131	AC079305.6	Ensembl	550	chr2	+	178062712	178063262	NM_002273,ENST00000450021,	ATGAGTATCCATACGAAGACCACCAGCAGCTATGCAGGTGGTCTGAGCTCGGCCTATGGG
ASHG19A3L0000511	126.887	67.0017	6.90871	6.14492	noncoding	chr12:60208733-60258008+	lincRNA-FAM19A2-1	lincRNA	49276	chr12	+	60208733	60258008		TTATGATTCACTTTAAATCATGTCATTTTTATGTCTGGGCCTTTTCCCTATGAAATATTC
ASHG19A3A055226	1266.26	1500.86	10.2175	10.6335	noncoding	uc003pqc.2	BC047952	UCSC_knowngene	879	chr6	+	99973939	100033082	ENST00000452647,	ATAGAAAAGTGTGGCTGGTCTGAAGGTTTGACGTCAATAAAGGGAAACTGCCACAATTTT
ASHG19A3L0000388	7422.9	15041.2	12.7779	13.9481	noncoding	DA706379	lincRNA-C1QTNF4	lincRNA	574	chr11	-	47629926	47630498		TTTAAACAAGACTAATTCCATCATCTCCCCCAATCGAACTTTGAAATTTCTGTCCACCTT
ASHG19A3L0002823	350.488	357.037	8.36152	8.5718	noncoding	chrX:40874482-40878593-	lincRNA-MED14-4	lincRNA	4112	chrX	-	40874482	40878593		AAGTAAGATCAATGTTTCTTCAGCCTCTTCTCAACAAAATTCCACCCACCTCTTCTTGAT
ASHG19A3L0001176	909.706	1008.9	9.74082	10.0636	noncoding	BM704421	lincRNA-NDUFA10	lincRNA	436	chr2	+	240323441	240324049		CCTGTGATTCTTGGTGGGGGAAACTAGTTATGTGGATAAAAATACAGTTAGCAAAATAAA
ASHG19A3L0002638	29342.4	24584.6	14.7842	14.6541	noncoding	AK096322	lincRNA-FBRS	lincRNA	2890	chr16	+	30671242	30682130	NM_001105079,	TGGGGCTTCTTCTGTAACATGACTTGCGAATATTTATATAAAAACGAGTGTTACAATGAG
ASHG19A3A016503	63.0188	88.7697	5.89854	6.54261	noncoding	ENST00000449526	AC005042.5	Ensembl	510	chr2	+	159542414	159610287		TACCTCCCTTCAAGTTAATGTTGGAGCTTCTCCAGGGCTGACTTGGGAGAGGAGCCGGCA
ASHG19A3L0001157	203.162	242.005	7.58285	8.00128	noncoding	chr2:234783886-234795411-	lincRNA-HJURP-1	lincRNA	11526	chr2	-	234783886	234795411		ATTGACTCAGGGCCTGACAAGAAGAAGAGTCCTGCCTGATCTTTGGCCAACTTTCTTATT
ASHG19A3L0003579	61.0562	74.2777	5.84846	6.29352	noncoding	chr1:200231279-200242758+	lincRNA-ZNF281-1	lincRNA	11480	chr1	+	200231279	200242758		TAGGGACTCTTCATATTCATAAGGCACAAGGCTCTCCTAATGTGCCTCTTGTGTAAGAGA
ASHG19A3A007182	142.816	281.891	7.07304	8.22637	noncoding	NR_015389	LOC339290	RefSeq_NR	3979	chr18	+	5238098	5246503		AGGCCCTGGCCACTACCAGGAAAAAATCCTTTGCACATGGCCTGCTATCAACAATCCTCT
ASHG19A3A029632	13063.5	21172.3	13.6045	14.4483	noncoding	ENST00000441380	IFITM4P	Ensembl	420	chr6	-	29718505	29718925		ATCATGACCATTCTGCTCACCGTCATCATCCTAGTGTTGATCTTCCAAGTCTGTCGATAG
ASHG19A3L0002198	466.994	462.915	8.77356	8.95029	noncoding	chr9:126100254-126117679-	lincRNA-STRBP	lincRNA	17426	chr9	-	126100254	126117679		AAGAACAATCTCCTCAGTGTGGCCCTTGAGGTCCTGTGATCTGGCCTCTGTCCACCACCA
ASHG19A3L0000500	377.001	429.797	8.46879	8.84619	noncoding	AW976885	lincRNA-FAM113B-3	lincRNA	664	chr12	-	47659236	47659885		TGGTTAATGGATTCCAGAAAGAATGGAGCAACTCCTTCTGCTACTATCATCCTCCCTGTT
ASHG19A3A032463	1268.89	785.218	10.2205	9.7061	noncoding	ENST00000399411	AC006465.4	Ensembl	1150	chr7	-	7948930	7950080		CGTGGCCAAAAATGTGCTGAAAGTAAATGAAAACTTAACTAAATTCATCGCCATCAAGAA
ASHG19A3L0002251	183.633	143.375	7.43838	7.24362	noncoding	BM750448	lincRNA-FAM70A	lincRNA	517	chrX	-	119184894	119746242		TATCCATATTTAGCCCAAGTGCATTCCTTCTGAGGCTCATTTATATGTCTTCATATGCCA
ASHG19A3A047650	2087.25	2028.2	10.9344	11.0761	noncoding	ENST00000513381	RP11-834C11.5	Ensembl	499	chr12	-	54478915	54519614		AGCAATTTTCTCCCTCTCCAGGCCTCTTACAGATGTGAAACAACTGGCAGATCTGACTTT
ASHG19A3L0002439	222.282	203.501	7.71252	7.75445	noncoding	chr9:21753446-21790681-	lincRNA-IFNE	lincRNA	37236	chr9	-	21753446	21790681		ATAATTGTAGGTATCTGTCAAAATTTCTAACCCTTCCTTTCCAACAGTTAGCCAAGTGTG
ASHG19A3L0000008	66.1356	109.495	5.96901	6.85328	noncoding	chr1:109063527-109078202-	lincRNA-NBPF6-1	lincRNA	14676	chr1	-	109063527	109078202		GCATATTATAAACTAAGTGTTCTTATTGTAAGACACCCCAAAACCCTCATAGAACAAGGC
ASHG19A3A009612	917.086	859.241	9.75222	9.83536	noncoding	NR_026906	C17orf69	RefSeq_NR	942	chr17	+	43716340	43723594		GCTGCTTTTGTTACGTGTGCATTTTCTTGTAATCCCGTCATTCTGGGATTTAATAATAAT
ASHG19A3A039080	654.988	716.827	9.2623	9.57298	noncoding	uc004bcw.2	BC039487	UCSC_knowngene	1005	chr9	+	108870331	109173662		TCCTGAGATGGCCCCGGCCCTGTTCATGTTACCTGTGTGTTGCTGAGTGGTCTTCTGTTG
ASHG19A3L0001608	98.1649	74.4055	6.54665	6.29589	noncoding	BF676882	lincRNA-ODZ2-1	lincRNA	884	chr5	-	167695838	167696428		GGAATTTTCTTGTGACCTGGGTGTGTGTTTTTGGAGGCAAATTGAGAGAGGGTTTGCACA
ASHG19A3L0002103	77.5595	105.99	6.1983	6.80485	noncoding	AI798958	lincRNA-TOX	lincRNA	471	chr8	-	60525376	60526334		TGCGAAGTGTCTTCTTAGCCACAAGTCTTCCATACTGCTACTTGCTACTTCTTCAATCTT
ASHG19A3A013636	454.172	454.118	8.73441	8.92333	noncoding	ENST00000455473	AC008280.3	Ensembl	307	chr2	-	54307110	54307417		AAGGTAGTCAGGAATCAATCTTGTGAAGCCCACGAAGGCTGAACATTCCCATCTCGATTT
ASHG19A3A053923	369.919	692.177	8.4397	9.52373	noncoding	ENST00000493458	AC009120.3	Ensembl	463	chr16	-	74346506	74347288		TTTGTGAGAACAGGGAAAACGAACCCAAGCTGCTGGAACCCAATCCTCTTGAATTAATGG
ASHG19A3A048492	94100.9	88269.3	16.5424	16.4211	noncoding	ENST00000484010	RP11-428G5.2	Ensembl	494	chr12	+	32101267	32101761	uc002iyr.1,ENST00000485633,ENST00000477007,ENST00000432629,ENST00000431782,ENST00000406939,ENST00000374520,ENST00000359713,ENST00000310055,	ATGTTGATGGCCACTACCCTCATGACATCATAGATGACATCAACAGTGGTGCTGTGGAAT
ASHG19A3A028514	59.3412	149.88	5.80683	7.31316	noncoding	ENST00000504259	CTD-2061E19.5	Ensembl	737	chr5	+	90676213	90734902		AGAAGACACCTGTATAAAAGGAAGAGGTCCCTATGAAGTGGTGATGGTCCATGAGGAAGA
ASHG19A3L0003015	101.175	69.2047	6.58994	6.19302	noncoding	CD365428	lincRNA-NFKBIA-2	lincRNA	622	chr14	+	35831437	35832834		AGTAATTCCATTGTCACATGTCCTGCAGCAATCCTGGAACACCACTCTGGGAAATAAGCT
ASHG19A3A040192	4004.99	3707.66	11.8912	11.9368	noncoding	ENST00000414193	RP1-164F3.8	Ensembl	469	chrX	-	100698685	100699154		GGGTGGTGACTTCACATGCCTTAATAGTTGATGGCAATTCCAACTATGGGGAGAAATTTG
ASHG19A3L0002943	205.156	132.188	7.59644	7.12889	noncoding	H65841	lincRNA-SPRED2-1	lincRNA	411	chr2	+	65501532	65501926		AACTATGGTGACAATTTAAAGGACCTTGATTCAAAGAATCAATTAAGGAGGCTGTCCTCT
ASHG19A3A046182	187.199	228.536	7.46389	7.91788	noncoding	AK123657		misc_RNA	2126	chr11	+	17402952	17405078		ACAACTTTCTCCCTGTGGTGAATGTGACACTTAGAACAAGGTGCAGCCCTACTAAAAGCT
ASHG19A3A021886	275.65	280.122	8.02347	8.21721	noncoding	ENST00000470444	RP11-12N13.3	Ensembl	350	chr3	-	165877808	165878158		CCCTTTACTCCCTATATTTGCTAATCACAACACAACGAGGAACACTTGTATATTACATTA
ASHG19A3A055255	192.437	124.335	7.50481	7.0407	noncoding	uc004dvh.2	LOC92249	UCSC_knowngene	2713	chrX	-	62646438	62780873		GCAGTTGGATGGCGGTGACTGCGTGGTCCTGCAACCCTGGTTCCAGTCTGGCAAGCATTG
ASHG19A3A035457	591.648	709.237	9.11405	9.55726	noncoding	uc003wqb.1	AK128880	UCSC_knowngene	577	chr8	-	2554055	2585957		GAGCTGGCTGGCCCATCCTCTCTTCTTTCCCTTGTTTTTCTATTTTATCTTTCAAAGCAG
ASHG19A3L0000406	1245.26	1580.12	10.1954	10.7098	noncoding	BC038545	lincRNA-C11orf30	lincRNA	444	chr11	-	76336942	76337878		AATTTGTTCTGATCCTAAGGTCACTATCCTTAATCCCTCTCCCTGTGGGGTCTTCCCTAT
ASHG19A3A041423	853.542	774.999	9.64696	9.68943	noncoding	ENST00000449911	CTD-2230M5.2	Ensembl	585	chrX	+	113625126	113625711		TTGTGAAGAGAGCATTTATGACCAGGTGGTGGAAGATCTAAATTCCAGAGAACAGGAGAC
ASHG19A3A029168	4834.6	4702.1	12.1653	12.2776	noncoding	ENST00000425455	AL592494.3	Ensembl	1550	chr1	+	121244141	121245691		CTGAAACACCATAAAGATGACGTTTCAATTGTCAAAACTGGAATGGATTGTGGTATCAAT
ASHG19A3L0000065	1339.92	890.525	10.3009	9.88312	noncoding	chr1:203164802-203174902+	lincRNA-CHIT1	lincRNA	10101	chr1	+	203164802	203174902		AAGAAGTGATGCTTGATGCCAAGTGGAGACTCTGACCCTCCCTTGCTTTCCTTATTTTCT
ASHG19A3A024077	96.1667	79.8145	6.51535	6.39626	noncoding	NR_026804	FLJ13197	RefSeq_NR	2368	chr4	-	38614321	38666249		TATTCTCAGGTGTGTTTAAGGGCTGCATTCCATGATGCTATCAGTGCCTTCTTTCAGCTC
ASHG19A3A040839	432.488	115.969	8.66492	6.9374	noncoding	ENST00000449263	AL121578.2	Ensembl	710	chrX	+	37765399	37808658		TTCATTCTCTGCGAGGTAGCAGATGTTTTACTGTAGCCTGAGTTGGGATCTTGGAACAAC
ASHG19A3A018199	151.212	140.84	7.15857	7.21824	noncoding	ENST00000503924	AL121583.1	Ensembl	4986	chr20	+	30940477	30945985		AAGCAGCTCAGGTTATCCTTCCTTTGAGGCCATTCTAGGGGGTCCCACAAATCTTTTTAA
ASHG19A3L0000318	166.267	274.121	7.29455	8.18462	noncoding	AW063279	lincRNA-GALNTL4	lincRNA	445	chr11	-	11665885	11666330		GGCAAATGACAACTCCACCCATTTGCACAGCATTTGACAGTTTTCACAGCCCTGTTTTTC
ASHG19A3A037244	13369.7	14933.7	13.637	13.9303	noncoding	ENST00000425356	RP11-54K16.2	Ensembl	484	chr9	-	33019679	33020163		TGAAGACTGTTGCCTGCTCCGAATTTCCCTTATCAACTTTCTCGACCATCTTTCTCTGGT
ASHG19A3L0003042	462.22	396.226	8.75776	8.7208	noncoding	chr14:77589570-77596097-	lincRNA-KIAA1737-2	lincRNA	6528	chr14	-	77589570	77596097		TATTTCCATCTCACCAAGATGTCTGTACTCCTGCTCTTTCCTTTGGCTAAAACGCTATTC
ASHG19A3L0002611	2606.51	2019.62	11.2571	11.0704	noncoding	BC043232	lincRNA-ZSCAN5A	lincRNA	2472	chr19	-	56732680	56879752	NM_024303,	TTTGAGTAAATATGTGTCCTCCCCACTGAGCTTTGTTTTCTGTTTCATTATGTCCATTGT
ASHG19A3A046829	393.717	414.573	8.53022	8.7898	noncoding	uc001pcd.2	AL832007	UCSC_knowngene	5341	chr11	+	86534418	86648860		TCTCTGCCTTAGCCCTAGATTTTTTAAAACCATATTTTAAAGCATGGCTCCCCTAATTAT
ASHG19A3A024717	106.785	136.464	6.66684	7.17377	noncoding	uc003igi.1	CR604304	UCSC_knowngene	1536	chr4	-	129489126	129491599	ENST00000514265,	GTTTCCTCAGTGCTTTGAAGATTTTTCTAAAGTCATCTGACTTGGTTTCCCTTTGATTTC
ASHG19A3A027912	76.4379	212.334	6.1764	7.81611	noncoding	ENST00000502001	RP11-480D4.3	Ensembl	1005	chr5	+	8457605	8460776		TGATTGGCCCCAGCTACCCTCGGACCGAGATTCCTATTGGTCCCAGGTGTCGAGCATGCG
ASHG19A3A008082	1650.67	1671.39	10.6007	10.7915	noncoding	CR595169		RNAdb	1493	chr1	-	173833394	173836186		GAAACAGTAGTTGGGAAATCTTTTAGAAATCCACCTATTACTACCTATTGGTAAAGGAGA
ASHG19A3A022402	3429.51	3354.57	11.6681	11.7849	noncoding	ENST00000427353	AC115283.1	Ensembl	400	chr3	+	31310498	31310898		CAAATGTGTAACAATTAGACCAAAAGGCATCCAGCTAGCACGTGGAGAACGTAATTAAGA
ASHG19A3A043293	223.613	256.257	7.72113	8.08596	noncoding	ENST00000445730	RP11-525A16.1	Ensembl	497	chr10	-	112188597	112255954		ATTGTCTGAGTGTGTCCAGTCCAGTTCCTGCCTTAATAAAAATCACTGCTGCAAGGGAGA
ASHG19A3L0002414	391.342	240.132	8.52136	7.98902	noncoding	BU568440	lincRNA-CALB1-2	lincRNA	787	chr8	-	91605017	91618291		AGAGTCAATGGTGATCTCAGTGATGCTTGTGGCTGGAATATTTTTTGTAATGAAAATAGT
ASHG19A3L0000225	74.6408	83.716	6.14323	6.46147	noncoding	BF667001	lincRNA-ST8SIA6	lincRNA	879	chr10	-	17509951	17510578		TTTAGGACCTTTCCAGGGGAAATCATTTGCTGGGCACTCGGGTTCTCCACTTAATGAATT
ASHG19A3L0002888	125.838	115.23	6.89577	6.92777	noncoding	chr10:74002486-74020610+	lincRNA-DDIT4-1	lincRNA	18125	chr10	+	74002486	74020610		TAAAAAGATAAAGAGGCAAATAGGTATGTAGGTCAGCTCAAAAATAGCCACCCACCCGCC
ASHG19A3L0000719	318.33	322.567	8.22739	8.42318	noncoding	DA728743	lincRNA-FOXA1	lincRNA	789	chr14	-	38503496	38663486		CCAAAAGTTAAAGAGGAAACTATCACCCCCTAAGAGGAAGCCAATATCATTTGTCACAAG
ASHG19A3L0001513	650.557	469.976	9.2537	8.96983	noncoding	AK296474	lincRNA-PPP2R2C-1	lincRNA	1780	chr4	-	6324670	6565327	NM_181876,NM_020416,	TCATTCACGTCCCTTCCTGTCTCGGTCTGCGGTCTTTACCACATCAATAGGACTTTTTAT
ASHG19A3A008480	425.59	178.178	8.64159	7.56338	noncoding	uc002ilc.1	CR602880	UCSC_knowngene	2080	chr17	-	45132466	45177627		TGTGTTTTCTGAAATACAGTCCCGCAGAGGGCAGTCTTGGGAAATTACTGTTCTCACACA
ASHG19A3A024490	278.917	279.165	8.03924	8.21179	noncoding	HIT000395606		H-invDB	386	chr4	-	93181518	93181902		TTGGATGGTTATTCTTAAATTCAACAGTGTACTCATGCATAACGCTCTCTCCTATTGGAA
ASHG19A3L0001743	512.525	416.346	8.90256	8.79577	noncoding	DB305613	lincRNA-AIG1-2	lincRNA	534	chr6	-	143675629	143676164		GAGAGATGATTGCCTCCTAAATATTGGTCTTGCTTCCTTCTTGCTTTTTCTTACATTTAA
ASHG19A3L0002000	184794	180655	17.5506	17.4175	noncoding	AK093407	lincRNA-FAM84B-5	lincRNA	1671	chr8	+	126625711	127132021	uc011mfi.1,	GGCATTTTGTAGATGTGGTTTGACTATTTCTGTATGTCTCCATCTATTGATGAGGGTCTT
ASHG19A3L0000166	96.614	78.3503	6.52334	6.37087	noncoding	DN918055	lincRNA-SGIP1	lincRNA	399	chr1	+	66890612	67423817	NM_001146113,NM_001146111,NM_001146110,NM_001077704,NM_001077703,NM_001077702,NM_001077701,NM_001077700,	TTCATGAACTTCTCAGCCTTTATGGTTATGGTAGTACTGTTCGACTACCTGAAGAAGATG
ASHG19A3L0000716	106.797	108.336	6.66705	6.83927	noncoding	DB311472	lincRNA-C14orf147-2	lincRNA	511	chr14	+	34456685	34457202		TGGGACTGCTTCTGATTTCTTCTCTTGGTTATACTCCAGAGGAGGATGCTAAATTTACTG
ASHG19A3A020283	678.979	892.337	9.31442	9.8853	noncoding	NR_026962	LOC284900	RefSeq_NR	963	chr22	+	28315363	28320950		GGCAGAATGAAAGAATTATGAGTGGAACTAGAGAATAGGAAAGACATGAACCAACGCCCA
ASHG19A3A055233	251.397	254.524	7.8918	8.07589	noncoding	uc003tdd.2	RP9P	UCSC_knowngene	1403	chr7	-	32956427	32982782		CTACAGCTATTCAACTGAGGACAGAGTAGTTATGAAAAACCTCCTCCTGGGCTTATCAAG
ASHG19A3L0000635	103.353	82.5563	6.61921	6.44155	noncoding	CA422183	lincRNA-MED4-2	lincRNA	681	chr13	+	48627460	48660591		ATTAGTTCTTGAAATTCCCCATCTCGGTGAATTAACAACTCCAGGACCTGGTTTTCCTCT
ASHG19A3A023150	2754.97	3485.74	11.3419	11.843	noncoding	ENST00000479610	RP11-59J16.2	Ensembl	697	chr3	+	127208395	127209630		AACAAAACTGGGATGAGAAGCTGGGGTTCCTCCCACCCCTCTCCAGGACCTGTGAATGTC
ASHG19A3L0003513	147.368	76.151	7.12	6.33054	noncoding	chr15:40446305-40450500+	lincRNA-BUB1B	lincRNA	4196	chr15	+	40446305	40450500		ATAAGGACAGAACATTATGTAACCCATTTCCTCAGGCCTCAGACCTATGGAGTCACATGC
ASHG19A3L0002171	641.334	779.794	9.23144	9.69748	noncoding	DB307684	lincRNA-C8orf37-1	lincRNA	518	chr8	-	96311901	96312419		AAATTTAAGGAACGCTGATAAACACTCTACTGTCTCACAGTTCCTCCCCAGCTGTTCAGC
ASHG19A3L0001460	82.7951	81.1093	6.29279	6.41868	noncoding	CX787170	lincRNA-MAD2L1-2	lincRNA	674	chr4	+	120923405	120924078		TGTTGCTGAGACATGTCTCATTCAAATCCACTGGTTCTCTTTACTTCCATACTATTCTTG
ASHG19A3A050377	98.4905	141.443	6.5506	7.22444	noncoding	uc001vlo.2	BC038529	UCSC_knowngene	1000	chr13	+	91145541	91187593		GTTTTTAAGATGCATCAGTTCCCCTTTCCAGCCTGAAGCCTCATCATCAAACAATGCTTC
ASHG19A3L0000329	215.98	378.975	7.67181	8.65857	noncoding	BI059095	lincRNA-UBASH3B-1	lincRNA	330	chr11	+	122276676	122276991		TCAGCTATCTATCTACTCCCCACAATAAATGGCTGGTCAGTTCCACGTTTAAAGTATCTC
ASHG19A3L0000612	1479.54	1683.64	10.4439	10.8028	noncoding	chr13:32382650-32393700-	lincRNA-RXFP2-2	lincRNA	11051	chr13	-	32382650	32393700		AGAAAAAATAAGAAGTTAGGAAATGTATATATGGACCCACCAGGGTTCTCATCTCCCCTC
ASHG19A3A030462	267.683	269.456	7.98365	8.16008	noncoding	ENST00000510677	AL360215.1	Ensembl	3298	chr6	-	119773711	119790879		GAGGATGGATTTTGAAGCATAGTTAAATGGTGTTGGCCATTTCCCCTCACTTTAATTATT
ASHG19A3L0003130	89.4985	88.4706	6.40736	6.53771	noncoding	chr3:25863830-25873380+	lincRNA-LRRC3B	lincRNA	9551	chr3	+	25863830	25873380		AATTTTCAGACTGTGCTTGGTGCATTGTTCTTCTCAAGTCTCTCAACGGTTCAGAGGAGG
ASHG19A3A046228	61.1297	115.354	5.8501	6.93002	noncoding	NR_033314	BDNFOS	RefSeq_NR	1478	chr11	+	27528398	27699348	NR_002832,	TATTGGGGGATACTGAGGTGAGCAGGGTATAAGTGGGGCAAGACTTTTCAGTGTAAACTT
ASHG19A3A050352	182.869	213.36	7.43209	7.82368	noncoding	ENST00000426437	RP11-49F20.1	Ensembl	1006	chr13	+	83397265	83398271		CCAGGTTGATTATATGGGACCAGATTCCTTTGACATCAAGAGGACACGTGACACTTACCT
ASHG19A3A052006	1046.59	855.982	9.94912	9.82981	noncoding	G36709		misc_RNA	463	chr15	-	39723159	39723622		GAACTATTCTCTGGATGCTTTTCCCCTTACGTTTTCCCCTTTATTGCCCTCATGGACAAA
ASHG19A3L0000006	260.52	182.569	7.94072	7.59644	noncoding	chr1:10911613-10923588-	lincRNA-CASZ1	lincRNA	11976	chr1	-	10911613	10923588		AAATTGCCACATTTGTAGATTATTGAGGTCTCACTAGCTGACTCACAGCCCCTCTGTCGA
ASHG19A3L0003200	311.647	181.661	8.19707	7.58908	noncoding	AW129555	lincRNA-DEPTOR-2	lincRNA	380	chr8	-	121073763	121074142		CTTTTAAAACCTGGGCTCACACTTACCCACACATTTTCAAAATTGAGTTAACAGGCCAAT
ASHG19A3L0002540	103.702	132.892	6.6237	7.13578	noncoding	DB445849	lincRNA-DYNC1I1	lincRNA	466	chr7	+	95306192	95306656		CTTAAAACTATTTGTGATTAAATCACCCCACATTGTCCTCTAGGCTCTAATGATTCTCTT
ASHG19A3A041084	4084.43	3377.66	11.9175	11.7967	noncoding	ENST00000455793	RP11-3D23.1	Ensembl	1077	chrX	+	61998719	61999796		GGATGCTTGTTGAAATTTTCGGGTGATTTACACATACTTTTCTCAAGTCATGGTGAAATA
ASHG19A3A031719	449.198	416.404	8.72024	8.79627	noncoding	ENST00000441363	RP11-398K22.12	Ensembl	2403	chr6	+	73973081	74011124		TTGCCCTTCATTCCCCATTTCTATCATAATCTACACAGAGTTTTGAACAGGCATTTTAAA
ASHG19A3L0001156	320.601	440.967	8.2382	8.88109	noncoding	AB058771	lincRNA-B3GNT7	lincRNA	3748	chr2	+	232127057	232238606		AAGATAGTCTTTTAGAGAAGTGGGGAGTATCCAACTTAGGGTCAAAATACACTGAGATTA
ASHG19A3L0001163	159.602	295.853	7.23744	8.29631	noncoding	chr2:235518511-235598161-	lincRNA-ARL4C-6	lincRNA	79651	chr2	-	235518511	235598161		AACATACAGGCAGCCAAACTTATTCAGGCCTCACTCCCGTTTCAATTACACTGTTGTTGA
ASHG19A3A048082	915.061	1262.51	9.74985	10.3905	noncoding	AK130597		misc_RNA	2295	chr1	-	91377811	91380107		ACTGCATGGTTCTTAGATTAGACCAGAAGTCAAGGTGAACAAAGAGTGCATATAATCTAA
ASHG19A3L0001476	701.31	613.302	9.3654	9.34955	noncoding	BU621051	lincRNA-PPARGC1A-2	lincRNA	726	chr4	-	24337862	24338571		TTTTAGGAGAAAATATCCCAGCTCGAGATGTACCTTCACCATCCCTGTCTCTTCTCAGCA
ASHG19A3A000462	528.578	428.258	8.95029	8.83923	noncoding	ENST00000506795	RP11-462C24.1	Ensembl	1136	chr4	-	109461323	109541585		ccttggcctcccaaagtgctggaattacagGAATTAGCCTCCTTACTGTCAGACCAGCCA
ASHG19A3L0003264	230.294	220.744	7.76192	7.87032	noncoding	AA595877	lincRNA-C16orf72-1	lincRNA	169	chr16	-	9578862	9579031		AACAGAATGAATTAGAAGAAGTTTCCTGTTCTGCCTCATGGAGTCTTTTCTTTCCCTTAT
ASHG19A3L0002457	760.949	579.492	9.48381	9.27063	noncoding	AW086055	lincRNA-PRRC2C	lincRNA	378	chr1	-	171562278	171562866		CAGGTTCTGCAGTCATCTGAATAAAATTATAGAGACATCCAGCACACTCCATTTAAAAAA
ASHG19A3A012948	547.503	292.963	9.00064	8.28188	noncoding	NR_024330	NCRNA00085	RefSeq_NR	2017	chr19	+	52196592	52208442		CTGGGCGAGCTGCTGGCCAGGCCCGAGGCTCTGACGCCCAGCAATCTGTTCCTGCTTGCA
ASHG19A3L0000207	301.912	272.033	8.15215	8.17355	noncoding	AI028364	lincRNA-PRLHR-2	lincRNA	449	chr10	-	120375174	120375612		TAGAAGCCAATCTTTGAGTCTCTGCCTCTCCAACGCCAAGGATCTTCATCTGTGAAATGT
ASHG19A3A049382	142.631	492.951	7.07092	9.04354	noncoding	uc001usr.2	CR592782	UCSC_knowngene	2567	chr13	-	30677365	30683005		TTGGAATGCATCCTCCACTTTAGCAAAAGAATTATGTGTTTTGTTTGCTCTTCATCATGT
ASHG19A3A026814	1143.69	1214.5	10.0742	10.3331	noncoding	ENST00000504349	RP11-155L15.1	Ensembl	1227	chr5	-	55609731	55617224		CTGCCTTTGATTCTTTCTAATTGTCAGGAAACTTGCACTCATAATCCCTCCTGCCTCTGG
ASHG19A3L0000831	409.224	295.042	8.58276	8.29281	noncoding	BU690073	lincRNA-CCDC33	lincRNA	416	chr15	+	74513616	74513896		TCCTGGAGACTCGGGAACTAAAACAATCAATTCCCCTGAGCAATAAAATTATGGACAGTG
ASHG19A3A008477	1556.86	3102.74	10.5183	11.6731	noncoding	uc010wkm.1	CR624169	UCSC_knowngene	416	chr17	-	45128651	45129168	ENST00000514828,ENST00000510581,ENST00000508811,	ATGCCAAGATGAGTTTGTCAGTATAGCCATATCCTGGAACTTATTTTGTGAGCTAAAAAA
ASHG19A3L0001125	497.383	436.471	8.86174	8.86717	noncoding	BX952962	lincRNA-OBFC2A-2	lincRNA	428	chr2	-	192564056	192564732	uc002ufj.3,	CTCTGGTTTTCAAAGGTAATATGGAATATTTGACACTTGGTAAAAGGTGAACTACCTTTG
ASHG19A3A015748	279.712	303.27	8.04325	8.33656	noncoding	uc010fcy.1	FLJ16124	UCSC_knowngene	1113	chr2	+	65663844	66299751		TCTGGGAGGAGAAGGAAGGAATTTATCTACCAGCTCCCATCTCTCATGGACCAAATTCTT
ASHG19A3L0003307	419.119	1428.9	8.61409	10.5686	noncoding	chr2:238206264-238224402+	lincRNA-COL6A3-4	lincRNA	18139	chr2	+	238206264	238224402		AATAAGTACAGGGATTTGAGCCGATTGTTCCATTGCATTCCGGTCGTCTCAGGAAAAGAG
ASHG19A3A016048	474.218	659.052	8.79499	9.45515	noncoding	ENST00000441036	AC104782.3	Ensembl	581	chr2	+	100859092	100865724		ACAGAAAATGCTGTGCTGGCCTGGCCCTCCCACAAACACTCCAGTTTCACGGGCTGAAGA
ASHG19A3L0002263	33699.3	12682.3	14.9856	13.7028	noncoding	AB002362	lincRNA-IGSF1	lincRNA	5413	chrX	-	130407484	130712873	NM_001170961,	TAACTCCTCACTGTACTGATTTACTGGCGCATGAAATTCTATTAAAAATGCATTCTTCTG
ASHG19A3A030667	119.021	104.381	6.81656	6.7825	noncoding	ENST00000427394	RP11-497D6.4	Ensembl	1821	chr6	-	147163701	147525676	uc003qlt.1,	GAAAAAGAGAATGCATGGCCAAAAATGGTGGTGCTCTCTGTCCAAAAACTGAGGCCCTAT
ASHG19A3A041103	2945.33	1825.94	11.4314	10.9287	noncoding	ENST00000430422	RP11-314A15.1	Ensembl	1160	chrX	+	65014186	65015677		GGAAATGGGAGCTGTAGAGTCTAATAGTCTATGAAAATCTGGATATAATGAGATATGTTC
ASHG19A3A013546	103.286	108.837	6.61825	6.84518	noncoding	ENST00000423797	AC006038.4	Ensembl	603	chr2	-	42592809	42652228		CAACTCTGTGCCACATCCTCTTCATTTTAGAATCCAGGATGAAGGATATGCCCTTATCTG
ASHG19A3L0001831	938.712	1197.58	9.78472	10.3132	noncoding	chr6:89272256-89285156-	lincRNA-CNR1	lincRNA	12901	chr6	-	89272256	89285156		TCAATTCTGGTCCAAATCTGTCACCTTTCTGGAAATTCTCCCTGTAGACCCCAATGTGTG
ASHG19A3A026260	76.5446	70.2201	6.1786	6.2132	noncoding	ENST00000510062	RP11-366M4.3	Ensembl	674	chr4	+	165798393	165820117		TAGTGAAGTCAGTGAAGTCTTCGGTCCCGTCCTGAATCATTTTTACCCTCTGTTTAGGGA
ASHG19A3L0002260	496.273	454.274	8.85843	8.9238	noncoding	chrX:128828944-128841419+	lincRNA-XPNPEP2-2	lincRNA	12476	chrX	+	128828944	128841419		ATTTTCTCTTTTCTTTTTAATAGTGTTGGTGGTTGTGCCTGGAGGTGAGACAGGGGAGGG
ASHG19A3L0001725	479.404	416.105	8.81143	8.79513	noncoding	T02983	lincRNA-LOC285733-1	lincRNA	500	chr6	+	130917299	130917789		AACTAAAACCAGGTAAAATTGGCTTCCTCTGGCTTCTCTGAGTCTTCTTGTGGGGTTCTG
ASHG19A3L0000028	228.962	196.226	7.75363	7.69938	noncoding	chr1:157444726-157458601-	lincRNA-ETV3-2	lincRNA	13876	chr1	-	157444726	157458601		CTATTGCTTGTGTGTTTGATTTGTCATATGGGCTTTCTCACCCTTGGTTATTAAAAGATT
ASHG19A3A016748	60.4769	581.076	5.83508	9.27414	noncoding	ENST00000413290	AC064834.1	Ensembl	989	chr2	+	196313255	196343649		GGACTTGGAAAGGCAGAAGAGAAGCAAGAGCCAGCATCCTCATCTTATAAACAGAAAAGC
ASHG19A3A051277	386.239	319.646	8.50417	8.40951	noncoding	uc010aja.1	TCRA	UCSC_knowngene	583	chr14	+	22392580	23016719		TCATTGAATTTCCAGAAGGCAAGAAAATCCGCCAACCTTGTCATCTCCGCTTCACAACTG
ASHG19A3L0002566	59.061	93.5727	5.80057	6.62027	noncoding	chr4:120932275-120933293+	lincRNA-MAD2L1-1	lincRNA	1019	chr4	+	120932275	120933293		CTTGACAAATCTAGATATTTACATCTTAGACAAATGACCCCTTTACGCTTACAGTCATCA
ASHG19A3A049798	370.372	263.326	8.4428	8.1256	noncoding	ENST00000454752	RP11-151A6.4	Ensembl	790	chr13	-	101189576	101232371		AGTCTGTGCTGCTTCCATAGGACTGTTCTCACTTCTTTCCATTTTGCAAGTTCTCAGCCT
ASHG19A3A028539	420.724	441.334	8.62062	8.88279	noncoding	uc003klp.2	FIS	UCSC_knowngene	2049	chr5	+	95187935	95195834		GGATTCTAAAAACTGACAACAAACCACTTACCCCTATTGCTCTTCTTCCTAAAGCTAAAG
ASHG19A3A013311	200.63	229.61	7.56193	7.92564	noncoding	ENST00000422415	AC010145.4	Ensembl	517	chr2	-	16137170	16203007		ATGCCTCTCAAGGCTCCTTTTCCTCCTTACAAACAAAATAAAACAAATCCTTCCTATGGA
ASHG19A3L0001653	313.398	189.344	8.20461	7.64559	noncoding	BX415539	lincRNA-MRPS30	lincRNA	932	chr5	-	44827705	44828637		GCTATCCACTTCCTGCCTTATTATACTAACAATATCCTGAAGCGTATAGAACTTTTAGTT
ASHG19A3A034136	220.43	146.895	7.7012	7.28132	noncoding	ENST00000414621	AC006027.2	Ensembl	230	chr7	+	30430523	30451991		AAACACTTGTCTGCTGTTTCTGTGGCCTGGCTGAGCCAAGAAAACATGTTAAAGCACAGA
ASHG19A3L0003246	1346.99	1188.58	10.3075	10.303	noncoding	AV730200	lincRNA-CNTN1	lincRNA	687	chr12	-	41510490	41511173		AGCTCCAATATTTATATCCCCTCCACCTCTACTGAGTCAATGCCACATTTTAGATTTTTT
ASHG19A3L0002589	1174.03	1230.65	10.1156	10.3524	noncoding	BX116989	lincRNA-RYBP-4	lincRNA	467	chr3	-	72610324	72631587		GAGAGGAGAGAGACCAGCAATCAGACCCTCCCAGAGACAATCATTGTTAACATATTGTGT
ASHG19A3L0000869	417.633	318.684	8.60903	8.40486	noncoding	DN604327	lincRNA-CDH11-1	lincRNA	160	chr16	-	65261807	65261927		TTCCCCAGCCTGGACAACACACTTCAAGAGTAAAACTTTGCTGTAAATAAATGAATCAAC
ASHG19A3A029312	143.37	119.531	7.07791	6.98357	noncoding	ENST00000404600	RP11-157J24.1	Ensembl	1589	chr6	-	1513935	1515524		ATTCATCCCCTATAAACTGCTCCAGAGCAGAGAAGGGTGTGGCTAGATTTGTGAGTATCA
ASHG19A3L0001891	61.3019	134.471	5.85446	7.15233	noncoding	DB061937	lincRNA-SHH-4	lincRNA	564	chr7	-	155855748	155856312		GGGACTCCTGATAAAGACAGCAGCCTGTCTGGAGAGACCCGTCTCACGCTCTCACTTTTT
ASHG19A3A011300	215.89	220.055	7.67112	7.8667	noncoding	BC045720		RNAdb	1844	chr19	-	28281401	28284607	NR_027301,	GTGGACATCTGTCTGGAGGAGCAATTTTACTGCGACATTTTAAAGAAACAAATTTAATTG
ASHG19A3A034481	107.261	134.499	6.6738	7.1527	noncoding	ENST00000455031	RP4-756H11.1	Ensembl	850	chr7	+	66021202	66022052		TGAAGGAGCTGGAGCAGGAGAAGGTGGTGCTGCTGCAGGGTTTGGAGATGATGGCGGGGT
ASHG19A3A020678	170.087	234.207	7.32516	7.95457	noncoding	NR_027007	LOC440944	RefSeq_NR	1907	chr3	-	9430536	9439174		GGGCCGCCTAGAGAAGAGGCTGTGCTTCGGCGCTCCGGCTCCTCAGAGAGCCTCGGCTAG
ASHG19A3L0001899	164.005	96.1603	7.27527	6.65995	noncoding	BF056782	lincRNA-ABCB5	lincRNA	511	chr7	+	20510663	20511322		AATGGATCTTCCTCTTCCTTATTCACCAGGCCCTGCCAATTCAATATTCAAGCAGACAAT
ASHG19A3A018873	2481.17	1801.7	11.1854	10.9052	noncoding	ENST00000423089	AP001434.1	Ensembl	438	chr21	-	39610148	39610586		ATCAAGCCTGCTCAATGCTCATCATGGATCCCTGTGAATTACGAAAACTGCTACATCCGT
ASHG19A3L0000783	63.8946	155.599	5.91905	7.36652	noncoding	CD365395	lincRNA-FLRT2-3	lincRNA	757	chr14	-	86450289	86596122		AAAGCACAATCTCCACTTGCAAAATGATGATCCAAAAAAGAGATGATGGTCAAAAATCTG
ASHG19A3A049414	749.685	788.72	9.45921	9.71155	noncoding	ENST00000421002	RP11-380B4.2	Ensembl	903	chr13	-	33451568	33485788		TGAAAGTGGACATTTTTGCCTTGACAACTCCATCTGCTCCTCCTCTATGAAAGCTCCATC
ASHG19A3L0001236	293.854	295.647	8.11358	8.29509	noncoding	chr2:88954435-88968860-	lincRNA-EIF2AK3	lincRNA	14426	chr2	-	88954435	88968860		AGGTCTATTGCATCATGCTGCCTCTCTGTTGCGATGCCACTGGCTCAGCCCTTTGTCCAT
ASHG19A3L0000493	230.89	173.653	7.76573	7.52383	noncoding	AI073577	lincRNA-PDZRN4-1	lincRNA	331	chr12	-	42157990	42159371		TGCCTGGAGTGAAAGCTTCTTTCTTCTCCTCATCTGTGGAACTCTTGTTTTAAGCTCTCA
ASHG19A3A014677	74.8793	66.8717	6.14826	6.14213	noncoding	ENST00000432925	AC073636.1	Ensembl	563	chr2	-	177710720	177714156		AGAAAATAGTTCATGGCTAGTCTGGACTTAGGACTTTAGGGTCGGCCTGGTGAATTGAAG
ASHG19A3L0001230	177.042	301.892	7.38409	8.32925	noncoding	DW462947	lincRNA-GNLY	lincRNA	365	chr2	-	85969367	85969715		TGATCAATTCATTCAGGCTGCTGCCTCCCGCTAAAAGACTTACTCTGTTCTCATTCACAG
ASHG19A3L0001028	2350.4	2549.92	11.1066	11.4103	noncoding	BU739232	lincRNA-TMEM182-1	lincRNA	670	chr2	-	103380796	103460297		AAGAAATTCCATCTGCAGCAATATATGAGCCTCCCCCAGCTTTGTAGAGAAAATGGCTGG
ASHG19A3L0000738	257.14	190.914	7.92415	7.65848	noncoding	CN274459	lincRNA-OTX2	lincRNA	631	chr14	-	57533725	57579378		AGCATTGCTTCCCTGTGATCTCTAACCCACCACAATTGAAATGACAAGCGTTGAAATGGG
ASHG19A3L0001976	62.0905	86.6344	5.8754	6.5092	noncoding	chr8:117615244-117625619+	lincRNA-EIF3H-2	lincRNA	10376	chr8	+	117615244	117625619		AAGCACCTTGGAGTCTGACACATGAAAGTTCTAATCACTGGTGAGCCATTGAGAATTACG
ASHG19A3A026017	76.2526	90.9582	6.17293	6.57714	noncoding	ENST00000509834	RP11-420A23.1	Ensembl	747	chr4	+	129214087	129396155		TTGACTGCTGACTTCTCACCCAAGGAAGTAACTGTATCCCAGCCTAATCTCAGTGGATAA
ASHG19A3A000285	5120.88	3438.61	12.2431	11.8239	noncoding	ENST00000444977	AP001434.2	Ensembl	287	chr21	-	39609138	39610123		TGTGGCCATCCCTGAGCACCCTGCCACCAGgaagctgaaaagaaggcccaggtgctccct
ASHG19A3L0002443	1016.52	936.184	9.90616	9.95254	noncoding	DB303228	lincRNA-MYSM1-3	lincRNA	551	chr1	-	59230418	59230967		AAATCAGTAATATATTCACATGGTTTAGTCACCTTCCTCCATCCTGCTGCCTAGAATGTG
ASHG19A3L0002289	131.246	88.7873	6.95568	6.54323	noncoding	chrX:36772104-36806404+	lincRNA-FAM47C	lincRNA	34301	chrX	+	36772104	36806404		TGACTCAGCATTCCTCTCTTTATACTATTTGGGGGCAGCCCAAAGTGACTTTGACACAAG
ASHG19A3A041623	158.941	92.1539	7.232	6.59667	noncoding	NR_028344	RP1-177G6.2	RefSeq_NR	1398	chrX	+	139791923	139796996		TACAGTGCACAAATTCATGTCACAAAAGACACACTCACCACACAATACAAATACTTGCTC
ASHG19A3A023987	109962	116777	16.7612	16.8176	noncoding	ENST00000487122	AC006427.1	Ensembl	248	chr4	-	16257930	16258178		TTTAAAACTTATGCTATCTGCGGGGCGATAGGATGGGTGAGTCAGATGATTCGATTCTCC
ASHG19A3A025251	630.893	612.98	9.2048	9.34894	noncoding	AK091382		misc_RNA	2368	chr4	+	8495637	8498002		AAATTATGCAAGCTTGGAAATCACTGCCTCATATCTCCTTCCAGAATCAGGAGCAGGCAG
ASHG19A3A033602	206.852	144.467	7.60855	7.25602	noncoding	AL365456		NRED	2596	chr7	-	137998747	138268686		TAGAGAGTCCAGCCACTTCCTGTTGTTGTTGCATAAGTTTCATGCGATGGTCCTTTGCAA
ASHG19A3L0000429	1977.19	2391.73	10.8581	11.3117	noncoding	CV396150	lincRNA-TXNRD1-1	lincRNA	296	chr12	-	104762832	104763108		TTACTGTGTCCAAAAGGGATGTAATGACCTTGCCCTCCTTCTGCCTGTGTAAATGCTTGT
ASHG19A3L0003115	103.408	126.979	6.6201	7.07336	noncoding	BU732707	lincRNA-FLJ37543-2	lincRNA	601	chr5	-	61109600	61110260		CATAGTGATATTGCATAATAAGTAAAAACCAACTGCCTAAGTTAAAATTCCCCTCGTGCC
ASHG19A3L0003545	499.294	483.175	8.86617	9.01307	noncoding	chr20:48363997-48385346+	lincRNA-SLC9A8	lincRNA	21350	chr20	+	48363997	48385346		GGTTTCTCTTTTTCATCTCACTGCTCTGTCTCTGATGTGGCTTCATTCTCAGAGGATTGT
ASHG19A3A046914	86.5358	74.6833	6.35484	6.30163	noncoding	G65617		misc_RNA	454	chr11	+	107182884	107183338		GTCATGTAATAAAACAATCTTCACAGTATTTGTTCTAAAAAGTGGTTACAGCCCATGTCC
ASHG19A3L0002579	93.6258	73.838	6.47418	6.28407	noncoding	AW274044	lincRNA-PLXNA1-1	lincRNA	421	chr3	-	127258337	127259328		TAAACCGGCAGGTGTCTACTCTCAGGCTCTGGTCGAGATGCAGGCTGAACTTCTGGGATG
ASHG19A3A039563	96.2185	95.0261	6.51605	6.64212	noncoding	ENST00000438499	RP11-1M18.1	Ensembl	517	chrX	-	6585905	6639585		TAGAGATTAACCCTTTCCTGGAAAATGAACGTCTATTGCTTCTTTTGGGGACAGCATGCT
ASHG19A3L0003479	94.9392	71.3935	6.49646	6.23655	noncoding	AL599814	lincRNA-ITGA6-1	lincRNA	655	chr2	+	173254424	173255061		GACAAAGCAAGTTTTGTGTACAGGAAACAACGGCTTCCCTTCTCCTTTGGAGGATCTAAA
ASHG19A3L0001717	237.804	208.098	7.80787	7.78693	noncoding	DB525109	lincRNA-CENPW-1	lincRNA	483	chr6	+	126397593	126398803		AAGAGTGACTTTCCTTTAACTTTGTCATCACTACAGCATCCAACCTGCCCTGTTCCAGAT
ASHG19A3L0002954	275.555	147.162	8.02295	7.28458	noncoding	BF245637	lincRNA-C17orf103	lincRNA	825	chr17	-	21178547	21179156		TAAAGGTTGAAGACGATCACCCACCCATGTTTTCCCAGCAAGGAACAGGTCTTGCTTTAT
ASHG19A3L0003325	846.647	603.104	9.63484	9.32675	noncoding	CF128868	lincRNA-DLL1-2	lincRNA	705	chr6	+	170349016	170349726		ACAGTTCGCATGCTTCTGAGGGAAAGAACCTATCCCTCTAGTTCCCAAATGTGTAGTCAA
ASHG19A3L0001016	70.6547	107.984	6.06426	6.8334	noncoding	BI029614	lincRNA-ERF	lincRNA	493	chr19	-	42777698	42778182		TTTAGTCACACCAGAGTCTAAGCTGTCACTCTTGGAAAGTCTGGGGCGGCTCCTCCACCC
ASHG19A3A019258	149.004	91.2073	7.13805	6.58018	noncoding	ENST00000416842	AP001042.1	Ensembl	487	chr21	+	40218170	40220568		AGACTTGGGCAAACTCTACTCCTCAATTTGTGGAAAAATCTCAGTATTGATCTATGCATG
ASHG19A3A022106	163.18	125.679	7.26765	7.05786	noncoding	uc003ftp.3	BC038368	UCSC_knowngene	2666	chr3	-	193766708	193787318		TTAAAAGAAGTGAAACTTGTAGATATAGCTAGGGCTCCCCGTGTCCACTCACTGAAGTCC
ASHG19A3A045880	147.336	99.4757	7.11976	6.71047	noncoding	AK124423		misc_RNA	3991	chr11	-	130736151	130740142		TTGCTACAGTAACCAGCTAGCTCCTGACTCCAATGCCTGTCTAATCTAAGGTGGAAATGT
ASHG19A3A022805	825.112	613.442	9.59993	9.34983	noncoding	uc003dpd.1	AK055831	UCSC_knowngene	2693	chr3	+	72200407	72223483		ATCTTCCCTTCCAACGAATTCCTGCTCAGGCCAGCAAGGAAGAGAGTTTGAGTTGTTTAT
ASHG19A3L0001791	124.136	101.722	6.87745	6.74267	noncoding	chr6:34524172-34539872+	lincRNA-C6orf106	lincRNA	15701	chr6	+	34524172	34539872		AGAAAAATGGAGGCAGGGCAGGGGCTGTGCAGTAGCAGAACTGATTGGCCTGCTTGACCA
ASHG19A3A050871	128.248	110.027	6.9235	6.86007	noncoding	ENST00000418607	BX004987.7	Ensembl	964	chr1	-	143527404	143533272	ENST00000445662,	CCACAGTGGATTAGTGGATATTACAAAACCTCTGGTCCCACCTCATTAAGATGGAAAAAA
ASHG19A3A048117	268.688	345.61	7.98815	8.52394	noncoding	NR_002809	LOC338799	RefSeq_NR	1521	chr12	-	122233173	122241390		TTTTTTGCATTTATCTTTTCCTTCCCCTTTCTTTATTAAAGGTCCGGGAGTGGCGGCGGC
ASHG19A3L0000694	189.143	176.458	7.47882	7.55007	noncoding	chr13:95301199-95328649-	lincRNA-GPR180	lincRNA	27451	chr13	-	95301199	95328649		AATTGCCCTTCTTCATGTACTTTCTGTTTTAATTCATGACACACTCTCTGTGGTAGGCAG
ASHG19A3A035061	442.118	317.252	8.69573	8.39892	noncoding	AY927588		misc_RNA	1178	chr7	+	129415052	129416229		TGATGAGGTGGTGATCTCAGGAAGTCACTCCTCAGCCTTCTGCCTCAGTTTCCCTTACTA
ASHG19A3L0002062	147.997	86.182	7.12669	6.50153	noncoding	BX090019	lincRNA-SLC25A37	lincRNA	743	chr8	+	23351083	23351826		TGGCTCACCCATCAAATCCAACTGCTTTATCTAGAAAATACTTTTCTCCATTCTCATTTC
ASHG19A3A050860	59.9184	97.6963	5.82258	6.68227	noncoding	ENST00000443548	BX004987.4	Ensembl	681	chr1	-	143356064	143467532		GGGGGGCCAGACCAGTGTTCCCCATTTGTGGGGGCAGACGCGTGGGCGCATCGCGGGCAG
ASHG19A3L0003468	176.922	129.546	7.38316	7.10142	noncoding	chr2:159810159-159821179-	lincRNA-DAPL1-1	lincRNA	11021	chr2	-	159810159	159821179		CCAGAACCAATCTCTAAACTTGACAGACTTTCCACTTTTGCCTTTTGTGATTATTTGAAA
ASHG19A3L0001250	249.73	234.227	7.88159	7.95472	noncoding	chr20:29804014-29834814+	lincRNA-DEFB115	lincRNA	30801	chr20	+	29804014	29834814		TTTTCAGAGTTAAAATATTTCCGTGCAAGCTGCCTCATGCCCCAAACACTGCTTTTGCCC
ASHG19A3L0000236	156.736	153.059	7.21052	7.34236	noncoding	chr10:31568469-31585244+	lincRNA-ZEB1-2	lincRNA	16776	chr10	+	31568469	31585244		GTCTATAAATATACATAAATCAGTTTTTGAACTCTCCTTTCTGGTTCATTAGCCTTTTTT
ASHG19A3A021887	40924.9	36789.2	15.2682	15.2194	noncoding	ENST00000435146	RP11-12N13.6	Ensembl	291	chr3	-	165878201	165878492		GCCTTGCCTTACTAGTTTTAATCTCCAACACATATGGCCTAGATTATGTACAAAATCTAA
ASHG19A3A038426	155.394	121.513	7.19724	7.00739	noncoding	AK091174		misc_RNA	2350	chr9	+	21930388	21932738		TGATAATGGAACTAAAAATGTACGTTGACTGACTTAACTCCAACTGCTTCTTCCCTCAAT
ASHG19A3A016889	84145.9	92338.2	16.3662	16.4692	noncoding	ENST00000440360	AC079767.3	Ensembl	171	chr2	+	208519504	208519675		AAGTGCAGCCAGTGTTTCCGTCAGTATGTGAAGGATATCGGTTTCATTAAGTTGAACTAA
ASHG19A3L0000209	1746.67	3167.34	10.6884	11.7023	noncoding	AK097728	lincRNA-PRLHR-1	lincRNA	1798	chr10	-	120433633	120514558	NM_153810,	CTCAGGAGCTCTGTCACAAAGCTGTTCATGGAAGAGGATGTTGGACTTCTTACTTGCTTT
ASHG19A3L0000113	219.776	169.511	7.69688	7.48968	noncoding	chr1:30142313-30155538-	lincRNA-PTPRU	lincRNA	13226	chr1	-	30142313	30155538		CTGCTAATTCAGTGCCATCTGCCTGCGTTCTCAGGACCAAAGCCCTGGGATAAGCATGTT
ASHG19A3L0001998	209.814	251.129	7.63127	8.05641	noncoding	CD676340	lincRNA-FAM84B-3	lincRNA	634	chr8	+	126479180	126553604		ATTACTGTTTCCTAATCTAGGGAGCCTCTCAGAAAAGACTCCCCTGAAGCGATTGGTCTT
ASHG19A3L0002760	271.169	368.887	8.00069	8.62327	noncoding	chr15:74197716-74198633+	lincRNA-LOXL1-2	lincRNA	918	chr15	+	74197716	74198633		TTTGTCTCCATAAATTTATACTCTCCACTGCCTTCCCAGGAAGCTGAGTTCTGGTCACAG
ASHG19A3A044037	290.305	208.458	8.09833	7.78884	noncoding	AL080082		NRED	1026	chr10	+	70459545	70460550		TTTGGTGCACAGCAGGTTGTACATGATTTCATGTTTATGTAGCAAAATGCATTGAAATGT
ASHG19A3A055237	2594.42	2737.75	11.252	11.5026	noncoding	uc003uip.3	P53TG1	UCSC_knowngene	659	chr7	-	86954665	86974831		GGCAGGCCGCGCTCCGCCCACGAAGGTCTGGCTTACCACACGCTCCTCCCCATTCCCAGT
ASHG19A3L0002657	147.511	153.626	7.12164	7.34761	noncoding	chr8:30192504-30200352+	lincRNA-RBPMS-2	lincRNA	7849	chr8	+	30192504	30200352		TCATCCATACATCCAAACTTCAGAGGTGCTTTGTCAGGCATTTTTCACAGCTTCTCCCTT
ASHG19A3L0000411	6702.6	6467.9	12.6256	12.7372	noncoding	chr11:8215149-8227449+	lincRNA-LMO1-2	lincRNA	12301	chr11	+	8215149	8227449		AATTTGTATATTTAATTCTCCCTCTCCCAGGTGGGAGCCTGTGTTAAGACACAGCCAAGG
ASHG19A3A034495	492.071	289.821	8.84479	8.26491	noncoding	uc003tvu.2	BC017910	UCSC_knowngene	487	chr7	+	66800962	66805009		CCTGAGAATGGGTCATTTGCAAAGTAAATAAAGGCAATGCCAAACGTCAGTACAACAAGC
ASHG19A3A011339	660.693	654.933	9.27586	9.44514	noncoding	uc002nwh.1	DQ593116	UCSC_knowngene	118	chr19	-	35306610	35306728		CTAAGGTGCTGCATGCCCCTCTAGGCCCTGTTCTAAAGCTGAGTGCTTCAGATGTGGAGC
ASHG19A3A041412	2253.03	2646.23	11.044	11.4587	noncoding	ENST00000438679	RP5-1065P14.1	Ensembl	415	chr1	+	229177917	229178332		CAGTGAGTTTTTGTTCAATAACCCAAACATCAAAGGAACTTGTGGCTGTCGAGAAACCTT
ASHG19A3A013368	326.028	264.635	8.26193	8.13424	noncoding	ENST00000441338	RP11-278H7.4	Ensembl	468	chr1	-	244232121	244256328		AAAGCGATGGTCCTTGGTGTGCCACTTCCTGTTGAAGCTGCCTGTCTACCAGAATTAGCC
ASHG19A3L0001382	179.799	138.482	7.40486	7.19628	noncoding	chr3:39278546-39291596+	lincRNA-CX3CR1	lincRNA	13051	chr3	+	39278546	39291596		AATTTCCTAGACTGTCTCATCCTGGGCCATGTTCCTTGAATTAGAAATAGAAGGGAGGGG
ASHG19A3L0002908	411.316	820.129	8.58958	9.76904	noncoding	AA628127	lincRNA-PRDM14	lincRNA	354	chr8	+	70946291	70947002		GAAAAACGTTATTTTAAATATACGGAATTTGCTCCTCTCCAAATCCACTCTCCCTTTCGC
ASHG19A3L0001936	191.842	123.143	7.49957	7.02822	noncoding	BM565532	lincRNA-CACNA2D1	lincRNA	599	chr7	+	81447647	81448245		GCCTCCTGCTTCTACAGATTTTTTCATAGTTATCTCTCATGAGAATCTGCAATTCTTGTT
ASHG19A3A043448	239.569	257.248	7.81856	8.09126	noncoding	uc010qus.1	EU250747	UCSC_knowngene	2229	chr10	-	131862603	131909081		AACAGTCTGACCTTGTACTGTGCTTACTGCTTGAGGTATACCTTCCCACCTCCAAAGATT
ASHG19A3L0001287	175.762	138.27	7.37299	7.19433	noncoding	BU662692	lincRNA-ADAMTS1	lincRNA	685	chr21	+	28066289	28066965		CCTCTTCACTCCTTTTGCTACCCAAGTGACGTATCATACAGCAAGCTAACACTTGGTAGA
ASHG19A3L0000244	194.499	203.273	7.51934	7.75286	noncoding	chr10:44737519-44749219+	lincRNA-CXCL12-4	lincRNA	11701	chr10	+	44737519	44749219		AGAAGACATTGCTCATAATCCCCTGTCAGCACAAGAGTCTGCCCAGAAATAGAAACACAG
ASHG19A3A020212	216.13	111.622	7.67257	6.88153	noncoding	ENST00000439492	AP000350.6	Ensembl	1763	chr22	+	24269086	24271761		TGAACATTCCTGATGAGACAATATTGACTCCACTTCTTACTTGGGTCTGTCATGATTTGG
ASHG19A3A008245	532.304	312.309	8.96211	8.37754	noncoding	ENST00000426575	RP11-318C24.2	Ensembl	657	chr1	-	175873897	175889649		CCTGGCTGTTCTGTTCATGACGGTGGTTATTCCAATTACTTTGAGAATTATATTTATTAG
ASHG19A3A045655	411.416	387.091	8.59043	8.68931	noncoding	AK125021		misc_RNA	4140	chr11	-	107182857	107186997		TAGTACTGGGCATCACATGCTGCTTCCCTTTGTGGCTTTGAATAAACCCTTATTTTCTTG
ASHG19A3L0000154	319.814	290.697	8.23372	8.26899	noncoding	exon101+	lincRNA-CDCP2	lincRNA	233	chr1	+	54593101	54593333		AGAAGCAGCCAGTGCCATCTTGGTGCCTTAAATAACTTCCCAGCCTGTCTTTCTAACATT
ASHG19A3A016677	260.922	235.89	7.94378	7.9643	noncoding	ENST00000454208	AC092640.1	Ensembl	705	chr2	+	179866482	179867487		AAATATGCCAGGAGCAGATTTTCAAGAAAAGCAGCCTGTCCTCTCCAAGAGCGTCTACTT
ASHG19A3L0003280	105.332	88.6727	6.64654	6.54121	noncoding	chr3:193447028-193465304-	lincRNA-OPA1-2	lincRNA	18277	chr3	-	193447028	193465304		TTTAAAGTATATATAATTATGGTCTTCCTCGTGCAAGAAGTGGGGCTGGGGCTCCATGGG
ASHG19A3L0000723	1351.63	1621.55	10.3132	10.7501	noncoding	BC043513	lincRNA-FSCB	lincRNA	916	chr14	+	42881775	42998089		AAACTGCTCATCGTTTTCTTACTCTGATTTCTTTCTCCCTCTGTTGTTGCAAAGATAAAA
ASHG19A3L0002474	2738.72	2662.03	11.333	11.4663	noncoding	AK026910	lincRNA-CROCC	lincRNA	1883	chr1	+	17066767	17270032		AGGATATGGGACCGAAGCCTGAGAGTTAGGTTTCCACTCCCTTCCTCTGTGCCCTCACCA
ASHG19A3L0001595	208.571	353.16	7.62091	8.55547	noncoding	AK225978	lincRNA-SPARC	lincRNA	1520	chr5	+	150632684	151084743	NM_001167607,NM_000405,	TGACTGATAAGAACCGTGAGAAACATGTTGCTTCCAGGCTTGATTTCGATTTTTCGCTTT
ASHG19A3A026010	1936.78	2504.77	10.8306	11.3791	noncoding	AK090904		RNAdb	2547	chr4	+	128759331	128761879	uc003ifn.2,	GCATCTTTATGCTAGTGAACAAAGTAGCAATAAATGTTCATTTTTGGATGGCAGTACACA
ASHG19A3A030996	24292.6	29046	14.494	14.8812	noncoding	ENST00000405924	RP3-451B15.3	Ensembl	140	chr6	+	12319684	12319824		AACAGACACACCCTCACAGTTGGAAATGGAGGATGAAGATACAATTGATGTGCTCCAGCA
ASHG19A3L0000849	83.3828	96.662	6.30271	6.66665	noncoding	chr15:88215746-88230771+	lincRNA-NTRK3	lincRNA	15026	chr15	+	88215746	88230771		TAAAGAATAAATGGCATAGTGCATGAGAAAGTCACTGGCTGGATTCCTGGGTGCTAACTG
ASHG19A3L0002417	106.976	148.503	6.66976	7.29822	noncoding	BE048920	lincRNA-FBXL4	lincRNA	329	chr6	+	99293092	99293421		AAGTGGGGCCAGGGGCCGGGAGGTTGGGCGGGGTCTATGGTTTGTATGTGTTGGGTGGCG
ASHG19A3L0000144	769.405	796.355	9.49954	9.72523	noncoding	exon95+	lincRNA-KNCN	lincRNA	271	chr1	+	46997334	46997604		GTGATGTCAGACTGTTACCCAAACGCTGCCACTCCCCACCTCTTACAGGAGCCAGGCAAT
ASHG19A3L0000610	1827.64	1268.5	10.7489	10.3982	noncoding	AK122825	lincRNA-HMGB1-2	lincRNA	4200	chr13	-	31032883	31191734	NM_002128,	CTGAAAAATGAAATTTGTGTGTCCTGTGTACCCGAGGGGTAATGATTAAATGATAAAGAT
ASHG19A3L0001478	73.3623	99.2409	6.11744	6.70663	noncoding	AA583819	lincRNA-LGI2	lincRNA	257	chr4	-	25090390	25090645		ATGGGGAGAAAATGCTGATATTTGGATTCTATAAATATCTCGGCCTCCTGAGCGAGCAGC
ASHG19A3L0002576	197.933	277.9	7.54355	8.20532	noncoding	chr2:72079817-72089167+	lincRNA-CYP26B1	lincRNA	9351	chr2	+	72079817	72089167		TAGTGTATCTTGTTTTATAAAGATATTGGGGCAGTGTGCCCGCTCCCTGCTAAGAGCTCT
ASHG19A3L0003150	86.9136	110.202	6.36138	6.86165	noncoding	chr8:10448515-10454758+	lincRNA-RP1L1	lincRNA	6244	chr8	+	10448515	10454758		ATTATTTATTATGTCCTTGCCGTGCCTATGATCTATGGAGGGGCACTAATCTCCGAGCAG
ASHG19A3A050269	569.282	216.022	9.0531	7.84009	noncoding	ENST00000437705	RP11-248N6.2	Ensembl	862	chr13	+	68485218	68486080	ENST00000503990,ENST00000463158,ENST00000445529,ENST00000426212,	TGGTTTGCTGATTTTATGGAACAGGCGTTGGAGGGTACCTCAGTTCAGATGTGTCATCTT
ASHG19A3L0002356	1989.59	1943.21	10.8669	11.0173	noncoding	BF336285	lincRNA-PRSS48	lincRNA	402	chr4	-	152243990	152244383		GAACTCTTCCTTCTCTCCCTGATAAATTTTGGAGTGGTTGTGTAAGTGCATTTATTTATT
ASHG19A3A039092	43524	37770.6	15.3693	15.255	noncoding	ENST00000306634	RP11-220D10.1	Ensembl	318	chr9	+	111389112	111389430	NM_033643,NM_015414,	ATGGAGCTACTGAAGGTCTCCAAGGACAAACAGGCCCTCAAATTTATCAAGAAAAGGGTG
ASHG19A3A018205	1376.64	1214.07	10.3379	10.3325	noncoding	ENST00000413983	RP11-410N8.3	Ensembl	469	chr20	+	31148894	31161690		ATAAAGCCTTTCACCCCTAGCCTGCTCCTGTCTCAACCTCAACCTCCAGAGAACATCCAT
ASHG19A3L0000591	3590.24	2731.31	11.7364	11.5009	noncoding	CD102777	lincRNA-TPTE2	lincRNA	752	chr13	-	20179522	20180277		GAAACAAATAATGGCCAAAAAACTTCCCTCCCACTCTTTTATGCCTTTTTACACATTCCA
ASHG19A3A010671	484.903	522.644	8.82639	9.12473	noncoding	ENST00000470049	RP11-727C1.1	Ensembl	468	chr18	+	53303077	53303545		AAGAGGAGAGGCACCTGTGCTATTTTCTCCAGCCTTTTAGAAAACATGGTGTTGTTCCTT
ASHG19A3L0000277	119.406	139.865	6.82078	7.20943	noncoding	BX508282	lincRNA-KCNMA1-2	lincRNA	808	chr10	+	78326700	78327512		TGACCTATTGGGCCTTGACACTTTTACTCAGACTTTCCTCAATCTTTAGATGTCCCCGGT
ASHG19A3A027092	3665.39	4216.05	11.7668	12.115	noncoding	NR_024383	LOC645323	RefSeq_NR	3360	chr5	-	87960263	87974262		ACCCACCCTCTTCCCCAACACCCACCTAGCCAGCGAGTCACCGAGCCACCGGCCCTCGGG
ASHG19A3L0000062	108.64	99.6406	6.69128	6.71308	noncoding	EG328292	lincRNA-TMEM183A	lincRNA	169	chr1	-	203015439	203017725		TTCTTCAGCCTTGGTGAGGGCTGCAATTCTCTGGGCCAGCTCAGCCTCCACCTCTGGCAG
ASHG19A3A016891	10712.4	10880.4	13.3138	13.4835	noncoding	ENST00000426284	AC096772.4	Ensembl	444	chr2	+	208546313	208546757	NM_138689,NM_001031801,	TACAAACCCACAGAGACCTTCATCTCTGGCCTGCTGGACAAGATCCGGGGCATGCAGAAG
ASHG19A3A018941	74.9986	174.88	6.15035	7.53374	noncoding	ENST00000424933	AP001631.9	Ensembl	422	chr21	-	44560632	44561202		CTCATCTCCAGACCTGGAGCAGCTGCCTGCCCCAGGGCAGAAGCCACTGCCCGCAGCTAG
ASHG19A3L0000535	75324.2	68582.9	16.1928	16.0768	noncoding	EC557833	lincRNA-SLC6A15	lincRNA	100	chr12	+	85065864	85065912	NM_004255,	GACATTGCTACTTGAGTGTGAACAGTTACCTGGAAATACTGATGATAACATATTACCTTA
ASHG19A3A007101	71558.7	67735.3	16.1136	16.0581	noncoding	NR_002578	GAS5	RefSeq_NR	651	chr1	-	173833039	173837125	ENST00000430245,	AGGCAGACCTGTTATCCTAAACTAGGGTTTTTAATGACCACAACAAGCAAGCATGCAGCT
ASHG19A3L0001602	507.852	480.79	8.89069	9.0055	noncoding	chr5:158080172-158099447-	lincRNA-CLINT1	lincRNA	19276	chr5	-	158080172	158099447		TCATCAAAACTTGCTTTTCCTGTGTCCCATTTCCTCCACAACTGATACCTGCTAATATAT
ASHG19A3L0002806	88.9661	93.0274	6.39792	6.61237	noncoding	chr3:46129526-46140202+	lincRNA-CCR1	lincRNA	10677	chr3	+	46129526	46140202		TTTCAACATACTTCCTGCTTTTCTTGCAAAACAGAGAAGACTCACTCCTCTGTGGGAGGC
ASHG19A3A040709	6662.87	6477.11	12.6181	12.7399	noncoding	AK095608		NRED	2784	chrX	+	15719056	15721845		CTGGGGACAGGAGGCATGCTTCTCCCCAGTTTCCACAATAAAATATTTGTTGTTAATAAT
ASHG19A3L0002424	196.106	190.455	7.53195	7.65492	noncoding	chr9:33081447-33083405+	lincRNA-B4GALT1	lincRNA	1959	chr9	+	33081447	33083405		AAGGAAGTAAGATTTTCCCCCGGGTATTGTTTTTCTTGTTGACTCTGGTCACTGTGGTGC
ASHG19A3L0000405	77.9149	91.3973	6.20431	6.58321	noncoding	BF513755	lincRNA-PRKRIR	lincRNA	493	chr11	+	75970861	75971353		GATTCTGGCACAGACAGCCCTGGCAAAGCAGTAAGGTGCCCCTGAAATCCACCACTCGTT
ASHG19A3A028650	24042.1	25866.4	14.4758	14.7195	noncoding	ENST00000502314	CCT5P1	Ensembl	1618	chr5	+	114847773	114849391	NM_012073,	CAAATGGTTAGAATGATTTTGAAGATTGACGACATTCATAAGCCTGGAGAATCTGAAGAA
ASHG19A3A041604	1393.86	1145.77	10.3565	10.2485	noncoding	ENST00000431464	RP11-308D16.4	Ensembl	646	chrX	+	135991633	136103777		GCCCTTGAATATCTGTATATCTATATGAACATCAATTGAGATATATATGTGTGTGCCCCT
ASHG19A3L0001697	96.0679	130.493	6.51413	7.11097	noncoding	BM674971	lincRNA-GRIK2	lincRNA	480	chr6	-	105161864	105162329		TTGTTGTTATGAATTCTTTACATTGAGGTCTCTTATTAGACTCCCCGGCTTGGGCAGGCC
ASHG19A3A027347	656.807	654.215	9.26625	9.4439	noncoding	uc003kuo.2	FLJ33630	UCSC_knowngene	1870	chr5	-	127276134	127419299		TTTTTCCCCCCGCTTTGGTGAACTCGCAGTACTTGGGCTGAGCCCGAAATCTCGCGAGAT
ASHG19A3A033570	190.387	194.528	7.48869	7.68587	noncoding	AK024938		NRED	1864	chr7	-	132384193	132644331		ACGTGCCAACTGGGCTTTTCATTTTCAAAAGTTTATTGAAGAAAGAAAATTGAGGGCTGG
ASHG19A3L0000709	103.757	109.153	6.62433	6.84847	noncoding	DA538556	lincRNA-C14orf180-1	lincRNA	570	chr14	+	104767792	104768362		TTTCCTGGACTCACGACGGTGCTGTGATGAGCTGGTGGCCACATCTCCATTTCACACAGG
ASHG19A3L0002206	483.201	554.269	8.82225	9.21101	noncoding	chr9:137160729-137173954-	lincRNA-WDR5-2	lincRNA	13226	chr9	-	137160729	137173954		AAACACACACACACACACACAGTCTTGAATCCTGCTCTCGGGGTCCGTCTCAGGCACTGT
ASHG19A3A029662	168.899	166.331	7.31456	7.46116	noncoding	NR_024052	HCG18	RefSeq_NR	6814	chr6	-	30255173	30294927		TCCTGTGAATTCTATGCTCTAGCTTGGGTTAAGGGATTTGGAATTGCACTTGTTTCAGAG
ASHG19A3L0000799	120.13	100.14	6.82906	6.72014	noncoding	H50552	lincRNA-FAN1	lincRNA	411	chr15	+	31174132	31174427		TACTAACGAGATATACAATCCAGCCACCCTGTCCAAACTGGGAATCTGATTACTAATGGG
ASHG19A3A028563	67.6826	77.2395	6.0016	6.35124	noncoding	ENST00000513175	CTD-2007H13.3	Ensembl	478	chr5	+	98264874	98330717		CAAGTAGAGAATTGGGACCAGGAAAAATAAAGCCATGAAATAATGAGTCTGCTGTATTAG
ASHG19A3L0002401	210.306	204.373	7.63456	7.76021	noncoding	AV730760	lincRNA-LPAR3-2	lincRNA	603	chr1	+	85219477	85220132		TGACAACTCAAGTCTTTAGGTGATGCTGAAAAGCCTGCCCTAGCTTCTCATTTCCTTCGT
ASHG19A3L0002794	68.482	70.0925	6.01966	6.21063	noncoding	chr3:140465232-140468555+	lincRNA-SLC25A36-3	lincRNA	3324	chr3	+	140465232	140468555		GCTATCCACATCTTCTAGACTGAATCATTTTTGGGGCTCACATGTTGCCTTTCCATAGCT
ASHG19A3A007756	80.3152	102.983	6.24859	6.76322	noncoding	NR_033312	BDNFOS	RefSeq_NR	2036	chr11	+	27528398	27719716	ENST00000499568,	AATTTCATTGAGCCATCCTGTTTTACAGCACCCAACAGAATCCCTTCAAAGCCTCGTGGT
ASHG19A3L0002153	2451.59	2683.4	11.168	11.4756	noncoding	BF803219	lincRNA-RIPK2-4	lincRNA	175	chr8	+	90226145	90226296		TCCTAGCTGTGATTTTCTTGCTCCCCCTTGCTATATTTATTCTGGGCACACATTATGGAG
ASHG19A3L0000254	56.1106	66.3536	5.72543	6.13147	noncoding	BF745951	lincRNA-PTPN20A	lincRNA	443	chr10	+	48508705	48509098		GACGATCACATTTATCGTTTAGTTAAAGGCTTCATTTAGCCCCTGTTGGTGGAGGTAGCA
ASHG19A3A009341	64.0867	65.0131	5.92288	6.10292	noncoding	ENST00000429469	RP11-553K8.2	Ensembl	363	chr1	-	198566853	198567998		GATCTCTGAGTGACTACAGTGAACAAAGAAAGAAAGACTCCTGCCAAACCTTGTGGACAG
ASHG19A3A049262	6317.25	6679.92	12.5389	12.7843	noncoding	NR_003272	PSPC1	RefSeq_NR	1716	chr13	-	20248895	20357083		GCTTGCAGTGTAATTCAGAAGAGTTAAGACCAGAAGTACTGGAATCATACTTCCTTTCAG
ASHG19A3A047438	8185.57	6209.9	12.9259	12.6784	noncoding	ENST00000463466	RP11-874G11.1	Ensembl	464	chr12	-	28717610	28718074		TACACTTTGCCAAGAAGCACAAGAAAGGCCTAAAGAAGATGCAGGCTAACAATGCCAAGG
ASHG19A3A047500	2958	1263.11	11.4379	10.3914	noncoding	NR_028408	LOC400027	RefSeq_NR	2202	chr12	-	46119502	46121704		CCTGACAAAGTAATGTTAGAGATGTGCTGACAGCTTTACAATAGATATTCTCCAACTAAT
ASHG19A3A031378	341.403	404.512	8.32508	8.75356	noncoding	ENST00000411804	RP1-91G5.3	Ensembl	707	chr1	+	152346429	152417932		CGGCACTTTATTTCCTTCCCGTTCTGCCCCTTTATATAAATAAAGAAAAGTATGAAAGAT
ASHG19A3L0000256	8492.95	1676.02	12.9789	10.7963	noncoding	DQ269985	lincRNA-AKR1C3-2	lincRNA	972	chr10	+	5005636	5149693		CAGCCTTGGAAAGGTCACTGAAAAAAGCTCAATTGGACTATGTTGACCTCTATCTTATTC
ASHG19A3A049905	243.562	257.655	7.84304	8.0928	noncoding	AF090886		NRED	2337	chr13	+	20260858	20262963		GCAGCACCAAAATACCTATCATTTGGTTTTTTAAAACCTGTCACCCTTGCCTTCTTTCTT
ASHG19A3A007757	803.69	708.208	9.56418	9.5548	noncoding	NR_033313	BDNFOS	RefSeq_NR	1279	chr11	+	27528398	27719716	uc009yjb.2,	ATAATTTCATTGAGCCATCCTGTTTTACAGGATTTTCCCTCCTGGTGAGTCAAAATGAAC
ASHG19A3L0000760	1758.85	2460.87	10.698	11.3523	noncoding	BG896515	lincRNA-MAP3K9-2	lincRNA	419	chr14	+	71150688	71151023		AAGTAACTGAAATTGTGCAATCATGGAGAGACATAGTCCATTCCCTCACTCCCCCAACCT
ASHG19A3L0001014	238.151	141.329	7.80969	7.22329	noncoding	BC035266	lincRNA-BRD4	lincRNA	3255	chr19	-	15363805	15443342		GGGCCTGTCCCATCCCTGGGATTTTATTCTAACTAGAAATAAATGCTAACCCTCAAAAAA
ASHG19A3L0003048	312.144	315.111	8.19904	8.39142	noncoding	AW274645	lincRNA-PPP2R5C-1	lincRNA	367	chr14	-	102415403	102416162		AGGAGACCCTGACTGAAAAGCCAAGGCCCCGGCCTCCAAGGTCACCAATACCTTGGGCAG
ASHG19A3L0001977	152.502	72.2054	7.17107	6.2531	noncoding	CD357052	lincRNA-MED30-2	lincRNA	743	chr8	-	118758199	118758929		TGATAAACCGGGCCACAAACCCCTTTTATCACTTTTATTATGTAGGTCCAACCTTAGCCT
ASHG19A3L0003526	223.933	331.11	7.72313	8.46124	noncoding	CR745936	lincRNA-BANF2-1	lincRNA	532	chr20	-	17806254	17807629		ATCACTCGTGTTTTGTGCCTCTGCTTCTACCACTTCATAGCACTGTGGTGTTTAATCTCG
ASHG19A3L0003462	1324.22	1206.45	10.2826	10.3235	noncoding	BF795336	lincRNA-FNBP1	lincRNA	864	chr9	-	132814128	132816095		GGTTTAAGCCTTACTCTTCTTAGGTCCAGTCACTTAATTTCCATACCTCCCCTTTGTTCG
ASHG19A3A036116	149.766	142.186	7.14536	7.232	noncoding	uc003yrb.2	CR933665	UCSC_knowngene	5639	chr8	-	125474739	125486804		GATAGCGACTGAAGGGCAAGAACCTAGGGTTTCCTGTCTTTGATATTTCTCATCTTTGAG
ASHG19A3A049566	382.574	301.742	8.49083	8.32844	noncoding	NR_002612	DLEU2	RefSeq_NR	2768	chr13	-	50556687	50699677	uc001vdo.1,	CTGGTGGGCTTTTTGTCCTTCCAGATGTTTTTCTACCTTCTGCCTTTTCCAATAAAGCTT
ASHG19A3A018464	134496	136542	17.0658	17.0319	noncoding	ENST00000432629	RPL12P4	Ensembl	497	chr20	+	53691182	53691679	NM_000976,ENST00000495231,ENST00000477007,ENST00000424633,ENST00000406939,ENST00000374520,	AAACACAGTGGGAATATCACTTTTGATGAGATCGTCAACATTGCTCGACAGATGCGGCAC
ASHG19A3A049850	639.383	756.959	9.22504	9.6538	noncoding	ENST00000413637	RP11-315H15.1	Ensembl	657	chr13	-	112976880	112985539		GAAGGTTTTCTAACCTTCTATCAGATTTTCTAACCTCCCCAAGCCACAGGATGAGAAAAG
ASHG19A3A042228	24058.5	26907.7	14.4776	14.7749	noncoding	ENST00000450208	RP11-193H5.2	Ensembl	775	chr1	+	238090130	238090905	NR_027247,	TCCCTGGAGAAGAGCTAGAGCTGCCCAATGGCCAGGTCATCACCATCGGCAATAAGCCAT
ASHG19A3L0003460	251.348	199.166	7.89142	7.72161	noncoding	CR743903	lincRNA-WDR5-1	lincRNA	508	chr9	-	137031026	137031533		TCCTGGGTGATGTGCAGACCTCCGACCTCCACCCAAAGTAAAGACAGGCTGCTATGATGG
ASHG19A3L0002064	89.2065	91.5807	6.40303	6.58774	noncoding	CN294846	lincRNA-STC1-2	lincRNA	252	chr8	+	23564653	23647000		AGAGTCCTGATGATTAACTGCCGTCAGTGGAACTGCCTGTTTTTCCTCAAGTGGATCTTT
ASHG19A3A040460	80.8933	154.332	6.25897	7.35392	noncoding	ENST00000439143	RP11-308D16.1	Ensembl	386	chrX	-	136029906	136030292		CATAGTTGCTAACAGCAGAGAGTCAGGAATTACATTACTCCCAAATTAACCAGGATGCAG
ASHG19A3L0002413	100.379	98.0538	6.58027	6.68793	noncoding	CV370110	lincRNA-CDH17	lincRNA	511	chr8	+	94993581	94994091		TCTCTAGTTATGGCCCCTTCAAATTCTCTGCTTCAATCATATTTGAAGCTCTTTGACTTA
ASHG19A3L0002385	430.891	363.285	8.65857	8.6006	noncoding	chr1:186587114-186596603+	lincRNA-PTGS2-3	lincRNA	9490	chr1	+	186587114	186596603		CTGCATAATGAACACTTTTCAATGAATTAATGGACTCCCCTGATTATGTATTTCAGACTG
ASHG19A3L0003472	249.383	241.54	7.87935	7.99832	noncoding	chr2:168476665-168483470-	lincRNA-XIRP2-2	lincRNA	6806	chr2	-	168476665	168483470		TCTATGGACATCCCAAGTTTTCCCTACCTGCAGTCTCTCACACACTTTTGTACATTTTTA
ASHG19A3A026748	1237.51	1187.38	10.1883	10.3003	noncoding	uc003jnb.1	AK056817	UCSC_knowngene	2757	chr5	-	42985502	42993435		ATATTTCAATAAAAATCTGCACTTTGTGAGTTGAGCCCCCTCAAAGAGACCTACAGACCC
ASHG19A3L0001574	235.033	273.498	7.79126	8.18212	noncoding	exon3074-	lincRNA-ZNF608-1	lincRNA	241	chr5	-	124745554	124745794		ATGGCCGTTTTAAGATGATTCCGCTTTCTTTTTCCCTTGGCCTGGTTAAGCAACTCTACC
ASHG19A3A018454	136.002	139.571	7.00499	7.20707	noncoding	ENST00000454600	RP4-723E3.1	Ensembl	745	chr20	+	50827183	51263280		AAGAGACACGAAGTGATAAACCGAGCACCCTCTTTGAAGATTTCCCAGTATATTTGTCCC
ASHG19A3A026815	923.901	1089.99	9.76242	10.1765	noncoding	ENST00000502919	CTC-236F12.2	Ensembl	473	chr5	-	55750098	55750571		ACATGCGCTGGATTGACCTAAACTGCAACATGGCCCTTGTAATTATACCGTGCTTTTGCT
ASHG19A3L0002666	109.521	214.351	6.70196	7.82942	noncoding	DB462076	lincRNA-NMBR-4	lincRNA	481	chr6	-	142399786	142468245	NM_002511,	GATGAATTACATCCAAAGATTCATTCAGTGCTCATTTTCTTGGTCTATTTCCTCATACCA
ASHG19A3L0003349	754.186	796.293	9.4687	9.72502	noncoding	AW631458	lincRNA-ZFP36L2-1	lincRNA	414	chr2	+	43306949	43310757		AATGCACCCTAATACATTTTCCTGGATCTCACCTGTGAATTTCCCCTGCCCGAAAATATT
ASHG19A3A051746	12532.3	3213.58	13.5388	11.7247	noncoding	NR_023938	C14orf132	RefSeq_NR	7504	chr14	+	96505661	96560133		GACTTCTCTACAGTGAAGACTCTTTCTTAATAAAGGATTTCGCTGTGCTCTTTTGATTAA
ASHG19A3L0002082	210.597	173.616	7.63648	7.52343	noncoding	chr8:38509143-38523468+	lincRNA-TACC1	lincRNA	14326	chr8	+	38509143	38523468		AACGTAGATTAAAGACAAGTTAAAAAGTCTGAATCTGCTTCCTGTGGTCTGTGCACAGCC
ASHG19A3A012632	4671.95	3036.5	12.1161	11.6469	noncoding	NR_024279	FLJ37453	RefSeq_NR	2732	chr1	-	16160709	16174642		CGGGTTTATAGCCCATTATTTATATCGGAGCCATAAACTTGAACAATAGATTGGAATATC
ASHG19A3A020282	292.625	260.131	8.10879	8.10637	noncoding	ENST00000417957	RP11-375H17.1	Ensembl	451	chr22	+	28112467	28117665		CATACTGTCTCGATTTCTATCTCTTCCTAAATGCCTTTTCCCAGCTTGATACATTAAAAA
ASHG19A3A000427	150.61	111.449	7.15351	6.87862	noncoding	ENST00000501280	AC008625.2	Ensembl	2751	chr5	-	153813348	153825382		cttcagcctcccgagtagctgggattacagacctgggaaagcttcctccagccctgatgc
ASHG19A3L0000746	1275.04	480.505	10.2291	9.00494	noncoding	AK296158	lincRNA-TMEM30B-1	lincRNA	1756	chr14	+	61654286	62016579	NM_006255,	AAACTTTTCCTATGTGTCTCCAGAATTGCAACCATAGCCTTATGGGGAGTGAGAGAGAGG
ASHG19A3L0001400	1317.74	1455.09	10.2752	10.5945	noncoding	DB296184	lincRNA-GRM7-1	lincRNA	545	chr3	+	5732744	5733284		CAGGCTAAAACCTTTTGGACAGGAATTTATTATTATTATCCTACAATTTCCCCCCTTTTC
ASHG19A3A012475	1384.85	1093.01	10.3479	10.1793	noncoding	uc002nrr.1	AK092080	UCSC_knowngene	1970	chr19	+	24216246	24249490		AATCCTGTACCCATGTTATGACTCTCCCAAATGTGCCTTACCTGTTGTGGCACAATATAT
ASHG19A3L0001256	666.671	558.207	9.28835	9.22086	noncoding	exon2438-	lincRNA-CEBPB-1	lincRNA	339	chr20	-	49049512	49049850		TGTCTTTCTATGATTCATTCATTCATTTTCCCTCTCATCACTTAAACATTGAATGACTTC
ASHG19A3A011353	6250.09	7578.39	12.5248	12.9614	noncoding	ENST00000448432	RP11-453O22.1	Ensembl	357	chr1	-	221307206	221307563		TTCTGGGGGTAACATTACCCATAACACAGACAAGAACCTTACTATCCCCACCAATATTGG
ASHG19A3L0000091	109.276	87.6039	6.69886	6.52368	noncoding	chr1:229871502-229899827+	lincRNA-GALNT2	lincRNA	28326	chr1	+	229871502	229899827		CGTTGACACAGAACTTCCATCAGCCTCTGTTGCTGGGTTACTTCCAACAACATGACCTAT
ASHG19A3L0000105	416.547	494.55	8.60605	9.04886	noncoding	chr1:235153477-235164377+	lincRNA-TOMM20-4	lincRNA	10901	chr1	+	235153477	235164377		TCCTGCAGGAGTGTTAGCATCTCCACACAAGCCTTGACAGCCCTGCTCTTCTCCTCGATG
ASHG19A3L0000325	224.748	107.529	7.72672	6.82828	noncoding	AK302893	lincRNA-MICAL2-1	lincRNA	3585	chr11	+	12115542	12284466		CCTTGATCATGAAACAATACCATGAGGGGGCCTCTGTCACCTTTGAAAAGAACACTTTTT
ASHG19A3A049079	891.025	1590.82	9.71021	10.7208	noncoding	NR_027345	NCRNA00173	RefSeq_NR	1597	chr12	+	116971226	116973326		TTATGTCCTGTGTAGCAGCAGGTAGTGTGGCTTTGAGAAAATAAAATGGCCACCTTGCTC
ASHG19A3L0001136	80.6634	133.784	6.25462	7.14513	noncoding	chr2:19979944-19990294+	lincRNA-TTC32-1	lincRNA	10351	chr2	+	19979944	19990294		ATAAAAACCAATGCTACCACAGACCCATTAATTGTAGCTCCTTCTAAGCCCAATCAGCTG
ASHG19A3L0001306	251.588	353.641	7.89252	8.55712	noncoding	exon2751-	lincRNA-PLXNA1-4	lincRNA	101	chr3	-	126878038	126878138		CCTCCCAGTAATTGTTGCATGGGGTGTGTGCCTTCTACGTGCCTGGCTTTCTTCCTATGT
ASHG19A3L0000644	159.642	222.711	7.2382	7.88199	noncoding	exon1336-	lincRNA-OLFM4-5	lincRNA	358	chr13	-	55160971	55161328		CTGTCTCCCTGAAAGAATGTGTCCCTTCTTGTGACAGGAAAGAATTTCCATATACCTTAT
ASHG19A3L0002967	194.137	234.038	7.51706	7.95372	noncoding	AU185412	lincRNA-LIG3	lincRNA	629	chr17	+	33306242	33306872		TAACTAGCTGAATCATCTCCCACATGGGTCACTATGAGAAGCCTTCTGATTTGGTCCCTT
ASHG19A3A039539	979.386	1304.73	9.84842	10.434	noncoding	NR_026761	C1orf97	RefSeq_NR	797	chr1	+	211556096	211605876		ACATGGATAAGAAGTCCACTCACAGAAATCCTGAAGATGCCAGGGCTGGCAAATATGAAG
ASHG19A3L0002942	299.155	328.26	8.13917	8.44842	noncoding	BX115115	lincRNA-ACTR2	lincRNA	649	chr2	-	65501495	65502138		CAAGGTCCTTTAAATTGTCACCATAGTTTAGGTTCCACTCCTTCCTAATAGCTCTTAAAT
ASHG19A3A014897	21329.3	26643.4	14.3024	14.7611	noncoding	ENST00000396848	AC010138.3	Ensembl	867	chr2	-	204637353	204638225	ENST00000428039,ENST00000399556,	ATCCTTCAAAAAACAAGAAAAAACTCCCAAAACACCAAAAGGACCTAGTTCTGTAGAAGA
ASHG19A3L0002070	22888.4	16778.1	14.3998	14.1046	noncoding	AK130123	lincRNA-PPP2R2A	lincRNA	1823	chr8	+	25230155	26228377	NM_002717,NM_001177591,	GATTTAATTGTGTATCCTCATTACTGTATCATTTGTGGGGTACACCCCTTCCCCCTTTTT
ASHG19A3A020789	4254.18	4587.89	11.9776	12.2428	noncoding	ENST00000417487	AC104297.2	Ensembl	715	chr3	-	17918946	17919661		AGCAATTAAGATGGACCTGGAGGAAAACCCTAAGAAGCCGATTGAACACATGTTGCTGTC
ASHG19A3L0000081	228.9	191.364	7.75318	7.6622	noncoding	AW572416	lincRNA-WNT4	lincRNA	350	chr1	-	22585663	22585982		TTGTTGCCTTCTCTAGAGCCTTCCAGAATTATCCAAGAACCACACAAAGCCTTTGTGGGT
ASHG19A3A029663	683.469	655.199	9.32632	9.44615	noncoding	uc003npw.2	HCG18	UCSC_knowngene	6026	chr6	-	30255173	30294150		TTCAAATACTCTTTGTCCTGCCCCTGCTTGGCGAAATTTACCGAAATTATCTACCTATCC
ASHG19A3A032627	1350.96	778.995	10.3124	9.69591	noncoding	uc003tbd.2	BC041636	UCSC_knowngene	1130	chr7	-	30555927	30601744	ENST00000434399,	TCCTAAACTGTAGCTTGCAATGTGCCTGTTTCCAGAAACCAAGGTGAAAGTGCTTTTAGA
ASHG19A3A037786	3661.8	2558.38	11.7655	11.4143	noncoding	ENST00000446783	RP11-40H20.1	Ensembl	640	chr1	-	27527324	27527964	NM_017812,	AAAGTTCAAGCGGTATGAGTCTCATCCAGTCTGTGCTGATCTGCAGGCCAAAATTCTTCA
ASHG19A3L0002078	78.6771	86.7158	6.21888	6.51012	noncoding	CB051377	lincRNA-ZNF703-3	lincRNA	599	chr8	+	37264145	37278906		ATGACCCAGAAACTCTGGTCTTACTCAGTCTCATAACATTTTTCCAGCCTGATTCCCTGA
ASHG19A3L0000721	407.445	415.526	8.57708	8.79337	noncoding	AF338234	lincRNA-FBXO33-2	lincRNA	4110	chr14	+	39736449	39857717		GTCCTTACCTGATTTCCCTCTGAAAAATGTTTTCCAGAGATGTAGTGATATTGTGATATT
ASHG19A3A007112	40029.2	36540.1	15.2372	15.207	noncoding	NR_003038	SNHG5	RefSeq_NR	524	chr6	-	86386725	86388451	ENST00000414002,	TGGTTAAAACCTGACACTTTTAACAGTGAACAGCGTTCTGAGTGTGGACGAGTAGCCAGT
ASHG19A3L0001302	501.496	477.717	8.87334	8.99596	noncoding	CT001622	lincRNA-IFT57	lincRNA	865	chr3	+	107843910	107855944		TGGGTCCTGGCTGGGTCTTTCGTTCTTGCTTCTCTGCTTCAAGAGGCTAATAAGTCCTGG
ASHG19A3A023744	189.263	186.048	7.47968	7.62294	noncoding	ENST00000427064	AC090505.1	Ensembl	464	chr3	+	194548618	194553321		AAGATGCCAATTAGGAGAAAATAAAGACAGGGACTCCTCCATCCCAGGAAGAAGGCAGTA
ASHG19A3L0000382	97.9257	89.8258	6.54285	6.55928	noncoding	DW455445	lincRNA-C11orf74-2	lincRNA	174	chr11	-	40033593	40033750		TTACTGACACTTTGCTGGGCTGGTGCTGCTACCTTAAGTGTCATATATGATTCAATCCCT
ASHG19A3L0002640	504.765	611.06	8.88249	9.34481	noncoding	chr10:130341500-130364281+	lincRNA-MGMT-2	lincRNA	22782	chr10	+	130341500	130364281		TTATCTACACCATAAAATGCCACAAAAGTAATACTGCTGCCTCCCCAGTGAGCCATCTGG
ASHG19A3A013284	579.422	325.129	9.08119	8.4356	noncoding	AK091805		misc_RNA	2929	chr2	-	10702420	10706491		GAGCAACTGAATTCTATTCAAAACTTTGGAAGGAAACAGCAAAGTGTTAGAATACGTGAT
ASHG19A3A027709	210.044	209.279	7.63269	7.79464	noncoding	BC015716		misc_RNA	1903	chr1	+	110438594	110440481		GAGCTATAGGCCTCTGGGCAAATCCAGCTCCCTGCTTGTTTTTATAAATACATTTTATTG
ASHG19A3A025232	350.745	190.252	8.36214	7.65369	noncoding	NR_015433	LOC93622	RefSeq_NR	1688	chr4	+	6675820	6677774	ENST00000307533,	GAGGGGAGCGCAGAGCCGTGCCACGCTCTCCGCGGAGTTGGTTTCATTCTTTTTTCATAG
ASHG19A3A055122	408.457	390.212	8.58064	8.70036	noncoding	uc002aug.2	BC034424	UCSC_knowngene	3146	chr15	+	72571207	72644133		ATTGTTTGAGCCCCTGAGATGAGCCTTGCCTGAGGGGTTCCCCAGCCCTGGATCTGGCCT
ASHG19A3A042493	338.103	299.363	8.31233	8.31568	noncoding	uc001iot.1	BC078172	UCSC_knowngene	917	chr10	-	17257194	17271983		TTCAGCTCCTGCAGCTCCACCTTCTCGTTGGTGCGGGTGTTCTTGAACTCGGTGTTGATG
ASHG19A3L0003056	138.229	119.601	7.02712	6.98428	noncoding	chr7:41044125-41053899-	lincRNA-C7orf10-3	lincRNA	9775	chr7	-	41044125	41053899		AACCTGGTGGTATTTGTGATTGTGCCCATGATGTCCCATTGCAGATGTCTGCATATGATG
ASHG19A3L0001522	111.109	75.2543	6.72209	6.31196	noncoding	chr4:71997061-72013886+	lincRNA-SLC4A4	lincRNA	16826	chr4	+	71997061	72013886		CTTGCCCTCCAAAGTTCAGGTAAGTGACTAGATTCACAAACTTATTTCAGAATGCCAGGA
ASHG19A3A039974	530.969	273.14	8.95706	8.17913	noncoding	ENST00000440184	RP13-34C21.1	Ensembl	427	chrX	-	62519125	62519552		ATTGGAGCTACAGACTCCAGTGGAGAGGTCATGTTCCTGATGAAATGGAAAAACTCATGA
ASHG19A3A025971	366.202	314.988	8.42664	8.39047	noncoding	uc003ide.3	CR610292	UCSC_knowngene	980	chr4	+	120409797	120473178		TGAACAGAGTAACAGGACTATATTTCTGAAAAAGGATGAACTTACTGGAAACAGGATTGC
ASHG19A3L0001917	105.684	130.184	6.65125	7.10822	noncoding	DB251409	lincRNA-STARD3NL-2	lincRNA	551	chr7	+	37960700	38166514		TCTCCATTTCACCTCCATTCAATGCAACTGTTGGCAGCATAGAAATTATCTTCAAGTGCA
ASHG19A3L0000404	3002.03	3165.91	11.4638	11.7015	noncoding	AI252667	lincRNA-WNT11	lincRNA	438	chr11	-	76001616	76002054		ATGTTCTTGTGCCCTTCCTGCCCTGGGTTGGGACTCCTCAGTTCCACCTGTGCTGTTCAC
ASHG19A3L0000951	1128.73	1110.95	10.0557	10.2059	noncoding	BM466146	lincRNA-ZNF396	lincRNA	793	chr18	-	33026128	33026905		GGGCATCCATCCTCTTCCTTCTTGGCCCAGTGAAGACTATCCGTGGACCCCCATTTACAA
ASHG19A3L0001311	3045.55	1347.32	11.4881	10.4807	noncoding	DA444159	lincRNA-SLCO2A1	lincRNA	593	chr3	-	133847907	133877108	NM_001005861,	TACAGTGCCTAACAGAGTTTCATGCAGCCCTGGGGGCCTACGTCTGACTCCTCTCCAATC
ASHG19A3L0000373	20780.9	16620.3	14.2604	14.0846	noncoding	EC464921	lincRNA-LRRC4C-5	lincRNA	89	chr11	+	37649926	37649992		GTACTGATAGAAATCTCTAGTGATAATCATAACACTCTCGGTCACATTCGTTTTTCCTTC
ASHG19A3A040155	1165.58	720.104	10.1048	9.5794	noncoding	ENST00000419829	RP11-465C5.1	Ensembl	959	chrX	-	93891664	93894569		TATAGATAGTCCAGGACAAGTCCTCCTACAGTCCAAGGACCAGATTATAGCTGGAAATGC
ASHG19A3A044162	134.617	110.796	6.98938	6.8698	noncoding	uc001jzw.1	AK126491	UCSC_knowngene	3842	chr10	+	80027098	80159502		GGGCTTGACATAGGCTCTCTCATCTCCACACAGTTAATATGGTTTTACGATAAAACAAAG
ASHG19A3L0000481	500.063	414.045	8.86859	8.78798	noncoding	AK297025	lincRNA-FGD4	lincRNA	2924	chr12	+	32638905	32793673	NM_139241,	GACTATTTTCCTATGTTTATGTACTCTTAGTGAAATTAGTGTGCAGAGTCATTCTACCGA
ASHG19A3A044020	455.176	592.636	8.73698	9.30404	noncoding	ENST00000433152	RP11-222A11.1	Ensembl	744	chr10	+	67345445	67441220		GAGAACTACTCAAGAGAACAAAACCACCAGCAATATCCACCTGTATTTGTCTTTTCATAA
ASHG19A3L0002714	94.9408	117.427	6.49652	6.95605	noncoding	chr16:88450663-88475686-	lincRNA-BANP-2	lincRNA	25024	chr16	-	88450663	88475686		ATTTACCTGTTTATTTTGTTTATTTTCAGGAATGCAGGGCTGTGGGCTGTGCTGGGGGCA
ASHG19A3L0001647	126.158	119.473	6.89951	6.98244	noncoding	chr5:3828075-3841525+	lincRNA-ADAMTS16-1	lincRNA	13451	chr5	+	3828075	3841525		GTTTTCTACATTGACCATGCATCTTCCCAGACCATCATGGACTTTATGGGCATTCCATAC
ASHG19A3A028504	101.541	132.868	6.59526	7.1356	noncoding	ENST00000420156	RP4-543J13.1	Ensembl	332	chr1	+	114749048	114804900		AAGGCATACAGGGAAGTCTTACCCCCTGCAAAGTGATGAGCACTAGACATCCTTTTCTGT
ASHG19A3A040862	1653.92	1891.83	10.6037	10.9774	noncoding	ENST00000422221	RP11-469E19.1	Ensembl	752	chrX	+	40936251	40937003	NM_013943,	TGCTCCCCAAACTGCATATTGTCAAGGTGGTGGCCAAAAAATATCACAACTTTGATATTC
ASHG19A3L0000810	314.322	164.393	8.20948	7.44347	noncoding	CR741480	lincRNA-FBN1	lincRNA	552	chr15	-	49021279	49022041		GAGGACTTACCACTTTTCTTCGATTATGAAAAATGCTCAGCCAATAGCTATTCATTAAAC
ASHG19A3A039817	102.387	101.137	6.60623	6.73438	noncoding	ENST00000439330	RP3-393P12.1	Ensembl	1433	chrX	-	47636225	47638096		GGGAAGGCCTTCAAAAAACCACATCTCCTTGCACGTCAGAAAACTCATATTGGAGCAAAA
ASHG19A3A010610	149.403	115.52	7.14142	6.93166	noncoding	ENST00000467028	RP11-19F9.1	Ensembl	488	chr18	+	35252651	35253139		TCTGGAACCATAAAATAGCTTTGGAGTACTGCACAGTTTGTGGGCTGTAATGTTGATGGC
ASHG19A3L0001841	270.878	260.482	7.99956	8.10904	noncoding	CV356047	lincRNA-MMS22L-1	lincRNA	554	chr6	-	98385303	98385860		TCTTTCACTTGGACATATGCCCCTGCTTTCCATTAGCCTAGGACTCTTCGTAGCTCTATA
ASHG19A3A024974	110610	92799.2	16.7698	16.4768	noncoding	ENST00000426688	RP3-445O10.1	Ensembl	643	chr1	+	81674252	81674895	NM_007104,ENST00000486625,ENST00000472730,ENST00000343867,	TTGCTCAAGAAAAACTGGCAGAATGTCCTGGCCTTATATATCAAGAGCACCATGGGCAAG
ASHG19A3L0001347	2733.18	3312.69	11.3295	11.7668	noncoding	chr3:167821006-167840006-	lincRNA-GOLIM4-2	lincRNA	19001	chr3	-	167821006	167840006		TCTATTGAAGCTACACCCAATTTAATCTCCCTTCTCAGCCAAACATATTAACACCAAAGT
ASHG19A3L0001954	173.576	199.238	7.35565	7.72247	noncoding	AA604748	lincRNA-OXR1-1	lincRNA	262	chr8	+	107055703	107055965		GTGTTTTTCAGAGGCCCTCAGCCATGACTCCATCTTTAATAAATTTCTATAACTCTTTTA
ASHG19A3L0003044	411.858	456.462	8.59157	8.92862	noncoding	chr14:93595225-93603463-	lincRNA-ITPK1	lincRNA	8239	chr14	-	93595225	93603463		AGATTTCAAAACTCCAGGGTACTGCCTTGCTCTCTGAGTATTTCCTTCCTTCTTTCCTCT
ASHG19A3L0003315	149.758	145.758	7.14513	7.27019	noncoding	DB455167	lincRNA-C6orf99	lincRNA	480	chr6	+	159290910	159294607		TTGAGGAGGCCTAAAATGAATGAACGCGGCTGTGCCTCCTGAGCAGGCTCACAGTTGTGG
ASHG19A3L0003403	282.917	375.332	8.06051	8.64457	noncoding	AK128058	lincRNA-ZNF532	lincRNA	6183	chr18	+	56529831	56653197	NM_018181,	TGAAACACATTTCATATGTAAATAAACGTGGGACATTTGGCCCTTGTGCTTCTGTGAGAG
ASHG19A3L0000681	96.5942	75.8251	6.52306	6.32438	noncoding	chr13:77221824-77235874-	lincRNA-LMO7-4	lincRNA	14051	chr13	-	77221824	77235874		ACTTGTCATGATGGAACCCCTGAAGAATTTGGGAGCCTTTTCCGTGTCTATACTTGGATT
ASHG19A3L0001397	310.511	360.56	8.19308	8.58865	noncoding	BX644753	lincRNA-SFMBT1	lincRNA	796	chr3	-	53106144	53106931		GCGTCCGAAAGTCCACTGGACCCTAGACCTTAAATGGCCTCCCTGAGCCTTTAGGCTTTT
ASHG19A3L0000728	10618.4	8914.11	13.3024	13.1971	noncoding	BC146281	lincRNA-C14orf104	lincRNA	3292	chr14	-	50033026	50319473		CAAAGTGAAAGTGTCTGCACCCAATCTTCTGAACGTAAAAAGGAAATCAGGCCTCATGGG
ASHG19A3L0000072	435.555	341.903	8.67412	8.50642	noncoding	AI247420	lincRNA-RPS6KC1-1	lincRNA	408	chr1	-	213719730	213967930		AGAATAGGTCCTGCCTCCTCTTGTGGATCAGTTACTTATCCATTCATCCATGGACATGGA
ASHG19A3L0000188	284.362	250.08	8.06745	8.05012	noncoding	chr10:102402035-102412460-	lincRNA-HIF1AN-1	lincRNA	10426	chr10	-	102402035	102412460		TAATTAGCAAATCCACAGGCTCCTCTTGGTATTTCTTCTCTTCGACCTCTGCGGCATTTG
ASHG19A3A011340	62.6192	68.757	5.88889	6.18326	noncoding	uc002nwj.2	BC045806	UCSC_knowngene	2079	chr19	-	35307058	35323773		ACAGAAGTCATGAACAGAAGTATCTTGGGGCACATGTTTCTTCTCTGTTGTGCAGGCTTC
ASHG19A3L0000398	106.047	131.876	6.65646	7.12582	noncoding	CU444927	lincRNA-MYEOV-2	lincRNA	742	chr11	-	69059868	69182303		ACAGAGGCTTTAAATGCTTTAAACCAGGAATCTCCAAACTTCTTTTGCTGTCTTCCATTA
ASHG19A3A039601	388.926	286.811	8.51341	8.25119	noncoding	ENST00000412485	GS1-600G8.5	Ensembl	1497	chrX	-	13284166	13321511		ACTAGTATTGTTAACCATTGCAAAGAAATACTGTTGCCCTCCATTAAAACCTGAACTGCC
ASHG19A3A015144	71.0052	128.212	6.07121	7.08755	noncoding	uc002vvo.1	AF279775	UCSC_knowngene	723	chr2	-	235791851	235797446		GAAAGTGTTGAAAATTGACATCTATGTTTACATATCACAGCAACACAAAGTGCCAGCAAA
ASHG19A3A000081	2724.26	2206.43	11.3254	11.1991	noncoding	ENST00000400430	RP11-350A18.1	Ensembl	702	chr13	-	41025130	41055143		TGGAATCTTCCTCCTCCTCACTTCTCTGCCTTAAGGGCTCTGCCTGCCACAATTCATGAG
ASHG19A3L0000321	61.1534	79.3581	5.85086	6.38803	noncoding	DB519945	lincRNA-DDX6	lincRNA	430	chr11	+	118575315	118620973		TTTTTTGAATAATGAAGAGTCTTTACCCCTGGCATGAGGAGCTGAGGACAACTCCCACTC
ASHG19A3L0003262	730.369	719.526	9.42011	9.57783	noncoding	BU618532	lincRNA-RBFOX1	lincRNA	723	chr16	-	8233784	8234508		CACTTCTGAATTTTATTTTCTATTTTGTAAAATAAAATAGAATCTCCCAGGATGAGTTAC
ASHG19A3L0002456	137.827	139.765	7.02316	7.20869	noncoding	BG494524	lincRNA-TEKT2	lincRNA	772	chr1	+	36535775	36536535		TTTGGCTGTAATGTGTAGCTTTAATGTTCTTTTCAGTTATGGACCCATTAAAAGTATGCC
ASHG19A3L0000860	6413.04	5097.04	12.5639	12.3972	noncoding	AK124977	lincRNA-UNKL-2	lincRNA	2638	chr16	-	1413205	1464704	NM_023076,	CTCAAGTGGATTAATTTCTGGAAGCCTCAATCTGTATGTTTGAGTATTTACATGAGAATG
ASHG19A3L0001123	205.759	134.724	7.60055	7.15507	noncoding	BF108976	lincRNA-MYO1B-4	lincRNA	509	chr2	+	192068946	192069452		CCACCAAGCTCTACAGGAACTCTCTAAAGACAATCCCCTTTTACTTTTCTTTATTATTAT
ASHG19A3A000287	189.655	280.049	7.48217	8.2169	noncoding	ENST00000445080	GS1-124K5.12	Ensembl	2005	chr7	-	66018559	66057351		GGACGCCGGTGGAGACGCAGGCGAGGGCTGCTGTAAAATATTACAGGCATACTTTGGAGA
ASHG19A3L0003441	155.806	143.975	7.20096	7.25054	noncoding	AA668276	lincRNA-TMEM37	lincRNA	293	chr2	+	120184180	120184482		TTTAGGAAAGATACTAGTTCCTCCTTGTTTCACTCATTGCTTCAAGCACAGCCAGCCCAC
ASHG19A3L0000413	411.477	393.527	8.59055	8.71251	noncoding	chr11:8303699-8319049+	lincRNA-STK33	lincRNA	15351	chr11	+	8303699	8319049		GCATTATCACCCCCATCCATTCTTCCTAATCTAAAGAAGAGAAGGCCAAAGTGGACAACA
ASHG19A3L0003266	488.693	589.807	8.83629	9.29639	noncoding	DA673588	lincRNA-LITAF-3	lincRNA	555	chr16	-	11727386	11730233		ATGGAGCTCAGAGCCTGGGTAGCCCCACACAATACCCTCCAGCCACATCTCCTGTAAATA
ASHG19A3L0002183	202.309	233.134	7.57613	7.94831	noncoding	DB471974	lincRNA-SEC61B-2	lincRNA	478	chr9	-	102160898	102582174		AGGTTCCTGTAGGCTTCCAGAGACCACCTGCATTTGTTGGTTGATACCCTCTTCCTCGAA
ASHG19A3L0002233	93.5811	95.7291	6.4737	6.65305	noncoding	AI547046	lincRNA-PRPS1-1	lincRNA	735	chrX	-	106913408	106920220		TCATTACCTGGAGGTCCTGTTTGTGCTCCCACTCAGGCCAAATATGGTTCAAGAAGGCTG
ASHG19A3L0000609	108.618	106.66	6.69071	6.81507	noncoding	CB112975	lincRNA-UBL3-1	lincRNA	379	chr13	+	30229248	30229615		GACACATATGGTGTTCATTGTGGGGTTTTGCTTCTTATTCCCTTTGAGTAAGAATAAAAT
ASHG19A3L0002724	1876.17	1556.1	10.7894	10.6852	noncoding	BF328678	lincRNA-ST14	lincRNA	259	chr11	-	130089127	130089307		TAGTAGCAGGGGTATTTCTACTCATCCGCTTCTACCCCTTAATAGAAACTAACAAACTAG
ASHG19A3L0001833	134.938	190.658	6.99284	7.65667	noncoding	chr6:91127779-91150654-	lincRNA-BACH2	lincRNA	22876	chr6	-	91127779	91150654		CTATAAAATAAGAACTTGAGGTAGGAAAAGCCAAGCAGATGCCCCTGAAACTCTCCTCTG
ASHG19A3L0003290	171.853	218.494	7.341	7.85723	noncoding	DR423683	lincRNA-DLG1	lincRNA	732	chr3	-	197090054	197090786		CCTCGCAGATGCCCGATTTCCTTCTCTACAAGACCAATCTTTCCCAGACTGGTCCTTGGA
ASHG19A3A008625	211.869	157.612	7.64633	7.38409	noncoding	ENST00000456771	RP11-540K16.2	Ensembl	532	chr1	-	181159606	181160285		TCAAGTCACCGTCCACCCTTCAGCTCTGAGCTAGAATCTCAGCAGACACATCTGGGCCAG
ASHG19A3L0000400	739.653	621.494	9.44043	9.36808	noncoding	AA309472	lincRNA-SHANK2	lincRNA	320	chr11	-	71083066	71083386		TACTAGAAAAAGCTGGATCTCCCTCAGGTGAAGCAGCAAACTCAGCGGGGATGGGAAGCT
ASHG19A3L0001066	353.5	380.01	8.37508	8.66188	noncoding	chr2:134708080-134794155+	lincRNA-MGAT5-3	lincRNA	86076	chr2	+	134708080	134794155		GTGAGCATGAACATTACACTCAAATATCATTATATGCTGTGCCCACTCCCATAGGCCCTC
ASHG19A3A025353	145.506	208.322	7.10074	7.78804	noncoding	AK124473		misc_RNA	2210	chr4	+	24661478	24673189		TGGAGGCATAGCAGAGTTACAACTGCTGGCCATGTGGAACTTCTCTTCTCCTATAAGTTT
ASHG19A3A039884	337.682	414.563	8.31079	8.78972	noncoding	ENST00000425150	RP11-348F1.3	Ensembl	451	chrX	-	51099795	51139314		TCCTAGAACCTCAGAGGCATGAAGCTAGAATATCTTCCCCTTCAAGGAGAATAAGCCAAG
ASHG19A3L0002693	94.3123	75.9811	6.48602	6.32718	noncoding	BF058204	lincRNA-NANOS3-2	lincRNA	422	chr19	+	13976416	13976837		TCATGGGCGCTCGGGCCTGCGGAGACCGATCCTGGCGGGGGCCCCGCTCATGCCTGGCCG
ASHG19A3L0000350	16874.2	18711.5	13.9672	14.2742	noncoding	AW470559	lincRNA-LOC100500938-1	lincRNA	507	chr11	-	23186445	23188329		TGTGTGTCTTCCTATCTCCCCTCCTCTAAGGAACGTGCATGTACCAAGTATATGTGAGTA
ASHG19A3L0000498	106.91	113.746	6.66912	6.90842	noncoding	CD300628	lincRNA-CCND2-2	lincRNA	927	chr12	+	4356046	4356743		ACTTTCCTCTGTTGGAGGCAAATGATACCTGTCTCCTTATCTGACATGAAAGTTATGGTT
ASHG19A3A033329	437.05	464.521	8.67878	8.95478	noncoding	ENST00000450686	RP11-325F22.3	Ensembl	538	chr7	-	104590761	104653491		CTCCAGCCAAAGAAAATAATTCAGGTATCAAGTTGGACTAGCTCAGATGACTACAAAATG
ASHG19A3A028047	97.4012	125.443	6.53493	7.05479	noncoding	ENST00000514844	RP11-46C20.1	Ensembl	667	chr5	+	27472413	27494425		GGCAGACCAACTCCTCAGAAAACATTATTCTTTGACATCAATATGTTTTGCACAAAATTG
ASHG19A3A055208	2051.44	1478.91	10.9124	10.6173	noncoding	uc003kzj.2	BC032795	UCSC_knowngene	1045	chr5	+	133842304	133844920	ENST00000515627,	GCTAATGGTGGAATTTCTGGCATGTGGCAGggccaagtgcagtggctcacacctataatc
ASHG19A3L0002683	66.5323	71.7765	5.9776	6.24366	noncoding	chr4:147979327-148023300+	lincRNA-EDNRA-1	lincRNA	43974	chr4	+	147979327	148023300		CAGGACCTAATGGAGTTACAATCAGTTTTTCAGTTCTTTTGTCTCTCTATTCATAGTTCA
ASHG19A3A055256	854.787	535.003	9.64982	9.15787	noncoding	uc004ebo.2	LOC554203	UCSC_knowngene	2212	chrX	+	73164158	73220326		ATTGTTTGTTTGAAATTGCATTGACGACTGGTACTGGCTCCTGTATCACCCAGCTCTGGA
ASHG19A3A009395	128.388	117.959	6.92579	6.96268	noncoding	HIT000395572		H-invDB	354	chr1	-	200443206	200443559		ATTAAGTAGGAGGTTCAGGGCTAAGCTAATAACTCGCCTGCCTTTCTGACTGATCACAGT
ASHG19A3A018665	463.928	494.771	8.76277	9.04964	noncoding	ENST00000432412	AP000998.2	Ensembl	478	chr21	-	19394686	19487222		AATTGTGCAATGCACCTTTATATGTGGATAACATCTGGACCCCTCCATCTACCTGTGCCA
ASHG19A3A044505	200.687	180.273	7.5625	7.57782	noncoding	ENST00000428766	RP11-57H14.3	Ensembl	317	chr10	+	114648491	114665870		GGAAAGATCAGCTCTGCCATTTGAAACACCCAACTGCTACCTTCTCTCAGAAATCAAAAG
ASHG19A3A021104	421.705	405.064	8.62495	8.75584	noncoding	uc001cil.2	CR621467	UCSC_knowngene	1030	chr1	+	43424774	43448990	ENST00000431759,	ATTTCAACAACCCTTAGAAGCTGACTCAGCTGTCTCCTGGCCCTGACTTTTCTAAGATGA
ASHG19A3L0001300	82.3094	99.4696	6.28523	6.71005	noncoding	AW816050	lincRNA-CCDC54-1	lincRNA	147	chr3	+	106275316	106275463		GAGAATAATTAATCATGTGTCTACATTATCCTTACCACATCTTGCTCATGCATAAGTGCG
ASHG19A3A036123	403.345	285.526	8.56452	8.24366	noncoding	uc003yry.2	BX648371	UCSC_knowngene	5325	chr8	-	126953377	126963433		ACAATAATGATGCCATGACTTGGACAAAATGCCCATTGCCTCTGGGTCCTGCTTTCTTCA
ASHG19A3L0001116	90.1316	84.4921	6.41682	6.47588	noncoding	chr2:187731830-187759380-	lincRNA-ZSWIM2-2	lincRNA	27551	chr2	-	187731830	187759380		ACATTCCCTGAACTGCTTACCTTCCTTTGGAATTCTTCTACAGAGACAATCTATCTGGGG
ASHG19A3L0001392	141.853	102.168	7.06394	6.75001	noncoding	AW299747	lincRNA-SUMF1-1	lincRNA	464	chr3	+	4378328	4378792		CAAAACACTCTGGATTTTCTTTGTCCTGGTTTCTCTTTTAGATATTGCTGGCATTTCCTA
ASHG19A3L0001790	72.4395	96.4651	6.09757	6.66421	noncoding	BG254544	lincRNA-SPDEF	lincRNA	1043	chr6	-	34385230	34712190		TGGAGACGATCCTTTGCCATTCGCATAAACTTACCTGCCCAAAAAACCCTTAACAACAAT
ASHG19A3L0001894	307.49	254.996	8.17852	8.07883	noncoding	DA438209	lincRNA-AHR-2	lincRNA	547	chr7	+	17018702	17092594		TCTCAGTTGGCACTCACTGCTGTCATTTATCCTCTCTAATCACCTGAACTCCTAGGTGTT
ASHG19A3A016749	822.426	928.836	9.59573	9.94224	noncoding	ENST00000452381	AC064834.2	Ensembl	850	chr2	+	196397758	196403405		GGCATTTCTATCATTCTAGCACCACTAGCATTATCGCCTCTTCTCCCATTGACATATTTT
ASHG19A3A044557	171.175	211.373	7.33573	7.80969	noncoding	ENST00000436430	RP11-245J24.1	Ensembl	556	chr10	+	120001163	120027222		ATACCTCCGTGTGCATAATGGTTGTACCTGCTCCAGGAAGGCGCTGGATCCTCCCAACTC
ASHG19A3L0000886	191.598	190.926	7.49797	7.65855	noncoding	DB034728	lincRNA-OSGIN1	lincRNA	572	chr16	+	83964953	83966413		AGGTTTGAAGTTGGACAGGCCCACTCCCTGGAGAGACACCTGGTCCCATGCACACACAAA
ASHG19A3L0000945	591.732	680.537	9.1143	9.49794	noncoding	AA745165	lincRNA-C18orf45	lincRNA	231	chr18	+	20861791	20862022		GGTTCCATCTCCCACTTAGAGGAGCCCTTTTCATTAACAGCTCCACTTAACTTCTATTTG
ASHG19A3L0000637	219.231	241.086	7.69424	7.99506	noncoding	chr13:49123374-49135499+	lincRNA-CYSLTR2-2	lincRNA	12126	chr13	+	49123374	49135499		CTATCTGTACTATCTTTCTACAGCTGCAAAATTGTTCTCTCCACTGCACTTGTAGTAATG
ASHG19A3A049839	7200.74	6853.49	12.7365	12.822	noncoding	ENST00000411449	RP11-120J20.1	Ensembl	460	chr13	-	111415020	111415480		GAGAACTGATATGTGTATTGAGCACATGAAGCACTCTAAGAGCCAAGAGAGCTTCCTGAC
ASHG19A3L0002232	167.019	148.562	7.29983	7.29884	noncoding	CN286266	lincRNA-PLP1	lincRNA	674	chrX	+	103002787	103003462		ATACTCTCAAAACCTTTTCTTCTCTCCATGGGGTTATTTTCCCAGCAAGATGGCATATTT
ASHG19A3A029836	7507.63	9763.92	12.7956	13.3254	noncoding	ENST00000499560	Z95152.2	Ensembl	1227	chr6	-	36125845	36164980		CCTTCCCTGCCGCCGCCCTCGCTCCAGGAGAGAGCTTTCGCACCGCCCCCGCCCTGCTCG
ASHG19A3A033331	93.1148	91.7029	6.46672	6.58979	noncoding	NR_024586	LOC100216545	RefSeq_NR	3615	chr7	-	104650988	104654588		AAGAATAAAAGAAGGGTTTCCCCACTAAAATGACACGGCGATTCCGGCTCTTGTTTTGGG
ASHG19A3A017042	317.853	253.405	8.22519	8.06977	noncoding	ENST00000446594	AC012512.1	Ensembl	718	chr2	+	224569337	224570055		TGTCTTCATCTCTGTGACCAACTTCTAGGAGCTGTCAGCCTGTGTCTTCAGATAGATTGA
ASHG19A3L0000671	112.19	243.416	6.73556	8.01024	noncoding	chr13:73819474-73846199+	lincRNA-KLF12-10	lincRNA	26726	chr13	+	73819474	73846199		AAGCCATCCCAAAATATCTCCTTTAGGCTTTAGACAGTCCTAGCTTTCCTATTACTTTGG
ASHG19A3L0000788	1342.84	1541.38	10.303	10.6712	noncoding	D79689	lincRNA-FOXN3	lincRNA	266	chr14	+	89612622	89612888		ATTGTCATTAAAAGCTGGCCAAGAACATCGATCGTCTCCCCAGTGATGATCTCAGAATTT
ASHG19A3A021421	1597.14	1602.34	10.5561	10.7308	noncoding	ENST00000476607	RP11-572M11.2	Ensembl	425	chr3	-	112760236	112760661		GACTTCCCTCTCCCTAAAGTGCCCAAGAAATGTGGGGACTTCATTATTGAGTTTGAAGTG
ASHG19A3A018062	957.725	1450.88	9.81491	10.5909	noncoding	AK098701		misc_RNA	1416	chr1	+	25031405	25034237		TGTTCAGTTTTAAGTTGTCTGTACACAGCTGCATTGCAATGCAACTCCCCCATCCACCAT
ASHG19A3A053218	74.6663	74.5532	6.14349	6.29865	noncoding	uc002bnt.2	LOC254559	UCSC_knowngene	4778	chr15	+	89904809	89941718	CR612213,	TGGATATCCCCAGCCTAACCAACACCTGTGCTGGGGGGAAAGATAAGACGCCCCCTTTCA
ASHG19A3A024076	112.487	94.5151	6.74013	6.63565	noncoding	ENST00000504219	RP11-617D20.1	Ensembl	627	chr4	-	38621310	38626196		TTGCATGTCTTGTTTTGTTGTTGTACCAGCTTTGTGGATCAGCCAACATCCTTGGCTTGC
ASHG19A3A033579	507.341	362.12	8.88936	8.59574	noncoding	ENST00000480063	AC083874.3	Ensembl	232	chr7	-	134419648	134419880		TTCACTGAGGCCAAGTGCAATATGAATGACCTGGTGTTTGCCTACCAACAGTACCATGAT
ASHG19A3L0000416	123.031	187.264	6.86501	7.63072	noncoding	chr11:87230202-87240977-	lincRNA-TMEM135	lincRNA	10776	chr11	-	87230202	87240977		TTCTAAGATATCATTTTATTCAGATAAAGCCTCAATGCCTTGTTCCCACACCTTCAAGAT
ASHG19A3L0003433	147.508	122.043	7.12153	7.01401	noncoding	chr9:81993205-81999034+	lincRNA-TLE4-1	lincRNA	5830	chr9	+	81993205	81999034		ACTAAGAAGTACAACTCTTTGCCTTTGTCTTCTCCAGGATTCACAGTGACGAATCCACTA
ASHG19A3L0003369	118.038	104.968	6.80562	6.7905	noncoding	AK299698	lincRNA-IMPACT-2	lincRNA	1470	chr18	+	21977239	21981171		ATTTTGCTGGTTCCCCACACAAAAAGTTTGGAAGAGACCCTTATGTCTTCTGTAGAGTTT
ASHG19A3L0002111	149	152.037	7.13781	7.33235	noncoding	chr8:65998046-66008971-	lincRNA-CYP7B1-2	lincRNA	10926	chr8	-	65998046	66008971		CAAATTACTTTGACAACGACTGCTGACATCTCCTGGGCAACATATATGGTATATGGCCCC
ASHG19A3L0001904	114.832	125.828	6.76673	7.05935	noncoding	CB157495	lincRNA-NPVF-2	lincRNA	608	chr7	-	25988420	25989023		AATGGAGGAAGGCTCAATGAGGGAGAAAGTATTCAGCTGCTTGATGTTAGAGCTTAATGG
ASHG19A3L0002005	135.203	129.393	6.99577	7.09975	noncoding	AA528614	lincRNA-MYC-10	lincRNA	307	chr8	-	129306991	129307146		TCTTTCTTTTAGGACTTCACTTATAGCAAGCTCTTTCTTCCCAGACTTTGATAGTCGACG
ASHG19A3A007758	317.577	361.7	8.22354	8.59326	noncoding	NR_033315	BDNFOS	RefSeq_NR	1437	chr11	+	27528398	27719716		GTTCCCACTGCAAACTACGGATGGGGATTTTCCCTCCTGGTGAGTCAAAATGAACAAGAA
ASHG19A3L0001955	157.745	118.343	7.22074	6.96849	noncoding	chr8:107172449-107186724-	lincRNA-ZFPM2-4	lincRNA	14276	chr8	-	107172449	107186724		ACTGCTGCTTTCCTAGCCAACTCTACCTTTGCTACTCAAAATATTAAAGACAGTTTAAAC
ASHG19A3L0000870	364.993	387.709	8.42202	8.69176	noncoding	BU164084	lincRNA-CDH5-1	lincRNA	921	chr16	+	65266701	65405088		AAAGTAACTTTGGGTCTGGCCCTTGATGAAGCTCCCTGATTTTTCCTGCTTGGTGATAAC
ASHG19A3A032579	7825.39	4913.15	12.8572	12.3424	noncoding	ENST00000417997	AC073472.2	Ensembl	600	chr7	-	27022386	27022986		ATGTTCCTGACTATAAGTCGAAAGGAAAGTTTGATGGCGCAGAGGGTCCTGCTAATGTTG
ASHG19A3L0001458	1573.77	12505.6	10.534	13.6802	noncoding	AK021484	lincRNA-SYNPO2	lincRNA	3422	chr4	+	119672345	119956974	NM_001128933,	TGAGAATTATCACATAGCCTAAATTCTAGCCTGGCAGCAAGAGTCACATCTGAGATGTCC
ASHG19A3A031764	376.395	372.2	8.46537	8.633	noncoding	ENST00000452402	RP11-250B2.3	Ensembl	682	chr6	+	81153060	81175644		AAGCTTTCACTGGGAGATTATGAAGGGTAGATGCTTTGTGTCTCCATTGCCTCCTGTGAT
ASHG19A3A030851	133.838	131.922	6.98244	7.12633	noncoding	ENST00000433388	RP1-137D17.1	Ensembl	588	chr6	-	169770092	169788480		AAGCACTTTTGCATCTCTTTCCTGCCCAGAAGCGACCAGAGAGGCCAGGCATTGTCACCT
ASHG19A3A007141	507.175	545.641	8.8884	9.18835	noncoding	NR_003500	RP9P	RefSeq_NR	1405	chr7	-	32956427	32982782		tttgagaggccgcggtggacagatcacgagTTATGAAAAACCTCCTCCTGGGCTTATCAA
ASHG19A3L0002512	261.728	279.698	7.9488	8.21478	noncoding	DB130948	lincRNA-BARHL2-1	lincRNA	346	chr1	+	90504032	90504378		TGTAACACAGCTTATTAGCCTTGGGATTTAACGAACCTTCCTTACCTGCTGTTCCCCACT
ASHG19A3L0000208	683.395	651.892	9.3261	9.43918	noncoding	BX101441	lincRNA-C10orf46-1	lincRNA	712	chr10	+	120374728	120375440		GCAGAGACTCAAAGATTGGCTTCTAATATTCTTCCTATCCTCCCTTAAGAGCCCAGCTGA
ASHG19A3L0003429	502.911	522.249	8.87696	9.12367	noncoding	BQ185896	lincRNA-NPAS4	lincRNA	555	chr11	+	66177770	66184608		CTTTTTCCGGAAAAAATAATAAAGAAAGGAATCAGCCAATCCCTCCTCGATGCCAAAAAA
ASHG19A3A043922	144.116	92.3121	7.08562	6.59921	noncoding	ENST00000427240	RP11-69E11.5	Ensembl	813	chr1	-	39997509	40024379		GGACAATTTCTGTCAATTTGGCCAAACCAATGAGAGTTAAGGAAGGCTTTTCCAGACCAG
ASHG19A3L0000442	761.466	952.596	9.48488	9.9796	noncoding	AW179216	lincRNA-SCARB1	lincRNA	597	chr12	+	125107936	125108533		CCTGGCAACCGTGGCTCCACCTCCAGCCAGGCGTTATCACTGGGCTCCCCGTCTTCCTCT
ASHG19A3L0002409	88.9762	78.4104	6.3984	6.37175	noncoding	CB053878	lincRNA-CHD7-2	lincRNA	473	chr8	+	61565060	61566120		TTTTGCGTCTGCACTTCAGGCCGCCTGGTTGTCGCTGCTGCAGCTCTCATACCTCGGTGC
ASHG19A3A044581	116.748	133.632	6.79056	7.14326	noncoding	ENST00000447943	RP11-78A18.2	Ensembl	299	chr10	+	123495817	123499245		GACTTGAACTTAGTCTGGTTTGCCTTCCAAGTCCAGATTCTCCAAAACATTTTTTCTTTT
ASHG19A3A035896	72717.6	75993.4	16.1353	16.2162	noncoding	ENST00000478813	RP11-941H19.1	Ensembl	628	chr8	-	81177762	81178390		TGAGAAGAACGTGGAGAAGAAAACTGACAAATACACAGAGGTCCTCAAGACCCACAGACT
ASHG19A3A050932	125.861	149.42	6.8963	7.30867	noncoding	AK097298		misc_RNA	2131	chr14	-	71607841	71609970		CTTTCCAGGGATAAAATAAGAGGGGGAAACAAAGAAGTAATCATTCCCCAGCCCCCAGTA
ASHG19A3A053957	96.7648	120.148	6.52625	6.99198	noncoding	BX648197		misc_RNA	5122	chr16	-	75620136	75625237		TTCTTCAGCTTACCCAGTGCCACTGTGAATGTCCTTCTTTACTAACATGTCAGTAACTGC
ASHG19A3A040377	383.117	325.912	8.49283	8.4397	noncoding	ENST00000458202	RP11-41L14.1	Ensembl	1648	chrX	-	128175512	128177160		TATGAGTTCTCCGATCTGTCCTGTGAGCTACACGACATGGTTCAGAAACATCTGCATAGT
ASHG19A3L0001108	148.002	90.7961	7.12682	6.57414	noncoding	chr2:174248004-174261129+	lincRNA-SP3-2	lincRNA	13126	chr2	+	174248004	174261129		ATCAGTGTTTCTTCCTACTCTGTGGATACTGGCCTCTACTATTACATTCTTTTCATGACC
ASHG19A3A000108	78.9225	74.65	6.22379	6.30058	noncoding	ENST00000414721	AP001496.2	Ensembl	607	chr18	-	5232874	5238525		CCGGCGAACGCTCCCGGGCCAGCAGCGCCATCTTCTTGGAAACTTCTGCACCATGAGAGC
ASHG19A3A014144	67.6801	70.8221	6.00132	6.22465	noncoding	uc002tdf.2	BC038566	UCSC_knowngene	1415	chr2	-	106209554	106227016		TGAAAAATCTTGGGAAGAGTGATAGCGATGGTGTTTCCTCTCCAGGGATGACACCCTAAA
ASHG19A3A036031	205.478	194.481	7.59909	7.68544	noncoding	ENST00000499522	AC025370.1	Ensembl	1753	chr8	-	104178156	104310976		TAAAAACAACAACAAATACTTTTATTAATTCGGGGAGCCTGGTCACCAACTGGATGCTCA
ASHG19A3L0000973	87.7458	76.6131	6.37669	6.341	noncoding	AK127645	lincRNA-TCF4-3	lincRNA	2558	chr18	-	53670843	53858493		CAGTTTGCCCTTTGCAGATGTATTGAAATAGTACTGAAATTTACTGATTTTCCCTCATGT
ASHG19A3L0000281	325.249	494.541	8.25854	9.04876	noncoding	DA194797	lincRNA-ZMIZ1-6	lincRNA	549	chr10	+	79938961	80140387	uc001jzw.1,	TTTGAGAATTGGGCTGTCTGGCTCTCCCATCACCCATTTGGCCACCAGCTTTGGTCCCAG
ASHG19A3A053267	56563	41339.9	15.7655	15.3764	noncoding	BC040578		NRED	3284	chr15	+	93438055	93441314		CCAGATAATAGTTTTTATGCCTGGAATTTTTTGCAGTTTGATTTGTATGCGTATGACCTC
ASHG19A3A055111	326.118	241.313	8.26282	7.99699	noncoding	uc001wjc.2	FLJ00089	UCSC_knowngene	2351	chr14	-	23765585	23770748		TTGCATGCATGCCCAAAACAACCCTGAAATGATCATAGTTTCTGACTGTGCTCTGCCTTC
ASHG19A3L0000010	278.58	272.455	8.03764	8.17593	noncoding	AA179681	lincRNA-KCNA10	lincRNA	502	chr1	-	111107981	111108483		AAACAATTAGCTTAAATTTTTCATTAGCTGCTGGTTTCCTCTGCAGTTCCTGCCTCCACC
ASHG19A3A020465	7231.68	5935.71	12.7426	12.6197	noncoding	ENST00000441207	RP4-742C19.11	Ensembl	421	chr22	+	39551529	39551950		CTTCAGCTTGCAAATCATACTGGGTACATCAAAGTTGACTGGCAACGAGTGGAGAAAGAT
ASHG19A3A027375	132.328	202.035	6.96636	7.74366	noncoding	uc003kwu.1	BX538252	UCSC_knowngene	916	chr5	-	131701645	131705196		GGAGTAGTCAGCAATTACTTGCCTGAGGAAGGGAAGGCCTCCTCCTTTAAGAAAAGAATA
ASHG19A3L0003029	347.176	350.928	8.34678	8.54543	noncoding	DB090998	lincRNA-GPHN-3	lincRNA	556	chr14	+	66217102	66217658		CATGGTCTTTAATCTTGTCCCCTTACCCCATTCTCAATCAGTTTTGAATCTAGCATCTCA
ASHG19A3L0000872	114.489	96.5659	6.76246	6.66546	noncoding	chr16:65796674-65812074+	lincRNA-CDH5-4	lincRNA	15401	chr16	+	65796674	65812074		CCACAGCCTTTTCCATCTATCCATATTTCCACTAAAATTATGTGCAGATAATCTGTATAG
ASHG19A3L0003074	295.653	292.024	8.12273	8.27618	noncoding	AA780570	lincRNA-JARID2-3	lincRNA	284	chr6	+	15206136	15206420		TTATGAATAAGACCTTCTCCATGTAGTAGGGCAACCTGGCTATCTCTCCTTAGCTGAAGC
ASHG19A3A026985	164.152	166.338	7.27668	7.46131	noncoding	AK022073		misc_RNA	1873	chr5	-	77293797	77295669		CCTGTGCCTTTGCAGGTTCTAAAATGATTCTTTTCAGACTTAGAGTCAAAGTAGCTAAAG
ASHG19A3A050863	227.339	209.963	7.74348	7.79925	noncoding	uc001ejn.1	BC070106	UCSC_knowngene	1888	chr1	-	143424332	143467651	NM_001033515,	GGATCCCAGCGGTGGTCGTGTAGCTGAGCAGGCCTGGGGCTTGGTTCTATGTCCCTGTGG
ASHG19A3L0001487	253.969	231.957	7.90611	7.94178	noncoding	AI703192	lincRNA-ZNF141-2	lincRNA	458	chr4	+	302433	302891		CACATTTAGGAGCAGCTATAGGGCAAATACCTAGAGCACACATAGAAATCACACATAACC
ASHG19A3A054939	211.268	166.026	7.64116	7.45832	noncoding	ENST00000366408	RP11-375F2.2	Ensembl	1129	chr1	-	168873142	169056243		ATCTTAAGACAACACACAGTGGAGATGTGCTTTACGTAATTGGCCTGCCCTGTGAAAACC
ASHG19A3L0003556	81.5734	68.5061	6.27211	6.17782	noncoding	chr8:66027310-66057986-	lincRNA-CYP7B1-4	lincRNA	30677	chr8	-	66027310	66057986		ACCTAGATTGAAATCCTCATTTCAGCTCTTACTTTCCATGTGACCTTGGGACAGGACTTA
ASHG19A3L0002620	199.675	217.607	7.55507	7.85204	noncoding	DB340468	lincRNA-KLF13-2	lincRNA	578	chr15	+	31598146	31598723		ACTTTGGGGTGATGTCCTCCAGCCTCTGCATCTTTCCTGGGTCAGACTGGGAGTTCTGAG
ASHG19A3A039795	13092.8	12734.4	13.6099	13.7087	noncoding	ENST00000397222	RP4-774G10.1	Ensembl	778	chrX	-	45918185	45918963		TAAAATTGCTGATGTGGGACACTTAAAGTACTACTTGGCTCCCAAGATGGAGGATGAAGA
ASHG19A3A042652	179.265	82.1466	7.40117	6.43587	noncoding	uc001jab.3	ZNF37B	UCSC_knowngene	10237	chr10	-	43008962	43048256		GCCAGCTGGGAGGTGGACATTTTTAGGCAAGTGACATTTCTCATGTTCTTTTCTTGTTTG
ASHG19A3L0000737	826.439	916.356	9.60211	9.92248	noncoding	DA919949	lincRNA-C14orf101	lincRNA	566	chr14	+	56777653	56811719		AAGGCCCATGAAAGCTGTAATGACTCCTTACCATGAAGTTCTCTCTCCTGATACCATGTG
ASHG19A3L0001563	533.776	399.292	8.96656	8.73403	noncoding	chr5:100383976-100436626-	lincRNA-ST8SIA4-2	lincRNA	52651	chr5	-	100383976	100436626		GTAATTTTTTCCTCTTCTGCCTGGCCTTACATGGTTGGAGCATTTGGCAAAAGGTTATAC
ASHG19A3L0002517	96.6636	122.413	6.52408	7.0195	noncoding	DB317923	lincRNA-MED13L-4	lincRNA	493	chr12	-	116858413	116858906		ATTTATAATGCCTCCACAGCTGTTTGAGCACAGCTCCAGCTAAATCTGTCCCATGTTCTG
ASHG19A3A024392	1035.63	799.749	9.93296	9.73143	noncoding	ENST00000502331	OR7E94P	Ensembl	364	chr4	-	80508914	80509278	ENST00000306515,	ATGCAATCGCATAGCAGAGTCATCTCTTATGCGGGCTGCCTGACATAGATGTCTTTCTTT
ASHG19A3L0001052	292.502	311.898	8.10836	8.37529	noncoding	chr2:122573205-122584730+	lincRNA-CNTNAP5-2	lincRNA	11526	chr2	+	122573205	122584730		CAGTGTCCCCTCTGCCTAAATTTCTATCCTAGTGTTATAGCAAGAATAATGCCTGGAGTG
ASHG19A3A025994	145.609	108.246	7.10177	6.83772	noncoding	NR_027105	LOC285419	RefSeq_NR	566	chr4	+	124573939	124851518	ENST00000508111,	AAGACCCAAATCGGAGCTTCATCCCTGCATGGTTCATTTTGCTTATTTGGCAAACTTGCC
ASHG19A3A030227	3556.56	3125.47	11.7223	11.683	noncoding	uc003plc.3	SNHG5	UCSC_knowngene	1078	chr6	-	86386725	86388440		TGGAAAAACGCCTTGGAGTGTGACATTTCTGCGAGAATGCTTAAATACCGATTTCCCGCA
ASHG19A3A028493	113.39	142.103	6.74992	7.23095	noncoding	DQ275636		RNAdb	682	chr5	+	87972389	87973039		ATTTCTAAATAATTTTTGTGCTGATTGCCTGAGAGGTGCGGCATTCCCCGCCCTATTGCT
ASHG19A3L0000310	85.9384	66.8255	6.34379	6.14093	noncoding	exon847+	lincRNA-ZW10	lincRNA	440	chr11	+	113591786	113592225		ATAAGCCACCTAAAGACATAATCAGCTCACCACCATCCTTTAAGACCCAGGTTAAATGTC
ASHG19A3L0000778	573.23	574.13	9.06527	9.25751	noncoding	CV387322	lincRNA-SEL1L-3	lincRNA	581	chr14	+	81889991	81890556		GAGCAAATGAGCACCTTTCAATGGTGACAACTCACTCATCCCCACACTCCTAGTTTATTT
ASHG19A3L0002433	104.116	103.052	6.62927	6.76426	noncoding	chr9:16334709-16341952-	lincRNA-C9orf93-1	lincRNA	7244	chr9	-	16334709	16341952		CTGTGCTGAGTGTTTGATCTTCTGTTATCTGATGACTAAAGTCCTGTGTTCCATTGACAC
ASHG19A3A035449	609.532	375.211	9.15613	8.64375	noncoding	uc003wpf.1	AK128400	UCSC_knowngene	3993	chr8	-	590407	594400		TTGTGCCATCTGAGACTCATGGGAGTAAATCTCCTCTTTCATAGTAAAATCTCATTACAG
ASHG19A3L0000835	250.488	291.79	7.88656	8.27459	noncoding	chr15:78112795-78125995+	lincRNA-TBC1D2B-2	lincRNA	13201	chr15	+	78112795	78125995		AATGTTAATATGTTCTAAAAGGGTCAGGGGTCACAAGTGTCACCCATCCCCCAGGAGTTA
ASHG19A3L0000044	561.968	555.7	9.03597	9.21512	noncoding	chr1:191998602-192012102-	lincRNA-FAM5C-3	lincRNA	13501	chr1	-	191998602	192012102		TGACTTGGTTTTCTATCTTCCCCAAATACTTAATCATCGGATTAGATCTCCAAGGTCAAA
ASHG19A3L0001804	249.962	166.695	7.88265	7.46561	noncoding	AA219474	lincRNA-RUNX2-2	lincRNA	361	chr6	-	45828558	45828919		ATTGCCCTCCAGATATCACTGTCCTAGATATAGAGTGAGCTGAGTACTCTGAAAGCTATG
ASHG19A3L0000606	87.0991	77.1001	6.36481	6.34884	noncoding	chr13:28387150-28402025-	lincRNA-GSX1	lincRNA	14876	chr13	-	28387150	28402025		ATATCTCACATTCCCAAGGATGATCTATTGACCTCCACAATATGTCTGAGTCTGCTGCCC
ASHG19A3L0000505	2114.96	1611.83	10.9553	10.7411	noncoding	BC002759	lincRNA-SLC48A1	lincRNA	1041	chr12	+	48165369	48176533		TTCTGGGGGGCCCTTTCAGAGGCACTTTTAAAGCAAATAAAACATTTATTGTTCAAAAAA
ASHG19A3A013808	588.778	757.233	9.10604	9.65428	noncoding	NR_024444	LOC100133985	RefSeq_NR	661	chr2	-	70351168	70352448		TTTTCTCTACTTGGATCTGAGAACTCTGTCCCTCCAGCCCTGCGAGCGCTTTGCCAGGGT
ASHG19A3L0000943	239.593	79.797	7.8188	6.39586	noncoding	BP312547	lincRNA-RBBP8-1	lincRNA	581	chr18	+	20494080	20548814	NM_203292,NM_203291,NM_002894,	AAAGTTTTAGAAGATCGGTTAAGAGCAGGCTTATGTGATCGCTGTGCAGTAACTGAAGAA
ASHG19A3L0003498	310.33	337.322	8.19245	8.48638	noncoding	CK905913	lincRNA-TTC17-2	lincRNA	587	chr11	-	43606137	43694943		TTCTAAGTTTATTCATCCAAGCTCTTCATCACCTGTGGCCTTTGAGAACTCCTCCTTCAG
ASHG19A3L0000326	191.361	179.463	7.49621	7.57287	noncoding	DT216792	lincRNA-SORL1-3	lincRNA	716	chr11	-	121632507	121633223		CAAGTTCTGCCTTTAACTGACCTTTGTTGAGCTGTAATCTCTTCTGACCTCAGTTTCCTC
ASHG19A3L0001752	158.496	115.341	7.22864	6.92978	noncoding	BE439827	lincRNA-MAS1	lincRNA	652	chr6	-	160373545	160374196		TTAGAATCAGGTTTTCAAAGCTTTTGTCAGTGAATTTCCCCGCTCAGCTCTTCAATCCCA
ASHG19A3L0002170	91.1718	181.929	6.43479	7.59099	noncoding	AK301414	lincRNA-PLEKHF2	lincRNA	1474	chr8	+	96037295	96088396		CCCTGGTTATATCATAAAAGGGCTCAATTTTTACATGAGGTCTCAATGGTCTTTTTACTT
ASHG19A3A050449	151.555	142.199	7.16225	7.23225	noncoding	BX648169		misc_RNA	3046	chr1	-	118227363	118230400		TTGACATTTTCTCCAACATGATGGGCTGTCTCGAAACTTTTGTGGCTGCTGTTCCATCTG
ASHG19A3A032054	40134.3	30077.4	15.2414	14.9345	noncoding	ENST00000406671	RP3-351K20.4	Ensembl	891	chr6	+	127683657	127684548		AAATATCCCTTGCTCAGAAGAAAGATTGGGTAGCTCAAAAGAGGGCAGACTTCCTCAGAG
ASHG19A3A048490	25976.5	24460	14.6002	14.6459	noncoding	ENST00000498198	RP11-428G5.1	Ensembl	289	chr12	+	32050753	32051042		GAAAAAACATTAAAGGTGTCATTGCCCAGGGTATTGGCAAGTTGCCATTGTGCTCTCCCA
ASHG19A3L0002031	133.165	131.193	6.97487	7.11877	noncoding	BC157840	lincRNA-SLC45A4	lincRNA	3367	chr8	-	142220627	142264225		GTGTATTTAAAGGAACGACTGTTTAATGTACTTGATGGGCCTCTGGTCTTGCCGTGTCTC
ASHG19A3L0000162	400.967	438.19	8.55605	8.87241	noncoding	AA493815	lincRNA-JUN-2	lincRNA	355	chr1	+	59191343	59191690		TATCACCCATCAGATTGCCAGAGGATGAAATTTCTTAGAAGCCCCTCTCACATCATGCTC
ASHG19A3L0001684	83.7833	112.967	6.31004	6.8994	noncoding	CF135687	lincRNA-LHFPL2	lincRNA	600	chr5	-	77806192	78065844	NM_005779,	AAGTTGTTCATTAAGACTTCCCAGCATTCCTACAGATATAAATAGGTGAGGCCGCAGGCG
ASHG19A3A025371	92.4834	85.1255	6.45739	6.48468	noncoding	ENST00000511272	RP11-324H7.1	Ensembl	1646	chr4	+	26113486	26115461		GAAAAATCAGCTCTCACCAAACATCAGAGAATTCACACAAGGCCAAAAGGTCTTTCCACA
ASHG19A3L0001800	111.233	109.18	6.72338	6.84912	noncoding	CN281635	lincRNA-CDC5L-3	lincRNA	717	chr6	-	44619407	44637427		GAACAGAAATTAGACGTGACCCTTCCTTTGACAGGAATTTATCACCAGGCTCTATCTCAA
ASHG19A3A007410	182.479	153.355	7.42828	7.34517	noncoding	NR_026765	C8orf75	RefSeq_NR	1413	chr8	-	29578777	29605625		TGCTTTCTGTACAGCCTGCTGAACTCTCTGCCCAAATTTCAGCTGTCACAGAATGAGTGA
ASHG19A3A013492	488.164	807.876	8.83526	9.74654	noncoding	AF085351		NRED	207	chr2	-	37068325	37068531		TCTTTTTGGTCAGCCTTTTAACAAGCAAGACAATAAACTCCTTTTGTCAGAATCGATTTG
ASHG19A3L0003495	65.0727	94.2795	5.94569	6.63214	noncoding	AA722342	lincRNA-TNKS1BP1	lincRNA	519	chr11	+	57060753	57061272		ATTTTTGCACTTCTTTTAAAGCTCAGGCTCAGAGAGAGAGTCCCCAGCTCACAAGAGTCA
ASHG19A3L0001747	81.1559	84.4046	6.26373	6.4737	noncoding	chr6:150606082-150619632-	lincRNA-PPP1R14C	lincRNA	13551	chr6	-	150606082	150619632		GCCCCTAACCCAGAAATCCTGCTACTTGTACTGCAGAATTAGTTCTTTTTCTAAGCCTCT
ASHG19A3L0001765	1887.99	1874.48	10.7982	10.9641	noncoding	exon3668+	lincRNA-DACT2-3	lincRNA	101	chr6	+	168673026	168673126		CTTGTGCACTGCCCTCCCCAAACATCCTTAAACATTTAAATGTTTCACCCCTAAAACAAA
ASHG19A3L0001394	1554.27	1557.78	10.5154	10.6877	noncoding	chr3:45207146-45221396+	lincRNA-TMEM158	lincRNA	14251	chr3	+	45207146	45221396		AAGATGTTTGGAAGAAAACATGACCTAGTTTCTCTCCCCAAGATAACTGGCTGGCCTTGG
ASHG19A3A047146	380.684	397.201	8.48368	8.72485	noncoding	uc001qgd.2	AX747213	UCSC_knowngene	685	chr11	+	130184418	130263694		CTGGTGGTAAGCAAAATACTATTCCAGCAAGTGATGCCCCCAGTCTCCTAAGGATATAAG
ASHG19A3A036944	22169.3	19504.5	14.3555	14.3318	noncoding	ENST00000439405	AF186191.1	Ensembl	1155	chr8	+	134420230	134421385	NM_003932,HIT000301503,	AAATTGTCAGCCAAATTTGGAGGTCAAGTGTAATGCCCTTCTGATAAATAAAGCCCTTGC
ASHG19A3A009749	359.861	436.75	8.40219	8.86814	noncoding	AK090797		misc_RNA	2827	chr17	+	53248165	53250992		AAAGCTGTGTCAGCAATGAGATTTGTTTCATTGTTTTGCCTTGTTTTGTCATTGAGTTGT
ASHG19A3A038963	709.76	879.848	9.38062	9.86503	noncoding	uc004aul.1	DM004128	UCSC_knowngene	103	chr9	+	96941107	96941210		TAGTAGGTTGCATAGTTTTAGGGCAGGGATTTTGCCCACAAGGAGGTAACTATACGACCT
ASHG19A3L0002452	9428.05	7517.83	13.1304	12.9503	noncoding	BX112397	lincRNA-FAM183A-2	lincRNA	753	chr1	+	43464813	43465491		TGGACAAACTCCGTGACCACCTATATAGATCTTTAATAGGAATCTCCCCTGGACAAATTT
ASHG19A3L0000269	484.747	532.197	8.82595	9.15134	noncoding	BG722956	lincRNA-EGR2	lincRNA	833	chr10	-	64575623	64679660		ACATTGACACTGACTGGAGCAGAACCAGGTCGCCGGATCTCCCAATATCCCAGCCAGCTT
ASHG19A3L0000764	267.663	196.241	7.98297	7.69953	noncoding	DA697045	lincRNA-RGS6-2	lincRNA	565	chr14	+	72315325	72382763		AGAAATAGGGACCGGCTGCTTTGGAAGAAACATGCTAGGAAATGTGGACACAGAGAAACA
ASHG19A3L0002202	75.7372	70.9433	6.16347	6.22701	noncoding	DB458469	lincRNA-C9orf150	lincRNA	483	chr9	-	12959852	12960335		ATTTTGTACCAGATGTGATTGGAGGAAGCAGATTCTAAAGTCACCCTTCTGCTGGGTTGC
ASHG19A3A034036	66.2789	66.8161	5.97235	6.14037	noncoding	ENST00000447262	AC006481.1	Ensembl	432	chr7	+	20875049	21061771		AACAAGAATACCTGAGATGGAGACTCACCTCTTACCATCAATCTAGTGTTGACTTTGGGT
ASHG19A3L0000801	123.029	161.909	6.86498	7.42356	noncoding	AA496137	lincRNA-GJD2-2	lincRNA	460	chr15	+	34943243	34947932		TTTCAGATACTCCCTTTTATCAGAAGTTACTGGCTGTCTACTTACTGCCATGGCTGCTCC
ASHG19A3L0003317	87.5084	85.1906	6.37286	6.48597	noncoding	DA245301	lincRNA-C6orf118-3	lincRNA	584	chr6	+	164348132	164758314	DA204380,	ATCTTTGAAAGCCTAGTAGACACCCGATGCCTTCAACATGTCTTATATGACCCTTGCCTC
ASHG19A3L0001742	464.014	501.62	8.76344	9.06817	noncoding	CB047659	lincRNA-JARID2-2	lincRNA	386	chr6	+	14118019	14196570	NM_001040280,	GATGTGGACTTGCCCTGCACCGCCCCCTGGGATCCGCAGGTTCCCTACACGGTCTCCTGG
ASHG19A3L0001985	300.066	291.577	8.14378	8.27368	noncoding	AI004797	lincRNA-HAS2-1	lincRNA	460	chr8	-	123552541	123553000		TCTATTCCAACAGGTGGGTCTTGTGAGTTTGTCTCTCCTTTGTTTTGCTGCCAGTCTTCT
ASHG19A3L0002763	93.407	126.856	6.47051	7.07203	noncoding	chr15:70785696-70790995-	lincRNA-TLE3-1	lincRNA	5300	chr15	-	70785696	70790995		TAATGAGCATGCATTGTGAAGTCTGTCTTCCATCAGCAGAAACTCCCTGAAGGTAGAGGA
ASHG19A3L0003261	9684.17	6650.59	13.1669	12.7787	noncoding	AK126918	lincRNA-GLIS2	lincRNA	4466	chr16	+	4364761	4389595	NM_032575,	ATCGTAGCTTATGTTTTCCTCCTCTTGGCTCCATTGCTGTTAGCATAGAGTTTTAAAAAA
ASHG19A3A051643	545.039	546.297	8.99468	9.19033	noncoding	ENST00000500215	AC007686.1	Ensembl	2924	chr14	+	77507406	77535846		ATTAATCAGAGAAACACATCAAGAGTTGTTGCGTGGAGACAGCTTTCCTCCCAGTACTCG
ASHG19A3L0001328	154.643	197.671	7.19046	7.71019	noncoding	DB111273	lincRNA-P2RY1-1	lincRNA	575	chr3	+	152053707	152515360		TAAACCTACAATTTCTGATTGACAATGTTTATTTACTTCTCTTCCACTTTTTTGGGGGTT
ASHG19A3L0003534	138.735	108.612	7.03208	6.84281	noncoding	AA368654	lincRNA-OPTC	lincRNA	281	chr1	-	203482904	203483185		ACCTTTCTGGAGGGTGGGGGAAACCCAGCCCCATTCCTGGCACCTAAAGTTGGAAACTGA
ASHG19A3L0002527	178.21	209.029	7.39276	7.79354	noncoding	chr7:73684091-73687309-	lincRNA-RFC2	lincRNA	3219	chr7	-	73684091	73687309		TCAGGGGATATTGATTGCTTAACCTTCCCGGTGCATTCCATTTTCCCAATCATTGAGGTC
ASHG19A3L0002503	59.8337	91.3671	5.82003	6.58281	noncoding	chr4:53420371-53428337-	lincRNA-SPATA18-2	lincRNA	7967	chr4	-	53420371	53428337		TTTATTCATTCTTATGCTGCCAGCACTCATCAGTTCATTCACCAACTATTCAATACCAAC
ASHG19A3A048155	188.335	173.338	7.47244	7.52163	noncoding	uc001uhk.3	BC040060	UCSC_knowngene	586	chr12	-	127215246	127256773		AACTATGACCTAGGACCAGGGCCTTCAGGAATCTTCACCCCTAACTTGAACTTCATAACA
ASHG19A3L0002548	1467.15	1900.42	10.4343	10.9856	noncoding	BU149307	lincRNA-C1orf55	lincRNA	973	chr1	+	225983286	226302302		ATTTCTCCGCCCACCAAACAAAAAAGAGGGCCGCCCCGCCGCCGCACCATTTTGTGTGGG
ASHG19A3A027121	54.3033	73.2366	5.67759	6.27237	noncoding	NR_015369	FLJ42709	RefSeq_NR	3380	chr5	-	92745064	92906499		TTGTTTTGTAATCTCTCAGTTTAGAGAGTTGATATGTCCCGCGCCATCAGCCCGCTGAAT
ASHG19A3A022479	6668.84	6594.11	12.6191	12.7658	noncoding	ENST00000413128	RP11-420K5.1	Ensembl	774	chr3	+	39685128	39686196		GAAGGTGTAGAACAGGGTATGGATGATGAATCAGATGAAAAGGAAGCAAACTCACCTTAA
ASHG19A3L0000141	684.772	600.115	9.32921	9.3206	noncoding	exon91+	lincRNA-KNCN	lincRNA	175	chr1	+	46989750	46989924		ACTCTTCAGAGCCCAGCCACATGCCACCTGCTCCAGGAAGACTTGCCAGATTATCACAGG
ASHG19A3L0001638	1037.39	1019.69	9.93505	10.0783	noncoding	chr5:3223050-3239025-	lincRNA-C5orf38-2	lincRNA	15976	chr5	-	3223050	3239025		TGAAGTTACCTGATGATATATGGCTTTTCCCCCACCTGCATCTGACTCTAAGGTTGTTGC
ASHG19A3L0001263	3013.7	3282.15	11.4697	11.7549	noncoding	BM976593	lincRNA-CDS2	lincRNA	719	chr20	-	5193468	5194179		ATAGCATTTATCAAGACCCCATTGTGCTTTCACACCAGTCTCCCCAAAGTGGTGTATGAC
ASHG19A3L0002837	1265.71	1740.2	10.2169	10.8567	noncoding	CK819477	lincRNA-APLN-2	lincRNA	356	chrX	-	128809864	128812318		GGGGACTGTTCCGTCAGAATGAGCAGCTTAAAAAATGTCGCCTGTGAGGTCTCAGCTCGT
ASHG19A3L0002226	2115.62	2468.93	10.9556	11.357	noncoding	BX105755	lincRNA-KIAA1432-2	lincRNA	463	chr9	+	5578474	5578936		CTATTGCTACAGGCATGACACATTCAGGAACTAGAAACAGGAAATAATTCCCCCTCCCAC
ASHG19A3A014514	2143.92	1633.87	10.9744	10.761	noncoding	ENST00000392819	AC016732.2	Ensembl	969	chr2	-	158067017	158067987		TAGAGCTTATACATATCAGGTTGCAACCAGGTGGTATCAGGCCCCTGAGTTACTATTTGG
ASHG19A3A021365	1419.99	1485.6	10.3837	10.622	noncoding	ENST00000468320	MT-ND4L	Ensembl	276	chr3	-	106614575	106615255		GGTTTAGCCTTACTAGTTACAGTCTCCAACACCTTTGGCCTAGATTATGTACAAACCTAA
ASHG19A3L0003134	180.614	191.004	7.41119	7.65936	noncoding	BF737354	lincRNA-VDAC2	lincRNA	545	chr10	+	76956241	76956749		CGATACACTGTCTCTCAACAAGCCTTTGGAATTTCCTTCCTTTGGTTTTCTGCCATTTTT
ASHG19A3L0001167	1241.66	1182.25	10.1921	10.293	noncoding	chr2:237543636-237554786-	lincRNA-CXCR7-1	lincRNA	11151	chr2	-	237543636	237554786		TCTCTGTGTCTCTCTTTGTCCTCTCCTCTGCTTGTAATGACATCCATCATTGGGTTTAGG
ASHG19A3L0003049	166.915	207.118	7.29898	7.78067	noncoding	BG258490	lincRNA-DYNC1H1	lincRNA	800	chr14	+	102415933	102418786		TTGAGCAGCAGGTGATGGTCAGAGGTAATACGTGAGCCACCACGCCCGGCCTATAGTCAT
ASHG19A3A022335	83.4177	130.322	6.30326	7.1095	noncoding	ENST00000448265	AC139618.1	Ensembl	2329	chr3	+	18004063	18310408		CTTCCTTGATGACCCAGCTACTTTACATCTCTGGATGGAATCCTCCTCTTTGCTCTAATG
ASHG19A3A025745	75211.6	70260.9	16.1904	16.1136	noncoding	ENST00000439897	RP11-91I11.1	Ensembl	151	chr1	+	92065727	92065878	uc002qbl.2,NR_003699,NM_001000,ENST00000495111,ENST00000477662,ENST00000465012,ENST00000459631,ENST00000446011,ENST00000424573,	CTGGTAATAAAATCAGGTACAACTCCAAAAGGAGACATTGGAGAAGAACTAAGCTGGGTC
ASHG19A3L0002786	89.3096	105.203	6.40482	6.79409	noncoding	AK293821	lincRNA-SYNCRIP-2	lincRNA	1499	chr6	+	86303006	86304505		AGCACTTTCATTTGACCTTCATGCATTCACCCCATGGTGTAGGTACAGTACTATAGTTTC
ASHG19A3L0000158	88.0495	92.2615	6.38275	6.59864	noncoding	chr1:54928212-54960380+	lincRNA-ACOT11	lincRNA	32169	chr1	+	54928212	54960380		ATAGCACCCATCCTAACATAGTTTAATCATCCTCAGGAGATTGGCAGCCTCCATCTCTGA
ASHG19A3A010129	478.75	149.966	8.80968	7.31403	noncoding	NR_026849	C18orf18	RefSeq_NR	1322	chr18	-	5236723	5238028		AAGGATACTTTGACAGTTTTCATTTGTCGTCTACATGTATATGGTACGTTTCATTCTGCC
ASHG19A3A048508	177.509	143.997	7.3877	7.25079	noncoding	ENST00000435559	RP11-86H7.7	Ensembl	2272	chr1	-	95086706	95089740		ATTTTCATAAGGAAAGTTCTGTTAGGAGAGCTGCCTGAAACAACACCTCTGCCTGTGCTC
ASHG19A3A055197	269.977	145.365	7.99496	7.26632	noncoding	uc003gjk.1	LOC93622	UCSC_knowngene	1602	chr4	+	6675817	6677774		CGCGGCGGGGAGTGTCCCGCGTGGAAGGCGCTGGGTGGCCAACTGACGAACTGTGTTCAC
ASHG19A3A050481	189.338	223.514	7.48018	7.88627	noncoding	uc001vrj.1	CR604228	UCSC_knowngene	1459	chr13	+	111474474	111491472		ATTTTCTGCAGATTACTTTCTACAAGACGATTTGGGACCTCAGTTTACCACCTCCCAGCG
ASHG19A3A035945	649.173	692.023	9.24974	9.52314	noncoding	uc003yet.2	BC067244	UCSC_knowngene	2078	chr8	-	92080138	92082324		TCAGAGGACCTCTTTAATCTTTGATTTTGGTCCCTGTTTCTAAGAAAAGCAACTGAAAAG
ASHG19A3A027128	925.465	755.708	9.76501	9.65134	noncoding	ENST00000411846	RP11-483I13.4	Ensembl	1570	chr1	+	108815564	108880475		ACTTGTGGTCAGTTAGCCAGTTTCTCTGTGAACCTTATTAGAACTCGCATGCAGGCTTCA
ASHG19A3A048942	114.12	90.268	6.75872	6.5656	noncoding	NR_024037	RMST	RefSeq_NR	2099	chr12	+	97858798	97927544		GGATTTAAGCTGACTAACATTTTGAAAGCCCAGCCCATTTCATTCACAGCAGGATGGCAG
ASHG19A3A028083	84824.6	81404.3	16.376	16.3116	noncoding	uc003jhx.2	CR613092	UCSC_knowngene	708	chr5	+	33162265	33162973	NM_001012,ENST00000467270,ENST00000392301,	CTAGAGGGCAAAGGGTTGGAGTTCTATCTTAGGAAAATCAAGGCCCGGAAAGGCAAATAA
ASHG19A3L0001874	69.5411	71.1567	6.04179	6.23219	noncoding	chr7:140344106-140355056+	lincRNA-ADCK2	lincRNA	10951	chr7	+	140344106	140355056		ATAATCTCTCAACTTCACCTGTGTGGGAGCTGACTCTAGCTCTTTACAATGCTACACTTT
ASHG19A3A050012	347.469	276.723	8.34784	8.19945	noncoding	uc010aav.2	BC132836	UCSC_knowngene	390	chr13	+	30512060	30524588		GTTGATGCTGAAATGTTTCCTTCCTCTACATATTCCATGATGCGTCCTGTGGGGTTATGC
ASHG19A3A013917	86671.5	89138.7	16.4081	16.4288	noncoding	ENST00000426710	AC013262.1	Ensembl	252	chr2	-	81893600	81893852		TCGCAAGATGTCTTACACTCATGAGCTGTTCCCACATTAGGCCTAAAAACAGACACAATT
ASHG19A3A013655	88.9539	160.111	6.39778	7.40855	noncoding	ENST00000421406	RP11-488L18.4	Ensembl	1465	chr1	-	247353152	247372795		CCTTTAATACCTGCTCATGTCTTACTCAGGACCAGAGTTCATATTGAACTAAAGAATTAT
ASHG19A3L0000742	224.84	185.115	7.72748	7.61594	noncoding	BC032831	lincRNA-DAAM1-1	lincRNA	2557	chr14	-	59895739	59932059		AGGTGTAGCACTTTCAGAAGAGGCTATCAAAGAAAAGAGATGAACTTGGAAGCAAGAGAT
ASHG19A3A031013	1014.92	1581.97	9.90313	10.7124	noncoding	ENST00000447179	RP11-146I2.2	Ensembl	177	chr6	+	14841454	14871959		ATCCTCCCCACTACAAGCCATTTTCTAATGTGTTTGATGTGTATCCTTCTATTTCGTTAA
ASHG19A3L0000016	290.174	197.474	8.09752	7.70822	noncoding	chr1:112541627-112559477-	lincRNA-KCND3-2	lincRNA	17851	chr1	-	112541627	112559477		AACAAAGATCCAAGGTTCAGGTCAGGGGAGAGAGAGAGAGACCTTTATGTCTATGACAAT
ASHG19A3A052918	439.639	449.072	8.68788	8.90866	noncoding	uc010bfv.1	AK123700	UCSC_knowngene	1913	chr15	+	57595780	57599965		ATGGGAGAATCTTTCGACGCCAAATTCTTCCCATCTCCTGCCTAGTATGTATCACTACAC
ASHG19A3A015124	125.968	98.0564	6.89745	6.68803	noncoding	ENST00000415506	AC073254.1	Ensembl	743	chr2	-	233445657	233449243		TCTTCAAGAGGTTTCTGCCTGGGCATCACAATCAGCACACATTTGCTCATACACATACCA
ASHG19A3L0000463	627.947	782.831	9.19811	9.7022	noncoding	AW850155	lincRNA-AEBP2-1	lincRNA	700	chr12	-	19686464	19687155		TGCCACGTAGCCCAGGCCTAGCTCCCTCATGCTCTTCAGGTCGCTGCTCCGACATTACCA
ASHG19A3L0002180	103.52	98.1937	6.62117	6.68981	noncoding	chr8:99342599-99355474+	lincRNA-KCNS2-1	lincRNA	12876	chr8	+	99342599	99355474		TTCTAGATTTATAGACAATGACCACTTACTAGTTGCCCCCATTGCTGACAGTCGGCTTCC
ASHG19A3L0001238	185.13	215.739	7.44937	7.83778	noncoding	chr2:91595323-91623173+	lincRNA-TEKT4-3	lincRNA	27851	chr2	+	91595323	91623173		TATATGGATCACTTGTTTCTGTTGAGTTACAGATTCAGCTGGCTATTTCTCCCAATGTTA
ASHG19A3L0001088	147.237	122.383	7.11877	7.0188	noncoding	chr2:148345005-148356555+	lincRNA-ACVR2A-4	lincRNA	11551	chr2	+	148345005	148356555		TATAAAATGCCCTGAAATGTTGTGCTGCCATGGTGGGCCCTGGAAAAGTCTCAGGTTATT
ASHG19A3L0003326	930.322	1056.28	9.77104	10.1265	noncoding	AK097798	lincRNA-ZNF676	lincRNA	2091	chr19	-	22361892	23158666	NM_001001411,	CCTTTAAATGGCTGTCACACTTGATTGTAGGTAAGATAATATACTGGAGAAAACTACTAG
ASHG19A3L0001177	83.0601	176.949	6.29724	7.55351	noncoding	AW177676	lincRNA-CAPN13	lincRNA	119	chr2	-	31124660	31124765		AAGATTTAGACCTCAAACCATGCTTGGAGAATCATCACCCTAGAGCAGTCTCACCATCCT
ASHG19A3L0003277	65.3376	65.6579	5.95308	6.11666	noncoding	BG900305	lincRNA-LPP-1	lincRNA	381	chr3	+	187467858	187468152		CTCTACTACCTAAGGCTAGAAGTGGAAAAACTTGATTTGCGTGTTGTGCCTGCATTTTTT
ASHG19A3A025992	118.913	124.278	6.81545	7.04011	noncoding	ENST00000503950	RP11-381N20.2	Ensembl	539	chr4	+	124411422	124443261		AAGATCTGATATCCTGTGTATGGCCACCACCTAACACTGCTCACTTCTACATGTAAACCT
ASHG19A3L0000618	316.975	356.143	8.22136	8.56755	noncoding	BE179605	lincRNA-TRPC4-3	lincRNA	541	chr13	-	38767368	38767908		TATTAAGGGACTTTATATTGTAAAACCCTGGAATCCTTCCCAGTCCACCCTCAACTGACT
ASHG19A3L0001003	213.135	195.956	7.6537	7.69745	noncoding	CB069168	lincRNA-GALR1-4	lincRNA	507	chr18	-	75008831	75009338		ACGCATTTTGTTACCTTCCTTTCCTGCTTGAAGTCCATGAAGTCTGACTTCCCACTATTC
ASHG19A3L0002209	325.464	288.533	8.25947	8.25947	noncoding	BE083440	lincRNA-COL5A1-1	lincRNA	369	chr9	+	137363031	137363837		AACTCCTCGACCTGGATCATCCTGAGCCTGGTAACTCCTGAGCCTGGGGTCCTCCTGAGC
ASHG19A3L0001130	11468.7	13258.3	13.4131	13.7614	noncoding	BG926534	lincRNA-SLC39A10-1	lincRNA	617	chr2	+	194306582	194307112		CTTCTGCCTGTCTCCAGCTTCCTTCTGCCTTTCTCCCCCTTCCATCTTTGCCAAAAAAAA
ASHG19A3A043346	116.414	125.228	6.78597	7.05223	noncoding	NR_002791	EMX2OS	RefSeq_NR	7282	chr10	-	119243804	119304579		TTTGGTTTGATTTTTTAAAATATGGGGAGGGGGGTGACATCTACCCGATTCTAGGCTCCG
ASHG19A3L0001035	176.281	149.196	7.37729	7.30557	noncoding	DB100323	lincRNA-ACOXL	lincRNA	593	chr2	+	111448347	111449068		TTCTTGGTCTCATCTGTTTTCTCCACAGTCTCAAATGCACTGTGTCACTCTAAACTGGGT
ASHG19A3L0002899	216.529	237.326	7.67519	7.97134	noncoding	chr12:106625035-106628293-	lincRNA-NUAK1	lincRNA	3259	chr12	-	106625035	106628293		ATACCTCTGAGCTACTAATCTGTTTTTCCAATAATATCTGGACACCTTGCTGCCCCCTAA
ASHG19A3A035432	87453.1	103533	16.4309	16.6522	noncoding	ENST00000452777	RP11-318C24.1	Ensembl	171	chr1	+	175891110	175891281	NM_001032,	ATGTGCCCCCAGTGTTTCCGTCAGTACGCGAAGGATATCGGTTTCATTAAATTGGACTAA
ASHG19A3A051785	189.926	212.709	7.48385	7.81829	noncoding	CR620657		RNAdb	401	chr14	+	101297417	101297818		GTGAATGTTTCTGTCACTTTTTGCAACCGTCCATTCATTTGATCCTCACAACTCCCTGTC
ASHG19A3L0003095	74123.7	61888.3	16.1615	15.9385	noncoding	BG184634	lincRNA-OTP	lincRNA	320	chr5	-	76986606	76989146	NM_004607,	GGTCCATTTTACAATCCATTATTTTTGACCACTGCTATGTGTTCAAGTAGTATGAGAATG
ASHG19A3L0000521	115.195	118.962	6.77103	6.97627	noncoding	chr12:63792383-63819758+	lincRNA-DPY19L2	lincRNA	27376	chr12	+	63792383	63819758		ATATATACAGTGGAGTACCAGCTACAGATGAAAGATCAGCCTGTTCTGATGCCCCCTGTA
ASHG19A3A046296	443.443	247.258	8.70036	8.03368	noncoding	AK095484		misc_RNA	2135	chr11	+	43665787	43667921		CTTCCCTCTAACCTGACCTAAGTGTGTCTTAGAATGTTAACTAACTTGACAATTGAATAA
ASHG19A3L0001414	139.763	114.912	7.04366	6.92365	noncoding	BI753279	lincRNA-EIF4E3-2	lincRNA	670	chr3	+	71676884	71677709		AATTTGACGTCATTTAGCTCTCCTTACTCTGAGCTGTGGACTGCATCAAACCCAACTCGA
ASHG19A3A025422	255.054	241.222	7.91348	7.99636	noncoding	ENST00000512170	RP11-213G21.2	Ensembl	500	chr4	+	38565623	38572292		AAGCAAAGAAGATGTTACCCACCACCACCTCTTACAGAAATGGCAGAATCTCTGGGAATA
ASHG19A3A045639	598.504	515.83	9.13024	9.10718	noncoding	BX537809		misc_RNA	1733	chr11	-	104599707	104601095		AGATGATGTTGAAATGAATCCTTGCAGACTACATTTAATTCTGTAAATCCTCCCTCGTAT
ASHG19A3A038962	186.662	118.942	7.46095	6.97609	noncoding	BC064349		RNAdb	1448	chr9	+	96938739	96940172		AGCATAACGTTGCCACCTTCAGTTGGAAACGTATCCTTATCTAATAATTAAGCCCTGGAG
ASHG19A3A021807	111.221	86.6222	6.72328	6.50906	noncoding	uc003fah.1	BC015836	UCSC_knowngene	777	chr3	-	155008020	155011471	ENST00000489090,	TCCTGATTGGCTGGATTGTGGGCTGCATCATAATGATTTATGTTGTCTTCTCTTAGAAAG
ASHG19A3L0001982	95.4921	120.317	6.5056	6.99419	noncoding	BU624419	lincRNA-HAS2-3	lincRNA	656	chr8	+	122152288	122157412		ATTCTTGTTCTGTTCTTCCTACTGATACTTCTGGTCTCTGTATCTGGTTCTGGTTAGTCT
ASHG19A3L0000033	133	97.4189	6.97317	6.67695	noncoding	DA807888	lincRNA-LMX1A	lincRNA	596	chr1	+	165089843	165090438		GTTGGGAGATTTCTGGTTCTATCATCATATGTGTTTTGGAATTGTGACCTCCTGCCCCTG
ASHG19A3L0000650	73.1572	106.664	6.11335	6.81511	noncoding	exon1338+	lincRNA-PRR20A-4	lincRNA	181	chr13	+	55163215	55163395		CCTTCTCCCAGGAGATGATTTAATTACCTGCTGAGAATATCTAAGAAACCTACTTCCTCT
ASHG19A3A041079	185.142	217.281	7.44951	7.84987	noncoding	ENST00000423543	RP3-453A3.1	Ensembl	382	chrX	+	57255466	57255848		ATAGGGCTTCTAGTACTTTATCTAAAAAACCTTGAGACACATCTCATCCTCTTCCTTCAC
ASHG19A3L0002906	592.759	718.593	9.11664	9.57643	noncoding	CF887548	lincRNA-NEDD1-3	lincRNA	738	chr12	+	97211559	97269292		ATCTATTTCTTTATCAAGTTGCTTTGGCTTCCCCACTCTCTCCTGCGTTTTGAAAAGAAT
ASHG19A3A043506	1367.02	1762.79	10.3298	10.8743	noncoding	uc001igd.2	BC046483	UCSC_knowngene	1204	chr10	+	1094996	1096200		ATTTCCTCTACCTTTTGTGTGGAATTTAAAATACTGAACTTGTGAGATGAACCTGGTGGG
ASHG19A3L0001877	3933.62	3379.9	11.8654	11.7986	noncoding	chr7:143147778-143169303-	lincRNA-TAS2R60	lincRNA	21526	chr7	-	143147778	143169303		CCAAGATATTAAAAGAATCCCTCTCCTCCCATTTATTCCTAGCAATTGTGTTGTTTCATT
ASHG19A3A019799	280.452	230.149	8.04782	7.92955	noncoding	ENST00000428294	RP3-449O17.1	Ensembl	700	chr22	-	38731766	38794921		GGAGAAGGAAACAGGCCTTTCGGAGGCTCCTCATCCCTCGGAGGTCATCCCTTACTCCAG
ASHG19A3A028085	56.8472	82.5393	5.74441	6.44139	noncoding	ENST00000503577	RP11-113I22.1	Ensembl	517	chr5	+	33229840	33255659		AATTTTCCCCATCAGCTGAAGAGTTTTGGCAATGAACAGCTTGCAGCTGAATCCCCTTCT
ASHG19A3L0003359	3463.8	3411.07	11.6849	11.8111	noncoding	chr2:48624186-48643070+	lincRNA-KLRAQ1-2	lincRNA	18885	chr2	+	48624186	48643070		TAAACAAATCACTGCAGGGCCATTTAAATCTTCACCTTCTCCCCAGAAAAGTCTTCAGCA
ASHG19A3A022806	431.942	412.496	8.66304	8.78285	noncoding	ENST00000485404	RP11-433A10.1	Ensembl	555	chr3	+	72202043	72221401		AGAATGGTTTGTTTCCTTTCGTCTTCCTCCACGATGCATTTTACGATTGCAGAGGGTCCT
ASHG19A3L0002024	356.987	1051.03	8.38878	10.1188	noncoding	DB340248	lincRNA-KCNK9-1	lincRNA	555	chr8	+	140120891	140121447		ATCTTGTCTGACTTTGATTCCATTCCTTTTATGTCAATCATGGGGCACATTACCTTTCAT
ASHG19A3A050618	1211.27	787.001	10.1575	9.70864	noncoding	NR_026862	PPP1R3E	RefSeq_NR	4521	chr14	-	23765112	23772057		ATAGTGAGGGCTCACATTTACTTAACACTTGTGTGCGCAAATCTGGGTTTTTCTTCCTTT
ASHG19A3A042349	290.476	285.342	8.09956	8.2424	noncoding	AK022980		misc_RNA	2377	chr10	-	1099687	1102063		CTTGGATAGTACACTATAGTGTTATAAGCTGTTTGACATGTCGCTTCCTAAATTCTCAAG
ASHG19A3L0002317	118.617	81.1763	6.81195	6.41983	noncoding	chrX:55801375-55812875-	lincRNA-RRAGB-1	lincRNA	11501	chrX	-	55801375	55812875		AGCCCCTGCTAGACTCTGTTCCATAATGGTAAACCTGTATGATCACTTGATATTAACATT
ASHG19A3L0003161	245.554	193.778	7.85426	7.68089	noncoding	DW421906	lincRNA-SIAH3	lincRNA	296	chr13	-	46513574	46513854		GAGCATTAAGGTTTTGACTTCAAATCTTCTATCTTACACCAATACCTTCCTTCTTTCACA
ASHG19A3L0002484	144.266	160.02	7.08746	7.40746	noncoding	chr1:2952104-2969716+	lincRNA-PRDM16	lincRNA	17613	chr1	+	2952104	2969716		TTAACTTCAGGACACCAAGAACTGCCTCAGTTTACTTCTCTGTGTGGGTCTCTTTCACCA
ASHG19A3L0001234	22222.4	14992.1	14.3602	13.9357	noncoding	AK294389	lincRNA-RNF103	lincRNA	1135	chr2	-	86732790	86948245	NM_016079,NM_001005753,	CTCTGTTGTGAGGACTACCATTTTGGAGAAGGTTCTGTTTGTCTCTTTTCATTCTCTGCC
ASHG19A3A051571	2091.8	1670.89	10.938	10.7907	noncoding	AK090477		misc_RNA	4801	chr14	+	71927902	71939072		GTAGCAAACCCTGTTTTGGTCAGTAGGACTTGTTGTAATTGCGTAATTAAAATGTTATGT
ASHG19A3A039588	71.8513	100.464	6.08731	6.72469	noncoding	uc004cuh.2	AY660577	UCSC_knowngene	823	chrX	-	10981491	11125110		CAGGTTGGATTAGCTCAAACATGTACTTTCTTCTCAGTACTCCATATTGCTTTTCTTATT
ASHG19A3A042611	89570.3	82951.6	16.4758	16.3357	noncoding	ENST00000468834	RP11-462L8.2	Ensembl	793	chr10	-	33346542	33347335	ENST00000396608,	AAGTCTGTGGCTCGCATCGCCAAGCTTGAAAAGGCAAAGGCTAAATAACTTGCCACTAAA
ASHG19A3L0001063	106.735	67.7308	6.6658	6.16131	noncoding	chr2:134460980-134475605-	lincRNA-NCKAP5-2	lincRNA	14626	chr2	-	134460980	134475605		AGCTCAAAGTAGAAGTTCCCTTTTTCTGTGCGTAAGGAAACACCCCACTGATGAATTCAT
ASHG19A3L0001811	208.667	157.021	7.62154	7.37907	noncoding	chr6:48505291-48527891-	lincRNA-C6orf138-3	lincRNA	22601	chr6	-	48505291	48527891		GGAAACCTTCCCTATTCTTATAATAACTACTAATGCTGGACAAGTAGTCATCTATAGTGA
ASHG19A3L0002506	158.873	202.98	7.23135	7.75037	noncoding	BG210085	lincRNA-PBX1-1	lincRNA	282	chr1	+	163369198	163369747		CTAGGGTTCCCTGGTTTTCCTTACAAAGAATAATAATTCTGTTCTGTCCTCTCCAAAAAA
ASHG19A3A048829	141.289	92.7731	7.05867	6.60755	noncoding	ENST00000309884	RP4-575N6.3	Ensembl	492	chr1	-	101736430	101736924		AACAGCCAGTCCTTGGGCCTCATCTTTTTCAAGCTGTTTGCAGACAAATTTCCAAAAACA
ASHG19A3L0002807	908.367	849.636	9.73797	9.81992	noncoding	AW387651	lincRNA-TFE3	lincRNA	232	chrX	-	48903267	49031062		AAAGAGGCACGTAGCCGATTAGGCCCAGTACCCCTCCTCTTTCTTCTTTTGTATTTCCTC
ASHG19A3L0001776	385.674	464.897	8.50214	8.95644	noncoding	chr6:27248371-27266346-	lincRNA-PRSS16	lincRNA	17976	chr6	-	27248371	27266346		TTTTCTTGTGGTAATTTTCTGCCTCCCAAGAGATGGAGATCACAGAGCCTTCTGCTGTTG
ASHG19A3L0002472	223.05	238.896	7.71697	7.98217	noncoding	BF950033	lincRNA-ARID1A	lincRNA	283	chr1	+	26948061	26948325		AATTTAAGCAACCTTAGAAAACCAGCGCCTAAACCTTTCCTCTTAGGACCCTCAAGCTTT
ASHG19A3A032217	768.573	752.395	9.49859	9.64563	noncoding	AK021558		misc_RNA	1746	chr6	+	151713535	151715281		TCTACTAAGTCTCATTGTGGAAAAGCCACAAATGTCCCTAGTACAGTAATAAGGAAAAAA
ASHG19A3L0001259	378.07	203.914	8.47429	7.75739	noncoding	exon2436+	lincRNA-PTPN1-2	lincRNA	264	chr20	+	49047223	49047486		GCAAGGGATTTTCATCAAGAGGAATCTCTAACCTCAGCCCATCCCTGCAACTCACCCCTG
ASHG19A3A040421	765.378	138.614	9.49259	7.19736	noncoding	uc004exm.2	BC007360	UCSC_knowngene	646	chrX	-	133678458	133680653		TTGCAGTGTGCCTAGATTTTCCTCCAAGGACAAAAATGTGAATAAAGCAATATTTTAGCC
ASHG19A3L0001720	211.941	228.436	7.64686	7.91678	noncoding	AK307796	lincRNA-ARHGAP18-2	lincRNA	1320	chr6	-	129929164	130182692	NM_033515,	ATCCCTGGAGCTGCCATTAGAATCAAGAATCTTTGCCAAGAACTAGAAGCAAAGTTTTAT
ASHG19A3A030635	103.899	73.0652	6.62609	6.26916	noncoding	uc003qje.1	AK057490	UCSC_knowngene	1900	chr6	-	143287560	143358719		TGTACTTCAGCAGGAGCAACCAGATGAATTGGCTTCTCTATATCCCCGTATTAGCCACAA
ASHG19A3L0003419	93.051	88.0783	6.46607	6.53139	noncoding	AK309134	lincRNA-KATNAL2	lincRNA	1246	chr18	+	44497556	44624853		TCTTGATTGTGCCTTCACTAGATCAACATTTTTCCAAAAGCAGTCTGCCACAGCTTGAAA
ASHG19A3L0001205	278.356	178.853	8.03675	7.56823	noncoding	CN289466	lincRNA-MEIS1-1	lincRNA	784	chr2	-	67618829	67619611		ATAGAGATTCCAAATTTCTAACACTTTCTATAAATCCCCTTCCAGCTCAGATTGTTCCTT
ASHG19A3L0002704	406.152	507.302	8.57361	9.08334	noncoding	BG210561	lincRNA-AGRP-2	lincRNA	697	chr16	-	67551608	67552290		AAAGAACTCATCTAGACTTTTCTTGTACCTCTGCTCCCCAAACAGCTTCTCTTTTCAGGT
ASHG19A3A017790	128.288	154.026	6.92436	7.35108	noncoding	ENST00000441214	RP11-290F20.2	Ensembl	2250	chr20	-	48927247	48937879		GTTCACTTGCTCACTGTCCATCCAATGGAAAATGGCATCTCCTTCACAAATCATGGCCAA
ASHG19A3A009611	275.375	126.515	8.02215	7.06788	noncoding	NR_026905	C17orf69	RefSeq_NR	2477	chr17	+	43716340	43719669		GCTGTTCTGTAGGCACTTTGAGAAGAGGAAGAGTAGCATCTCGGTTTTAATAAAAGAAAG
ASHG19A3L0003092	104.774	93.9448	6.63878	6.62676	noncoding	BP360743	lincRNA-GPR98	lincRNA	582	chr5	+	89825160	89918488		ACTTTTATTTTTCACTTAACATTACAGCTTCCCTCAATCGCAGTGAGTGAGCCCAAGGGC
ASHG19A3L0001712	164.54	156.039	7.27992	7.37085	noncoding	AA935188	lincRNA-MCM9	lincRNA	178	chr6	+	119110701	119110864		TTCTGATTGATGTGAATCCTCCTCACTGCACGTCTCCTCATTCTTACTGATTTGGCCAAG
ASHG19A3A017849	955.714	536.03	9.81141	9.16172	noncoding	NR_002785	GNASAS	RefSeq_NR	1158	chr20	-	57393973	57425958		TTTCTGCACATGTCCATTAGAATTGGAGATGGGGCGTATCTAGTGTTGAATAAAGGCCCG
ASHG19A3L0001100	231.319	300.369	7.76793	8.32095	noncoding	AA326780	lincRNA-GRB14	lincRNA	285	chr2	-	165513256	165513539		ATATCTCAGTAACAGCTTGATAGGACATTGTCACTAGCAGTGCCACCACTAGGTCCTTAC
ASHG19A3L0001705	126.532	110.025	6.90413	6.85986	noncoding	AA938966	lincRNA-FYN-1	lincRNA	408	chr6	-	112303900	112304307		CCTCCCTGGCCAAGTCCTGTGTAAACCAAGTAATGATCAGGCAAGAAGAGATCCAAAAAA
ASHG19A3A021809	4782.68	2405.46	12.1482	11.3193	noncoding	ENST00000464731	RP11-451G4.4	Ensembl	381	chr3	-	155027215	155027596	NM_002568,	CTTCGCAAAAGTCGAGTGGGCAACATATTCATTAAAAATCTGGACAAATCCATTGATAAT
ASHG19A3A048071	111.416	96.8924	6.72587	6.66969	noncoding	uc001dnu.1	AK022898	UCSC_knowngene	2786	chr1	-	91295103	91317175		CAGCGAAGCTAGATTGTATAATTTATTAGTTTTCTCCACCTGGTAACACATCCTTAAGAA
ASHG19A3L0003223	340.655	350.278	8.32219	8.54288	noncoding	BQ446739	lincRNA-NPPC	lincRNA	522	chr2	+	232742949	232743639		TTTGTTGTAATTCTCCTTCCAGGTTTCCTACTTTAGAAAATATACTCCGGGCTGGCCGGG
ASHG19A3L0001486	145.167	99.8319	7.09661	6.7157	noncoding	BC036795	lincRNA-ZNF732-2	lincRNA	2220	chr4	-	300246	467911		CTTCCTGTGGACCCATCATTCCTTGTTTACTGTCTGATATTTAAAAGGAAGAGGAACCCC
ASHG19A3A038325	49770	58470.2	15.567	15.8581	noncoding	ENST00000412020	RP11-12D24.8	Ensembl	244	chr9	+	5312025	5312269	NM_020810,	AGCCTTGTGGTATGGAAAAACAAATTCGTTTTATGTCTTCTTCTCCCTTTCCATCTTTCA
ASHG19A3A044525	9591.11	9317.89	13.1572	13.2578	noncoding	ENST00000400856	RP11-106M7.2	Ensembl	499	chr10	+	116569133	116570929		CTAGTGACCCAGTGTTGCGAAGACCTATTTCTCCCCCCAAGACATTCTTTACCAGATATT
ASHG19A3A018942	128.921	104.451	6.93071	6.78348	noncoding	ENST00000450205	AP001046.4	Ensembl	699	chr21	-	44742296	44751919		ATCCTGGGTCTTGCTGTCTGGAGAGAGGAGGAAGCCGGCCACACTCTCCAAGAACATTCA
ASHG19A3A053924	332.857	257.332	8.29059	8.0915	noncoding	AK125450		misc_RNA	2509	chr16	-	74347908	74350416		TAGATTAGCCATTTGCTGAAGGTTAACTGGGAAAAGAAGGATGGAGGAAGGCTATACCGG
ASHG19A3A014658	215.333	72.4347	7.66799	6.25768	noncoding	AK022462		misc_RNA	1784	chr2	-	175921561	175923345		ATAATATGGCCCGTCAAGTGTAGCCACAAGAGGAGACACACAGAAAGGATGGGGGTGGGT
ASHG19A3L0002871	1217.45	624.52	10.166	9.37471	noncoding	CR603409	lincRNA-FAM156A	lincRNA	1248	chrX	-	52976959	52993397	uc004drj.2,NM_014138,NM_001099684,ENST00000375489,	AGCAAAATAATGTTTCAGAGGCTGCTCAAGCAGTGGTTAGAGGAAAACTGAGACGTGCAC
ASHG19A3A043568	4059.96	3317.74	11.9085	11.7692	noncoding	ENST00000445427	RP11-5N23.2	Ensembl	1133	chr10	+	6622380	6626261		GCTCCCGCCCCTGGCCTCCTTACCAGCCACTTGTCGCCCAGCTGCGAACTGGAGCGGGAG
ASHG19A3L0001168	692.162	661.931	9.34543	9.46116	noncoding	chr2:237543636-237554786+	lincRNA-COPS8-1	lincRNA	11151	chr2	+	237543636	237554786		ATTAAATACATTCCTTCCGTCTGCCTTCCCATCTATCATGGTGGAACATTGCAGGGATGG
ASHG19A3A014747	238.112	211.145	7.80949	7.80779	noncoding	AK026734		misc_RNA	2218	chr2	-	187219300	187221500		TGCACCTTGCCTCATTAAAAGAAGAAAAAATGCCCCACTATATTCACTCACAGAATTTTA
ASHG19A3L0002164	6862.31	9273.8	12.6621	13.2508	noncoding	CR594623	lincRNA-TP53INP1-1	lincRNA	1606	chr8	+	95908039	96060801		GTAATATATGACATTGCCAGTCAAGCACACTTGCACCTAAAGCATGTAAGTCGGCTTTTT
ASHG19A3L0003427	651.899	630.176	9.25643	9.3892	noncoding	chr18:68717578-68723320+	lincRNA-CBLN2-3	lincRNA	5743	chr18	+	68717578	68723320		CTCTTGGCTAGACTTTACATGATAGCTTATTTTGCCCTTTCCCTCTTGTAAAGATGATTC
ASHG19A3A018562	23506.9	29792.3	14.4416	14.919	noncoding	ENST00000438350	RP11-40H20.3	Ensembl	221	chr1	+	27537754	27537975		GTATTAGATGATGCAGAAGGGATTCATTCTAAAACAAAGTCAAGAAAACAACTGGGTTGA
ASHG19A3A051112	1549.23	1582.95	10.51	10.7138	noncoding	NR_003138	SNHG10	RefSeq_NR	1972	chr14	-	95999252	96001209	AK097876,	GATTGCTCATTTTCTAATGTGGGACCTGAAATTTACCAGGTGCTTAAAGAATCTTTTTGT
ASHG19A3L0001872	157.929	98.488	7.22285	6.69409	noncoding	DB482133	lincRNA-LUZP6-3	lincRNA	482	chr7	+	135459273	135459755		AGAAAGATAACTCTCGTTGTTCTCTGTCTTGACGTCTCTGGGCTTTCAAATTGTGGCTTA
ASHG19A3L0001337	7670.36	10546	12.8274	13.4396	noncoding	AK299287	lincRNA-COLQ	lincRNA	1840	chr3	-	15529724	15643076		ACAAATAAACCTTCTCTTATCAACATCATGATTGAGCCACAAGCCACACGGAAGGCCCAG
ASHG19A3A042590	1040.69	1016.87	9.94036	10.0759	noncoding	NR_024284	LOC220930	RefSeq_NR	2232	chr10	-	31605457	31608024		GTCCTTAGGAACAGATAAAGTCATGGATATGAAAGTGATCACTGTCATTAATATCCACAT
ASHG19A3A027346	160.572	199.206	7.24621	7.72204	noncoding	ENST00000499346	CTC-228N24.3	Ensembl	1380	chr5	-	127276117	127418792	uc003kuo.2,	ATGCAGTGGGTGTCTACACACTTCTGATGACACCTTTATTTTAAAAGCTGATGTTCCAAG
ASHG19A3L0000469	82.6899	83.2903	6.29133	6.45377	noncoding	BU657491	lincRNA-CACNA1C	lincRNA	581	chr12	-	2870365	2879621		AAAGGCATTTGGAAAAAACACCCTAAAGCTGTTATATGCTCCGCATCCCATTGCCTCCCT
ASHG19A3L0002364	132.65	157.305	6.96995	7.38157	noncoding	BF724558	lincRNA-MCL1	lincRNA	428	chr1	+	150544341	150545215		CAAATTTCCACATACTTCACATAGATAACACTGTAACAACTTTGAAACTAAGAGGGAGAG
ASHG19A3L0002134	7807.58	9133.37	12.8525	13.2307	noncoding	CR616931	lincRNA-HEY1	lincRNA	728	chr8	-	80830952	80942384		TGGTGGGGATAGTATACACTGTACTAAGAAATTGTCATTCAATAAATACGTTTTGAGTGC
ASHG19A3A041413	1305.79	1644.01	10.2614	10.772	noncoding	ENST00000448271	RP11-111F16.2	Ensembl	287	chrX	+	110862035	110862322		ATTTATTTTGGTCCAATGCAGTCCCATTCTTTATGGCCTATAGTCTCACTCCCAACTACC
ASHG19A3A049083	98.1613	117.34	6.54662	6.95496	noncoding	AK055084		misc_RNA	2696	chr12	+	117018780	117021477		CGTTCCCTGCTCTCTGCTCCCCAAAGACACTTGATGGAGCAGAAAATAAAATGGATTAAA
ASHG19A3L0002884	200.314	283.332	7.55941	8.23372	noncoding	chrX:11801246-11812911+	lincRNA-FRMPD4	lincRNA	11666	chrX	+	11801246	11812911		AATGGATGTTTCCTTTGTATTAACCTTTCATTTTGTGATGTGTTCCTCCACTCCTGAGCA
ASHG19A3L0001723	155.866	169.452	7.20151	7.48887	noncoding	BX477169	lincRNA-TMEM200A-2	lincRNA	470	chr6	+	130573952	130592448		ACATTCTCAGTCTATATTGGGTATCTGCTCTCCTGAAGAATCTTTGCTTTTTGAGGAATA
ASHG19A3L0001459	84.4495	111.239	6.32111	6.87604	noncoding	BG188549	lincRNA-PDE5A-2	lincRNA	499	chr4	-	120927096	120927593		CCTAATCCCATGCATCTATGTTTGAGAAAATATTCCCACATGATTTTCTATCTTCCCATT
ASHG19A3A050100	7412.95	6153.68	12.7752	12.6673	noncoding	uc001uyq.1	AK054970	UCSC_knowngene	3681	chr13	+	42813345	42817026		CATCTTTCCCAAAGGGCACTGCCTTGAGATCATCCTTCTCAAATAAAAAGAATGCATTTG
ASHG19A3L0002904	151.043	115.804	7.15701	6.93477	noncoding	AV648429	lincRNA-IGF1	lincRNA	688	chr12	+	102601068	102601808		TTCTTGTGACTGTTGGCATTCACTGGCTTTGTGTAAGCATCTCTGCTCTGGCTTCAATGA
ASHG19A3A051364	126488	99560.3	16.9659	16.5915	noncoding	ENST00000479812	RP11-434O22.2	Ensembl	475	chr14	+	35163375	35163850	ENST00000446445,	TGTTTGACTGGCTCCTGATTACGATGTTTTGGATGTTGCCAAAAAATTGGTATCATCTAA
ASHG19A3A025726	12331	12450.2	13.516	13.6748	noncoding	ENST00000506460	RP11-452C8.1	Ensembl	741	chr4	+	80584914	80617991		TACGTTTCCCAGCTACTCCATCTCCCCACACCGCAGGCTTTCTGTTATGTTCTGATGATG
ASHG19A3A014134	1547.92	1714.03	10.5087	10.8321	noncoding	ENST00000447876	AC018730.1	Ensembl	607	chr2	-	105424030	105469641		AGCGGAGCCGTGCGATGTATTTGAAAAGCAATCAGTCCGACCTTCCCCCATAGATTCATC
ASHG19A3L0002352	253.988	220.101	7.9065	7.86694	noncoding	BM807096	lincRNA-GRIA2-2	lincRNA	1041	chr4	-	158967911	158968773		TTTAACCCCCCATTTTGTTTAAAAAGATTTAAAGGGCCAAACCAATTTGCCCCCTTTTTG
ASHG19A3A047087	1619.41	1645.54	10.5744	10.7734	noncoding	ENST00000423187	RP11-99H8.1	Ensembl	432	chr1	-	71181615	71185972		GGCTCTTCCTCCTGCTCCTGTCACCACAACAACTAGTGTGTGGAGCACAACTAGCCTGAC
ASHG19A3L0003087	84.9453	76.2747	6.32917	6.33402	noncoding	chr5:1777673-1784347-	lincRNA-LPCAT1-1	lincRNA	6675	chr5	-	1777673	1784347		AACAGAAGCCTTCTTTCGGGAGAAACAAATAAATGCAGGAAATTGGCTGTCCCCAGCTGA
ASHG19A3L0000311	1719.42	2017.2	10.6639	11.068	noncoding	exon848+	lincRNA-ZW10	lincRNA	153	chr11	+	113592424	113592576		TCTCTCCCCAACACCACCCATCCCCCATGTGGCTACCAGGTTTCCTTCCTAAACAGGTCA
ASHG19A3A021412	5455.49	3705.26	12.3356	11.9355	noncoding	AK126393		misc_RNA	2855	chr3	-	112316367	112319222		AAAGATGCTGACACTTGTATTAATTCATTAAAAAACACCACCCCCTCCCTGAAATAAACT
ASHG19A3A008877	111.574	122.562	6.72878	7.02159	noncoding	NR_026857	FLJ90757	RefSeq_NR	4421	chr17	-	79002932	79008519		CGCAGGACGCCGCGGGCCGGGCTTACAGGTGGGAGAGGCCCCGACCCCGCCGCTTCGCAG
ASHG19A3L0002770	445.318	425.8	8.70651	8.82944	noncoding	chr15:64339447-64344761+	lincRNA-FAM96A	lincRNA	5315	chr15	+	64339447	64344761		ATGATGGATATTTACATTTAGTTTTGCTGCCCAGTTTCCAATCCCTGCTTCCTATCTGGG
ASHG19A3L0000479	137.613	135.167	7.02049	7.1604	noncoding	chr12:32192533-32208358+	lincRNA-BICD1-2	lincRNA	15826	chr12	+	32192533	32208358		TCGTTGGCCCTCACTCTAGACAACCCTATGATGATCTTTGCCACTGCATGAAAGTGAAAT
ASHG19A3A040420	750.04	777.637	9.45987	9.6943	noncoding	NR_024607	MGC16121	RefSeq_NR	786	chrX	-	133677407	133680660		TTTCTTGAAGGCATCCAGCATCTCCAGTTAGCAGTACTGATTTTTTTTCCCCCCAACAAA
ASHG19A3A000296	164.676	205.498	7.28101	7.7689	noncoding	ENST00000446527	RP11-421L21.3	Ensembl	1045	chr1	+	101491474	101552727		TTAAACACCCGCTTCCTAAGCCTGGGTTCTTATGCCTTTGTTTGAAAAACATGGTTCCCT
ASHG19A3L0003144	80.803	87.4034	6.25712	6.52092	noncoding	AA584758	lincRNA-LGALS3-1	lincRNA	411	chr14	+	55588450	55588861		TTCTTTCTTGAATACCAGTACATCTCCAGGAATCAGTTACCCAGCTCTGACTTTTCCTTT
ASHG19A3A050356	275.653	276.289	8.02352	8.19667	noncoding	ENST00000438536	RP11-427O13.1	Ensembl	1800	chr13	+	85095859	85098050		ACTGTACCTGCCCAGAAAGGCCTAATTATGCTCCACTTTTTCTCTTTCCTTATTCCATTT
ASHG19A3A043449	206.982	220.169	7.6095	7.86749	noncoding	ENST00000456581	RP11-500G10.1	Ensembl	2843	chr10	-	131864637	131909081		GGGCAAAAGGTCTAAAGAGCAATTTCTAAAGGTTCCTTTGTGTCTAAGATTCTGGGTCTT
ASHG19A3A031348	3046.23	2041.5	11.4887	11.0859	noncoding	uc003oci.1	AK057104	UCSC_knowngene	3143	chr6	+	32862499	32871535		TGTATATAGTATGGTTCTGGATGCTCTTGTATACCTCACTCTTCATTTCTCACCTAACCC
ASHG19A3L0000632	13377	11985.5	13.6378	13.6149	noncoding	AK316271	lincRNA-SUCLA2-1	lincRNA	1801	chr13	-	48517468	48612125	NM_003850,	TGAAATTTCAGTTGCCAATATGATCTGAAAACCCAGTGGATGGCTGAAGGTGTTAAATGT
ASHG19A3L0000787	101.1	72.2251	6.58871	6.25338	noncoding	BF516116	lincRNA-TTC8	lincRNA	513	chr14	-	89591214	89647088		AGCTCCGCATGAATGGAAAGACCTCTTTATGCTTCTGTTATTTTCTTCCATAAAAGTAGA
ASHG19A3A033119	2821.72	2897.78	11.3727	11.5808	noncoding	NR_015381	TP53TG1	RefSeq_NR	751	chr7	-	86954665	86974808	ENST00000359941,	CTCTGGGATAGATGCAGGAAGCGATGGTTAAGACCCATTTTCACCCAACTTCTCGCCGCA
ASHG19A3L0000512	1938.35	1962.94	10.8319	11.0338	noncoding	BQ222987	lincRNA-SLC16A7-7	lincRNA	921	chr12	-	60408665	60409569		TTGGTAACAGGGTTCTTCTCAACTTCCTCCCTTAATATTCATCTGAGCCCCCAACTTATT
ASHG19A3A054559	126.357	91.5163	6.90222	6.58646	noncoding	AK123174		misc_RNA	1951	chr16	+	49370953	49372904		TACCATCATTAGCAGTGTGCTTGTCCTCTGCTGCTTCCAAAAAGAATAAACTTCAAATGA
ASHG19A3A048512	159.763	126.056	7.23918	7.06186	noncoding	ENST00000442418	RP11-86H7.1	Ensembl	748	chr1	-	95104016	95285652		AAATTGTGGCCTGCCATGAAGTTGTGAGAGAAAAGCATCCCTCATTTCTTCAGGAAAGGC
ASHG19A3L0000986	602.448	723.192	9.13964	9.5867	noncoding	AA483651	lincRNA-CD226-2	lincRNA	347	chr18	-	67666095	67666442		AACTGCCTGCTTTTCTGCTCTCTCTGTCTTTGCACGTTTCCTTTAGGAAGTTACCTCATG
ASHG19A3A012089	713.105	726.966	9.38832	9.59413	noncoding	ENST00000505358	AC004611.1	Ensembl	1207	chr19	+	5558184	5581226		ATTTGCATACTGTTTGTTAAATGTCAAAACACCCTGAAAATGCTTTCTCCCACCTCCACC
ASHG19A3A046957	107.334	101.17	6.67511	6.73477	noncoding	ENST00000504610	AP002841.2	Ensembl	2746	chr11	+	112141474	112233257		TCAACACTACTCTCCCAGCATCTCTTATTGAGAGAGCTTGTGAAGAAGTCAGCTGGCAAA
ASHG19A3L0001946	95.6769	94.124	6.50805	6.62927	noncoding	AI024083	lincRNA-GRHL2	lincRNA	344	chr8	+	102289100	102289444		TGTAGACACAGAATGTTTGACAGGAAGACTGATGAAGTAGCAGCCCCTTCTGCGTAACTT
ASHG19A3A021257	80.841	74.5561	6.25794	6.29871	noncoding	ENST00000478745	RP11-654C22.2	Ensembl	866	chr3	-	72553956	72599703		CACATTAAAAGGAGAAACGGACGCTGATCAGGGAGGAAAAGACCCTGCCCGAGGACCCTG
ASHG19A3L0002463	80.1418	76.5884	6.2458	6.3406	noncoding	AW300693	lincRNA-PTP4A2-2	lincRNA	506	chr1	-	32304415	32697204		GAGATTTGGAATCAAAAGAAGTATATTCAAGTCCTGGCCCAATGTGACCTGAACTGACTT
ASHG19A3L0001994	3560.31	4308.4	11.7234	12.1484	noncoding	AA451649	lincRNA-ZNF572-2	lincRNA	438	chr8	+	125814588	125815026		TTGTTGGTGCCCGGATCAATTCTTAAGCTGTCCTCCCCATCCTGCCCACCAAAGCTCAAG
ASHG19A3L0001358	111.542	84.3846	6.7281	6.47331	noncoding	chr3:187039181-187056506+	lincRNA-RTP4	lincRNA	17326	chr3	+	187039181	187056506		TTTCCTCAATGTGTCTCATTCCCTGAGTGCTGCTCAGAGTTGTAGGCATCCTGAATTACA
ASHG19A3L0000484	91.1672	92.5024	6.43472	6.60278	noncoding	chr12:38442633-38454033+	lincRNA-ALG10B-2	lincRNA	11401	chr12	+	38442633	38454033		ACCAAGTGTATCTACTCAGATGTAAATCCCAAGGCCTTAGGCTGTCCTCTGTTTTCCTCA
ASHG19A3L0003432	281.835	177.596	8.05438	7.55908	noncoding	chr9:81993205-81999034-	lincRNA-PSAT1-1	lincRNA	5830	chr9	-	81993205	81999034		TACAAAGAGGGCTCTCCTTACCCTACCAAATGCAGATCTTTTGTGAAGAGAAATGGTCAG
ASHG19A3L0000232	135.132	126.389	6.99496	7.0657	noncoding	chr10:21548369-21563069+	lincRNA-C10orf114	lincRNA	14701	chr10	+	21548369	21563069		AGGGTTCTCAGCTTATCTCTATACACAGATAATTTACCCTTGACCTTTCCTTACCAACAC
ASHG19A3A022574	1298.58	1448.11	10.2538	10.5877	noncoding	uc003cqw.1	AK096853	UCSC_knowngene	2353	chr3	+	47205986	47285546	NR_033373,	TAGAAAATCTGTTTCTTCCTCTTTCCTCCTCCTTGCAACGAGTATGGCTCAGGGAACTGA
ASHG19A3A050268	548.155	491.056	9.00168	9.03878	noncoding	ENST00000442229	RP11-248N6.1	Ensembl	888	chr13	+	68476486	68477374	uc010fdz.2,NR_002185,ENST00000422682,ENST00000412208,	GTCGAATCTCATGATCTGTTCCATCCTTTTTCTTGTGTGGGTAAGAAAGGGCAACCACAT
ASHG19A3A051786	635.285	716.504	9.21465	9.57219	noncoding	BC036602		RNAdb	1336	chr14	+	101319252	101320560		AATTCTGTCTCTTGACATTGTCATTTGCATGCTCCCCACACACAAATCCTTTCCTGGTGA
ASHG19A3L0002454	140.337	239.445	7.04932	7.98453	noncoding	DB224754	lincRNA-RRAGC-4	lincRNA	566	chr1	+	39028316	39028882		ATGGCGCGTCAAGGTCCATCCATTCCTTTGCAGCATAATCTACACATCATTCAAGTGCAT
ASHG19A3L0002584	231.205	240.9	7.76722	7.99381	noncoding	chr3:13556998-13571393+	lincRNA-FBLN2-1	lincRNA	14396	chr3	+	13556998	13571393		TATCCTCTGGCTTTTTCCACCGATATCTGGACATTTCCCTAAATCCCACATGTTCCCTTC
ASHG19A3L0002936	206.942	130.458	7.60904	7.11052	noncoding	CA430002	lincRNA-HMGA2-3	lincRNA	688	chr12	+	65860615	66035978		TTCGGTCTTGTTTCAACACACATGGCCTCTATTTCCAAGATCTCTTCATACCTCCAAATG
ASHG19A3A016946	437.058	163.989	8.67907	7.43971	noncoding	AK125369		NRED	3146	chr2	+	217081767	217084913		TGTGTCCTTTTATTCATGAATTCTTGCACATTATGAAGAAAGAGTCCATGTGGTCAGTGT
ASHG19A3A026811	114117	118282	16.8167	16.8326	noncoding	ENST00000455561	RP4-575N6.2	Ensembl	343	chr1	+	101721829	101722172	NM_001023,ENST00000473109,ENST00000466800,ENST00000462007,ENST00000457473,ENST00000451209,ENST00000443291,ENST00000412545,ENST00000402520,	CCTTCTGAGATTGTTAAGCAGGTTACTTCCATCAGTATTGAGCCAGGAGTTGAGGTGGAA
ASHG19A3A049570	104905	108107	16.6873	16.7114	noncoding	ENST00000445636	RP11-369L4.1	Ensembl	354	chr13	-	50935545	50935899		CGACGAAGAGAAAATCGTTGTGAAAGTGTTGAAGGCACAAGCACAGAGTCAGAAAGCTAA
ASHG19A3A013683	3614.97	1803.39	11.7468	10.9068	noncoding	ENST00000414613	AC010733.8	Ensembl	1231	chr2	-	61163953	61165184		AATTGGCGGAACTCCTCCTGCATTGAATTGTGCAACTCCTGGAGCTGAATTTACTCCAAA
ASHG19A3A019314	265.236	223.533	7.97062	7.88636	noncoding	ENST00000435702	AP001046.6	Ensembl	2816	chr21	+	44783211	44786446		TACTTACCTTGGACTTTAAGGGCCTCCTGCAGCCTTTGTCACACACTCTTCTTATTTTTT
ASHG19A3L0001590	101.657	104.947	6.59677	6.79035	noncoding	BF897862	lincRNA-RPS14-1	lincRNA	554	chr5	-	149870376	149870906		CACTTCCCATACATTGCCCTCAAATAAACAAATGCTCATTCGTCATGCACATTTTAAAAT
ASHG19A3A052656	196.254	154.693	7.53317	7.35731	noncoding	AF319524		RNAdb	2253	chr15	+	25227154	25266498	uc001yxc.2,	GTGAATGACCTGTTGCAGTGCTTTCATTGAAGTGTTCTTCGTTCCCTCAGCAATATGATT
ASHG19A3L0000640	126.337	102.51	6.90182	6.75549	noncoding	CN267256	lincRNA-KCNRG-1	lincRNA	606	chr13	-	51180256	51180827		ACCATTAGCCTCCTTTCTAGTAATATCAAAGGATGAATATCTGGGCCCTCTTTTTAATAT
ASHG19A3A017260	265.695	270.175	7.97259	8.16407	noncoding	ENST00000340424	RP4-673D20.1	Ensembl	1216	chr20	-	1645928	1688846		AGAACAGAAATGTGTCCCAGATAGAAACAGCCTCCATCCTCATTGAGAACATGGAAGGCA
ASHG19A3A024024	1350.77	732.572	10.3122	9.60575	noncoding	AK023737		misc_RNA	1747	chr4	-	24519052	24520048		ACCTACCCCTGCCTCTCAAATCTTGTTATAACAATTAAACAGTTCGTATTAAGACTTTGT
ASHG19A3L0001047	60.9825	68.2575	5.84618	6.17264	noncoding	exon2236-	lincRNA-INHBB-4	lincRNA	466	chr2	-	121156152	121156617		TGAAGGTCAAGAAGGCCACAGACGTGGCTTCAAGGAGCCCCTGCATGCTGGAGGAGGGGA
ASHG19A3A052797	21130.3	17726.1	14.285	14.1916	noncoding	ENST00000500949	AC012652.2	Ensembl	4265	chr15	+	41576202	41594168		TACTCCTGGCTTAAGTAGTTTAGTGCCTGGGAGAATCCATTACTGAAAAGCATTTAACTT
ASHG19A3L0001466	518.074	616.799	8.92101	9.35735	noncoding	chr4:12970502-12999702-	lincRNA-HS3ST1-8	lincRNA	29201	chr4	-	12970502	12999702		GCCCCCTTTCACATTTCTTCTTTGGCCATGATGGCGTCATATTCCTAATCAATATTGCAA
ASHG19A3L0000299	91.9334	69.9	6.44848	6.20665	noncoding	BC058549	lincRNA-PLCE1	lincRNA	737	chr10	+	95653757	95713998		TTGTGGATCAGGAAAGGTCCTAAACAAAGCACAGGGGAATGGCACTAATCTCACCAGTAA
ASHG19A3L0000136	211.344	200.052	7.64178	7.72943	noncoding	exon91-	lincRNA-DMBX1	lincRNA	175	chr1	-	46989750	46989924		TAATCTGGCAAGTCTTCCTGGAGCAGGTGGCATGTGGCTGGGCTCTGAAGAGTGAAGCCT
ASHG19A3A042723	273.344	240.639	8.01159	7.99216	noncoding	ENST00000422732	RP11-314P12.2	Ensembl	2444	chr10	-	47096453	47099716	uc001jef.2,	CCCCATATTCTTCATCTTGTTCCCTGGGATCTTTCTCCCTAATAAAGGAAAAGCTCATAG
ASHG19A3L0002028	81.6109	137.905	6.273	7.18951	noncoding	chr8:140508518-140524643+	lincRNA-KCNK9-3	lincRNA	16126	chr8	+	140508518	140524643		TAGCAGTTGTAAGAATAACCTGGTTAGTGGATCTGAGTGGACTCCCCAAGTGTTAGATGC
ASHG19A3A035389	184.107	230.664	7.44172	7.93366	noncoding	uc003wma.1	BC150495	UCSC_knowngene	1551	chr7	+	155174770	155189051		TTGCTCATAACTAGCATCTCAACACTTCATGATTGTCTCCCAGATACGGGTTGGGGTTGT
ASHG19A3A051142	83.0738	87.928	6.29752	6.52899	noncoding	ENST00000398460	AL117190.1	Ensembl	3381	chr14	-	101323581	101327355		GTAAAGCCATCACTCATGCTTTCAAGACAAATCCCAACATATGCCCATTCCCAGGGAAAG
ASHG19A3A027424	124.437	139.555	6.88032	7.20697	noncoding	uc003lak.2	BC045187	UCSC_knowngene	2159	chr5	-	134571924	134583867		ATCAGGGTTTATAAGGGCTCCCACTTCACTTTTTACCAAAAGAAAATATCTTTCCTTTGC
ASHG19A3A014535	200.43	249.199	7.5605	8.04581	noncoding	uc002uaw.2	DKFZp686H10114	UCSC_knowngene	2528	chr2	-	160549703	160568946		GTAAACTGGTGCTGAGCATTGAACATGGATAATACCAATTCCTAAAGACAGCACAAAAAA
ASHG19A3A029676	122.716	100.759	6.86141	6.72812	noncoding	ENST00000442852	XXbac-BPG27H4.8	Ensembl	799	chr6	-	30807302	30815936		AGAATTTCCTTGTAGACACTTTTCAGGCCTTTGTTTGCTGGAGACTGGAGTTCCCTGAGA
ASHG19A3A022076	271.594	191.731	8.00319	7.66567	noncoding	AF315716		misc_RNA	336	chr3	-	188868587	188868923		GAGAAATGTTATAACATCATCCCACCTGGCTTTATCCATTAACATCTGCTCATCTCTGCC
ASHG19A3A026019	185.114	171.503	7.44931	7.50578	noncoding	ENST00000501498	AC108062.1	Ensembl	2882	chr4	+	129431492	129436412		CTTTGAAGTTCTGCAGTTGCATTATATTGTGGCTTGCTTTGGATTTGTTACATTTAAGCT
ASHG19A3L0001341	91.3966	95.1959	6.43922	6.64494	noncoding	BE551891	lincRNA-ANKRD28-2	lincRNA	539	chr3	-	16177780	16179034		GATGAAGGATTTGATTTCAACTGATGAGTCATCACTGTGTGTGTGTTTTTTACCACTTAG
ASHG19A3A049492	40521.6	24316.7	15.2561	14.6362	noncoding	ENST00000454403	RP11-396A22.4	Ensembl	411	chr13	-	41958908	41959319	NM_178014,HIT000301757,	TTAACGTGCAGAACAAGAACAGCAGCTACTTTGTGGAATGGATCCCCAACAACGTCAAGA
ASHG19A3L0000359	107.386	70.3546	6.67577	6.21589	noncoding	exon679-	lincRNA-METT5D1-4	lincRNA	241	chr11	-	29338577	29338817		TAGCTCTTTGTTGACCAGTTCATCTTCCCAGGCTAATGACCTATTTCATTACTTTTGAAG
ASHG19A3L0000740	198.686	177.222	7.5474	7.5562	noncoding	chr14:59616072-59635747-	lincRNA-DACT1	lincRNA	19676	chr14	-	59616072	59635747		GCTGTTCCTCATCAGTTCCTCTGACCTTGGTCTTTTCTATTGTTCATTGAAAGTGCAGCT
ASHG19A3A031975	311.732	221.583	8.19749	7.87455	noncoding	uc003pwf.2	BC042098	UCSC_knowngene	2007	chr6	+	114290864	114661893		AGCCTGCCAACTCCTGATTTTGTCATTACCCTCAGAACTCCAGAATGTAAGCTCCATGAA
ASHG19A3L0002814	3957.59	5189.31	11.8727	12.4246	noncoding	AA101261	lincRNA-BCOR-3	lincRNA	381	chrX	+	39558459	39646279		TACTTTATTGATGGTACATGACAAGGTGCGGCTCCCTAGGCCCCTCCCCTCTTCAAGGGG
ASHG19A3A019641	115.951	129.419	6.78042	7.10001	noncoding	ENST00000440255	RP1-213J1P__B.1	Ensembl	819	chr22	-	28072555	28110959		ATTTCTCCTTTCCAAGCATCTCTCATGGAAGGCATCTTGGATGAAAAGACCTTTGGCAGC
ASHG19A3A030188	160.066	75.1023	7.24268	6.30933	noncoding	ENST00000457116	RP5-991C6.4	Ensembl	471	chr6	-	82434438	82446070		CCGTTCTATCCCATTCCCTGGACCAAATGTTTGCAATATATAACACTTCTTTAAACTTTA
ASHG19A3L0000774	423.172	393.946	8.63156	8.71359	noncoding	BI020545	lincRNA-C14orf4-1	lincRNA	164	chr14	+	77464961	77465128		AACAGGCTGCCTCCTCACCCAAGAAAAGACCCTGCACAACCAACCTGTGAGTGCTCTGGA
ASHG19A3A051410	772.21	698.788	9.50437	9.53753	noncoding	ENST00000494283	RP11-58E21.1	Ensembl	713	chr14	+	50519574	50520287		GATTAGTCTCCATCCCATCAGTTTGGTTTTATTGACCTGATGACTGAAGCTGGCATCATG
ASHG19A3A015154	173.964	67.1367	7.35857	6.14731	noncoding	uc002vwf.1	AK056246	UCSC_knowngene	2341	chr2	-	237968076	237994460		ATATTTGTGTTTTACATCCCTCACTAGACCCCCAGGAAAGAGGCTTTGATGTGTTGCCTG
ASHG19A3A008476	351.275	296.167	8.365	8.2976	noncoding	BC065911		NRED	2987	chr17	-	45125430	45128397		AGTTCTGAGTCTTCCATTGGTCCGTATCCCATTCTATCTCAGATGCCTTTACTTCCTGCT
ASHG19A3L0001860	400.867	352.459	8.55562	8.55286	noncoding	chr7:127179214-127190764+	lincRNA-GCC1	lincRNA	11551	chr7	+	127179214	127190764		TTTTGTGCTGCAGTCCAATTTGATGTGTCAAAATTCTGTCTTTCATCTGCCCTTCTACAA
ASHG19A3A025590	1459.77	1419.72	10.4277	10.5578	noncoding	ENST00000508720	RP11-584P21.4	Ensembl	297	chr4	+	68312001	68312298		ATATAATTACGTTGCTATGGACACGAGTTTCCAGCTGTGGTTGCAAAACCCATTGGAGAA
ASHG19A3A049568	96.5989	116.126	6.5231	6.93924	noncoding	uc001vdo.1	BCMSUN	UCSC_knowngene	3068	chr13	-	50556687	50699677		ACATCAATATGCAATAATGGTGGCCAAAGGAGCCTGCACCCATCCGTTTTTACAAACCCA
ASHG19A3A052658	111.478	124.643	6.72742	7.04522	noncoding	AL832758		NRED	5277	chr15	+	25295778	25365039		ACCTGGAGGCTGCAGACCATCGTGGCCCTTTGCAGTGTTCGGAAACATATGCGCACCCCA
ASHG19A3L0000813	395.487	344.648	8.53777	8.51965	noncoding	CA412304	lincRNA-COPS2	lincRNA	754	chr15	+	49393961	49395461		ATTTAGTATCTGGATGTATCTACGCTGCTACCCCAACTCTGCTCAGTGTTTTTCCTTCAC
ASHG19A3A051640	85346.8	72037.9	16.3888	16.1543	noncoding	ENST00000488511	RP11-7F17.1	Ensembl	344	chr14	+	77435025	77435489		ATCAAGGCCCTCATTAAAGCAGCTGGTGTAAATGTTGAACCTTTTCGGCCTGGCTTGTTT
ASHG19A3A049577	1674.87	1341.29	10.6251	10.4751	noncoding	ENST00000399168	RP11-457D13.1	Ensembl	635	chr13	-	51735858	51736493		AGTGCCTAACGATTCCCTGGTTATGGTTCTGAAATCAAGGAGCTTAATGCTGAAATGCAT
ASHG19A3L0001931	192.988	199.602	7.50881	7.72578	noncoding	CR608597	lincRNA-ZNF117	lincRNA	1837	chr7	-	64440300	64467062		AGCACTTTATGTCATTGGAGACAGAAACCAGTGTCCGCCAAAGCACCTAATAAAGCCAGA
ASHG19A3L0000990	89.3253	89.5629	6.40518	6.55586	noncoding	chr18:68422120-68432320-	lincRNA-SOCS6-2	lincRNA	10201	chr18	-	68422120	68432320		TTTGATGGAAGATACACCAAAGACGTGCTCTTCAATCTTGTTGGGGTTTCCCCATCGATA
ASHG19A3A015140	1076.79	982.377	9.98762	10.0241	noncoding	uc002vvl.1	AX748264	UCSC_knowngene	1811	chr2	-	235361542	235363353		ATAAAATAAAGAAAGCAGATCTCGGCCAGACACAATGGCACATGCCTGTAATCCTAGCAG
ASHG19A3L0002669	134.696	69.5451	6.99042	6.19906	noncoding	DB349013	lincRNA-DCTD	lincRNA	546	chr4	+	183802911	183803457		TGTTTTTATTTTGTTTGGTTTTAAACACAAAGAGCCCGTGCTGGCTGCTGGCTCGAGCCT
ASHG19A3L0001043	233.568	236.433	7.78139	7.96698	noncoding	DB335899	lincRNA-TMEM177	lincRNA	513	chr2	-	120461545	120481191		AATTTGAATCTGGTGTCAACACTCCTTTCGGCTGCATTCCACTGCATTGCATGTGCATTG
ASHG19A3A050797	184.383	190.485	7.44443	7.65522	noncoding	ENST00000444462	RP11-423O2.3	Ensembl	288	chr1	-	142790232	142790520	ENST00000510932,ENST00000445742,	AATTCTTTCTAGTAGCCATCACATTTCCCCATTTGAGTTAGAATTCGCCCTACTACTACC
ASHG19A3L0002582	239.035	238.758	7.81547	7.98121	noncoding	chr3:126825067-126831976+	lincRNA-TPRA1-3	lincRNA	6910	chr3	+	126825067	126831976		GGACAGTGACCATCCTCCAACCTCCATGACTCTTAAAAGAGGCATGTCCAATACTTAATT
ASHG19A3L0000071	103.816	167.756	6.62511	7.47494	noncoding	DA530362	lincRNA-PROX1-3	lincRNA	608	chr1	+	213460781	213461394		TTCATTAGCACTGCTAAATGAACCAGAGTGCTCCTGTTAGCACCTATTCTCTCCGCACTA
ASHG19A3L0002726	152.912	116.463	7.17518	6.94371	noncoding	chr11:128286813-128298538-	lincRNA-KIRREL3-3	lincRNA	11726	chr11	-	128286813	128298538		AAGAAGTTATTTAGGTGTTGGAGGGAAACCTTTCTTTCCACCCTGTGTTTGTATTTCATT
ASHG19A3L0001251	117.737	95.1402	6.8022	6.64389	noncoding	chr20:38843986-38912961-	lincRNA-DHX35	lincRNA	68976	chr20	-	38843986	38912961		GTGGGCTATGGGCCTTGTTCTCCTGCATTCTAGTTGGGGAAGAGAAAAATAAATGAAATG
ASHG19A3A039749	250.627	367.9	7.88727	8.61939	noncoding	ENST00000431646	RP11-157D23.1	Ensembl	880	chrX	-	39226538	39251028		AAAGATCTTCAAACCTGGAAGGCTTGCTTCAAACCCCAGCTCTACTCCAACTACAGGATT
ASHG19A3A009462	189.321	110.551	7.47997	6.86613	noncoding	AK024617		misc_RNA	1862	chr17	+	37710439	37712286		TATAGAAGTAGTATTGTGAGGGGGATCTTGGGTCTTCCAGGCCAGGTGTAAGCAAATGTA
ASHG19A3L0000231	85.0274	87.8325	6.33006	6.5273	noncoding	DB068425	lincRNA-NEBL-1	lincRNA	536	chr10	-	21250680	21661879	NM_001173484,	GCCTGAAGCAGCAAAGTGAATTGCAGAGTCAGGTCAAGTACAAAAGAGATTTTGAAGAAA
ASHG19A3A033394	66.3812	100.828	5.9746	6.72891	noncoding	NR_024412	LOC401397	RefSeq_NR	1143	chr7	-	112756773	112758637		ACTTAGGTTGCACCAGTGTATTTGTAAAACAGGAGCAAATTTGGACCTTGCCGGGCCAAA
ASHG19A3A052577	220.973	154.152	7.70498	7.35262	noncoding	uc010bol.1	AK307134	UCSC_knowngene	2009	chr15	-	96812000	96870577		GATCAGAGCAATCAATCTTGGGCAGCACTTTTACAGTGTAATTGCTGCAACATAACAAAT
ASHG19A3A007982	177.019	114.213	7.38385	6.9148	noncoding	uc001gix.1	AK127238	UCSC_knowngene	5619	chr1	-	173204198	173446294		TGTCAGAGGAAGTGGCTTTCTTATTGCAGCAAAAATTCCCGTACCAATGTCAGTGCTAGG
ASHG19A3A014675	1641.95	1622.75	10.5931	10.7508	noncoding	uc002ukz.1	LOC375295	UCSC_knowngene	1156	chr2	-	177494567	177502659		CTGTGATTGGCATCCCCATCATGCTGTAACTGACACAAAATAAACTTAGGGTAATTGCCG
ASHG19A3L0001485	76.6957	79.6451	6.18106	6.39296	noncoding	chr4:27048002-27104452+	lincRNA-PCDH7-2	lincRNA	56451	chr4	+	27048002	27104452		TTCTCTCACATTGTTGTCTGTGACATCTACAAATTATTTAGCACGCCTCCTATAAAAAGG
ASHG19A3L0000142	134.863	90.8808	6.99208	6.57578	noncoding	exon92+	lincRNA-KNCN	lincRNA	197	chr1	+	46992321	46992517		GGATGGCAGAAATTAAGTTGGTCAGTGTGCCCTGGGGAGGGACTATGCTGTCCTTTGCCC
ASHG19A3L0001721	103.096	80.6837	6.61538	6.41059	noncoding	AW510921	lincRNA-C6orf191	lincRNA	509	chr6	+	130092388	130092897		AATAAGTATCACTTCTTGTGACTTCTGCATTTCTGTCTAACCAGTCACCCTGTTTTAATT
ASHG19A3A051792	774.752	1040.75	9.50971	10.1059	noncoding	uc001yjz.1	AK094562	UCSC_knowngene	2638	chr14	+	101536247	101539271		AGGATTCAGAGAACCCCCAAATGTCAGGGCTGCTCCCTTCTTGTCCTGCCTCTCTGCTCA
ASHG19A3A031188	692.892	363.318	9.34773	8.60107	noncoding	ENST00000416785	RPSAP2	Ensembl	888	chr6	+	28699793	28700681		ATTGAAAAAGAAAAGCAAGCTGCTGCTGAAAAGGCTGTGACCAACGAGGAATTTCAGGGT
ASHG19A3A024696	1642.27	1987.59	10.5936	11.0505	noncoding	ENST00000417698	AC096732.1	Ensembl	477	chr4	-	124666904	124667381		AATAATCAGAAAGAGAAGGAAGCCAAAGAGAAAACTACCTGGGTTCAACTGAAGCGCCAG
ASHG19A3L0002957	104.424	81.0858	6.63289	6.41842	noncoding	chr17:8905860-8924601+	lincRNA-NTN1	lincRNA	18742	chr17	+	8905860	8924601		AAGATGACCAAAGGATGCTGTCACTGTCCTCAGTCTTTTTATTGGGGCGATGGAGAATGA
ASHG19A3L0001119	306.859	327.685	8.1753	8.44605	noncoding	AU252893	lincRNA-TMEM194B	lincRNA	700	chr2	-	191483583	191484249		ATGACACAATAATGCAATCACAAGAGTACGTTAAAAGTTAGGCCGGGTGCTGTGGCTCAC
ASHG19A3A040404	391.174	416.173	8.521	8.79533	noncoding	ENST00000394346	RP11-512H23.2	Ensembl	511	chrX	-	130929684	130930195		AGAACTTCGTGCCCATTGACTTGGACGAGTGGTGGGCGCAGCACTTCCTGGCTAGAATCA
ASHG19A3L0002912	34921.4	33989.2	15.0423	15.1005	noncoding	U29607	lincRNA-ELK3	lincRNA	2569	chr12	+	95867932	96712956	NM_006838,	TTCTGCACCTATACCCTCTGGTGTTGCTTTTTAACCTTCCTGGAATCCATTTTCTAAAAA
ASHG19A3L0001126	129.689	85.2422	6.93916	6.48682	noncoding	DB027866	lincRNA-SDPR-2	lincRNA	595	chr2	+	192557927	192573896		GTAGACTCAAGTTAATGTGAGTTATGTGATGCCTGTCTGTCATTGGATGAAGATCTACAC
ASHG19A3A021364	380.147	373.419	8.48172	8.63751	noncoding	ENST00000466108	MT-ND4	Ensembl	1367	chr3	-	106613198	106614565		AATATTAATACACCTAGCACTGCTTCTCCTATTATCCTTAAACCCCCAAATCATTTGGGG
ASHG19A3L0003458	2968.09	4656.46	11.4449	12.2647	noncoding	AA136769	lincRNA-INSIG2-2	lincRNA	356	chr2	-	118984269	118984617		TCTCCCTCCATCCTCTGAAACAAAAACTAATTTGTTGTTCCCTCCCGGATTGCATGGCTG
ASHG19A3L0002883	2013.83	1903.45	10.8861	10.9883	noncoding	chrX:11801246-11812911-	lincRNA-MSL3	lincRNA	11666	chrX	-	11801246	11812911		GCAAAAATGCCCCTGCCCCGTTTTCAATACTTCTCTTTTTTCTGAAACAAATCCTTCTTT
ASHG19A3L0001112	202.681	144.657	7.57955	7.2585	noncoding	BQ695043	lincRNA-FRZB	lincRNA	726	chr2	-	183786672	183787397		ATGCTCTCTTTCTTCGAAGATTGCCATGACCTTGCCTTTGGGAAAAAATATTTTGAGATT
ASHG19A3A034480	94.6371	73.7848	6.49213	6.28291	noncoding	ENST00000448776	GS1-124K5.10	Ensembl	712	chr7	+	65976542	66010053		TCCCAGAACCTGGAGAGGATTCTTGCCATGGCCAACAAGATCACGTTCACAGTCACCAGG
ASHG19A3L0002961	162.482	199.236	7.26219	7.72242	noncoding	CD050812	lincRNA-PELP1	lincRNA	1033	chr17	+	4481674	4701447		GCGCACAAGTATCCCTTATAATACATTATATCTCCTCAGGGTATCTCATCACACAGTCTG
ASHG19A3A055191	210.502	112.039	7.6357	6.88639	noncoding	uc003enb.1	CR593374	UCSC_knowngene	3495	chr3	+	129612714	129627754		TGAGTACTCTTAAGCAATCCCCGTGGACCAAATCAACTGCCAATTTGGATATCATCGAGG
ASHG19A3A051745	321.23	226.941	8.24129	7.90817	noncoding	uc001yfe.2	BC016484	UCSC_knowngene	3144	chr14	+	96343152	96391899		GGGCTGCGGCTCTGCTGCGTGCCCCGCGCGCCCCTCAACCGCCTCCGGATGCGCTTCTCG
ASHG19A3L0002968	73.3453	85.0271	6.11716	6.48343	noncoding	chr2:202788106-202795396-	lincRNA-CDK15-2	lincRNA	7291	chr2	-	202788106	202795396		TAGGTCTTCTGGTCATGATGAACGTCTCACTTGGTCTTTTCTTCTCTGTATTGCTGTGGG
ASHG19A3L0001115	99.612	114.545	6.5693	6.91913	noncoding	chr2:18787244-18801494+	lincRNA-OSR1-5	lincRNA	14251	chr2	+	18787244	18801494		AACAAGAATGTGCTCGCTCTCCTGTTTTACATTGTACCAGATGTGTCTGCAGCTAGAAGG
ASHG19A3A049290	135.3	74.0819	6.99659	6.28889	noncoding	ENST00000434601	RP11-101P17.9	Ensembl	1179	chr13	-	21877650	21922860		ATCTGAACTGCAGAATATCAATTTCCAGACATTCTTCCTAGATGATGCCGTCTGCCACGG
ASHG19A3A015010	164.303	241.407	7.27797	7.99731	noncoding	uc002vje.1	BC038542	UCSC_knowngene	1008	chr2	-	219765535	219795358		AATGACACTCCAGGAACAATGACACTCCAGAAACAATGACACTCCAGGAACAATGACACT
ASHG19A3L0001856	110.014	86.6917	6.70779	6.5099	noncoding	chr7:125224214-125321514+	lincRNA-GRM8-1	lincRNA	97301	chr7	+	125224214	125321514		CCTCCAATATACATTTCTACATGTTTGCTCTCCACTTGTCAGTGAAATGTGAAGTGACTA
ASHG19A3A023910	123.972	260.975	6.8754	8.11303	noncoding	ENST00000504402	RP11-367J11.3	Ensembl	292	chr4	-	7096297	7105056		GCCTCAGCCAAGTGAAATGGGAATCAGGACCATTACAAAGAAATTCAATTAAAATAAAAG
ASHG19A3L0001073	75.6567	93.0401	6.16172	6.61272	noncoding	chr2:142935555-142951705-	lincRNA-LRP1B-2	lincRNA	16151	chr2	-	142935555	142951705		GAGGCTGCAGTGTCCAGGTCACTTGTATTAAATTAAAGCAAAAACAATCTTAATTTAGTC
ASHG19A3L0000749	140.658	167.022	7.05223	7.46909	noncoding	chr14:66260097-66320947-	lincRNA-FUT8-1	lincRNA	60851	chr14	-	66260097	66320947		ATCTGAGTATTTACTGCCCTTCCAAGGGAGAGCGGATACTCTTTTCCCCATTGATTTGGA
ASHG19A3A021213	6162.07	6261.36	12.505	12.6882	noncoding	AK026861		misc_RNA	1334	chr3	-	62953695	62955011		GTGTTGGGAACTTATAGCAAAATGAACTGCCATTCTCTGCTCTTATAAGTAGCAATAAAT
ASHG19A3A035935	418.898	233.558	8.61341	7.95032	noncoding	uc003yed.2	CR590356	UCSC_knowngene	1430	chr8	-	90729655	90769797	ENST00000504145,	TGCTTCTTTGAGACTGAGGTTATATTCCACTTCTTCTGACTACACCACCACCATCAATCT
ASHG19A3L0001686	1308.13	1209.88	10.2635	10.3276	noncoding	AW452601	lincRNA-MTX3	lincRNA	524	chr5	-	79307192	79307717		AGCTGAACAAATCAGAGAATGATTTTCCTTCCCTCTTGTGATTGCTCCCCAGTATCCCTT
ASHG19A3A044949	439.003	447.805	8.68587	8.90547	noncoding	uc001mkl.1	AK001432	UCSC_knowngene	1558	chr11	-	13001081	13011095		AAGGGAAGGCTGCTGCCTCTCACTTCTCCCTGTTTTGTTGTTCTTTTAAGTAGCATGTGT
ASHG19A3A033629	616.245	159.943	9.16977	7.40649	noncoding	AK124257		misc_RNA	2362	chr7	-	140423814	140426175		GCTGGCACACATTGCCTTCTTTCTCATTGGGTCCAGCAATGAAGATAAGTGTTTGGGTTT
ASHG19A3A048115	458.252	183.042	8.74738	7.59964	noncoding	ENST00000428029	AC084018.1	Ensembl	895	chr12	-	122233674	122240839		AAAGTGGACACTGAGGTCTGAGGCTTTTGAGGACAGTCAGGAGCCCTCCTATGGGCTCCA
ASHG19A3A044016	419.133	398.531	8.6142	8.7303	noncoding	ENST00000444770	RP11-170M17.1	Ensembl	794	chr10	+	65424423	65750328		ATCTGTACTTGGCTTTCCTGGGTCACATGTAGATGAAGTACCGATCTCTTCTCCTTCTTG
ASHG19A3L0000601	341.759	383.85	8.32599	8.67677	noncoding	chr13:25650975-25663125+	lincRNA-PABPC3	lincRNA	12151	chr13	+	25650975	25663125		CAAAATAACTGACGTTGGCACAATTCATAGCACCCTTCCTCTGAAAATCCAGATTGATCC
ASHG19A3A034084	2085.28	1394.47	10.9327	10.5311	noncoding	ENST00000340195	AC004079.4	Ensembl	672	chr7	+	27063356	27064528		TGAAATGCAACAAAGAGGAGAACCTCTGTACACAAAGGATGCTGTACCAGACTCTGCTTG
ASHG19A3A033072	585.174	693.742	9.09652	9.52771	noncoding	ENST00000440088	AC090421.1	Ensembl	2029	chr7	-	77286976	77325582		TTGCTGTGCTAAAGTGTTCAGGTGTGAAGTGTACTCATGTTTGCAAATCACTTTGAAATA
ASHG19A3L0002590	878.649	885.993	9.6882	9.87405	noncoding	AI828001	lincRNA-SHQ1-4	lincRNA	349	chr3	+	72610333	72631361		AATATGTTAACAATGATTGTCTCTGGGAGGGTCTGATTGCTGGTCTCTCTCCTCTCTGCT
ASHG19A3A007451	84.7512	123.832	6.32524	7.03598	noncoding	NR_026973	LOC285830	RefSeq_NR	698	chr6	-	29694377	29716826		TTTGCACCCCAGGGAGCTGCTGCTGATGGTGCCAAGAACGAAGAAGGAAGCTCCTGCCCC
ASHG19A3A042589	216.137	191.458	7.67279	7.66348	noncoding	ENST00000450834	RP11-192P3.1	Ensembl	564	chr10	-	31596657	31607964		CCAACTGAGTTATTCAATAAAGCCTGCCTTGTTGAATCTGTTTTCCCATGTATAGTTTAT
ASHG19A3L0002515	3089.44	2921.12	11.512	11.5927	noncoding	AF191495	lincRNA-F11R	lincRNA	2187	chr1	-	160967605	161008711	NM_016946,	GCATAGTAAATTTTCAGAGAACTTGAAGCCAAAAGGATTTAAAACCGCTGCTCTAAAGAA
ASHG19A3A024547	189.6	194.453	7.48181	7.68508	noncoding	ENST00000512915	RP11-499E18.1	Ensembl	546	chr4	-	103339873	103371167		TAATGAGTAAACTCACACAGCTGCAACAAATGCTGCCACCTCCTGGCATCTTTTAAAAAG
ASHG19A3A042377	38178.2	41123.4	15.1739	15.3662	noncoding	ENST00000451325	RP11-445P17.5	Ensembl	435	chr10	-	5346393	5346828		ATCCTTGCATGGAAAGCCAAATCTCACCAAGTAGGAAAGGAAAAGGGCAAATACAAGGAG
ASHG19A3L0003137	5359.75	5979.12	12.3083	12.6298	noncoding	DB351988	lincRNA-RPS24-2	lincRNA	541	chr10	-	80321876	80322417		TTGATAATGATCATTTTCTTGGACTTGGAGCAATGCATTTCTCTCCTCCCACTCATTCTG
ASHG19A3L0002395	980.104	769.416	9.84996	9.67806	noncoding	BQ184470	lincRNA-EDEM3	lincRNA	542	chr1	+	184633040	184633560		TGTCCCTTCAAGGCCTCTTCCTCGTCCCAGGTCGAGTCTCCTCCTTGCTGACCAGGCATC
ASHG19A3L0002554	125.815	137.251	6.89556	7.18227	noncoding	AW879648	lincRNA-SLC37A3-2	lincRNA	366	chr7	+	139954781	139955675		CTCTGGAAGGGCCTGGAGAAACCATGGAATTTATGTTCTTTGGGCTCCCTTTTTGTCGGG
ASHG19A3L0000620	1166.65	867.904	10.1056	9.84864	noncoding	DA687098	lincRNA-TRPC4-2	lincRNA	544	chr13	-	38764994	38924385	NM_022457,NM_001001740,	TACTGCTCATTTTGAAGACTTGGAGCAGTGTTACTTTTCTACAAGGATGTCTCGTATCTC
ASHG19A3A055155	1868.85	1367.53	10.7812	10.5052	noncoding	uc002qsa.2	LOC113386	UCSC_knowngene	1396	chr19	+	58816739	58827011		acgggagagtctgccggcggagaatataaggagatggacaaaccgtgtgggtgccctcca
ASHG19A3L0000496	105.896	154.214	6.65462	7.35305	noncoding	AA128631	lincRNA-ADAMTS20	lincRNA	448	chr12	+	43633465	43633911		CCTTGACTCTAGAAAATGCTTCTCTATTTTCTCCCATTGGAAATACTTGATCCTTAAAGA
ASHG19A3L0002166	8031.01	11463.9	12.8976	13.5565	noncoding	AY444560	lincRNA-C8orf38-2	lincRNA	1110	chr8	+	95970235	96070177	NM_152416,	CGAGTGGATTTTGATATATTCCACCCATCTTTACAGCAGAAGAATACATTACTTCCATTA
ASHG19A3L0002423	142.879	196.635	7.0738	7.70214	noncoding	chr9:33081447-33083405-	lincRNA-SMU1	lincRNA	1959	chr9	-	33081447	33083405		GTTAGACATTTGGAGGCTAGGTTTACAATGGTAGTTTTTCTGTGACTGTCCTGCCCTCTG
ASHG19A3L0001362	3532.78	3460.93	11.7122	11.832	noncoding	BX641108	lincRNA-TPRG1-2	lincRNA	3994	chr3	+	188604480	188944604	NM_001167672,NM_001167671,	CTGAATAACGTTCCCTGACTTAGGGAAAGGCACACAAAAACATATAAAGAATATGTCTAT
ASHG19A3L0000812	500.169	262.876	8.86909	8.12361	noncoding	BG942219	lincRNA-SECISBP2L	lincRNA	316	chr15	-	49398530	49398839		CTTTATTTTGGATTTTCATTTGCCTTTTTTTTAATATTGGCACTTAGCTATGTGTAATCC
ASHG19A3L0000879	74.0193	72.5656	6.13021	6.26007	noncoding	AA054316	lincRNA-FA2H-1	lincRNA	470	chr16	-	74823174	74823629		AGACCAGAAGGAAAATATGCTAAACTGTGAGTTGCCGGTTGCCTCCTGGTCAGAGAAATT
ASHG19A3A010800	362.336	473.941	8.41251	8.98281	noncoding	BC034527		misc_RNA	1077	chr1	-	211713915	211714910		TGTAAAGGATCCCTCCCACTGCTGAGCAAGAAGGTGGGAAATGGGAGAGCAGCTCTCGGA
ASHG19A3L0001480	145.291	134.655	7.09802	7.15439	noncoding	AV731436	lincRNA-ANAPC4	lincRNA	666	chr4	-	25453082	25453469		TTTAACACATTCTCTCATCACACACCCCAATACCAATTTACCTTTTCAAACCAACTATCA
ASHG19A3A041187	6101.06	3456.32	12.4921	11.8298	noncoding	AV714079		RNAdb	721	chrX	+	73164173	73167168	uc004ebo.2,ENST00000415215,	CCTAACCCTTGGGAGAAGGCAAAACACTTGATGAAATCTACATAAAGACTAAAACATTTT
ASHG19A3L0001402	317.763	256.454	8.22463	8.0872	noncoding	BM699739	lincRNA-FHIT-1	lincRNA	246	chr3	+	59542105	59542351		AGTGTCTTCCATAGTTTGGCATTAAGAATTGCTGCCTGCCTGTCTAAAGTCTTAAAAATA
ASHG19A3L0000833	95.0516	107.588	6.49803	6.82882	noncoding	chr15:77989870-78011295+	lincRNA-TBC1D2B-1	lincRNA	21426	chr15	+	77989870	78011295		ATCTTCCTCAACCAGGTGGTAGGGCGAGAAGAAGCTCCTAACCTTATTTCCTCATTTCTA
ASHG19A3A025301	793.293	877.954	9.54351	9.86209	noncoding	ENST00000503532	RP11-341G5.1	Ensembl	582	chr4	+	13821733	13978699		GGAGAATTGAAGAAATCTTAAAATGCAAGCATATTAAGCCCTTTTCCCCCAAATCACTTA
ASHG19A3A047149	184.328	137.993	7.44377	7.19104	noncoding	G43210		misc_RNA	283	chr11	+	130736198	130736481		TGAGTTACCCAATCAAGCCCTTTTACCTCCTTAAGATGGCAGATTAGAAGACCCTCTTCC
ASHG19A3A038984	94.4489	104.078	6.48828	6.77835	noncoding	ENST00000432783	RP11-569G13.2	Ensembl	1577	chr9	+	98857492	98864194		TCTCCTATCTCAAGCCATCCTTCAACTTATAGGGACTTTGCACATAGTTGCTGCAGGTTG
ASHG19A3A027847	64.8012	87.7276	5.93942	6.52531	noncoding	ENST00000412512	RP5-1003J2.4	Ensembl	221	chr1	+	110825155	110825722		AGGAAGCACTGTGCTCCCACTGAAGTGACCTGTGAACACCACTCTGCTCTGCAGGCATGT
ASHG19A3A014738	117.445	175.573	6.79916	7.54133	noncoding	ENST00000414888	AC080125.1	Ensembl	684	chr2	-	186411861	186412545	NM_201999,NM_006874,ENST00000404600,	CCTTCAGCTATTACCCTTCCTGTAACTATGAAAACAGAAGGACTAGTGACATGTGAGAAA
ASHG19A3A052578	155.888	104.368	7.20162	6.78237	noncoding	AK307134		NRED	840	chr15	-	96813169	96870577	uc010bol.1,	TTCTTCAGGATTTAAAATTAATTGGCTCTGGCTTGGTTGGACCGTACTCGGATCTCGCCA
ASHG19A3L0001970	247.928	235.389	7.86899	7.96098	noncoding	EF565096	lincRNA-CSMD3-1	lincRNA	324	chr8	-	115307955	115308253		TATATAGTATTCAAACAGAATCTTGATATCGGAACAGTCTCCCTAAGCAAGGGCGAATTC
ASHG19A3L0001198	195.376	282.218	7.52596	8.22764	noncoding	BE669623	lincRNA-CCDC85A-1	lincRNA	540	chr2	-	57541455	58113368		CCAGGTTTATTGTAAAACCACTGATCCCTTCATTTGAGCTCGACTTCCCTGCACTTTTTT
ASHG19A3L0002817	136.242	130.148	7.00754	7.10792	noncoding	chr2:102572832-102577023-	lincRNA-MAP4K4	lincRNA	4192	chr2	-	102572832	102577023		AAGAAAGTTGCAAAGAAAGAACTCCCACAATGACAGCTGGGCCTACCCTTAACATTGCAG
ASHG19A3L0001930	447.961	388.912	8.71597	8.69579	noncoding	T50138	lincRNA-ZNF716-1	lincRNA	395	chr7	-	61751666	61787221		CATAAATCTAGTAGATCACTTACTTCCCCCTGGATGGCTCAGCAACATGTGGACAATTTT
ASHG19A3L0002261	251.297	344.142	7.89082	8.517	noncoding	BF509048	lincRNA-FAM9C-3	lincRNA	740	chrX	-	13062942	13158595		GATACCTTCATTCCTGGAGACCTGGTATCTTGTCCACTCCCGAGTCCTTGCTTCCTTCAC
ASHG19A3A014272	123.766	122.625	6.87321	7.02211	noncoding	ENST00000441053	AC067960.1	Ensembl	812	chr2	-	121839012	121846302		AATATCCCTTTCCCATTCAGCAACTGTGCAACACCTGACTTCAGAAACAGACGTCTAGAG
ASHG19A3L0003099	120.091	146.798	6.82828	7.28012	noncoding	BQ303919	lincRNA-RGNEF-3	lincRNA	549	chr5	-	72797022	73644097		CCTATTCCTATTCATCCTTTAAAATCTTATTCAAGTCATTACCTCCTGTTTGCCTTTCCT
ASHG19A3A030916	369.185	398.649	8.43749	8.73083	noncoding	AF210650		misc_RNA	1491	chr6	+	3982906	3984352		ATCACTGAACATTTAATCCCAGCAGTTCTCTTTTTTCAAACTTCTCCCGTTGATTTTGTG
ASHG19A3L0001061	158.022	125.847	7.2237	7.05959	noncoding	chr2:129541655-129552355-	lincRNA-HS6ST1-6	lincRNA	10701	chr2	-	129541655	129552355		ATCCCTTATCCATGGGCTCCATGCTGTGCCTCAGACAGGATGCTGAGTTTCACCCGCCAA
ASHG19A3L0000571	59.7206	88.08	5.81623	6.53142	noncoding	chr13:103635874-103659174-	lincRNA-ERCC5-1	lincRNA	23301	chr13	-	103635874	103659174		TAAAAGGAAACACGACTGCTTGAGGGCAATCCTCACATCCCCAGATGTTTTCTATTCAGG
ASHG19A3A055120	2560.23	2144.47	11.2327	11.1573	noncoding	uc001zyi.2	BX537481	UCSC_knowngene	2284	chr15	+	50647663	50650501		ACCGAACCTTCCCGCCTGTTCTGCGGGGCGTCTGGGCATGGCTTTCCCAACCTAGTAACT
ASHG19A3L0000003	191.523	168.334	7.49721	7.47978	noncoding	AA398121	lincRNA-VCAM1	lincRNA	338	chr1	+	101024655	101094481		TAAAAATATACCCCATCCTGATGCATTTCCATCACATGTGTTGTTAACAGTGTGTCCAGG
ASHG19A3A033759	148.202	161.061	7.129	7.41616	noncoding	ENST00000446220	RP11-10N16.3	Ensembl	2337	chr1	-	24620476	24648420		AGAATATGGTAGCTGACCCTTATGGAGCCTTATCCATCCCAGGCATTAATAGACACACAC
ASHG19A3A040461	254.458	227.644	7.90917	7.91187	noncoding	ENST00000426911	RP11-308D16.3	Ensembl	1221	chrX	-	136066581	136067864		AGAAGACGTTCATCAGCATCCTTGTCTGGGAATAGCTCATCATCCTCTTCATCTCATTCC
ASHG19A3A021633	345.979	299.893	8.34212	8.3186	noncoding	ENST00000466206	RP11-657O9.1	Ensembl	562	chr3	-	135074908	135158671		TGAAGTTTTCTGACTCTATCTTTCTTTTCCCGTGGCCACTGTTACCTCTCCAGAACAGAC
ASHG19A3L0003214	676.663	580.986	9.31014	9.27382	noncoding	chr8:129188666-129196194-	lincRNA-MYC-5	lincRNA	7529	chr8	-	129188666	129196194		ATTAAGAATGTGAATTAACTTCCTCCTTCTCTGGGCTTCTACTTGGCAGTCTGAGACAGA
ASHG19A3A032674	254.095	178.746	7.90717	7.56764	noncoding	ENST00000437235	AC007551.3	Ensembl	699	chr7	-	35794573	35840216		TATGTGGTACAAAGAACCAGTGAGTCCCATTTGTTGTGGTTCCTGCATTCGATGACTCCA
ASHG19A3A027790	403.029	268.554	8.56377	8.1544	noncoding	BC037953		misc_RNA	1378	chr5	-	179345911	179347229		GCCCTGTTCTCACTGACTGTGGAATATACGTTTGAAGTGAACACTTGCCATTTTTCCACG
ASHG19A3A000074	683.745	811.371	9.32695	9.75394	noncoding	ENST00000392478	AC015815.2	Ensembl	123	chr17	-	75085985	75087063		ctgcagtggcaccatcatgactcactgcagcctctccacctcctgggttcaagcgattct
ASHG19A3L0002451	91.9675	97.5498	6.44907	6.67902	noncoding	N62920	lincRNA-SLC2A1-1	lincRNA	572	chr1	-	43465118	43465841		TCACTTAGTGATTCATGCATATTCTTACACCAATGCCCCTTGGACTGGGTCAGTGTGAGT
ASHG19A3A013748	763.911	530.934	9.48915	9.14858	noncoding	ENST00000455212	AC007386.3	Ensembl	582	chr2	-	65187186	65187768		ATTATTCTTCCTGGTAAAAAAGTTCCCGTTTCTACCCAAAAGGCCAATACAAAGTTTTCA
ASHG19A3A029874	228.456	225.588	7.75081	7.89889	noncoding	uc003opf.1	BC132805	UCSC_knowngene	3122	chr6	-	40312083	40323745		AAGGACTCTGAAGGGGCCAGTTTCTCACACCTTTTAATCATCTTCCATTTCTCCAGGCAA
ASHG19A3L0001211	427.771	453.632	8.64804	8.92161	noncoding	chr2:68560571-68583471-	lincRNA-CNRIP1	lincRNA	22901	chr2	-	68560571	68583471		GTCTCATGACCTAACTCGTCTTTGTGGCTTCATCTTCTCTCTCTTTGAACATTTCATCCA
ASHG19A3L0001134	103.24	75.8813	6.61745	6.32566	noncoding	chr2:197823955-197835530+	lincRNA-ANKRD44	lincRNA	11576	chr2	+	197823955	197835530		TGGTTCTACTGAACAGTATTAACATAGCATTAAGTAGAATGATTGACTTACCCACCCCCC
ASHG19A3L0001940	617.83	895.773	9.1732	9.89108	noncoding	BC030956	lincRNA-TFPI2-2	lincRNA	1970	chr7	+	93220884	93540384		AATGAGTCATCCCTTTTTCCTTCCCCTTAAGGTTTCCAAATGTTGTGAAGAAGTAAGAGA
ASHG19A3L0003271	348.72	412.537	8.35333	8.78302	noncoding	chr8:49776604-49779322+	lincRNA-SNAI2-1	lincRNA	2719	chr8	+	49776604	49779322		AAGGTATTGTCTTGTGATCTCCTTTCCATCCTTGAGGCTTCGTAATTAAGCTCTGCGCTG
ASHG19A3A054022	165.701	144.918	7.28939	7.26062	noncoding	AL832093		RNAdb	3338	chr16	-	85176297	85179607		GTCCTGAATCTCCAGCCCAGAAATGTTGACCTTGACGTCAACCCTGCAGGCTCAAACAAT
ASHG19A3A025665	189.43	219.625	7.48091	7.86377	noncoding	ENST00000502790	RP11-692D12.1	Ensembl	685	chr4	+	74124925	74183670		ATATTTTAACCTGATCTGCCTGATTCTGGAGCCTGCACCATCATTCCATTGTCGTGCTTG
ASHG19A3A046276	95.7746	79.0092	6.50922	6.38121	noncoding	ENST00000421994	RP4-633H17.2	Ensembl	653	chr1	-	55838380	55839033		ATGCCCATTGTTCTTGAACTGGTACCTCTAAAATGCTTTGAAAATTGAGCAACGTCTATA
ASHG19A3A026164	2425.92	1968.35	11.1539	11.0369	noncoding	uc003imv.2	DKFZp434I0714	UCSC_knowngene	2999	chr4	+	153457415	153460414		CCATCACATCTACGTCAGTTTCTGTATAACATATACCTGGGAGTGTAATATGTATCATAA
ASHG19A3L0000935	92.4877	69.8205	6.45755	6.20526	noncoding	exon1962-	lincRNA-CTAGE1-2	lincRNA	113	chr18	-	20049287	20049399		ACTTCTCCACTTTTTTCTCAGTTATCATTATTACCATTACCAGGACTATCAAGTACAACC
ASHG19A3A036030	384.579	492.385	8.49833	9.04177	noncoding	AK001439		NRED	2742	chr8	-	104255772	104258560		TGGCCAAGAAGCAAATTCCTGTAGTTCCAAATCAGTAGCTCAAGTTCCTGGGTCAGACTA
ASHG19A3A042367	177.295	140.045	7.38642	7.21131	noncoding	NR_026743	tAKR	RefSeq_NR	1408	chr10	-	4913860	4958465		AGACCCCGGATCAGAAAATAAAAGTATCTAAACCTAGTTTTCTCTTGATTCCCGCCCCCA
ASHG19A3L0002932	269.681	229.543	7.99357	7.92481	noncoding	chr12:68307933-68321375+	lincRNA-IFNG-2	lincRNA	13443	chr12	+	68307933	68321375		ATTCTTACCAGCTTTGAAGACTTCGGGGAGGTGTGGTCTGTTTTTCCTTCTCTGGATTCT
ASHG19A3A020281	87.2697	97.701	6.36775	6.68242	noncoding	ENST00000422833	RP1-213J1P__B.2	Ensembl	115	chr22	+	28103577	28105929		TGATCGATTCTCCCTGAACAGCCTATTACGGAGGCACTGCAGATCAAGCCCGCCTGGAGA
ASHG19A3A015349	131.248	141.203	6.95569	7.22202	noncoding	ENST00000426539	AC130710.1	Ensembl	1096	chr2	+	16190548	16225923		TTTACTTAATGCAGGTTAACTTCATCAACCCTGGTGAAAATGCCACCTCCTCATGAGGAA
ASHG19A3L0001393	450.266	431.685	8.72328	8.8512	noncoding	chr3:45207146-45221396-	lincRNA-CDCP1	lincRNA	14251	chr3	-	45207146	45221396		TGATTTGCTATGGGAAATTTCTCTTCTGATCACCTACCTACTGCTTCCTGCCACCGTTAG
ASHG19A3L0001869	121.336	144.886	6.84336	7.26031	noncoding	BM716387	lincRNA-STRA8	lincRNA	437	chr7	-	135014903	135015340		TGAGGTGTCTATCATCTGTGTGGTCCACATTCTTCAGTTCACATATGTCCCCACTGAGAA
ASHG19A3L0002124	142.095	113.082	7.06628	6.90079	noncoding	CK126152	lincRNA-MSC	lincRNA	683	chr8	+	72587614	72614662		CTCTACATAATGAAAAAACATGATTATTGGGCACCTCTACCTAGCTCGAAAATTGGTTAT
ASHG19A3L0001530	694.911	589.195	9.35183	9.29501	noncoding	AK056959	lincRNA-C4orf26	lincRNA	1122	chr4	+	76439682	76472540		AACTATTTGCTGAGTGTCACTGTGCCAAGCCCTGGGGCTAAAACTAATCAAGATTTGGTT
ASHG19A3A028877	4586.35	3724.29	12.0902	11.944	noncoding	CR611332		misc_RNA	2122	chr5	+	139496842	139498964		GGAGTGGGAAGACTGCCTCCTTTTTTGAAGAGAGAGATTAAGGATTTTTATAATTGTTTT
ASHG19A3A051292	6558.14	5001.39	12.5966	12.3699	noncoding	AK057381		misc_RNA	1873	chr14	+	23763060	23764935		AGCAGATTGCTCACAAATTGACTGAAGGTAAAGCACCCAGGAAGCAACTGCCTACAAAAG
ASHG19A3A036393	141.72	154.667	7.06272	7.35704	noncoding	uc003wyp.1	CR613267	UCSC_knowngene	2275	chr8	+	17942376	17955126		GATAAGCAGTGAACAACAACAAAAAGACAAACTTCTTCCACCCTGAGGCGTATGTTCTCG
ASHG19A3L0002081	583.551	606.948	9.09221	9.33557	noncoding	CD172224	lincRNA-C8orf86	lincRNA	576	chr8	-	38512989	38513530		TCTCCCCACTCCACGTGGAAGAGGATCACTTTTGAGAAAGCTCCAAATATGAAATACACC
ASHG19A3A000186	1348.92	753.239	10.3099	9.64753	noncoding	ENST00000427361	AC020915.4	Ensembl	922	chr19	+	58816739	58826568		AGAGTCTGCCGGCGGAGAATATAAGGTGTGTGTGACCATGGAACGGGAGACCGGAGGGAT
ASHG19A3A051183	244.246	219.773	7.84639	7.86491	noncoding	AY927493		misc_RNA	130	chr14	-	105281910	105282241		GCGTCAGTCCGGGGGCGTACGCGAGCGATGGCTGTGACCGCTGAGGGAGAGGACCAGGCT
ASHG19A3L0000714	305.959	248.947	8.17041	8.04464	noncoding	BE837589	lincRNA-EGLN3-4	lincRNA	540	chr14	+	34355760	34356274		TGGGCTACACTGTTCCTGCTAACCTTCCTCTTATATATTTTGCCAGAACCACAAATATCG
ASHG19A3L0002951	180.531	84.0692	7.41065	6.46845	noncoding	BF109737	lincRNA-IL5	lincRNA	469	chr5	+	131755518	131915088		AGTCTGAGCTCTAAGTGTGCACAAATTGACCGAGAAATGATCAGTTCTCTTGGTGTTTCA
ASHG19A3A022109	57.8688	102.698	5.76942	6.7582	noncoding	ENST00000456816	RP11-513G11.1	Ensembl	796	chr3	-	194014253	194030493		GCATACTGTAGCCCTCTTTCTCATAGGGAGACTTGAGCAATAAATCATAATGAATGAGAA
ASHG19A3L0000589	584.682	618.952	9.09538	9.36267	noncoding	chr13:112169174-112181374-	lincRNA-C13orf16-3	lincRNA	12201	chr13	-	112169174	112181374		ATGAAAGCACAAAAGCCTTTGCCTTTTTTGCCTCATTCCTGTTGCTCCCCAGGAAAGAAG
ASHG19A3L0000374	127.183	107.738	6.91181	6.83077	noncoding	AW469566	lincRNA-C11orf74-3	lincRNA	360	chr11	-	37960181	37976213		AAACTTGGCTCATCCTTTGGTGTTTTCACTCAGTTTTTGTATTTAGGTATCCCTCTGATT
ASHG19A3A043335	84.8704	106.93	6.32748	6.81894	noncoding	ENST00000453491	RP11-539I5.1	Ensembl	657	chr10	-	118592511	118609212		GTGGGTGTAAAGCAAAGAACAAAATGAAGTGTGATTCAAGGTGGGAAATAGCCGCTTCAG
ASHG19A3A030937	149.442	66.7709	7.14187	6.13966	noncoding	ENST00000510466	AL136307.1	Ensembl	1357	chr6	+	5892672	5986353		CATATACTTTAGAACATCCATTCTGTGCAAAGCTCTGTGCCCACAGCTGTTGAGATGCCA
ASHG19A3L0000750	56.8051	103.243	5.74271	6.76664	noncoding	AI902766	lincRNA-GPHN-1	lincRNA	416	chr14	+	66313475	66313886		GGAGACTTGCTTCATATCACCAGCTTCTACTTTGTCCCCAGAGACATTTCTACTTCTACT
ASHG19A3L0003046	230.675	222.098	7.76411	7.8777	noncoding	CB857271	lincRNA-DLK1-1	lincRNA	349	chr14	-	101257085	101257400		TCATGTTTGTCCCCTCTAGGGCTATAGAAAACTGCAAATGATGGTTTCTTATTCTCAGCC
ASHG19A3A018558	97942.2	103110	16.5906	16.6465	noncoding	ENST00000449818	RP11-40H20.2	Ensembl	867	chr1	+	27533420	27534287	NM_199185,NM_013269,NM_002520,NM_001004419,ENST00000428039,	TTGTGAAGAATTGCTTCTGGATGACTGACCAAGAGGCTATTCAAGATCTCTGGCAGTGGA
ASHG19A3L0000577	345.031	316.558	8.33769	8.3964	noncoding	chr13:105757124-105768999-	lincRNA-SLC10A2-6	lincRNA	11876	chr13	-	105757124	105768999		CTCCCCTGATATTTGTAGGGTTTTGAGCTAGACGTTGTAATTGTGATTTCCTAATTTTAA
ASHG19A3L0001376	165.305	65.3821	7.28588	6.11017	noncoding	chr3:34626796-34644396-	lincRNA-PDCD6IP-2	lincRNA	17601	chr3	-	34626796	34644396		TTCTTTCTTAGTTGATGCTAATCCATGTGCCCATTCAAACTGAGCTAGACATCATGAATT
ASHG19A3A017624	21306.1	29152.4	14.2984	14.8866	noncoding	NR_027451	LOC647979	RefSeq_NR	5378	chr20	-	34633541	34638882		CACACAGGATCTAGAAGAATATGTCAAACTATAAACTGCTTGTGATTGTGAATGACTTTG
ASHG19A3L0003071	609.335	774.089	9.15576	9.68726	noncoding	chr6:13349175-13352025-	lincRNA-TBC1D7	lincRNA	2851	chr6	-	13349175	13352025		TGTGTTACGTAATCGGTTTTGCTTGGATTCTCAATCAGAGCTACCATCTTCCCCACCTGT
ASHG19A3L0000934	327.126	126.993	8.26829	7.07362	noncoding	exon1961-	lincRNA-CTAGE1-2	lincRNA	1130	chr18	-	20049159	20050288		TTCCTGAAGTGTGTGTGGGAGTTCTGTTGGTTTGGATGTCTGTGCTTTACAACCCGAATT
ASHG19A3A052465	983.662	474.979	9.85763	8.98653	noncoding	AK055989		misc_RNA	2012	chr15	-	82108948	82110962		TTTGGCCAAGCCTCGTGATCTAATTGGAAGTGTCAGTAGGATTGGACAGATAAGAATACA
ASHG19A3A031746	407.321	399.334	8.57677	8.73414	noncoding	ENST00000406279	RP11-551A13.1	Ensembl	553	chr6	+	78205835	78206388		CAGCTTACTAAGAAAAGTAAGGAAGAGGTTGTAGAATATGCTAAGCTTTTGGCCAAGTAA
ASHG19A3L0000506	143.726	82.0039	7.08204	6.43287	noncoding	BQ706775	lincRNA-KCNA5-2	lincRNA	963	chr12	-	5290181	5310943		AAAGTCTCTGGTGAAAGGGCTTCAAAATGACCCCTTTTGGTTTGAAGGCCCACCCTTAAT
ASHG19A3L0001267	317.621	331.475	8.22365	8.46269	noncoding	BF818610	lincRNA-PMEPA1-2	lincRNA	479	chr20	-	56700047	56700510		GGAACTTGCTTCAGAGCCTTTGCATGTCTTATTATCCCTTCCTAGAATGTTCTACCCTCC
ASHG19A3A032686	313.478	141.09	8.20532	7.22117	noncoding	ENST00000320802	AC009530.1	Ensembl	830	chr7	-	37625102	37625932		TGTCACCCTACCAGCCATTCCAAAATCTAACCATGGAGGCAGTGATGCAGATATCCTTTT
ASHG19A3L0001359	99.0784	126.337	6.56016	7.06516	noncoding	BG538918	lincRNA-BCL6-2	lincRNA	886	chr3	-	187576103	187576786		ATATAGAGGAATGACGAATCTGGTATTGGTGGCCAGAATTGTCACATTCCTCCCAGAATG
ASHG19A3A052669	129.009	133.276	6.93166	7.13944	noncoding	uc001zae.2	SNURF-SNRPN	UCSC_knowngene	4150	chr15	+	25481555	25620621	ENST00000453082,	GCTGCAGTGAATTTAACTGATCCTCTGTCCCTGCAACCGTTGTTTAAGGATGCTATTCTG
ASHG19A3L0002651	1112.19	1280.3	10.0342	10.4101	noncoding	chr8:37801630-37818621-	lincRNA-GOT1L1	lincRNA	16992	chr8	-	37801630	37818621		TGTAATGAATGATGCAGTGAACACTTGCTGACTGTCTTCCCAGAATTCCTTCTCCCCTCT
ASHG19A3L0002375	202.915	255.139	7.58126	8.07957	noncoding	EF363096	lincRNA-AMIGO1	lincRNA	672	chr1	-	109956133	110282926		TTCTGCACTTTCTCTATAAAACACTCACAGCTCCCTGGACTGCAGATCCATAGTGAGGAT
ASHG19A3L0001501	122.964	117.037	6.86442	6.95056	noncoding	chr4:53681743-53706918+	lincRNA-RASL11B	lincRNA	25176	chr4	+	53681743	53706918		AATAAAAAGATTGTTCCTTATCAGTCCCTACAGATTCAGCCAATCTTCTCACCAGCTGTA
ASHG19A3A035093	265.338	456.54	7.97117	8.92881	noncoding	uc003vrd.1	AK097607	UCSC_knowngene	1998	chr7	+	132333552	132413528		AAGATGAACTTCCAACCATTTGGATGAGCTCCAGGAGGTCATCTCTATCTCCCTGGAAAT
ASHG19A3L0001218	4149.18	4134.48	11.9384	12.0879	noncoding	AY034104	lincRNA-TACR1-2	lincRNA	306	chr2	+	75186481	75252012		TGCAATAGAAGCTGTGGATGAATCTGCTTTTCTGGAAGGAAATAACCAGGAATGCAAAGA
ASHG19A3A032675	741.302	681.062	9.44372	9.50008	noncoding	ENST00000419108	AC078841.5	Ensembl	1849	chr7	-	36148633	36150482		AAATCCCATACCTCCCTGGCCTTCAAAAGCATTGTCCTTAAGATAAGTGCTGACTTGAAA
ASHG19A3A030644	258.204	278.278	7.92915	8.20713	noncoding	NR_027114	LOC285740	RefSeq_NR	1915	chr6	-	143875470	143883185		TCAAACGTCTTTCATTCAAGGTCACGTGGTAACTTGACTCCTCTCACCACTACTTCTGTG
ASHG19A3L0003437	806.939	757.356	9.56929	9.65457	noncoding	BC028019	lincRNA-C9orf57	lincRNA	3343	chr9	+	74526576	74600965		ACCGTCTTTGGATATGGATGAGGAGGAGGAAAATGTATTTCTTAGCTTCTGATAAGAGAT
ASHG19A3A041309	258.968	242.802	7.93264	8.00568	noncoding	NR_028407	ARMCX4	RefSeq_NR	5421	chrX	+	100673265	100788446		TGGGCCATGGTGGTTAGTCTTTATTTTCCCACACATCCTGATTCATTTCCTGTCCTTCTC
ASHG19A3L0002580	292.669	80.3044	8.10918	6.40357	noncoding	chr3:127258794-127273334+	lincRNA-TPRA1-1	lincRNA	14541	chr3	+	127258794	127273334		AAGGGAATGCATGTGTGCTTTCTCTTCAACCTTAGTCTCTAAAACTACTCAGCTCTGCCC
ASHG19A3A028165	211.766	120.29	7.64559	6.99369	noncoding	uc010ivk.2	AK311398	UCSC_knowngene	988	chr5	+	43067682	43093658		AAATCATTTCCATCTTTTTCTGGATGAACCTGGGCGGATGTCAGACCAGAGAAGAGCACA
ASHG19A3L0001186	148.438	180.563	7.13158	7.57997	noncoding	AI948514	lincRNA-EML4	lincRNA	444	chr2	-	42565867	42566311		AATGCTTTCATGGGAAGCAGTAATTCTCCCTGTGAGTGAAAACTGTTTCCTGAGGCCTTT
ASHG19A3L0003411	318.211	274.704	8.22681	8.18694	noncoding	chr18:46516702-46521932+	lincRNA-DYM-2	lincRNA	5231	chr18	+	46516702	46521932		AATGCTTTTCAGTTGGCTTTGTGGAGTGTTTGCCCTCTGCAGTCAGACTCTGTCTTTTGA
ASHG19A3A023170	2459.2	2521.3	11.1726	11.3934	noncoding	ENST00000505910	RP11-723O4.3	Ensembl	329	chr3	+	128588466	128588869		ACAGAAGAAGAGTCCTCCCTTCCAAGCTCTGGCAGGCAATACAGTGCTCCTGGTCCTCCA
ASHG19A3A054863	323.076	343.537	8.24846	8.51434	noncoding	AF052103		NRED	1329	chr16	+	85399033	85400344		TCCCTTGCTAGCGTGTGACTCTGTGTGTCTGTCTGTGACTGGTTTAGATTTGTATGAAAT
ASHG19A3A052764	253.978	229.928	7.90629	7.92782	noncoding	uc001zks.1	AK127696	UCSC_knowngene	2317	chr15	+	40331511	40359491		GGAGTCAAAACTTACGTTCTGGCCCCCAGGTACATTTCCAGTCTCTTACTCATAAAATTG
ASHG19A3L0002824	2423.46	2342.11	11.1513	11.2836	noncoding	chrX:40874482-40878593+	lincRNA-USP9X-7	lincRNA	4112	chrX	+	40874482	40878593		CAGGGGTCCCTTCTCCCCTTATGCTCACATTAGAATTTTCCCTTGACCTATTGAATGATG
ASHG19A3L0002055	365.989	378.898	8.42598	8.65832	noncoding	BX646285	lincRNA-LZTS1-2	lincRNA	659	chr8	-	21436585	21437243		TGGCTGATAACACGTGTGAGTGTGCATGTGTCTGTGTGCGTGTTTTGAGTGTATGAATGA
ASHG19A3L0001614	249.621	263.871	7.88097	8.12824	noncoding	chr5:171107070-171142645+	lincRNA-FBXW11-3	lincRNA	35576	chr5	+	171107070	171142645		AACAAAAAGACATCACCTCTCTTATACTGTTTTGGAACTGCTGACTGCCCTCACCACATT
ASHG19A3A012478	674.273	758.832	9.3041	9.65756	noncoding	ENST00000444167	AC006504.1	Ensembl	1329	chr19	+	28284401	28297684		CCTGAATTCCACGCTGGGACCTTAATTTGGTTTTAACACAAATAAAGATCTCACATAAAG
ASHG19A3L0000424	223.217	304.782	7.71883	8.34381	noncoding	CD656234	lincRNA-CWC15	lincRNA	688	chr11	+	94631076	94631759		TACCTCACCAATACACAATTGAAGTTCTTCTGTAGCTCCCATTGCCTCTGGGAAGACTTC
ASHG19A3A015554	106.268	87.444	6.65899	6.52147	noncoding	uc002rrq.2	BC042073	UCSC_knowngene	1436	chr2	+	39663777	39831214		AGAGAGATAGGACTGAACCCTCGTACCTTCAAACATATCTAAATCTCTGGTGCAGTTCAG
ASHG19A3L0002123	299.845	303.158	8.14309	8.33629	noncoding	BQ708152	lincRNA-EYA1	lincRNA	967	chr8	-	72586695	72587543		GCACAGGGGGCCAATAGCTGTGTTTCCTTGACCCCACCTTTTCTTTGTCACCAAAGGGGA
ASHG19A3L0002559	3192.76	3621.73	11.5566	11.8998	noncoding	AK299216	lincRNA-SKAP2-2	lincRNA	1360	chr7	-	26709157	27034858	NM_003930,	CACGAGTGACAGCTCCTAACCTCTCCTTGTTTTATTAAACATTACTTATCTTTGACTGTT
ASHG19A3A019031	206.313	192.344	7.60423	7.67043	noncoding	ENST00000411878	AF254982.2	Ensembl	311	chr21	+	10872118	10872429		TTTTTTACCATGGATACTATTTGAGCTGAATCCACCATCCCCTGGGCAACAGGCTGGAAT
ASHG19A3A051853	198.606	238.859	7.54678	7.98192	noncoding	AY927492		RNAdb	503	chr14	+	105281910	105282244		GCGTACGCCCCCGGACTGACGCCTCCCGCCGGGAGCCCTCTTCGAATCCCGCCTGCGCAA
ASHG19A3A045797	717.413	536.043	9.39694	9.1619	noncoding	ENST00000451822	AP002959.1	Ensembl	1071	chr11	-	121232558	121233631	NM_004329,	GCGTTGAGAATTAAGAAGATGCTTGCCAAGATGGTTGAATCCCAAGATGTAAAAATCTGA
ASHG19A3A035782	14993	15971.8	13.7997	14.0316	noncoding	ENST00000435260	AC046176.4	Ensembl	1170	chr8	-	56962596	56963766	NM_002806,	CATGCATCATTTTTATGGATGAAATAGATGCTATTGGTGGTCGTCGGTTTTCTGAGGGTA
ASHG19A3A048777	302.276	219.411	8.1544	7.86261	noncoding	AK124203		misc_RNA	2182	chr12	+	60006422	60008605		ACAAATGACAGGTCCATTCTGATCCTGATGCAGCATGTGCTCCCAGATAGTCTATTGGAA
ASHG19A3A019575	279.705	230.26	8.04305	7.93092	noncoding	AK126983		misc_RNA	5637	chr22	-	24243618	24249255		GCTCTATGAAACCCACTTTTCTGTACTCTGTTGCTCTAATAAACTTGCTTTGCTTTCACT
ASHG19A3L0001794	683.492	1317.43	9.32645	10.4504	noncoding	chr6:3775751-3789451-	lincRNA-C6orf145-2	lincRNA	13701	chr6	-	3775751	3789451		TAGAAAGGCCTGATTGTCCCCAAAATATCTTCCCCTGCTAAACTTGTCATCACATCTGAA
ASHG19A3L0000551	165.458	143.62	7.28733	7.24704	noncoding	AI767623	lincRNA-CLLU1OS-1	lincRNA	466	chr12	+	92652975	92751357		TCATCTTCACAATACCCTGGCTGGGAACTTCTGCAGCCTATTTCATCACCTTCTTGAGTT
ASHG19A3L0002076	1110.79	1025.66	10.0329	10.0867	noncoding	DW444236	lincRNA-ZNF703-2	lincRNA	227	chr8	+	37001355	37001513		TCTGTCTCATTCCCCATCTCTCTATTCCAATCCCGCTCTTACTATGTGAATAAAAGATGG
ASHG19A3A036068	203.835	103.544	7.58727	6.77079	noncoding	ENST00000503142	RP11-46A10.6	Ensembl	537	chr1	+	180933646	180935045		TTTATTTCAGTTGGGTATGTGGACTCGCACCCTATCACCACATATGACAGTGTCACTCAG
ASHG19A3A014280	160.46	154.815	7.2456	7.35819	noncoding	ENST00000451749	AC073409.1	Ensembl	269	chr2	-	124200841	124202021		GTGTAGAAAAAACAAGAAAATTGTGTACCTAACTCTCCATGGTAACCTCTCTCACTTTTT
ASHG19A3A025993	107.693	111.058	6.67975	6.87345	noncoding	NR_027106	LOC285419	RefSeq_NR	2222	chr4	+	124695418	124786732		GGATTTTCACTCTCTTTCACTGGGCTGCTTTTCAATCTTATTTCACAGATAGCAATATTA
ASHG19A3A010216	92.6548	72.5456	6.46038	6.25953	noncoding	NR_024259	LOC728606	RefSeq_NR	2598	chr18	-	24267584	24283602		ACACATCTTCCTTGTTTATCTCTCTCAAAGGAGTGTGGAGTGCTTCATCTGGACATCCAC
ASHG19A3A020653	7860.19	8684.63	12.865	13.1551	noncoding	ENST00000450418	AC023480.1	Ensembl	2315	chr3	-	4023664	4025979	NM_033109,	CCCTAGGATTAGAAGTTGGCCAAGAAATTCAGGTGAAATACTTTGGATGTGACCCAGCTG
ASHG19A3L0002816	336.965	362.992	8.30736	8.59947	noncoding	BM923628	lincRNA-BCOR-5	lincRNA	1670	chrX	+	39633448	39667369		TTATTTTTCCTGGTAATAAATGAACCAACTTTTCCCTGCCTTATTCCGTAAGCCCCCAAC
ASHG19A3L0000516	134.9	99.4227	6.99255	6.70951	noncoding	chr12:61176358-61214183-	lincRNA-SLC16A7-3	lincRNA	37826	chr12	-	61176358	61214183		CTTCCACAAGAATTTTCTATTATTCATCTGTCTTCCCATAATTTGGATGTAACAGCTCTG
ASHG19A3L0002397	149.382	139.097	7.1413	7.20229	noncoding	chr1:88059958-88068318+	lincRNA-PKN2-2	lincRNA	8361	chr1	+	88059958	88068318		ATGAGACTCCAAACCCAAGTTTGTCATGCTAATCCTTTCTTTATTTCCTTCCATATTGCC
ASHG19A3L0000874	1331.38	1348.74	10.2929	10.4827	noncoding	BG273037	lincRNA-CDH5-2	lincRNA	387	chr16	+	66296092	66296464		TTCTCCCCTGTATGGGCTAAGCTGCTCTAACAGGTAGAGGACACCCTACCTGAGAGAGCG
ASHG19A3A021367	370.091	287.693	8.44043	8.25531	noncoding	ENST00000485582	MT-CO3	Ensembl	781	chr3	-	106615737	106616518		TCTGCCTACTCCGCCAACTAAAATTTCAGTATACATCTAACTGCCATTGTGGATTTGAAG
ASHG19A3A014835	249.426	305.054	7.8796	8.34495	noncoding	ENST00000420922	AC073043.2	Ensembl	772	chr2	-	200625272	200715596		TGATTCCGATTTACCCTCTCTCTGGTGTCACAGTGGAATAGTGTGGAGTGGTGGCCAGAA
ASHG19A3A040710	167.806	138.675	7.30598	7.19807	noncoding	AK092616		misc_RNA	1806	chrX	+	15749866	15751672		CTGCCCAGAAATATCCTACTAATCAGATCAAGAAAGCCTGGCTATGAAAAAATATGGCAT
ASHG19A3A013848	711.972	1199.92	9.38599	10.3153	noncoding	ENST00000453103	AC073046.4	Ensembl	601	chr2	-	74174768	74208568		TGTGGTTCTTCAGGAAGTTAACACGTGGAACTAACACTGTTGGATGCTGCTGAACTCTCA
ASHG19A3L0000692	135.781	102.382	7.0024	6.7536	noncoding	BM676747	lincRNA-DCT	lincRNA	348	chr13	-	95166133	95166457		TGCCCCGTCGCCAATCCCTGACCTTTTACATCTAATCAAGAAAAGAGATAGGTATCTATC
ASHG19A3A040750	96.6712	78.4414	6.52472	6.37212	noncoding	ENST00000442155	GS1-433O24.1	Ensembl	382	chrX	+	22716573	22787083		TTTGTGTTGTCCATCATGCTCAAGTGCCTATTAAAAAGCCTGCTTATTTATTGGTAATGA
ASHG19A3A025465	89.2643	121.485	6.40378	7.00676	noncoding	AK098597		misc_RNA	1683	chr4	+	42097863	42101378		GAAATGCCCATAATTAATTTGTGTTTGCTTTTCCAGGTTTCCTTAAGCTTCCTAAGTTTC
ASHG19A3A000450	254.273	161.256	7.90848	7.41813	noncoding	ENST00000505360	Z83745.1	Ensembl	2234	chrX	+	57244099	57251237		catgcagtcggtcactgatctcgcctactggcacagacgtgtttccagacaatccagatg
ASHG19A3A026882	2752.34	3054.54	11.3406	11.6539	noncoding	ENST00000515142	RP11-83M16.3	Ensembl	405	chr5	-	66985860	66986265		GAGCACGTTTTACGATATGGGATAAGCTATTGGAAAGATCTCATAAAATGGTAACTGAAG
ASHG19A3L0000161	354.807	311.55	8.38102	8.37436	noncoding	AI251987	lincRNA-MYSM1-1	lincRNA	204	chr1	-	59188025	59188217		TTAAAGCCCACTTAGTAACTTGTTTCATCCAAGGGCCTCCTTCATCCTTTCCAGCTTTTG
ASHG19A3A029294	301.578	284.427	8.1508	8.2384	noncoding	ENST00000511331	CTC-338M12.4	Ensembl	1000	chr5	+	180673522	180699168		TGGCTTTCCGACGACCAGACCCTGCAGGATTCGGCCTTTCCCTTTGGAGTTTTCCTCCAT
ASHG19A3L0002006	129.296	156.699	6.93518	7.37649	noncoding	DA579624	lincRNA-GSDMC-8	lincRNA	568	chr8	+	129354185	129354753		AAATGGTACCTCAGGTTCTTTTTCTCTCTCTAGATCCTGGCTGCATAATAATTTTCCTTT
ASHG19A3L0001375	196.111	330.218	7.53199	8.45702	noncoding	chr3:32827971-32840646-	lincRNA-CNOT10	lincRNA	12676	chr3	-	32827971	32840646		AGGAAGGCATTCCATTTGGTATCTAAGAGAAATGAAAATGTTTGTAATTTCCTAGAAGGG
ASHG19A3L0002115	85.2373	102.521	6.33275	6.75558	noncoding	DA834198	lincRNA-CYP7B1-1	lincRNA	884	chr8	-	66503935	66504824		TAAAATTTACCTCTTTTGGTTTGAAATCTGGCTGGCTCTGGTGGCCAAGCTTGGAATTCA
ASHG19A3A012949	431.817	517.686	8.66246	9.1114	noncoding	uc002pxl.3	UNQ2487	UCSC_knowngene	1893	chr19	+	52196592	52208442		ATCTAGCTCCCCGCTGTCTCAGATCCCACCGAGAAGTCTGGGTTCCCAGCAACCTCCAAC
ASHG19A3L0001121	87.4184	80.3861	6.37087	6.40477	noncoding	AA629022	lincRNA-GLS-1	lincRNA	458	chr2	+	191705024	191705481		AAGTATTTCAGGAAATTCCCAGGAAGGGCTCCCTTGTTTGATAAAGGCACAATGACTTGC
ASHG19A3L0002353	113.742	109.902	6.75379	6.85785	noncoding	chr4:158942228-158975298+	lincRNA-FAM198B-2	lincRNA	33071	chr4	+	158942228	158975298		TTCCACTTACTATATCTCAGTGCTCCCTGGAGAATAATCAGAATCTGATCCTTTAAGATA
ASHG19A3L0001552	144.283	117.642	7.08772	6.95847	noncoding	chr4:10120852-10137502+	lincRNA-ZNF518B-1	lincRNA	16651	chr4	+	10120852	10137502		CCATGTGAGTGACCTTGATTCCAGCTTTCTGGTTTTTCTCACCTGGTGAATGTCAGAGTT
ASHG19A3L0001261	168.621	177.552	7.31202	7.55865	noncoding	exon2439+	lincRNA-PTPN1-2	lincRNA	272	chr20	+	49050156	49050427		AGCAGCTATGCCAATTGTATGACAATGTGTCCTCCCATAGAAAATTTAACCGCCACCACC
ASHG19A3L0002552	443.366	380.873	8.70002	8.66447	noncoding	chr7:136275537-136279697+	lincRNA-CHRM2-2	lincRNA	4161	chr7	+	136275537	136279697		TTTAGTGAGCTGGTCTCCATGGCACTTCCTTCATCTGTGGTTTTCTGTGCATTTGTCTCT
ASHG19A3A033073	4291.6	4092.1	11.993	12.0718	noncoding	uc003ugj.1	BC037783	UCSC_knowngene	2113	chr7	-	77287972	77326662		AAGAAACGATACAGAAAATAAGAGTGTCGGCCATCCCCCTCTCTGCAACCGAAATTACAG
ASHG19A3A026618	176.225	313.307	7.377	8.38119	noncoding	ENST00000507887	CTD-2306M5.1	Ensembl	638	chr5	-	25413547	25446034		GTTTATTTACAACCAACATCTCATTTCCCCGTAAGTCTCCATTTCTTCTCATATGCACTG
ASHG19A3L0001629	3080.84	4089.98	11.5071	12.0706	noncoding	AK289547	lincRNA-CDH18-2	lincRNA	3540	chr5	-	19473156	20575982	NM_004934,NM_001167667,	TCCTGTAGAAACAAGTGCCCTTTTCATGATCGAAACTGGGTTATTTAATTGGAAGAAAGT
ASHG19A3L0002537	65.3065	80.8711	5.95215	6.41433	noncoding	DA422275	lincRNA-BET1-3	lincRNA	561	chr7	-	93996523	94021504		ATCATCACTGATATAATGTCAGAGGAGGTCACTCTCTATAGCCCAACCTCCAGGATTTCA
ASHG19A3L0001719	169.684	146.493	7.32187	7.27686	noncoding	EL949266	lincRNA-CENPW-2	lincRNA	639	chr6	+	126423663	126424282		AAAGCAGGCTCTATTTATCCTGCAAGAACTGTGGAACCTCCTCGACTTCCATCGTAAACT
ASHG19A3L0000332	129.506	102.883	6.93712	6.7609	noncoding	AI827996	lincRNA-CDON-2	lincRNA	388	chr11	-	125977055	125979006		CTTCATCTTTTTGTGCCATGGATGCAGTCCGAAGTCCATGGGCCCCTTCCTGGGATTTAA
ASHG19A3L0000863	633.062	908.245	9.20948	9.91034	noncoding	CR739801	lincRNA-PARN	lincRNA	746	chr16	+	14399103	14399849		CTGAATATATTTTGGCTTTTCTCTTTTTGCCTCTGTGTGAGAAACTTCATTAAGCAGTTG
ASHG19A3L0002836	5618.41	5957.98	12.3742	12.6256	noncoding	chrX:118631438-118670334-	lincRNA-SLC25A5-2	lincRNA	38897	chrX	-	118631438	118670334		ATTTGCAAAATGATGTGTTTCCAACTCTCATGCTCCCTCCATCCACATTTGCCAGATGGC
ASHG19A3L0000414	410.326	399.814	8.58605	8.73636	noncoding	AW868654	lincRNA-ME3	lincRNA	206	chr11	-	86427982	86428180		TATGCCATTCAAGATGTGTAGTAAAATTGTGAAGACCCCCTAAGTTACCCACCCATGCTG
ASHG19A3A030623	5521.13	5371.36	12.3505	12.4718	noncoding	ENST00000402768	RP11-15H7.1	Ensembl	767	chr6	-	139935574	139936341		ACTGGGAACGACTGCATAGACTATATAAGGAAGTAAAGAATCACCTGGACTATCATATAA
ASHG19A3L0002080	169.576	113.007	7.32077	6.8997	noncoding	chr8:37531517-37542367+	lincRNA-ZNF703-1	lincRNA	10851	chr8	+	37531517	37542367		AAGATACTGACCAGTCCTGATCCTTCTTCCCAGTGTCACAGAGTCAAAGTCACTCACAAA
ASHG19A3L0001473	1800.31	2138.29	10.7284	11.153	noncoding	AA593324	lincRNA-FGFR3	lincRNA	413	chr4	+	1778004	1778418		ATTTCACTCCAATAAAAGTCTCAATGGCGGCTCACAGTGGCCTCCTCCCCTGTCCCAGGG
ASHG19A3L0000885	202.474	198.826	7.57782	7.71883	noncoding	DB337334	lincRNA-MLYCD	lincRNA	535	chr16	-	83967247	83967782		ATCCTTCCCTGGAAGCTCCAGAGGGCGGGGGTCCTGCTGATGCCTTGAATTTTGACTTCT
ASHG19A3L0003560	151.445	147.209	7.16067	7.28509	noncoding	AA164863	lincRNA-TMEM9	lincRNA	472	chr1	-	201142621	201143091		ATGAAGAACCCCCTTCTATGGAGATTTGTAAGAAGAGTTCTCAGTTGGGCATGGAGAAGG
ASHG19A3A040156	4494.62	2443.86	12.0572	11.3409	noncoding	ENST00000454702	RP13-211P9.1	Ensembl	592	chrX	-	94031806	94032398		TCCATAATTGCACAGTCTGGTGTTTTTGGCTTTTCATTAGGGAACAACGCCAAGTGTCTT
ASHG19A3A033785	115095	119009	16.8317	16.8406	noncoding	ENST00000451203	AC104843.3	Ensembl	319	chr7	-	152299297	152299977	NM_021029,NM_001001,ENST00000494882,ENST00000490372,ENST00000443749,ENST00000413334,ENST00000399253,	TGCAAGCATTTTGAACTGGGAGGAGGTAAGAAGAGAAAGGGCCAAGTGATCCAGTTCTAA
ASHG19A3L0002231	684.747	698.277	9.32878	9.53629	noncoding	BI756930	lincRNA-GLRA4	lincRNA	848	chrX	-	103005763	103006604		CTCAGTCAAACACCATCCCTGCCTTGTGTTCATATTCTGTGTCCCTATTCAAGAAAGGTA
ASHG19A3L0001226	659.421	987.048	9.27349	10.0309	noncoding	DA330754	lincRNA-TMSB10	lincRNA	558	chr2	-	85191205	85192095		TTGTGTTTCCCTTTTTAACCCCATTCTCTACCTTATGCAACTGGTGCCCTGTGGTCAACT
ASHG19A3A043933	1382.97	730.466	10.3462	9.6012	noncoding	ENST00000420752	RP11-507K13.4	Ensembl	1053	chr10	+	50979886	50981345	NM_002748,ENST00000512867,	ATGTGAAAGGAATGGATTGGTTAAAGCCAGATAGCACTAAAGGAAGCATCACAGCAACTG
ASHG19A3L0000883	100.228	114.673	6.57714	6.92064	noncoding	R08380	lincRNA-HSD17B2	lincRNA	332	chr16	-	82169306	82169610		CATTAACAATCAATCTTAGGACACAAGTGGATTGTTTTTATAAATAGGGGTCTCCCTCAA
ASHG19A3A026813	631.295	649.392	9.2054	9.43401	noncoding	ENST00000515236	RP11-365H8.3	Ensembl	1327	chr5	-	55571130	55572457		CAAAAAATCTATAGAAAGTGTTCTTTATAAGAAACACGAAGGCATCCCTGAGGGGCTTTA
ASHG19A3L0002939	117.056	123.519	6.79395	7.03254	noncoding	chr7:45323806-45407638+	lincRNA-ADCY1-1	lincRNA	83833	chr7	+	45323806	45407638		GTCAGCAGTTTTTATTGTAACTGTCTTTTCCCTGGATTGCACATCTTTCCACTTAAAAAA
ASHG19A3A022573	135.337	114.554	6.99719	6.91924	noncoding	NR_033373	FLJ39534	RefSeq_NR	2540	chr3	+	47205859	47285605		CACAGCTGGCGACTGACAAACAGCAGGCGACGTCGGGAGAACTCCCCGAGACACCCGAGA
ASHG19A3L0002086	284.281	238.775	8.06697	7.98137	noncoding	DA942624	lincRNA-KIAA0146-1	lincRNA	581	chr8	+	47834211	47840458		AACTTTTGTCAAAAATCAGAATGCACCAGCCTTGCCTTTGGAGCCACCTACATCGACTTC
ASHG19A3L0002534	376.924	305.595	8.46812	8.34831	noncoding	chr7:93805214-93810289+	lincRNA-COL1A2-2	lincRNA	5076	chr7	+	93805214	93810289		TATCCCTTTCTGGACTGCCCCATTTGTGTAGGTTTGTTATTGGTTTCAGACCTGTCCAAG
ASHG19A3A046133	1167.3	1305.07	10.107	10.4345	noncoding	ENST00000499953	AC026250.1	Ensembl	927	chr11	+	9780544	9812791		AATAATGCTGTGTGCTCCCTCTTTGCCTGCTACTGAACAATGACGTCTCTTGTTGTGAAC
ASHG19A3L0000140	1026.14	1212.05	9.91948	10.3305	noncoding	exon90+	lincRNA-KNCN	lincRNA	643	chr1	+	46985867	46986509		TGCACTGGACCACACAATCCCAGGGTGTCTGTCTCCCTGTCTCTCATGCCTGTGTACACA
ASHG19A3L0003573	69.2917	76.6612	6.03613	6.3422	noncoding	chr3:182007053-182019242+	lincRNA-ATP11B-2	lincRNA	12190	chr3	+	182007053	182019242		AACTTAGATCTTTTCACATCCTTTCAATTCTGTCAACCCACATAAGGCTGGCTAACAGCA
ASHG19A3L0003055	1613.8	1529.45	10.5683	10.6625	noncoding	chr8:48104990-48105990+	lincRNA-KIAA0146-2	lincRNA	1001	chr8	+	48104990	48105990		CCAGTCCATGGAACAGGCGCTTCTCCTCCTATCCATTTATGCCGTAGTTTTCATGAATTT
ASHG19A3L0001769	301.749	389.445	8.15142	8.6979	noncoding	chr6:170239050-170268025-	lincRNA-C6orf70-1	lincRNA	28976	chr6	-	170239050	170268025		TGAAAACGGAGTCTGGGCGCTTTAACATCTGGGAAGCTTCTCGCCCTCTCCTTAGCCTGC
ASHG19A3L0003328	71.5918	78.6206	6.08209	6.37539	noncoding	chr5:172696910-172713472-	lincRNA-NKX2-5-2	lincRNA	16563	chr5	-	172696910	172713472		ATTAATACATACCTGGGAGGGCTAACTTGTCACCCTTGAGATTTCTGCCCTGAGAGATGA
ASHG19A3L0002971	78.4741	122.18	6.21471	7.01589	noncoding	CV315884	lincRNA-ZNF652	lincRNA	244	chr17	+	47338132	47338356		ATCCTACCTCAAATCAAACTCCACTCTGGGGCTACGGACATCTAGAAGTGCGCCTGGGTG
ASHG19A3A020672	809.143	703.708	9.57257	9.54743	noncoding	NR_033378	LOC100288428	RefSeq_NR	2147	chr3	-	8262834	8543344		AGAATCATCCAGCTCTTTTCTCCTCTTCAAAGTTGCCCTTCTTTTCTCTGAACATTAATG
ASHG19A3L0000729	270.697	309.481	7.99845	8.36526	noncoding	AW749030	lincRNA-POLE2	lincRNA	542	chr14	+	50108441	50108957		TGGCAATTTACACTGCCTTGTTTCACTTCACTTCATCTTGTTCAACCGCAGTTGAAAGAC
ASHG19A3L0002181	484.291	582.407	8.82498	9.27782	noncoding	exon4209-	lincRNA-NIPAL2-2	lincRNA	155	chr8	-	99406238	99406392		TTGAGAGTTCTGAGACTACAGCAACATCTCCCAAGACACAATCTTATCCTGCTGCTCACT
ASHG19A3L0003184	293.487	304.468	8.11222	8.34244	noncoding	AK310205	lincRNA-SLC15A1	lincRNA	1239	chr13	+	99330071	99380707		ATATTAGAGTTCTTTGTTGCCAGGGCTCCCTGAACATGCTCCACCTCCATTAGGAATCTA
ASHG19A3A007175	354.354	322.415	8.37891	8.4227	noncoding	NR_015353	LOC92249	RefSeq_NR	2886	chrX	-	62646438	62780873		ATTATATGCTTTCCTTTGCTCCCAGGTCCTGCAACCCTGGTTCCAGTCTGGCAAGCATTG
ASHG19A3L0001346	70.7738	65.5728	6.06667	6.11511	noncoding	chr3:16757321-16768646+	lincRNA-PLCL2	lincRNA	11326	chr3	+	16757321	16768646		GAGGGCCATTTTGTGGATATTGTGCTCTCTAAACTTGTAGTTGGCTCCAAATTATCACAG
ASHG19A3A054409	1482.53	1062.22	10.4467	10.1369	noncoding	AF143879		misc_RNA	581	chr16	+	25271823	25272384		GCTAGTGCACTGCCTTTTGCAGGTTGCTGGTTTCTCGAATAAAGCTAACTTTGCTTTCAC
ASHG19A3A046225	67759.9	66318.1	16.0359	16.0261	noncoding	ENST00000476147	RP11-587D21.1	Ensembl	375	chr11	+	27603226	27603601		TCAAAGCACAGAGCTAAAGTAATTTACACCAGAAATACCAAGGGCGGAGATGCTGCAGCT
ASHG19A3L0002117	76.2801	68.1622	6.1735	6.17031	noncoding	AV731505	lincRNA-PDE7A	lincRNA	403	chr8	-	66865963	66866366		ATAAATGCAGCCAATGGCAACTAACACATGCTTCTTGTTGTCATCCAACCTCTTTCCCTG
ASHG19A3L0000129	80.7048	82.4773	6.25542	6.4405	noncoding	BU663229	lincRNA-POU3F1-1	lincRNA	555	chr1	-	39183439	39183984		AAGGTGAAGGAAATGGGTTTATGAAAACTGCCTCTGATTGCCATCGGGTGTGAGGTTGTT
ASHG19A3L0000039	1790.31	1627.38	10.7208	10.7549	noncoding	AV722915	lincRNA-PTGS2-2	lincRNA	669	chr1	+	186489181	186489845		TGTCACTAAAATACCTCATTTATCCCTCCCACCTTCTTCTGCCAGAATGATATATTTATC
ASHG19A3L0002368	4800.79	5890.4	12.1547	12.6073	noncoding	AX747492	lincRNA-HFE2	lincRNA	4510	chr1	+	145209144	146424095	uc001erc.3,uc001ekp.3,uc001ejz.1,NM_183372,NM_015383,NM_015383,NM_001102663,NM_001101663,NM_001039703,NM_001039703,NM_001039703,NM_001039703,NM_001039703,NM_001039703,NM_001039703,NM_001039703,NM_001039703,NM_001039703,NM_001039703,NM_001039703,NM_001037675,	AGGACTCACTGGGTAGATGTTATTCGACTCCTTCAGGTTATCTTGAACTGCCTGACTTAG
ASHG19A3A035667	15044.5	14208.6	13.805	13.8623	noncoding	ENST00000509266	AC026979.1	Ensembl	1967	chr8	-	30044816	30047775		AGGCAAAGTCCTATATTTTGACACTTTTCTCTCCCTCCCAAACATTCACGGTTGCTTTAC
ASHG19A3A041307	357.007	69.2537	8.38883	6.19372	noncoding	ENST00000446763	AL035422.2	Ensembl	403	chrX	+	100673285	100701120		ACATATAATGTTGGCTCTTCCATTTGTTTCTAATTTAGTATTTCTCAATTGATATTTTTT
ASHG19A3A035273	695.061	556.292	9.35247	9.21645	noncoding	AF088026		RNAdb	703	chr1	+	173832385	173833077	ENST00000416578,	GATGAAAAGCACTGTCCTTTTTTAAGTAAACACTACACACTCCAGATGGATTGCAAAAAT
ASHG19A3L0002159	106.405	86.1408	6.66117	6.50102	noncoding	DA271257	lincRNA-CALB1-1	lincRNA	509	chr8	-	91323727	91324235		GTTCCTACTCCTTTTTACTACTACTGCCTGACTTTGGGGCAATGCTTTGCTATTATCAGC
ASHG19A3L0001660	157.101	155.788	7.21491	7.3688	noncoding	DA267910	lincRNA-ESM1-2	lincRNA	570	chr5	+	54030915	54031484		CACCCTATTCCCTCACTTTTCAATCACTTTACCTATGACTAATAGAAAGTTCAAAGCAAA
ASHG19A3A042724	40207.7	38027	15.2448	15.2673	noncoding	NR_003277	LOC728643	RefSeq_NR	542	chr10	-	47133296	47133836	NR_002944,NM_031157,NM_002136,NM_001011725,NM_001011724,ENST00000505767,ENST00000444945,ENST00000436090,ENST00000429216,ENST00000424481,ENST00000421426,ENST00000406883,ENST00000406078,ENST00000222956,	AATGAGTCTTCAAATTTTGGACCCATGAAGGGAGGAAATTTTGGAGGCAGAAGCTCTGGC
ASHG19A3L0000834	144.372	178.952	7.08829	7.56908	noncoding	DA150164	lincRNA-LINGO1-3	lincRNA	573	chr15	-	77908174	78113242		TACCTTGAGTCTGTGGGGCTACACAGCCTTCAGCCTGCATCTCCAGGGCTCTGACTCTAT
ASHG19A3A051744	6926.77	8831.39	12.6808	13.1877	noncoding	ENST00000504119	AL133167.1	Ensembl	2930	chr14	+	96342728	96391899		CGAGGTGCCCCTCCCCTGTAGGGACCCCGACGCCGCCAGCCCCTTCCTCCTTTCCCGCAG
ASHG19A3A050199	208.98	241.479	7.62348	7.99778	noncoding	ENST00000413926	RP11-547C18.2	Ensembl	606	chr13	+	51657936	51659535		AAAGAGCTCTGCATCCCACTCCATATCTTCTCCTGAGAAGTTGAAAAGGATCTGTCTGGA
ASHG19A3A047265	39093.2	32186.6	15.2043	15.0229	noncoding	ENST00000470614	RP11-69M1.1	Ensembl	315	chr12	-	8147365	8147680	ENST00000480485,	CACAGTCTTTCTGAGGTTGTTAAACAGATTGCTTCCATCAGTATTGAGTCAGGAATTGAG
ASHG19A3A000037	1581.41	1572.22	10.5424	10.7014	noncoding	BC040186		RNAdb	4580	chr10	-	119243810	119301845		ctataagccaaggaacgccaaagattgccaCCCACCCCACTCTATGCTGTCCACAGCCTC
ASHG19A3L0001678	31239.7	27570.1	14.8778	14.809	noncoding	BC030521	lincRNA-PTCD2	lincRNA	2134	chr5	-	71515352	71689054		ATTCAAGATTGTGCTCTTCTATCAAAAGCCTCTGGAAATAAATGTTCCGGGATCATGAAA
ASHG19A3L0002610	751.859	825.23	9.46382	9.77944	noncoding	CR599308	lincRNA-AEBP2-2	lincRNA	2138	chr12	+	19556999	19672288	NM_153207,NM_001114176,	GTTGGTCTTGAAAAGGAAAATAAAATCACTTTCTTGCTTGGTAAGCAAGAAGCCATATCG
ASHG19A3L0003287	172.367	166.374	7.34497	7.46207	noncoding	chr3:194505234-194523815+	lincRNA-C3orf21-1	lincRNA	18582	chr3	+	194505234	194523815		GGTTCTACTGCCTCCAAAAGTCTTCGGAGTCTTTTCTTACTACTTCTGCCTATATCTTTT
ASHG19A3L0000057	116.134	118.54	6.78293	6.97095	noncoding	chr1:198335952-198347302-	lincRNA-NEK7	lincRNA	11351	chr1	-	198335952	198347302		AATGCCTCCTTCTTAAGCAAATAGCTATGCACTCTTCAGGATGTCAGTCCCTTCTTCAAA
ASHG19A3A040340	130.421	87.9677	6.94657	6.53005	noncoding	NR_027131	CXorf42	RefSeq_NR	2434	chrX	-	119370310	119379122		GGAATGTCAGCTCATAAAATGAGGCTTCCTTGTAATTCTGTTTAAATGACTTTTCCTTTG
ASHG19A3A049644	69156.1	73263.8	16.0664	16.1734	noncoding	ENST00000427761	RP11-248N6.3	Ensembl	952	chr13	-	68406007	68406959	NM_199185,NM_013269,NM_002520,NM_001004419,ENST00000429734,ENST00000399556,ENST00000396848,ENST00000396690,ENST00000393516,	AGCAAAAATGCAAGCAAGTATAGAAAAAGTGGTTCCCTTCCCAAAGTGGAAGCCAAGTTC
ASHG19A3L0000991	89.3045	109.308	6.40474	6.85052	noncoding	DB546676	lincRNA-CBLN2-1	lincRNA	426	chr18	+	68423781	68424207		ATCTTTCAGTGTGATTATTTGATGACTGTCTTTCCTCCGTAATAAACTCTGCACTTCACA
ASHG19A3A043100	288.993	93.834	8.09069	6.62472	noncoding	NR_024467	LOC100188947	RefSeq_NR	1038	chr10	-	93066719	93371217		AAGGTCCACCACAAATCCAGCTGAAGAACTGCTCCAAAGTTTAGGTCATGGCAAGAACAA
ASHG19A3A012444	193.581	173.453	7.51278	7.52239	noncoding	ENST00000506371	AC010329.1	Ensembl	3048	chr19	+	20997934	21005077		GTCTCCAGAACCAACACTCTTGAATACAACAATAAAACCCCTCTTCAAACAAACAAAAAA
ASHG19A3L0003454	160.474	186.846	7.24566	7.62816	noncoding	chr2:119422342-119427395-	lincRNA-INSIG2-4	lincRNA	5054	chr2	-	119422342	119427395		TATTTTTGCCTTCAAAGATCTTGAGAGATTTACCCTGGTTGTCCATGTGGCTTCTCCACA
ASHG19A3L0000027	847.913	1073.1	9.63873	10.1507	noncoding	BU188646	lincRNA-FCRL5-2	lincRNA	790	chr1	+	157387042	157387797		TTCCTGTAGAGTGGGAAATAGAAATGGTCTATCATCTCCAAAACCTTCCCCACCCTCTGT
ASHG19A3A052659	217.295	224.375	7.68089	7.8918	noncoding	uc001yxn.3	SNURF-SNRPN	UCSC_knowngene	7846	chr15	+	25304603	25367621		CAGCCTGTGGTGTCAAATGTCCTGCCTCTTCAAATGTGTTTGGATCGATGATGAGTCCCC
ASHG19A3A048534	209.732	243.841	7.63051	8.0128	noncoding	BC014370		NRED	1587	chr12	+	46781527	47269938		GCAGCCCTGGTTAAGCATTGAAAAGATGATATTACCAATAAGTTGACTCTAATTGTAAAC
ASHG19A3A055211	1670.24	1902.59	10.6199	10.9875	noncoding	uc003mto.2	BC087858	UCSC_knowngene	1322	chr6	+	1496349	1519554		CACTGCTGCAGGGCCTTCAACCTGGATCATCCAGGTCTTCACAGGACTCCTCCCCCAGAA
ASHG19A3L0000994	821.892	1239.73	9.59463	10.3633	noncoding	chr18:71300370-71356620-	lincRNA-NETO1-3	lincRNA	56251	chr18	-	71300370	71356620		CCATTGAAAAGTATGTATTTAAATAGAAAATATTGTGTGTGTGTGTATGAATCCTAAGGT
ASHG19A3A034020	31597.5	32422.7	14.8938	15.0331	noncoding	ENST00000396599	AC005062.3	Ensembl	483	chr7	+	20042387	20042870	NR_026911,NM_000982,ENST00000497954,ENST00000497298,ENST00000496412,ENST00000495531,ENST00000494303,ENST00000493462,ENST00000491435,ENST00000486904,ENST00000486753,ENST00000485945,ENST00000485147,ENST00000482905,ENST00000482506,ENST00000480465,ENST00000477341,ENST00000473808,ENST00000472975,ENST00000472300,ENST00000471393,ENST00000465295,ENST00000465083,ENST00000463605,ENST00000461458,ENST0000045…	AGTTAAGGGCAAGATTCTTGCCAAGAGAATTAATGTGCGTATTGAGCACATTAAGCACTC
ASHG19A3L0003470	170.492	134.113	7.3293	7.14851	noncoding	chr2:118805569-118808550-	lincRNA-CCDC93	lincRNA	2982	chr2	-	118805569	118808550		CATTTCCAGATCTCAATATTGTCTGCCTTCCAGAAATGTTTCATCCTAGACTTGAGTTAT
ASHG19A3L0002284	60.3768	82.1674	5.83298	6.43615	noncoding	CV358521	lincRNA-CTPS2-3	lincRNA	524	chrX	+	16578295	16578798		TGCTCTGGAAAAACAAAACAATAAATATATCCCACAGTCTATCCTTGGTAGTTCAGCGCG
ASHG19A3A016412	116.178	86.465	6.78338	6.50574	noncoding	CR610499		misc_RNA	2493	chr2	+	136988322	136990813		ACCATGTGTCCCAGATTTTCCAGGATGTTCCCCAAATTCATGTAGTTTCAATCTTTTCAA
ASHG19A3L0002291	183.015	170.517	7.43358	7.49782	noncoding	BE567543	lincRNA-BCOR-8	lincRNA	649	chrX	+	38763529	38763933		TATTCCTGGAGCAAACTGTTATTGGTGGTTCCCATTGGATCCTGTGCCTTTTTTGGGTTG
ASHG19A3L0000082	121.368	160.369	6.84379	7.41079	noncoding	chr1:22577463-22595288+	lincRNA-ZBTB40	lincRNA	17826	chr1	+	22577463	22595288		TTCCTGGACTCCACTCCAGGCGTTTGAAAGCCCTGGATGTCCCAACAATTTCAATTTTTT
ASHG19A3L0003525	133.98	140.914	6.98352	7.21916	noncoding	chr15:48164774-48170708+	lincRNA-SLC24A5	lincRNA	5935	chr15	+	48164774	48170708		CTTTTTATTCCAGTCTCCATTATCTATTGTCTATTTGTCCAGTTTTGCTAGTGGGTGACA
ASHG19A3L0002923	988.144	783.907	9.86474	9.70335	noncoding	chr12:77754619-77760162-	lincRNA-E2F7	lincRNA	5544	chr12	-	77754619	77760162		TTCCTCCTTACCCCCACTAAGCCACCAGGTATAGTATAGACAGGTGATCAAAACCAAAGT
ASHG19A3A041075	4135.59	3168.1	11.9344	11.7026	noncoding	ENST00000374922	RP11-622K12.1	Ensembl	1529	chrX	+	56755691	56844813		CTGAGTATTTTACCCAATCCTCTGAAATTAGTCCCTAGCATCAGAATTAAAGAATCTGAA
ASHG19A3A043990	193.18	82.0704	7.51001	6.4342	noncoding	ENST00000242475	ARL4P	Ensembl	1125	chr10	+	62444040	62445165		GACCAGAACACAGTTGTAGAAATTTGACCTGAAGTTAGTGAAATAAAACTCTAAAGAGTG
ASHG19A3L0001169	279.841	238.024	8.04385	7.97596	noncoding	chr2:238194611-238205061-	lincRNA-COPS8-2	lincRNA	10451	chr2	-	238194611	238205061		AATTTCTCTCACCTACTTGTATGGTGTCTGGAATGTCTTTCTCCTGTGTTCGCATTATCT
ASHG19A3L0001395	54.7843	78.3677	5.68939	6.37123	noncoding	EU831898	lincRNA-RPL29	lincRNA	3142	chr3	-	51965892	52258329	NM_017442,	CAAAACCCTCTTTGAGAACCTGTGGGCCTCGGTCTATGGCAGCCGCAAGACGCTGTTTGT
ASHG19A3A044163	114.774	104.85	6.76575	6.78913	noncoding	ENST00000429250	RP11-90J7.3	Ensembl	607	chr10	+	80008496	80310446		GGGAGTCCAGCTTTCAACAAAGCCAATCTATTCAATCTCCAGACTACCCTTTGTACCAAG
ASHG19A3A039321	182.008	321.503	7.42344	8.41786	noncoding	uc004bxu.2	BC094873	UCSC_knowngene	1213	chr9	+	132105694	132106907		GCAGAACCAGGTGACTGCACTGCTGTAGACCCACCAGCGGCATTGAAAAAACCCTCACCA
ASHG19A3L0000078	2198.76	2199.93	11.0092	11.1949	noncoding	AA224517	lincRNA-TLR5	lincRNA	553	chr1	+	223189224	223189783		CTGGAAGAAGAGATCTCTCCCCTGGTCTTTGGTCTCTGCTGTCTCTCTCTGTTTGTCTCG
ASHG19A3A054827	24773	21378.8	14.53	14.4633	noncoding	AK095707		misc_RNA	2984	chr16	+	81421429	81424413		CCATCATGCTGTTCTCTTGTACCAAGGATCAGTGAAAGTGTTTTATCTTTTTTATGTAGT
ASHG19A3A034427	68.3522	70.6205	6.01676	6.2209	noncoding	uc003tsv.2	BC042811	UCSC_knowngene	635	chr7	+	63361200	63378370		GTATTCTGATGGAAAAGCGTGGAGTTTAGAAGCACTGCTCACTCCTTCAGTTTCTAACAA
ASHG19A3L0001050	4952.72	5494.88	12.1941	12.5085	noncoding	exon2236+	lincRNA-GLI2-4	lincRNA	466	chr2	+	121156152	121156617		ATCCCCCTCCCCATCAGCAAGGGTGCAATGCTGGGGCACTCAGAGACGTGAACCCCTTGA
ASHG19A3A047770	188.227	175.876	7.4717	7.54466	noncoding	uc010ssu.1	BC043551	UCSC_knowngene	724	chr12	-	65938018	65951091		AGAAGTTGAGGCCAGTCTTTCTCCTCCGATCACCAAGTATCTATTAAAAGCCATTCCCTC
ASHG19A3L0001680	3000.02	3214.73	11.4627	11.7264	noncoding	exon2995-	lincRNA-TMEM174-2	lincRNA	180	chr5	-	72715548	72715727		TCGCCCTCCCCCGGGCCGCCCGCAAGAAGCCGCTCGCAGCCTCCATACACTTACTTGCCT
ASHG19A3L0002329	859.222	851.082	9.65692	9.82185	noncoding	BX105843	lincRNA-VCX	lincRNA	455	chrX	+	7528561	7529016		ATGTTAAAAACAGATGAAAATGGCTGTCTTCCAAGTCCAGCTATGAACCTCCCCACGGGA
ASHG19A3A024439	297.584	273.273	8.13169	8.18031	noncoding	uc010ikd.1	BC005018	UCSC_knowngene	737	chr4	-	84717589	85205479		AAGAAAGAACTTGCTGCCTCTTGCTCAGTTTCTTCCTGGAGCTTTCAAGCATCTTTGCAG
ASHG19A3A000412	3368.51	2727.48	11.6396	11.4996	noncoding	ENST00000499326	AC022087.2	Ensembl	717	chr15	+	50647749	50648633		TGCTTGGATTACTGCCACCTCAGAGGGGCGTCTGGGCATGGCTTTCCCAACCTAGTAACT
ASHG19A3A028300	185.666	116.151	7.45384	6.93949	noncoding	ENST00000515077	CTD-2187J20.1	Ensembl	509	chr5	+	66563849	66566010		GTGTAAATAGATGCTTGACCTTCATCCTGCCATTCATCCATATGGACCCTAAACGCTCTC
ASHG19A3L0003045	63.8568	75.3849	5.91827	6.31475	noncoding	chr14:93595225-93603463+	lincRNA-MOAP1	lincRNA	8239	chr14	+	93595225	93603463		CTCCTGAGGAGGTATACAGCAGTCCATGCAGCCTTGGGTCCAGTTTGTCTTTTTGGCTGG
ASHG19A3L0002378	144.426	204.632	7.08889	7.76225	noncoding	CR622249	lincRNA-C1orf59	lincRNA	1585	chr1	+	109102710	109187522	NM_001010883,	TAAGGCTATTTGTGGGTCCTGGGGGAAGTACAACCTTTGGCAGTCATCATCTTCCAAATA
ASHG19A3L0002700	397.657	280.897	8.54476	8.22062	noncoding	CA421426	lincRNA-IRX5	lincRNA	632	chr16	-	54966415	54988574		TTATCTTCAACACATGGCTTCCAAGTGGCTGGGTTCCTCTGCAGCAAGCTTTCTTCAATT
ASHG19A3L0000077	132.332	135.17	6.96643	7.1605	noncoding	DA731060	lincRNA-DISP1	lincRNA	780	chr1	-	223190516	223203156		AAAGCCCCTTGGCTTTTCACAGAAGACTGACCACTTTTCTCAGCCATGACCCTTTGCCTG
ASHG19A3A042726	139.345	82.1571	7.03934	6.43601	noncoding	uc001jef.2	LOC643650	UCSC_knowngene	2876	chr10	-	47096454	47151400		TCTTAACAGCTGAGCAGTCTGTTTCTCCAATCAGGTTTCAAAGCCACTTCAACTGCACTG
ASHG19A3A031816	10517.6	10805	13.2907	13.4719	noncoding	ENST00000401460	RP1-72A23.3	Ensembl	267	chr6	+	89711266	89711533		AAGCAGAAAAAGGCAAATGAGAAGGAGAAACCCAAGTAGCTTTGTGGCTTCATGCGCAAC
ASHG19A3L0000711	188.102	258.112	7.47028	8.09526	noncoding	chr14:25152560-25164885-	lincRNA-GZMB	lincRNA	12326	chr14	-	25152560	25164885		GTCTTCCCTCTTCGGAGAGACAATGTGTCTCCACTTCACATATTTGGATACATGAAATAA
ASHG19A3A028203	3988.67	3169.7	11.8833	11.7031	noncoding	ENST00000477321	RP11-289K10.1	Ensembl	437	chr5	+	52709333	52710090		CCACAGCACAGCACCCGTACCTACAGGTGATGCTGGGGTTGACTCCATGACCAAGATCTA
ASHG19A3A025131	343.549	357.969	8.33256	8.57708	noncoding	ENST00000514392	RP11-478C6.3	Ensembl	1582	chr4	+	256521	258103		AAACTCTCAGACTTCAAATGGTCCTGCAACAGGAATATCGACCTATTTTCCCCCAATCTG
ASHG19A3A026890	207.607	313.072	7.61383	8.38042	noncoding	ENST00000503268	CTC-340D7.1	Ensembl	499	chr5	-	68128411	68257985		CTTCGACTTCTGACCTCTGGCCCTGTTTGAAAACCAACTCAAATCGTTTTTCTTTTTCAG
ASHG19A3A037845	67.2294	93.1167	5.99076	6.61389	noncoding	ENST00000425205	RP11-40H20.4	Ensembl	379	chr1	-	27555596	27560843		TTTTTCGCCGTCGAGGAGTTCCTGCAGAGCGGGCTCACCCCGCCCGGTTGCCATTAGTTA
ASHG19A3L0003158	573.179	889.718	9.06513	9.88204	noncoding	AW675401	lincRNA-GFRA2-4	lincRNA	120	chr8	+	21211954	21211989		CAGATACATGTTGGTAAATGCTAACTGTCCATATTCACATAGAGACACAGTGTACTTTTT
ASHG19A3L0000696	118.578	90.6294	6.81142	6.57079	noncoding	AI902205	lincRNA-OXGR1-2	lincRNA	448	chr13	-	97778688	97779138		ATTCTTACTGCCATGTAATAGAAATAGCAACCTCTCACTTGTAGGGCCCCTGTCTGCTTC
ASHG19A3L0001818	143.205	94.8971	7.07655	6.64027	noncoding	chr6:63073666-63086291+	lincRNA-LGSN	lincRNA	12626	chr6	+	63073666	63086291		GAGGTTGAAATTGTTGATTTTCTCTTTCACGTCTTTCCCTTTGTCTCAAATATCCTACGT
ASHG19A3L0001728	60.8458	77.0718	5.84318	6.34837	noncoding	DA969401	lincRNA-AKAP7	lincRNA	564	chr6	-	131675289	131764931		AAACACAGAAAGAGGAAAGTAAAAAGTACCCAGGGAGCCTCTGAGTTTGTGTGTGCACGT
ASHG19A3L0002216	176.959	257.956	7.38342	8.09451	noncoding	BG427746	lincRNA-VLDLR-2	lincRNA	882	chr9	-	2704036	2704737		ATAACAACAATCATGGCGGAATATCCCCAAGATCCCCCTTAAAAAAGCTGCCCGGCATAA
ASHG19A3A000338	92.632	93.2648	6.45963	6.61565	noncoding	ENST00000452612	RP3-477H23.3	Ensembl	746	chr22	+	28315478	28395464		CTTCAAGAGCACAGTCTTATGTAAGCATGACCCATCTGCCTGGCACCAGCACCTGGGGCT
ASHG19A3L0000772	188.297	195.184	7.47212	7.69063	noncoding	BG185474	lincRNA-VASH1	lincRNA	557	chr14	+	77079544	77159888		TGTCATCCTTGTAGCTTTTAGGTAGCTCCTAGTATTCTTGCCCTGTAGCATCCTCTTCAG
ASHG19A3L0000884	86.6987	87.7147	6.35797	6.52503	noncoding	DB306154	lincRNA-MPHOSPH6	lincRNA	518	chr16	+	82168957	82169475		GAGCTCCCACTAAATTATTGCTTTTCAAATTCTTTTTGGTTACCATTGGTTCACATGTAC
ASHG19A3L0000705	734.425	615.989	9.42926	9.35543	noncoding	exon1607+	lincRNA-PPP2R5C-2	lincRNA	191	chr14	+	102051986	102052176		CACTTTCCCCATCCAAGCAATTCCATCTCTTTCCTCTTTCAGTGGCAGACTCTAACTGCT
ASHG19A3L0002312	75.2318	83.7654	6.1542	6.4623	noncoding	BX105648	lincRNA-ZNF182	lincRNA	503	chrX	+	47705501	47861961		AGCCCCACATCAGAGCTGTTCAGGGATTTCCACATATTTCGTCACATCCACAGTAAAAAA
ASHG19A3L0002524	122.742	156.63	6.86226	7.37575	noncoding	chr12:114662611-114678879+	lincRNA-TBX5-3	lincRNA	16269	chr12	+	114662611	114678879		TTAAGATGATAGTGTTTTGTACAGAATGCCCCCAAATGTCAGGCAGCCATTTCATCCGGC
ASHG19A3L0001619	98.4783	92.2119	6.5505	6.59778	noncoding	chr5:171991045-172004045-	lincRNA-SH3PXD2B	lincRNA	13001	chr5	-	171991045	172004045		TTTGCTTGTTTATTTGGCTTATAACCTTCTGGGATGTTCATCTGCTGGCTCTGTTCCCCC
ASHG19A3A049135	682.71	564.462	9.32415	9.23343	noncoding	AK096174		misc_RNA	2220	chr12	+	122232715	122234935		AGTGCTAAAAGTTCCCGTCACAAAAGCCAGACTCAGCAACAGCTCAAAACATTATTGTCC
ASHG19A3L0002011	856.171	1088.96	9.65241	10.175	noncoding	T19937	lincRNA-LRRC6	lincRNA	209	chr8	-	133695859	133696068		ATTTTGTGTTAGAGATACTCTATGCAGAAGAACCTGAAGGCTTGGTCTCCTCCCACTGAG
ASHG19A3L0002920	134.217	112.675	6.98581	6.89569	noncoding	DA758158	lincRNA-ACSS3	lincRNA	535	chr12	+	81331593	81528900		GATGTATACCATGTTGGCATGTGCAAGGATAGGTGCCATCCACAGTCTCATATTTGGTAG
ASHG19A3L0001215	326.576	243.194	8.26583	8.00899	noncoding	CD511325	lincRNA-NAT8B	lincRNA	784	chr2	-	73937844	73938415		TTTTTTGGAAGGCAAAAAAGTTTTCCCCTTTTTTGTTTGCCCCCAAGGCCCGGGGAAATG
ASHG19A3L0001782	309.628	458.537	8.18893	8.93552	noncoding	AW072314	lincRNA-OR2J2	lincRNA	371	chr6	-	29191776	29258217		TTTATAAAGTCGCCATCTCCCATGTTAAGCCAGAGAGATCTGCTGTGAGTCTCATGTCTC
ASHG19A3L0002624	294.117	230.951	8.11481	7.9357	noncoding	N80091	lincRNA-SPATA8-3	lincRNA	436	chr15	+	96886179	96888182		AATATGTCGGCGAGCACCCACCCAAATGCAATCATTTGACCCCCTGCGGACGATAGCTGC
ASHG19A3A023197	599.537	691.455	9.13204	9.52048	noncoding	uc001czf.2	AK055150	UCSC_knowngene	1123	chr1	+	59250822	59365384		TATTCTCCCACAAAATCCAGAGCTGCCAAACACATCCTCCTCCATGAGTCTTGCTTTGTG
ASHG19A3L0001075	168.933	212.213	7.31487	7.81519	noncoding	chr2:143440730-143546030-	lincRNA-LRP1B-1	lincRNA	105301	chr2	-	143440730	143546030		AAGGCACAAATCTTGAGTCCTATCAGCTTCAACTCCCATTTTGCCTTTTAAAAGCTCTAT
ASHG19A3A018131	209.06	188.19	7.62422	7.63793	noncoding	AK056943		misc_RNA	1856	chr20	+	23128722	23130576		TCCTTTACTTCCCCTCATTCTCAAATCCTATGGGGATGACACAGAGAACCACAAACAAAA
ASHG19A3A047897	93.3324	102.891	6.46955	6.76114	noncoding	ENST00000505974	AC025261.1	Ensembl	2685	chr12	-	94185691	94370048		AACAAAAAGTTAAGTGAAAAAATTCAACCAGTCTGGGCCACCATACAGCCTTGTCTGGAA
ASHG19A3A014683	120.272	109.34	6.83077	6.85139	noncoding	uc002ulk.1	DKFZp451M2119	UCSC_knowngene	1187	chr2	-	178186339	178257419		GGTAGCCTAAACTCTTTCCCCAATTTTTGATATCACTTCATGTCATTTTAGAGAGTAAGT
ASHG19A3L0002138	61.6407	88.5924	5.86288	6.5397	noncoding	BX110722	lincRNA-SGK223-2	lincRNA	397	chr8	-	8413247	8418475		TTTAATTGGTGGCTTTACTCAGCCATGTTTCTGTTTTTCAAACCCCGGAGTCAGTTGGAC
ASHG19A3A033330	8608.88	5556.22	13.0008	12.5248	noncoding	uc003vcj.1	CR591034	UCSC_knowngene	2178	chr7	-	104622195	104624373		GCTCTTGGATATGAGGGTTGGGTGAGTTCCTCTTTTTCTCTTTTAAAATATATGTATGTT
ASHG19A3A011299	110.641	148.18	6.71542	7.29395	noncoding	AK022299		misc_RNA	1880	chr19	-	28266664	28268543		GAAGAAATACAACAGCAACTCACTGTAAGTACTGTAGAAACAAACTGAAAGTTGGGTTAG
ASHG19A3L0000918	200.077	214.956	7.55786	7.83293	noncoding	AL709726	lincRNA-TAC4	lincRNA	477	chr17	-	47939081	47939558		TAAATTCTAAGAGGACCCAAGGGCTGAGGTCATCACGAGCACCTCCCTGGGCAGAGGGTT
ASHG19A3A029873	790.488	732.218	9.53829	9.60471	noncoding	ENST00000373171	RP11-552E20.3	Ensembl	554	chr6	-	40312082	40313890	uc003opf.1,	TCTAGGCCCTCTGATCCCTCTGTAAGTCGCTATTTCCCTTATTAAATCTCTTTCTGCTGG
ASHG19A3L0000137	2424.99	1773.13	11.1528	10.8827	noncoding	exon92-	lincRNA-DMBX1	lincRNA	197	chr1	-	46992321	46992517		GGGCAAAGGACAGCATAGTCCCTCCCCAGGGCACACTGACCAACTTAATTTCTGCCATCC
ASHG19A3L0002257	193.14	216.364	7.50985	7.84234	noncoding	DR159293	lincRNA-DCAF12L2-2	lincRNA	722	chrX	+	124517281	124517962		GCCTATGCTTTTTCTGCTTCCCTCTGCTTAGTTCTGACAGGGTAAACACAAAGGAAAAAA
ASHG19A3A052661	164.061	143.408	7.27609	7.24393	noncoding	NR_023915	IPW	RefSeq_NR	4498	chr15	+	25361691	25367621		GGAAGCAAAACTGTCCATGCCCTTGCCTTAACTTTCAGATACGATAAAAACAACATTTAT
ASHG19A3L0003131	109.303	110.383	6.69919	6.86386	noncoding	BF680399	lincRNA-USP54	lincRNA	466	chr10	-	75383004	75383659		AAAGTATGAGACAAGGTTCTGCCCCTGAAGAGTTTATATAGTAGTTGACAGGACAAAGAA
ASHG19A3L0002933	94.0079	186.941	6.48008	7.62888	noncoding	BX956284	lincRNA-MYO1B-2	lincRNA	566	chr2	-	192295237	192295802		AGTATTAAAAAAGCCAAACAAAGATACCAACTCCACTTCTGGCACCATCTGGCCTCATCT
ASHG19A3A053421	1360.23	1212.05	10.3229	10.3305	noncoding	uc002cuc.2	BC013599	UCSC_knowngene	1114	chr16	-	3178836	3182043		TAGATGTGATCCAGCTCAGTATCACAAAGCAGAACGAAAAGGATGTGTTTGGGCTGAGAG
ASHG19A3L0000334	86.0922	91.6175	6.34778	6.58845	noncoding	DA800392	lincRNA-CDON-1	lincRNA	445	chr11	-	126057380	126057825		AGGCCAAGAATTCTCCTAACAGGGCCTGGCTCCAAAAGATGACAGGCCGCCCATCATCTG
ASHG19A3L0001161	69.2446	113.587	6.03525	6.90657	noncoding	BE092230	lincRNA-ARL4C-1	lincRNA	346	chr2	-	235440518	235440864		TAAGAGCTAGCAACTGTACGTGAACCCTGGGCTACTAATTGCTCATCAGACTCCTCTAAA
ASHG19A3L0001724	86.7121	100.474	6.35818	6.72488	noncoding	chr6:130910607-130926232-	lincRNA-TMEM200A-3	lincRNA	15626	chr6	-	130910607	130926232		CCACTGAAAAATGCATGAACACTTGTTGTTAGTTCCATTGTGTTGTTGCTCCTTTGATAA
ASHG19A3A011301	571.145	489.533	9.05961	9.03298	noncoding	NR_027301	LOC148189	RefSeq_NR	2085	chr19	-	28281401	28284848		AAGCTGGGTGCAGATAAGAGACTACAGCTCCCCGCATCCCAAGCAAAGGTCCCTCCTCTA
ASHG19A3L0003481	289.318	171.578	8.09296	7.50638	noncoding	BX114959	lincRNA-OLA1-2	lincRNA	745	chr2	+	174833079	174833824		TAGCCATTCAGTATTAAAAAGTGATGGCCCTGGTTGACGGTACCACACCTGAAGACCTAT
ASHG19A3A046586	589.4	649.07	9.10682	9.43316	noncoding	uc001czt.1	AK097193	UCSC_knowngene	2344	chr1	-	61125302	61291256		ATATCTGGGTTTTCTTCTCTTTTCTCCAGCCTCTGCCTCTGAATGTGAAGGGAAACTGGA
ASHG19A3A014420	143.41	172.343	7.07865	7.51306	noncoding	ENST00000427150	AC097721.1	Ensembl	1253	chr2	-	139169635	139170888		TGGGCTGTTTCATGCTGTGGATGTTAATGGAGATATTTGGGAAGATGGGATTGAAGACTA
ASHG19A3A042725	4801.08	4367.77	12.155	12.1668	noncoding	ENST00000421426	RP11-314P12.3	Ensembl	561	chr10	-	47133337	47133898	ENST00000404243,	TGACTGAAATCATGACTGACCGAGTCAGTGGCTAGAAAAGGGGCTTTGCCTTTGTAACTT
ASHG19A3A025299	180.388	156.678	7.40987	7.37608	noncoding	NR_003132	HSP90AB2P	RefSeq_NR	4889	chr4	+	13335036	13339924		TGCCTGTGTGTTGGAGAGCCAGCCTACCTTGCTCTTTAATACGTGTAAGCCTTTTCTTTT
