# Supplementary material for: The Role of PinX1 in Growth Control of Breast Cancer Cells and Its Potential Molecular Mechanism by mRNA and lncRNA Expression Profiles Screening
Source: Biomed Res Int. 2014 Feb 3;2014:978984. doi: 10.1155/2014/978984 (PMC3929369; doi:10.1155/2014/978984)
Supplement: Supplementary file 1 — Human LncRNA Array V2.0 was applied for screening the alterations of lncRNA and mRNA expression profile between PinX1 overexpressed and control MCF-7 cells. After the quantile normalization and data filtering steps, the mRNA expression profile data qualified for fold-change comparison was listed in Tables S1, and lncRNA expression profile data was listed in Table S2. The differentially expressed mRNAs was listed in Tables S3 and differentially expressed lncRNAs was listed in Tables S4. GO analysis of the differentially expressed mRNAs by biological processes, cellular components and molecular functions was showed in Table S5. Profiling data of enhancer-like lncRNAs was listed in Table S6. The enhancer-like lncRNAs and their adjacent coding gene pairs was listed in Table S7. Profiling data of the Rinn lincRNAs was listed in Table S8. The Rinn lincRNAs and their adjacent coding gene pairs was listed in Table S9. Profiling data of the Hox clusters was listed in Table S10. [file 978984.f1.zip › 978984.f1/Table S9.xls]

## Sheet: lincRNAs nearby coding gene
# Condition pairs: pcDNA3.1-PinX1 vs Empty Vector # Fold Change cut-off: 2.0 This table contains the differentially expressed lincRNA and nearby coding gene pairs (distance < 300 kb). # Column A: seqname, the sequence identifier. # Column B: GeneSymbol, the symbol of the LncRNA. # Column C: Fold change - LncRNAs, the ratio of normalized intensities between two samples, positive value indicates up…
seqname	GeneSymbol	Fold change - LncRNAs	Log Fold change - LncRNAs	Absolute Fold change - LncRNAs	Regulation - LncRNAs	source	RNAlength	Chrom	Strand	txStart	txEnd	GenomeRelationship	NearbyGene	NearbyGeneSymbol	NearbyProteinName	Fold change - mRNAs	Log Fold change - mRNAs	Absolute Fold change - mRNAs	Regulation - mRNAs	NearbyGeneChrom	NearbyGeneStrand	NearbyGenetxStart	NearbyGenetxEnd
ENST00000446763	AL035422.2	-4.57923	-2.1951	4.57923	down	Ensembl	403	chrX	+	100673285	100701120	upstream	NM_000169	GLA	alpha-galactosidase A precursor	-2.6468	-1.40425	2.6468	down	chrX	-	100652778	100663001
ENST00000480386	RP11-357H14.4	2.62512	1.39238	2.62512	up	Ensembl	566	chr17	+	46706036	46712294	upstream	NM_001075099	SKAP1	src kinase-associated phosphoprotein 1 isoform	-2.09242	-1.06517	2.09242	down	chr17	-	46210801	46507594
ENST00000431395	RP11-124O11.2	-3.22426	-1.68897	3.22426	down	Ensembl	500	chr10	-	43474464	43476955	upstream	NM_020975	RET	proto-oncogene tyrosine-protein kinase receptor	-2.14956	-1.10404	2.14956	down	chr10	+	43572516	43625797
uc002ivh.1	AK126318	-5.93757	-2.56987	5.93757	down	UCSC_knowngene	4722	chr17	-	56066404	56072211	downstream	NM_017949	CUEDC1	CUE domain-containing protein 1	-2.08131	-1.0575	2.08131	down	chr17	-	55940336	55980750
DA444159	lincRNA-SLCO2A1	-2.01017	-1.00732	2.01017	down	lincRNA	593	chr3	-	133847907	133877108	overlap	NM_001005861	RYK	tyrosine-protein kinase RYK isoform 1	-2.18135	-1.12522	2.18135	down	chr3	-	133875977	133969586
AK021484	lincRNA-SYNPO2	8.85309	3.14618	8.85309	up	lincRNA	3422	chr4	+	119672345	119956974	overlap	NM_001128933	SYNPO2	synaptopodin-2 isoform b	3.30652	1.72531	3.30652	up	chr4	+	119809995	119959669
chr2:238206264-238224402+	lincRNA-COL6A3-4	3.87588	1.95452	3.87588	up	lincRNA	18139	chr2	+	238206264	238224402	downstream	NM_001042467	MLPH	melanophilin isoform 2	-3.26317	-1.70628	3.26317	down	chr2	+	238395877	238463961
chr2:238206264-238224402+	lincRNA-COL6A3-4	3.87588	1.95452	3.87588	up	lincRNA	18139	chr2	+	238206264	238224402	downstream	NM_024101	MLPH	melanophilin isoform 1	-5.25012	-2.39235	5.25012	down	chr2	+	238395877	238463961
AK097728	lincRNA-PRLHR-1	2.01944	1.01396	2.01944	up	lincRNA	1798	chr10	-	120433633	120514558	overlap	NM_153810	C10orf46	chromosome 10 open reading frame 46	2.13461	1.09397	2.13461	up	chr10	-	120440493	120514758
AK296158	lincRNA-TMEM30B-1	-2.33622	-1.22417	2.33622	down	lincRNA	1756	chr14	+	61654286	62016579	downstream	NM_181054	HIF1A	hypoxia-inducible factor 1-alpha isoform 2	-2.18712	-1.12903	2.18712	down	chr14	+	62162118	62214977
BC036853	lincRNA-PDCD1LG2-2	2.2231	1.15257	2.2231	up	lincRNA	1660	chr9	-	5357968	5630071	downstream	NM_134441	RLN2	prorelaxin H2 isoform 1 preproprotein	-2.27847	-1.18807	2.27847	down	chr9	-	5299867	5304580
DQ269985	lincRNA-AKR1C3-2	-4.53982	-2.18264	4.53982	down	lincRNA	972	chr10	+	5005636	5149693	overlap	NM_003739	AKR1C3	aldo-keto reductase family 1 member C3	-5.05005	-2.3363	5.05005	down	chr10	+	5136567	5149878
AK125369		-2.36094	-1.23936	2.36094	down	NRED	3146	chr2	+	217081767	217084913	upstream	NM_021141	XRCC5	X-ray repair cross-complementing protein 5	-2.10737	-1.07544	2.10737	down	chr2	+	216974019	217071016
NR_027109	LOC285593	-3.62113	-1.85644	3.62113	down	RefSeq_NR	1412	chr5	+	173006656	173008612	upstream	NM_003714	STC2	stanniocalcin-2 precursor	-4.36549	-2.12614	4.36549	down	chr5	-	172741725	172756506
DQ269985	lincRNA-AKR1C3-2	-4.53982	-2.18264	4.53982	down	lincRNA	972	chr10	+	5005636	5149693	overlap	NM_001353	AKR1C1	aldo-keto reductase family 1 member C1	-3.8853	-1.95803	3.8853	down	chr10	+	5005453	5020158
DQ269985	lincRNA-AKR1C3-2	-4.53982	-2.18264	4.53982	down	lincRNA	972	chr10	+	5005636	5149693	downstream	NM_001818	AKR1C4	aldo-keto reductase family 1 member C4	-4.34093	-2.11801	4.34093	down	chr10	+	5238797	5260910
ENST00000457638	AC093106.4	2.1947	1.13402	2.1947	up	Ensembl	1053	chr7	+	131350338	131812561	downstream	NM_001105543	PLXNA4	plexin-A4 isoform 3	5.23842	2.38913	5.23842	up	chr7	-	132068246	132261323
AJ493605	lincRNA-C3orf35	-2.70914	-1.43784	2.70914	down	lincRNA	981	chr3	+	37427759	37459039	upstream	NM_017724	LRRFIP2	leucine-rich repeat flightless-interacting	-3.10565	-1.6349	3.10565	down	chr3	-	37094116	37217851
AK054953		-3.7285	-1.8986	3.7285	down	misc_RNA	2228	chr3	+	160981722	160983945	upstream	NM_015938	NMD3	60S ribosomal export protein NMD3	-2.88191	-1.52703	2.88191	down	chr3	+	160939098	160969795
AK021484	lincRNA-SYNPO2	8.85309	3.14618	8.85309	up	lincRNA	3422	chr4	+	119672345	119956974	overlap	NM_133477	SYNPO2	synaptopodin-2 isoform a	14.1839	3.82618	14.1839	up	chr4	+	119809995	119982402
BG898852	lincRNA-RAB3IP	-6.16753	-2.62469	6.16753	down	lincRNA	605	chr12	-	70474248	70474753	upstream	NM_014505	KCNMB4	calcium-activated potassium channel subunit	-2.36603	-1.24247	2.36603	down	chr12	+	70760061	70824978
AK021484	lincRNA-SYNPO2	8.85309	3.14618	8.85309	up	lincRNA	3422	chr4	+	119672345	119956974	overlap	NM_001128934	SYNPO2	synaptopodin-2 isoform c	6.0104	2.58746	6.0104	up	chr4	+	119809995	119959669
BF850330	lincRNA-MESDC2	2.79394	1.4823	2.79394	up	lincRNA	177	chr15	+	81260381	81260482	upstream	NM_021214	FAM108C1	abhydrolase domain-containing protein FAM108C1	-2.73462	-1.45134	2.73462	down	chr15	+	80987651	81047962
BC009210	lincRNA-KIAA1199	-2.50999	-1.32768	2.50999	down	lincRNA	2959	chr15	-	81239669	81282169	downstream	NM_021214	FAM108C1	abhydrolase domain-containing protein FAM108C1	-2.73462	-1.45134	2.73462	down	chr15	+	80987651	81047962
AK296158	lincRNA-TMEM30B-1	-2.33622	-1.22417	2.33622	down	lincRNA	1756	chr14	+	61654286	62016579	downstream	NM_001530	HIF1A	hypoxia-inducible factor 1-alpha isoform 1	-2.20507	-1.14082	2.20507	down	chr14	+	62162118	62214977
