# Supplementary material for: The Role of PinX1 in Growth Control of Breast Cancer Cells and Its Potential Molecular Mechanism by mRNA and lncRNA Expression Profiles Screening
Source: Biomed Res Int. 2014 Feb 3;2014:978984. doi: 10.1155/2014/978984 (PMC3929369; doi:10.1155/2014/978984)
Supplement: Supplementary file 1 — Human LncRNA Array V2.0 was applied for screening the alterations of lncRNA and mRNA expression profile between PinX1 overexpressed and control MCF-7 cells. After the quantile normalization and data filtering steps, the mRNA expression profile data qualified for fold-change comparison was listed in Tables S1, and lncRNA expression profile data was listed in Table S2. The differentially expressed mRNAs was listed in Tables S3 and differentially expressed lncRNAs was listed in Tables S4. GO analysis of the differentially expressed mRNAs by biological processes, cellular components and molecular functions was showed in Table S5. Profiling data of enhancer-like lncRNAs was listed in Table S6. The enhancer-like lncRNAs and their adjacent coding gene pairs was listed in Table S7. Profiling data of the Rinn lincRNAs was listed in Table S8. The Rinn lincRNAs and their adjacent coding gene pairs was listed in Table S9. Profiling data of the Hox clusters was listed in Table S10. [file 978984.f1.zip › 978984.f1/Table S10.xls]

## Sheet: HOX cluster profiling
HOX cluster profiling (Entities where at least 2 out of 2 samples have flags in Present or Marginal). This table contains profiling data of all probes in the four HOX loci, targeting 407 discrete transcribed regions (Rinn, Kertesz et al. 2007), LncRNAs and coding transcripts. # Column A: ProbeName, it represents the probe name. # Column B ~ C: Raw Intensity of each sample. # Column D ~ E: Normali…
	Raw Intensity		Normalized Intensity		Annotations
ProbeName	[Empty Vector](raw)	[pcDNA3.1-PinX1](raw)	[Empty Vector](normalized)	[pcDNA3.1-PinX1](normalized)	type	seqname	GeneSymbol	source	RNAlength	chrom	strand	txStart	txEnd	Xhyb	probeSeq	EntrezID	unigene	GO	ProteinAccession	product
ASHG19A3H0000507	145.827	145.034	7.10437	7.26219	coding	NM_153693_intron1-	NM_153693	HOX cluster	11160	chr12	-	54411198	54422359		AGGATAAGGAAGGGTTAGTGAAGTAGGAATTCATCCCTTTGCCTTTACCTGGTCGGTCTA
CUST_48_PI426249100	81.5209	133.851	6.27109	7.14584	coding	NM_021193_Exon1+	NM_021193	HOX cluster	574	chr2	+	176964529	176965103	NM_021193,	AATCTGCAGTCGCCAGACTCTTTCTACTTCTCCAACCTGAGGCCGAATGGCGGCCAGTTG
CUST_38_PI426249100	165.18	195.394	7.28458	7.69255	coding	NM_004502_Exon1-	NM_004502	HOX cluster	503	chr17	-	46687880	46688383	NM_004502,	TTTCTAAATATCCAGCCTCAAGTTCGGTTTTCGCTACCGGAGCCTTCCCAGAACAAACTT
ASHG19A3A048663	120.411	162.019	6.83308	7.42461	coding	NM_004503	HOXC6	RefSeq_coding	1681	chr12	+	54422193	54424606		TAGACCGACCAGGTAAAGGCAAAGGGATGAATTCCTACTTCACTAACCCTTCCTTATCCT	3221	Hs.549040	GO:0043565|GO:0003700|GO:0030528|GO:0009952|GO:0051216|GO:0048562|GO:0007275|GO:0006355|GO:0006351|GO:0005634	NP_705897	Homeobox C4
CUST_15_PI426249100	198.972	226.593	7.54938	7.90625	coding	NM_018953_Exon1+	NM_018953	HOX cluster	529	chr12	+	54426831	54427360	uc.344+,NM_018953,	TATAAGCAGAGCCCCAATATCCCTGCCTATAACATGCAAACTTGTGGGAACTATGGATCG
CUST_50_PI426249100	394.955	426.607	8.53569	8.83204	coding	NM_021192_Exon1+	NM_021192	HOX cluster	781	chr2	+	176972083	176972864	NM_021192,	GTCTGACTTCGCTAGCAAGCCTTCGTTCCTTTCCCAACCGTCGTCCTGCCAGATGACTTT
CUST_17_PI426249100	9180.54	6232.6	13.0927	12.6825	coding	NM_014620_Exon2+	NM_014620	HOX cluster	117	chr12	+	54446943	54447060	NM_014620,	AGAAATGACGTCAGAATCATTTGCATCCCGCTGCCTCTACCTGCCTGGTCCAGCTGGGAC
ASHG19A3H0000526	98.978	101.718	6.55875	6.74182	coding	NM_006361_intron2+	NM_006361	HOX cluster	948	chr17	+	46804405	46805354		CCACCATCACATACGTCCAGTCTTCATGCATTTCCAGACTCTTGGCCACTCTTTTAGATT
ASHG19A3A048665	9285.89	5953.86	13.1091	12.6244	coding	NM_014620	HOXC4	RefSeq_coding	2300	chr12	+	54410641	54449813		AGAAATGACGTCAGAATCATTTGCATCCCGCTGCCTCTACCTGCCTGGTCCAGCTGGGAC	3221	Hs.549040	GO:0043565|GO:0003700|GO:0030528|GO:0009952|GO:0051216|GO:0048562|GO:0007275|GO:0006355|GO:0006351|GO:0005634	NP_705897	Homeobox C4
ASHG19A3H0000512	323.801	335.645	8.25189	8.47991	coding	NM_002144_intron2+	NM_002144	HOX cluster	451	chr17	+	46607237	46607689		CTCCCGGGGCTGGCTCTGGACCTCCATTTGCCATTCTGCCCAAGTACAGTTGTCAAAGTT
CUST_11_PI426247286	9142.55	10238.1	13.0865	13.3918	coding	NM_014620_intron3+	NM_014620	HOX cluster	487	chr12	+	54448145	54448633		TTTAAGCTTGATGACTTTATTTCCACCACTCCCTCCTCCTGTTTCTCAGAGCTGAGGATG
CUST_57_PI426249100	199.456	182.341	7.55361	7.59425	coding	NM_019558_Exon2+	NM_019558	HOX cluster	682	chr2	+	176996044	176996726	NM_019558,	TCTGAGCTAGTGATTTGCCTCAACAACGTAAACTTCCTAATGATTAGCACTTAATAATTG
CUST_28_PI426247286	131.061	156.757	6.95371	7.37678	coding	NM_021193_intron1+	NM_021193	HOX cluster	145	chr2	+	176965103	176965249		TGGGGGCGGGCAATAGACAGAGTACGGGCTGGGTTGACGTGGGTTGGGGCTGTGTTGCAG
ASHG19A3H0000591	104.423	92.6267	6.63283	6.60475	coding	NM_004502_Exon1+	NM_004502	HOX cluster	503	chr17	+	46687880	46688383		AAGTTTGTTCTGGGAAGGCTCCGGTAGCGAAAACCGAACTTGAGGCTGGATATTTAGAAA
CUST_64_PI426249100	196.489	273.171	7.53474	8.17928	coding	NM_153620_Exon3-	NM_153620	HOX cluster	1799	chr7	-	27132615	27134414	NM_153620,NM_005522,	AACCTTTTCACCTCCAACTGGATGTTGACGTATATATAAACAGAACTCCCTTCAAAAGCC
CUST_31_PI426249100	189.558	67.2776	7.48145	6.15066	coding	NM_002147_Exon2-	NM_002147	HOX cluster	1199	chr17	-	46668619	46669818	NM_002147,	TGATTCGCTTTTGGTATTTGTTTGTAGCTTTCCTGGAAGTCAAATAAATGTTTCCCCCAC
CUST_49_PI426247286	245.839	246.886	7.85543	8.03169	coding	NM_152739_intron2-	NM_152739	HOX cluster	1035	chr7	-	27203460	27204496		AAGTTTTACTGCGTGCAATTTTAAGTGACTGTCTGTGCGTCTGTCTGCCAGGGTTCCATT
ASHG19A3H0000643	258.716	237.287	7.93132	7.97107	coding	NM_005523_Exon2+	NM_005523	HOX cluster	1871	chr7	+	27220776	27222647	nc-HOXA10-82+,	ATTTCCACCGTCTTTATTTTCCTTGTGCCCAGTTGCCTGTATAAGTGCTGCAACACACAC
CUST_2_PI426247286	97.2847	97.2732	6.53308	6.67486	coding	NM_173860_intron1+	NM_173860	HOX cluster	787	chr12	+	54349323	54350111		AAAGAAATGCCAGTGGATGCGTTTACTCTGCCATTCGCCCATATCTGTTGTAACTGATCC
ASHG19A3H0000592	135.086	104.499	6.99422	6.78436	coding	NM_024016_Exon2+	NM_024016	HOX cluster	1163	chr17	+	46689708	46690871		TCTCGCTTGTAAACTTTATTGTAACTCTTCCGCCCTTTTCAGGCGCAGACAACAGAACAA
CUST_16_PI426249100	696.188	555.654	9.35452	9.21465	coding	NM_018953_Exon2+	NM_018953	HOX cluster	1081	chr12	+	54428061	54429142	NR_003084,NM_018953,	TGACTCTGGGTCCTTCCTGAAACTATATTTTGTCATATCAAATAAAGAGAGAACAGGACT
ASHG19A3H0000623	6856.91	6719.21	12.661	12.793	coding	NM_153631_Exon4+	NM_153631	HOX cluster	2530	chr7	+	27145809	27148339		AATTTATAAAATTGCAGTTTTATTACAAAGATACCGATCTCCTTGCTCTCTCCCCCTCCC
CUST_51_PI426247286	466.713	463.573	8.77256	8.95191	coding	NM_153715_intron2-	NM_153715	HOX cluster	7471	chr7	-	27211792	27219264	NM_018951,	AAATGTCAGCCAGAAAGGGCTATCTGCTCCCTTCGCCAAATTATCCCACAACAATGTCAT
ASHG19A3H0000624	255.617	239.912	7.91657	7.9877	coding	NM_153631_Exon3+	NM_153631	HOX cluster	646	chr7	+	27149733	27150379		TGGAGCTGCTGGTTTTCTGCTTTGTGTTTTGTCGAGACTCTTTCATCCAGGGGAAGATTT
CUST_65_PI426249100	1161.62	1175.78	10.0989	10.2867	coding	NM_153620_Exon2-	NM_153620	HOX cluster	95	chr7	-	27134879	27134974	NM_153620,NM_005522,	CATCTTCTCCAGCGCAGACTTTTGACTGGATGAAAGTCAAAAGAAACCCTCCCAAAACAG
ASHG19A3H0000509	27648.4	32550.8	14.6896	15.0395	coding	NM_018953_intron1-	NM_018953	HOX cluster	700	chr12	-	54427360	54428061		AACTCCCTCCCTCTCCCCCAAAAATTGAATATTGCCTTTTATACACGTTTTGTTCCTATG
CUST_34_PI426249100	61.9356	112.504	5.87137	6.89358	coding	NM_018952_Exon3-	NM_018952	HOX cluster	493	chr17	-	46675097	46675590	NM_018952,	AAGAGCAGAAGTGCTCCACTCCGGTCTACCCGTGGATGCAGCGGATGAATTCGTGCAACA
ASHG19A3H0000544	212.911	256.734	7.6523	8.08835	coding	NM_153631_intron2+	NM_153631	HOX cluster	4242	chr7	+	27162261	27166504	ENST00000297027,	TGTGGCGCACTCATTGCTCGAAATGTTCCAGTCTACAAATGGTCCGAAGATGGTGATTTA
CUST_91_PI426249100	835.291	1059.61	9.61614	10.1321	coding	NM_005523_Exon1-	NM_005523	HOX cluster	781	chr7	-	27224054	27224835	NM_005523,	TATTTGCCAAGTTGTACTTACTACGTCTCGGGTCCAGATTTCTCCAGCCTCCCTTCTTTT
ASHG19A3H0000589	4425.3	5136.86	12.0371	12.4065	coding	NM_018952_Exon1+	NM_018952	HOX cluster	111	chr17	+	46682223	46682334		CCCCCTCTCTCGTCCTCTCTCTCTTTTGCTCTATCGAGCTGATACTGAAGTACAAAAATA
CUST_37_PI426247286	190.981	137.242	7.49377	7.18207	coding	NM_153620_intron3-	NM_153620	HOX cluster	464	chr7	-	27134414	27134879		GGAATCTCAAGTCGATTTAAAAATTTTTACATTTCCGTCTCATGGCTTCCCACTTTGCCC
CUST_52_PI426247286	245.837	216.903	7.8554	7.8468	coding	NM_005523_intron2-	NM_005523	HOX cluster	1406	chr7	-	27222647	27224054		CCTCCTTCTGCCCAACTGCATGTTATTCACAATTGTTATTCAATCTGTCAAAAGCGATTT
CUST_11_PI426249100	2732.67	3716.48	11.3286	11.9406	coding	NM_153693_Exon1+	NM_153693	HOX cluster	557	chr12	+	54410641	54411198	NR_003084,NM_153693,NM_014620,	TTGAATTTATATAAAGTATATGTGTGTGTGTGTGGAGCTGAGACAGGCTCGGCAGCGGCA
ASHG19A3H0000559	424.251	304.342	8.63533	8.34174	coding	NM_014212_Exon2-	NM_014212	HOX cluster	1237	chr12	-	54368964	54370201		TTCCCTCCAGGTGGAAAGAAACGCTTGGGAAATTTATTTACAAAAATCCAGGCCCCAGCA
CUST_71_PI426249100	1031.75	1105.2	9.92834	10.1966	coding	NM_153631_Exon3-	NM_153631	HOX cluster	646	chr7	-	27149733	27150379	NM_153632,NM_153631,NM_030661,	AAATCTTCCCCTGGATGAAAGAGTCTCGACAAAACACAAAGCAGAAAACCAGCAGCTCCA
ASHG19A3H0000628	69.9043	93.505	6.04948	6.61921	coding	NM_153631_Exon2+	NM_153631	HOX cluster	84	chr7	+	27162177	27162261	uc003syl.2,ENST00000297027,	CTAGAAAGATGTTTAAATTCTGAACCAGGAATTGTCTCCAACTCCAGGCGCTCAGGGAAT
CUST_5_PI426249100	129.174	153.607	6.93412	7.34745	coding	NM_014212_Exon1+	NM_014212	HOX cluster	798	chr12	+	54366909	54367707	NM_014212,	AACAAGAACAGCGTCCTGCCTCAAGCCTTCGACCGTTTCTTCGACAACGCCTACTGCGGT
CUST_16_PI426247286	7167.02	6096.87	12.7293	12.655	coding	NM_002146_intron2-	NM_002146	HOX cluster	18217	chr17	-	46632980	46651198		CTCTTCCTCCCTGTCCCTCCAATCTAGATTTAAATTTTTACCTGTTCTTTAAGGAAAAAA
CUST_21_PI426247286	787.331	991.136	9.53228	10.038	coding	NM_018952_intron2-	NM_018952	HOX cluster	245	chr17	-	46681977	46682223		CCAGAACTTACTCCATTTTCTATGCAAATGTCAGAAAAATGAAACACCCTCTCTCCCAAG
ASHG19A3H0000612	104.042	99.0653	6.62795	6.70354	coding	NM_014621_Exon2-	NM_014621	HOX cluster	612	chr2	-	177017335	177017947		CATAAGTTTAATGACTCGCCAAGATTTTATGTTCTCAGTAGCTCCTGCCATATAATATAC
ASHG19A3H0000600	126.4	103.837	6.90322	6.77536	coding	NM_000523_Exon2-	NM_000523	HOX cluster	1459	chr2	-	176959207	176960666	nc-HOXD12-3+,	AAGAGTTCTGTTTATTGGCATCTCCCTAGGAGTAAAAAGTGATTTTTAAATGTCTGAAGC
ASHG19A3H0000562	131.82	93.1484	6.96125	6.6143	coding	NM_022658_Exon1-	NM_022658	HOX cluster	615	chr12	-	54402889	54403504		AAACATGAGGCTGGGAGACGAGTTTTGATTTAAGTGGCCTTGTCCTTCGCTACTGTTAGT
CUST_33_PI426249100	1249.6	1169.09	10.2009	10.2799	coding	NM_018952_Exon4-	NM_018952	HOX cluster	936	chr17	-	46673098	46674034	NM_018952,	ATTAATTTTCTATGTGTTGTGTTTGTAGTCTTGTCTTAGCTCTGGACGTGAAATACTTCG
CUST_15_PI426247286	97.7132	160.445	6.53992	7.4114	coding	NM_002146_intron3-	NM_002146	HOX cluster	2897	chr17	-	46629994	46632892		GAAAAAACCCTATTGATGTCAGTTCCCTTTTCAGTTCCTAAGATGGATTCGAGCCCCAGT
CUST_47_PI426247286	3546.52	4246.82	11.7189	12.1267	coding	NM_024014_intron2-	NM_024014	HOX cluster	1389	chr7	-	27185536	27186926		GAAAACATCTCGCTTGGTATGAAATAATCTCCCATTCAGTATGCTTTGGGCCCCAGACAT
CUST_9_PI426249100	479.039	537.232	8.8105	9.16577	coding	NM_022658_Exon1+	NM_022658	HOX cluster	615	chr12	+	54402889	54403504	NM_022658,	ACTAACAGTAGCGAAGGACAAGGCCACTTAAATCAAAACTCGTCTCCCAGCCTCATGTTT
CUST_35_PI426247286	88.3511	66.4145	6.38753	6.13253	coding	NM_006898_intron2+	NM_006898	HOX cluster	1860	chr2	+	177034383	177036244		TAGTAAAAGCCAGTGTTGAGGCTGCTGCTCCTAGCACTGTGAATACTCAAAATGCTTCCA
ASHG19A3A048657	80.612	110.362	6.25386	6.86356	coding	NM_173860	HOXC12	RefSeq_coding	849	chr12	+	54348713	54350348		AGAACCGGAGAATGAAAAAGAAAAGACTTCTGTTGAGGGAGCAAGCTCTCTCCTTCTTTT	3228	Hs.381267	GO:0043565|GO:0003700|GO:0030528|GO:0007275|GO:0006355|GO:0005634	NP_776272	Homeobox C12
ASHG19A3A008506	138.111	149.155	7.0262	7.30517	coding	NM_024015	HOXB4	RefSeq_coding	2042	chr17	-	46652869	46655743		TTTGATCAACTCAAACTATGTCGACCCCAAGTTCCCTCCATGCGAGGAATATTCACAGAG	3214	Hs.664706	GO:0043565|GO:0003700|GO:0016564|GO:0009952|GO:0048539|GO:0008283|GO:0060216|GO:0048704|GO:0002011|GO:0007275|GO:0000122|GO:0006355|GO:0048103|GO:0048536|GO:0006351|GO:0005634	NP_076920	Homeobox B4
ASHG19A3H0000513	163.654	158.858	7.2724	7.39618	coding	NM_002145_intron2+	NM_002145	HOX cluster	772	chr17	+	46621109	46621882		TCTGAATTCTTCCTCTTCTCCTAGAGTTGGGGCAGAAAGGACCGAATCTTTTCTGCTTCT
ASHG19A3H0000501	112.611	71.8588	6.74182	6.24566	coding	NM_017410_intron1-	NM_017410	HOX cluster	5356	chr12	-	54333426	54338783		AACGGGGCCAGAGGATTGCACTGCATAGTGAAGCTCCCTAATGCTTTTCATTTCTGTTAT
CUST_53_PI426247286	605.316	557.014	9.14509	9.21871	coding	NM_000522_intron2-	NM_000522	HOX cluster	712	chr7	-	27238061	27238774		TTTCATTTCAGTTCAGAACTAACTACCTTCCCCACTGACCCTCTAGGCTTTAGCAGAAGA
ASHG19A3H0000598	638.021	743.16	9.22107	9.62811	coding	NM_006361_Exon1+	NM_006361	HOX cluster	757	chr17	+	46805354	46806111		CTGCAAATGCTGCCTTCCAAAAGGGACCTGGTGGGTTCTGTTCTCCCTGGCAACACATCT
ASHG19A3H0000579	84.2503	86.7601	6.31792	6.51081	coding	NM_002146_Exon3+	NM_002146	HOX cluster	606	chr17	+	46629388	46629994		GGAGTTGTTTTTCAGCTTGGACGTTTGCCTCGACTCTTTCATCCAGGGGAATATCTGTTT
ASHG19A3H0000557	160.217	164.082	7.24393	7.44039	coding	NM_173860_Exon2-	NM_173860	HOX cluster	237	chr12	-	54350111	54350348		AAAAGAAGGAGAGAGCTTGCTCCCTCAACAGAAGTCTTTTCTTTTTCATTCTCCGGTTCT
ASHG19A3H0000594	1232.44	1302.25	10.1817	10.4298	coding	NM_024017_Exon2+	NM_024017	HOX cluster	1972	chr17	+	46698525	46700497		CCAGAACCCTCCCATATAATCGACAACTGAAAACAAGCGAGACAATCACCCCCAAAGAAA
CUST_72_PI426249100	492.317	472.199	8.84546	8.97658	coding	NM_153632_Exon2-	NM_153632	HOX cluster	162	chr7	-	27149733	27149895	NM_153632,NM_153631,NM_030661,	AAATCTTCCCCTGGATGAAAGAGTCTCGACAAAACACAAAGCAGAAAACCAGCAGCTCCA
ASHG19A3H0000590	61.4978	85.9758	5.85916	6.49855	coding	NM_004502_Exon2+	NM_004502	HOX cluster	855	chr17	+	46684602	46685457		AATTGCGTTTTATTTTTCCATCCTTTAGATACACACAGAATGTAAAAGGGAGCATGGGGC
ASHG19A3A048664	144.035	82.6501	7.08506	6.44324	coding	NM_018953	HOXC5	RefSeq_coding	1613	chr12	+	54426831	54429142	uc.344+,	TATAAGCAGAGCCCCAATATCCCTGCCTATAACATGCAAACTTGTGGGAACTATGGATCG	3221	Hs.549040	GO:0043565|GO:0003700|GO:0030528|GO:0009952|GO:0051216|GO:0048562|GO:0007275|GO:0006355|GO:0006351|GO:0005634	NP_705897	Homeobox C4
CUST_79_PI426249100	97.7264	226.979	6.54018	7.90829	coding	NM_019102_Exon2-	NM_019102	HOX cluster	709	chr7	-	27180995	27181704	NM_019102,	CGTGGAAGTGTTCCTGTCTCAATAGCTCCAAGCTGTTAAAGATATTTTTATTCAAACTAC
ASHG19A3H0000613	130.29	114.397	6.94521	6.91741	coding	NM_006898_Exon2-	NM_006898	HOX cluster	625	chr2	-	177033758	177034383		GTAAGTGTCCGTAGTTTTGCTGTAGCCATAGCCTCCAAACAGTCCTGGGTTTTCATAGTA
ASHG19A3A016632	176.245	218.836	7.37711	7.859	coding	NM_019558	HOXD8	RefSeq_coding	1879	chr2	+	176994476	176996726		TAATATTGGCGAGGACCCAGACCACTTAAATCAGAGCTCGTCTCCTTCTCAAATGTTTCC	3234	Hs.301963	GO:0043565|GO:0003700|GO:0030528|GO:0008595|GO:0009952|GO:0007275|GO:0000122|GO:0006355|GO:0048705|GO:0006351|GO:0005634	NP_062458	Homeobox D8
CUST_24_PI426249100	490.6	557.114	8.84105	9.21897	coding	NM_002145_Exon1-	NM_002145	HOX cluster	511	chr17	-	46621882	46622393	NM_002145,	GGAGACATTTCAAACTTCATCAATCAAGGAGTCGACATTAATTCCTCCTCCTCCTCCTTT
ASHG19A3H0000574	662.495	425.7	9.27939	8.82892	coding	NM_002144_Exon2+	NM_002144	HOX cluster	431	chr17	+	46606806	46607237		GCTTCTTCTGCTTCATTCGTCGGTTCTGGAACCAAATCTTGACCTGTGTTTCATTGAGCT
ASHG19A3H0000577	220.42	263.084	7.70111	8.12458	coding	NM_002145_Exon1+	NM_002145	HOX cluster	511	chr17	+	46621882	46622393		AAAGGAGGAGGAGGAGGAATTAATGTCGACTCCTTGATTGATGAAGTTTGAAATGTCTCC
ASHG19A3H0000540	574.909	644.544	9.06981	9.42427	coding	NM_153632_intron3+	NM_153632	HOX cluster	1393	chr7	+	27148339	27149733		AAGTAGGAACTAGGTGCTATCCTCTCTCCTGGTGGGTAAAACAGTGATACTCCCTCATTT
ASHG19A3A008519	89.3521	93.9642	6.40559	6.62711	coding	NM_032391	PRAC	RefSeq_coding	403	chr17	-	46799091	46799882		TTCTCAGATCAAGGACCGGCCCATCTTACTACCTCCAAGAGTGCTTTTCTCTCTAATAAG	84366	Hs.116467	GO:0005634	NP_115767	Prostate cancer susceptibility candidate
CUST_54_PI426249100	126.657	128.724	6.9054	7.09306	coding	NM_014213_Exon1+	NM_014213	HOX cluster	901	chr2	+	176987412	176988313	NM_014213,	ATGTCTTCCAGTGGCACCCTCAGCAACTACTACGTGGACTCGCTTATAGGCCATGAGGGC
ASHG19A3H0000637	208.855	196.633	7.62294	7.70214	coding	NM_006896_Exon1+	NM_006896	HOX cluster	511	chr7	+	27195785	27196296		GGCATTTTGGAACAGAGAAGCCCCCGCCGTATATTTGCTAAAAAGCGCGTTCACATAATA
ASHG19A3A008511	174.074	150.997	7.35918	7.32328	coding	NM_004502	HOXB7	RefSeq_coding	1377	chr17	-	46684602	46688383		TTTCTAAATATCCAGCCTCAAGTTCGGTTTTCGCTACCGGAGCCTTCCCAGAACAAACTT	3217	Hs.436181	GO:0005515|GO:0043565|GO:0003700|GO:0030528|GO:0009952|GO:0048704|GO:0007275|GO:0030099|GO:0006355|GO:0006351|GO:0005634	NP_004493	Homeobox B7
CUST_8_PI426249100	1447.49	516.819	10.4124	9.10902	coding	NM_017409_Exon2+	NM_017409	HOX cluster	1108	chr12	+	54382952	54384060	NM_017409,	TCCCTGTCTGGGAGTTGTGTTATTTAAAGATATTCTGTATGTTGTATCTTTTGCATGTAG
ASHG19A3H0000599	78.0229	96.9247	6.20624	6.6705	coding	NM_000523_Exon1-	NM_000523	HOX cluster	868	chr2	-	176957531	176958399		CTGGAAAGGAAGATTTCCAAAAGTGGGACCCCTGTGGCTGGTCCTTGGTGCAGTACACCT
CUST_20_PI426249100	1920.59	813.311	10.8208	9.75693	coding	NM_014620_Exon4+	NM_014620	HOX cluster	1180	chr12	+	54448633	54449813	NM_153633,NM_014620,	ATTTTAGTGTCGATGTGAAATGCCCCGTGATCAATAATAAACCAGTGGATGTGAATTAGT
CUST_88_PI426249100	559.793	457.541	9.03053	8.93263	coding	NM_018951_Exon1-	NM_018951	HOX cluster	988	chr7	-	27212967	27213955	NM_018951,	AAATGTCAGCCAGAAAGGGCTATCTGCTCCCTTCGCCAAATTATCCCACAACAATGTCAT
CUST_92_PI426249100	101.805	149.963	6.59868	7.31393	coding	NM_000522_Exon2-	NM_000522	HOX cluster	1563	chr7	-	27236498	27238061	NM_000522,	GAATGATATCTTGTAAATAAAGACATTCAGCACACTGTGAAAATGTATTTGTGCACCTGC
ASHG19A3H0000524	259.403	590.106	7.93458	9.29703	coding	NM_024017_intron2+	NM_024017	HOX cluster	2616	chr17	+	46700497	46703114		AGGCTTCCTCAGCACTTCCAAAGCTCTGCCTACATCAAGTTCCCTCTCAATTTTTCTCTA
ASHG19A3H0000576	213.909	287.506	7.659	8.25412	coding	NM_002145_Exon2+	NM_002145	HOX cluster	1089	chr17	+	46620020	46621109		AGAGGAAAATAGGTCCCTCTAGTTATTTTTAAGAAAGTCCCCCTAGAGTTTAATTATTCC
ASHG19A3H0000634	308.145	353.164	8.18117	8.55551	coding	NM_024014_Exon2+	NM_024014	HOX cluster	421	chr7	+	27185115	27185536		GTAAGAAATAAATGCACAGACGCTTGCAAAGCTCCGGGCTCCCCTGAAGCTGCGGAAGCC
ASHG19A3A048662	397.111	522.936	8.54288	9.12572	coding	NM_022658	HOXC8	RefSeq_coding	2290	chr12	+	54402889	54406543		ACTAACAGTAGCGAAGGACAAGGCCACTTAAATCAAAACTCGTCTCCCAGCCTCATGTTT	3224	Hs.664500	GO:0005515|GO:0043565|GO:0003700|GO:0016564|GO:0009952|GO:0007275|GO:0000122|GO:0030182|GO:0006355|GO:0048705|GO:0006351|GO:0005634	NP_073149	Homeobox C8
CUST_27_PI426247286	209.192	164.114	7.62575	7.44085	coding	NM_000523_intron1+	NM_000523	HOX cluster	807	chr2	+	176958399	176959207		CCTCAGCTAGGTGCTCCGAATATCCCAGCCTAATTTTTCTTGTGCTTTTGTTTGTATCAG
ASHG19A3H0000564	200.703	208.87	7.5626	7.79248	coding	NM_153693_Exon1-	NM_153693	HOX cluster	557	chr12	-	54410641	54411198		TGCCGCTGCCGAGCCTGTCTCAGCTCCACACACACACACATATACTTTATATAAATTCAA
ASHG19A3H0000529	169.258	189.979	7.31811	7.65095	coding	NM_021192_intron1-	NM_021192	HOX cluster	769	chr2	-	176972864	176973634		GAAAAGGCTCTCGACAGCTATTAATGTCCTCCTCGAAGTCTACCTTAAGCCCACCTAAAT
ASHG19A3H0000615	83.4994	92.7317	6.30448	6.60672	coding	NM_024501_Exon1-	NM_024501	HOX cluster	879	chr2	-	177053306	177054185		TTACCTTTCTTAGAGGCATTCCTCTTCACTTTCATCCACTCGAACGTGCTGAAGGCGGCA
ASHG19A3H0000505	9893.14	10923.7	13.1965	13.4886	coding	NM_022658_intron1-	NM_022658	HOX cluster	1367	chr12	-	54403504	54404872		CTCTGCCCACTGCCCTCTCCTTGTCTCTCTCTGCCTAATGCTTTTCCAATAAGAAAAATA
ASHG19A3H0000525	81.2565	75.6134	6.26552	6.31926	coding	NM_032391_intron2+	NM_032391	HOX cluster	417	chr17	+	46799261	46799679		CGTTATCAATATTAATTTTGCTTATGCCAGGACTCCATCCCATTGGAGACAAACATTAAG
CUST_23_PI426249100	428.316	157.113	8.65003	7.37964	coding	NM_002145_Exon2-	NM_002145	HOX cluster	1089	chr17	-	46620020	46621109	NM_002145,	GGAATAATTAAACTCTAGGGGGACTTTCTTAAAAATAACTAGAGGGACCTATTTTCCTCT
ASHG19A3A008503	456.02	439.028	8.74006	8.87556	coding	NM_002145	HOXB2	RefSeq_coding	1614	chr17	-	46620020	46622393		GGAGACATTTCAAACTTCATCAATCAAGGAGTCGACATTAATTCCTCCTCCTCCTCCTTT	3212	Hs.514289	GO:0043565|GO:0003700|GO:0030528|GO:0009952|GO:0008015|GO:0009953|GO:0048704|GO:0021612|GO:0002011|GO:0007275|GO:0048857|GO:0006355|GO:0021569|GO:0021570|GO:0005634	NP_002136	Homeobox B2
CUST_2_PI426249100	5129.54	3006.55	12.2476	11.6328	coding	NM_017410_Exon2+	NM_017410	HOX cluster	1544	chr12	+	54338783	54340327	NM_017410,	TTCCCACTGGTGCATTACAAAACAGTGTTCTTTTGAAATGTTCATCAGGAATAGGCTTTT
CUST_66_PI426249100	1020.76	1231.92	9.91249	10.3543	coding	NM_005522_Exon1-	NM_005522	HOX cluster	746	chr7	-	27134879	27135625	NM_153620,NM_005522,	CATCTTCTCCAGCGCAGACTTTTGACTGGATGAAAGTCAAAAGAAACCCTCCCAAAACAG
ASHG19A3H0000556	361.098	343.352	8.40712	8.5137	coding	NM_173860_Exon1-	NM_173860	HOX cluster	610	chr12	-	54348713	54349323		AAGGTGTCTCCCGTGTGGATGTTTACCAGCGGCCCCACAAACCCGGGATTCAGGAGATTA
CUST_14_PI426249100	7413.62	4908.18	12.7753	12.3378	coding	NM_004503_Exon2+	NM_004503	HOX cluster	1168	chr12	+	54423438	54424606	NM_153693,NM_004503,	TACCCTCCTGTATAAATCCAACCTCTGGGTCCGTTCTCGAATATTTAATAAAACTGATAT
ASHG19A3A032592	431.698	456.774	8.66188	8.92952	coding	NM_018951	HOXA10	RefSeq_coding	2648	chr7	-	27210210	27213955		AAATGTCAGCCAGAAAGGGCTATCTGCTCCCTTCGCCAAATTATCCCACAACAATGTCAT	3206	Hs.110637	GO:0005515|GO:0043565|GO:0003700|GO:0030528|GO:0009952|GO:0030326|GO:0007275|GO:0009954|GO:0006355|GO:0001501|GO:0007283|GO:0005634|GO:0005667	NP_061824	Homeobox A10
CUST_37_PI426249100	8466.04	6249.62	12.9735	12.686	coding	NM_004502_Exon2-	NM_004502	HOX cluster	855	chr17	-	46684602	46685457	NM_004502,	GCCCCATGCTCCCTTTTACATTCTGTGTGTATCTAAAGGATGGAAAAATAAAACGCAATT
ASHG19A3H0000640	178.395	121.695	7.39434	7.00966	coding	NM_018951_Exon2+	NM_018951	HOX cluster	1582	chr7	+	27210210	27211792		GCTTCATTCCACAGCTTTTATTCTATAAGAACATAAACATCGTCTTTTTCCACGCACAGC
ASHG19A3A048658	955.78	589.309	9.8117	9.29531	coding	NM_014212	HOXC11	RefSeq_coding	2100	chr12	+	54366909	54370201		TGCTGGGGCCTGGATTTTTGTAAATAAATTTCCCAAGCGTTTCTTTCCACCTGGAGGGAA	3227	Hs.127562	GO:0003702|GO:0043565|GO:0003700|GO:0009952|GO:0042733|GO:0007492|GO:0001656|GO:0007275|GO:0001759|GO:0009954|GO:0006355|GO:0001501|GO:0005634	NP_055027	Homeobox C11
CUST_43_PI426249100	89.3377	109.928	6.40544	6.8583	coding	NM_032391_Exon1-	NM_032391	HOX cluster	203	chr17	-	46799679	46799882	NM_032391,	TTCTCAGATCAAGGACCGGCCCATCTTACTACCTCCAAGAGTGCTTTTCTCTCTAATAAG
ASHG19A3A006237	1874.27	1934.92	10.7878	11.0115	coding	NM_153620	HOXA1	RefSeq_coding	2358	chr7	-	27132615	27135625		CTACGCGTTAAATCAGGAAGCAGACCCACCAAGAAGCCTGTCGCTCCCCCGCATCGGAGA	3198	Hs.67397	GO:0003702|GO:0005515|GO:0043565|GO:0003700|GO:0048646|GO:0009952|GO:0021953|GO:0021612|GO:0021754|GO:0030902|GO:0042472|GO:0008045|GO:0007275|GO:0007399|GO:0045944|GO:0021569|GO:0021570|GO:0021571|GO:0005634	NP_705873	Homeobox A1
CUST_35_PI426249100	3343.05	3710.44	11.6284	11.9375	coding	NM_018952_Exon2-	NM_018952	HOX cluster	136	chr17	-	46681841	46681977	NM_018952,	ACAATATTATCTGGAAGCTGAAGAAGAAACTGAATACTCCTTCCTTCCTCCCCACCCATT
ASHG19A3A048659	658.865	737.24	9.27178	9.61602	coding	NM_017409	HOXC10	RefSeq_coding	2017	chr12	+	54378945	54384060		GTAGTATTGCTCCTTAAAAACCCCTCTCTCTGAAAATGACATGCCCTCGCAATGTAACTC	3226	Hs.44276	GO:0003702|GO:0043565|GO:0003700|GO:0009952|GO:0030326|GO:0007275|GO:0050905|GO:0008284|GO:0009954|GO:0006355|GO:0001501|GO:0021520|GO:0019907|GO:0005634	NP_059105	Homeobox C10
CUST_41_PI426249100	197.32	80.4456	7.53989	6.40591	coding	NM_024017_Exon2-	NM_024017	HOX cluster	1972	chr17	-	46698525	46700497	NM_024017,	TTTCTTTGGGGGTGATTGTCTCGCTTGTTTTCAGTTGTCGATTATATGGGAGGGTTCTGG
CUST_83_PI426249100	739.928	494.788	9.44091	9.04974	coding	NM_006896_Exon2-	NM_006896	HOX cluster	1502	chr7	-	27193339	27194841	nc-HOXA6-72-,NM_006896,	CACACTTCCCAGCCCAGCTGTGTTTTATGTAACCGAAAATAAAGATGCGTGGTGACAAAG
CUST_7_PI426247286	138.954	140.931	7.03455	7.21931	coding	NM_153693_intron1+	NM_153693	HOX cluster	11160	chr12	+	54411198	54422359	NM_004503,	TAGACCGACCAGGTAAAGGCAAAGGGATGAATTCCTACTTCACTAACCCTTCCTTATCCT
ASHG19A3A008514	210.336	128.714	7.63466	7.093	coding	NM_024017	HOXB9	RefSeq_coding	2711	chr17	-	46698525	46703835		TTTCTTTGGGGGTGATTGTCTCGCTTGTTTTCAGTTGTCGATTATATGGGAGGGTTCTGG	3219	Hs.463350	GO:0005515|GO:0043565|GO:0003700|GO:0016563|GO:0009952|GO:0060070|GO:0060326|GO:0048706|GO:0030879|GO:0007275|GO:0045944|GO:0006355|GO:0006351|GO:0005739|GO:0005730|GO:0005634|GO:0005634	NP_076922	Homeobox B9
CUST_27_PI426249100	4632.25	4232.1	12.1041	12.1202	coding	NM_002146_Exon2-	NM_002146	HOX cluster	88	chr17	-	46632892	46632980	NM_002146,	TCTGGGGCTCGATGTGAATATATATTATGTCTGCCTGTTCTCCCCTCGTCGGTGGCTAAG
CUST_56_PI426249100	156.521	234.414	7.20829	7.95585	coding	NM_019558_Exon1+	NM_019558	HOX cluster	1195	chr2	+	176994476	176995671	NM_019558,	TAATATTGGCGAGGACCCAGACCACTTAAATCAGAGCTCGTCTCCTTCTCAAATGTTTCC
ASHG19A3A032580	127.464	189.046	6.91468	7.6441	coding	NM_005522	HOXA1	RefSeq_coding	2561	chr7	-	27132615	27135625		TATGGACAGGAGCACCAGAGCCTGGCCCTGGCTACGTATAATAACTCCTTGTCCCCTCTC	3198	Hs.67397	GO:0003702|GO:0005515|GO:0043565|GO:0003700|GO:0048646|GO:0009952|GO:0021953|GO:0021612|GO:0021754|GO:0030902|GO:0042472|GO:0008045|GO:0007275|GO:0007399|GO:0045944|GO:0021569|GO:0021570|GO:0021571|GO:0005634	NP_705873	Homeobox A1
CUST_77_PI426249100	1460.39	1724.06	10.4287	10.8425	coding	NM_002141_Exon2-	NM_002141	HOX cluster	1064	chr7	-	27168126	27169190	NM_002141,	GAACTGTACAAATTGTGATGTGGCTACATAGAAAGCCATGTGCTAAGAATAAACTCCATT
CUST_20_PI426247286	262.544	267.502	7.95333	8.14893	coding	NM_018952_intron3-	NM_018952	HOX cluster	6250	chr17	-	46675590	46681841		TTGACAATTCCTGCCTCTGCCATTGGTCAGTGTTGGATCAGATGGTTGTATTTCCTTCTG
CUST_6_PI426249100	870.179	567.567	9.6736	9.24109	coding	NM_014212_Exon2+	NM_014212	HOX cluster	1237	chr12	+	54368964	54370201	NM_014212,	TGCTGGGGCCTGGATTTTTGTAAATAAATTTCCCAAGCGTTTCTTTCCACCTGGAGGGAA
ASHG19A3H0000518	386.479	278.622	8.50483	8.20905	coding	NM_002147_intron2+	NM_002147	HOX cluster	663	chr17	+	46669818	46670482		GAAAGCTCCTTTTACTGTTCACCCCTTCTTTGCTAGCGACAGTCTCAAAATTTCAGGGGT
ASHG19A3H0000528	395.69	552.125	8.53824	9.20576	coding	NM_021193_intron1-	NM_021193	HOX cluster	145	chr2	-	176965103	176965249		CTGCAACACAGCCCCAACCCACGTCAACCCAGCCCGTACTCTGTCTATTGCCCGCCCCCA
CUST_25_PI426249100	474.126	187.562	8.79482	7.63316	coding	NM_002146_Exon4-	NM_002146	HOX cluster	2311	chr17	-	46626232	46628543	nc-HOXB2-164-,NM_002146,	GGAACTTTCTTTGTTCTTCAGTAGTTACTTTTTTCCTTACCTAAAAGGGTTGTCTGTCAA
CUST_67_PI426249100	80.6486	80.4347	6.25434	6.40559	coding	NM_153620_Exon1-	NM_153620	HOX cluster	448	chr7	-	27135177	27135625	NM_153620,NM_005522,	TATGGCTCACAGAACTTCAGTGCGCCTTACAGCCCCTACGCGTTAAATCAGGAAGCAGAC
CUST_38_PI426247286	133.662	158.187	6.98069	7.38972	coding	NM_153620_intron2-	NM_153620	HOX cluster	202	chr7	-	27134974	27135177	NM_005522,	TATGGACAGGAGCACCAGAGCCTGGCCCTGGCTACGTATAATAACTCCTTGTCCCCTCTC
CUST_7_PI426249100	357.494	479.265	8.39047	9.00123	coding	NM_017409_Exon1+	NM_017409	HOX cluster	849	chr12	+	54378945	54379794	NM_017409,	GTAGTATTGCTCCTTAAAAACCCCTCTCTCTGAAAATGACATGCCCTCGCAATGTAACTC
ASHG19A3A006241	293.068	305.079	8.11071	8.34511	coding	NM_153693	HOXC6	RefSeq_coding	2072	chr12	+	54410641	54424606		AGAGGGAGAGTGACAGCAGCGCTCGGACGTCCTCCCCAACGTCGCCCTCAATTCCACCGC	3221	Hs.549040	GO:0043565|GO:0003700|GO:0030528|GO:0009952|GO:0051216|GO:0048562|GO:0007275|GO:0006355|GO:0006351|GO:0005634	NP_705897	Homeobox C4
ASHG19A3H0000609	73.4004	101.295	6.11802	6.73634	coding	NM_019558_Exon1-	NM_019558	HOX cluster	1195	chr2	-	176994476	176995671		GGAAACATTTGAGAAGGAGACGAGCTCTGATTTAAGTGGTCTGGGTCCTCGCCAATATTA
ASHG19A3H0000546	2092.61	2408.21	10.9386	11.3204	coding	NM_019102_intron2+	NM_019102	HOX cluster	959	chr7	+	27181704	27182664		CCGCACACCCCTCCCGAATTTCCTTCTCTCTTCCTTTCTAGAAAGAAAACAATACGATTT
ASHG19A3H0000548	221.077	167.022	7.70562	7.46917	coding	NM_006896_intron2+	NM_006896	HOX cluster	943	chr7	+	27194841	27195785		TTTCCAGCCGGCTAAGCTTCCACAATGTCCTGCTTCCTCTGACAAAGGAAAACTGTAAAT
CUST_87_PI426249100	7875.75	5045.18	12.8665	12.383	coding	NM_018951_Exon2-	NM_018951	HOX cluster	1582	chr7	-	27210210	27211792	NM_153715,NM_018951,	GCTGTGCGTGGAAAAAGACGATGTTTATGTTCTTATAGAATAAAAGCTGTGGAATGAAGC
CUST_22_PI426249100	115.763	128.988	6.77787	7.0961	coding	NM_002144_Exon1-	NM_002144	HOX cluster	583	chr17	-	46607689	46608272	NM_002144,	TCAGAACCTAACACCCCCACGGCCCGGACCTTCGACTGGATGAAGGTTAAGAGAAACCCA
CUST_30_PI426249100	155.984	88.5826	7.20269	6.53946	coding	NM_024015_Exon1-	NM_024015	HOX cluster	519	chr17	-	46655224	46655743	NM_024015,	TTTGATCAACTCAAACTATGTCGACCCCAAGTTCCCTCCATGCGAGGAATATTCACAGAG
CUST_46_PI426249100	93.2123	120.663	6.4678	6.99818	coding	NM_000523_Exon1+	NM_000523	HOX cluster	868	chr2	+	176957531	176958399	NM_000523,	AGGTGTACTGCACCAAGGACCAGCCACAGGGGTCCCACTTTTGGAAATCTTCCTTTCCAG
ASHG19A3H0000533	358.697	603.399	8.39664	9.32762	coding	NM_014621_intron1-	NM_014621	HOX cluster	540	chr2	-	177016794	177017335		TCCTCAAACACACCCACATACCCCAGGCTTGCGGGATCCCCAAATGTGCTCCTTCTTCTG
CUST_10_PI426249100	460.977	355.887	8.75492	8.5664	coding	NM_022658_Exon2+	NM_022658	HOX cluster	1671	chr12	+	54404872	54406543	NM_022658,	CAGCCCTGTTCCTGGTCCAAGTACTTTGTATTGTATACGTGAGTCATAATAATAAAAAGA
ASHG19A3H0000081	2229.34	2456.97	11.0291	11.3497	noncoding	nc-HOXA1-53-	nc-HOXA1-53	HOX cluster	138	chr7	-	27135887	27136025		GCCCTCTTCCCTTCTCACCTCTCGCCAGTTCATCTTTCATTGAACGGTGGGGAGGGGGCG
ASHG19A3A007737	1902.78	2151.05	10.8078	11.1619	noncoding	NR_033204	LOC404266	RefSeq_NR	486	chr17	+	46669681	46683772		TCTCGATGCGCCGTCGCCGGGTCAGCCGTTTCCTCTCCCTCGCCGGCCTCGGCGGAGATT
ASHG19A3H0000205	21594.7	27253.6	14.3207	14.7923	noncoding	nc-HOXC10-129-	nc-HOXC10-129	HOX cluster	260	chr12	+	54378513	54378773		CTCCACCCCTCTACCTCCCCTGCCGCCCGGGGGGCGCTTCCTTTGTTCGCGGGGAAGGGC
ASHG19A3H0000094	24291.2	17999.3	14.4936	14.2119	noncoding	nc-HOXB9-193-	nc-HOXB9-193	HOX cluster	858	chr17	-	46768301	46769159	ENST00000461606,	CAGAAAATGTTGACATTACTCTGAAGGGATGCACAGTTATTGTGAAGGGCCCCAGAGGAA
ASHG19A3H0000088	237.917	203.501	7.80842	7.7544	noncoding	nc-HOXB2-162-	nc-HOXB2-162	HOX cluster	178	chr17	-	46623286	46623464		CCCACCACACTCATGCACACACATAACGCTGATCTGAACTTTGAGAGTGCTCTAAGTTAA
ASHG19A3H0000061	18382.4	22217.2	14.098	14.5099	noncoding	nc-HOXB9-184-	nc-HOXB9-184	HOX cluster	198	chr17	-	46703989	46704187		CCCTTGCTCTCCCTCCCTCCCCGACCCGCCTGGGGAGAGGGCTCTACAGCCTGCGTCCCT
ASHG19A3H0000066	441.099	482.798	8.69206	9.01078	noncoding	nc-HOXB9-189-	nc-HOXB9-189	HOX cluster	138	chr17	-	46720237	46720375		AGCAACCTTTTTGCTTCAGGGCTCCTCCTGGGGGCTGAGTGGTCCCCTTTGCTTTGCTAT
ASHG19A3H0000025	475.58	515.25	8.79875	9.10449	noncoding	nc-HOXA4-63-	nc-HOXA4-63	HOX cluster	108	chr7	-	27176447	27176555		CTAAGCTCCCACCCAAGTAGGGGAGGGGATCCACAGCCCCAGCCATTCTAAGCCCCAGAA
ASHG19A3H0000065	76.611	99.6328	6.17985	6.71296	noncoding	nc-HOXB9-188-	nc-HOXB9-188	HOX cluster	98	chr17	-	46719077	46719175		GGGGCGCTGAGGAGGTCATTAACCTCCCCGTAAAGATGGGGAACGGAGACGCGCCTGGCC
CUST_112_PI426075208	200.446	196.358	7.56066	7.70061	noncoding	nc-HOXC11-110+	nc-HOXC11-110	HOX cluster	838	chr12	-	54359624	54360462		GAAAAAGAGAGAAAAGTTTCCCGGAGTCTTCATTAGTTGATTTCCCTGTCCGCCGCTTTC
ASHG19A3H0000038	110.844	93.1757	6.71771	6.61456	noncoding	nc-HOXA9-79-	nc-HOXA9-79	HOX cluster	248	chr7	-	27209027	27209275		TTGTTGGGATCCACCTTTCTCTCGACAGCACGACACTGCCTTCATTACTTCAGTTGAAAT
ASHG19A3H0000034	7198.23	7434.1	12.7361	12.9343	noncoding	nc-HOXA7-74-	nc-HOXA7-74	HOX cluster	238	chr7	-	27197697	27197935		TGCGCAGGAACTGGGGCTCCGTGGCGTCCCGATCTGAACCCTCCCTCCACCTTTTGTATT
ASHG19A3H0000208	1465.65	1719.65	10.4333	10.837	noncoding	nc-HOXC9-135-	nc-HOXC9-135	HOX cluster	138	chr12	+	54389365	54389503		CGGGCAGGGCAGGGAGCGGCTCTAGCTCTGGGGCGGCTCCCCCTCCAGCCACTCCCAGGC
CUST_42_PI426075208	21247.6	25014	14.2921	14.6781	noncoding	nc-HOXB13-207+	nc-HOXB13-207	HOX cluster	108	chr17	+	46806423	46806531		AGGAAGAGGGGACGAGGAGCCGGGCCCCACCTCCTTCTCCTCCTCTCCCTCCCTAGCTTT
ASHG19A3H0000158	83.0914	86.6062	6.29788	6.50831	noncoding	nc-HOXC9-132-	nc-HOXC9-132	HOX cluster	148	chr12	+	54386125	54386273		CCTTCCCCTTCTATAGCTCCATCTCCAGGGGAAGGACATGTTTGGGGTGTTGGTAGGTTA
ASHG19A3A008517	484.315	443.984	8.82516	8.89175	noncoding	ENST00000474761	CTD-2377D24.2	Ensembl	144	chr17	-	46767842	46767986	nc-HOXB9-192-,	TTCCAGAAAATGTTAACATCACTCTGAAGGGATACACAGTTGTGAAGGGCCCCAGAGGAA
ASHG19A3H0000047	1511.16	1526.55	10.4755	10.6575	noncoding	nc-HOXB4-167-	nc-HOXB4-167	HOX cluster	348	chr17	-	46656230	46656578		CTAACCGTGCAGCTAAATGAGATTTGGAAGGCGAAGTCTCCCCGAATTAGTGCATGAATT
ASHG19A3H0000203	1416	1162.77	10.3791	10.2727	noncoding	nc-HOXD9-17-	nc-HOXD9-17	HOX cluster	168	chr2	+	176986678	176986846		GTGTGTGAGTGTGGCAGGGGGAGGGGGCCCTCCGATCTGCTCCATCCGTCCGTTTTATTA
ASHG19A3H0000155	361.349	322.295	8.4079	8.42196	noncoding	nc-HOXC8-150-	nc-HOXC8-150	HOX cluster	723	chr12	+	54402165	54402888		TGATGCCTGAAGTATTTGGGAGTATGGTGTGCTTGTTCCTCCTCAAAGTCTCCAGACTTA
ASHG19A3H0000030	2244.92	2311.04	11.0394	11.264	noncoding	nc-HOXA6-70-	nc-HOXA6-70	HOX cluster	178	chr7	-	27191677	27191855		CACCCAGGGAGGCTTTAAGAGGGGCATACTCCCCCTTACCCATACTCACCCATTCACACT
ASHG19A3H0000162	93.5292	101.88	6.47303	6.74531	noncoding	nc-HOXC9-141-	nc-HOXC9-141	HOX cluster	478	chr12	+	54392875	54393353		GACGCCCCACTTAAGTTGTGTAGATCTCTCCTACACTTCTTCAAGCTGGCAAAGAAAGAT
CUST_65_PI426075208	221.673	286.498	7.70935	8.24971	noncoding	nc-HOXB9-188+	nc-HOXB9-188	HOX cluster	98	chr17	+	46719077	46719175		GGCCAGGCGCGTCTCCGTTCCCCATCTTTACGGGGAGGTTAATGACCTCCTCAGCGCCCC
ASHG19A3H0000189	1445.12	2011.62	10.4089	11.0639	noncoding	nc-HOXD4-25-	nc-HOXD4-25	HOX cluster	228	chr2	+	177001718	177001946		TCCCCTACATTTCCCGGGGAAGTGGGGGGTCGCTGTCTAAGCCCCTTCCCCCAATCACTT
ASHG19A3A034087	1541.51	1925.28	10.5019	11.0056	noncoding	ENST00000434063	HOTAIRM1	Ensembl	659	chr7	+	27135724	27139773	nc-HOXA1-59+,	TGCCTCTATTACCAATTTAAATCTATGGCTTGAACCTGTGCACTGAAAATCAAATCCTTT
ASHG19A3H0000127	162.925	304.721	7.26553	8.34354	noncoding	nc-HOXC5-253-	nc-HOXC5-253	HOX cluster	278	chr12	+	54425091	54425369		ACAAAATTCCTTCTTCATTACAGCTCCAGCCGGGCTGGTTCCTTACTTTTCTCTCCTCAA
ASHG19A3H0000090	98.908	84.3774	6.55676	6.47307	noncoding	nc-HOXB4-168-	nc-HOXB4-168	HOX cluster	1808	chr17	-	46657690	46659498	AK000839,	GTCTGAGATTACCTATTGGACCCTCTCTTGGCAAAGACAACCATAGTGTGATAGTTTGCT
CUST_52_PI426075208	283.715	284.131	8.06398	8.23674	noncoding	nc-HOXB4-174+	nc-HOXB4-174	HOX cluster	338	chr17	+	46666090	46666428		TGTCCCTTAATGAGAAAAAGGGAGTCTTATGACCCCATCCTTGTCCCAAAGATCAGAAGC
CUST_25_PI426075208	1641.72	2150.95	10.5924	11.1618	noncoding	nc-HOXA4-63+	nc-HOXA4-63	HOX cluster	108	chr7	+	27176447	27176555		TTCTGGGGCTTAGAATGGCTGGGGCTGTGGATCCCCTCCCCTACTTGGGTGGGAGCTTAG
CUST_75_PI426075208	5621.7	6420.54	12.3748	12.7247	noncoding	nc-HOXB9-204+	nc-HOXB9-204	HOX cluster	198	chr17	+	46800195	46800393		AGGAGAGAAGGTAATGGTGGAATTCTTTCCCTCACTCTCCCCCGACCACTTCGTCCCCTC
ASHG19A3A014670	195.448	289.667	7.52624	8.26411	noncoding	ENST00000417086	AC009336.23	Ensembl	984	chr2	-	177040721	177053268		CGACCGGGGGCTGCCTGGGCAAGGGCGGGGCGAGAGGGCAGAACGCCTGCTCTCGGACAG
CUST_171_PI426075208	246.805	270.402	7.86211	8.16546	noncoding	nc-HOXD10-9+	nc-HOXD10-9	HOX cluster	178	chr2	-	176976808	176976986		TTCAAATACATTCCCCGTTTTACAACGCCTTGAAGTATAAACGTTTCCCCCGAGTGCCTG
ASHG19A3H0000191	236.493	262.626	7.80039	8.12224	noncoding	nc-HOXD4-28-	nc-HOXD4-28	HOX cluster	248	chr2	+	177005928	177006176		CAGCGACACCTTACTTAAATAATGCTCTGACCCAATCCCACTGATCCTCCGTTATCTCTT
CUST_88_PI426075208	169.11	99.7169	7.31629	6.71374	noncoding	nc-HOXB2-162+	nc-HOXB2-162	HOX cluster	178	chr17	+	46623286	46623464		TTAACTTAGAGCACTCTCAAAGTTCAGATCAGCGTTATGTGTGTGCATGAGTGTGGTGGG
CUST_186_PI426075208	102.373	98.3471	6.606	6.6923	noncoding	nc-HOXD3-45+	nc-HOXD3-45	HOX cluster	618	chr2	-	177028029	177028647		TATCAGATGCTTTCCCTGAGTTTATTCATTCCGGTAAGTATCCACCACACTCTTGGCCCT
ASHG19A3H0000087	576.557	507.545	9.0739	9.08379	noncoding	nc-HOXB2-161-	nc-HOXB2-161	HOX cluster	418	chr17	-	46622846	46623264		ATCTCACTCCTATGTGTCTGCCTGGGAGTTCCTGTCCATTTCCCAAGATTTAACTGTTGT
ASHG19A3H0000073	919.131	897.665	9.75438	9.89329	noncoding	nc-HOXB9-202-	nc-HOXB9-202	HOX cluster	108	chr17	-	46796109	46796217		CTGTCCTACCCGTCCCCACCAATTTGCCTTTTACCTGCCGCAGAGCTTGCTTGAACCAAA
CUST_3_PI426075208	1051.6	947.619	9.95622	9.9713	noncoding	nc-HOXA11-83+	nc-HOXA11-83	HOX cluster	223	chr7	+	27224832	27225055		TGAAGTAGAAATTTGGAGACGTAAGCTGACGTGGAAATCTATCCCCATCCTTAGCAGGGA
CUST_142_PI426075208	684.777	649.735	9.3294	9.43451	noncoding	nc-HOXC6-248+	nc-HOXC6-248	HOX cluster	948	chr12	-	54418111	54419059		TTTTATTTGGGGACAATATTTTCCAGAGGTCCTCCTTAGTTGTGTTCTCCCTGTCTCCTC
ASHG19A3H0000010	91.1666	97.5384	6.43465	6.67884	noncoding	nc-HOXA11-92-	nc-HOXA11-92	HOX cluster	98	chr7	-	27232907	27233005		GCGACATAGGTCCTCCCCCAGGTACTGGGGTGTGAACTCGGAGAGCTACCTGATGTCGCG
ASHG19A3H0000169	52.2999	86.7948	5.6246	6.51146	noncoding	nc-HOXD10-7-	nc-HOXD10-7	HOX cluster	388	chr2	+	176974318	176974706		GGTTTCTAGTAAAATGGAGGTTACAGCTTCAATACACTGTATGAATTCTCCTCTTTGAGG
ASHG19A3H0000196	260.627	240.03	7.94178	7.98855	noncoding	nc-HOXD4-33-	nc-HOXD4-33	HOX cluster	208	chr2	+	177012179	177012387		GGTATTGGTGGGGTATCTGGGCCTTGTCATTTTTCTGTGTGTTATATGTGTCTGCTTTAT
ASHG19A3H0000105	125.002	107.99	6.88749	6.83361	noncoding	nc-HOXC10-126-	nc-HOXC10-126	HOX cluster	228	chr12	+	54377223	54377451		ATAACCCCCATGCTGAGGCCACGGTGACCCTGCATATGAAAACACAAAACCATTTCAAAT
ASHG19A3H0000164	2917.51	3443.52	11.4192	11.8255	noncoding	nc-HOXD10-10-	nc-HOXD10-10	HOX cluster	128	chr2	+	176977198	176977326		GGACCAAAGGCCCTGGGGCCTGCCGCTTGCCCCTCTCCCGGAGCTGGCCTCAGCTTTGGT
ASHG19A3H0000080	1100.63	1728.83	10.021	10.8476	noncoding	nc-HOXA13-96-	nc-HOXA13-96	HOX cluster	318	chr7	-	27240358	27240676		TCAGTGTACACTGTGTGTGTGTGTGATGAGTCGTTCTGAGTCTATGGGTCTAAATGCAAA
CUST_117_PI426075208	486.442	449.394	8.83085	8.9092	noncoding	nc-HOXC11-115+	nc-HOXC11-115	HOX cluster	298	chr12	-	54365184	54365482		ACAAAAAATTGTAGCTTGTCTCCATATGTAACCCCTAAAATCCATTCCTCCTCAATGCTC
CUST_39_PI426075208	156.906	235.142	7.21256	7.95941	noncoding	nc-HOXA9-81+	nc-HOXA9-81	HOX cluster	198	chr7	+	27209607	27209805		GGAGGCCGTACTGGGGGAGGGGGAGGCCCCCATGCAGTCCAGCCCGGGTCCACCTAACCG
CUST_170_PI426075208	168.457	147.136	7.31074	7.28427	noncoding	nc-HOXD10-8+	nc-HOXD10-8	HOX cluster	1788	chr2	-	176974818	176976606		TAAAGTGCAGTAGAGCCCTCACCACATTCTTTAACTTGAAGCGATAAATGCCGTGAGAGG
ASHG19A3H0000163	66.455	72.4031	5.97602	6.25718	noncoding	nc-HOXC9-142-	nc-HOXC9-142	HOX cluster	400	chr12	+	54393475	54393875		CCTGGGGGTCCGAGAACCCTGGCTTCGGGGACTGGCATTTTCACCCCATTAAAAAATCCT
ASHG19A3A009654	53.0235	123.786	5.64311	7.03549	noncoding	ENST00000480386	RP11-357H14.4	Ensembl	566	chr17	+	46706036	46712294		CCAAATTCTCTACTAGGCCTCCGAACCAAAACGAAGGAAAATCCGTTTTCTTCTTGGGCT
ASHG19A3A000361	2665.6	2231.85	11.2924	11.2148	noncoding	ENST00000455246	HOTAIR	Ensembl	918	chr12	-	54357532	54368731		CTGGGACAGAAGGAAAGCCCTCCAGCCTCCAGGCCCTGCCTTCTGCCTGCACATTCTGCC
ASHG19A3H0000165	6584.33	7988.92	12.603	13.0377	noncoding	nc-HOXD10-11-	nc-HOXD10-11	HOX cluster	118	chr2	+	176977568	176977686		ATCAGACCAGAACCTCTGGGGGCTGAAGACCTCTCCCCACCCCCATCTTACAAAGTGTGT
CUST_209_PI426075208	7921.83	8182.74	12.8785	13.0712	noncoding	nc-HOXC9-139+	nc-HOXC9-139	HOX cluster	148	chr12	-	54391685	54391833		TGTCAATCAAAAAATCTCCCTCACTAGTTCAAGGAAAAGACAGGAGGTTCCAGTCCCCCT
CUST_201_PI426075208	99.8425	112.28	6.57227	6.89033	noncoding	nc-HOXD8-20+	nc-HOXD8-20	HOX cluster	328	chr2	-	176992588	176992916	uc002ukl.1,	CGAACGAATTGATTCTGACAATTAAGGATTTGTCCTTCAATCTTGCAAATGCCCAATTAA
ASHG19A3H0000190	635	578.932	9.21415	9.26914	noncoding	nc-HOXD4-27-	nc-HOXD4-27	HOX cluster	398	chr2	+	177004548	177004946	uc002ukr.2,	TCGCTACTCATCTTGCCTTTATCTCAGCCTTCCCTGTATAGCTGAACAGTTCTACCTTTG
CUST_207_PI426075208	3211.52	4077.18	11.5661	12.0675	noncoding	nc-HOXC9-133+	nc-HOXC9-133	HOX cluster	108	chr12	-	54387975	54388083		AGCCCTGAGCCCTGGCGTTCCCACCCGAAGCCCCCAGTCCCCGCTGCCGCCGTCTTCTTC
CUST_23_PI426075208	5905.31	6464.63	12.4433	12.7356	noncoding	nc-HOXA4-61+	nc-HOXA4-61	HOX cluster	158	chr7	+	27170427	27170585		TCGAGCCGCTCCTCCCCAGCCCAGCGCGCGCCCCGCCCCGTGCCCCACGTGCAGCGCCCC
ASHG19A3H0000019	158.749	214.012	7.23043	7.8271	noncoding	nc-HOXA1-57-	nc-HOXA1-57	HOX cluster	458	chr7	-	27137677	27138135		CTGTGTGCGAGTGCAAGCTCGTGATCCCAAGAAAAACACTCCACCCAGGATGCCCCAGAA
ASHG19A3H0000130	673.183	690.657	9.30224	9.5193	noncoding	nc-HOXC5-256-	nc-HOXC5-256	HOX cluster	128	chr12	+	54426261	54426389		TGGGCATAGGCCACCTTACCTAACTTAATCCCCTTTCCTCAGCCATTTTTGAAGATTGGA
CUST_34_PI426075208	112.207	72.2506	6.73601	6.25424	noncoding	nc-HOXA7-74+	nc-HOXA7-74	HOX cluster	238	chr7	+	27197697	27197935		AATACAAAAGGTGGAGGGAGGGTTCAGATCGGGACGCCACGGAGCCCCAGTTCCTGCGCA
CUST_24_PI426075208	104.089	110.552	6.62881	6.86614	noncoding	nc-HOXA4-62+	nc-HOXA4-62	HOX cluster	148	chr7	+	27171207	27171355		AAGCAACACCTCCACAGAACCGAGCTTTGAAAACAATAACTTCCTATTTCAGAACTATCC
CUST_53_PI426075208	322.125	313.846	8.24536	8.38436	noncoding	nc-HOXB4-175+	nc-HOXB4-175	HOX cluster	148	chr17	+	46667190	46667338		TTGGTAAAAATCAGGCACCCCCGACCGATGAGGCCTTAAGAAACTGAGAGCACTCATTTC
CUST_4_PI426075208	279.498	219.708	8.0418	7.86416	noncoding	nc-HOXA11-86+	nc-HOXA11-86	HOX cluster	128	chr7	+	27228787	27228915		CGCTTCTTTCCACAGCCTTTGCAGGCGGAATATCGGAATAAAGTGGGTCCAGGCGCCTCT
CUST_96_PI426075208	1369.17	1202.17	10.3319	10.3187	noncoding	nc-HOXC10-117+	nc-HOXC10-117	HOX cluster	238	chr12	-	54370554	54370792		GTCCCCTCCTTCCTTAAAAACAGTGTATAAAAATTCCAATACAGATTTCTCCTAGAGAAA
CUST_49_PI426075208	362.143	476.317	8.41133	8.9916	noncoding	nc-HOXB4-171+	nc-HOXB4-171	HOX cluster	1148	chr17	+	46661680	46662828		TCTTTTGACTATTAAATAACTCCTTGGAAAAAGACGCGGAACCCACCTCCCGCATTTTCA
ASHG19A3H0000177	52.2672	76.2415	5.62293	6.3331	noncoding	nc-HOXD1-48-	nc-HOXD1-48	HOX cluster	138	chr2	+	177046473	177046611		CCTGTGGAGTACACACACACACACACATATATATAAATTATGCTAGTAAAAAGTGTCTCT
CUST_120_PI426075208	159.735	181.205	7.23894	7.58539	noncoding	nc-HOXC12-104+	nc-HOXC12-104	HOX cluster	148	chr12	-	54344876	54345024		CCAACCCTGCAGCCCTGTCTGCCTTGCCCCTTCGGGGCAACTTAGGCTTGGGACCTGACT
ASHG19A3H0000133	86.9194	77.0347	6.36197	6.34737	noncoding	nc-HOXC6-239-	nc-HOXC6-239	HOX cluster	538	chr12	+	54412141	54412679		GTCCTGGGCACTCGGGATCTCTCTAATAATTGGTGCTAATGGCCTGTTGTATAGTCTTAA
ASHG19A3A047647	630.109	545.951	9.2029	9.18881	noncoding	ENST00000505700	AC012531.17	Ensembl	548	chr12	-	54392805	54393794		CCTCGGTCGTGGGCAAGTAGCTTGTTTTTACGTCCCTCAATAAAATTTTTATGAGGATCA
CUST_210_PI426075208	116.224	88.6591	6.78395	6.54091	noncoding	nc-HOXD10-15+	nc-HOXD10-15	HOX cluster	130	chr2	-	176981368	176981498		TGTAATTGTGGATGCCTCTGCCGACCACATGACAACCAAGCCAATGAGATTTGAAAATGG
ASHG19A3H0000100	1140.44	1168.71	10.069	10.2793	noncoding	nc-HOXC10-121-	nc-HOXC10-121	HOX cluster	248	chr12	+	54373384	54373632		CGCACCCCTCCAACCCACTGCACAAAGCAAAGACCCATAACCTTGACTCAGACTGCTGAT
ASHG19A3A014672	125614	148462	16.9547	17.1446	noncoding	ENST00000405359	AC016739.2	Ensembl	345	chr2	-	177065635	177065980	NM_213725,NM_001003,	GCAAAGAAAGAAGAATCCAAGGAGTCTGATGATGACATGGGCCTTGGTCTTTTTGACTAA
CUST_173_PI426075208	862.167	345.749	9.66163	8.52439	noncoding	nc-HOXD11-5+	nc-HOXD11-5	HOX cluster	228	chr2	-	176968692	176968920		ATGAATATTTACAACGGTTCCAGATTTCTCTTCCACCCGCCGGCATCCCGGAAGCCTCCT
CUST_185_PI426075208	2233.45	2143.14	11.0311	11.1566	noncoding	nc-HOXD3-44+	nc-HOXD3-44	HOX cluster	98	chr2	-	177027699	177027797		CCCCTCCCCCAAGCGCTCTTGGCTGGGCCGGGACCTGAGGGTGGTGCGGTGGAGGCCCGA
ASHG19A3A009655	1251.95	1242.65	10.2027	10.3665	noncoding	ENST00000478824	CTD-2377D24.6	Ensembl	1436	chr17	+	46782564	46784708		TATAAAGTAAAAAGATCTTTCTCTCACACTGTCTCCACCTCTCCTGGTCTCACCGTTGTG
CUST_145_PI426075208	234.124	210.321	7.78543	7.80177	noncoding	nc-HOXC6-251+	nc-HOXC6-251	HOX cluster	278	chr12	-	54421441	54421719		TAAAACCTGTTCCCCTGAGTAAGTAGAGTGTGGCTGAGAGTCTTGAATGTAGTAGGGATG
CUST_15_PI426075208	647.754	765.253	9.24615	9.6704	noncoding	nc-HOXA13-97+	nc-HOXA13-97	HOX cluster	348	chr7	+	27241198	27241546	uc003szc.1,	TTTAGCAGTTCTGGGTAAATATTGATTTGCCCCCAGTTTACCTTCTCCCTGACTGGCCAT
CUST_148_PI426075208	410.613	533.402	8.58699	9.15468	noncoding	nc-HOXC8-143+	nc-HOXC8-143	HOX cluster	298	chr12	-	54397275	54397573		AATTATTACAATTAATTACAGCCAAGGAAAGCCATTCATGCCGTGCCTCTCCCGCGCACT
CUST_175_PI426075208	7014.35	7425.01	12.6992	12.9316	noncoding	nc-HOXD13-2+	nc-HOXD13-2	HOX cluster	188	chr2	-	176957160	176957348		CCATTCCCGCCCTCCCCCCCGACCCAGGCGTACGCGCTGCAGCCACCCCCACGAGTTGAT
CUST_16_PI426075208	164.954	168.48	7.28278	7.4815	noncoding	nc-HOXA13-98+	nc-HOXA13-98	HOX cluster	208	chr7	+	27241728	27241936	uc003szc.1,	TTTTTAAAATTCTCGCCTCTGACTCTGTTCGGCTGCCCAGAATTTTTTGGTGCCTTCGTG
ASHG19A3H0000044	227.777	178.675	7.74692	7.56716	noncoding	nc-HOXB2-164-	nc-HOXB2-164	HOX cluster	1039	chr17	-	46626206	46627245	NM_002146,	AATAAGAAAACACATTTCAAACCCAAAAGGCACAAAACACGTTCCCTTCCAACTTTCCCA
CUST_30_PI426075208	202.031	249.314	7.5736	8.04639	noncoding	nc-HOXA6-70+	nc-HOXA6-70	HOX cluster	178	chr7	+	27191677	27191855		AGTGTGAATGGGTGAGTATGGGTAAGGGGGAGTATGCCCCTCTTAAAGCCTCCCTGGGTG
ASHG19A3A055142	3706.71	4614.52	11.7838	12.249	noncoding	uc002inu.2	LOC404266	UCSC_knowngene	427	chr17	+	46679852	46683772		AGCCGCTTCCCTTGCCAGCCGCCAGCCGTTTCCTCTCCCTCGCCGGCCTCGGCGGAGATT
ASHG19A3A047644	220.786	91.4331	7.70375	6.58467	noncoding	ENST00000514702	AC012531.14	Ensembl	368	chr12	-	54377734	54379303	nc-HOXC10-127+,	GGGAGCATGTTTGAAAGAAGACAGACCAGTCTATTTTTGTGGTTGTTTTTAAATAAAAGG
ASHG19A3H0000121	3458.82	4242.59	11.683	12.1249	noncoding	nc-HOXC12-105-	nc-HOXC12-105	HOX cluster	188	chr12	+	54348466	54348654		TTTTAGAAAATCAGTTCAGCAAATAAACCTGCCCCCGCCCTTTGTTACCCCACTCACCCC
CUST_159_PI426075208	20338.4	22556.6	14.2329	14.5263	noncoding	nc-HOXC9-137+	nc-HOXC9-137	HOX cluster	558	chr12	-	54389985	54390543		AGACAGGTTAGAGTCGTCCCCTCCCCCTGCCCCGCGCCTTCCTTTTAGTGATTTAAATTC
CUST_31_PI426075208	86.8306	99.3413	6.35988	6.70847	noncoding	nc-HOXA6-71+	nc-HOXA6-71	HOX cluster	218	chr7	+	27192547	27192765	ENST00000480355,	AGGCGGGGTGGGGACCTTAAATCCCATTTCCTAGCCTGGGGCTGGGTTCAGGGCGCATGC
CUST_128_PI426075208	10167.6	13707.6	13.2369	13.814	noncoding	nc-HOXC5-254+	nc-HOXC5-254	HOX cluster	128	chr12	-	54425551	54425679		CTGCAGCCATTCGGCCCCATCCTCTTCCCCCGTAGCCCCAAGTCTCATACTTCCCTGCCT
ASHG19A3H0000089	62.9493	155.197	5.89679	7.36242	noncoding	nc-HOXB2-163-	nc-HOXB2-163	HOX cluster	208	chr17	-	46625816	46626024		GGACTCTTGGATGCTCTCTGTAGGTTTTTCTGTTTGGCCTGTATGCCTCTAGGTTTTTCA
CUST_50_PI426075208	213.168	202.465	7.65441	7.74636	noncoding	nc-HOXB4-172+	nc-HOXB4-172	HOX cluster	148	chr17	+	46663130	46663278		AATAGGGTATCCTCTATCATGCCTCCAAATCCCTCAAGAGGCGACGCCCCACACAGGCTG
ASHG19A3A014671	127.041	116.251	6.91015	6.94046	noncoding	Z49995		RNAdb	2615	chr2	-	177054646	177057266		CCTTTTCTTCTGTTTCATCCTGCGGTTCTGGAACCAGATTTTGACTTGCGTGTCATTCAG
ASHG19A3A014669	711.524	573.834	9.38543	9.2566	noncoding	uc002uku.2	BC047481	UCSC_knowngene	4061	chr2	-	177037925	177042841	nc-HOXD1-46+,	TTCAATAGCTGGAAAGTAATCAAGTATCCCGAGAACCAATTTATGCACTAGACTCCAAAT
ASHG19A3H0000184	271.771	264.315	8.00409	8.13102	noncoding	nc-HOXD3-43-	nc-HOXD3-43	HOX cluster	368	chr2	+	177027239	177027607		CTGAAGGCTTTTCTGGTGGTCCAACTTTGGTTAACTTGGGGTCCTCTTTCCTTTCTTCTT
CUST_33_PI426075208	7714.43	6542.96	12.8368	12.7543	noncoding	nc-HOXA7-73+	nc-HOXA7-73	HOX cluster	148	chr7	+	27196467	27196615		GCCCCCCCGCCGACTCCTGCTAGTGAGCCCTGGACCAAGCTTGGGATCCTCCCCATCCCT
ASHG19A3H0000119	317.171	386.875	8.22237	8.68843	noncoding	nc-HOXC12-103-	nc-HOXC12-103	HOX cluster	148	chr12	+	54343936	54344084		GTTCCTGTCCGCGCTCTCCCAGCCTAGCGAGCCCCGGGGTTGGTAGTCCATTCCCCACCC
CUST_61_PI426075208	867.785	1029.1	9.67051	10.0911	noncoding	nc-HOXB9-184+	nc-HOXB9-184	HOX cluster	198	chr17	+	46703989	46704187		AGGGACGCAGGCTGTAGAGCCCTCTCCCCAGGCGGGTCGGGGAGGGAGGGAGAGCAAGGG
CUST_158_PI426075208	138.014	201.243	7.025	7.73773	noncoding	nc-HOXC9-132+	nc-HOXC9-132	HOX cluster	148	chr12	-	54386125	54386273		TAACCTACCAACACCCCAAACATGTCCTTCCCCTGGAGATGGAGCTATAGAAGGGGAAGG
ASHG19A3H0000107	636.14	596.351	9.21645	9.31214	noncoding	nc-HOXC10-128-	nc-HOXC10-128	HOX cluster	158	chr12	+	54378343	54378501		CCACAAACCTCACCCCACTCCCATCCCCAAGGTAAGAAGTGGGAGTCGGGTCCGGGGATA
CUST_195_PI426075208	18972.4	20242.6	14.1391	14.3834	noncoding	nc-HOXD4-32+	nc-HOXD4-32	HOX cluster	118	chr2	-	177011899	177012017		AGCCGCTCCATCTGCCCCTCACCCCTGCTTCCTATCTCTCCCACCCTGGGAGCAATTCAG
CUST_183_PI426075208	435.626	500.155	8.67455	9.064	noncoding	nc-HOXD3-42+	nc-HOXD3-42	HOX cluster	178	chr2	-	177026009	177026187		TTTTCAGCCCATTCTCCTAAGTGCACATTTAGCCCCCAAATATTTCCTCCAGCACTCAAT
CUST_2_PI426075208	539.097	741.531	8.98024	9.62542	noncoding	nc-HOXA10-82+	nc-HOXA10-82	HOX cluster	370	chr7	+	27220757	27221127		TTTCCAAATGTTGCAAGAGATTAAAAAGACCATTCTCAATACCTTTTCCACCCCCTCCAA
CUST_198_PI426075208	400.219	343.135	8.55337	8.51207	noncoding	nc-HOXD4-35+	nc-HOXD4-35	HOX cluster	188	chr2	-	177015499	177015687		TGAAGCTTGCTTTCTTCCCACAGGCCCCAAATACAAGCAAGCCCCCATTTGGGTACCTTT
ASHG19A3A009659	177.199	190.451	7.38566	7.65467	noncoding	ENST00000495536	CTD-2377D24.4	Ensembl	532	chr17	+	46810452	46811250		TGAACTGCTTGGGGTCGCCCGGCTCCTCTCGATTTTATGAAAATGGCCTAATTGAGGTGT
CUST_188_PI426075208	89.79	67.0612	6.41183	6.14561	noncoding	nc-HOXD4-23+	nc-HOXD4-23	HOX cluster	178	chr2	-	176998758	176998936		GTCTTTATTTGAACACAAATCTATGCTCTTTCCCAGCTACAAAAGGAAACATTTACCTAC
CUST_202_PI426075208	7198.5	6497.62	12.7361	12.7431	noncoding	nc-HOXD9-16+	nc-HOXD9-16	HOX cluster	558	chr2	-	176984428	176984986		AAGATACATTGTAATGTGCTTTTTAAGTCCCCCTCCCTCCAACTTGTGGGTTTTCTTAAT
CUST_140_PI426075208	299.244	337.949	8.13954	8.48996	noncoding	nc-HOXC6-246+	nc-HOXC6-246	HOX cluster	968	chr12	-	54416901	54417869		TCTCTGACTTAAGGTTAAAACGTAAAATAGGTCCCAAACATCTCTACCCCATCACGCTCA
CUST_135_PI426075208	101.211	140.781	6.5905	7.21768	noncoding	nc-HOXC6-241+	nc-HOXC6-241	HOX cluster	208	chr12	-	54413201	54413409		ATAGAGGCCTCACCGGTCGGCGATTCCCACATTACTCCAGGAGAAAGGCTCCCTTTTTCG
ASHG19A3A047650	2087.25	2028.2	10.9344	11.0761	noncoding	ENST00000513381	RP11-834C11.5	Ensembl	499	chr12	-	54478915	54519614		AGCAATTTTCTCCCTCTCCAGGCCTCTTACAGATGTGAAACAACTGGCAGATCTGACTTT
CUST_29_PI426075208	91.8017	158.045	6.44672	7.38863	noncoding	nc-HOXA6-69+	nc-HOXA6-69	HOX cluster	128	chr7	+	27190967	27191095		TGGATTGGGGGGTCCCCCTATCGCCCAGACTCGGTTTGCGTCCTTCCTTCAACCTTAGCT
CUST_205_PI426075208	168.792	153.395	7.31342	7.3457	noncoding	nc-HOXC10-129+	nc-HOXC10-129	HOX cluster	260	chr12	-	54378513	54378773		GCCCTTCCCCGCGAACAAAGGAAGCGCCCCCCGGGCGGCAGGGGAGGTAGAGGGGTGGAG
ASHG19A3H0000052	53.884	79.8638	5.66707	6.39687	noncoding	nc-HOXB4-174-	nc-HOXB4-174	HOX cluster	338	chr17	-	46666090	46666428		GCTTCTGATCTTTGGGACAAGGATGGGGTCATAAGACTCCCTTTTTCTCATTAAGGGACA
CUST_150_PI426075208	2176.9	2230.8	10.9932	11.2141	noncoding	nc-HOXC8-145+	nc-HOXC8-145	HOX cluster	308	chr12	-	54399435	54399743		TTTTCTCTTTTTGTTACCCTCCCTTCTCCAATTAAGAGACTCTAAGCAAAGCAACTGCCG
ASHG19A3H0000111	134.089	164.107	6.9848	7.44071	noncoding	nc-HOXC11-109-	nc-HOXC11-109	HOX cluster	1088	chr12	+	54358466	54359554		AAAAGGAGACAGTAGGGTCTCCCAACATCACCCTAAGCCCTACAAAATGGCTATTCCTAA
CUST_208_PI426075208	376.105	505.725	8.46472	9.07959	noncoding	nc-HOXC9-135+	nc-HOXC9-135	HOX cluster	138	chr12	-	54389365	54389503		GCCTGGGAGTGGCTGGAGGGGGAGCCGCCCCAGAGCTAGAGCCGCTCCCTGCCCTGCCCG
ASHG19A3A000446	114.774	149.32	6.76576	7.30796	noncoding	ENST00000504891	RP11-834C11.6	Ensembl	528	chr12	+	54475901	54496477		CTGGCCCTCTTATAAAAAAAAGAAAGAAAAGCCTTGTTTTCTCTAGATCAGAGAGATGGC
CUST_93_PI426075208	440.556	574.885	8.69031	9.25982	noncoding	nc-HOXB9-192+	nc-HOXB9-192	HOX cluster	318	chr17	+	46767765	46768083	nc-HOXB9-193+,	TTTCTGGAATGTCAACAGTCTGATTGCTGAGAATGGTCTTCATTCTCGCAGTAGACGTGG
CUST_156_PI426075208	89.1246	110.3	6.40186	6.86267	noncoding	nc-HOXC9-130+	nc-HOXC9-130	HOX cluster	151	chr12	-	54384062	54384213		TCAGCCTCTTCGGGGGAGGGGTGTTGCTAAAAATCACTAAAAACAAAAAACCATCCATTT
CUST_197_PI426075208	2483.61	2440.67	11.1864	11.3392	noncoding	nc-HOXD4-34+	nc-HOXD4-34	HOX cluster	158	chr2	-	177012419	177012577		TTCTATCCGCCCACTCCGCTGGCTTGGCCCCTTAGCCCACCACTTCCCCGCGATCAGTAC
ASHG19A3H0000179	12857.6	13849	13.5812	13.8314	noncoding	nc-HOXD3-37-	nc-HOXD3-37	HOX cluster	168	chr2	+	177017979	177018147		AAATGAAGGTTGGATGCTTTATCCCACTGTGAATTTGGACATTCTCCCCCACTCCACCCC
CUST_141_PI426075208	381.778	369.603	8.48795	8.62515	noncoding	nc-HOXC6-247+	nc-HOXC6-247	HOX cluster	138	chr12	-	54417941	54418079		AGTCTCACTTTTCTGAGCAAGAGAAGAACGGTTGCCCCGCTGGCCCCTTTTGTGCCACTG
ASHG19A3H0000103	177.275	209.465	7.38617	7.79559	noncoding	nc-HOXC10-124-	nc-HOXC10-124	HOX cluster	248	chr12	+	54376443	54376691		CTCCTCCCTGGAGTATTATTTTCATTAATGATGGCGATAATTCCGAAGCGACTCTGTCCT
CUST_70_PI426075208	316.105	419.761	8.2169	8.80637	noncoding	nc-HOXB9-197+	nc-HOXB9-197	HOX cluster	198	chr17	+	46783424	46783622	ENST00000478824,	ATCTTTTCTGGAACTGAACATCCATCCTTAAGGCCAGATTTCTCCCATCACCAACTTTAA
CUST_21_PI426075208	2339.34	2316.44	11.1009	11.2689	noncoding	nc-HOXA1-59+	nc-HOXA1-59	HOX cluster	1265	chr7	+	27138707	27139972		CTTTCTGTTTTGTTGCTGTCCATTGAAGACTTTGAACATGCCGCCTTAATAAATGTATTA
CUST_99_PI426075208	62.8108	89.7266	5.89381	6.55808	noncoding	nc-HOXC10-120+	nc-HOXC10-120	HOX cluster	208	chr12	-	54372104	54372312		GGTCTGAGTGTGTTGGGAGAGCCAAGACCCTCCACTACAGGTTTGTTTACTATTTAGGGC
ASHG19A3H0000009	453.515	425.004	8.73263	8.82649	noncoding	nc-HOXA11-91-	nc-HOXA11-91	HOX cluster	118	chr7	-	27232517	27232635		GAGAATAATCGGGTATTTAATCTCTCCCGGTCTTAATTCTTGGCAGCGTGGAAGGTGGTT
ASHG19A3A014667	117.293	102.392	6.79738	6.75379	noncoding	uc002ukl.1	AX747372	UCSC_knowngene	641	chr2	-	176992554	176993195		GTCCTTCAATCTTGCAAATGCCCAATTAAAAGATTATTATTGTCAATAAAGCCTTGGAGC
ASHG19A3H0000097	626.332	923.352	9.19364	9.93442	noncoding	nc-HOXC10-118-	nc-HOXC10-118	HOX cluster	118	chr12	+	54371444	54371562		AGGAATGCAACTGAGGGGCCTCTGTACATTTTTGTGTGTGTATGTGTGTGTGACACTTCT
ASHG19A3H0000109	275.753	386.863	8.02434	8.68812	noncoding	nc-HOXC11-107-	nc-HOXC11-107	HOX cluster	148	chr12	+	54352146	54352294		CCAGCAGAATGGAGATAAAATCACATGCCTCCATCCCCCGCTGGGTATCTGACACCTGAC
ASHG19A3H0000079	253.505	270.334	7.90426	8.16506	noncoding	nc-HOXA11-85-	nc-HOXA11-85	HOX cluster	1838	chr7	-	27226847	27228685		GCAACTAAAAGTGTTCGGCCACTCCAGGCGTTTTCCCTTCTGCTGATATCAAAAACCTTT
ASHG19A3H0000145	96.3242	71.706	6.51826	6.24217	noncoding	nc-HOXC6-251-	nc-HOXC6-251	HOX cluster	278	chr12	+	54421441	54421719		CATCCCTACTACATTCAAGACTCTCAGCCACACTCTACTTACTCAGGGGAACAGGTTTTA
ASHG19A3H0000118	1763.03	1965.65	10.7012	11.0353	noncoding	nc-HOXC11-116-	nc-HOXC11-116	HOX cluster	228	chr12	+	54366534	54366762		CCATACATGAGAGCCCTCCTCCTTCCCCCAATCCTGGGGGAAAAAAGAGCAGCAGCTAGA
CUST_104_PI426075208	171.866	120.189	7.34111	6.99236	noncoding	nc-HOXC10-125+	nc-HOXC10-125	HOX cluster	128	chr12	-	54376743	54376871		CTGGTGGGTCCTTTTCCCCACGGCCAAGTGGCCCTTGGCCACCTCAGCCTTTTCTTTTTT
ASHG19A3H0000074	252.746	210.368	7.89999	7.80222	noncoding	nc-HOXB9-203-	nc-HOXB9-203	HOX cluster	118	chr17	-	46799885	46800003		TCCAGCTTTCGCCCCTACTTGCAGCTATGAGGTGGGGAGCCACCAACCGCAGGCCTTCTT
ASHG19A3H0000161	1485.99	1435.16	10.4504	10.5739	noncoding	nc-HOXC9-140-	nc-HOXC9-140	HOX cluster	938	chr12	+	54391845	54392783		ACAGACTGGGACTCTTCCTTTCTGACCCTGAAATTGCACCCCTCCTTTAAATTCACTCTA
ASHG19A3H0000093	2196.38	2166.99	11.0074	11.1733	noncoding	nc-HOXB9-192-	nc-HOXB9-192	HOX cluster	318	chr17	-	46767765	46768083	nc-HOXB9-193-,	CCACGTCTACTGCGAGAATGAAGACCATTCTCAGCAATCAGACTGTTGACATTCCAGAAA
ASHG19A3A016637	954.513	1289.18	9.80968	10.4183	noncoding	ENST00000426615	AC009336.24	Ensembl	658	chr2	+	177042908	177043737		GAAGTAGGCTAAGACTGCTGTTGAACTTGAAGCTAAACTTGAATGCCATTTAAAATAACA
ASHG19A3H0000207	87.6586	173.663	6.37528	7.52401	noncoding	nc-HOXC9-133-	nc-HOXC9-133	HOX cluster	108	chr12	+	54387975	54388083		GAAGAAGACGGCGGCAGCGGGGACTGGGGGCTTCGGGTGGGAACGCCAGGGCTCAGGGCT
CUST_60_PI426075208	473.376	575.276	8.79246	9.26051	noncoding	nc-HOXB8-183+	nc-HOXB8-183	HOX cluster	158	chr17	+	46696749	46696907		CGGGGCCCACCCATTCCCCCGCCAGGCCGGGAGCCCCGGCCCAGCTGCGGCTCTCTCAGC
ASHG19A3H0000035	290.803	247.682	8.10121	8.03622	noncoding	nc-HOXA7-75-	nc-HOXA7-75	HOX cluster	108	chr7	-	27200477	27200585		TGGGAAACAAGGAATCGGCGGGGGCTTGCCCGACCCTCACCGCTCGCGCCTCCCTGACCC
ASHG19A3H0000095	57.8063	67.3305	5.76715	6.15161	noncoding	nc-HOXB9-199-	nc-HOXB9-199	HOX cluster	188	chr17	-	46791012	46791200		CTTTAGCAATCACTGCCTTCTCACAGAGGTGGAAGTCCAGGTAGTCCTGCAAGCAGTTCC
ASHG19A3A034091	65.9044	67.1247	5.96367	6.14716	noncoding	NR_002795	HOXA11AS	RefSeq_NR	1628	chr7	+	27225026	27228912	nc-HOXA11-84+,	ATTTGCACGGTGACTTGATTACACTCTCTCATTCATGGTCACTTCCGAAGCGCTTTAGTG
CUST_137_PI426075208	989.648	718.532	9.867	9.57629	noncoding	nc-HOXC6-243+	nc-HOXC6-243	HOX cluster	958	chr12	-	54414121	54415079		ATATAATAAATATATAACACTCCCAAGCCTGGTTTCAGAACACAGCCAACCCAACAAGGT
CUST_27_PI426075208	324.23	289.433	8.2543	8.2634	noncoding	nc-HOXA4-65+	nc-HOXA4-65	HOX cluster	178	chr7	+	27179247	27179425		TGCGGCCCTGCCAGGTCCCCACACACAGGCCCATTCGCACACAAAAATCATCTTTTTGCA
CUST_22_PI426075208	252.654	262.986	7.89961	8.12428	noncoding	nc-HOXA2-60+	nc-HOXA2-60	HOX cluster	148	chr7	+	27142497	27142645		TCCCGGAGTACGTGGGGGCGAGGGTGCCTGCGTGCCTCCTGATCTGCAAGGATCTATCTA
CUST_182_PI426075208	3102.33	3712.38	11.518	11.9384	noncoding	nc-HOXD3-41+	nc-HOXD3-41	HOX cluster	128	chr2	-	177025459	177025587		GAGCGGCAGCCACCCGCGCCCCCACCCACTCCTGGGTTTCTGCCCAGCCCTCCCAGGCCC
CUST_95_PI426075208	7400.29	7490.9	12.7737	12.9467	noncoding	nc-HOXB9-199+	nc-HOXB9-199	HOX cluster	188	chr17	+	46791012	46791200	ENST00000489624,	GGAACTGCTTGCAGGACTACCTGGACTTCCACCTCTGTGAGAAGGCAGTGATTGCTAAAG
CUST_86_PI426075208	340.071	373.604	8.3192	8.63814	noncoding	nc-HOXA9-77+	nc-HOXA9-77	HOX cluster	678	chr7	+	27206497	27207175		ATTTTCATTTAAAAAATTAACCCTGGAGGAAACCCTGGCTCCCAATTTTAAGTGTCTGCA
ASHG19A3H0000055	630.191	634.547	9.20317	9.3999	noncoding	nc-HOXB4-177-	nc-HOXB4-177	HOX cluster	108	chr17	-	46668510	46668618		TCTCCCATCCCGGGCACACCCTGCACCATTCTCAATAGATCTGGGGTGCAGGGAAGAAAA
ASHG19A3H0000008	612.469	606.389	9.16238	9.3338	noncoding	nc-HOXA11-90-	nc-HOXA11-90	HOX cluster	168	chr7	-	27231227	27231395		CTTTGGTGAGACCCTTGATGCTCTTCTCCTGCCTAAAATCCACACAGATGTGAGGCGCAC
ASHG19A3H0000039	7119.7	6736.07	12.7203	12.796	noncoding	nc-HOXA9-81-	nc-HOXA9-81	HOX cluster	198	chr7	-	27209607	27209805		CGGTTAGGTGGACCCGGGCTGGACTGCATGGGGGCCTCCCCCTCCCCCAGTACGGCCTCC
ASHG19A3H0000123	395.971	351.18	8.53928	8.54695	noncoding	nc-HOXC4-152-	nc-HOXC4-152	HOX cluster	229	chr12	+	54407760	54407989		CACCCCTCATCTGTCTAGCTCCTGGTCAATGATTTTCCCAGACCTAGGCCCAGGCCAACT
ASHG19A3H0000185	467.568	456.916	8.77561	8.92981	noncoding	nc-HOXD3-44-	nc-HOXD3-44	HOX cluster	98	chr2	+	177027699	177027797		TCGGGCCTCCACCGCACCACCCTCAGGTCCCGGCCCAGCCAAGAGCGCTTGGGGGAGGGG
ASHG19A3H0000156	3754.53	3522.07	11.7987	11.8579	noncoding	nc-HOXC9-130-	nc-HOXC9-130	HOX cluster	151	chr12	+	54384062	54384213		AAATGGATGGTTTTTTGTTTTTAGTGATTTTTAGCAACACCCCTCCCCCGAAGAGGCTGA
CUST_45_PI426075208	115.042	195.745	6.76869	7.69491	noncoding	nc-HOXB3-165+	nc-HOXB3-165	HOX cluster	346	chr17	+	46651812	46652158		GAAAAAACGACTTTTAATTGCATATGCTCTCCCGAGCCCCGAGCTTTTTGGAGATGTGGT
ASHG19A3H0000138	198.777	184.835	7.54812	7.61392	noncoding	nc-HOXC6-244-	nc-HOXC6-244	HOX cluster	1488	chr12	+	54415121	54416609		TCCCAGCCTTTTTCCCTTCCAGAGACACAAAAAGACAGAGCAGAGGGGAAATATCAATGT
ASHG19A3H0000031	238.234	289.701	7.81045	8.2643	noncoding	nc-HOXA6-71-	nc-HOXA6-71	HOX cluster	218	chr7	-	27192547	27192765		GCATGCGCCCTGAACCCAGCCCCAGGCTAGGAAATGGGATTTAAGGTCCCCACCCCGCCT
CUST_125_PI426075208	252.6	215.445	7.89935	7.83585	noncoding	nc-HOXC4-263+	nc-HOXC4-263	HOX cluster	152	chr12	-	54429147	54429299		GTTTGTGGGTCTCCTTCTACATCTCACAGCCCATTTAGACAATTTTACCCAATACATGCC
CUST_69_PI426075208	494.028	565.259	8.85077	9.23505	noncoding	nc-HOXB9-196+	nc-HOXB9-196	HOX cluster	208	chr17	+	46782504	46782712		AGAGACAGAAATCAAATCTAGGGTGTTCATCTAGAGTCTCCTGCTCCTCCATTCCTGCTT
ASHG19A3H0000154	427.6	582.813	8.647	9.2787	noncoding	nc-HOXC8-149-	nc-HOXC8-149	HOX cluster	228	chr12	+	54401765	54401993		TGCTCCAGTCCCCTCCAACTCAGATGCAAATAGTCTCCTAAGAAGAAATGTCCTGAATCA
CUST_189_PI426075208	298.864	457.185	8.13767	8.93111	noncoding	nc-HOXD4-25+	nc-HOXD4-25	HOX cluster	228	chr2	-	177001718	177001946		AAGTGATTGGGGGAAGGGGCTTAGACAGCGACCCCCCACTTCCCCGGGAAATGTAGGGGA
ASHG19A3H0000013	125.763	90.5261	6.89521	6.56921	noncoding	nc-HOXA13-101-	nc-HOXA13-101	HOX cluster	138	chr7	-	27256845	27256983		CCTGGATCTCTTTTGCCTAGCATTTATCTTATACAGACCCATATATACACCTACCCACCC
ASHG19A3A047646	219.335	215.046	7.69491	7.83344	noncoding	ENST00000513533	AC012531.16	Ensembl	504	chr12	-	54388991	54390569		GGGACGCCTTAACCAGCCCCTCTCAGTTGCAGATAACCCAATGAATGAAAGTGCAAATTC
ASHG19A3H0000020	101.729	109.455	6.59754	6.85294	noncoding	nc-HOXA1-58-	nc-HOXA1-58	HOX cluster	148	chr7	-	27138197	27138345		ACCTACTTGCCTAGAGGGCCAAGGATCTCCTACTCGGTGGAACGGCCCCCAGAATTTCTT
ASHG19A3H0000085	169.554	198.656	7.32044	7.71813	noncoding	nc-HOXA5-68-	nc-HOXA5-68	HOX cluster	648	chr7	-	27183537	27184185		CCGGACCCTGTGATGAAGATTTTCCAGGCTGGATACGTAAGCAAATCAAATCGCAAACTA
CUST_132_PI426075208	905.353	932.256	9.73374	9.94685	noncoding	nc-HOXC6-238+	nc-HOXC6-238	HOX cluster	238	chr12	-	54411811	54412049		GGTAGGCCTCTTTTCTCTGAGCACAAGATGGCTTTTGAGTACAGCATCCCCCACCCCCAC
ASHG19A3H0000178	132.646	116.751	6.96984	6.94744	noncoding	nc-HOXD1-49-	nc-HOXD1-49	HOX cluster	108	chr2	+	177048382	177048490		CCACCCCAACTCCTACAGCAGAATTATTCAAAGTGTGGTCCCAAACAATCTTGCTTTAGG
CUST_97_PI426075208	140.527	179.764	7.0514	7.57463	noncoding	nc-HOXC10-118+	nc-HOXC10-118	HOX cluster	118	chr12	-	54371444	54371562		AGAAGTGTCACACACACATACACACACAAAAATGTACAGAGGCCCCTCAGTTGCATTCCT
ASHG19A3H0000057	2700.7	2701.41	11.3114	11.4848	noncoding	nc-HOXB5-179-	nc-HOXB5-179	HOX cluster	101	chr17	-	46673010	46673111		TCTCTCCTCAACCCCCAGCCTCTCCATCTTTCCTGAGCCAGAATTCTTCAGCAAAGGCGA
ASHG19A3H0000023	151.609	362.29	7.16285	8.59734	noncoding	nc-HOXA4-61-	nc-HOXA4-61	HOX cluster	158	chr7	-	27170427	27170585		GGGGCGCTGCACGTGGGGCACGGGGCGGGGCGCGCGCTGGGCTGGGGAGGAGCGGCTCGA
CUST_152_PI426075208	102.878	95.688	6.61212	6.65225	noncoding	nc-HOXC8-147+	nc-HOXC8-147	HOX cluster	208	chr12	-	54400415	54400623		AACCCTGCCAGAGAGCTATTCTTCCGGGGCTTTGTGTCTTGGAATGCGACTGTCCCGAGT
CUST_46_PI426075208	687.971	778.452	9.33597	9.69508	noncoding	nc-HOXB4-166+	nc-HOXB4-166	HOX cluster	263	chr17	+	46655745	46656008		ATAAGGAAATCTGCTCACCCGGACCCCACTCCAGCCAAAGAGGTTTATTTCCCCTTCTTC
CUST_63_PI426075208	1767.35	1825.14	10.7051	10.9273	noncoding	nc-HOXB9-186+	nc-HOXB9-186	HOX cluster	168	chr17	+	46715352	46715520		TAAAGTCGGGTCTGTATGTGTCAGCATTCCTGTGTGTGAGTGTGTGTGTGAATATGTGCA
ASHG19A3H0000027	153.131	124.851	7.17678	7.04756	noncoding	nc-HOXA4-65-	nc-HOXA4-65	HOX cluster	178	chr7	-	27179247	27179425		TGCAAAAAGATGATTTTTGTGTGCGAATGGGCCTGTGTGTGGGGACCTGGCAGGGCCGCA
CUST_194_PI426075208	442.782	122.667	8.69779	7.02237	noncoding	nc-HOXD4-31+	nc-HOXD4-31	HOX cluster	108	chr2	-	177010079	177010187		AACTTTGGGGGCTCAAAACTGGGTGGGAGTTTTAGGAGCACTACCCCCACACCCACACTG
CUST_126_PI426075208	2395.27	2243.24	11.1362	11.2212	noncoding	nc-HOXC4-264+	nc-HOXC4-264	HOX cluster	768	chr12	-	54429771	54430539		GTAAAGTTTTATGGACCCTTCCCACATTTGTTTCTACTGTAAAGTGCTTCCTCCCCCAGC
ASHG19A3H0000129	293.62	280.372	8.1126	8.21852	noncoding	nc-HOXC5-255-	nc-HOXC5-255	HOX cluster	468	chr12	+	54425701	54426169		ATAACGGGCCTTTTCCTCTGCCATGCTCACGTAATATTTGTGGAGGCTTCAATCTTGCTT
ASHG19A3A008518	69811.6	69704.8	16.0799	16.1048	noncoding	ENST00000461606	CTD-2377D24.1	Ensembl	579	chr17	-	46768477	46769056	nc-HOXB9-193-,NM_001024921,NM_000661,ENST00000489563,ENST00000466501,ENST00000463864,ENST00000397509,ENST00000393394,	GAAAGATGAATTCATCCTTGAAGGAAATGACATTGAGCTTGTTTCAAATTCAGCGGCTTT
ASHG19A3A007734	913.573	1013.7	9.74684	10.0707	noncoding	NR_033201	LOC404266	RefSeq_NR	570	chr17	+	46667822	46683772		GGCCAAGCTGGAAGGGATTGACCGGCCGTTTCCTCTCCCTCGCCGGCCTCGGCGGAGATT
ASHG19A3A032595	156.796	80.8947	7.21097	6.41511	noncoding	HIT000098379		H-invDB	227	chr7	-	27235768	27235994	nc-HOXA11-93-,	ACCTCCTTGACTTTAGAGATTCAGTACTCAATTATTTGGCTCCAGCTGGAGCAAATTTGA
CUST_203_PI426075208	11262.8	8384.94	13.3867	13.1065	noncoding	nc-HOXD9-17+	nc-HOXD9-17	HOX cluster	168	chr2	-	176986678	176986846		TAATAAAACGGACGGATGGAGCAGATCGGAGGGCCCCCTCCCCCTGCCACACTCACACAC
ASHG19A3H0000160	15273.6	13156.5	13.824	13.7512	noncoding	nc-HOXC9-138-	nc-HOXC9-138	HOX cluster	148	chr12	+	54391355	54391503		TATCTCTTTTCATCTTGCCTTCCTTCTTTTAATTCTCCCCCTTTTTTCCCTTTATTCTAA
ASHG19A3H0000175	70.1008	78.9116	6.05365	6.3798	noncoding	nc-HOXD13-2-	nc-HOXD13-2	HOX cluster	188	chr2	+	176957160	176957348		ATCAACTCGTGGGGGTGGCTGCAGCGCGTACGCCTGGGTCGGGGGGGAGGGCGGGAATGG
ASHG19A3H0000032	1362.43	769.717	10.3248	9.67839	noncoding	nc-HOXA6-72-	nc-HOXA6-72	HOX cluster	1151	chr7	-	27193137	27194288	NM_006896,	AGACCCGCAAGAAAGTGAATCTCACTACTACCTACTCCCCTAAAACTACCTATTTTGTGC
CUST_165_PI426075208	85.6097	96.4404	6.33834	6.66359	noncoding	nc-HOXD10-11+	nc-HOXD10-11	HOX cluster	118	chr2	-	176977568	176977686		ACACACTTTGTAAGATGGGGGTGGGGAGAGGTCTTCAGCCCCCAGAGGTTCTGGTCTGAT
CUST_83_PI426075208	401.122	341.615	8.55682	8.50558	noncoding	nc-HOXA1-55+	nc-HOXA1-55	HOX cluster	328	chr7	+	27136777	27137105		CTCATCACCCTACTTCCCTGAGGCTGCTGAGGTCGTTAAATTGTTGTTTACTATTAGGTT
CUST_118_PI426075208	123.092	113.487	6.86605	6.90559	noncoding	nc-HOXC11-116+	nc-HOXC11-116	HOX cluster	228	chr12	-	54366534	54366762		TCTAGCTGCTGCTCTTTTTTCCCCCAGGATTGGGGGAAGGAGGAGGGCTCTCATGTATGG
ASHG19A3H0000182	126.905	165.932	6.90899	7.45732	noncoding	nc-HOXD3-41-	nc-HOXD3-41	HOX cluster	128	chr2	+	177025459	177025587		GGGCCTGGGAGGGCTGGGCAGAAACCCAGGAGTGGGTGGGGGCGCGGGTGGCTGCCGCTC
ASHG19A3H0000194	233.57	262.793	7.78147	8.12313	noncoding	nc-HOXD4-31-	nc-HOXD4-31	HOX cluster	108	chr2	+	177010079	177010187		CAGTGTGGGTGTGGGGGTAGTGCTCCTAAAACTCCCACCCAGTTTTGAGCCCCCAAAGTT
CUST_110_PI426075208	273.568	244.806	8.0127	8.01813	noncoding	nc-HOXC11-108+	nc-HOXC11-108	HOX cluster	2358	chr12	-	54356056	54358414		AAGTTTTACATGTGGTGAATATACGTGCTGTATGTAATCTTTCCCCAGTCGGTTGCTTTC
ASHG19A3H0000157	61959	46323.5	15.8943	15.5368	noncoding	nc-HOXC9-131-	nc-HOXC9-131	HOX cluster	198	chr12	+	54384395	54384593		ACTGCTGCTGGGGGTCACCCCAAGAGCCCCCCACCCATCCAAGGAAAGGAATAAACTTAA
ASHG19A3A034086	258.241	413.141	7.92938	8.78481	noncoding	uc003syg.2	BC031342	UCSC_knowngene	721	chr7	+	27135742	27139584	nc-HOXA1-59+,	TCGCGTTGTCATTGGAACTTCCAAGCCTTTGCTGTTAAGAGCCAGGTTCTTAAATCAACC
CUST_62_PI426075208	89.0885	93.5706	6.40075	6.6201	noncoding	nc-HOXB9-185+	nc-HOXB9-185	HOX cluster	148	chr17	+	46708159	46708307		TTCCACACCCCCCAAGTGGGGATCTTAATTGTGAAGTAATGAAATCTTCTGCCAAACCTC
ASHG19A3H0000187	186.983	135.891	7.46283	7.16746	noncoding	nc-HOXD4-22-	nc-HOXD4-22	HOX cluster	706	chr2	+	176996730	176997436		TTCCTTTATAATGAATAGTTCGGGTGCGTTTTGTTTACTCCTAAAAGGTTTCTTTGCGTA
ASHG19A3H0000147	318.101	371.833	8.22602	8.63188	noncoding	nc-HOXC6-351-	nc-HOXC6-351	HOX cluster	875	chr12	+	54406545	54407420		AAAATAATAGAAGCTGGAATGACTTGCTTTTTCTCCACAGCTCTTCCCTATTCTCTACCT
CUST_68_PI426075208	5501.49	5224.02	12.3449	12.4339	noncoding	nc-HOXB9-195+	nc-HOXB9-195	HOX cluster	138	chr17	+	46780481	46780619		GGGTCTTGGTTAGCTTCTTTGCTATTTCCCCTCCTTACTCTTTTCTTCTCCCCTGTCTCC
CUST_74_PI426075208	178.813	169.256	7.39823	7.48725	noncoding	nc-HOXB9-203+	nc-HOXB9-203	HOX cluster	118	chr17	+	46799885	46800003		AAGAAGGCCTGCGGTTGGTGGCTCCCCACCTCATAGCTGCAAGTAGGGGCGAAAGCTGGA
ASHG19A3H0000122	26487.5	32453.6	14.6271	15.0356	noncoding	nc-HOXC13-102-	nc-HOXC13-102	HOX cluster	108	chr12	+	54332232	54332340		CCCTACACCCCTTTGCGTCGGCCAAATTCAGCCTCCCCCCCCTCCCTCTCCCTCCCTGGG
CUST_51_PI426075208	3698.3	2783.58	11.7814	11.5239	noncoding	nc-HOXB4-173+	nc-HOXB4-173	HOX cluster	138	chr17	+	46664300	46664438		AATCCCCCACCCCGCCAACCATTACCACCATGAGACTTGTGTGTGGAGTTGACTGTAGAG
ASHG19A3A047642	84.3728	88.266	6.31996	6.53465	noncoding	ENST00000512916	AC012531.10	Ensembl	724	chr12	-	54329795	54333427		AAATTTAGTGGCGAGAAGAAAGAAAGGGAACCATAGTCCTCTTCCTCAAGAAGACCAGCC
CUST_151_PI426075208	709.133	882.011	9.37964	9.86854	noncoding	nc-HOXC8-146+	nc-HOXC8-146	HOX cluster	108	chr12	-	54400135	54400243		ATTACGCGCTGCCTGCTTTGCACTTATCTCCTCCACAAAGCGATTATTTTTAATGCCTGC
ASHG19A3H0000200	116.738	100.78	6.79013	6.7283	noncoding	nc-HOXD8-19-	nc-HOXD8-19	HOX cluster	160	chr2	+	176989526	176989686	NM_014213,	GTTCCTGCCCGAGGACCAGTTGTAAATGTTACTGCTTCCTACTAATAAATGCTGACCTGA
CUST_155_PI426075208	110.176	136.272	6.70987	7.17217	noncoding	nc-HOXC8-150+	nc-HOXC8-150	HOX cluster	723	chr12	-	54402165	54402888		TAAGTCTGGAGACTTTGAGGAGGAACAAGCACACCATACTCCCAAATACTTCAGGCATCA
CUST_82_PI426075208	4888.62	6436.61	12.18	12.7298	noncoding	nc-HOXA1-54+	nc-HOXA1-54	HOX cluster	128	chr7	+	27136437	27136565		TCCCTCTCTCGTCGCTCTCCGCCCCTTTCTCTTTCCCACTCAGTTTTGCACCGGGAGCCC
CUST_124_PI426075208	136.265	72.1647	7.00789	6.25259	noncoding	nc-HOXC4-153+	nc-HOXC4-153	HOX cluster	519	chr12	-	54408220	54408739		TAGCAATCATAATTCCACGTTTAAAAACGAAACGGGACCTCAGCCATCCCTCGGAGTATG
ASHG19A3H0000064	7245.29	7126.48	12.746	12.8743	noncoding	nc-HOXB9-187-	nc-HOXB9-187	HOX cluster	168	chr17	-	46715907	46716075		TGGCTCTCTGTGAACAAAGCAGGTTTCCTCCTTGCCACTCACCCCCACCCCCCATACCAC
ASHG19A3H0000033	112.147	130.225	6.73509	7.10875	noncoding	nc-HOXA7-73-	nc-HOXA7-73	HOX cluster	148	chr7	-	27196467	27196615		AGGGATGGGGAGGATCCCAAGCTTGGTCCAGGGCTCACTAGCAGGAGTCGGCGGGGGGGC
CUST_92_PI426075208	296.011	403.162	8.12409	8.74771	noncoding	nc-HOXB6-181+	nc-HOXB6-181	HOX cluster	278	chr17	+	46683490	46683768	uc002inu.2,NR_033204,NR_033201,	GCCACACCGGCCTGGTAAACTCGCACCTCTTAGGATCTTGCTCCCGGACTCATTCCCTTC
ASHG19A3H0000043	577.453	429.413	9.07646	8.84404	noncoding	nc-HOXB2-160-	nc-HOXB2-160	HOX cluster	310	chr17	-	46622394	46622704		GGGGCTCATGGTGTCCTGGTCGTGGTCCTCTGGTGTTTTTGAATCAATTAAACCAAATAA
ASHG19A3H0000022	770.959	922.47	9.50224	9.93178	noncoding	nc-HOXA2-60-	nc-HOXA2-60	HOX cluster	148	chr7	-	27142497	27142645		TAGATAGATCCTTGCAGATCAGGAGGCACGCAGGCACCCTCGCCCCCACGTACTCCGGGA
CUST_35_PI426075208	84.8862	97.1892	6.32774	6.67399	noncoding	nc-HOXA7-75+	nc-HOXA7-75	HOX cluster	108	chr7	+	27200477	27200585		GGGTCAGGGAGGCGCGAGCGGTGAGGGTCGGGCAAGCCCCCGCCGATTCCTTGTTTCCCA
ASHG19A3H0000054	175.011	215.433	7.36645	7.83577	noncoding	nc-HOXB4-176-	nc-HOXB4-176	HOX cluster	158	chr17	-	46667810	46667968		CAAGTCTGGACACTTACCCGGTCAATCCCTTCCAGCTTGGCCCAACTTCTTACTGGACTT
ASHG19A3A047643	5662.28	3967.4	12.3842	12.0279	noncoding	NR_003716	HOTAIR	RefSeq_NR	2337	chr12	-	54356097	54362515	nc-HOXC11-108+,	CCTTGTGTAGGTTGTGTGTGTGTGGTGGTTTTATGCATAAATAAAGTTTTACATGTGGTG
ASHG19A3H0000014	10707.8	13335	13.3134	13.771	noncoding	nc-HOXA13-95-	nc-HOXA13-95	HOX cluster	218	chr7	-	27239898	27240116		TCGCAACCCAATCGCGCGCCCACCTCCCCTCCCCGCCTGGTTGCGCGGGTCTGGGCCCCA
ASHG19A3H0000028	140.889	300.246	7.05446	8.32045	noncoding	nc-HOXA4-66-	nc-HOXA4-66	HOX cluster	307	chr7	-	27180687	27180994		TAATTAATGCTGTTGTAGAGGTGACTTGATGAGACACAACTTGTTCGACGTGTAGTGACT
CUST_146_PI426075208	1041.44	1206.53	9.94178	10.3239	noncoding	nc-HOXC6-252+	nc-HOXC6-252	HOX cluster	442	chr12	-	54421751	54422193		GTTTTATATCTGCCCCCTTCTAAAATTACATCCTGATTTCTCCAAGGGAAGAACTCCCTC
CUST_113_PI426075208	570.146	576.757	9.05634	9.26484	noncoding	nc-HOXC11-111+	nc-HOXC11-111	HOX cluster	698	chr12	-	54360504	54361202		TTATTTTCCTCTCCTTCTTTCTCTCTGTTCATCCCCAGTGCTACCCTGGAGGAAAAGGAT
ASHG19A3H0000018	1062.44	1026.9	9.97028	10.0882	noncoding	nc-HOXA1-56-	nc-HOXA1-56	HOX cluster	318	chr7	-	27137277	27137595		TTTCCTGCCCGTGCTCCCTCTTAACCATGCTTGGGATGGATCAAAGTCACAAATACTATT
CUST_9_PI426075208	187.997	73.6913	7.46924	6.28052	noncoding	nc-HOXA11-91+	nc-HOXA11-91	HOX cluster	118	chr7	+	27232517	27232635		AACCACCTTCCACGCTGCCAAGAATTAAGACCGGGAGAGATTAAATACCCGATTATTCTC
ASHG19A3H0000166	1068.93	1377.41	9.97804	10.5144	noncoding	nc-HOXD10-12-	nc-HOXD10-12	HOX cluster	158	chr2	+	176977788	176977946		CGTCTGGATAGACCCCTTATTGCATTGGTGGTAGACTCCCCATTTGCCCCCTAGATTTCC
ASHG19A3H0000108	221.668	260.076	7.70927	8.10619	noncoding	nc-HOXC11-106-	nc-HOXC11-106	HOX cluster	158	chr12	+	54351436	54351594		AAGGGGCTACCAGCCATTGAGGTCCCACTCAGCCCCAGTTTCCCAGGCCCGTGAGAATGA
CUST_101_PI426075208	110.99	88.5561	6.7199	6.53909	noncoding	nc-HOXC10-122+	nc-HOXC10-122	HOX cluster	108	chr12	-	54374593	54374701		TGGTTTGCTTCTAAGTTGCCCCCAGTAAGTCAGGTTTCTAGCTAGAGTCGGGGCTGTGGT
ASHG19A3H0000063	60.5696	114.339	5.83702	6.91627	noncoding	nc-HOXB9-186-	nc-HOXB9-186	HOX cluster	168	chr17	-	46715352	46715520		TGCACATATTCACACACACACTCACACACAGGAATGCTGACACATACAGACCCGACTTTA
CUST_212_PI426075208	123.853	126.379	6.87416	7.06547	noncoding	nc-HOXD4-26+	nc-HOXD4-26	HOX cluster	1178	chr2	-	177003288	177004466		AAGAATTAATGCTACCACGGGGCTTACAAAGAACCCCTCAAGTCTTCCAAATCTGCCCAT
ASHG19A3H0000098	220.745	263.791	7.70341	8.128	noncoding	nc-HOXC10-119-	nc-HOXC10-119	HOX cluster	138	chr12	+	54371854	54371992		AAAAAGGAGGAAAAAGGGTTTTTTGGCCCCCAAACAAACCCACCTTCCGTCTCCCAAGGT
ASHG19A3H0000199	688.587	706.166	9.33723	9.55151	noncoding	nc-HOXD4-36-	nc-HOXD4-36	HOX cluster	262	chr2	+	177015849	177016111		ACTCTGCCCAACTCAGAGGCGAGTTCACCCACCCACCTTTCATTGCTCTGTACCCCAATA
ASHG19A3H0000106	82.6475	83.6886	6.29059	6.46038	noncoding	nc-HOXC10-127-	nc-HOXC10-127	HOX cluster	248	chr12	+	54377713	54377961		ACGGTTCCCCTTATTTCTTCCTTTTATTTAAAAACAACCACAAAAATAGACTGGTCTGTC
ASHG19A3A009657	1051.45	1230.7	9.9561	10.3524	noncoding	NR_024103	C17orf93	RefSeq_NR	564	chr17	+	46800541	46802119	ENST00000422730,	GAATGGTATAAATTTCAAAAACAACGAAACCTTCTTTTGCCCCCTCCGCAGCAGTCGCCT
ASHG19A3H0000099	137.289	185.684	7.01756	7.62013	noncoding	nc-HOXC10-120-	nc-HOXC10-120	HOX cluster	208	chr12	+	54372104	54372312		GCCCTAAATAGTAAACAAACCTGTAGTGGAGGGTCTTGGCTCTCCCAACACACTCAGACC
CUST_138_PI426075208	364.957	594.068	8.42187	9.3069	noncoding	nc-HOXC6-244+	nc-HOXC6-244	HOX cluster	1488	chr12	-	54415121	54416609		ACATTGATATTTCCCCTCTGCTCTGTCTTTTTGTGTCTCTGGAAGGGAAAAAGGCTGGGA
CUST_134_PI426075208	1648.36	1822.77	10.5991	10.9239	noncoding	nc-HOXC6-240+	nc-HOXC6-240	HOX cluster	288	chr12	-	54412701	54412989		ATGCAAACTGTATTTTTAAAAATTTGATAAAAACAGGTTTCTTCCCCCATCCCCGCCCCC
CUST_81_PI426075208	2993.76	3667.1	11.4587	11.9185	noncoding	nc-HOXA1-53+	nc-HOXA1-53	HOX cluster	138	chr7	+	27135887	27136025		CGCCCCCTCCCCACCGTTCAATGAAAGATGAACTGGCGAGAGGTGAGAAGGGAAGAGGGC
CUST_94_PI426075208	385.968	468.513	8.50328	8.9658	noncoding	nc-HOXB9-193+	nc-HOXB9-193	HOX cluster	858	chr17	+	46768301	46769159		TTCCTCTGGGGCCCTTCACAATAACTGTGCATCCCTTCAGAGTAATGTCAACATTTTCTG
ASHG19A3H0000116	4042.33	4164.53	11.9042	12.0969	noncoding	nc-HOXC11-114-	nc-HOXC11-114	HOX cluster	128	chr12	+	54364584	54364712		CTCCTCACAGGATACAGCCCCTACCCCCATCTCAGTCCTGGCTTTGCTGAATCTGCCTTG
CUST_40_PI426075208	11140.2	12989	13.3687	13.7373	noncoding	nc-HOXB1-156+	nc-HOXB1-156	HOX cluster	128	chr17	+	46609401	46609529		TCTCCTGGTTCCCTCCTACCTGTCTCTCCTTCACCACCCTCCATCTCCTTCCAAAAAAAA
ASHG19A3A009656	1455.15	1516.39	10.4222	10.6481	noncoding	ENST00000489624	COX6B1P2	Ensembl	216	chr17	+	46791091	46791307		TTTGTATGTGAATGGTACCAGCCTGTGTACAAGTCCCTCATTCCCATATCCTGGATCTCA
CUST_12_PI426075208	1283.54	2439.31	10.2385	11.3383	noncoding	nc-HOXA13-100+	nc-HOXA13-100	HOX cluster	916	chr7	+	27245788	27246704		ACTTATTAGTGGGTAAATGACTATATTTCATTTCAGCACAACTTCTCCCCTGGTAGAAAC
CUST_19_PI426075208	66.0937	71.4983	5.96759	6.2388	noncoding	nc-HOXA1-57+	nc-HOXA1-57	HOX cluster	458	chr7	+	27137677	27138135		TTCTGGGGCATCCTGGGTGGAGTGTTTTTCTTGGGATCACGAGCTTGCACTCGCACACAG
CUST_196_PI426075208	100.504	109.614	6.58218	6.8544	noncoding	nc-HOXD4-33+	nc-HOXD4-33	HOX cluster	208	chr2	-	177012179	177012387		ATAAAGCAGACACATATAACACACAGAAAAATGACAAGGCCCAGATACCCCACCAATACC
ASHG19A3H0000051	182.948	100.023	7.43303	6.71913	noncoding	nc-HOXB4-173-	nc-HOXB4-173	HOX cluster	138	chr17	-	46664300	46664438		CTCTACAGTCAACTCCACACACAAGTCTCATGGTGGTAATGGTTGGCGGGGTGGGGGATT
CUST_213_PI426075208	4869.12	5735.99	12.1746	12.5688	noncoding	nc-HOXD8-21+	nc-HOXD8-21	HOX cluster	348	chr2	-	176993168	176993516	nc-HOXD8-21-,	AATGTCCAATAAATGCAATGGTTCTCTGTTGTGTGTGTGTGTTTTCCCCTCTCCTGCTCG
CUST_177_PI426075208	7233.58	9832.61	12.7431	13.3338	noncoding	nc-HOXD1-48+	nc-HOXD1-48	HOX cluster	138	chr2	-	177046473	177046611		AGAGACACTTTTTACTAGCATAATTTATATATATGTGTGTGTGTGTGTGTACTCCACAGG
CUST_72_PI426075208	773.928	703.448	9.50815	9.54659	noncoding	nc-HOXB9-201+	nc-HOXB9-201	HOX cluster	238	chr17	+	46795819	46796057		AGATTAAGATTGAAAGTCCTTTCTCGCAGCTTCATTTTCGCCCCCACACTGTCCCAAATG
